# Supplementary material for: Azospirillum Genomes Reveal Transition of Bacteria from Aquatic to Terrestrial Environments
Source: PubMed Central journal article supplement (PMC3245306; doi:10.1371/journal.pgen.1002430), 2011-12-22
Supplement: pgen.1002430.s001.pdf [file pgen.1002430.s001.pdf]

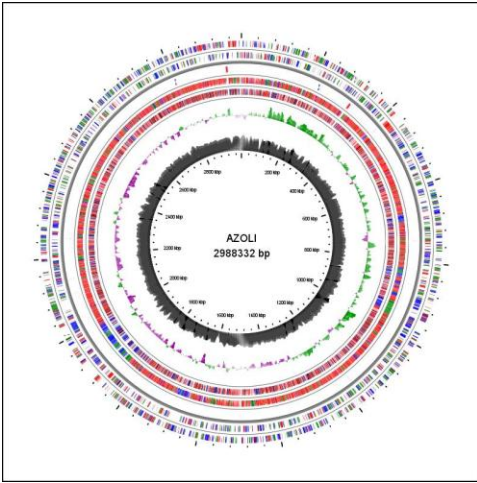

A. *A. lipoferum* 4B – chromosome – AZOLI

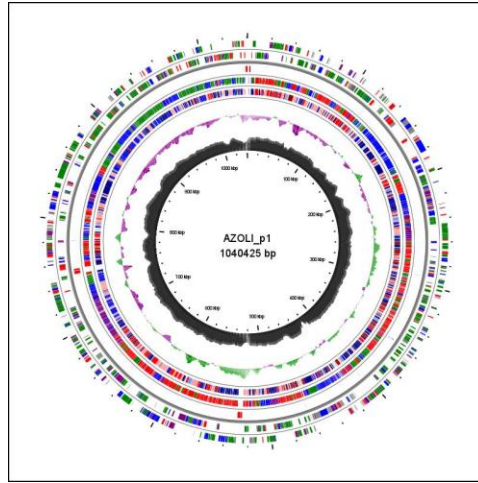

B. *A. lipoferum* 4B – chromid 1 – AZOLI\_p1

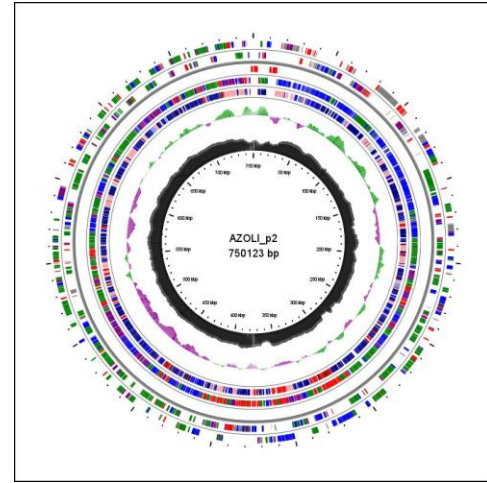

C. *A. lipoferum* 4B – chromid 2 – AZOLI\_p2

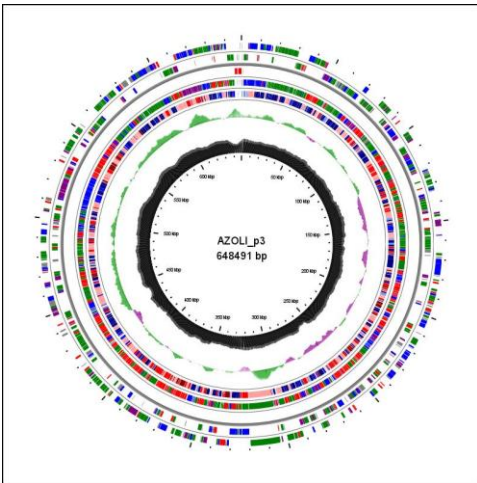

D. *A. lipoferum* 4B – chromid 3 – AZOLI\_p3

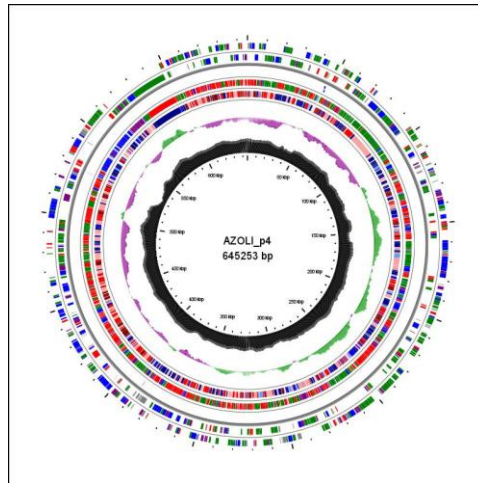

E. *A. lipoferum* 4B – chromid 4 – AZOLI\_p4

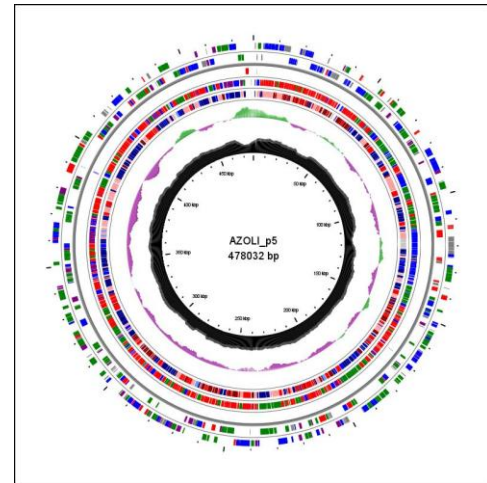

F. *A. lipoferum* 4B – chromid 5 – AZOLI\_p5

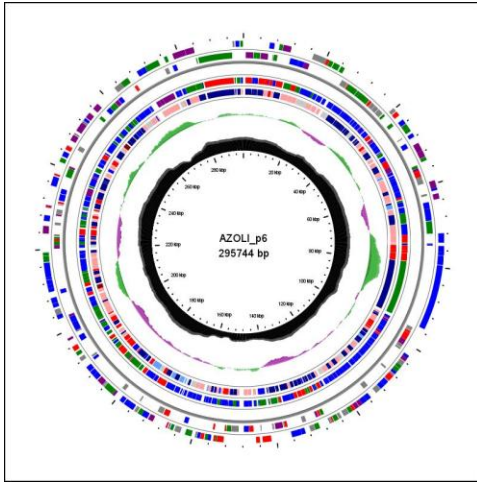

G. *A. lipoferum* 4B – plasmid 1 – AZOLI\_p6

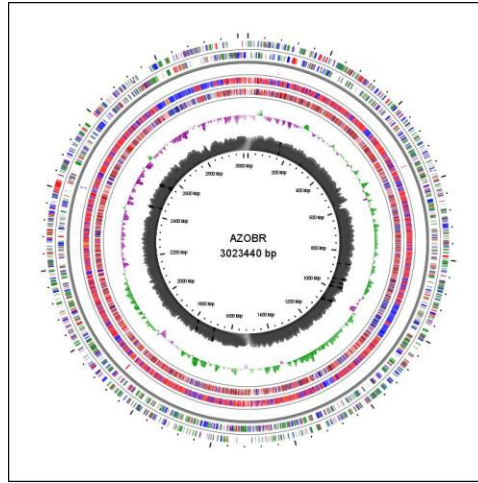

H. *A. brasilense* Sp245 – chromosome –AZOBR

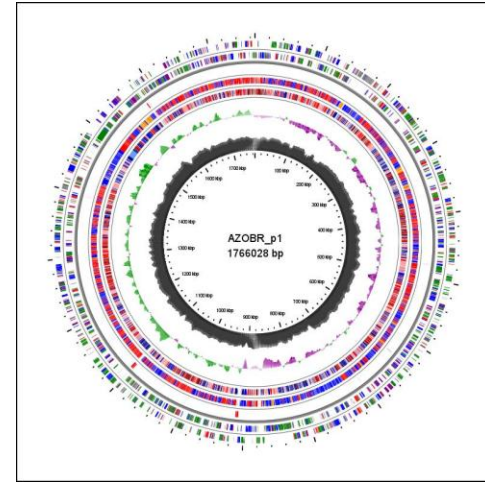

I. *A. brasilense* Sp245 – chromid 1 –AZOBR\_p1

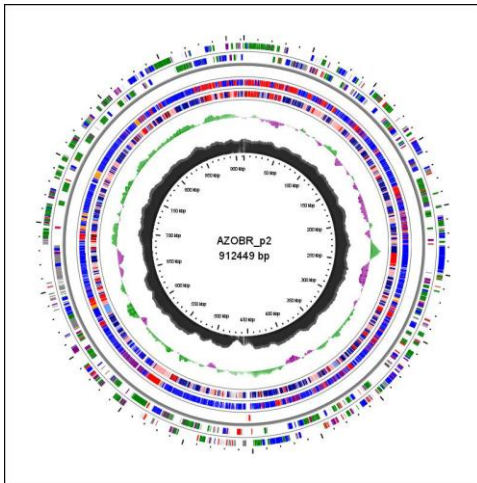

J. *A. brasilense* Sp245 – chromid 2 –AZOBR\_p2

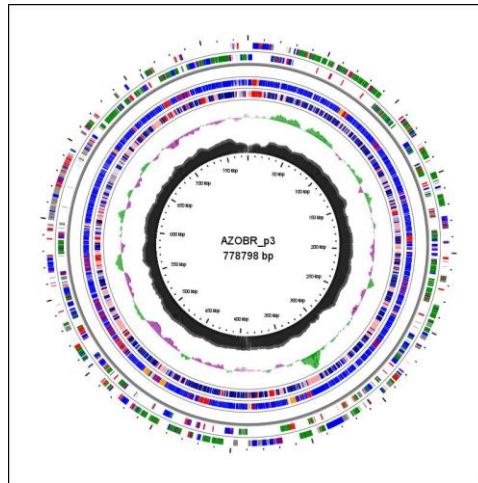

K. *A. brasilense* Sp245 – plasmid 1 –AZOBR\_p3

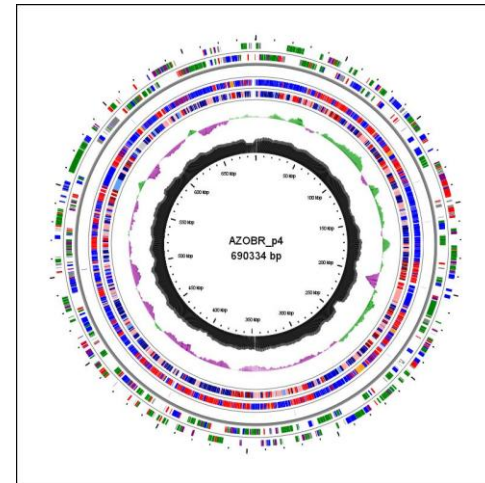

L. *A. brasilense* Sp245 – chromid 3 –AZOBR\_p4

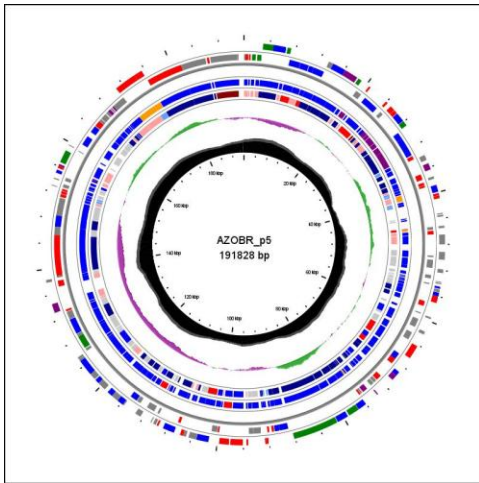

M *A. brasilense* Sp245 – plasmid 2 –AZOBR\_p5

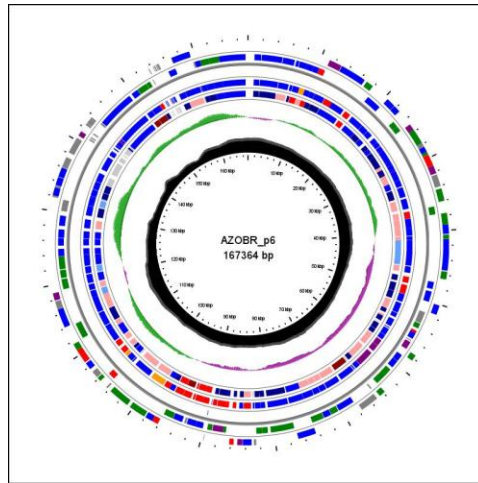

N *A. brasilense* Sp245 – plasmid 3 –AZOBR\_p6
