# Supplementary material for: Azospirillum Genomes Reveal Transition of Bacteria from Aquatic to Terrestrial Environments
Source: PubMed Central journal article supplement (PMC3245306; doi:10.1371/journal.pgen.1002430), 2011-12-22
Supplement: pgen.1002430.s005.pdf [file pgen.1002430.s005.pdf]

**Table S2.** Identification of chromids in *Azospirillum* by house-keeping gene analysis

| Housekeeping Genes                                                                                | 4B           | Sp245          | B510       |
|---------------------------------------------------------------------------------------------------|--------------|----------------|------------|
| 1-(5-phosphoribosyl)-5-[(5-phosphoribosylamino)methylideneamino]imidazole-4-carboxamide isomerase | AZOLI_3051   | AZOBR_10372    | AZL_028790 |
| 16S rRNA processing protein                                                                       | AZOLI_0372   | AZOBR_40189    | AZL_005170 |
| 1-deoxy-D-xylulose 5-phosphate synthase                                                           | AZOLI_p30184 | AZOBR_p1140022 | AZL_c00990 |
| 1-deoxy-D-xylulose-5-phosphate synthase                                                           |              | AZOBR_p140100  |            |
| 1-hydroxy-2-methyl-2-(E)-butenyl 4-diphosphate synthase                                           | AZOLI_2859   | AZOBR_p1110054 | AZL_001390 |
| 30S ribosomal protein S4                                                                          | AZOLI_2437   | AZOBR_40368    | AZL_023540 |
| 30S ribosomal protein S9                                                                          | AZOLI_p10094 | AZOBR_100379   | AZL_a00320 |
| 30S ribosomal subunit protein S1                                                                  | AZOLI_0174   | AZOBR_40092    | AZL_002930 |
| 30S ribosomal subunit protein S10                                                                 | AZOLI_0460   | AZOBR_150257   | AZL_005800 |
| 30S ribosomal subunit protein S11                                                                 | AZOLI_1845   | AZOBR_100177   | AZL_018770 |
| 30S ribosomal subunit protein S12                                                                 | AZOLI_0455   | AZOBR_160004   | AZL_005760 |
| 30S ribosomal subunit protein S17                                                                 | AZOLI_0470   | AZOBR_150247   | AZL_005900 |
| 30S ribosomal subunit protein S19                                                                 | AZOLI_0465   | AZOBR_150252   | AZL_005850 |
| 30S ribosomal subunit protein S2                                                                  | AZOLI_1070   | AZOBR_100274   | AZL_016260 |
| 30S ribosomal subunit protein S3                                                                  | AZOLI_0467   | AZOBR_150250   | AZL_005870 |
| 30S ribosomal subunit protein S5                                                                  | AZOLI_0478   | AZOBR_150238   | AZL_005980 |
| 30S ribosomal subunit protein S7                                                                  | AZOLI_0456   | AZOBR_160003   | AZL_005770 |
| 30S ribosomal subunit protein S8                                                                  | AZOLI_0475   | AZOBR_150241   | AZL_005950 |
| 30S ribosomal subunit protein S9                                                                  |              | AZOBR_150242   |            |
| 3-dehydroquinase synthase                                                                         | AZOLI_2944   | AZOBR_40120    | AZL_000830 |
| 3-isopropylmalate dehydratase, large subunit                                                      | AZOLI_2479   | AZOBR_40194    | AZL_023920 |
| 3-isopropylmalate dehydratase, small subunit                                                      | AZOLI_0698   | AZOBR_200181   | AZL_008890 |
| 3-isopropylmalate dehydrogenase                                                                   | AZOLI_0699   | AZOBR_200179   | AZL_008900 |
| 3-methyl-2-oxobutanoate hydroxymethyltransferase                                                  | AZOLI_1886   | AZOBR_100084   | AZL_019370 |
| 3-oxoacyl-[acyl-carrier-protein] reductase                                                        | AZOLI_1673   | AZOBR_110107   | AZL_016740 |
| 4-hydroxy-3-methylbut-2-enyl diphosphate reductase                                                | AZOLI_1245   | AZOBR_150037   | AZL_015900 |
| 50S ribosomal protein L19                                                                         | AZOLI_0374   | AZOBR_40191    | AZL_005190 |
| 50S ribosomal protein L31                                                                         | AZOLI_2402   | AZOBR_150224   | AZL_023230 |
| 50S ribosomal protein L9                                                                          | AZOLI_1679   | AZOBR_110102   | AZL_016800 |
| 50S ribosomal subunit protein L1                                                                  | AZOLI_0446   | AZOBR_160011   | AZL_005690 |
| 50S ribosomal subunit protein L10                                                                 | AZOLI_0448   | AZOBR_160010   | AZL_005700 |
| 50S ribosomal subunit protein L11                                                                 | AZOLI_0445   | AZOBR_160012   | AZL_005680 |
| 50S ribosomal subunit protein L13                                                                 | AZOLI_p10093 | AZOBR_100378   | AZL_a00310 |
| 50S ribosomal subunit protein L14                                                                 | AZOLI_0471   | AZOBR_150246   | AZL_005910 |
| 50S ribosomal subunit protein L15                                                                 | AZOLI_0480   | AZOBR_150236   | AZL_006000 |
| 50S ribosomal subunit protein L16                                                                 | AZOLI_0468   | AZOBR_150249   | AZL_005880 |
| 50S ribosomal subunit protein L17                                                                 | AZOLI_1843   | AZOBR_100179   | AZL_018750 |
| 50S ribosomal subunit protein L18                                                                 | AZOLI_0477   | AZOBR_150239   | AZL_005970 |
| 50S ribosomal subunit protein L2                                                                  | AZOLI_0464   | AZOBR_150253   | AZL_005840 |
| 50S ribosomal subunit protein L20                                                                 | AZOLI_0107   | AZOBR_10192    | AZL_026000 |
| 50S ribosomal subunit protein L22                                                                 | AZOLI_0466   | AZOBR_150251   | AZL_005860 |
| 50S ribosomal subunit protein L23                                                                 | AZOLI_0463   | AZOBR_150254   | AZL_005830 |
| 50S ribosomal subunit protein L24                                                                 | AZOLI_0472   | AZOBR_150245   | AZL_005920 |
| 50S ribosomal subunit protein L27                                                                 | AZOLI_2409   | AZOBR_40325    | AZL_023270 |
| 50S ribosomal subunit protein L3                                                                  | AZOLI_0461   | AZOBR_150256   | AZL_005810 |
| 50S ribosomal subunit protein L4                                                                  | AZOLI_0462   | AZOBR_150255   | AZL_005820 |
| 50S ribosomal subunit protein L5                                                                  | AZOLI_0473   | AZOBR_150244   | AZL_005930 |
| 50S ribosomal subunit protein L6                                                                  | AZOLI_0476   | AZOBR_150240   | AZL_005960 |
| 50S ribosomal subunit protein L7/L12                                                              | AZOLI_0449   | AZOBR_160009   | AZL_005710 |
| 7,8-Dihydro-6-hydroxymethylpterin-pyrophosphokinase                                               | AZOLI_p10810 | AZOBR_p110121  | AZL_a04360 |
| A/G-specific adenine glycosylase                                                                  | AZOLI_p30347 | AZOBR_p1130120 | AZL_c00560 |
| Acetolactate synthase, large subunit                                                              | AZOLI_2237   | AZOBR_100110   | AZL_021740 |
| Acetolactate synthase, small subunit                                                              | AZOLI_2236   | AZOBR_100111   | AZL_021730 |

|                                                                                                                             |              |                |            |
|-----------------------------------------------------------------------------------------------------------------------------|--------------|----------------|------------|
| Acetyl-coenzyme A synthetase                                                                                                | AZOLI_2526   | AZOBR_10049    | AZL_024380 |
| Acetyl-coenzyme A synthetase                                                                                                | AZOLI_2526   | AZOBR_10049    | AZL_024380 |
| Acetyl-coenzyme A synthetase                                                                                                | AZOLI_2526   | AZOBR_10049    | AZL_024380 |
| Acetylglutamate kinase                                                                                                      | AZOLI_0381   | AZOBR_40136    | AZL_005260 |
| Adenylate kinase                                                                                                            | AZOLI_0482   | AZOBR_150234   | AZL_006020 |
| Adenylosuccinate synthetase                                                                                                 | AZOLI_p30239 | AZOBR_150079   | AZL_c04110 |
| Adenylosuccinate synthetase                                                                                                 | AZOLI_p30239 | AZOBR_150079   | AZL_c04110 |
| Alanyl-tRNA synthetase                                                                                                      | AZOLI_p10762 | AZOBR_150171   | AZL_a04560 |
| Amidophosphoribosyltransferase                                                                                              | AZOLI_1187   | AZOBR_110090   | AZL_017000 |
| Anthranilate phosphoribosyltransferase                                                                                      | AZOLI_1096   | AZOBR_100304   | AZL_016010 |
| Anthranilate synthase component I                                                                                           | AZOLI_1036   | AZOBR_100311   | AZL_012360 |
| Argininosuccinate lyase                                                                                                     | AZOLI_p40218 | AZOBR_p140086  | AZL_d01140 |
| Argininosuccinate synthase                                                                                                  | AZOLI_2761   | AZOBR_10163    | AZL_002110 |
| Arginyl-tRNA synthetase                                                                                                     | AZOLI_p10771 | AZOBR_p120117  | AZL_a04470 |
| Aspartyl-tRNA synthetase                                                                                                    | AZOLI_1069   | AZOBR_p130143  | AZL_016270 |
| ATP-dependent chaperone                                                                                                     | AZOLI_2850   | AZOBR_p1110063 | AZL_001460 |
| ATP-dependent chaperone                                                                                                     | AZOLI_p30461 | AZOBR_p170093  | AZL_c04990 |
| ATP-dependent chaperone                                                                                                     |              | AZOBR_p210122  |            |
| ATP-dependent Clp protease proteolytic subunit                                                                              | AZOLI_1860   | AZOBR_100236   | AZL_019170 |
| ATP-dependent DNA helicase                                                                                                  | AZOLI_1658   | AZOBR_140194   | AZL_016620 |
| Bifunctional: 2-C-methyl-D-erythritol 4-phosphate cytidyltransferase/ 2-C-methyl-D-erythritol 2,4-cyclodiphosphate synthase | AZOLI_1339   | AZOBR_p110006  | AZL_015110 |
| Bifunctional: 5,10-methylene-tetrahydrofolate dehydrogenase; 5,10-methylene-tetrahydrofolate cyclohydrolase                 | AZOLI_2920   | AZOBR_10134    | AZL_026930 |
| Bifunctional: 5,10-methylene-tetrahydrofolate dehydrogenase; 5,10-methylene-tetrahydrofolate cyclohydrolase                 |              |                | AZL_a09610 |
| Bifunctional: diaminoxyphosphoribosylaminopyrimidine deaminase/5-amino-6-(5-phosphoribosylamino) uracil reductase           | AZOLI_0872   | AZOBR_140241   | AZL_010180 |
| Bifunctional: IMP cyclohydrolase/phosphoribosylaminoimidazolecarboxamide formyltransferase                                  | AZOLI_2745   | AZOBR_10040    | AZL_002390 |
| Carbamoyl phosphate synthase, large subunit                                                                                 | AZOLI_0141   | AZOBR_180250   | AZL_002620 |
| Carbamoyl phosphate synthetase, small subunit                                                                               | AZOLI_0928   | AZOBR_150132   | AZL_010540 |
| Carboxy-terminal-processing peptidase S41A                                                                                  | AZOLI_2415   | AZOBR_40311    | AZL_023320 |
| Cell division protein FtsH; ATP-dependent metalloprotease                                                                   | AZOLI_0837   | AZOBR_100329   | AZL_009880 |
| Cell division protein FtsZ                                                                                                  | AZOLI_2137   | AZOBR_180108   | AZL_020880 |
| Chaperone protein, heat shock protein (Hsp40)                                                                               | AZOLI_2991   | AZOBR_10494    | AZL_000400 |
| Chaperone protein, heat shock protein (HSP70)                                                                               | AZOLI_2990   | AZOBR_10493    | AZL_000410 |
| Chorismate synthase                                                                                                         | AZOLI_2271   | AZOBR_150090   | AZL_022220 |
| Chromosomal replication initiator protein dnaA                                                                              | AZOLI_0002   | AZOBR_10277    | AZL_026690 |
| Chromosome partitioning protein                                                                                             | AZOLI_3020   | AZOBR_100099   | AZL_000140 |
| Chromosome partitioning protein                                                                                             | AZOLI_3019   | AZOBR_10404    | AZL_000150 |
| Component in transcription antitermination                                                                                  | AZOLI_0443   | AZOBR_160013   | AZL_005670 |
| Conserved protein of unknown function                                                                                       | AZOLI_p10096 | AZOBR_110019   | AZL_a00340 |
| Conserved protein of unknown function                                                                                       | AZOLI_0824   | AZOBR_140009   | AZL_009760 |
| Conserved protein of unknown function                                                                                       | AZOLI_2419   | AZOBR_40317    | AZL_023360 |
| Conserved protein of unknown function; putative ATPase domain                                                               | AZOLI_3166   | AZOBR_10116    | AZL_027170 |
| Conserved protein of unknown function; putative cysteine hydrolases domain                                                  | AZOLI_2288   | AZOBR_p440149  | AZL_022340 |
| Conserved protein of unknown function; putative kinase domain                                                               | AZOLI_3165   | AZOBR_10117    | AZL_027180 |
| Conserved protein of unknown function; putative PLP-binding barrel domain                                                   | AZOLI_0060   | AZOBR_10415    | AZL_026290 |
| CTP synthase                                                                                                                | AZOLI_1224   | AZOBR_100316   | AZL_013700 |
| Cysteinyl-tRNA synthetase                                                                                                   | AZOLI_2357   | AZOBR_40357    | AZL_022910 |
| Cytidine and deoxycytidylate deaminase                                                                                      | AZOLI_1948   | AZOBR_40412    | AZL_019820 |
| D-alanine-D-alanine ligase                                                                                                  | AZOLI_2134   | AZOBR_180105   | AZL_020850 |
| Delta-aminolevulinic acid dehydratase                                                                                       | AZOLI_1110   | AZOBR_110120   | AZL_014030 |

|                                                                                        |              |                |            |
|----------------------------------------------------------------------------------------|--------------|----------------|------------|
| Dephospho-CoA kinase                                                                   | AZOLI_3030   | AZOBR_10393    | AZL_000040 |
| Diaminopimelate decarboxylase                                                          | AZOLI_p40216 | AZOBR_p140088  | AZL_d01130 |
| Dihydropteroate synthase                                                               | AZOLI_p50060 | AZOBR_100215   | AZL_e01240 |
| Dihydroxyacid dehydratase (DAD)                                                        | AZOLI_p40147 | AZOBR_p110151  | AZL_d00200 |
| Dimethyladenosine transferase                                                          | AZOLI_1824   | AZOBR_p130171  | AZL_018600 |
| dITP/XTP pyrophosphatase                                                               | AZOLI_3016   | AZOBR_10485    | AZL_000180 |
| Division-specific transpeptidase                                                       | AZOLI_2124   | AZOBR_180093   | AZL_020760 |
| DNA gyrase subunit B                                                                   | AZOLI_3153   | AZOBR_p170041  | AZL_027280 |
| DNA gyrase, subunit A                                                                  | AZOLI_1235   | AZOBR_p120069  | AZL_013920 |
| DNA helicase II                                                                        | AZOLI_1919   | AZOBR_180127   | AZL_019670 |
| DNA ligase                                                                             | AZOLI_2143   | AZOBR_180112   | AZL_020910 |
| DNA mismatch repair protein MutL                                                       | AZOLI_1931   | AZOBR_70002    | AZL_019750 |
| DNA mismatch repair protein MutS                                                       | AZOLI_1558   | AZOBR_10469    | AZL_017120 |
| DNA polymerase I                                                                       | AZOLI_p30313 | AZOBR_p440034  | AZL_c04610 |
| DNA polymerase III (gamma and tau subunits)                                            | AZOLI_2632   | AZOBR_40273    | AZL_025120 |
| DNA polymerase III, alpha subunit                                                      | AZOLI_p40433 | AZOBR_100271   | AZL_d01720 |
| DNA polymerase III, beta-subunit                                                       | AZOLI_3155   | AZOBR_p170039  | AZL_027260 |
| DNA primase                                                                            | AZOLI_0931   | AZOBR_150129   | AZL_010570 |
| DNA processing single strand binding protein                                           | AZOLI_1814   | AZOBR_p130067  | AZL_018520 |
| DNA repair protein                                                                     | AZOLI_1185   | AZOBR_110092   | AZL_017020 |
| DNA repair protein RecN                                                                | AZOLI_1909   | AZOBR_180116   | AZL_019580 |
| DNA translocase                                                                        | AZOLI_0155   | AZOBR_10505    | AZL_002770 |
| DNA translocase                                                                        | AZOLI_p40638 | AZOBR_180242   | AZL_d00740 |
| DNA-(apurinic or apyrimidinic site) lyase                                              | AZOLI_3098   | AZOBR_10347    | AZL_028370 |
| DNA-directed RNA polymerase alpha chain                                                | AZOLI_1844   | AZOBR_100178   | AZL_018760 |
| Elongation factor G (EF-G)                                                             | AZOLI_0457   | AZOBR_150110   | AZL_005780 |
| Elongation factor G (EF-G)                                                             | AZOLI_1851   | AZOBR_160002   | AZL_018800 |
| Elongation factor Ts (EF-Ts)                                                           | AZOLI_1071   | AZOBR_100276   | AZL_016250 |
| Elongation factor Tu (EF-Tu)                                                           | AZOLI_0439   | AZOBR_160001   | AZL_005650 |
| Elongation factor Tu (EF-Tu)                                                           | AZOLI_0458   | AZOBR_160015   | AZL_005790 |
| Enolase (2-phosphoglycerate dehydratase)                                               | AZOLI_p10268 | AZOBR_100325   | AZL_a02700 |
| Enolase (2-phosphoglycerate dehydratase)                                               | AZOLI_p20459 | AZOBR_p420024  | AZL_b03090 |
| Excinuclease ABC, subunit A                                                            | AZOLI_1383   | AZOBR_p120082  | AZL_014850 |
| Excinuclease of the UvrABC repair system                                               | AZOLI_1261   | AZOBR_p130191  | AZL_015800 |
| Ferric uptake regulator                                                                | AZOLI_2595   | AZOBR_10297    | AZL_024860 |
| Ferric uptake regulator                                                                | AZOLI_2652   | AZOBR_200223   | AZL_026170 |
| Ferric uptake regulator                                                                |              | AZOBR_p150055  |            |
| FolC bifunctional protein [Tetrahydrofolate synthase; Dihydrofolate synthase]          | AZOLI_2925   | AZOBR_10102    | AZL_027050 |
| Fused UDP-N-acetylglucosamine pyrophosphate/glucosamine-1-phosphate acetyl transferase | AZOLI_p10414 | AZOBR_140159   | AZL_a07260 |
| Gamma-glutamyl phosphate reductase                                                     | AZOLI_2421   | AZOBR_40319    | AZL_023380 |
| Glucosamine-fructose-6-phosphate aminotransferase                                      | AZOLI_p10413 | AZOBR_140158   | AZL_a07270 |
| Glucose-inhibited division protein A                                                   | AZOLI_3022   | AZOBR_10401    | AZL_000120 |
| Glutamate 5-kinase                                                                     | AZOLI_2412   | AZOBR_40323    | AZL_023290 |
| Glutamate synthase, alpha subunit                                                      | AZOLI_2890   | AZOBR_p1110032 | AZL_000990 |
| Glutamate synthase, alpha subunit                                                      |              | AZOBR_p1110033 |            |
| Glutamine synthetase                                                                   | AZOLI_1867   | AZOBR_100228   | AZL_019220 |
| Glutamyl-tRNA synthetase                                                               | AZOLI_1089   | AZOBR_100296   | AZL_016080 |
| Glyceraldehyde-3-phosphate dehydrogenase (GAPDH)                                       | AZOLI_0815   | AZOBR_150011   | AZL_009710 |
| Glyceraldehyde-3-phosphate dehydrogenase (GAPDH)                                       | AZOLI_p20464 |                | AZL_b03040 |
| Glycerol-3-phosphate dehydrogenase (NAD+)                                              | AZOLI_0257   | AZOBR_10060    | AZL_004060 |
| GMP synthase (glutamine-hydrolyzing)                                                   | AZOLI_1516   | AZOBR_p130108  | AZL_011710 |
| GTPase involved in cell partitioning and DNA repair                                    | AZOLI_2411   | AZOBR_40324    | AZL_023280 |
| GTP-binding elongation factor                                                          | AZOLI_0118   | AZOBR_10180    | AZL_025910 |
| GTP-binding protein TypA/BipA                                                          | AZOLI_1055   | AZOBR_140217   | AZL_012510 |
| GTP-dependent nucleic acid-binding protein                                             | AZOLI_1962   | AZOBR_p440026  | AZL_019980 |
| Heat Shock Chaperone (HSP-70 cofactor)                                                 | AZOLI_3110   | AZOBR_10488    | AZL_028250 |

|                                                                                          |              |                |            |
|------------------------------------------------------------------------------------------|--------------|----------------|------------|
| Histidinol dehydrogenase                                                                 | AZOLI_p40530 | AZOBR_p1120021 | AZL_d03600 |
| Histidyl-tRNA synthetase                                                                 | AZOLI_1957   | AZOBR_40406    | AZL_019900 |
| Holliday junction DNA helicase ruvA                                                      | AZOLI_0826   | AZOBR_140011   | AZL_009780 |
| Holliday junction DNA helicase ruvB                                                      | AZOLI_0827   | AZOBR_140012   | AZL_009790 |
| Holliday junction resolvase RuvC                                                         | AZOLI_0825   | AZOBR_140010   | AZL_009770 |
| Hydroxymethylbilane synthase                                                             | AZOLI_0255   | AZOBR_10056    | AZL_004040 |
| Imidazole glycerol phosphate synthase, HisF subunit                                      | AZOLI_3052   | AZOBR_10373    | AZL_028780 |
| Imidazole glycerol phosphate synthase, HisH subunit                                      | AZOLI_3049   | AZOBR_10370    | AZL_028810 |
| Imidazoleglycerol-phosphate dehydratase                                                  | AZOLI_3048   | AZOBR_10369    | AZL_028820 |
| Indole-3-glycerol-phosphate synthase                                                     | AZOLI_1095   | AZOBR_100303   | AZL_016020 |
| Inner membrane insertion protein                                                         | AZOLI_0378   | AZOBR_40140    | AZL_005230 |
| Inosine-5'-monophosphate dehydrogenase                                                   | AZOLI_2145   | AZOBR_p130122  | AZL_020930 |
| Isoleucine tRNA synthetase                                                               | AZOLI_0609   | AZOBR_70014    | AZL_007060 |
| Isopentenyl-adenosine A37 tRNA methylthiolase                                            | AZOLI_3087   | AZOBR_10327    | AZL_028470 |
| Ketol-acid reductoisomerase                                                              | AZOLI_2232   | AZOBR_100112   | AZL_021700 |
| Large subunit of chaperonin GroESL                                                       | AZOLI_2685   | AZOBR_20016    | AZL_003460 |
| Large subunit of chaperonin GroESL                                                       | AZOLI_p10389 | AZOBR_p170096  | AZL_a01300 |
| Large subunit of chaperonin GroESL                                                       | AZOLI_p10728 | AZOBR_p270280  | AZL_c02850 |
| Leucine tRNA synthetase                                                                  | AZOLI_0067   | AZOBR_10408    | AZL_026240 |
| Lipoyl synthase                                                                          | AZOLI_0731   | AZOBR_50039    | AZL_009030 |
| Lipoyl synthase                                                                          | AZOLI_1335   | AZOBR_p110003  | AZL_015150 |
| Methionine aminopeptidase                                                                | AZOLI_0227   | AZOBR_110093   | AZL_017050 |
| Methionine aminopeptidase                                                                | AZOLI_1183   | AZOBR_40394    | AZL_025320 |
| Methionyl-tRNA formyltransferase                                                         | AZOLI_2491   | AZOBR_40200    | AZL_024040 |
| Methionyl-tRNA synthetase                                                                | AZOLI_1724   | AZOBR_130005   | AZL_018180 |
| Modification methylase HemK                                                              | AZOLI_2855   | AZOBR_p1110058 | AZL_001420 |
| N-acetyl-gamma-glutamyl-phosphate reductase                                              | AZOLI_p10095 | AZOBR_100380   | AZL_a00330 |
| Nucleoside diphosphate kinase                                                            | AZOLI_0990   | AZOBR_p130163  | AZL_018050 |
| Octaprenyl diphosphate synthase                                                          | AZOLI_p10352 | AZOBR_180071   | AZL_a03800 |
| O-sialoglycoprotein endopeptidase                                                        | AZOLI_0256   | AZOBR_10058    | AZL_004050 |
| Pantothenate synthetase                                                                  | AZOLI_p10480 | AZOBR_140166   | AZL_a03250 |
| Peptide chain release factor 1                                                           | AZOLI_2857   | AZOBR_p1110056 | AZL_001410 |
| Peptide methionine sulfoxide reductase                                                   | AZOLI_0157   | AZOBR_180235   | AZL_002790 |
| Peptide methionine sulfoxide reductase msrB                                              | AZOLI_p50224 | AZOBR_30021    | AZL_e02560 |
| Peptidyl-tRNA hydrolase                                                                  | AZOLI_1961   | AZOBR_p440154  | AZL_019940 |
| Phenylalanyl-tRNA synthetase alpha chain                                                 | AZOLI_0108   | AZOBR_10191    | AZL_025990 |
| Phenylalanyl-tRNA synthetase beta chain                                                  | AZOLI_0109   | AZOBR_10189    | AZL_025980 |
| Phosphatidate cytidyltransferase                                                         | AZOLI_1075   | AZOBR_100280   | AZL_016210 |
| Phosphoadenosine phosphosulfate reductase                                                | AZOLI_0771   | AZOBR_140266   | AZL_009340 |
| Phosphoenolpyruvate-protein phosphotransferase                                           | AZOLI_2958   | AZOBR_p430050  | AZL_000710 |
| Phosphoglycerate kinase                                                                  | AZOLI_2630   | AZOBR_40277    | AZL_025100 |
| Phospho-N-acetylmuramoyl-pentapeptide transferase                                        | AZOLI_2127   | AZOBR_180096   | AZL_020790 |
| Phosphopantetheine adenyltransferase                                                     | AZOLI_1234   | AZOBR_p120068  | AZL_013910 |
| Phosphopantothencysteine decarboxylase (CoaC);<br>Phosphopantothencysteine ligase (CoaB) | AZOLI_2934   | AZOBR_10233    | AZL_027120 |
| Phosphoribosylamine-glycine ligase                                                       | AZOLI_1951   | AZOBR_40409    | AZL_019850 |
| Phosphoribosylaminoimidazole carboxylase                                                 | AZOLI_1432   | AZOBR_100015   | AZL_017460 |
| Phosphoribosyl-AMP cyclohydrolase                                                        | AZOLI_1585   | AZOBR_120038   | AZL_012880 |
| Phosphoribosylformylglycinamide cyclo-ligase                                             | AZOLI_1191   | AZOBR_p130159  | AZL_013100 |
| Phosphoribosylglycinamide formyltransferase                                              | AZOLI_1190   | AZOBR_p130160  | AZL_013090 |
| Polynucleotide phosphorylase                                                             | AZOLI_3068   | AZOBR_10306    | AZL_028630 |
| Prephenate dehydratase                                                                   | AZOLI_0294   | AZOBR_40270    | AZL_004330 |
| Preprotein translocase secA subunit                                                      | AZOLI_0218   | AZOBR_40040    | AZL_025630 |
| Preprotein translocase secY subunit                                                      | AZOLI_0481   | AZOBR_150235   | AZL_006010 |
| Primosomal protein N' (replication factor Y)                                             | AZOLI_2610   | AZOBR_40300    | AZL_024970 |
| Protein-export membrane protein secD                                                     | AZOLI_1395   | AZOBR_p120096  | AZL_014530 |
| Pseudouridine synthase                                                                   | AZOLI_p40053 | AZOBR_150074   | AZL_d04590 |
| Putative 4Fe-4S ferredoxin, iron-sulfur binding                                          | AZOLI_2153   | AZOBR_100045   | AZL_021000 |

|                                                                        |              |                |            |
|------------------------------------------------------------------------|--------------|----------------|------------|
| Putative ABC transporter, ATP-binding component                        | AZOLI_2873   | AZOBR_p1110044 | AZL_001080 |
| Putative alanine racemase (alr)                                        | AZOLI_p50284 | AZOBR_110098   | AZL_e01720 |
| Putative ATPase of the MinD/MRP superfamily                            | AZOLI_p40466 | AZOBR_10403    | AZL_013580 |
| Putative deoxyribonuclease Tadd-like                                   | AZOLI_1725   | AZOBR_130006   | AZL_018190 |
| Putative Glutamate racemase                                            | AZOLI_2249   | AZOBR_110034   | AZL_021850 |
| Putative metalloprotease                                               | AZOLI_3085   | AZOBR_10325    | AZL_028490 |
| Putative N-acetylmuramoyl-L-alanine amidase                            | AZOLI_0387   | AZOBR_170005   | AZL_005320 |
| Putative N-acetylmuramoyl-L-alanine amidase I                          | AZOLI_p10327 | AZOBR_p1160055 | AZL_a03600 |
| Putative oxygen-independent coproporphyrinogen III oxidase (HemN-like) | AZOLI_3017   | AZOBR_10484    | AZL_000170 |
| Putative peptidase                                                     | AZOLI_2985   | AZOBR_10335    | AZL_000460 |
| Putative Peroxide-responsive repressor (PerR-like), fur family         | AZOLI_0078   | AZOBR_10218    | AZL_003780 |
| Putative phosphate starvation-inducible protein, PhoH-like             | AZOLI_3086   | AZOBR_10326    | AZL_028480 |
| Putative RNA methyltransferase                                         | AZOLI_2705   | AZOBR_10263    | AZL_003330 |
| Putative tetrapyrrole methyltransferase                                | AZOLI_3124   | AZOBR_10476    | AZL_028060 |
| Putative transferase (transferase hexapeptide repeat)                  | AZOLI_p20453 |                | AZL_b00660 |
| Putative translation factor (Sua5-like)                                | AZOLI_2476   | AZOBR_70173    | AZL_023880 |
| Pyrroline-5-carboxylate reductase                                      |              | AZOBR_100037   | AZL_017290 |
| Pyrroline-5-carboxylate reductase                                      |              | AZOBR_p230015  |            |
| Pyruvate kinase                                                        | AZOLI_p10527 | AZOBR_100175   | AZL_a09040 |
| Pyruvate kinase                                                        |              | AZOBR_p420013  |            |
| Recombinase A (recA)                                                   | AZOLI_1478   | AZOBR_150173   | AZL_012130 |
| Recombination protein RecR                                             | AZOLI_2635   | AZOBR_40275    | AZL_025140 |
| Replicative DNA helicase                                               | AZOLI_p50283 | AZOBR_110099   | AZL_e01730 |
| Riboflavin kinase and FAD synthetase                                   | AZOLI_0507   | AZOBR_70017    | AZL_006230 |
| Riboflavin synthase, beta subunit                                      | AZOLI_0869   | AZOBR_140244   | AZL_010150 |
| Ribonuclease HII                                                       | AZOLI_p40328 | AZOBR_p1130126 | AZL_d02320 |
| Ribonuclease R                                                         | AZOLI_2273   | AZOBR_p130133  | AZL_022230 |
| Ribose-phosphate pyrophosphokinase (RPPK)                              | AZOLI_2290   | AZOBR_p440152  | AZL_022350 |
| Ribosomal RNA large subunit methyltransferase N                        | AZOLI_2819   | AZOBR_10166    | AZL_001710 |
| Ribosome recycling factor                                              | AZOLI_1073   | AZOBR_100278   | AZL_016230 |
| Ribosome-associated GTPase                                             | AZOLI_1166   | AZOBR_140309   | AZL_017090 |
| Ribulose-phosphate 3-epimerase                                         | AZOLI_1322   | AZOBR_100154   | AZL_015270 |
| Ribulose-phosphate 3-epimerase                                         | AZOLI_p10722 |                |            |
| RNA polymerase sigma factor (sigma70)                                  | AZOLI_0932   | AZOBR_150128   | AZL_010580 |
| RNA polymerase, beta prime subunit                                     | AZOLI_0451   | AZOBR_160006   | AZL_005730 |
| S-adenosyl-dependent methyl transferase                                | AZOLI_2122   | AZOBR_180091   | AZL_020740 |
| S-adenosylmethionine synthetase                                        | AZOLI_3081   | AZOBR_10320    | AZL_028530 |
| S-adenosylmethionine:tRNA ribosyltransferase-isomerase                 | AZOLI_2150   | AZOBR_100049   | AZL_020970 |
| SamII subunit of chaperonin GroESL                                     | AZOLI_2686   | AZOBR_20015    | AZL_003450 |
| Serine acetyltransferase                                               | AZOLI_0542   | AZOBR_70110    | AZL_006530 |
| Serine hydroxymethyltransferase                                        | AZOLI_0862   | AZOBR_140239   | AZL_010090 |
| Serine hydroxymethyltransferase                                        | AZOLI_p10855 |                | AZL_c01670 |
| Serine O-acetyltransferase                                             | AZOLI_1974   | AZOBR_70184    | AZL_020070 |
| Seryl-tRNA synthetase                                                  | AZOLI_1401   | AZOBR_p120104  | AZL_014470 |
| Shikimate dehydrogenase                                                | AZOLI_3031   | AZOBR_10392    | AZL_000030 |
| Shikimate kinase                                                       | AZOLI_2943   | AZOBR_40121    | AZL_000840 |
| Signal peptidase I                                                     | AZOLI_1505   | AZOBR_p1170091 | AZL_011810 |
| Single-stranded DNA-binding protein                                    | AZOLI_1365   | AZOBR_p120080  | AZL_014860 |
| Single-stranded-DNA-specific exonuclease recJ                          | AZOLI_0789   | AZOBR_100398   | AZL_009490 |
| Site-specific tyrosine recombinase                                     | AZOLI_2940   | AZOBR_40126    | AZL_000870 |
| sn-glycerol-3-phosphate dehydrogenase FAD/NAD(P)-binding (aerobic)     | AZOLI_p50197 | AZOBR_p280087  | AZL_e03080 |
| Succinyl-CoA synthetase, alpha subunit, NAD(P)-binding                 | AZOLI_0205   | AZOBR_200164   | AZL_025770 |
| Succinyl-CoA synthetase, beta subunit                                  | AZOLI_0206   | AZOBR_200163   | AZL_025760 |
| Succinyl-CoA synthetase, beta subunit                                  | AZOLI_p10320 |                | AZL_a03540 |
| Succinyl-CoA synthetase, NAD(P)-binding, alpha subunit                 | AZOLI_p10321 |                | AZL_a03550 |
| TatABCE protein translocation system subunit                           | AZOLI_p10763 | AZOBR_p120107  | AZL_a04550 |

|                                                                                                                    |              |                |            |
|--------------------------------------------------------------------------------------------------------------------|--------------|----------------|------------|
| Thiamine-phosphate synthase                                                                                        | AZOLI_0809   | AZOBR_150017   | AZL_009640 |
| Thioredoxin 1, redox factor                                                                                        | AZOLI_3159   | AZOBR_10124    | AZL_027220 |
| Threonyl-tRNA synthetase                                                                                           | AZOLI_2575   | AZOBR_200035   | AZL_024740 |
| Thymidylate kinase                                                                                                 | AZOLI_1722   | AZOBR_130003   | AZL_018160 |
| Transaldolase                                                                                                      | AZOLI_2611   | AZOBR_40299    | AZL_024980 |
| Transcription repair coupling factor                                                                               | AZOLI_1467   | AZOBR_140180   | AZL_012200 |
| Transcription termination factor                                                                                   | AZOLI_3077   | AZOBR_10313    | AZL_028570 |
| Transferase involved in phenylacetate degradation                                                                  | AZOLI_2570   | AZOBR_100381   | AZL_024690 |
| Transketolase (TK)                                                                                                 | AZOLI_0816   | AZOBR_140002   | AZL_009720 |
| Transketolase (TK)                                                                                                 | AZOLI_p10717 |                |            |
| Transketolase (TK)                                                                                                 | AZOLI_p20253 |                |            |
| Translation initiation factor IF-1                                                                                 | AZOLI_p40538 | AZOBR_p1120026 | AZL_d03670 |
| Translation initiation factor IF-2                                                                                 | AZOLI_3075   |                | AZL_028590 |
| Trans-translation protein (ssrA RNA-binding protein)                                                               | AZOLI_1104   | AZOBR_110115   | AZL_013960 |
| Triosephosphate isomerase                                                                                          | AZOLI_1222   | AZOBR_100314   | AZL_013680 |
| tRNA (5-methylaminomethyl-2-thiouridylate)-methyltransferase                                                       | AZOLI_1980   | AZOBR_70189    | AZL_020120 |
| tRNA (Guanine-N(1)-)-methyltransferase                                                                             | AZOLI_0373   | AZOBR_40190    | AZL_005180 |
| tRNA (guanine-N(7)-)-methyltransferase                                                                             | AZOLI_3080   | AZOBR_10319    | AZL_028540 |
| tRNA delta(2)-isopentenylpyrophosphate transferase                                                                 | AZOLI_2239   | AZOBR_100108   | AZL_021760 |
| tRNA modification GTPase                                                                                           | AZOLI_3023   | AZOBR_10400    | AZL_000110 |
| tRNA pseudouridine synthase                                                                                        | AZOLI_3071   | AZOBR_10309    | AZL_028610 |
| tRNA-dihydrouridine synthase B                                                                                     | AZOLI_1341   | AZOBR_p110008  | AZL_015090 |
| tRNA-guanine transglycosylase                                                                                      | AZOLI_2151   | AZOBR_100048   | AZL_020980 |
| Tryptophan synthase, alpha subunit                                                                                 | AZOLI_2929   | AZOBR_10104    | AZL_027070 |
| Tryptophan synthase, beta subunit                                                                                  | AZOLI_2930   | AZOBR_10105    | AZL_027080 |
| Two component sensor histidine kinase; phosphate regulon                                                           | AZOLI_3010   | AZOBR_10247    | AZL_000230 |
| Two-component response regulator; phosphate regulon                                                                | AZOLI_3004   | AZOBR_10241    | AZL_000280 |
| Tyrosine tRNA synthetase                                                                                           | AZOLI_0340   | AZOBR_70181    | AZL_004860 |
| Tyrosine tRNA synthetase                                                                                           | AZOLI_2471   | AZOBR_p170010  | AZL_023840 |
| Ubiquinone/menaquinone biosynthesis methyltransferase                                                              | AZOLI_0096   | AZOBR_10285    | AZL_026020 |
| UDP-glucose 4-epimerase                                                                                            | AZOLI_p20384 | AZOBR_p210032  | AZL_a07190 |
| UDP-N-acetylglucosamine 1-carboxyvinyltransferase                                                                  | AZOLI_2260   | AZOBR_140031   | AZL_021950 |
| UDP-N-acetylglucosamine:N-acetylmuramyl-(pentapeptide) pyrophosphoryl-undecaprenol N-acetylglucosamine transferase | AZOLI_2130   | AZOBR_180099   | AZL_020820 |
| UDP-N-acetyl-muramate:alanine ligase                                                                               | AZOLI_2132   | AZOBR_180103   | AZL_020830 |
| UDP-N-acetylmuramoylalanine-D-glutamate ligase                                                                     | AZOLI_2128   | AZOBR_180097   | AZL_020800 |
| UDP-N-acetylmuramoyl-L-alanyl-D-glutamate-2,6-diaminopimelate ligase                                               | AZOLI_2125   | AZOBR_180094   | AZL_020770 |
| UDP-N-acetylmuramoyl-tripeptide-D-alanyl-D-alanine ligase                                                          | AZOLI_2126   | AZOBR_180095   | AZL_020780 |
| Undecaprenyl pyrophosphate synthetase                                                                              | AZOLI_1074   | AZOBR_100279   | AZL_016220 |
| Uridylate kinase                                                                                                   | AZOLI_1072   | AZOBR_100277   | AZL_016240 |
| Uroporphyrinogen-III C-methyltransferase                                                                           | AZOLI_p40238 | AZOBR_p140042  | AZL_d03380 |
| Valyl-tRNA synthetase                                                                                              | AZOLI_1559   | AZOBR_120063   | AZL_013080 |
| Zinc metalloprotease                                                                                               | AZOLI_1077   | AZOBR_100282   | AZL_016190 |

Table of proteins present in all chromid containing genomes [1], including their genomic location (as locus tags) in the 3 strains of *Azospirillum*. Those genes that remained on the ancestral/primary chromosome are colored in white. Those genes that migrated to a different replicon in 4B or B510 are in red. Those genes that migrated to a different replicon in Sp245 are in orange. Those genes that migrated to a different replicon in all 3 strains are in blue.

## References:

1. Harrison PW, Lower RP, Kim NK, Young JP (2010) Introducing the bacterial 'chromid': not a chromosome, not a plasmid. *Trends Microbiol* 18: 141-148.
