# Supplementary material for: Azospirillum Genomes Reveal Transition of Bacteria from Aquatic to Terrestrial Environments
Source: PubMed Central journal article supplement (PMC3245306; doi:10.1371/journal.pgen.1002430), 2011-12-22
Supplement: pgen.1002430.s007.pdf [file pgen.1002430.s007.pdf]

**Table S4.** ANI analysis of *Azospirillum* and rhizobial genomes

| Pair of strains* | Number of MUMs | MUMs (bp) | ANIm (%) | Coverage (%) | Genetic Distance † |
|------------------|----------------|-----------|----------|--------------|--------------------|
| 4B vs B510       | 1964           | 4 782 709 | 91       | 71           | 0.0114             |
| 4B vs Sp245      | 1637           | 2 012 936 | 89       | 33           | 0.0972             |
| CFN42 vs RI3841  | 649            | 2 796 109 | 89       | 43           | 0.0215             |
| CFN42 vs Sm1021  | 590            | 745403    | 84       | 11           | 0.110              |

\* 4B, *A. lipoferum* ; B510, *Azospirillum* sp. ; Sp245, *A. brasilense* ; CFN42, *Rhizobium etli* ; RI3841, *Rhizobium leguminosarum* biovar *viciae* ; Sm1021, *Sinorhizobium meliloti*.

† Genetic Distance based on concatenated ribosomal protein tree.

ANIm is the Average Nucleotide Identity calculated from the maximal unique matches (MUMs) determined by the MUMmer 2.1 program in pairwise comparisons [1].

References:

1. Delcher AL, Phillippy A, Carlton J, Salzberg SL (2002) Fast algorithms for large-scale genome alignment and comparison. *Nucleic Acids Res* 30: 2478-2483.
