# Supplementary material for: Azospirillum Genomes Reveal Transition of Bacteria from Aquatic to Terrestrial Environments
Source: PubMed Central journal article supplement (PMC3245306; doi:10.1371/journal.pgen.1002430), 2011-12-22
Supplement: pgen.1002430.s008.pdf [file pgen.1002430.s008.pdf]

**Table S5.** Recombination hotspots in *Azospirillum* genomes

| Strains <sup>a</sup> | Direct <sup>b</sup> repeats (>80bp) | Palindromic <sup>c</sup> repeats (>80bp) | IS <sup>d</sup> elements (potentially active) | CRISPR <sup>e</sup> |
|----------------------|-------------------------------------|------------------------------------------|-----------------------------------------------|---------------------|
| 4B                   | 497                                 | 412                                      | 99 (55)                                       | 126                 |
| B510                 | 1720                                | 1406                                     | 310 (176)                                     | 153                 |
| Sp245                | 283                                 | 256                                      | ND                                            | 12                  |

<sup>a</sup>4B, *A. lipoferum* ; B510, *Azospirillum* sp. ; Sp245, *A. brasilense*.

<sup>bc</sup>Direct and palindromic repeats were calculated using the repfind application of REPUTER with the default parameters [1].

<sup>d</sup>IS, Insertion sequences. ND, not determined.

<sup>e</sup>CRISPR, Clustered Regularly Interspaced Short Palindromic Repeats.

References:

1. Kurtz S, Choudhuri JV, Ohlebusch E, Schleiermacher C, Stoye J, et al. (2001) REPuter: the manifold applications of repeat analysis on a genomic scale. *Nucleic Acids Res* 29: 4633-4642.
