# Supplementary material for: Azospirillum Genomes Reveal Transition of Bacteria from Aquatic to Terrestrial Environments
Source: PubMed Central journal article supplement (PMC3245306; doi:10.1371/journal.pgen.1002430), 2011-12-22
Supplement: pgen.1002430.s009.pdf [file pgen.1002430.s009.pdf]

**Table S6.** Origin of *Azospirillum* genes

| <b>Locus Tag (4B)</b> | <b>Ancestry Assignment</b>                   | <b>Locus Tag (Sp245)</b> | <b>Ancestry Assignment</b>                   |
|-----------------------|----------------------------------------------|--------------------------|----------------------------------------------|
| AZOLI_0001            | Horizontally Transferred (high confidence)   | AZOBR_10001              | Unassigned                                   |
| AZOLI_0002            | Ancestral (high confidence)                  | AZOBR_10002              | Horizontally Transferred (high confidence)   |
| AZOLI_0003            | Horizontally Transferred (high confidence)   | AZOBR_10003              | Ancestral (low confidence)                   |
| AZOLI_0004            | Ancestral (medium confidence)                | AZOBR_10004              | Horizontally Transferred (high confidence)   |
| AZOLI_0005            | Ancestral (medium confidence)                | AZOBR_10005              | Ancestral (low confidence)                   |
| AZOLI_0006            | Ancestral (medium confidence)                | AZOBR_10006              | Horizontally Transferred (high confidence)   |
| AZOLI_0007            | Ancestral (high confidence)                  | AZOBR_10007              | Unassigned                                   |
| AZOLI_0008            | Ancestral (medium confidence)                | AZOBR_10008              | Ancestral (low confidence)                   |
| AZOLI_0009            | Horizontally Transferred (high confidence)   | AZOBR_10009              | Ancestral (high confidence)                  |
| AZOLI_0010            | Ancestral (low confidence)                   | AZOBR_10010              | Ancestral (high confidence)                  |
| AZOLI_0011            | Ancestral (low confidence)                   | AZOBR_10011              | Ancestral (low confidence)                   |
| AZOLI_0012            | Ancestral (high confidence)                  | AZOBR_10012              | Horizontally Transferred (high confidence)   |
| AZOLI_0013            | Unassigned                                   | AZOBR_10013              | Ancestral (low confidence)                   |
| AZOLI_0014            | Horizontally Transferred (low confidence)    | AZOBR_10014              | Ancestral (low confidence)                   |
| AZOLI_0015            | Horizontally Transferred (high confidence)   | AZOBR_10015              | Horizontally Transferred (medium confidence) |
| AZOLI_0016            | Horizontally Transferred (high confidence)   | AZOBR_10016              | Horizontally Transferred (high confidence)   |
| AZOLI_0018            | Unassigned                                   | AZOBR_10017              | Horizontally Transferred (high confidence)   |
| AZOLI_0019            | Unassigned                                   | AZOBR_10018              | Ancestral (high confidence)                  |
| AZOLI_0020            | Unassigned                                   | AZOBR_10019              | Ancestral (medium confidence)                |
| AZOLI_0021            | Unassigned                                   | AZOBR_10020              | Ancestral (medium confidence)                |
| AZOLI_0022            | Unassigned                                   | AZOBR_10021              | Unassigned                                   |
| AZOLI_0023            | Unassigned                                   | AZOBR_10022              | Ancestral (medium confidence)                |
| AZOLI_0024            | Unassigned                                   | AZOBR_10023              | Ancestral (medium confidence)                |
| AZOLI_0025            | Ancestral (medium confidence)                | AZOBR_10024              | Horizontally Transferred (high confidence)   |
| AZOLI_0026            | Horizontally Transferred (high confidence)   | AZOBR_10025              | Ancestral (low confidence)                   |
| AZOLI_0027            | Ancestral (medium confidence)                | AZOBR_10026              | Horizontally Transferred (high confidence)   |
| AZOLI_0028            | Ancestral (medium confidence)                | AZOBR_10027              | Ancestral (high confidence)                  |
| AZOLI_0029            | Horizontally Transferred (low confidence)    | AZOBR_10028              | Horizontally Transferred (high confidence)   |
| AZOLI_0030            | Unassigned                                   | AZOBR_10029              | Unassigned                                   |
| AZOLI_0031            | Ancestral (medium confidence)                | AZOBR_10030              | Unassigned                                   |
| AZOLI_0032            | Ancestral (medium confidence)                | AZOBR_10031              | Horizontally Transferred (high confidence)   |
| AZOLI_0033            | Horizontally Transferred (high confidence)   | AZOBR_10032              | Ancestral (high confidence)                  |
| AZOLI_0034            | Horizontally Transferred (high confidence)   | AZOBR_10033              | Horizontally Transferred (high confidence)   |
| AZOLI_0035            | Ancestral (medium confidence)                | AZOBR_10034              | Unassigned                                   |
| AZOLI_0036            | Ancestral (high confidence)                  | AZOBR_10035              | Horizontally Transferred (high confidence)   |
| AZOLI_0037            | Ancestral (high confidence)                  | AZOBR_10036              | Unassigned                                   |
| AZOLI_0038            | Ancestral (high confidence)                  | AZOBR_10037              | Horizontally Transferred (high confidence)   |
| AZOLI_0039            | Unassigned                                   | AZOBR_10038              | Ancestral (medium confidence)                |
| AZOLI_0041            | Unassigned                                   | AZOBR_10039              | Horizontally Transferred (high confidence)   |
| AZOLI_0044            | Horizontally Transferred (high confidence)   | AZOBR_10040              | Ancestral (medium confidence)                |
| AZOLI_0046            | Horizontally Transferred (high confidence)   | AZOBR_10041              | Ancestral (medium confidence)                |
| AZOLI_0047            | Horizontally Transferred (high confidence)   | AZOBR_10042              | Unassigned                                   |
| AZOLI_0048            | Ancestral (medium confidence)                | AZOBR_10043              | Ancestral (high confidence)                  |
| AZOLI_0049            | Horizontally Transferred (medium confidence) | AZOBR_10044              | Horizontally Transferred (high confidence)   |
| AZOLI_0050            | Ancestral (high confidence)                  | AZOBR_10045              | Ancestral (high confidence)                  |
| AZOLI_0051            | Ancestral (medium confidence)                | AZOBR_10046              | Ancestral (low confidence)                   |
| AZOLI_0052            | Ancestral (low confidence)                   | AZOBR_10047              | Ancestral (medium confidence)                |
| AZOLI_0053            | Ancestral (medium confidence)                | AZOBR_10048              | Ancestral (low confidence)                   |
| AZOLI_0054            | Horizontally Transferred (high confidence)   | AZOBR_10049              | Ancestral (high confidence)                  |
| AZOLI_0055            | Ancestral (low confidence)                   | AZOBR_10050              | Unassigned                                   |
| AZOLI_0056            | Ancestral (medium confidence)                | AZOBR_10051              | Ancestral (low confidence)                   |
| AZOLI_0057            | Ancestral (high confidence)                  | AZOBR_10052              | Ancestral (high confidence)                  |
| AZOLI_0058            | Ancestral (high confidence)                  | AZOBR_10053              | Ancestral (high confidence)                  |
| AZOLI_0059            | Ancestral (medium confidence)                | AZOBR_10054              | Ancestral (medium confidence)                |
| AZOLI_0060            | Ancestral (medium confidence)                | AZOBR_10055              | Ancestral (high confidence)                  |
| AZOLI_0061            | Horizontally Transferred (high confidence)   | AZOBR_10056              | Ancestral (medium confidence)                |
| AZOLI_0062            | Ancestral (high confidence)                  | AZOBR_10057              | Ancestral (low confidence)                   |
| AZOLI_0063            | Ancestral (high confidence)                  | AZOBR_10058              | Ancestral (high confidence)                  |
| AZOLI_0064            | Ancestral (high confidence)                  | AZOBR_10059              | Ancestral (low confidence)                   |
| AZOLI_0066            | Ancestral (high confidence)                  | AZOBR_10060              | Ancestral (medium confidence)                |
| AZOLI_0067            | Ancestral (high confidence)                  | AZOBR_10061              | Ancestral (medium confidence)                |
| AZOLI_0068            | Ancestral (medium confidence)                | AZOBR_10062              | Ancestral (high confidence)                  |
| AZOLI_0069            | Ancestral (high confidence)                  | AZOBR_10063              | Ancestral (low confidence)                   |
| AZOLI_0070            | Horizontally Transferred (high confidence)   | AZOBR_10064              | Horizontally Transferred (high confidence)   |
| AZOLI_0071            | Horizontally Transferred (high confidence)   | AZOBR_10065              | Ancestral (high confidence)                  |
| AZOLI_0072            | Ancestral (low confidence)                   | AZOBR_10066              | Unassigned                                   |
| AZOLI_0073            | Horizontally Transferred (low confidence)    | AZOBR_10067              | Unassigned                                   |
| AZOLI_0074            | Ancestral (low confidence)                   | AZOBR_10068              | Unassigned                                   |

|            |                                            |             |                                              |
|------------|--------------------------------------------|-------------|----------------------------------------------|
| AZOLI_0075 | Ancestral (high confidence)                | AZOBR_10069 | Unassigned                                   |
| AZOLI_0077 | Ancestral (high confidence)                | AZOBR_10070 | Horizontally Transferred (high confidence)   |
| AZOLI_0078 | Ancestral (high confidence)                | AZOBR_10071 | Horizontally Transferred (high confidence)   |
| AZOLI_0079 | Ancestral (medium confidence)              | AZOBR_10072 | Ancestral (low confidence)                   |
| AZOLI_0080 | Horizontally Transferred (high confidence) | AZOBR_10073 | Horizontally Transferred (high confidence)   |
| AZOLI_0081 | Ancestral (high confidence)                | AZOBR_10074 | Ancestral (medium confidence)                |
| AZOLI_0082 | Ancestral (medium confidence)              | AZOBR_10075 | Ancestral (low confidence)                   |
| AZOLI_0083 | Ancestral (medium confidence)              | AZOBR_10076 | Ancestral (medium confidence)                |
| AZOLI_0084 | Ancestral (medium confidence)              | AZOBR_10077 | Horizontally Transferred (high confidence)   |
| AZOLI_0085 | Ancestral (medium confidence)              | AZOBR_10078 | Unassigned                                   |
| AZOLI_0086 | Ancestral (medium confidence)              | AZOBR_10079 | Ancestral (medium confidence)                |
| AZOLI_0087 | Ancestral (medium confidence)              | AZOBR_10080 | Horizontally Transferred (high confidence)   |
| AZOLI_0088 | Ancestral (high confidence)                | AZOBR_10081 | Horizontally Transferred (high confidence)   |
| AZOLI_0089 | Ancestral (medium confidence)              | AZOBR_10082 | Horizontally Transferred (high confidence)   |
| AZOLI_0090 | Ancestral (medium confidence)              | AZOBR_10083 | Horizontally Transferred (high confidence)   |
| AZOLI_0091 | Ancestral (high confidence)                | AZOBR_10084 | Horizontally Transferred (high confidence)   |
| AZOLI_0092 | Ancestral (medium confidence)              | AZOBR_10085 | Unassigned                                   |
| AZOLI_0093 | Horizontally Transferred (low confidence)  | AZOBR_10086 | Unassigned                                   |
| AZOLI_0094 | Ancestral (low confidence)                 | AZOBR_10087 | Unassigned                                   |
| AZOLI_0095 | Ancestral (high confidence)                | AZOBR_10088 | Ancestral (medium confidence)                |
| AZOLI_0096 | Ancestral (high confidence)                | AZOBR_10089 | Ancestral (high confidence)                  |
| AZOLI_0097 | Horizontally Transferred (high confidence) | AZOBR_10090 | Ancestral (high confidence)                  |
| AZOLI_0098 | Unassigned                                 | AZOBR_10091 | Horizontally Transferred (medium confidence) |
| AZOLI_0101 | Unassigned                                 | AZOBR_10092 | Unassigned                                   |
| AZOLI_0104 | Unassigned                                 | AZOBR_10093 | Horizontally Transferred (high confidence)   |
| AZOLI_0105 | Unassigned                                 | AZOBR_10094 | Ancestral (medium confidence)                |
| AZOLI_0106 | Unassigned                                 | AZOBR_10095 | Horizontally Transferred (high confidence)   |
| AZOLI_0107 | Ancestral (high confidence)                | AZOBR_10096 | Ancestral (medium confidence)                |
| AZOLI_0108 | Ancestral (high confidence)                | AZOBR_10097 | Ancestral (low confidence)                   |
| AZOLI_0109 | Ancestral (high confidence)                | AZOBR_10098 | Unassigned                                   |
| AZOLI_0110 | Unassigned                                 | AZOBR_10099 | Horizontally Transferred (high confidence)   |
| AZOLI_0111 | Ancestral (low confidence)                 | AZOBR_10100 | Horizontally Transferred (high confidence)   |
| AZOLI_0112 | Horizontally Transferred (high confidence) | AZOBR_10101 | Horizontally Transferred (high confidence)   |
| AZOLI_0113 | Horizontally Transferred (high confidence) | AZOBR_10102 | Ancestral (medium confidence)                |
| AZOLI_0114 | Horizontally Transferred (high confidence) | AZOBR_10103 | Ancestral (high confidence)                  |
| AZOLI_0115 | Horizontally Transferred (high confidence) | AZOBR_10104 | Ancestral (medium confidence)                |
| AZOLI_0116 | Horizontally Transferred (high confidence) | AZOBR_10105 | Ancestral (medium confidence)                |
| AZOLI_0117 | Horizontally Transferred (high confidence) | AZOBR_10106 | Unassigned                                   |
| AZOLI_0118 | Ancestral (high confidence)                | AZOBR_10107 | Ancestral (medium confidence)                |
| AZOLI_0119 | Horizontally Transferred (high confidence) | AZOBR_10108 | Ancestral (high confidence)                  |
| AZOLI_0120 | Horizontally Transferred (high confidence) | AZOBR_10109 | Ancestral (high confidence)                  |
| AZOLI_0121 | Ancestral (low confidence)                 | AZOBR_10110 | Horizontally Transferred (high confidence)   |
| AZOLI_0122 | Ancestral (medium confidence)              | AZOBR_10111 | Ancestral (medium confidence)                |
| AZOLI_0123 | Unassigned                                 | AZOBR_10112 | Ancestral (medium confidence)                |
| AZOLI_0124 | Ancestral (medium confidence)              | AZOBR_10113 | Ancestral (medium confidence)                |
| AZOLI_0125 | Horizontally Transferred (high confidence) | AZOBR_10114 | Ancestral (high confidence)                  |
| AZOLI_0126 | Horizontally Transferred (high confidence) | AZOBR_10115 | Ancestral (medium confidence)                |
| AZOLI_0129 | Unassigned                                 | AZOBR_10116 | Ancestral (high confidence)                  |
| AZOLI_0130 | Horizontally Transferred (high confidence) | AZOBR_10117 | Ancestral (high confidence)                  |
| AZOLI_0131 | Unassigned                                 | AZOBR_10118 | Ancestral (medium confidence)                |
| AZOLI_0132 | Ancestral (medium confidence)              | AZOBR_10119 | Ancestral (high confidence)                  |
| AZOLI_0133 | Ancestral (medium confidence)              | AZOBR_10120 | Ancestral (high confidence)                  |
| AZOLI_0134 | Ancestral (low confidence)                 | AZOBR_10121 | Ancestral (high confidence)                  |
| AZOLI_0135 | Ancestral (medium confidence)              | AZOBR_10122 | Ancestral (high confidence)                  |
| AZOLI_0136 | Ancestral (medium confidence)              | AZOBR_10123 | Ancestral (high confidence)                  |
| AZOLI_0137 | Ancestral (high confidence)                | AZOBR_10124 | Ancestral (high confidence)                  |
| AZOLI_0138 | Ancestral (low confidence)                 | AZOBR_10125 | Ancestral (medium confidence)                |
| AZOLI_0139 | Horizontally Transferred (high confidence) | AZOBR_10126 | Unassigned                                   |
| AZOLI_0140 | Ancestral (high confidence)                | AZOBR_10127 | Ancestral (medium confidence)                |
| AZOLI_0141 | Ancestral (high confidence)                | AZOBR_10128 | Ancestral (high confidence)                  |
| AZOLI_0142 | Ancestral (medium confidence)              | AZOBR_10129 | Ancestral (low confidence)                   |
| AZOLI_0143 | Horizontally Transferred (high confidence) | AZOBR_10130 | Ancestral (high confidence)                  |
| AZOLI_0144 | Ancestral (low confidence)                 | AZOBR_10131 | Unassigned                                   |
| AZOLI_0145 | Ancestral (low confidence)                 | AZOBR_10132 | Horizontally Transferred (high confidence)   |
| AZOLI_0146 | Unassigned                                 | AZOBR_10133 | Ancestral (medium confidence)                |
| AZOLI_0147 | Ancestral (low confidence)                 | AZOBR_10134 | Horizontally Transferred (high confidence)   |
| AZOLI_0148 | Ancestral (medium confidence)              | AZOBR_10135 | Ancestral (high confidence)                  |
| AZOLI_0149 | Ancestral (medium confidence)              | AZOBR_10136 | Ancestral (medium confidence)                |
| AZOLI_0150 | Ancestral (low confidence)                 | AZOBR_10137 | Unassigned                                   |
| AZOLI_0151 | Unassigned                                 | AZOBR_10138 | Ancestral (low confidence)                   |
| AZOLI_0152 | Ancestral (low confidence)                 | AZOBR_10139 | Ancestral (medium confidence)                |
| AZOLI_0153 | Ancestral (low confidence)                 | AZOBR_10140 | Ancestral (medium confidence)                |
| AZOLI_0154 | Unassigned                                 | AZOBR_10141 | Ancestral (medium confidence)                |
| AZOLI_0155 | Ancestral (high confidence)                | AZOBR_10142 | Ancestral (medium confidence)                |
| AZOLI_0156 | Ancestral (medium confidence)              | AZOBR_10143 | Horizontally Transferred (high confidence)   |

|            |                                            |             |                                            |
|------------|--------------------------------------------|-------------|--------------------------------------------|
| AZOLI_0157 | Horizontally Transferred (low confidence)  | AZOBR_10144 | Horizontally Transferred (high confidence) |
| AZOLI_0158 | Horizontally Transferred (high confidence) | AZOBR_10145 | Unassigned                                 |
| AZOLI_0159 | Ancestral (medium confidence)              | AZOBR_10146 | Ancestral (high confidence)                |
| AZOLI_0160 | Ancestral (medium confidence)              | AZOBR_10147 | Ancestral (medium confidence)              |
| AZOLI_0161 | Ancestral (low confidence)                 | AZOBR_10148 | Horizontally Transferred (high confidence) |
| AZOLI_0162 | Ancestral (low confidence)                 | AZOBR_10149 | Unassigned                                 |
| AZOLI_0163 | Horizontally Transferred (high confidence) | AZOBR_10150 | Unassigned                                 |
| AZOLI_0164 | Ancestral (high confidence)                | AZOBR_10151 | Ancestral (high confidence)                |
| AZOLI_0165 | Ancestral (medium confidence)              | AZOBR_10152 | Ancestral (high confidence)                |
| AZOLI_0166 | Ancestral (high confidence)                | AZOBR_10153 | Ancestral (high confidence)                |
| AZOLI_0167 | Horizontally Transferred (high confidence) | AZOBR_10154 | Ancestral (high confidence)                |
| AZOLI_0168 | Horizontally Transferred (high confidence) | AZOBR_10155 | Ancestral (medium confidence)              |
| AZOLI_0170 | Ancestral (high confidence)                | AZOBR_10156 | Ancestral (medium confidence)              |
| AZOLI_0172 | Ancestral (high confidence)                | AZOBR_10157 | Ancestral (medium confidence)              |
| AZOLI_0173 | Ancestral (high confidence)                | AZOBR_10158 | Ancestral (low confidence)                 |
| AZOLI_0174 | Ancestral (high confidence)                | AZOBR_10159 | Ancestral (low confidence)                 |
| AZOLI_0176 | Ancestral (low confidence)                 | AZOBR_10160 | Ancestral (low confidence)                 |
| AZOLI_0177 | Unassigned                                 | AZOBR_10161 | Horizontally Transferred (high confidence) |
| AZOLI_0178 | Ancestral (high confidence)                | AZOBR_10162 | Ancestral (high confidence)                |
| AZOLI_0179 | Horizontally Transferred (high confidence) | AZOBR_10163 | Ancestral (high confidence)                |
| AZOLI_0181 | Ancestral (high confidence)                | AZOBR_10164 | Horizontally Transferred (high confidence) |
| AZOLI_0182 | Ancestral (low confidence)                 | AZOBR_10165 | Horizontally Transferred (high confidence) |
| AZOLI_0183 | Unassigned                                 | AZOBR_10166 | Ancestral (high confidence)                |
| AZOLI_0184 | Unassigned                                 | AZOBR_10167 | Ancestral (medium confidence)              |
| AZOLI_0186 | Unassigned                                 | AZOBR_10168 | Ancestral (high confidence)                |
| AZOLI_0188 | Unassigned                                 | AZOBR_10169 | Ancestral (high confidence)                |
| AZOLI_0190 | Ancestral (medium confidence)              | AZOBR_10170 | Unassigned                                 |
| AZOLI_0191 | Ancestral (low confidence)                 | AZOBR_10171 | Ancestral (low confidence)                 |
| AZOLI_0192 | Ancestral (medium confidence)              | AZOBR_10172 | Ancestral (medium confidence)              |
| AZOLI_0193 | Ancestral (medium confidence)              | AZOBR_10173 | Ancestral (low confidence)                 |
| AZOLI_0194 | Ancestral (medium confidence)              | AZOBR_10174 | Horizontally Transferred (high confidence) |
| AZOLI_0195 | Ancestral (medium confidence)              | AZOBR_10175 | Ancestral (low confidence)                 |
| AZOLI_0196 | Ancestral (medium confidence)              | AZOBR_10176 | Ancestral (medium confidence)              |
| AZOLI_0197 | Horizontally Transferred (high confidence) | AZOBR_10177 | Unassigned                                 |
| AZOLI_0198 | Unassigned                                 | AZOBR_10178 | Ancestral (medium confidence)              |
| AZOLI_0199 | Ancestral (medium confidence)              | AZOBR_10179 | Ancestral (medium confidence)              |
| AZOLI_0200 | Horizontally Transferred (high confidence) | AZOBR_10180 | Ancestral (medium confidence)              |
| AZOLI_0201 | Unassigned                                 | AZOBR_10181 | Horizontally Transferred (high confidence) |
| AZOLI_0202 | Horizontally Transferred (high confidence) | AZOBR_10182 | Unassigned                                 |
| AZOLI_0203 | Ancestral (low confidence)                 | AZOBR_10183 | Horizontally Transferred (high confidence) |
| AZOLI_0204 | Ancestral (high confidence)                | AZOBR_10184 | Horizontally Transferred (high confidence) |
| AZOLI_0205 | Ancestral (high confidence)                | AZOBR_10185 | Horizontally Transferred (high confidence) |
| AZOLI_0206 | Ancestral (high confidence)                | AZOBR_10186 | Ancestral (medium confidence)              |
| AZOLI_0207 | Ancestral (low confidence)                 | AZOBR_10187 | Unassigned                                 |
| AZOLI_0208 | Horizontally Transferred (high confidence) | AZOBR_10188 | Unassigned                                 |
| AZOLI_0209 | Ancestral (high confidence)                | AZOBR_10189 | Ancestral (high confidence)                |
| AZOLI_0210 | Horizontally Transferred (high confidence) | AZOBR_10190 | Ancestral (high confidence)                |
| AZOLI_0211 | Unassigned                                 | AZOBR_10191 | Ancestral (high confidence)                |
| AZOLI_0212 | Ancestral (high confidence)                | AZOBR_10192 | Ancestral (high confidence)                |
| AZOLI_0213 | Ancestral (low confidence)                 | AZOBR_10193 | Unassigned                                 |
| AZOLI_0214 | Horizontally Transferred (high confidence) | AZOBR_10194 | Ancestral (low confidence)                 |
| AZOLI_0215 | Horizontally Transferred (high confidence) | AZOBR_10195 | Ancestral (medium confidence)              |
| AZOLI_0216 | Ancestral (low confidence)                 | AZOBR_10196 | Ancestral (medium confidence)              |
| AZOLI_0217 | Ancestral (low confidence)                 | AZOBR_10197 | Ancestral (medium confidence)              |
| AZOLI_0218 | Ancestral (high confidence)                | AZOBR_10198 | Ancestral (low confidence)                 |
| AZOLI_0219 | Ancestral (high confidence)                | AZOBR_10199 | Unassigned                                 |
| AZOLI_0220 | Ancestral (high confidence)                | AZOBR_10200 | Unassigned                                 |
| AZOLI_0221 | Ancestral (medium confidence)              | AZOBR_10201 | Ancestral (high confidence)                |
| AZOLI_0222 | Ancestral (low confidence)                 | AZOBR_10202 | Ancestral (high confidence)                |
| AZOLI_0223 | Unassigned                                 | AZOBR_10203 | Unassigned                                 |
| AZOLI_0224 | Unassigned                                 | AZOBR_10204 | Ancestral (medium confidence)              |
| AZOLI_0225 | Unassigned                                 | AZOBR_10205 | Unassigned                                 |
| AZOLI_0226 | Ancestral (medium confidence)              | AZOBR_10206 | Horizontally Transferred (high confidence) |
| AZOLI_0227 | Ancestral (high confidence)                | AZOBR_10207 | Horizontally Transferred (high confidence) |
| AZOLI_0229 | Ancestral (high confidence)                | AZOBR_10208 | Ancestral (low confidence)                 |
| AZOLI_0230 | Ancestral (medium confidence)              | AZOBR_10209 | Ancestral (medium confidence)              |
| AZOLI_0231 | Ancestral (high confidence)                | AZOBR_10210 | Horizontally Transferred (high confidence) |
| AZOLI_0232 | Horizontally Transferred (high confidence) | AZOBR_10211 | Ancestral (medium confidence)              |
| AZOLI_0233 | Ancestral (high confidence)                | AZOBR_10212 | Ancestral (high confidence)                |
| AZOLI_0234 | Ancestral (medium confidence)              | AZOBR_10213 | Horizontally Transferred (high confidence) |
| AZOLI_0235 | Ancestral (medium confidence)              | AZOBR_10214 | Ancestral (medium confidence)              |
| AZOLI_0236 | Ancestral (high confidence)                | AZOBR_10215 | Ancestral (high confidence)                |
| AZOLI_0237 | Ancestral (low confidence)                 | AZOBR_10216 | Ancestral (high confidence)                |
| AZOLI_0238 | Ancestral (low confidence)                 | AZOBR_10217 | Ancestral (low confidence)                 |
| AZOLI_0239 | Unassigned                                 | AZOBR_10218 | Ancestral (high confidence)                |

|            |                                              |             |                                            |
|------------|----------------------------------------------|-------------|--------------------------------------------|
| AZOLI_0240 | Horizontally Transferred (high confidence)   | AZOBR_10219 | Unassigned                                 |
| AZOLI_0241 | Ancestral (low confidence)                   | AZOBR_10220 | Horizontally Transferred (high confidence) |
| AZOLI_0242 | Ancestral (low confidence)                   | AZOBR_10221 | Ancestral (low confidence)                 |
| AZOLI_0243 | Ancestral (low confidence)                   | AZOBR_10222 | Horizontally Transferred (high confidence) |
| AZOLI_0244 | Ancestral (low confidence)                   | AZOBR_10223 | Ancestral (high confidence)                |
| AZOLI_0245 | Unassigned                                   | AZOBR_10224 | Ancestral (low confidence)                 |
| AZOLI_0246 | Horizontally Transferred (high confidence)   | AZOBR_10225 | Ancestral (low confidence)                 |
| AZOLI_0247 | Horizontally Transferred (high confidence)   | AZOBR_10226 | Ancestral (low confidence)                 |
| AZOLI_0248 | Horizontally Transferred (high confidence)   | AZOBR_10227 | Ancestral (low confidence)                 |
| AZOLI_0249 | Unassigned                                   | AZOBR_10228 | Ancestral (medium confidence)              |
| AZOLI_0251 | Horizontally Transferred (high confidence)   | AZOBR_10229 | Ancestral (medium confidence)              |
| AZOLI_0252 | Ancestral (medium confidence)                | AZOBR_10230 | Unassigned                                 |
| AZOLI_0253 | Ancestral (high confidence)                  | AZOBR_10231 | Ancestral (low confidence)                 |
| AZOLI_0254 | Ancestral (high confidence)                  | AZOBR_10232 | Unassigned                                 |
| AZOLI_0255 | Ancestral (medium confidence)                | AZOBR_10233 | Ancestral (high confidence)                |
| AZOLI_0256 | Ancestral (high confidence)                  | AZOBR_10234 | Ancestral (low confidence)                 |
| AZOLI_0257 | Ancestral (medium confidence)                | AZOBR_10235 | Ancestral (high confidence)                |
| AZOLI_0258 | Horizontally Transferred (high confidence)   | AZOBR_10236 | Ancestral (high confidence)                |
| AZOLI_0259 | Ancestral (low confidence)                   | AZOBR_10237 | Horizontally Transferred (high confidence) |
| AZOLI_0260 | Ancestral (low confidence)                   | AZOBR_10238 | Ancestral (medium confidence)              |
| AZOLI_0261 | Ancestral (low confidence)                   | AZOBR_10239 | Ancestral (high confidence)                |
| AZOLI_0262 | Ancestral (low confidence)                   | AZOBR_10240 | Horizontally Transferred (high confidence) |
| AZOLI_0263 | Ancestral (medium confidence)                | AZOBR_10241 | Ancestral (high confidence)                |
| AZOLI_0264 | Ancestral (medium confidence)                | AZOBR_10242 | Ancestral (high confidence)                |
| AZOLI_0265 | Ancestral (medium confidence)                | AZOBR_10243 | Ancestral (medium confidence)              |
| AZOLI_0266 | Ancestral (low confidence)                   | AZOBR_10244 | Ancestral (medium confidence)              |
| AZOLI_0268 | Horizontally Transferred (high confidence)   | AZOBR_10245 | Ancestral (high confidence)                |
| AZOLI_0269 | Ancestral (high confidence)                  | AZOBR_10246 | Ancestral (high confidence)                |
| AZOLI_0270 | Ancestral (medium confidence)                | AZOBR_10247 | Ancestral (high confidence)                |
| AZOLI_0271 | Ancestral (medium confidence)                | AZOBR_10248 | Horizontally Transferred (high confidence) |
| AZOLI_0272 | Ancestral (high confidence)                  | AZOBR_10249 | Ancestral (high confidence)                |
| AZOLI_0274 | Ancestral (high confidence)                  | AZOBR_10250 | Unassigned                                 |
| AZOLI_0275 | Ancestral (medium confidence)                | AZOBR_10251 | Ancestral (high confidence)                |
| AZOLI_0276 | Ancestral (high confidence)                  | AZOBR_10252 | Ancestral (medium confidence)              |
| AZOLI_0277 | Ancestral (high confidence)                  | AZOBR_10253 | Ancestral (high confidence)                |
| AZOLI_0278 | Unassigned                                   | AZOBR_10254 | Ancestral (high confidence)                |
| AZOLI_0279 | Ancestral (high confidence)                  | AZOBR_10255 | Ancestral (low confidence)                 |
| AZOLI_0280 | Horizontally Transferred (high confidence)   | AZOBR_10256 | Ancestral (medium confidence)              |
| AZOLI_0281 | Ancestral (high confidence)                  | AZOBR_10257 | Horizontally Transferred (high confidence) |
| AZOLI_0282 | Ancestral (medium confidence)                | AZOBR_10258 | Ancestral (high confidence)                |
| AZOLI_0283 | Horizontally Transferred (medium confidence) | AZOBR_10259 | Ancestral (high confidence)                |
| AZOLI_0284 | Unassigned                                   | AZOBR_10260 | Unassigned                                 |
| AZOLI_0285 | Ancestral (medium confidence)                | AZOBR_10261 | Ancestral (high confidence)                |
| AZOLI_0286 | Unassigned                                   | AZOBR_10262 | Ancestral (high confidence)                |
| AZOLI_0287 | Horizontally Transferred (high confidence)   | AZOBR_10263 | Ancestral (medium confidence)              |
| AZOLI_0288 | Ancestral (high confidence)                  | AZOBR_10264 | Ancestral (low confidence)                 |
| AZOLI_0290 | Ancestral (medium confidence)                | AZOBR_10265 | Unassigned                                 |
| AZOLI_0292 | Horizontally Transferred (medium confidence) | AZOBR_10266 | Ancestral (high confidence)                |
| AZOLI_0293 | Horizontally Transferred (high confidence)   | AZOBR_10267 | Ancestral (medium confidence)              |
| AZOLI_0294 | Ancestral (high confidence)                  | AZOBR_10268 | Unassigned                                 |
| AZOLI_0295 | Ancestral (high confidence)                  | AZOBR_10269 | Ancestral (low confidence)                 |
| AZOLI_0296 | Ancestral (medium confidence)                | AZOBR_10270 | Ancestral (low confidence)                 |
| AZOLI_0297 | Ancestral (high confidence)                  | AZOBR_10271 | Unassigned                                 |
| AZOLI_0298 | Ancestral (high confidence)                  | AZOBR_10272 | Unassigned                                 |
| AZOLI_0299 | Ancestral (medium confidence)                | AZOBR_10273 | Ancestral (low confidence)                 |
| AZOLI_0301 | Ancestral (high confidence)                  | AZOBR_10274 | Horizontally Transferred (high confidence) |
| AZOLI_0302 | Unassigned                                   | AZOBR_10275 | Ancestral (low confidence)                 |
| AZOLI_0303 | Ancestral (medium confidence)                | AZOBR_10276 | Ancestral (low confidence)                 |
| AZOLI_0304 | Unassigned                                   | AZOBR_10277 | Ancestral (high confidence)                |
| AZOLI_0305 | Horizontally Transferred (high confidence)   | AZOBR_10278 | Unassigned                                 |
| AZOLI_0306 | Horizontally Transferred (high confidence)   | AZOBR_10279 | Ancestral (medium confidence)              |
| AZOLI_0307 | Unassigned                                   | AZOBR_10280 | Ancestral (high confidence)                |
| AZOLI_0308 | Ancestral (medium confidence)                | AZOBR_10281 | Ancestral (high confidence)                |
| AZOLI_0309 | Ancestral (high confidence)                  | AZOBR_10282 | Ancestral (high confidence)                |
| AZOLI_0311 | Horizontally Transferred (high confidence)   | AZOBR_10283 | Ancestral (low confidence)                 |
| AZOLI_0312 | Horizontally Transferred (high confidence)   | AZOBR_10284 | Ancestral (medium confidence)              |
| AZOLI_0313 | Ancestral (medium confidence)                | AZOBR_10285 | Ancestral (high confidence)                |
| AZOLI_0314 | Ancestral (high confidence)                  | AZOBR_10286 | Ancestral (high confidence)                |
| AZOLI_0315 | Ancestral (high confidence)                  | AZOBR_10287 | Ancestral (low confidence)                 |
| AZOLI_0316 | Horizontally Transferred (high confidence)   | AZOBR_10288 | Ancestral (medium confidence)              |
| AZOLI_0317 | Ancestral (medium confidence)                | AZOBR_10289 | Ancestral (high confidence)                |
| AZOLI_0318 | Ancestral (medium confidence)                | AZOBR_10290 | Ancestral (low confidence)                 |
| AZOLI_0319 | Ancestral (low confidence)                   | AZOBR_10291 | Ancestral (medium confidence)              |
| AZOLI_0320 | Ancestral (low confidence)                   | AZOBR_10292 | Ancestral (low confidence)                 |
| AZOLI_0321 | Ancestral (low confidence)                   | AZOBR_10293 | Ancestral (high confidence)                |







|            |                                              |             |                                              |
|------------|----------------------------------------------|-------------|----------------------------------------------|
| AZOLI_0578 | Ancestral (high confidence)                  | AZOBR_10519 | Ancestral (medium confidence)                |
| AZOLI_0579 | Ancestral (high confidence)                  | AZOBR_10520 | Ancestral (low confidence)                   |
| AZOLI_0580 | Unassigned                                   | AZOBR_10521 | Ancestral (low confidence)                   |
| AZOLI_0581 | Unassigned                                   | AZOBR_10522 | Unassigned                                   |
| AZOLI_0583 | Unassigned                                   | AZOBR_10523 | Ancestral (medium confidence)                |
| AZOLI_0584 | Horizontally Transferred (low confidence)    | AZOBR_10524 | Ancestral (low confidence)                   |
| AZOLI_0585 | Ancestral (low confidence)                   | AZOBR_10525 | Ancestral (low confidence)                   |
| AZOLI_0586 | Ancestral (high confidence)                  | AZOBR_10526 | Ancestral (high confidence)                  |
| AZOLI_0587 | Horizontally Transferred (high confidence)   | AZOBR_10527 | Ancestral (medium confidence)                |
| AZOLI_0588 | Ancestral (high confidence)                  | AZOBR_10528 | Ancestral (medium confidence)                |
| AZOLI_0589 | Ancestral (low confidence)                   | AZOBR_10529 | Unassigned                                   |
| AZOLI_0590 | Ancestral (medium confidence)                | AZOBR_10530 | Unassigned                                   |
| AZOLI_0591 | Ancestral (high confidence)                  | AZOBR_10531 | Ancestral (medium confidence)                |
| AZOLI_0592 | Ancestral (low confidence)                   | AZOBR_10532 | Ancestral (medium confidence)                |
| AZOLI_0593 | Ancestral (low confidence)                   | AZOBR_10533 | Unassigned                                   |
| AZOLI_0595 | Ancestral (low confidence)                   | AZOBR_10534 | Horizontally Transferred (medium confidence) |
| AZOLI_0596 | Ancestral (low confidence)                   | AZOBR_10535 | Ancestral (medium confidence)                |
| AZOLI_0597 | Ancestral (high confidence)                  | AZOBR_10536 | Ancestral (low confidence)                   |
| AZOLI_0598 | Ancestral (high confidence)                  | AZOBR_10537 | Ancestral (medium confidence)                |
| AZOLI_0599 | Ancestral (high confidence)                  | AZOBR_10538 | Horizontally Transferred (high confidence)   |
| AZOLI_0600 | Horizontally Transferred (high confidence)   | AZOBR_10539 | Ancestral (medium confidence)                |
| AZOLI_0601 | Horizontally Transferred (high confidence)   | AZOBR_10540 | Ancestral (medium confidence)                |
| AZOLI_0602 | Ancestral (low confidence)                   | AZOBR_20001 | Horizontally Transferred (high confidence)   |
| AZOLI_0604 | Horizontally Transferred (high confidence)   | AZOBR_20002 | Ancestral (low confidence)                   |
| AZOLI_0605 | Ancestral (high confidence)                  | AZOBR_20003 | Ancestral (low confidence)                   |
| AZOLI_0606 | Ancestral (high confidence)                  | AZOBR_20004 | Horizontally Transferred (medium confidence) |
| AZOLI_0607 | Ancestral (high confidence)                  | AZOBR_20005 | Ancestral (medium confidence)                |
| AZOLI_0608 | Ancestral (high confidence)                  | AZOBR_20006 | Unassigned                                   |
| AZOLI_0609 | Ancestral (high confidence)                  | AZOBR_20007 | Ancestral (high confidence)                  |
| AZOLI_0610 | Horizontally Transferred (high confidence)   | AZOBR_20008 | Ancestral (medium confidence)                |
| AZOLI_0611 | Horizontally Transferred (high confidence)   | AZOBR_20009 | Ancestral (medium confidence)                |
| AZOLI_0612 | Unassigned                                   | AZOBR_20010 | Ancestral (medium confidence)                |
| AZOLI_0613 | Horizontally Transferred (high confidence)   | AZOBR_20011 | Ancestral (medium confidence)                |
| AZOLI_0614 | Horizontally Transferred (high confidence)   | AZOBR_20012 | Ancestral (low confidence)                   |
| AZOLI_0615 | Unassigned                                   | AZOBR_20013 | Ancestral (low confidence)                   |
| AZOLI_0616 | Horizontally Transferred (high confidence)   | AZOBR_20014 | Unassigned                                   |
| AZOLI_0617 | Ancestral (medium confidence)                | AZOBR_20015 | Unassigned                                   |
| AZOLI_0618 | Horizontally Transferred (low confidence)    | AZOBR_20016 | Ancestral (high confidence)                  |
| AZOLI_0619 | Unassigned                                   | AZOBR_20017 | Horizontally Transferred (medium confidence) |
| AZOLI_0620 | Ancestral (medium confidence)                | AZOBR_20018 | Unassigned                                   |
| AZOLI_0621 | Ancestral (medium confidence)                | AZOBR_20019 | Ancestral (low confidence)                   |
| AZOLI_0622 | Ancestral (high confidence)                  | AZOBR_20020 | Ancestral (low confidence)                   |
| AZOLI_0623 | Ancestral (high confidence)                  | AZOBR_20021 | Ancestral (medium confidence)                |
| AZOLI_0624 | Ancestral (low confidence)                   | AZOBR_20022 | Ancestral (medium confidence)                |
| AZOLI_0625 | Horizontally Transferred (high confidence)   | AZOBR_20023 | Ancestral (high confidence)                  |
| AZOLI_0626 | Horizontally Transferred (medium confidence) | AZOBR_20024 | Horizontally Transferred (high confidence)   |
| AZOLI_0627 | Ancestral (medium confidence)                | AZOBR_20025 | Ancestral (low confidence)                   |
| AZOLI_0628 | Ancestral (medium confidence)                | AZOBR_20026 | Horizontally Transferred (high confidence)   |
| AZOLI_0629 | Ancestral (medium confidence)                | AZOBR_20027 | Ancestral (low confidence)                   |
| AZOLI_0630 | Unassigned                                   | AZOBR_20028 | Ancestral (low confidence)                   |
| AZOLI_0631 | Ancestral (low confidence)                   | AZOBR_20029 | Ancestral (low confidence)                   |
| AZOLI_0632 | Ancestral (medium confidence)                | AZOBR_20030 | Unassigned                                   |
| AZOLI_0633 | Unassigned                                   | AZOBR_20031 | Ancestral (medium confidence)                |
| AZOLI_0634 | Ancestral (medium confidence)                | AZOBR_20032 | Horizontally Transferred (high confidence)   |
| AZOLI_0635 | Ancestral (medium confidence)                | AZOBR_20033 | Horizontally Transferred (high confidence)   |
| AZOLI_0636 | Horizontally Transferred (high confidence)   | AZOBR_20034 | Unassigned                                   |
| AZOLI_0637 | Ancestral (medium confidence)                | AZOBR_30001 | Ancestral (high confidence)                  |
| AZOLI_0638 | Ancestral (low confidence)                   | AZOBR_30002 | Ancestral (medium confidence)                |
| AZOLI_0639 | Ancestral (low confidence)                   | AZOBR_30003 | Unassigned                                   |
| AZOLI_0640 | Unassigned                                   | AZOBR_30004 | Horizontally Transferred (medium confidence) |
| AZOLI_0641 | Ancestral (high confidence)                  | AZOBR_30005 | Ancestral (medium confidence)                |
| AZOLI_0642 | Ancestral (high confidence)                  | AZOBR_30006 | Unassigned                                   |
| AZOLI_0643 | Ancestral (medium confidence)                | AZOBR_30007 | Horizontally Transferred (high confidence)   |
| AZOLI_0644 | Ancestral (medium confidence)                | AZOBR_30008 | Ancestral (low confidence)                   |
| AZOLI_0645 | Ancestral (high confidence)                  | AZOBR_30009 | Ancestral (low confidence)                   |
| AZOLI_0647 | Ancestral (high confidence)                  | AZOBR_30010 | Ancestral (low confidence)                   |
| AZOLI_0648 | Ancestral (medium confidence)                | AZOBR_30011 | Ancestral (medium confidence)                |
| AZOLI_0649 | Ancestral (high confidence)                  | AZOBR_30012 | Ancestral (medium confidence)                |
| AZOLI_0651 | Unassigned                                   | AZOBR_30013 | Horizontally Transferred (high confidence)   |
| AZOLI_0652 | Ancestral (low confidence)                   | AZOBR_30014 | Horizontally Transferred (high confidence)   |
| AZOLI_0653 | Ancestral (low confidence)                   | AZOBR_30015 | Horizontally Transferred (high confidence)   |
| AZOLI_0654 | Ancestral (low confidence)                   | AZOBR_30016 | Horizontally Transferred (high confidence)   |
| AZOLI_0655 | Ancestral (low confidence)                   | AZOBR_30017 | Unassigned                                   |
| AZOLI_0656 | Ancestral (high confidence)                  | AZOBR_30018 | Ancestral (medium confidence)                |
| AZOLI_0657 | Ancestral (high confidence)                  | AZOBR_30019 | Ancestral (low confidence)                   |



|            |                                              |             |                                              |
|------------|----------------------------------------------|-------------|----------------------------------------------|
| AZOLI_0658 | Ancestral (high confidence)                  | AZOBR_30020 | Ancestral (low confidence)                   |
| AZOLI_0659 | Ancestral (medium confidence)                | AZOBR_30021 | Unassigned                                   |
| AZOLI_0660 | Horizontally Transferred (high confidence)   | AZOBR_30022 | Horizontally Transferred (high confidence)   |
| AZOLI_0661 | Horizontally Transferred (medium confidence) | AZOBR_30023 | Unassigned                                   |
| AZOLI_0662 | Ancestral (medium confidence)                | AZOBR_30024 | Ancestral (medium confidence)                |
| AZOLI_0663 | Ancestral (high confidence)                  | AZOBR_30025 | Horizontally Transferred (medium confidence) |
| AZOLI_0664 | Ancestral (high confidence)                  | AZOBR_30026 | Horizontally Transferred (high confidence)   |
| AZOLI_0665 | Ancestral (high confidence)                  | AZOBR_30027 | Horizontally Transferred (high confidence)   |
| AZOLI_0666 | Ancestral (high confidence)                  | AZOBR_30028 | Horizontally Transferred (medium confidence) |
| AZOLI_0667 | Ancestral (high confidence)                  | AZOBR_30029 | Ancestral (low confidence)                   |
| AZOLI_0669 | Horizontally Transferred (high confidence)   | AZOBR_30030 | Ancestral (low confidence)                   |
| AZOLI_0670 | Unassigned                                   | AZOBR_30031 | Horizontally Transferred (high confidence)   |
| AZOLI_0671 | Ancestral (low confidence)                   | AZOBR_30032 | Horizontally Transferred (high confidence)   |
| AZOLI_0672 | Horizontally Transferred (high confidence)   | AZOBR_30033 | Unassigned                                   |
| AZOLI_0673 | Horizontally Transferred (high confidence)   | AZOBR_30034 | Horizontally Transferred (low confidence)    |
| AZOLI_0674 | Horizontally Transferred (high confidence)   | AZOBR_30035 | Horizontally Transferred (high confidence)   |
| AZOLI_0676 | Unassigned                                   | AZOBR_30036 | Unassigned                                   |
| AZOLI_0677 | Ancestral (high confidence)                  | AZOBR_30037 | Horizontally Transferred (medium confidence) |
| AZOLI_0678 | Ancestral (low confidence)                   | AZOBR_30038 | Horizontally Transferred (high confidence)   |
| AZOLI_0679 | Ancestral (low confidence)                   | AZOBR_30039 | Unassigned                                   |
| AZOLI_0680 | Horizontally Transferred (low confidence)    | AZOBR_30040 | Horizontally Transferred (high confidence)   |
| AZOLI_0681 | Unassigned                                   | AZOBR_30041 | Horizontally Transferred (medium confidence) |
| AZOLI_0683 | Horizontally Transferred (high confidence)   | AZOBR_30042 | Unassigned                                   |
| AZOLI_0684 | Ancestral (high confidence)                  | AZOBR_30043 | Ancestral (medium confidence)                |
| AZOLI_0685 | Ancestral (high confidence)                  | AZOBR_30044 | Ancestral (low confidence)                   |
| AZOLI_0686 | Unassigned                                   | AZOBR_40001 | Ancestral (high confidence)                  |
| AZOLI_0687 | Horizontally Transferred (high confidence)   | AZOBR_40002 | Ancestral (low confidence)                   |
| AZOLI_0688 | Ancestral (low confidence)                   | AZOBR_40003 | Ancestral (high confidence)                  |
| AZOLI_0689 | Ancestral (low confidence)                   | AZOBR_40004 | Unassigned                                   |
| AZOLI_0690 | Ancestral (high confidence)                  | AZOBR_40005 | Unassigned                                   |
| AZOLI_0691 | Ancestral (high confidence)                  | AZOBR_40006 | Unassigned                                   |
| AZOLI_0692 | Ancestral (low confidence)                   | AZOBR_40007 | Unassigned                                   |
| AZOLI_0693 | Ancestral (low confidence)                   | AZOBR_40008 | Unassigned                                   |
| AZOLI_0694 | Ancestral (high confidence)                  | AZOBR_40009 | Horizontally Transferred (high confidence)   |
| AZOLI_0695 | Ancestral (low confidence)                   | AZOBR_40010 | Unassigned                                   |
| AZOLI_0696 | Ancestral (low confidence)                   | AZOBR_40011 | Unassigned                                   |
| AZOLI_0697 | Ancestral (low confidence)                   | AZOBR_40012 | Unassigned                                   |
| AZOLI_0698 | Ancestral (medium confidence)                | AZOBR_40013 | Unassigned                                   |
| AZOLI_0699 | Ancestral (high confidence)                  | AZOBR_40014 | Unassigned                                   |
| AZOLI_0700 | Ancestral (low confidence)                   | AZOBR_40015 | Unassigned                                   |
| AZOLI_0702 | Ancestral (low confidence)                   | AZOBR_40016 | Unassigned                                   |
| AZOLI_0703 | Ancestral (high confidence)                  | AZOBR_40017 | Unassigned                                   |
| AZOLI_0704 | Ancestral (high confidence)                  | AZOBR_40018 | Ancestral (medium confidence)                |
| AZOLI_0705 | Ancestral (low confidence)                   | AZOBR_40019 | Ancestral (low confidence)                   |
| AZOLI_0706 | Ancestral (high confidence)                  | AZOBR_40020 | Unassigned                                   |
| AZOLI_0707 | Ancestral (high confidence)                  | AZOBR_40021 | Horizontally Transferred (high confidence)   |
| AZOLI_0709 | Horizontally Transferred (medium confidence) | AZOBR_40022 | Unassigned                                   |
| AZOLI_0711 | Unassigned                                   | AZOBR_40023 | Unassigned                                   |
| AZOLI_0712 | Ancestral (low confidence)                   | AZOBR_40024 | Unassigned                                   |
| AZOLI_0713 | Ancestral (low confidence)                   | AZOBR_40025 | Unassigned                                   |
| AZOLI_0714 | Horizontally Transferred (low confidence)    | AZOBR_40026 | Unassigned                                   |
| AZOLI_0715 | Ancestral (low confidence)                   | AZOBR_40027 | Unassigned                                   |
| AZOLI_0716 | Ancestral (low confidence)                   | AZOBR_40028 | Horizontally Transferred (low confidence)    |
| AZOLI_0717 | Unassigned                                   | AZOBR_40029 | Unassigned                                   |
| AZOLI_0718 | Horizontally Transferred (high confidence)   | AZOBR_40030 | Unassigned                                   |
| AZOLI_0719 | Horizontally Transferred (high confidence)   | AZOBR_40031 | Unassigned                                   |
| AZOLI_0720 | Unassigned                                   | AZOBR_40032 | Horizontally Transferred (high confidence)   |
| AZOLI_0721 | Horizontally Transferred (high confidence)   | AZOBR_40033 | Unassigned                                   |
| AZOLI_0722 | Unassigned                                   | AZOBR_40034 | Ancestral (low confidence)                   |
| AZOLI_0723 | Unassigned                                   | AZOBR_40035 | Unassigned                                   |
| AZOLI_0724 | Horizontally Transferred (high confidence)   | AZOBR_40036 | Ancestral (medium confidence)                |
| AZOLI_0725 | Horizontally Transferred (high confidence)   | AZOBR_40037 | Ancestral (medium confidence)                |
| AZOLI_0726 | Horizontally Transferred (low confidence)    | AZOBR_40038 | Ancestral (high confidence)                  |
| AZOLI_0727 | Horizontally Transferred (low confidence)    | AZOBR_40039 | Ancestral (high confidence)                  |
| AZOLI_0728 | Ancestral (low confidence)                   | AZOBR_40040 | Ancestral (high confidence)                  |
| AZOLI_0729 | Unassigned                                   | AZOBR_40041 | Ancestral (low confidence)                   |
| AZOLI_0730 | Ancestral (medium confidence)                | AZOBR_40042 | Horizontally Transferred (high confidence)   |
| AZOLI_0731 | Ancestral (low confidence)                   | AZOBR_40043 | Unassigned                                   |
| AZOLI_0732 | Horizontally Transferred (high confidence)   | AZOBR_40044 | Ancestral (high confidence)                  |
| AZOLI_0733 | Horizontally Transferred (medium confidence) | AZOBR_40045 | Horizontally Transferred (high confidence)   |
| AZOLI_0734 | Horizontally Transferred (high confidence)   | AZOBR_40046 | Horizontally Transferred (high confidence)   |
| AZOLI_0735 | Horizontally Transferred (high confidence)   | AZOBR_40047 | Ancestral (low confidence)                   |
| AZOLI_0736 | Horizontally Transferred (high confidence)   | AZOBR_40048 | Ancestral (high confidence)                  |
| AZOLI_0737 | Horizontally Transferred (high confidence)   | AZOBR_40049 | Ancestral (high confidence)                  |
| AZOLI_0738 | Unassigned                                   | AZOBR_40050 | Horizontally Transferred (low confidence)    |

|            |                                              |             |                                            |
|------------|----------------------------------------------|-------------|--------------------------------------------|
| AZOLI_0739 | Ancestral (high confidence)                  | AZOBR_40051 | Ancestral (high confidence)                |
| AZOLI_0740 | Ancestral (medium confidence)                | AZOBR_40052 | Ancestral (medium confidence)              |
| AZOLI_0742 | Unassigned                                   | AZOBR_40053 | Ancestral (high confidence)                |
| AZOLI_0743 | Unassigned                                   | AZOBR_40054 | Ancestral (low confidence)                 |
| AZOLI_0744 | Unassigned                                   | AZOBR_40055 | Unassigned                                 |
| AZOLI_0746 | Ancestral (high confidence)                  | AZOBR_40056 | Ancestral (high confidence)                |
| AZOLI_0747 | Horizontally Transferred (high confidence)   | AZOBR_40057 | Ancestral (high confidence)                |
| AZOLI_0748 | Horizontally Transferred (high confidence)   | AZOBR_40058 | Ancestral (medium confidence)              |
| AZOLI_0750 | Ancestral (medium confidence)                | AZOBR_40059 | Ancestral (low confidence)                 |
| AZOLI_0752 | Ancestral (high confidence)                  | AZOBR_40060 | Ancestral (low confidence)                 |
| AZOLI_0753 | Ancestral (high confidence)                  | AZOBR_40061 | Ancestral (medium confidence)              |
| AZOLI_0754 | Ancestral (high confidence)                  | AZOBR_40062 | Ancestral (medium confidence)              |
| AZOLI_0755 | Ancestral (high confidence)                  | AZOBR_40063 | Ancestral (low confidence)                 |
| AZOLI_0756 | Ancestral (low confidence)                   | AZOBR_40064 | Ancestral (medium confidence)              |
| AZOLI_0758 | Ancestral (low confidence)                   | AZOBR_40065 | Ancestral (medium confidence)              |
| AZOLI_0759 | Ancestral (low confidence)                   | AZOBR_40066 | Ancestral (low confidence)                 |
| AZOLI_0760 | Ancestral (low confidence)                   | AZOBR_40067 | Ancestral (medium confidence)              |
| AZOLI_0761 | Ancestral (low confidence)                   | AZOBR_40068 | Horizontally Transferred (high confidence) |
| AZOLI_0762 | Ancestral (high confidence)                  | AZOBR_40069 | Unassigned                                 |
| AZOLI_0763 | Ancestral (high confidence)                  | AZOBR_40070 | Horizontally Transferred (high confidence) |
| AZOLI_0764 | Ancestral (low confidence)                   | AZOBR_40071 | Ancestral (low confidence)                 |
| AZOLI_0766 | Horizontally Transferred (high confidence)   | AZOBR_40072 | Ancestral (high confidence)                |
| AZOLI_0767 | Horizontally Transferred (high confidence)   | AZOBR_40073 | Unassigned                                 |
| AZOLI_0768 | Horizontally Transferred (high confidence)   | AZOBR_40074 | Ancestral (medium confidence)              |
| AZOLI_0769 | Ancestral (high confidence)                  | AZOBR_40075 | Ancestral (high confidence)                |
| AZOLI_0770 | Horizontally Transferred (high confidence)   | AZOBR_40076 | Horizontally Transferred (high confidence) |
| AZOLI_0771 | Ancestral (low confidence)                   | AZOBR_40077 | Horizontally Transferred (high confidence) |
| AZOLI_0773 | Horizontally Transferred (low confidence)    | AZOBR_40078 | Unassigned                                 |
| AZOLI_0774 | Unassigned                                   | AZOBR_40079 | Unassigned                                 |
| AZOLI_0775 | Ancestral (low confidence)                   | AZOBR_40080 | Unassigned                                 |
| AZOLI_0776 | Ancestral (medium confidence)                | AZOBR_40081 | Ancestral (medium confidence)              |
| AZOLI_0777 | Horizontally Transferred (high confidence)   | AZOBR_40082 | Ancestral (low confidence)                 |
| AZOLI_0779 | Ancestral (high confidence)                  | AZOBR_40083 | Unassigned                                 |
| AZOLI_0781 | Ancestral (medium confidence)                | AZOBR_40084 | Horizontally Transferred (high confidence) |
| AZOLI_0782 | Ancestral (high confidence)                  | AZOBR_40085 | Horizontally Transferred (high confidence) |
| AZOLI_0783 | Ancestral (medium confidence)                | AZOBR_40086 | Ancestral (low confidence)                 |
| AZOLI_0784 | Ancestral (medium confidence)                | AZOBR_40087 | Unassigned                                 |
| AZOLI_0785 | Ancestral (high confidence)                  | AZOBR_40088 | Ancestral (high confidence)                |
| AZOLI_0786 | Horizontally Transferred (medium confidence) | AZOBR_40089 | Horizontally Transferred (high confidence) |
| AZOLI_0787 | Ancestral (medium confidence)                | AZOBR_40090 | Ancestral (high confidence)                |
| AZOLI_0788 | Ancestral (medium confidence)                | AZOBR_40091 | Ancestral (high confidence)                |
| AZOLI_0789 | Ancestral (high confidence)                  | AZOBR_40092 | Ancestral (high confidence)                |
| AZOLI_0791 | Horizontally Transferred (high confidence)   | AZOBR_40093 | Ancestral (medium confidence)              |
| AZOLI_0792 | Horizontally Transferred (high confidence)   | AZOBR_40094 | Ancestral (high confidence)                |
| AZOLI_0793 | Horizontally Transferred (high confidence)   | AZOBR_40095 | Ancestral (high confidence)                |
| AZOLI_0794 | Ancestral (medium confidence)                | AZOBR_40096 | Ancestral (low confidence)                 |
| AZOLI_0795 | Unassigned                                   | AZOBR_40097 | Horizontally Transferred (low confidence)  |
| AZOLI_0796 | Ancestral (high confidence)                  | AZOBR_40098 | Unassigned                                 |
| AZOLI_0797 | Ancestral (high confidence)                  | AZOBR_40099 | Horizontally Transferred (high confidence) |
| AZOLI_0798 | Ancestral (medium confidence)                | AZOBR_40100 | Ancestral (high confidence)                |
| AZOLI_0799 | Ancestral (high confidence)                  | AZOBR_40101 | Ancestral (medium confidence)              |
| AZOLI_0800 | Ancestral (high confidence)                  | AZOBR_40102 | Ancestral (high confidence)                |
| AZOLI_0801 | Ancestral (high confidence)                  | AZOBR_40103 | Ancestral (medium confidence)              |
| AZOLI_0802 | Ancestral (high confidence)                  | AZOBR_40104 | Unassigned                                 |
| AZOLI_0803 | Ancestral (high confidence)                  | AZOBR_40105 | Unassigned                                 |
| AZOLI_0805 | Ancestral (high confidence)                  | AZOBR_40106 | Horizontally Transferred (high confidence) |
| AZOLI_0807 | Ancestral (medium confidence)                | AZOBR_40107 | Horizontally Transferred (high confidence) |
| AZOLI_0808 | Horizontally Transferred (high confidence)   | AZOBR_40108 | Horizontally Transferred (high confidence) |
| AZOLI_0809 | Ancestral (high confidence)                  | AZOBR_40109 | Ancestral (high confidence)                |
| AZOLI_0810 | Ancestral (medium confidence)                | AZOBR_40110 | Ancestral (medium confidence)              |
| AZOLI_0811 | Horizontally Transferred (high confidence)   | AZOBR_40111 | Horizontally Transferred (high confidence) |
| AZOLI_0812 | Ancestral (medium confidence)                | AZOBR_40112 | Horizontally Transferred (high confidence) |
| AZOLI_0813 | Unassigned                                   | AZOBR_40113 | Ancestral (medium confidence)              |
| AZOLI_0814 | Ancestral (medium confidence)                | AZOBR_40114 | Ancestral (high confidence)                |
| AZOLI_0815 | Ancestral (low confidence)                   | AZOBR_40115 | Unassigned                                 |
| AZOLI_0816 | Ancestral (low confidence)                   | AZOBR_40116 | Ancestral (high confidence)                |
| AZOLI_0819 | Unassigned                                   | AZOBR_40117 | Ancestral (medium confidence)              |
| AZOLI_0820 | Horizontally Transferred (high confidence)   | AZOBR_40118 | Ancestral (medium confidence)              |
| AZOLI_0821 | Ancestral (high confidence)                  | AZOBR_40119 | Ancestral (high confidence)                |
| AZOLI_0822 | Ancestral (low confidence)                   | AZOBR_40120 | Ancestral (high confidence)                |
| AZOLI_0823 | Ancestral (high confidence)                  | AZOBR_40121 | Ancestral (high confidence)                |
| AZOLI_0824 | Ancestral (high confidence)                  | AZOBR_40122 | Unassigned                                 |
| AZOLI_0825 | Ancestral (medium confidence)                | AZOBR_40123 | Ancestral (medium confidence)              |
| AZOLI_0826 | Ancestral (high confidence)                  | AZOBR_40124 | Ancestral (high confidence)                |
| AZOLI_0827 | Ancestral (high confidence)                  | AZOBR_40125 | Ancestral (medium confidence)              |



|            |                                              |             |                                              |
|------------|----------------------------------------------|-------------|----------------------------------------------|
| AZOLI_0906 | Horizontally Transferred (medium confidence) | AZOBR_40201 | Ancestral (high confidence)                  |
| AZOLI_0907 | Horizontally Transferred (high confidence)   | AZOBR_40202 | Ancestral (low confidence)                   |
| AZOLI_0909 | Horizontally Transferred (low confidence)    | AZOBR_40203 | Ancestral (medium confidence)                |
| AZOLI_0910 | Horizontally Transferred (low confidence)    | AZOBR_40204 | Unassigned                                   |
| AZOLI_0911 | Horizontally Transferred (low confidence)    | AZOBR_40205 | Ancestral (low confidence)                   |
| AZOLI_0912 | Horizontally Transferred (low confidence)    | AZOBR_40206 | Ancestral (high confidence)                  |
| AZOLI_0913 | Horizontally Transferred (low confidence)    | AZOBR_40207 | Horizontally Transferred (high confidence)   |
| AZOLI_0914 | Horizontally Transferred (low confidence)    | AZOBR_40208 | Ancestral (high confidence)                  |
| AZOLI_0915 | Horizontally Transferred (high confidence)   | AZOBR_40209 | Ancestral (high confidence)                  |
| AZOLI_0916 | Unassigned                                   | AZOBR_40210 | Ancestral (medium confidence)                |
| AZOLI_0917 | Horizontally Transferred (high confidence)   | AZOBR_40211 | Ancestral (low confidence)                   |
| AZOLI_0918 | Horizontally Transferred (medium confidence) | AZOBR_40212 | Unassigned                                   |
| AZOLI_0919 | Horizontally Transferred (high confidence)   | AZOBR_40213 | Horizontally Transferred (high confidence)   |
| AZOLI_0920 | Ancestral (medium confidence)                | AZOBR_40214 | Ancestral (high confidence)                  |
| AZOLI_0921 | Unassigned                                   | AZOBR_40215 | Horizontally Transferred (high confidence)   |
| AZOLI_0922 | Ancestral (low confidence)                   | AZOBR_40216 | Ancestral (medium confidence)                |
| AZOLI_0923 | Ancestral (medium confidence)                | AZOBR_40217 | Unassigned                                   |
| AZOLI_0924 | Horizontally Transferred (high confidence)   | AZOBR_40218 | Ancestral (high confidence)                  |
| AZOLI_0925 | Ancestral (medium confidence)                | AZOBR_40219 | Unassigned                                   |
| AZOLI_0926 | Ancestral (low confidence)                   | AZOBR_40220 | Horizontally Transferred (high confidence)   |
| AZOLI_0927 | Horizontally Transferred (high confidence)   | AZOBR_40221 | Horizontally Transferred (high confidence)   |
| AZOLI_0928 | Ancestral (high confidence)                  | AZOBR_40222 | Unassigned                                   |
| AZOLI_0929 | Ancestral (high confidence)                  | AZOBR_40223 | Ancestral (high confidence)                  |
| AZOLI_0930 | Ancestral (low confidence)                   | AZOBR_40224 | Unassigned                                   |
| AZOLI_0931 | Ancestral (high confidence)                  | AZOBR_40225 | Ancestral (low confidence)                   |
| AZOLI_0932 | Ancestral (high confidence)                  | AZOBR_40226 | Horizontally Transferred (high confidence)   |
| AZOLI_0933 | Horizontally Transferred (high confidence)   | AZOBR_40227 | Ancestral (medium confidence)                |
| AZOLI_0934 | Unassigned                                   | AZOBR_40228 | Ancestral (medium confidence)                |
| AZOLI_0935 | Unassigned                                   | AZOBR_40229 | Ancestral (medium confidence)                |
| AZOLI_0936 | Ancestral (medium confidence)                | AZOBR_40230 | Ancestral (medium confidence)                |
| AZOLI_0937 | Ancestral (low confidence)                   | AZOBR_40231 | Ancestral (low confidence)                   |
| AZOLI_0938 | Horizontally Transferred (high confidence)   | AZOBR_40232 | Ancestral (medium confidence)                |
| AZOLI_0939 | Unassigned                                   | AZOBR_40233 | Ancestral (medium confidence)                |
| AZOLI_0942 | Horizontally Transferred (medium confidence) | AZOBR_40234 | Ancestral (high confidence)                  |
| AZOLI_0943 | Ancestral (low confidence)                   | AZOBR_40235 | Ancestral (low confidence)                   |
| AZOLI_0944 | Horizontally Transferred (high confidence)   | AZOBR_40236 | Unassigned                                   |
| AZOLI_0946 | Ancestral (medium confidence)                | AZOBR_40237 | Horizontally Transferred (high confidence)   |
| AZOLI_0947 | Ancestral (medium confidence)                | AZOBR_40238 | Horizontally Transferred (low confidence)    |
| AZOLI_0948 | Ancestral (low confidence)                   | AZOBR_40239 | Horizontally Transferred (high confidence)   |
| AZOLI_0950 | Ancestral (low confidence)                   | AZOBR_40240 | Horizontally Transferred (high confidence)   |
| AZOLI_0951 | Horizontally Transferred (high confidence)   | AZOBR_40241 | Ancestral (low confidence)                   |
| AZOLI_0952 | Horizontally Transferred (high confidence)   | AZOBR_40242 | Unassigned                                   |
| AZOLI_0953 | Ancestral (low confidence)                   | AZOBR_40243 | Ancestral (medium confidence)                |
| AZOLI_0954 | Unassigned                                   | AZOBR_40244 | Ancestral (low confidence)                   |
| AZOLI_0956 | Unassigned                                   | AZOBR_40245 | Horizontally Transferred (low confidence)    |
| AZOLI_0957 | Unassigned                                   | AZOBR_40246 | Ancestral (medium confidence)                |
| AZOLI_0958 | Horizontally Transferred (high confidence)   | AZOBR_40247 | Horizontally Transferred (high confidence)   |
| AZOLI_0959 | Ancestral (medium confidence)                | AZOBR_40248 | Ancestral (low confidence)                   |
| AZOLI_0960 | Ancestral (medium confidence)                | AZOBR_40249 | Unassigned                                   |
| AZOLI_0961 | Ancestral (low confidence)                   | AZOBR_40250 | Ancestral (medium confidence)                |
| AZOLI_0963 | Horizontally Transferred (high confidence)   | AZOBR_40251 | Ancestral (medium confidence)                |
| AZOLI_0964 | Ancestral (high confidence)                  | AZOBR_40252 | Ancestral (high confidence)                  |
| AZOLI_0965 | Horizontally Transferred (high confidence)   | AZOBR_40253 | Ancestral (high confidence)                  |
| AZOLI_0966 | Unassigned                                   | AZOBR_40254 | Ancestral (high confidence)                  |
| AZOLI_0967 | Horizontally Transferred (high confidence)   | AZOBR_40255 | Ancestral (medium confidence)                |
| AZOLI_0968 | Ancestral (medium confidence)                | AZOBR_40256 | Ancestral (high confidence)                  |
| AZOLI_0969 | Ancestral (medium confidence)                | AZOBR_40257 | Ancestral (medium confidence)                |
| AZOLI_0970 | Ancestral (high confidence)                  | AZOBR_40258 | Horizontally Transferred (high confidence)   |
| AZOLI_0971 | Unassigned                                   | AZOBR_40259 | Horizontally Transferred (high confidence)   |
| AZOLI_0972 | Ancestral (high confidence)                  | AZOBR_40260 | Horizontally Transferred (high confidence)   |
| AZOLI_0973 | Ancestral (low confidence)                   | AZOBR_40261 | Horizontally Transferred (medium confidence) |
| AZOLI_0974 | Ancestral (low confidence)                   | AZOBR_40262 | Ancestral (medium confidence)                |
| AZOLI_0975 | Ancestral (low confidence)                   | AZOBR_40263 | Unassigned                                   |
| AZOLI_0976 | Ancestral (medium confidence)                | AZOBR_40264 | Horizontally Transferred (high confidence)   |
| AZOLI_0977 | Ancestral (medium confidence)                | AZOBR_40265 | Unassigned                                   |
| AZOLI_0978 | Ancestral (high confidence)                  | AZOBR_40266 | Unassigned                                   |
| AZOLI_0979 | Horizontally Transferred (high confidence)   | AZOBR_40267 | Horizontally Transferred (high confidence)   |
| AZOLI_0980 | Ancestral (high confidence)                  | AZOBR_40268 | Ancestral (medium confidence)                |
| AZOLI_0981 | Horizontally Transferred (medium confidence) | AZOBR_40269 | Ancestral (medium confidence)                |
| AZOLI_0982 | Horizontally Transferred (low confidence)    | AZOBR_40270 | Ancestral (high confidence)                  |
| AZOLI_0983 | Ancestral (medium confidence)                | AZOBR_40271 | Ancestral (medium confidence)                |
| AZOLI_0984 | Ancestral (high confidence)                  | AZOBR_40272 | Ancestral (medium confidence)                |
| AZOLI_0985 | Unassigned                                   | AZOBR_40273 | Ancestral (high confidence)                  |
| AZOLI_0986 | Ancestral (medium confidence)                | AZOBR_40274 | Ancestral (high confidence)                  |
| AZOLI_0987 | Ancestral (low confidence)                   | AZOBR_40275 | Ancestral (medium confidence)                |



|            |                                              |             |                                              |
|------------|----------------------------------------------|-------------|----------------------------------------------|
| AZOLI_1071 | Ancestral (high confidence)                  | AZOBR_40351 | Unassigned                                   |
| AZOLI_1072 | Ancestral (medium confidence)                | AZOBR_40352 | Ancestral (medium confidence)                |
| AZOLI_1073 | Ancestral (medium confidence)                | AZOBR_40353 | Ancestral (high confidence)                  |
| AZOLI_1074 | Ancestral (high confidence)                  | AZOBR_40354 | Ancestral (low confidence)                   |
| AZOLI_1075 | Ancestral (high confidence)                  | AZOBR_40355 | Unassigned                                   |
| AZOLI_1076 | Ancestral (high confidence)                  | AZOBR_40356 | Ancestral (high confidence)                  |
| AZOLI_1077 | Ancestral (high confidence)                  | AZOBR_40357 | Ancestral (high confidence)                  |
| AZOLI_1078 | Ancestral (high confidence)                  | AZOBR_40358 | Horizontally Transferred (high confidence)   |
| AZOLI_1079 | Ancestral (high confidence)                  | AZOBR_40359 | Horizontally Transferred (high confidence)   |
| AZOLI_1080 | Ancestral (high confidence)                  | AZOBR_40360 | Horizontally Transferred (medium confidence) |
| AZOLI_1081 | Ancestral (high confidence)                  | AZOBR_40361 | Ancestral (high confidence)                  |
| AZOLI_1082 | Ancestral (high confidence)                  | AZOBR_40362 | Ancestral (high confidence)                  |
| AZOLI_1083 | Ancestral (high confidence)                  | AZOBR_40363 | Ancestral (high confidence)                  |
| AZOLI_1084 | Ancestral (medium confidence)                | AZOBR_40364 | Ancestral (high confidence)                  |
| AZOLI_1085 | Horizontally Transferred (high confidence)   | AZOBR_40365 | Unassigned                                   |
| AZOLI_1086 | Unassigned                                   | AZOBR_40366 | Unassigned                                   |
| AZOLI_1088 | Ancestral (medium confidence)                | AZOBR_40367 | Ancestral (high confidence)                  |
| AZOLI_1089 | Ancestral (high confidence)                  | AZOBR_40368 | Ancestral (medium confidence)                |
| AZOLI_1090 | Ancestral (high confidence)                  | AZOBR_40369 | Horizontally Transferred (high confidence)   |
| AZOLI_1091 | Ancestral (high confidence)                  | AZOBR_40370 | Ancestral (low confidence)                   |
| AZOLI_1092 | Ancestral (high confidence)                  | AZOBR_40371 | Ancestral (low confidence)                   |
| AZOLI_1093 | Ancestral (high confidence)                  | AZOBR_40372 | Horizontally Transferred (high confidence)   |
| AZOLI_1094 | Unassigned                                   | AZOBR_40373 | Horizontally Transferred (high confidence)   |
| AZOLI_1095 | Ancestral (medium confidence)                | AZOBR_40374 | Unassigned                                   |
| AZOLI_1096 | Ancestral (high confidence)                  | AZOBR_40375 | Ancestral (high confidence)                  |
| AZOLI_1097 | Ancestral (high confidence)                  | AZOBR_40376 | Ancestral (medium confidence)                |
| AZOLI_1098 | Horizontally Transferred (high confidence)   | AZOBR_40377 | Unassigned                                   |
| AZOLI_1099 | Ancestral (high confidence)                  | AZOBR_40378 | Ancestral (high confidence)                  |
| AZOLI_1100 | Ancestral (high confidence)                  | AZOBR_40379 | Ancestral (high confidence)                  |
| AZOLI_1101 | Ancestral (medium confidence)                | AZOBR_40380 | Horizontally Transferred (high confidence)   |
| AZOLI_1102 | Ancestral (high confidence)                  | AZOBR_40381 | Horizontally Transferred (high confidence)   |
| AZOLI_1103 | Ancestral (high confidence)                  | AZOBR_40382 | Horizontally Transferred (high confidence)   |
| AZOLI_1104 | Ancestral (medium confidence)                | AZOBR_40383 | Horizontally Transferred (high confidence)   |
| AZOLI_1105 | Horizontally Transferred (high confidence)   | AZOBR_40384 | Horizontally Transferred (high confidence)   |
| AZOLI_1106 | Horizontally Transferred (high confidence)   | AZOBR_40385 | Ancestral (high confidence)                  |
| AZOLI_1107 | Ancestral (low confidence)                   | AZOBR_40386 | Ancestral (high confidence)                  |
| AZOLI_1108 | Horizontally Transferred (high confidence)   | AZOBR_40387 | Ancestral (medium confidence)                |
| AZOLI_1109 | Horizontally Transferred (high confidence)   | AZOBR_40388 | Ancestral (high confidence)                  |
| AZOLI_1110 | Ancestral (high confidence)                  | AZOBR_40389 | Ancestral (medium confidence)                |
| AZOLI_1111 | Ancestral (medium confidence)                | AZOBR_40390 | Ancestral (high confidence)                  |
| AZOLI_1112 | Ancestral (high confidence)                  | AZOBR_40391 | Unassigned                                   |
| AZOLI_1113 | Unassigned                                   | AZOBR_40392 | Horizontally Transferred (high confidence)   |
| AZOLI_1115 | Ancestral (high confidence)                  | AZOBR_40393 | Ancestral (medium confidence)                |
| AZOLI_1116 | Ancestral (medium confidence)                | AZOBR_40394 | Ancestral (high confidence)                  |
| AZOLI_1117 | Unassigned                                   | AZOBR_40395 | Ancestral (high confidence)                  |
| AZOLI_1118 | Ancestral (low confidence)                   | AZOBR_40396 | Ancestral (medium confidence)                |
| AZOLI_1119 | Horizontally Transferred (high confidence)   | AZOBR_40397 | Ancestral (high confidence)                  |
| AZOLI_1120 | Ancestral (medium confidence)                | AZOBR_40398 | Horizontally Transferred (high confidence)   |
| AZOLI_1121 | Horizontally Transferred (high confidence)   | AZOBR_40399 | Unassigned                                   |
| AZOLI_1122 | Ancestral (medium confidence)                | AZOBR_40400 | Unassigned                                   |
| AZOLI_1123 | Ancestral (medium confidence)                | AZOBR_40401 | Ancestral (low confidence)                   |
| AZOLI_1124 | Ancestral (low confidence)                   | AZOBR_40402 | Unassigned                                   |
| AZOLI_1125 | Unassigned                                   | AZOBR_40403 | Unassigned                                   |
| AZOLI_1126 | Ancestral (high confidence)                  | AZOBR_40404 | Horizontally Transferred (high confidence)   |
| AZOLI_1127 | Ancestral (low confidence)                   | AZOBR_40405 | Ancestral (medium confidence)                |
| AZOLI_1128 | Ancestral (low confidence)                   | AZOBR_40406 | Ancestral (low confidence)                   |
| AZOLI_1129 | Ancestral (medium confidence)                | AZOBR_40407 | Ancestral (low confidence)                   |
| AZOLI_1130 | Horizontally Transferred (high confidence)   | AZOBR_40408 | Ancestral (high confidence)                  |
| AZOLI_1131 | Ancestral (medium confidence)                | AZOBR_40409 | Ancestral (high confidence)                  |
| AZOLI_1132 | Ancestral (low confidence)                   | AZOBR_40410 | Horizontally Transferred (high confidence)   |
| AZOLI_1134 | Ancestral (high confidence)                  | AZOBR_40411 | Ancestral (low confidence)                   |
| AZOLI_1135 | Horizontally Transferred (high confidence)   | AZOBR_40412 | Ancestral (low confidence)                   |
| AZOLI_1136 | Horizontally Transferred (high confidence)   | AZOBR_40413 | Horizontally Transferred (high confidence)   |
| AZOLI_1137 | Ancestral (high confidence)                  | AZOBR_40414 | Ancestral (high confidence)                  |
| AZOLI_1138 | Ancestral (medium confidence)                | AZOBR_40415 | Ancestral (medium confidence)                |
| AZOLI_1139 | Ancestral (medium confidence)                | AZOBR_40416 | Ancestral (low confidence)                   |
| AZOLI_1140 | Ancestral (high confidence)                  | AZOBR_40417 | Horizontally Transferred (high confidence)   |
| AZOLI_1141 | Ancestral (high confidence)                  | AZOBR_40418 | Unassigned                                   |
| AZOLI_1142 | Horizontally Transferred (high confidence)   | AZOBR_40419 | Ancestral (low confidence)                   |
| AZOLI_1143 | Ancestral (medium confidence)                | AZOBR_40420 | Horizontally Transferred (high confidence)   |
| AZOLI_1144 | Ancestral (medium confidence)                | AZOBR_40421 | Horizontally Transferred (high confidence)   |
| AZOLI_1145 | Horizontally Transferred (high confidence)   | AZOBR_40422 | Horizontally Transferred (high confidence)   |
| AZOLI_1146 | Ancestral (low confidence)                   | AZOBR_40423 | Unassigned                                   |
| AZOLI_1147 | Ancestral (low confidence)                   | AZOBR_40424 | Horizontally Transferred (high confidence)   |
| AZOLI_1148 | Horizontally Transferred (medium confidence) | AZOBR_40425 | Unassigned                                   |



|            |                                              |             |                                              |
|------------|----------------------------------------------|-------------|----------------------------------------------|
| AZOLI_1228 | Ancestral (low confidence)                   | AZOBR_50056 | Horizontally Transferred (high confidence)   |
| AZOLI_1229 | Ancestral (low confidence)                   | AZOBR_50057 | Horizontally Transferred (high confidence)   |
| AZOLI_1230 | Unassigned                                   | AZOBR_50058 | Horizontally Transferred (high confidence)   |
| AZOLI_1231 | Horizontally Transferred (high confidence)   | AZOBR_50059 | Ancestral (low confidence)                   |
| AZOLI_1232 | Ancestral (medium confidence)                | AZOBR_50060 | Horizontally Transferred (high confidence)   |
| AZOLI_1234 | Ancestral (high confidence)                  | AZOBR_50061 | Ancestral (low confidence)                   |
| AZOLI_1235 | Ancestral (high confidence)                  | AZOBR_50062 | Unassigned                                   |
| AZOLI_1236 | Ancestral (low confidence)                   | AZOBR_50063 | Horizontally Transferred (high confidence)   |
| AZOLI_1237 | Horizontally Transferred (high confidence)   | AZOBR_60001 | Ancestral (low confidence)                   |
| AZOLI_1238 | Horizontally Transferred (high confidence)   | AZOBR_60002 | Unassigned                                   |
| AZOLI_1239 | Ancestral (medium confidence)                | AZOBR_60003 | Horizontally Transferred (low confidence)    |
| AZOLI_1241 | Unassigned                                   | AZOBR_60004 | Horizontally Transferred (high confidence)   |
| AZOLI_1242 | Horizontally Transferred (medium confidence) | AZOBR_60005 | Ancestral (low confidence)                   |
| AZOLI_1243 | Horizontally Transferred (medium confidence) | AZOBR_60006 | Ancestral (medium confidence)                |
| AZOLI_1244 | Ancestral (medium confidence)                | AZOBR_60007 | Ancestral (medium confidence)                |
| AZOLI_1245 | Ancestral (medium confidence)                | AZOBR_60008 | Horizontally Transferred (medium confidence) |
| AZOLI_1246 | Ancestral (high confidence)                  | AZOBR_60009 | Ancestral (low confidence)                   |
| AZOLI_1248 | Unassigned                                   | AZOBR_60010 | Unassigned                                   |
| AZOLI_1251 | Unassigned                                   | AZOBR_60011 | Ancestral (low confidence)                   |
| AZOLI_1252 | Ancestral (high confidence)                  | AZOBR_60012 | Horizontally Transferred (high confidence)   |
| AZOLI_1253 | Ancestral (medium confidence)                | AZOBR_60013 | Horizontally Transferred (high confidence)   |
| AZOLI_1254 | Ancestral (low confidence)                   | AZOBR_60014 | Unassigned                                   |
| AZOLI_1255 | Ancestral (high confidence)                  | AZOBR_60015 | Horizontally Transferred (high confidence)   |
| AZOLI_1256 | Unassigned                                   | AZOBR_60016 | Horizontally Transferred (high confidence)   |
| AZOLI_1257 | Horizontally Transferred (high confidence)   | AZOBR_60017 | Unassigned                                   |
| AZOLI_1258 | Ancestral (low confidence)                   | AZOBR_60018 | Horizontally Transferred (medium confidence) |
| AZOLI_1259 | Ancestral (medium confidence)                | AZOBR_60019 | Ancestral (low confidence)                   |
| AZOLI_1260 | Unassigned                                   | AZOBR_60020 | Unassigned                                   |
| AZOLI_1261 | Ancestral (high confidence)                  | AZOBR_60021 | Horizontally Transferred (high confidence)   |
| AZOLI_1262 | Ancestral (low confidence)                   | AZOBR_60022 | Horizontally Transferred (medium confidence) |
| AZOLI_1263 | Ancestral (medium confidence)                | AZOBR_60023 | Horizontally Transferred (high confidence)   |
| AZOLI_1264 | Ancestral (medium confidence)                | AZOBR_60024 | Horizontally Transferred (medium confidence) |
| AZOLI_1265 | Horizontally Transferred (high confidence)   | AZOBR_60025 | Horizontally Transferred (high confidence)   |
| AZOLI_1266 | Ancestral (low confidence)                   | AZOBR_70001 | Horizontally Transferred (high confidence)   |
| AZOLI_1269 | Horizontally Transferred (high confidence)   | AZOBR_70002 | Ancestral (high confidence)                  |
| AZOLI_1270 | Ancestral (high confidence)                  | AZOBR_70003 | Horizontally Transferred (high confidence)   |
| AZOLI_1271 | Ancestral (medium confidence)                | AZOBR_70004 | Horizontally Transferred (high confidence)   |
| AZOLI_1274 | Ancestral (high confidence)                  | AZOBR_70005 | Unassigned                                   |
| AZOLI_1275 | Ancestral (high confidence)                  | AZOBR_70006 | Unassigned                                   |
| AZOLI_1276 | Ancestral (medium confidence)                | AZOBR_70007 | Unassigned                                   |
| AZOLI_1277 | Ancestral (low confidence)                   | AZOBR_70008 | Ancestral (low confidence)                   |
| AZOLI_1278 | Unassigned                                   | AZOBR_70009 | Horizontally Transferred (high confidence)   |
| AZOLI_1279 | Ancestral (high confidence)                  | AZOBR_70010 | Ancestral (high confidence)                  |
| AZOLI_1280 | Ancestral (high confidence)                  | AZOBR_70011 | Ancestral (high confidence)                  |
| AZOLI_1281 | Ancestral (high confidence)                  | AZOBR_70012 | Ancestral (high confidence)                  |
| AZOLI_1282 | Ancestral (low confidence)                   | AZOBR_70013 | Ancestral (high confidence)                  |
| AZOLI_1283 | Ancestral (medium confidence)                | AZOBR_70014 | Ancestral (high confidence)                  |
| AZOLI_1284 | Horizontally Transferred (high confidence)   | AZOBR_70015 | Unassigned                                   |
| AZOLI_1285 | Horizontally Transferred (high confidence)   | AZOBR_70016 | Horizontally Transferred (high confidence)   |
| AZOLI_1286 | Ancestral (low confidence)                   | AZOBR_70017 | Ancestral (high confidence)                  |
| AZOLI_1287 | Ancestral (low confidence)                   | AZOBR_70018 | Unassigned                                   |
| AZOLI_1288 | Horizontally Transferred (low confidence)    | AZOBR_70019 | Ancestral (medium confidence)                |
| AZOLI_1289 | Horizontally Transferred (high confidence)   | AZOBR_70020 | Horizontally Transferred (high confidence)   |
| AZOLI_1290 | Horizontally Transferred (high confidence)   | AZOBR_70021 | Ancestral (low confidence)                   |
| AZOLI_1291 | Horizontally Transferred (high confidence)   | AZOBR_70022 | Unassigned                                   |
| AZOLI_1292 | Horizontally Transferred (high confidence)   | AZOBR_70023 | Ancestral (medium confidence)                |
| AZOLI_1293 | Unassigned                                   | AZOBR_70024 | Unassigned                                   |
| AZOLI_1294 | Unassigned                                   | AZOBR_70025 | Unassigned                                   |
| AZOLI_1296 | Ancestral (low confidence)                   | AZOBR_70026 | Ancestral (medium confidence)                |
| AZOLI_1297 | Ancestral (high confidence)                  | AZOBR_70027 | Unassigned                                   |
| AZOLI_1298 | Ancestral (high confidence)                  | AZOBR_70028 | Ancestral (high confidence)                  |
| AZOLI_1299 | Ancestral (high confidence)                  | AZOBR_70029 | Ancestral (low confidence)                   |
| AZOLI_1300 | Ancestral (medium confidence)                | AZOBR_70030 | Unassigned                                   |
| AZOLI_1301 | Horizontally Transferred (medium confidence) | AZOBR_70031 | Horizontally Transferred (low confidence)    |
| AZOLI_1302 | Ancestral (medium confidence)                | AZOBR_70032 | Unassigned                                   |
| AZOLI_1303 | Ancestral (high confidence)                  | AZOBR_70033 | Ancestral (high confidence)                  |
| AZOLI_1304 | Ancestral (high confidence)                  | AZOBR_70034 | Ancestral (medium confidence)                |
| AZOLI_1305 | Ancestral (high confidence)                  | AZOBR_70035 | Ancestral (low confidence)                   |
| AZOLI_1306 | Ancestral (high confidence)                  | AZOBR_70036 | Ancestral (medium confidence)                |
| AZOLI_1307 | Ancestral (high confidence)                  | AZOBR_70037 | Ancestral (high confidence)                  |
| AZOLI_1308 | Ancestral (medium confidence)                | AZOBR_70038 | Ancestral (low confidence)                   |
| AZOLI_1309 | Unassigned                                   | AZOBR_70039 | Ancestral (high confidence)                  |
| AZOLI_1310 | Ancestral (low confidence)                   | AZOBR_70040 | Ancestral (medium confidence)                |
| AZOLI_1311 | Ancestral (high confidence)                  | AZOBR_70041 | Ancestral (high confidence)                  |
| AZOLI_1312 | Ancestral (high confidence)                  | AZOBR_70042 | Ancestral (high confidence)                  |



|            |                                              |             |                                              |
|------------|----------------------------------------------|-------------|----------------------------------------------|
| AZOLI_1313 | Ancestral (high confidence)                  | AZOBR_70043 | Ancestral (low confidence)                   |
| AZOLI_1314 | Ancestral (low confidence)                   | AZOBR_70044 | Ancestral (medium confidence)                |
| AZOLI_1315 | Horizontally Transferred (high confidence)   | AZOBR_70045 | Ancestral (high confidence)                  |
| AZOLI_1316 | Ancestral (medium confidence)                | AZOBR_70046 | Ancestral (low confidence)                   |
| AZOLI_1317 | Ancestral (medium confidence)                | AZOBR_70047 | Ancestral (low confidence)                   |
| AZOLI_1318 | Ancestral (medium confidence)                | AZOBR_70048 | Ancestral (medium confidence)                |
| AZOLI_1319 | Unassigned                                   | AZOBR_70049 | Ancestral (medium confidence)                |
| AZOLI_1320 | Ancestral (low confidence)                   | AZOBR_70050 | Unassigned                                   |
| AZOLI_1321 | Ancestral (low confidence)                   | AZOBR_70051 | Ancestral (low confidence)                   |
| AZOLI_1322 | Unassigned                                   | AZOBR_70052 | Ancestral (medium confidence)                |
| AZOLI_1323 | Horizontally Transferred (high confidence)   | AZOBR_70053 | Horizontally Transferred (high confidence)   |
| AZOLI_1324 | Ancestral (low confidence)                   | AZOBR_70054 | Ancestral (medium confidence)                |
| AZOLI_1325 | Ancestral (medium confidence)                | AZOBR_70055 | Ancestral (medium confidence)                |
| AZOLI_1326 | Unassigned                                   | AZOBR_70056 | Ancestral (medium confidence)                |
| AZOLI_1328 | Ancestral (high confidence)                  | AZOBR_70057 | Ancestral (medium confidence)                |
| AZOLI_1329 | Ancestral (high confidence)                  | AZOBR_70058 | Unassigned                                   |
| AZOLI_1330 | Ancestral (high confidence)                  | AZOBR_70059 | Unassigned                                   |
| AZOLI_1331 | Ancestral (high confidence)                  | AZOBR_70060 | Horizontally Transferred (high confidence)   |
| AZOLI_1332 | Horizontally Transferred (high confidence)   | AZOBR_70061 | Unassigned                                   |
| AZOLI_1333 | Ancestral (high confidence)                  | AZOBR_70062 | Ancestral (low confidence)                   |
| AZOLI_1334 | Horizontally Transferred (medium confidence) | AZOBR_70063 | Ancestral (low confidence)                   |
| AZOLI_1335 | Ancestral (medium confidence)                | AZOBR_70064 | Unassigned                                   |
| AZOLI_1336 | Ancestral (high confidence)                  | AZOBR_70065 | Ancestral (high confidence)                  |
| AZOLI_1337 | Horizontally Transferred (high confidence)   | AZOBR_70066 | Ancestral (high confidence)                  |
| AZOLI_1338 | Ancestral (high confidence)                  | AZOBR_70067 | Ancestral (medium confidence)                |
| AZOLI_1339 | Ancestral (high confidence)                  | AZOBR_70068 | Ancestral (high confidence)                  |
| AZOLI_1340 | Ancestral (high confidence)                  | AZOBR_70069 | Ancestral (high confidence)                  |
| AZOLI_1341 | Ancestral (high confidence)                  | AZOBR_70070 | Unassigned                                   |
| AZOLI_1342 | Ancestral (high confidence)                  | AZOBR_70071 | Ancestral (high confidence)                  |
| AZOLI_1343 | Ancestral (high confidence)                  | AZOBR_70072 | Unassigned                                   |
| AZOLI_1344 | Ancestral (high confidence)                  | AZOBR_70073 | Ancestral (high confidence)                  |
| AZOLI_1345 | Ancestral (high confidence)                  | AZOBR_70074 | Ancestral (high confidence)                  |
| AZOLI_1346 | Horizontally Transferred (high confidence)   | AZOBR_70075 | Unassigned                                   |
| AZOLI_1347 | Horizontally Transferred (high confidence)   | AZOBR_70076 | Unassigned                                   |
| AZOLI_1348 | Ancestral (high confidence)                  | AZOBR_70077 | Ancestral (low confidence)                   |
| AZOLI_1349 | Ancestral (high confidence)                  | AZOBR_70078 | Ancestral (low confidence)                   |
| AZOLI_1350 | Ancestral (high confidence)                  | AZOBR_70079 | Ancestral (low confidence)                   |
| AZOLI_1351 | Horizontally Transferred (high confidence)   | AZOBR_70080 | Unassigned                                   |
| AZOLI_1352 | Horizontally Transferred (high confidence)   | AZOBR_70081 | Unassigned                                   |
| AZOLI_1353 | Ancestral (medium confidence)                | AZOBR_70082 | Ancestral (high confidence)                  |
| AZOLI_1355 | Ancestral (medium confidence)                | AZOBR_70083 | Ancestral (medium confidence)                |
| AZOLI_1356 | Ancestral (low confidence)                   | AZOBR_70084 | Unassigned                                   |
| AZOLI_1357 | Ancestral (low confidence)                   | AZOBR_70085 | Ancestral (high confidence)                  |
| AZOLI_1358 | Ancestral (low confidence)                   | AZOBR_70086 | Ancestral (low confidence)                   |
| AZOLI_1359 | Ancestral (low confidence)                   | AZOBR_70087 | Unassigned                                   |
| AZOLI_1360 | Horizontally Transferred (high confidence)   | AZOBR_70088 | Ancestral (low confidence)                   |
| AZOLI_1361 | Ancestral (medium confidence)                | AZOBR_70089 | Ancestral (low confidence)                   |
| AZOLI_1362 | Horizontally Transferred (high confidence)   | AZOBR_70090 | Horizontally Transferred (high confidence)   |
| AZOLI_1363 | Horizontally Transferred (high confidence)   | AZOBR_70091 | Unassigned                                   |
| AZOLI_1364 | Ancestral (low confidence)                   | AZOBR_70092 | Ancestral (high confidence)                  |
| AZOLI_1365 | Horizontally Transferred (high confidence)   | AZOBR_70093 | Ancestral (medium confidence)                |
| AZOLI_1366 | Horizontally Transferred (low confidence)    | AZOBR_70094 | Ancestral (medium confidence)                |
| AZOLI_1367 | Unassigned                                   | AZOBR_70095 | Ancestral (high confidence)                  |
| AZOLI_1368 | Horizontally Transferred (high confidence)   | AZOBR_70096 | Ancestral (low confidence)                   |
| AZOLI_1370 | Ancestral (medium confidence)                | AZOBR_70097 | Ancestral (low confidence)                   |
| AZOLI_1371 | Ancestral (low confidence)                   | AZOBR_70098 | Ancestral (high confidence)                  |
| AZOLI_1372 | Ancestral (high confidence)                  | AZOBR_70099 | Unassigned                                   |
| AZOLI_1373 | Ancestral (high confidence)                  | AZOBR_70100 | Unassigned                                   |
| AZOLI_1375 | Ancestral (medium confidence)                | AZOBR_70101 | Horizontally Transferred (high confidence)   |
| AZOLI_1376 | Ancestral (high confidence)                  | AZOBR_70102 | Ancestral (high confidence)                  |
| AZOLI_1377 | Ancestral (high confidence)                  | AZOBR_70103 | Unassigned                                   |
| AZOLI_1378 | Horizontally Transferred (medium confidence) | AZOBR_70104 | Horizontally Transferred (high confidence)   |
| AZOLI_1379 | Ancestral (high confidence)                  | AZOBR_70105 | Unassigned                                   |
| AZOLI_1380 | Ancestral (high confidence)                  | AZOBR_70106 | Ancestral (medium confidence)                |
| AZOLI_1381 | Ancestral (high confidence)                  | AZOBR_70107 | Ancestral (medium confidence)                |
| AZOLI_1382 | Ancestral (high confidence)                  | AZOBR_70108 | Ancestral (medium confidence)                |
| AZOLI_1383 | Ancestral (high confidence)                  | AZOBR_70109 | Horizontally Transferred (medium confidence) |
| AZOLI_1384 | Unassigned                                   | AZOBR_70110 | Horizontally Transferred (high confidence)   |
| AZOLI_1385 | Ancestral (medium confidence)                | AZOBR_70111 | Ancestral (high confidence)                  |
| AZOLI_1386 | Ancestral (medium confidence)                | AZOBR_70112 | Horizontally Transferred (low confidence)    |
| AZOLI_1387 | Ancestral (medium confidence)                | AZOBR_70113 | Horizontally Transferred (medium confidence) |
| AZOLI_1388 | Ancestral (medium confidence)                | AZOBR_70114 | Ancestral (low confidence)                   |
| AZOLI_1389 | Ancestral (low confidence)                   | AZOBR_70115 | Horizontally Transferred (high confidence)   |
| AZOLI_1390 | Ancestral (medium confidence)                | AZOBR_70116 | Ancestral (low confidence)                   |
| AZOLI_1391 | Unassigned                                   | AZOBR_70117 | Ancestral (low confidence)                   |

|            |                                              |             |                                              |
|------------|----------------------------------------------|-------------|----------------------------------------------|
| AZOLI_1392 | Ancestral (low confidence)                   | AZOBR_70118 | Unassigned                                   |
| AZOLI_1393 | Ancestral (high confidence)                  | AZOBR_70119 | Ancestral (low confidence)                   |
| AZOLI_1394 | Ancestral (medium confidence)                | AZOBR_70120 | Horizontally Transferred (high confidence)   |
| AZOLI_1395 | Ancestral (medium confidence)                | AZOBR_70121 | Horizontally Transferred (high confidence)   |
| AZOLI_1396 | Ancestral (high confidence)                  | AZOBR_70122 | Horizontally Transferred (high confidence)   |
| AZOLI_1397 | Ancestral (high confidence)                  | AZOBR_70123 | Ancestral (low confidence)                   |
| AZOLI_1398 | Ancestral (high confidence)                  | AZOBR_70124 | Horizontally Transferred (high confidence)   |
| AZOLI_1399 | Ancestral (high confidence)                  | AZOBR_70125 | Horizontally Transferred (low confidence)    |
| AZOLI_1400 | Ancestral (high confidence)                  | AZOBR_70126 | Unassigned                                   |
| AZOLI_1401 | Ancestral (high confidence)                  | AZOBR_70127 | Horizontally Transferred (medium confidence) |
| AZOLI_1402 | Ancestral (low confidence)                   | AZOBR_70128 | Unassigned                                   |
| AZOLI_1403 | Ancestral (high confidence)                  | AZOBR_70129 | Unassigned                                   |
| AZOLI_1404 | Unassigned                                   | AZOBR_70130 | Horizontally Transferred (high confidence)   |
| AZOLI_1406 | Ancestral (low confidence)                   | AZOBR_70131 | Unassigned                                   |
| AZOLI_1407 | Ancestral (high confidence)                  | AZOBR_70132 | Ancestral (high confidence)                  |
| AZOLI_1408 | Horizontally Transferred (low confidence)    | AZOBR_70133 | Ancestral (high confidence)                  |
| AZOLI_1409 | Ancestral (high confidence)                  | AZOBR_70134 | Ancestral (low confidence)                   |
| AZOLI_1411 | Ancestral (medium confidence)                | AZOBR_70135 | Horizontally Transferred (high confidence)   |
| AZOLI_1412 | Ancestral (low confidence)                   | AZOBR_70136 | Ancestral (low confidence)                   |
| AZOLI_1413 | Ancestral (high confidence)                  | AZOBR_70137 | Horizontally Transferred (medium confidence) |
| AZOLI_1414 | Ancestral (high confidence)                  | AZOBR_70138 | Horizontally Transferred (high confidence)   |
| AZOLI_1415 | Ancestral (high confidence)                  | AZOBR_70139 | Horizontally Transferred (high confidence)   |
| AZOLI_1416 | Ancestral (medium confidence)                | AZOBR_70140 | Horizontally Transferred (high confidence)   |
| AZOLI_1417 | Ancestral (medium confidence)                | AZOBR_70141 | Horizontally Transferred (high confidence)   |
| AZOLI_1418 | Ancestral (high confidence)                  | AZOBR_70142 | Horizontally Transferred (high confidence)   |
| AZOLI_1419 | Ancestral (high confidence)                  | AZOBR_70143 | Ancestral (high confidence)                  |
| AZOLI_1420 | Ancestral (medium confidence)                | AZOBR_70144 | Unassigned                                   |
| AZOLI_1421 | Ancestral (high confidence)                  | AZOBR_70145 | Unassigned                                   |
| AZOLI_1422 | Ancestral (medium confidence)                | AZOBR_70146 | Ancestral (low confidence)                   |
| AZOLI_1423 | Ancestral (low confidence)                   | AZOBR_70147 | Horizontally Transferred (high confidence)   |
| AZOLI_1424 | Ancestral (medium confidence)                | AZOBR_70148 | Horizontally Transferred (high confidence)   |
| AZOLI_1425 | Unassigned                                   | AZOBR_70149 | Unassigned                                   |
| AZOLI_1426 | Horizontally Transferred (high confidence)   | AZOBR_70150 | Ancestral (medium confidence)                |
| AZOLI_1427 | Ancestral (low confidence)                   | AZOBR_70151 | Ancestral (low confidence)                   |
| AZOLI_1428 | Ancestral (medium confidence)                | AZOBR_70152 | Unassigned                                   |
| AZOLI_1430 | Ancestral (medium confidence)                | AZOBR_70153 | Unassigned                                   |
| AZOLI_1431 | Horizontally Transferred (high confidence)   | AZOBR_70154 | Ancestral (low confidence)                   |
| AZOLI_1432 | Ancestral (high confidence)                  | AZOBR_70155 | Ancestral (high confidence)                  |
| AZOLI_1433 | Ancestral (high confidence)                  | AZOBR_70156 | Ancestral (medium confidence)                |
| AZOLI_1434 | Ancestral (high confidence)                  | AZOBR_70157 | Ancestral (medium confidence)                |
| AZOLI_1435 | Ancestral (low confidence)                   | AZOBR_70158 | Unassigned                                   |
| AZOLI_1437 | Ancestral (low confidence)                   | AZOBR_70159 | Ancestral (medium confidence)                |
| AZOLI_1438 | Ancestral (high confidence)                  | AZOBR_70160 | Unassigned                                   |
| AZOLI_1439 | Ancestral (low confidence)                   | AZOBR_70161 | Ancestral (medium confidence)                |
| AZOLI_1440 | Horizontally Transferred (high confidence)   | AZOBR_70162 | Ancestral (low confidence)                   |
| AZOLI_1441 | Horizontally Transferred (high confidence)   | AZOBR_70163 | Ancestral (low confidence)                   |
| AZOLI_1442 | Horizontally Transferred (high confidence)   | AZOBR_70164 | Ancestral (medium confidence)                |
| AZOLI_1443 | Unassigned                                   | AZOBR_70165 | Ancestral (medium confidence)                |
| AZOLI_1444 | Horizontally Transferred (high confidence)   | AZOBR_70166 | Unassigned                                   |
| AZOLI_1445 | Ancestral (low confidence)                   | AZOBR_70167 | Unassigned                                   |
| AZOLI_1446 | Ancestral (medium confidence)                | AZOBR_70168 | Horizontally Transferred (high confidence)   |
| AZOLI_1447 | Ancestral (medium confidence)                | AZOBR_70169 | Ancestral (medium confidence)                |
| AZOLI_1448 | Horizontally Transferred (high confidence)   | AZOBR_70170 | Ancestral (high confidence)                  |
| AZOLI_1449 | Unassigned                                   | AZOBR_70171 | Unassigned                                   |
| AZOLI_1450 | Horizontally Transferred (high confidence)   | AZOBR_70172 | Ancestral (high confidence)                  |
| AZOLI_1451 | Unassigned                                   | AZOBR_70173 | Ancestral (high confidence)                  |
| AZOLI_1452 | Ancestral (medium confidence)                | AZOBR_70174 | Ancestral (high confidence)                  |
| AZOLI_1453 | Ancestral (medium confidence)                | AZOBR_70175 | Ancestral (low confidence)                   |
| AZOLI_1454 | Ancestral (low confidence)                   | AZOBR_70176 | Ancestral (high confidence)                  |
| AZOLI_1455 | Ancestral (medium confidence)                | AZOBR_70177 | Ancestral (high confidence)                  |
| AZOLI_1456 | Horizontally Transferred (high confidence)   | AZOBR_70178 | Ancestral (high confidence)                  |
| AZOLI_1457 | Ancestral (medium confidence)                | AZOBR_70179 | Ancestral (high confidence)                  |
| AZOLI_1458 | Ancestral (high confidence)                  | AZOBR_70180 | Horizontally Transferred (high confidence)   |
| AZOLI_1459 | Ancestral (high confidence)                  | AZOBR_70181 | Ancestral (high confidence)                  |
| AZOLI_1460 | Ancestral (medium confidence)                | AZOBR_70182 | Ancestral (high confidence)                  |
| AZOLI_1461 | Ancestral (high confidence)                  | AZOBR_70183 | Ancestral (high confidence)                  |
| AZOLI_1462 | Horizontally Transferred (high confidence)   | AZOBR_70184 | Ancestral (high confidence)                  |
| AZOLI_1463 | Horizontally Transferred (high confidence)   | AZOBR_70185 | Ancestral (high confidence)                  |
| AZOLI_1464 | Ancestral (high confidence)                  | AZOBR_70186 | Ancestral (high confidence)                  |
| AZOLI_1465 | Horizontally Transferred (medium confidence) | AZOBR_70187 | Ancestral (high confidence)                  |
| AZOLI_1466 | Horizontally Transferred (medium confidence) | AZOBR_70188 | Ancestral (medium confidence)                |
| AZOLI_1467 | Ancestral (high confidence)                  | AZOBR_70189 | Ancestral (medium confidence)                |
| AZOLI_1468 | Horizontally Transferred (high confidence)   | AZOBR_70190 | Ancestral (low confidence)                   |
| AZOLI_1470 | Unassigned                                   | AZOBR_70191 | Unassigned                                   |
| AZOLI_1471 | Horizontally Transferred (high confidence)   | AZOBR_70192 | Ancestral (low confidence)                   |

|            |                                              |              |                                              |
|------------|----------------------------------------------|--------------|----------------------------------------------|
| AZOLI_1472 | Horizontally Transferred (high confidence)   | AZOBR_70193  | Horizontally Transferred (low confidence)    |
| AZOLI_1473 | Horizontally Transferred (high confidence)   | AZOBR_70194  | Unassigned                                   |
| AZOLI_1474 | Ancestral (medium confidence)                | AZOBR_70195  | Ancestral (low confidence)                   |
| AZOLI_1475 | Ancestral (medium confidence)                | AZOBR_70196  | Horizontally Transferred (high confidence)   |
| AZOLI_1476 | Horizontally Transferred (high confidence)   | AZOBR_70197  | Horizontally Transferred (high confidence)   |
| AZOLI_1477 | Horizontally Transferred (high confidence)   | AZOBR_70198  | Ancestral (low confidence)                   |
| AZOLI_1478 | Ancestral (high confidence)                  | AZOBR_70199  | Horizontally Transferred (high confidence)   |
| AZOLI_1479 | Ancestral (high confidence)                  | AZOBR_70200  | Unassigned                                   |
| AZOLI_1480 | Ancestral (medium confidence)                | AZOBR_70201  | Horizontally Transferred (high confidence)   |
| AZOLI_1481 | Ancestral (high confidence)                  | AZOBR_70202  | Horizontally Transferred (high confidence)   |
| AZOLI_1482 | Ancestral (high confidence)                  | AZOBR_70203  | Unassigned                                   |
| AZOLI_1483 | Ancestral (high confidence)                  | AZOBR_70204  | Horizontally Transferred (low confidence)    |
| AZOLI_1484 | Ancestral (high confidence)                  | AZOBR_70205  | Unassigned                                   |
| AZOLI_1485 | Ancestral (high confidence)                  | AZOBR_70206  | Unassigned                                   |
| AZOLI_1486 | Ancestral (high confidence)                  | AZOBR_70207  | Horizontally Transferred (high confidence)   |
| AZOLI_1487 | Unassigned                                   | AZOBR_70208  | Horizontally Transferred (high confidence)   |
| AZOLI_1488 | Ancestral (high confidence)                  | AZOBR_70209  | Ancestral (low confidence)                   |
| AZOLI_1489 | Ancestral (medium confidence)                | AZOBR_70210  | Horizontally Transferred (high confidence)   |
| AZOLI_1490 | Ancestral (medium confidence)                | AZOBR_70211  | Unassigned                                   |
| AZOLI_1491 | Horizontally Transferred (high confidence)   | AZOBR_70212  | Unassigned                                   |
| AZOLI_1492 | Ancestral (high confidence)                  | AZOBR_70213  | Unassigned                                   |
| AZOLI_1493 | Ancestral (medium confidence)                | AZOBR_70214  | Horizontally Transferred (medium confidence) |
| AZOLI_1494 | Ancestral (medium confidence)                | AZOBR_80001  | Ancestral (low confidence)                   |
| AZOLI_1495 | Ancestral (high confidence)                  | AZOBR_80002  | Unassigned                                   |
| AZOLI_1496 | Horizontally Transferred (high confidence)   | AZOBR_80003  | Unassigned                                   |
| AZOLI_1497 | Ancestral (low confidence)                   | AZOBR_80004  | Ancestral (low confidence)                   |
| AZOLI_1498 | Ancestral (medium confidence)                | AZOBR_80005  | Ancestral (medium confidence)                |
| AZOLI_1499 | Ancestral (high confidence)                  | AZOBR_80006  | Horizontally Transferred (medium confidence) |
| AZOLI_1501 | Ancestral (medium confidence)                | AZOBR_80007  | Unassigned                                   |
| AZOLI_1502 | Horizontally Transferred (high confidence)   | AZOBR_80008  | Unassigned                                   |
| AZOLI_1503 | Ancestral (high confidence)                  | AZOBR_80009  | Unassigned                                   |
| AZOLI_1504 | Ancestral (high confidence)                  | AZOBR_80010  | Horizontally Transferred (high confidence)   |
| AZOLI_1505 | Ancestral (medium confidence)                | AZOBR_80011  | Horizontally Transferred (high confidence)   |
| AZOLI_1506 | Horizontally Transferred (high confidence)   | AZOBR_80012  | Horizontally Transferred (high confidence)   |
| AZOLI_1507 | Ancestral (high confidence)                  | AZOBR_80013  | Horizontally Transferred (high confidence)   |
| AZOLI_1508 | Ancestral (high confidence)                  | AZOBR_80014  | Ancestral (low confidence)                   |
| AZOLI_1509 | Ancestral (medium confidence)                | AZOBR_80015  | Horizontally Transferred (high confidence)   |
| AZOLI_1510 | Ancestral (high confidence)                  | AZOBR_90001  | Horizontally Transferred (high confidence)   |
| AZOLI_1511 | Ancestral (high confidence)                  | AZOBR_90002  | Unassigned                                   |
| AZOLI_1512 | Ancestral (high confidence)                  | AZOBR_90003  | Ancestral (low confidence)                   |
| AZOLI_1513 | Ancestral (high confidence)                  | AZOBR_90004  | Unassigned                                   |
| AZOLI_1515 | Ancestral (low confidence)                   | AZOBR_90005  | Unassigned                                   |
| AZOLI_1516 | Ancestral (medium confidence)                | AZOBR_90006  | Ancestral (high confidence)                  |
| AZOLI_1517 | Horizontally Transferred (high confidence)   | AZOBR_90007  | Horizontally Transferred (high confidence)   |
| AZOLI_1518 | Horizontally Transferred (high confidence)   | AZOBR_90008  | Ancestral (high confidence)                  |
| AZOLI_1519 | Unassigned                                   | AZOBR_90009  | Ancestral (low confidence)                   |
| AZOLI_1520 | Horizontally Transferred (low confidence)    | AZOBR_90010  | Horizontally Transferred (low confidence)    |
| AZOLI_1521 | Horizontally Transferred (high confidence)   | AZOBR_90011  | Horizontally Transferred (high confidence)   |
| AZOLI_1522 | Horizontally Transferred (high confidence)   | AZOBR_90012  | Horizontally Transferred (high confidence)   |
| AZOLI_1523 | Horizontally Transferred (high confidence)   | AZOBR_90013  | Unassigned                                   |
| AZOLI_1524 | Horizontally Transferred (high confidence)   | AZOBR_90014  | Unassigned                                   |
| AZOLI_1525 | Ancestral (medium confidence)                | AZOBR_90015  | Unassigned                                   |
| AZOLI_1526 | Horizontally Transferred (high confidence)   | AZOBR_90016  | Horizontally Transferred (medium confidence) |
| AZOLI_1527 | Ancestral (high confidence)                  | AZOBR_90017  | Ancestral (low confidence)                   |
| AZOLI_1528 | Horizontally Transferred (low confidence)    | AZOBR_90018  | Horizontally Transferred (medium confidence) |
| AZOLI_1529 | Unassigned                                   | AZOBR_90019  | Unassigned                                   |
| AZOLI_1530 | Horizontally Transferred (low confidence)    | AZOBR_90020  | Ancestral (low confidence)                   |
| AZOLI_1531 | Ancestral (low confidence)                   | AZOBR_90021  | Unassigned                                   |
| AZOLI_1532 | Horizontally Transferred (high confidence)   | AZOBR_100001 | Ancestral (low confidence)                   |
| AZOLI_1533 | Ancestral (low confidence)                   | AZOBR_100002 | Ancestral (low confidence)                   |
| AZOLI_1534 | Ancestral (low confidence)                   | AZOBR_100003 | Unassigned                                   |
| AZOLI_1535 | Unassigned                                   | AZOBR_100004 | Ancestral (low confidence)                   |
| AZOLI_1536 | Unassigned                                   | AZOBR_100005 | Horizontally Transferred (high confidence)   |
| AZOLI_1537 | Horizontally Transferred (medium confidence) | AZOBR_100006 | Horizontally Transferred (high confidence)   |
| AZOLI_1538 | Ancestral (high confidence)                  | AZOBR_100007 | Horizontally Transferred (high confidence)   |
| AZOLI_1539 | Ancestral (medium confidence)                | AZOBR_100008 | Horizontally Transferred (high confidence)   |
| AZOLI_1540 | Ancestral (medium confidence)                | AZOBR_100009 | Ancestral (low confidence)                   |
| AZOLI_1541 | Ancestral (medium confidence)                | AZOBR_100010 | Ancestral (high confidence)                  |
| AZOLI_1543 | Unassigned                                   | AZOBR_100011 | Ancestral (medium confidence)                |
| AZOLI_1545 | Ancestral (medium confidence)                | AZOBR_100012 | Unassigned                                   |
| AZOLI_1546 | Ancestral (medium confidence)                | AZOBR_100013 | Ancestral (high confidence)                  |
| AZOLI_1547 | Ancestral (high confidence)                  | AZOBR_100014 | Ancestral (high confidence)                  |
| AZOLI_1548 | Ancestral (high confidence)                  | AZOBR_100015 | Ancestral (high confidence)                  |
| AZOLI_1549 | Horizontally Transferred (high confidence)   | AZOBR_100016 | Ancestral (medium confidence)                |
| AZOLI_1550 | Unassigned                                   | AZOBR_100017 | Ancestral (medium confidence)                |

|            |                                              |              |                                              |
|------------|----------------------------------------------|--------------|----------------------------------------------|
| AZOLI_1551 | Ancestral (medium confidence)                | AZOBR_100018 | Ancestral (low confidence)                   |
| AZOLI_1552 | Ancestral (medium confidence)                | AZOBR_100019 | Ancestral (low confidence)                   |
| AZOLI_1553 | Ancestral (high confidence)                  | AZOBR_100020 | Horizontally Transferred (high confidence)   |
| AZOLI_1554 | Ancestral (high confidence)                  | AZOBR_100021 | Unassigned                                   |
| AZOLI_1555 | Horizontally Transferred (high confidence)   | AZOBR_100022 | Ancestral (low confidence)                   |
| AZOLI_1556 | Ancestral (low confidence)                   | AZOBR_100023 | Ancestral (low confidence)                   |
| AZOLI_1557 | Ancestral (medium confidence)                | AZOBR_100024 | Ancestral (medium confidence)                |
| AZOLI_1558 | Ancestral (high confidence)                  | AZOBR_100025 | Ancestral (high confidence)                  |
| AZOLI_1559 | Ancestral (high confidence)                  | AZOBR_100026 | Unassigned                                   |
| AZOLI_1560 | Ancestral (medium confidence)                | AZOBR_100027 | Ancestral (high confidence)                  |
| AZOLI_1561 | Ancestral (high confidence)                  | AZOBR_100028 | Ancestral (high confidence)                  |
| AZOLI_1562 | Ancestral (low confidence)                   | AZOBR_100029 | Ancestral (high confidence)                  |
| AZOLI_1563 | Ancestral (high confidence)                  | AZOBR_100030 | Ancestral (medium confidence)                |
| AZOLI_1564 | Unassigned                                   | AZOBR_100031 | Ancestral (high confidence)                  |
| AZOLI_1567 | Horizontally Transferred (high confidence)   | AZOBR_100032 | Ancestral (high confidence)                  |
| AZOLI_1568 | Ancestral (medium confidence)                | AZOBR_100033 | Ancestral (high confidence)                  |
| AZOLI_1569 | Ancestral (medium confidence)                | AZOBR_100034 | Unassigned                                   |
| AZOLI_1570 | Ancestral (low confidence)                   | AZOBR_100035 | Ancestral (high confidence)                  |
| AZOLI_1571 | Ancestral (high confidence)                  | AZOBR_100036 | Ancestral (high confidence)                  |
| AZOLI_1572 | Ancestral (medium confidence)                | AZOBR_100037 | Ancestral (medium confidence)                |
| AZOLI_1573 | Ancestral (medium confidence)                | AZOBR_100038 | Ancestral (low confidence)                   |
| AZOLI_1574 | Ancestral (high confidence)                  | AZOBR_100039 | Ancestral (medium confidence)                |
| AZOLI_1575 | Unassigned                                   | AZOBR_100040 | Horizontally Transferred (high confidence)   |
| AZOLI_1576 | Ancestral (medium confidence)                | AZOBR_100041 | Ancestral (medium confidence)                |
| AZOLI_1577 | Ancestral (high confidence)                  | AZOBR_100042 | Ancestral (high confidence)                  |
| AZOLI_1578 | Unassigned                                   | AZOBR_100043 | Ancestral (high confidence)                  |
| AZOLI_1579 | Unassigned                                   | AZOBR_100044 | Ancestral (medium confidence)                |
| AZOLI_1580 | Horizontally Transferred (high confidence)   | AZOBR_100045 | Ancestral (medium confidence)                |
| AZOLI_1581 | Unassigned                                   | AZOBR_100046 | Horizontally Transferred (medium confidence) |
| AZOLI_1582 | Unassigned                                   | AZOBR_100047 | Horizontally Transferred (low confidence)    |
| AZOLI_1583 | Unassigned                                   | AZOBR_100048 | Ancestral (high confidence)                  |
| AZOLI_1584 | Ancestral (high confidence)                  | AZOBR_100049 | Ancestral (high confidence)                  |
| AZOLI_1585 | Ancestral (high confidence)                  | AZOBR_100050 | Ancestral (medium confidence)                |
| AZOLI_1586 | Unassigned                                   | AZOBR_100051 | Ancestral (medium confidence)                |
| AZOLI_1588 | Unassigned                                   | AZOBR_100052 | Horizontally Transferred (high confidence)   |
| AZOLI_1589 | Ancestral (low confidence)                   | AZOBR_100053 | Horizontally Transferred (high confidence)   |
| AZOLI_1590 | Horizontally Transferred (high confidence)   | AZOBR_100054 | Unassigned                                   |
| AZOLI_1591 | Ancestral (medium confidence)                | AZOBR_100055 | Ancestral (high confidence)                  |
| AZOLI_1592 | Ancestral (medium confidence)                | AZOBR_100056 | Horizontally Transferred (high confidence)   |
| AZOLI_1593 | Ancestral (high confidence)                  | AZOBR_100057 | Horizontally Transferred (high confidence)   |
| AZOLI_1595 | Ancestral (high confidence)                  | AZOBR_100058 | Horizontally Transferred (high confidence)   |
| AZOLI_1596 | Ancestral (medium confidence)                | AZOBR_100059 | Ancestral (high confidence)                  |
| AZOLI_1597 | Ancestral (high confidence)                  | AZOBR_100060 | Unassigned                                   |
| AZOLI_1598 | Ancestral (medium confidence)                | AZOBR_100061 | Horizontally Transferred (high confidence)   |
| AZOLI_1599 | Horizontally Transferred (high confidence)   | AZOBR_100062 | Horizontally Transferred (high confidence)   |
| AZOLI_1600 | Ancestral (medium confidence)                | AZOBR_100063 | Unassigned                                   |
| AZOLI_1601 | Ancestral (medium confidence)                | AZOBR_100064 | Ancestral (low confidence)                   |
| AZOLI_1602 | Ancestral (medium confidence)                | AZOBR_100065 | Unassigned                                   |
| AZOLI_1603 | Ancestral (low confidence)                   | AZOBR_100066 | Ancestral (medium confidence)                |
| AZOLI_1604 | Ancestral (medium confidence)                | AZOBR_100067 | Horizontally Transferred (high confidence)   |
| AZOLI_1605 | Ancestral (high confidence)                  | AZOBR_100068 | Ancestral (low confidence)                   |
| AZOLI_1606 | Ancestral (high confidence)                  | AZOBR_100069 | Ancestral (medium confidence)                |
| AZOLI_1608 | Horizontally Transferred (medium confidence) | AZOBR_100070 | Ancestral (high confidence)                  |
| AZOLI_1609 | Ancestral (medium confidence)                | AZOBR_100071 | Ancestral (low confidence)                   |
| AZOLI_1610 | Ancestral (medium confidence)                | AZOBR_100072 | Ancestral (medium confidence)                |
| AZOLI_1611 | Ancestral (high confidence)                  | AZOBR_100073 | Ancestral (medium confidence)                |
| AZOLI_1612 | Horizontally Transferred (high confidence)   | AZOBR_100074 | Unassigned                                   |
| AZOLI_1613 | Ancestral (high confidence)                  | AZOBR_100075 | Ancestral (medium confidence)                |
| AZOLI_1614 | Ancestral (medium confidence)                | AZOBR_100076 | Ancestral (low confidence)                   |
| AZOLI_1615 | Horizontally Transferred (high confidence)   | AZOBR_100077 | Ancestral (low confidence)                   |
| AZOLI_1616 | Horizontally Transferred (high confidence)   | AZOBR_100078 | Horizontally Transferred (high confidence)   |
| AZOLI_1617 | Horizontally Transferred (high confidence)   | AZOBR_100079 | Ancestral (medium confidence)                |
| AZOLI_1618 | Ancestral (medium confidence)                | AZOBR_100080 | Ancestral (low confidence)                   |
| AZOLI_1619 | Ancestral (low confidence)                   | AZOBR_100081 | Ancestral (high confidence)                  |
| AZOLI_1621 | Ancestral (medium confidence)                | AZOBR_100082 | Ancestral (medium confidence)                |
| AZOLI_1622 | Ancestral (low confidence)                   | AZOBR_100083 | Horizontally Transferred (high confidence)   |
| AZOLI_1623 | Ancestral (medium confidence)                | AZOBR_100084 | Ancestral (medium confidence)                |
| AZOLI_1624 | Ancestral (medium confidence)                | AZOBR_100085 | Ancestral (high confidence)                  |
| AZOLI_1625 | Ancestral (low confidence)                   | AZOBR_100086 | Unassigned                                   |
| AZOLI_1626 | Ancestral (high confidence)                  | AZOBR_100087 | Ancestral (low confidence)                   |
| AZOLI_1627 | Ancestral (high confidence)                  | AZOBR_100088 | Ancestral (high confidence)                  |
| AZOLI_1628 | Ancestral (medium confidence)                | AZOBR_100089 | Ancestral (medium confidence)                |
| AZOLI_1629 | Ancestral (high confidence)                  | AZOBR_100090 | Ancestral (medium confidence)                |
| AZOLI_1630 | Ancestral (medium confidence)                | AZOBR_100091 | Horizontally Transferred (low confidence)    |
| AZOLI_1631 | Ancestral (high confidence)                  | AZOBR_100092 | Ancestral (medium confidence)                |

|            |                                              |              |                                              |
|------------|----------------------------------------------|--------------|----------------------------------------------|
| AZOLI_1632 | Ancestral (medium confidence)                | AZOBR_100093 | Horizontally Transferred (high confidence)   |
| AZOLI_1633 | Horizontally Transferred (high confidence)   | AZOBR_100094 | Unassigned                                   |
| AZOLI_1634 | Horizontally Transferred (high confidence)   | AZOBR_100095 | Horizontally Transferred (high confidence)   |
| AZOLI_1635 | Horizontally Transferred (high confidence)   | AZOBR_100096 | Horizontally Transferred (high confidence)   |
| AZOLI_1636 | Horizontally Transferred (high confidence)   | AZOBR_100097 | Horizontally Transferred (high confidence)   |
| AZOLI_1638 | Ancestral (low confidence)                   | AZOBR_100098 | Horizontally Transferred (low confidence)    |
| AZOLI_1639 | Ancestral (medium confidence)                | AZOBR_100099 | Ancestral (high confidence)                  |
| AZOLI_1640 | Unassigned                                   | AZOBR_100100 | Unassigned                                   |
| AZOLI_1641 | Ancestral (medium confidence)                | AZOBR_100101 | Ancestral (medium confidence)                |
| AZOLI_1642 | Ancestral (high confidence)                  | AZOBR_100102 | Ancestral (high confidence)                  |
| AZOLI_1643 | Ancestral (medium confidence)                | AZOBR_100103 | Ancestral (high confidence)                  |
| AZOLI_1644 | Ancestral (medium confidence)                | AZOBR_100104 | Ancestral (medium confidence)                |
| AZOLI_1645 | Horizontally Transferred (high confidence)   | AZOBR_100105 | Ancestral (high confidence)                  |
| AZOLI_1646 | Ancestral (medium confidence)                | AZOBR_100106 | Ancestral (high confidence)                  |
| AZOLI_1647 | Ancestral (low confidence)                   | AZOBR_100107 | Ancestral (low confidence)                   |
| AZOLI_1648 | Horizontally Transferred (low confidence)    | AZOBR_100108 | Ancestral (high confidence)                  |
| AZOLI_1649 | Horizontally Transferred (low confidence)    | AZOBR_100109 | Horizontally Transferred (high confidence)   |
| AZOLI_1651 | Horizontally Transferred (high confidence)   | AZOBR_100110 | Ancestral (high confidence)                  |
| AZOLI_1653 | Horizontally Transferred (high confidence)   | AZOBR_100111 | Ancestral (medium confidence)                |
| AZOLI_1654 | Ancestral (medium confidence)                | AZOBR_100112 | Ancestral (high confidence)                  |
| AZOLI_1656 | Horizontally Transferred (high confidence)   | AZOBR_100113 | Ancestral (high confidence)                  |
| AZOLI_1657 | Ancestral (high confidence)                  | AZOBR_100114 | Horizontally Transferred (high confidence)   |
| AZOLI_1658 | Ancestral (high confidence)                  | AZOBR_100115 | Unassigned                                   |
| AZOLI_1659 | Unassigned                                   | AZOBR_100116 | Ancestral (high confidence)                  |
| AZOLI_1660 | Horizontally Transferred (high confidence)   | AZOBR_100117 | Ancestral (high confidence)                  |
| AZOLI_1661 | Horizontally Transferred (high confidence)   | AZOBR_100118 | Ancestral (high confidence)                  |
| AZOLI_1662 | Horizontally Transferred (high confidence)   | AZOBR_100119 | Ancestral (high confidence)                  |
| AZOLI_1663 | Horizontally Transferred (high confidence)   | AZOBR_100120 | Ancestral (medium confidence)                |
| AZOLI_1664 | Horizontally Transferred (high confidence)   | AZOBR_100121 | Unassigned                                   |
| AZOLI_1665 | Horizontally Transferred (high confidence)   | AZOBR_100122 | Horizontally Transferred (high confidence)   |
| AZOLI_1666 | Ancestral (medium confidence)                | AZOBR_100123 | Ancestral (medium confidence)                |
| AZOLI_1667 | Ancestral (medium confidence)                | AZOBR_100124 | Ancestral (medium confidence)                |
| AZOLI_1668 | Ancestral (medium confidence)                | AZOBR_100125 | Unassigned                                   |
| AZOLI_1669 | Ancestral (high confidence)                  | AZOBR_100126 | Ancestral (medium confidence)                |
| AZOLI_1670 | Ancestral (high confidence)                  | AZOBR_100127 | Ancestral (low confidence)                   |
| AZOLI_1671 | Ancestral (high confidence)                  | AZOBR_100128 | Ancestral (low confidence)                   |
| AZOLI_1672 | Unassigned                                   | AZOBR_100129 | Horizontally Transferred (high confidence)   |
| AZOLI_1673 | Ancestral (high confidence)                  | AZOBR_100130 | Horizontally Transferred (high confidence)   |
| AZOLI_1674 | Ancestral (high confidence)                  | AZOBR_100131 | Ancestral (medium confidence)                |
| AZOLI_1675 | Horizontally Transferred (high confidence)   | AZOBR_100132 | Unassigned                                   |
| AZOLI_1676 | Ancestral (medium confidence)                | AZOBR_100133 | Horizontally Transferred (high confidence)   |
| AZOLI_1677 | Ancestral (low confidence)                   | AZOBR_100134 | Ancestral (high confidence)                  |
| AZOLI_1678 | Ancestral (high confidence)                  | AZOBR_100135 | Unassigned                                   |
| AZOLI_1679 | Ancestral (high confidence)                  | AZOBR_100136 | Ancestral (low confidence)                   |
| AZOLI_1680 | Ancestral (medium confidence)                | AZOBR_100137 | Ancestral (low confidence)                   |
| AZOLI_1681 | Ancestral (high confidence)                  | AZOBR_100138 | Ancestral (low confidence)                   |
| AZOLI_1682 | Horizontally Transferred (high confidence)   | AZOBR_100139 | Ancestral (low confidence)                   |
| AZOLI_1683 | Unassigned                                   | AZOBR_100140 | Unassigned                                   |
| AZOLI_1684 | Ancestral (low confidence)                   | AZOBR_100141 | Ancestral (medium confidence)                |
| AZOLI_1686 | Horizontally Transferred (medium confidence) | AZOBR_100142 | Horizontally Transferred (medium confidence) |
| AZOLI_1687 | Ancestral (medium confidence)                | AZOBR_100143 | Horizontally Transferred (high confidence)   |
| AZOLI_1688 | Ancestral (medium confidence)                | AZOBR_100144 | Horizontally Transferred (high confidence)   |
| AZOLI_1689 | Unassigned                                   | AZOBR_100145 | Ancestral (medium confidence)                |
| AZOLI_1690 | Ancestral (low confidence)                   | AZOBR_100146 | Ancestral (low confidence)                   |
| AZOLI_1691 | Horizontally Transferred (high confidence)   | AZOBR_100147 | Horizontally Transferred (high confidence)   |
| AZOLI_1692 | Horizontally Transferred (high confidence)   | AZOBR_100148 | Horizontally Transferred (high confidence)   |
| AZOLI_1693 | Unassigned                                   | AZOBR_100149 | Ancestral (medium confidence)                |
| AZOLI_1694 | Horizontally Transferred (high confidence)   | AZOBR_100150 | Ancestral (medium confidence)                |
| AZOLI_1701 | Unassigned                                   | AZOBR_100151 | Ancestral (medium confidence)                |
| AZOLI_1703 | Ancestral (medium confidence)                | AZOBR_100152 | Ancestral (low confidence)                   |
| AZOLI_1704 | Horizontally Transferred (high confidence)   | AZOBR_100153 | Ancestral (low confidence)                   |
| AZOLI_1705 | Ancestral (high confidence)                  | AZOBR_100154 | Unassigned                                   |
| AZOLI_1707 | Unassigned                                   | AZOBR_100155 | Unassigned                                   |
| AZOLI_1709 | Ancestral (high confidence)                  | AZOBR_100156 | Horizontally Transferred (high confidence)   |
| AZOLI_1711 | Unassigned                                   | AZOBR_100157 | Horizontally Transferred (low confidence)    |
| AZOLI_1713 | Ancestral (high confidence)                  | AZOBR_100158 | Horizontally Transferred (low confidence)    |
| AZOLI_1715 | Horizontally Transferred (high confidence)   | AZOBR_100159 | Ancestral (low confidence)                   |
| AZOLI_1716 | Unassigned                                   | AZOBR_100160 | Ancestral (low confidence)                   |
| AZOLI_1717 | Horizontally Transferred (high confidence)   | AZOBR_100161 | Ancestral (medium confidence)                |
| AZOLI_1718 | Ancestral (low confidence)                   | AZOBR_100162 | Ancestral (low confidence)                   |
| AZOLI_1719 | Ancestral (high confidence)                  | AZOBR_100163 | Horizontally Transferred (high confidence)   |
| AZOLI_1721 | Ancestral (high confidence)                  | AZOBR_100164 | Ancestral (low confidence)                   |
| AZOLI_1722 | Ancestral (high confidence)                  | AZOBR_100165 | Ancestral (low confidence)                   |
| AZOLI_1723 | Ancestral (high confidence)                  | AZOBR_100166 | Unassigned                                   |
| AZOLI_1724 | Ancestral (high confidence)                  | AZOBR_100167 | Horizontally Transferred (high confidence)   |

|            |                                              |              |                                            |
|------------|----------------------------------------------|--------------|--------------------------------------------|
| AZOLI_1725 | Ancestral (high confidence)                  | AZOBR_100168 | Ancestral (high confidence)                |
| AZOLI_1726 | Ancestral (high confidence)                  | AZOBR_100169 | Horizontally Transferred (high confidence) |
| AZOLI_1727 | Ancestral (medium confidence)                | AZOBR_100170 | Ancestral (medium confidence)              |
| AZOLI_1728 | Ancestral (low confidence)                   | AZOBR_100171 | Ancestral (high confidence)                |
| AZOLI_1729 | Ancestral (medium confidence)                | AZOBR_100172 | Ancestral (low confidence)                 |
| AZOLI_1731 | Ancestral (high confidence)                  | AZOBR_100173 | Horizontally Transferred (high confidence) |
| AZOLI_1732 | Ancestral (high confidence)                  | AZOBR_100174 | Ancestral (medium confidence)              |
| AZOLI_1733 | Ancestral (high confidence)                  | AZOBR_100175 | Ancestral (high confidence)                |
| AZOLI_1734 | Ancestral (high confidence)                  | AZOBR_100176 | Ancestral (medium confidence)              |
| AZOLI_1735 | Ancestral (high confidence)                  | AZOBR_100177 | Ancestral (medium confidence)              |
| AZOLI_1736 | Ancestral (high confidence)                  | AZOBR_100178 | Ancestral (high confidence)                |
| AZOLI_1737 | Unassigned                                   | AZOBR_100179 | Ancestral (high confidence)                |
| AZOLI_1738 | Ancestral (high confidence)                  | AZOBR_100180 | Ancestral (medium confidence)              |
| AZOLI_1739 | Ancestral (high confidence)                  | AZOBR_100181 | Horizontally Transferred (high confidence) |
| AZOLI_1740 | Ancestral (high confidence)                  | AZOBR_100182 | Unassigned                                 |
| AZOLI_1741 | Ancestral (medium confidence)                | AZOBR_100183 | Ancestral (high confidence)                |
| AZOLI_1743 | Unassigned                                   | AZOBR_100184 | Horizontally Transferred (high confidence) |
| AZOLI_1744 | Unassigned                                   | AZOBR_100185 | Ancestral (medium confidence)              |
| AZOLI_1748 | Ancestral (low confidence)                   | AZOBR_100186 | Ancestral (medium confidence)              |
| AZOLI_1751 | Ancestral (low confidence)                   | AZOBR_100187 | Ancestral (high confidence)                |
| AZOLI_1752 | Ancestral (medium confidence)                | AZOBR_100188 | Ancestral (low confidence)                 |
| AZOLI_1753 | Unassigned                                   | AZOBR_100189 | Ancestral (low confidence)                 |
| AZOLI_1755 | Horizontally Transferred (high confidence)   | AZOBR_100190 | Ancestral (high confidence)                |
| AZOLI_1756 | Horizontally Transferred (high confidence)   | AZOBR_100191 | Ancestral (high confidence)                |
| AZOLI_1757 | Ancestral (medium confidence)                | AZOBR_100192 | Ancestral (low confidence)                 |
| AZOLI_1758 | Unassigned                                   | AZOBR_100193 | Ancestral (low confidence)                 |
| AZOLI_1759 | Unassigned                                   | AZOBR_100194 | Unassigned                                 |
| AZOLI_1760 | Ancestral (low confidence)                   | AZOBR_100195 | Ancestral (high confidence)                |
| AZOLI_1761 | Ancestral (medium confidence)                | AZOBR_100196 | Unassigned                                 |
| AZOLI_1762 | Ancestral (low confidence)                   | AZOBR_100197 | Horizontally Transferred (high confidence) |
| AZOLI_1763 | Horizontally Transferred (high confidence)   | AZOBR_100198 | Ancestral (low confidence)                 |
| AZOLI_1764 | Unassigned                                   | AZOBR_100199 | Ancestral (low confidence)                 |
| AZOLI_1765 | Unassigned                                   | AZOBR_100200 | Ancestral (low confidence)                 |
| AZOLI_1766 | Horizontally Transferred (high confidence)   | AZOBR_100201 | Ancestral (low confidence)                 |
| AZOLI_1767 | Unassigned                                   | AZOBR_100202 | Horizontally Transferred (high confidence) |
| AZOLI_1768 | Unassigned                                   | AZOBR_100203 | Horizontally Transferred (low confidence)  |
| AZOLI_1769 | Ancestral (high confidence)                  | AZOBR_100204 | Unassigned                                 |
| AZOLI_1770 | Ancestral (low confidence)                   | AZOBR_100205 | Unassigned                                 |
| AZOLI_1771 | Ancestral (low confidence)                   | AZOBR_100206 | Horizontally Transferred (high confidence) |
| AZOLI_1772 | Ancestral (low confidence)                   | AZOBR_100207 | Horizontally Transferred (high confidence) |
| AZOLI_1773 | Unassigned                                   | AZOBR_100208 | Ancestral (low confidence)                 |
| AZOLI_1774 | Ancestral (medium confidence)                | AZOBR_100209 | Ancestral (medium confidence)              |
| AZOLI_1775 | Ancestral (low confidence)                   | AZOBR_100210 | Horizontally Transferred (high confidence) |
| AZOLI_1776 | Unassigned                                   | AZOBR_100211 | Horizontally Transferred (high confidence) |
| AZOLI_1777 | Ancestral (medium confidence)                | AZOBR_100212 | Horizontally Transferred (high confidence) |
| AZOLI_1778 | Horizontally Transferred (high confidence)   | AZOBR_100213 | Unassigned                                 |
| AZOLI_1779 | Unassigned                                   | AZOBR_100214 | Horizontally Transferred (high confidence) |
| AZOLI_1780 | Unassigned                                   | AZOBR_100215 | Ancestral (high confidence)                |
| AZOLI_1781 | Horizontally Transferred (low confidence)    | AZOBR_100216 | Ancestral (high confidence)                |
| AZOLI_1782 | Ancestral (high confidence)                  | AZOBR_100217 | Ancestral (high confidence)                |
| AZOLI_1783 | Unassigned                                   | AZOBR_100218 | Ancestral (low confidence)                 |
| AZOLI_1784 | Unassigned                                   | AZOBR_100219 | Horizontally Transferred (high confidence) |
| AZOLI_1785 | Ancestral (low confidence)                   | AZOBR_100220 | Ancestral (low confidence)                 |
| AZOLI_1786 | Unassigned                                   | AZOBR_100221 | Ancestral (low confidence)                 |
| AZOLI_1787 | Unassigned                                   | AZOBR_100222 | Unassigned                                 |
| AZOLI_1789 | Unassigned                                   | AZOBR_100223 | Ancestral (medium confidence)              |
| AZOLI_1790 | Unassigned                                   | AZOBR_100224 | Ancestral (medium confidence)              |
| AZOLI_1791 | Horizontally Transferred (medium confidence) | AZOBR_100225 | Ancestral (low confidence)                 |
| AZOLI_1792 | Horizontally Transferred (medium confidence) | AZOBR_100226 | Ancestral (low confidence)                 |
| AZOLI_1793 | Ancestral (low confidence)                   | AZOBR_100227 | Ancestral (low confidence)                 |
| AZOLI_1794 | Ancestral (low confidence)                   | AZOBR_100228 | Ancestral (high confidence)                |
| AZOLI_1795 | Unassigned                                   | AZOBR_100229 | Unassigned                                 |
| AZOLI_1796 | Unassigned                                   | AZOBR_100230 | Ancestral (high confidence)                |
| AZOLI_1797 | Ancestral (low confidence)                   | AZOBR_100231 | Unassigned                                 |
| AZOLI_1798 | Ancestral (high confidence)                  | AZOBR_100232 | Unassigned                                 |
| AZOLI_1799 | Ancestral (high confidence)                  | AZOBR_100233 | Ancestral (low confidence)                 |
| AZOLI_1800 | Ancestral (high confidence)                  | AZOBR_100234 | Ancestral (high confidence)                |
| AZOLI_1801 | Ancestral (high confidence)                  | AZOBR_100235 | Ancestral (high confidence)                |
| AZOLI_1802 | Ancestral (medium confidence)                | AZOBR_100236 | Ancestral (high confidence)                |
| AZOLI_1803 | Ancestral (high confidence)                  | AZOBR_100237 | Ancestral (high confidence)                |
| AZOLI_1804 | Ancestral (high confidence)                  | AZOBR_100238 | Unassigned                                 |
| AZOLI_1805 | Ancestral (low confidence)                   | AZOBR_100239 | Ancestral (high confidence)                |
| AZOLI_1806 | Ancestral (low confidence)                   | AZOBR_100240 | Unassigned                                 |
| AZOLI_1807 | Unassigned                                   | AZOBR_100241 | Ancestral (high confidence)                |
| AZOLI_1808 | Ancestral (medium confidence)                | AZOBR_100242 | Unassigned                                 |



|            |                                            |              |                                              |
|------------|--------------------------------------------|--------------|----------------------------------------------|
| AZOLI_1894 | Ancestral (high confidence)                | AZOBR_100318 | Ancestral (medium confidence)                |
| AZOLI_1895 | Horizontally Transferred (high confidence) | AZOBR_100319 | Horizontally Transferred (medium confidence) |
| AZOLI_1896 | Ancestral (high confidence)                | AZOBR_100320 | Horizontally Transferred (low confidence)    |
| AZOLI_1897 | Ancestral (medium confidence)              | AZOBR_100321 | Horizontally Transferred (low confidence)    |
| AZOLI_1898 | Ancestral (high confidence)                | AZOBR_100322 | Ancestral (low confidence)                   |
| AZOLI_1899 | Ancestral (low confidence)                 | AZOBR_100323 | Ancestral (low confidence)                   |
| AZOLI_1900 | Ancestral (low confidence)                 | AZOBR_100324 | Horizontally Transferred (high confidence)   |
| AZOLI_1901 | Ancestral (high confidence)                | AZOBR_100325 | Ancestral (high confidence)                  |
| AZOLI_1902 | Ancestral (high confidence)                | AZOBR_100326 | Ancestral (high confidence)                  |
| AZOLI_1903 | Unassigned                                 | AZOBR_100327 | Ancestral (high confidence)                  |
| AZOLI_1904 | Ancestral (medium confidence)              | AZOBR_100328 | Ancestral (high confidence)                  |
| AZOLI_1905 | Ancestral (medium confidence)              | AZOBR_100329 | Ancestral (high confidence)                  |
| AZOLI_1906 | Horizontally Transferred (high confidence) | AZOBR_100330 | Ancestral (low confidence)                   |
| AZOLI_1907 | Ancestral (low confidence)                 | AZOBR_100331 | Horizontally Transferred (high confidence)   |
| AZOLI_1908 | Unassigned                                 | AZOBR_100332 | Unassigned                                   |
| AZOLI_1909 | Ancestral (high confidence)                | AZOBR_100333 | Horizontally Transferred (high confidence)   |
| AZOLI_1910 | Ancestral (high confidence)                | AZOBR_100334 | Ancestral (low confidence)                   |
| AZOLI_1911 | Unassigned                                 | AZOBR_100335 | Horizontally Transferred (medium confidence) |
| AZOLI_1912 | Ancestral (high confidence)                | AZOBR_100336 | Ancestral (medium confidence)                |
| AZOLI_1913 | Ancestral (medium confidence)              | AZOBR_100337 | Ancestral (low confidence)                   |
| AZOLI_1914 | Ancestral (medium confidence)              | AZOBR_100338 | Horizontally Transferred (high confidence)   |
| AZOLI_1915 | Ancestral (high confidence)                | AZOBR_100339 | Unassigned                                   |
| AZOLI_1916 | Ancestral (medium confidence)              | AZOBR_100340 | Ancestral (medium confidence)                |
| AZOLI_1917 | Ancestral (high confidence)                | AZOBR_100341 | Ancestral (medium confidence)                |
| AZOLI_1918 | Ancestral (high confidence)                | AZOBR_100342 | Ancestral (medium confidence)                |
| AZOLI_1919 | Ancestral (medium confidence)              | AZOBR_100343 | Ancestral (medium confidence)                |
| AZOLI_1920 | Unassigned                                 | AZOBR_100344 | Horizontally Transferred (medium confidence) |
| AZOLI_1921 | Ancestral (low confidence)                 | AZOBR_100345 | Ancestral (high confidence)                  |
| AZOLI_1922 | Ancestral (high confidence)                | AZOBR_100346 | Ancestral (medium confidence)                |
| AZOLI_1924 | Unassigned                                 | AZOBR_100347 | Horizontally Transferred (medium confidence) |
| AZOLI_1925 | Horizontally Transferred (high confidence) | AZOBR_100348 | Ancestral (low confidence)                   |
| AZOLI_1926 | Horizontally Transferred (high confidence) | AZOBR_100349 | Ancestral (medium confidence)                |
| AZOLI_1927 | Horizontally Transferred (high confidence) | AZOBR_100350 | Horizontally Transferred (high confidence)   |
| AZOLI_1928 | Ancestral (low confidence)                 | AZOBR_100351 | Horizontally Transferred (high confidence)   |
| AZOLI_1930 | Horizontally Transferred (high confidence) | AZOBR_100352 | Horizontally Transferred (high confidence)   |
| AZOLI_1931 | Ancestral (high confidence)                | AZOBR_100353 | Horizontally Transferred (high confidence)   |
| AZOLI_1932 | Unassigned                                 | AZOBR_100354 | Horizontally Transferred (high confidence)   |
| AZOLI_1936 | Unassigned                                 | AZOBR_100355 | Ancestral (low confidence)                   |
| AZOLI_1938 | Unassigned                                 | AZOBR_100356 | Ancestral (high confidence)                  |
| AZOLI_1939 | Horizontally Transferred (low confidence)  | AZOBR_100357 | Ancestral (medium confidence)                |
| AZOLI_1940 | Unassigned                                 | AZOBR_100358 | Ancestral (low confidence)                   |
| AZOLI_1941 | Unassigned                                 | AZOBR_100359 | Ancestral (low confidence)                   |
| AZOLI_1942 | Horizontally Transferred (high confidence) | AZOBR_100360 | Ancestral (medium confidence)                |
| AZOLI_1943 | Unassigned                                 | AZOBR_100361 | Ancestral (high confidence)                  |
| AZOLI_1944 | Horizontally Transferred (high confidence) | AZOBR_100362 | Unassigned                                   |
| AZOLI_1945 | Unassigned                                 | AZOBR_100363 | Horizontally Transferred (high confidence)   |
| AZOLI_1946 | Ancestral (high confidence)                | AZOBR_100364 | Ancestral (low confidence)                   |
| AZOLI_1947 | Ancestral (high confidence)                | AZOBR_100365 | Unassigned                                   |
| AZOLI_1948 | Unassigned                                 | AZOBR_100366 | Unassigned                                   |
| AZOLI_1949 | Ancestral (low confidence)                 | AZOBR_100367 | Unassigned                                   |
| AZOLI_1950 | Horizontally Transferred (high confidence) | AZOBR_100368 | Ancestral (medium confidence)                |
| AZOLI_1951 | Ancestral (high confidence)                | AZOBR_100369 | Ancestral (medium confidence)                |
| AZOLI_1952 | Ancestral (high confidence)                | AZOBR_100370 | Ancestral (medium confidence)                |
| AZOLI_1953 | Horizontally Transferred (low confidence)  | AZOBR_100371 | Ancestral (high confidence)                  |
| AZOLI_1954 | Ancestral (low confidence)                 | AZOBR_100372 | Ancestral (medium confidence)                |
| AZOLI_1955 | Ancestral (low confidence)                 | AZOBR_100373 | Ancestral (high confidence)                  |
| AZOLI_1956 | Horizontally Transferred (high confidence) | AZOBR_100374 | Ancestral (medium confidence)                |
| AZOLI_1957 | Ancestral (low confidence)                 | AZOBR_100375 | Ancestral (high confidence)                  |
| AZOLI_1958 | Horizontally Transferred (high confidence) | AZOBR_100376 | Unassigned                                   |
| AZOLI_1959 | Unassigned                                 | AZOBR_100377 | Ancestral (medium confidence)                |
| AZOLI_1960 | Ancestral (medium confidence)              | AZOBR_100378 | Ancestral (high confidence)                  |
| AZOLI_1961 | Ancestral (low confidence)                 | AZOBR_100379 | Ancestral (low confidence)                   |
| AZOLI_1962 | Ancestral (high confidence)                | AZOBR_100380 | Ancestral (high confidence)                  |
| AZOLI_1963 | Ancestral (low confidence)                 | AZOBR_100381 | Ancestral (medium confidence)                |
| AZOLI_1964 | Horizontally Transferred (high confidence) | AZOBR_100382 | Ancestral (medium confidence)                |
| AZOLI_1965 | Ancestral (low confidence)                 | AZOBR_100383 | Ancestral (high confidence)                  |
| AZOLI_1966 | Horizontally Transferred (high confidence) | AZOBR_100384 | Horizontally Transferred (high confidence)   |
| AZOLI_1967 | Horizontally Transferred (high confidence) | AZOBR_100385 | Horizontally Transferred (high confidence)   |
| AZOLI_1968 | Horizontally Transferred (high confidence) | AZOBR_100386 | Unassigned                                   |
| AZOLI_1969 | Ancestral (high confidence)                | AZOBR_100387 | Unassigned                                   |
| AZOLI_1970 | Ancestral (high confidence)                | AZOBR_100388 | Ancestral (high confidence)                  |
| AZOLI_1971 | Unassigned                                 | AZOBR_100389 | Ancestral (medium confidence)                |
| AZOLI_1972 | Ancestral (high confidence)                | AZOBR_100390 | Ancestral (medium confidence)                |
| AZOLI_1973 | Ancestral (high confidence)                | AZOBR_100391 | Horizontally Transferred (high confidence)   |
| AZOLI_1974 | Ancestral (high confidence)                | AZOBR_100392 | Horizontally Transferred (medium confidence) |



|            |                                              |              |                                              |
|------------|----------------------------------------------|--------------|----------------------------------------------|
| AZOLI_1975 | Ancestral (high confidence)                  | AZOBR_100393 | Horizontally Transferred (high confidence)   |
| AZOLI_1976 | Ancestral (high confidence)                  | AZOBR_100394 | Unassigned                                   |
| AZOLI_1977 | Unassigned                                   | AZOBR_100395 | Unassigned                                   |
| AZOLI_1978 | Ancestral (high confidence)                  | AZOBR_100396 | Ancestral (low confidence)                   |
| AZOLI_1979 | Ancestral (high confidence)                  | AZOBR_100397 | Ancestral (high confidence)                  |
| AZOLI_1980 | Ancestral (low confidence)                   | AZOBR_100398 | Ancestral (high confidence)                  |
| AZOLI_1981 | Horizontally Transferred (medium confidence) | AZOBR_100399 | Horizontally Transferred (high confidence)   |
| AZOLI_1982 | Horizontally Transferred (low confidence)    | AZOBR_100400 | Horizontally Transferred (high confidence)   |
| AZOLI_1984 | Horizontally Transferred (high confidence)   | AZOBR_100401 | Unassigned                                   |
| AZOLI_1985 | Horizontally Transferred (high confidence)   | AZOBR_100402 | Horizontally Transferred (high confidence)   |
| AZOLI_1986 | Horizontally Transferred (high confidence)   | AZOBR_100403 | Unassigned                                   |
| AZOLI_1987 | Unassigned                                   | AZOBR_100404 | Ancestral (low confidence)                   |
| AZOLI_1988 | Horizontally Transferred (medium confidence) | AZOBR_100405 | Horizontally Transferred (high confidence)   |
| AZOLI_1989 | Unassigned                                   | AZOBR_100406 | Horizontally Transferred (high confidence)   |
| AZOLI_1994 | Horizontally Transferred (high confidence)   | AZOBR_100407 | Unassigned                                   |
| AZOLI_1995 | Unassigned                                   | AZOBR_100408 | Ancestral (low confidence)                   |
| AZOLI_1996 | Horizontally Transferred (high confidence)   | AZOBR_100409 | Ancestral (high confidence)                  |
| AZOLI_1997 | Ancestral (high confidence)                  | AZOBR_100410 | Ancestral (medium confidence)                |
| AZOLI_1998 | Ancestral (low confidence)                   | AZOBR_100411 | Horizontally Transferred (high confidence)   |
| AZOLI_1999 | Horizontally Transferred (high confidence)   | AZOBR_100412 | Horizontally Transferred (high confidence)   |
| AZOLI_2000 | Horizontally Transferred (high confidence)   | AZOBR_110001 | Horizontally Transferred (high confidence)   |
| AZOLI_2001 | Horizontally Transferred (low confidence)    | AZOBR_110002 | Unassigned                                   |
| AZOLI_2002 | Unassigned                                   | AZOBR_110003 | Ancestral (medium confidence)                |
| AZOLI_2004 | Horizontally Transferred (high confidence)   | AZOBR_110004 | Horizontally Transferred (high confidence)   |
| AZOLI_2005 | Unassigned                                   | AZOBR_110005 | Horizontally Transferred (medium confidence) |
| AZOLI_2006 | Ancestral (low confidence)                   | AZOBR_110006 | Horizontally Transferred (high confidence)   |
| AZOLI_2007 | Ancestral (low confidence)                   | AZOBR_110007 | Horizontally Transferred (high confidence)   |
| AZOLI_2008 | Ancestral (low confidence)                   | AZOBR_110008 | Horizontally Transferred (high confidence)   |
| AZOLI_2010 | Ancestral (low confidence)                   | AZOBR_110009 | Unassigned                                   |
| AZOLI_2011 | Horizontally Transferred (high confidence)   | AZOBR_110010 | Unassigned                                   |
| AZOLI_2012 | Unassigned                                   | AZOBR_110011 | Horizontally Transferred (high confidence)   |
| AZOLI_2013 | Horizontally Transferred (high confidence)   | AZOBR_110012 | Ancestral (high confidence)                  |
| AZOLI_2015 | Unassigned                                   | AZOBR_110013 | Ancestral (medium confidence)                |
| AZOLI_2016 | Horizontally Transferred (high confidence)   | AZOBR_110014 | Horizontally Transferred (high confidence)   |
| AZOLI_2017 | Horizontally Transferred (high confidence)   | AZOBR_110015 | Ancestral (low confidence)                   |
| AZOLI_2018 | Horizontally Transferred (high confidence)   | AZOBR_110016 | Horizontally Transferred (medium confidence) |
| AZOLI_2019 | Horizontally Transferred (high confidence)   | AZOBR_110017 | Unassigned                                   |
| AZOLI_2020 | Ancestral (low confidence)                   | AZOBR_110018 | Ancestral (low confidence)                   |
| AZOLI_2021 | Ancestral (low confidence)                   | AZOBR_110019 | Ancestral (low confidence)                   |
| AZOLI_2022 | Ancestral (medium confidence)                | AZOBR_110020 | Ancestral (medium confidence)                |
| AZOLI_2023 | Ancestral (low confidence)                   | AZOBR_110021 | Horizontally Transferred (high confidence)   |
| AZOLI_2024 | Unassigned                                   | AZOBR_110022 | Horizontally Transferred (high confidence)   |
| AZOLI_2025 | Ancestral (low confidence)                   | AZOBR_110023 | Horizontally Transferred (medium confidence) |
| AZOLI_2026 | Horizontally Transferred (high confidence)   | AZOBR_110024 | Horizontally Transferred (high confidence)   |
| AZOLI_2027 | Horizontally Transferred (high confidence)   | AZOBR_110025 | Ancestral (low confidence)                   |
| AZOLI_2028 | Unassigned                                   | AZOBR_110026 | Ancestral (low confidence)                   |
| AZOLI_2029 | Horizontally Transferred (medium confidence) | AZOBR_110027 | Ancestral (medium confidence)                |
| AZOLI_2030 | Unassigned                                   | AZOBR_110028 | Horizontally Transferred (high confidence)   |
| AZOLI_2031 | Horizontally Transferred (medium confidence) | AZOBR_110029 | Horizontally Transferred (high confidence)   |
| AZOLI_2032 | Unassigned                                   | AZOBR_110030 | Ancestral (medium confidence)                |
| AZOLI_2033 | Unassigned                                   | AZOBR_110031 | Horizontally Transferred (low confidence)    |
| AZOLI_2034 | Horizontally Transferred (high confidence)   | AZOBR_110032 | Unassigned                                   |
| AZOLI_2035 | Horizontally Transferred (high confidence)   | AZOBR_110033 | Ancestral (low confidence)                   |
| AZOLI_2036 | Unassigned                                   | AZOBR_110034 | Ancestral (low confidence)                   |
| AZOLI_2037 | Horizontally Transferred (medium confidence) | AZOBR_110035 | Unassigned                                   |
| AZOLI_2038 | Horizontally Transferred (high confidence)   | AZOBR_110036 | Ancestral (low confidence)                   |
| AZOLI_2039 | Horizontally Transferred (high confidence)   | AZOBR_110037 | Horizontally Transferred (low confidence)    |
| AZOLI_2040 | Horizontally Transferred (low confidence)    | AZOBR_110038 | Horizontally Transferred (high confidence)   |
| AZOLI_2041 | Unassigned                                   | AZOBR_110039 | Horizontally Transferred (high confidence)   |
| AZOLI_2043 | Horizontally Transferred (high confidence)   | AZOBR_110040 | Unassigned                                   |
| AZOLI_2045 | Unassigned                                   | AZOBR_110041 | Horizontally Transferred (high confidence)   |
| AZOLI_2046 | Unassigned                                   | AZOBR_110042 | Unassigned                                   |
| AZOLI_2047 | Unassigned                                   | AZOBR_110043 | Ancestral (medium confidence)                |
| AZOLI_2048 | Unassigned                                   | AZOBR_110044 | Horizontally Transferred (high confidence)   |
| AZOLI_2049 | Horizontally Transferred (high confidence)   | AZOBR_110045 | Ancestral (low confidence)                   |
| AZOLI_2050 | Horizontally Transferred (high confidence)   | AZOBR_110046 | Unassigned                                   |
| AZOLI_2051 | Horizontally Transferred (high confidence)   | AZOBR_110047 | Unassigned                                   |
| AZOLI_2052 | Ancestral (low confidence)                   | AZOBR_110048 | Ancestral (medium confidence)                |
| AZOLI_2053 | Ancestral (low confidence)                   | AZOBR_110049 | Ancestral (low confidence)                   |
| AZOLI_2054 | Unassigned                                   | AZOBR_110050 | Ancestral (medium confidence)                |
| AZOLI_2055 | Horizontally Transferred (high confidence)   | AZOBR_110051 | Ancestral (low confidence)                   |
| AZOLI_2056 | Ancestral (medium confidence)                | AZOBR_110052 | Ancestral (high confidence)                  |
| AZOLI_2057 | Horizontally Transferred (high confidence)   | AZOBR_110053 | Ancestral (low confidence)                   |
| AZOLI_2058 | Horizontally Transferred (high confidence)   | AZOBR_110054 | Ancestral (low confidence)                   |
| AZOLI_2059 | Horizontally Transferred (high confidence)   | AZOBR_110055 | Unassigned                                   |

|            |                                              |              |                                              |
|------------|----------------------------------------------|--------------|----------------------------------------------|
| AZOLI_2060 | Ancestral (medium confidence)                | AZOBR_110056 | Horizontally Transferred (high confidence)   |
| AZOLI_2061 | Horizontally Transferred (low confidence)    | AZOBR_110057 | Ancestral (low confidence)                   |
| AZOLI_2062 | Horizontally Transferred (high confidence)   | AZOBR_110058 | Unassigned                                   |
| AZOLI_2063 | Horizontally Transferred (high confidence)   | AZOBR_110059 | Ancestral (low confidence)                   |
| AZOLI_2064 | Horizontally Transferred (high confidence)   | AZOBR_110060 | Ancestral (medium confidence)                |
| AZOLI_2065 | Horizontally Transferred (high confidence)   | AZOBR_110061 | Ancestral (high confidence)                  |
| AZOLI_2066 | Horizontally Transferred (high confidence)   | AZOBR_110062 | Horizontally Transferred (high confidence)   |
| AZOLI_2067 | Unassigned                                   | AZOBR_110063 | Horizontally Transferred (high confidence)   |
| AZOLI_2068 | Horizontally Transferred (high confidence)   | AZOBR_110064 | Horizontally Transferred (high confidence)   |
| AZOLI_2070 | Horizontally Transferred (high confidence)   | AZOBR_110065 | Ancestral (high confidence)                  |
| AZOLI_2071 | Horizontally Transferred (medium confidence) | AZOBR_110066 | Ancestral (low confidence)                   |
| AZOLI_2072 | Horizontally Transferred (medium confidence) | AZOBR_110067 | Horizontally Transferred (medium confidence) |
| AZOLI_2073 | Unassigned                                   | AZOBR_110068 | Ancestral (low confidence)                   |
| AZOLI_2076 | Unassigned                                   | AZOBR_110069 | Horizontally Transferred (high confidence)   |
| AZOLI_2077 | Ancestral (low confidence)                   | AZOBR_110070 | Ancestral (medium confidence)                |
| AZOLI_2078 | Ancestral (low confidence)                   | AZOBR_110071 | Ancestral (medium confidence)                |
| AZOLI_2079 | Horizontally Transferred (high confidence)   | AZOBR_110072 | Unassigned                                   |
| AZOLI_2080 | Unassigned                                   | AZOBR_110073 | Ancestral (medium confidence)                |
| AZOLI_2081 | Unassigned                                   | AZOBR_110074 | Ancestral (high confidence)                  |
| AZOLI_2082 | Unassigned                                   | AZOBR_110075 | Ancestral (high confidence)                  |
| AZOLI_2083 | Unassigned                                   | AZOBR_110076 | Ancestral (high confidence)                  |
| AZOLI_2084 | Unassigned                                   | AZOBR_110077 | Ancestral (medium confidence)                |
| AZOLI_2085 | Horizontally Transferred (high confidence)   | AZOBR_110078 | Ancestral (high confidence)                  |
| AZOLI_2086 | Horizontally Transferred (high confidence)   | AZOBR_110079 | Ancestral (high confidence)                  |
| AZOLI_2088 | Ancestral (low confidence)                   | AZOBR_110080 | Ancestral (medium confidence)                |
| AZOLI_2089 | Horizontally Transferred (high confidence)   | AZOBR_110081 | Unassigned                                   |
| AZOLI_2090 | Ancestral (low confidence)                   | AZOBR_110082 | Ancestral (medium confidence)                |
| AZOLI_2091 | Unassigned                                   | AZOBR_110083 | Ancestral (medium confidence)                |
| AZOLI_2095 | Horizontally Transferred (high confidence)   | AZOBR_110084 | Ancestral (high confidence)                  |
| AZOLI_2096 | Unassigned                                   | AZOBR_110085 | Ancestral (low confidence)                   |
| AZOLI_2097 | Horizontally Transferred (high confidence)   | AZOBR_110086 | Ancestral (low confidence)                   |
| AZOLI_2098 | Horizontally Transferred (low confidence)    | AZOBR_110087 | Ancestral (low confidence)                   |
| AZOLI_2099 | Horizontally Transferred (high confidence)   | AZOBR_110088 | Ancestral (medium confidence)                |
| AZOLI_2100 | Horizontally Transferred (high confidence)   | AZOBR_110089 | Ancestral (high confidence)                  |
| AZOLI_2101 | Horizontally Transferred (high confidence)   | AZOBR_110090 | Ancestral (high confidence)                  |
| AZOLI_2102 | Unassigned                                   | AZOBR_110091 | Ancestral (high confidence)                  |
| AZOLI_2103 | Horizontally Transferred (high confidence)   | AZOBR_110092 | Ancestral (high confidence)                  |
| AZOLI_2104 | Ancestral (low confidence)                   | AZOBR_110093 | Ancestral (medium confidence)                |
| AZOLI_2105 | Ancestral (low confidence)                   | AZOBR_110094 | Horizontally Transferred (high confidence)   |
| AZOLI_2106 | Ancestral (low confidence)                   | AZOBR_110095 | Unassigned                                   |
| AZOLI_2107 | Unassigned                                   | AZOBR_110096 | Ancestral (high confidence)                  |
| AZOLI_2108 | Horizontally Transferred (high confidence)   | AZOBR_110097 | Ancestral (high confidence)                  |
| AZOLI_2109 | Horizontally Transferred (medium confidence) | AZOBR_110098 | Ancestral (high confidence)                  |
| AZOLI_2110 | Ancestral (low confidence)                   | AZOBR_110099 | Ancestral (high confidence)                  |
| AZOLI_2111 | Ancestral (medium confidence)                | AZOBR_110100 | Unassigned                                   |
| AZOLI_2112 | Unassigned                                   | AZOBR_110101 | Ancestral (low confidence)                   |
| AZOLI_2113 | Ancestral (medium confidence)                | AZOBR_110102 | Ancestral (high confidence)                  |
| AZOLI_2114 | Horizontally Transferred (high confidence)   | AZOBR_110103 | Ancestral (high confidence)                  |
| AZOLI_2115 | Ancestral (high confidence)                  | AZOBR_110104 | Ancestral (low confidence)                   |
| AZOLI_2116 | Ancestral (high confidence)                  | AZOBR_110105 | Ancestral (medium confidence)                |
| AZOLI_2117 | Ancestral (high confidence)                  | AZOBR_110106 | Ancestral (high confidence)                  |
| AZOLI_2118 | Ancestral (low confidence)                   | AZOBR_110107 | Ancestral (medium confidence)                |
| AZOLI_2120 | Unassigned                                   | AZOBR_110108 | Ancestral (high confidence)                  |
| AZOLI_2121 | Ancestral (medium confidence)                | AZOBR_110109 | Ancestral (high confidence)                  |
| AZOLI_2122 | Ancestral (high confidence)                  | AZOBR_110110 | Ancestral (high confidence)                  |
| AZOLI_2123 | Ancestral (high confidence)                  | AZOBR_110111 | Ancestral (medium confidence)                |
| AZOLI_2124 | Ancestral (high confidence)                  | AZOBR_110112 | Unassigned                                   |
| AZOLI_2125 | Ancestral (high confidence)                  | AZOBR_110113 | Ancestral (high confidence)                  |
| AZOLI_2126 | Ancestral (medium confidence)                | AZOBR_110114 | Ancestral (high confidence)                  |
| AZOLI_2127 | Ancestral (high confidence)                  | AZOBR_110115 | Ancestral (high confidence)                  |
| AZOLI_2128 | Ancestral (high confidence)                  | AZOBR_110116 | Horizontally Transferred (high confidence)   |
| AZOLI_2129 | Ancestral (high confidence)                  | AZOBR_110117 | Horizontally Transferred (high confidence)   |
| AZOLI_2130 | Ancestral (high confidence)                  | AZOBR_110118 | Horizontally Transferred (high confidence)   |
| AZOLI_2131 | Horizontally Transferred (high confidence)   | AZOBR_110119 | Horizontally Transferred (high confidence)   |
| AZOLI_2132 | Ancestral (high confidence)                  | AZOBR_110120 | Ancestral (high confidence)                  |
| AZOLI_2133 | Ancestral (medium confidence)                | AZOBR_110121 | Ancestral (medium confidence)                |
| AZOLI_2134 | Ancestral (medium confidence)                | AZOBR_110122 | Ancestral (medium confidence)                |
| AZOLI_2135 | Ancestral (medium confidence)                | AZOBR_110123 | Ancestral (high confidence)                  |
| AZOLI_2136 | Ancestral (high confidence)                  | AZOBR_110124 | Unassigned                                   |
| AZOLI_2137 | Ancestral (medium confidence)                | AZOBR_110125 | Ancestral (medium confidence)                |
| AZOLI_2140 | Ancestral (high confidence)                  | AZOBR_110126 | Horizontally Transferred (high confidence)   |
| AZOLI_2141 | Unassigned                                   | AZOBR_110127 | Ancestral (medium confidence)                |
| AZOLI_2142 | Ancestral (medium confidence)                | AZOBR_110128 | Ancestral (medium confidence)                |
| AZOLI_2143 | Ancestral (medium confidence)                | AZOBR_110129 | Unassigned                                   |
| AZOLI_2144 | Horizontally Transferred (high confidence)   | AZOBR_110130 | Unassigned                                   |



|            |                                              |              |                                            |
|------------|----------------------------------------------|--------------|--------------------------------------------|
| AZOLI_2226 | Horizontally Transferred (high confidence)   | AZOBR_130010 | Horizontally Transferred (high confidence) |
| AZOLI_2228 | Ancestral (high confidence)                  | AZOBR_130011 | Horizontally Transferred (high confidence) |
| AZOLI_2229 | Ancestral (high confidence)                  | AZOBR_130012 | Ancestral (low confidence)                 |
| AZOLI_2230 | Ancestral (high confidence)                  | AZOBR_130013 | Unassigned                                 |
| AZOLI_2231 | Ancestral (high confidence)                  | AZOBR_130014 | Ancestral (high confidence)                |
| AZOLI_2232 | Ancestral (high confidence)                  | AZOBR_130015 | Ancestral (medium confidence)              |
| AZOLI_2234 | Horizontally Transferred (high confidence)   | AZOBR_130016 | Ancestral (medium confidence)              |
| AZOLI_2235 | Horizontally Transferred (high confidence)   | AZOBR_130017 | Ancestral (medium confidence)              |
| AZOLI_2236 | Ancestral (high confidence)                  | AZOBR_130018 | Ancestral (medium confidence)              |
| AZOLI_2237 | Ancestral (medium confidence)                | AZOBR_130019 | Ancestral (low confidence)                 |
| AZOLI_2238 | Horizontally Transferred (high confidence)   | AZOBR_130020 | Ancestral (medium confidence)              |
| AZOLI_2239 | Ancestral (high confidence)                  | AZOBR_130021 | Ancestral (low confidence)                 |
| AZOLI_2240 | Ancestral (high confidence)                  | AZOBR_130022 | Horizontally Transferred (high confidence) |
| AZOLI_2241 | Ancestral (high confidence)                  | AZOBR_130023 | Horizontally Transferred (high confidence) |
| AZOLI_2242 | Horizontally Transferred (medium confidence) | AZOBR_130024 | Ancestral (low confidence)                 |
| AZOLI_2244 | Horizontally Transferred (high confidence)   | AZOBR_130025 | Ancestral (low confidence)                 |
| AZOLI_2245 | Horizontally Transferred (high confidence)   | AZOBR_130026 | Ancestral (high confidence)                |
| AZOLI_2246 | Ancestral (low confidence)                   | AZOBR_130027 | Ancestral (high confidence)                |
| AZOLI_2247 | Ancestral (low confidence)                   | AZOBR_130028 | Ancestral (low confidence)                 |
| AZOLI_2248 | Ancestral (low confidence)                   | AZOBR_130029 | Ancestral (medium confidence)              |
| AZOLI_2249 | Ancestral (low confidence)                   | AZOBR_130030 | Ancestral (high confidence)                |
| AZOLI_2250 | Ancestral (low confidence)                   | AZOBR_130031 | Horizontally Transferred (high confidence) |
| AZOLI_2251 | Horizontally Transferred (medium confidence) | AZOBR_130032 | Ancestral (low confidence)                 |
| AZOLI_2252 | Horizontally Transferred (low confidence)    | AZOBR_130033 | Horizontally Transferred (high confidence) |
| AZOLI_2253 | Ancestral (medium confidence)                | AZOBR_130034 | Ancestral (medium confidence)              |
| AZOLI_2254 | Ancestral (high confidence)                  | AZOBR_130035 | Horizontally Transferred (high confidence) |
| AZOLI_2255 | Unassigned                                   | AZOBR_130036 | Horizontally Transferred (high confidence) |
| AZOLI_2256 | Ancestral (low confidence)                   | AZOBR_130037 | Ancestral (high confidence)                |
| AZOLI_2257 | Ancestral (low confidence)                   | AZOBR_130038 | Ancestral (high confidence)                |
| AZOLI_2258 | Horizontally Transferred (high confidence)   | AZOBR_130039 | Ancestral (medium confidence)              |
| AZOLI_2259 | Ancestral (medium confidence)                | AZOBR_130040 | Ancestral (low confidence)                 |
| AZOLI_2260 | Ancestral (high confidence)                  | AZOBR_130041 | Ancestral (high confidence)                |
| AZOLI_2261 | Ancestral (medium confidence)                | AZOBR_130042 | Ancestral (high confidence)                |
| AZOLI_2262 | Unassigned                                   | AZOBR_130043 | Unassigned                                 |
| AZOLI_2263 | Unassigned                                   | AZOBR_130044 | Ancestral (high confidence)                |
| AZOLI_2264 | Ancestral (medium confidence)                | AZOBR_130045 | Unassigned                                 |
| AZOLI_2265 | Ancestral (high confidence)                  | AZOBR_130046 | Ancestral (low confidence)                 |
| AZOLI_2266 | Ancestral (high confidence)                  | AZOBR_130050 | Unassigned                                 |
| AZOLI_2267 | Horizontally Transferred (high confidence)   | AZOBR_130051 | Horizontally Transferred (high confidence) |
| AZOLI_2268 | Ancestral (low confidence)                   | AZOBR_140001 | Ancestral (low confidence)                 |
| AZOLI_2269 | Unassigned                                   | AZOBR_140002 | Ancestral (medium confidence)              |
| AZOLI_2270 | Ancestral (high confidence)                  | AZOBR_140003 | Unassigned                                 |
| AZOLI_2271 | Ancestral (high confidence)                  | AZOBR_140004 | Horizontally Transferred (high confidence) |
| AZOLI_2272 | Horizontally Transferred (high confidence)   | AZOBR_140005 | Ancestral (medium confidence)              |
| AZOLI_2273 | Ancestral (high confidence)                  | AZOBR_140006 | Ancestral (low confidence)                 |
| AZOLI_2274 | Ancestral (high confidence)                  | AZOBR_140007 | Ancestral (high confidence)                |
| AZOLI_2275 | Ancestral (high confidence)                  | AZOBR_140008 | Unassigned                                 |
| AZOLI_2276 | Ancestral (low confidence)                   | AZOBR_140009 | Ancestral (high confidence)                |
| AZOLI_2277 | Ancestral (medium confidence)                | AZOBR_140010 | Ancestral (medium confidence)              |
| AZOLI_2278 | Unassigned                                   | AZOBR_140011 | Ancestral (high confidence)                |
| AZOLI_2280 | Ancestral (medium confidence)                | AZOBR_140012 | Ancestral (high confidence)                |
| AZOLI_2281 | Ancestral (medium confidence)                | AZOBR_140013 | Ancestral (high confidence)                |
| AZOLI_2282 | Ancestral (medium confidence)                | AZOBR_140014 | Ancestral (high confidence)                |
| AZOLI_2283 | Unassigned                                   | AZOBR_140015 | Ancestral (medium confidence)              |
| AZOLI_2284 | Ancestral (medium confidence)                | AZOBR_140016 | Ancestral (low confidence)                 |
| AZOLI_2285 | Ancestral (high confidence)                  | AZOBR_140017 | Ancestral (high confidence)                |
| AZOLI_2286 | Ancestral (high confidence)                  | AZOBR_140018 | Ancestral (high confidence)                |
| AZOLI_2287 | Ancestral (high confidence)                  | AZOBR_140019 | Unassigned                                 |
| AZOLI_2288 | Ancestral (high confidence)                  | AZOBR_140020 | Ancestral (high confidence)                |
| AZOLI_2289 | Unassigned                                   | AZOBR_140021 | Unassigned                                 |
| AZOLI_2290 | Ancestral (high confidence)                  | AZOBR_140022 | Ancestral (high confidence)                |
| AZOLI_2291 | Ancestral (high confidence)                  | AZOBR_140023 | Ancestral (low confidence)                 |
| AZOLI_2292 | Ancestral (low confidence)                   | AZOBR_140024 | Ancestral (high confidence)                |
| AZOLI_2293 | Unassigned                                   | AZOBR_140025 | Ancestral (medium confidence)              |
| AZOLI_2294 | Unassigned                                   | AZOBR_140026 | Unassigned                                 |
| AZOLI_2295 | Unassigned                                   | AZOBR_140027 | Horizontally Transferred (high confidence) |
| AZOLI_2296 | Horizontally Transferred (high confidence)   | AZOBR_140028 | Unassigned                                 |
| AZOLI_2297 | Horizontally Transferred (high confidence)   | AZOBR_140029 | Horizontally Transferred (high confidence) |
| AZOLI_2298 | Horizontally Transferred (high confidence)   | AZOBR_140030 | Ancestral (low confidence)                 |
| AZOLI_2300 | Horizontally Transferred (high confidence)   | AZOBR_140031 | Ancestral (high confidence)                |
| AZOLI_2302 | Ancestral (high confidence)                  | AZOBR_140032 | Ancestral (medium confidence)              |
| AZOLI_2303 | Ancestral (medium confidence)                | AZOBR_140033 | Horizontally Transferred (high confidence) |
| AZOLI_2304 | Ancestral (high confidence)                  | AZOBR_140034 | Horizontally Transferred (high confidence) |
| AZOLI_2305 | Ancestral (low confidence)                   | AZOBR_140035 | Horizontally Transferred (high confidence) |
| AZOLI_2308 | Ancestral (medium confidence)                | AZOBR_140036 | Unassigned                                 |





|            |                                              |              |                                              |
|------------|----------------------------------------------|--------------|----------------------------------------------|
| AZOLI_2467 | Unassigned                                   | AZOBR_140187 | Ancestral (high confidence)                  |
| AZOLI_2468 | Ancestral (high confidence)                  | AZOBR_140188 | Ancestral (medium confidence)                |
| AZOLI_2469 | Ancestral (high confidence)                  | AZOBR_140189 | Ancestral (low confidence)                   |
| AZOLI_2470 | Ancestral (high confidence)                  | AZOBR_140190 | Horizontally Transferred (medium confidence) |
| AZOLI_2471 | Ancestral (high confidence)                  | AZOBR_140191 | Horizontally Transferred (medium confidence) |
| AZOLI_2473 | Ancestral (low confidence)                   | AZOBR_140192 | Ancestral (medium confidence)                |
| AZOLI_2474 | Ancestral (medium confidence)                | AZOBR_140193 | Unassigned                                   |
| AZOLI_2475 | Ancestral (high confidence)                  | AZOBR_140194 | Ancestral (high confidence)                  |
| AZOLI_2476 | Ancestral (high confidence)                  | AZOBR_140195 | Unassigned                                   |
| AZOLI_2477 | Unassigned                                   | AZOBR_140196 | Unassigned                                   |
| AZOLI_2478 | Ancestral (medium confidence)                | AZOBR_140197 | Unassigned                                   |
| AZOLI_2479 | Ancestral (high confidence)                  | AZOBR_140198 | Unassigned                                   |
| AZOLI_2480 | Horizontally Transferred (high confidence)   | AZOBR_140199 | Unassigned                                   |
| AZOLI_2482 | Ancestral (high confidence)                  | AZOBR_140200 | Unassigned                                   |
| AZOLI_2483 | Unassigned                                   | AZOBR_140201 | Ancestral (high confidence)                  |
| AZOLI_2484 | Ancestral (high confidence)                  | AZOBR_140202 | Ancestral (low confidence)                   |
| AZOLI_2485 | Horizontally Transferred (high confidence)   | AZOBR_140203 | Ancestral (low confidence)                   |
| AZOLI_2486 | Unassigned                                   | AZOBR_140204 | Horizontally Transferred (high confidence)   |
| AZOLI_2487 | Horizontally Transferred (medium confidence) | AZOBR_140205 | Ancestral (high confidence)                  |
| AZOLI_2488 | Ancestral (medium confidence)                | AZOBR_140206 | Ancestral (medium confidence)                |
| AZOLI_2490 | Ancestral (high confidence)                  | AZOBR_140207 | Unassigned                                   |
| AZOLI_2491 | Ancestral (high confidence)                  | AZOBR_140208 | Ancestral (low confidence)                   |
| AZOLI_2492 | Ancestral (high confidence)                  | AZOBR_140209 | Unassigned                                   |
| AZOLI_2493 | Ancestral (medium confidence)                | AZOBR_140210 | Horizontally Transferred (high confidence)   |
| AZOLI_2494 | Ancestral (high confidence)                  | AZOBR_140211 | Unassigned                                   |
| AZOLI_2495 | Ancestral (low confidence)                   | AZOBR_140212 | Ancestral (medium confidence)                |
| AZOLI_2496 | Horizontally Transferred (high confidence)   | AZOBR_140213 | Ancestral (high confidence)                  |
| AZOLI_2497 | Horizontally Transferred (high confidence)   | AZOBR_140214 | Horizontally Transferred (medium confidence) |
| AZOLI_2498 | Horizontally Transferred (high confidence)   | AZOBR_140215 | Horizontally Transferred (high confidence)   |
| AZOLI_2499 | Ancestral (low confidence)                   | AZOBR_140216 | Horizontally Transferred (high confidence)   |
| AZOLI_2500 | Ancestral (low confidence)                   | AZOBR_140217 | Ancestral (medium confidence)                |
| AZOLI_2501 | Ancestral (high confidence)                  | AZOBR_140218 | Unassigned                                   |
| AZOLI_2502 | Ancestral (medium confidence)                | AZOBR_140219 | Ancestral (medium confidence)                |
| AZOLI_2503 | Ancestral (low confidence)                   | AZOBR_140220 | Ancestral (medium confidence)                |
| AZOLI_2504 | Ancestral (high confidence)                  | AZOBR_140221 | Unassigned                                   |
| AZOLI_2505 | Ancestral (medium confidence)                | AZOBR_140222 | Ancestral (medium confidence)                |
| AZOLI_2506 | Unassigned                                   | AZOBR_140223 | Horizontally Transferred (high confidence)   |
| AZOLI_2507 | Horizontally Transferred (high confidence)   | AZOBR_140224 | Ancestral (low confidence)                   |
| AZOLI_2508 | Ancestral (high confidence)                  | AZOBR_140225 | Ancestral (medium confidence)                |
| AZOLI_2509 | Ancestral (medium confidence)                | AZOBR_140226 | Ancestral (medium confidence)                |
| AZOLI_2510 | Ancestral (high confidence)                  | AZOBR_140227 | Unassigned                                   |
| AZOLI_2511 | Ancestral (high confidence)                  | AZOBR_140228 | Ancestral (low confidence)                   |
| AZOLI_2512 | Horizontally Transferred (high confidence)   | AZOBR_140229 | Ancestral (low confidence)                   |
| AZOLI_2513 | Horizontally Transferred (high confidence)   | AZOBR_140230 | Ancestral (medium confidence)                |
| AZOLI_2514 | Unassigned                                   | AZOBR_140231 | Ancestral (medium confidence)                |
| AZOLI_2515 | Ancestral (medium confidence)                | AZOBR_140232 | Ancestral (low confidence)                   |
| AZOLI_2516 | Ancestral (low confidence)                   | AZOBR_140233 | Ancestral (high confidence)                  |
| AZOLI_2517 | Ancestral (high confidence)                  | AZOBR_140234 | Horizontally Transferred (high confidence)   |
| AZOLI_2518 | Ancestral (medium confidence)                | AZOBR_140235 | Ancestral (high confidence)                  |
| AZOLI_2519 | Ancestral (high confidence)                  | AZOBR_140236 | Unassigned                                   |
| AZOLI_2520 | Ancestral (low confidence)                   | AZOBR_140237 | Unassigned                                   |
| AZOLI_2521 | Ancestral (low confidence)                   | AZOBR_140238 | Ancestral (high confidence)                  |
| AZOLI_2522 | Horizontally Transferred (low confidence)    | AZOBR_140239 | Ancestral (medium confidence)                |
| AZOLI_2523 | Ancestral (low confidence)                   | AZOBR_140240 | Ancestral (high confidence)                  |
| AZOLI_2524 | Ancestral (medium confidence)                | AZOBR_140241 | Ancestral (high confidence)                  |
| AZOLI_2525 | Horizontally Transferred (high confidence)   | AZOBR_140242 | Ancestral (high confidence)                  |
| AZOLI_2526 | Ancestral (high confidence)                  | AZOBR_140243 | Ancestral (high confidence)                  |
| AZOLI_2527 | Unassigned                                   | AZOBR_140244 | Ancestral (medium confidence)                |
| AZOLI_2528 | Ancestral (medium confidence)                | AZOBR_140245 | Ancestral (low confidence)                   |
| AZOLI_2529 | Ancestral (medium confidence)                | AZOBR_140246 | Ancestral (medium confidence)                |
| AZOLI_2530 | Ancestral (low confidence)                   | AZOBR_140247 | Ancestral (medium confidence)                |
| AZOLI_2531 | Ancestral (medium confidence)                | AZOBR_140248 | Ancestral (high confidence)                  |
| AZOLI_2532 | Ancestral (medium confidence)                | AZOBR_140249 | Ancestral (high confidence)                  |
| AZOLI_2533 | Ancestral (medium confidence)                | AZOBR_140250 | Ancestral (high confidence)                  |
| AZOLI_2534 | Unassigned                                   | AZOBR_140251 | Ancestral (medium confidence)                |
| AZOLI_2535 | Unassigned                                   | AZOBR_140252 | Unassigned                                   |
| AZOLI_2536 | Ancestral (high confidence)                  | AZOBR_140253 | Ancestral (high confidence)                  |
| AZOLI_2537 | Ancestral (medium confidence)                | AZOBR_140254 | Ancestral (high confidence)                  |
| AZOLI_2538 | Ancestral (medium confidence)                | AZOBR_140255 | Ancestral (high confidence)                  |
| AZOLI_2539 | Horizontally Transferred (high confidence)   | AZOBR_140256 | Ancestral (high confidence)                  |
| AZOLI_2540 | Ancestral (low confidence)                   | AZOBR_140257 | Ancestral (high confidence)                  |
| AZOLI_2541 | Horizontally Transferred (high confidence)   | AZOBR_140258 | Horizontally Transferred (high confidence)   |
| AZOLI_2542 | Unassigned                                   | AZOBR_140259 | Unassigned                                   |
| AZOLI_2543 | Horizontally Transferred (medium confidence) | AZOBR_140260 | Horizontally Transferred (high confidence)   |
| AZOLI_2544 | Ancestral (low confidence)                   | AZOBR_140261 | Ancestral (medium confidence)                |

|            |                                              |              |                                              |
|------------|----------------------------------------------|--------------|----------------------------------------------|
| AZOLI_2545 | Horizontally Transferred (high confidence)   | AZOBR_140262 | Ancestral (low confidence)                   |
| AZOLI_2546 | Horizontally Transferred (high confidence)   | AZOBR_140263 | Unassigned                                   |
| AZOLI_2547 | Ancestral (low confidence)                   | AZOBR_140264 | Unassigned                                   |
| AZOLI_2548 | Unassigned                                   | AZOBR_140265 | Horizontally Transferred (low confidence)    |
| AZOLI_2549 | Horizontally Transferred (high confidence)   | AZOBR_140266 | Ancestral (low confidence)                   |
| AZOLI_2550 | Horizontally Transferred (high confidence)   | AZOBR_140267 | Horizontally Transferred (high confidence)   |
| AZOLI_2551 | Ancestral (low confidence)                   | AZOBR_140268 | Ancestral (high confidence)                  |
| AZOLI_2553 | Ancestral (low confidence)                   | AZOBR_140269 | Ancestral (medium confidence)                |
| AZOLI_2554 | Ancestral (medium confidence)                | AZOBR_140270 | Ancestral (low confidence)                   |
| AZOLI_2555 | Ancestral (low confidence)                   | AZOBR_140271 | Ancestral (medium confidence)                |
| AZOLI_2556 | Ancestral (medium confidence)                | AZOBR_140272 | Horizontally Transferred (high confidence)   |
| AZOLI_2557 | Ancestral (medium confidence)                | AZOBR_140273 | Ancestral (high confidence)                  |
| AZOLI_2558 | Ancestral (medium confidence)                | AZOBR_140274 | Ancestral (medium confidence)                |
| AZOLI_2560 | Ancestral (medium confidence)                | AZOBR_140275 | Ancestral (medium confidence)                |
| AZOLI_2561 | Horizontally Transferred (high confidence)   | AZOBR_140276 | Ancestral (low confidence)                   |
| AZOLI_2562 | Ancestral (low confidence)                   | AZOBR_140277 | Ancestral (medium confidence)                |
| AZOLI_2563 | Ancestral (low confidence)                   | AZOBR_140278 | Ancestral (medium confidence)                |
| AZOLI_2564 | Ancestral (medium confidence)                | AZOBR_140279 | Horizontally Transferred (high confidence)   |
| AZOLI_2565 | Horizontally Transferred (high confidence)   | AZOBR_140280 | Horizontally Transferred (high confidence)   |
| AZOLI_2566 | Horizontally Transferred (high confidence)   | AZOBR_140281 | Horizontally Transferred (high confidence)   |
| AZOLI_2567 | Ancestral (medium confidence)                | AZOBR_140282 | Ancestral (low confidence)                   |
| AZOLI_2569 | Ancestral (low confidence)                   | AZOBR_140283 | Unassigned                                   |
| AZOLI_2570 | Ancestral (medium confidence)                | AZOBR_140284 | Ancestral (medium confidence)                |
| AZOLI_2571 | Horizontally Transferred (medium confidence) | AZOBR_140285 | Ancestral (medium confidence)                |
| AZOLI_2572 | Ancestral (low confidence)                   | AZOBR_140286 | Horizontally Transferred (medium confidence) |
| AZOLI_2573 | Ancestral (low confidence)                   | AZOBR_140287 | Ancestral (low confidence)                   |
| AZOLI_2574 | Ancestral (medium confidence)                | AZOBR_140288 | Ancestral (low confidence)                   |
| AZOLI_2575 | Ancestral (medium confidence)                | AZOBR_140289 | Unassigned                                   |
| AZOLI_2577 | Unassigned                                   | AZOBR_140290 | Ancestral (high confidence)                  |
| AZOLI_2578 | Ancestral (medium confidence)                | AZOBR_140291 | Ancestral (high confidence)                  |
| AZOLI_2579 | Ancestral (high confidence)                  | AZOBR_140292 | Ancestral (medium confidence)                |
| AZOLI_2580 | Ancestral (medium confidence)                | AZOBR_140293 | Ancestral (medium confidence)                |
| AZOLI_2583 | Ancestral (medium confidence)                | AZOBR_140294 | Ancestral (medium confidence)                |
| AZOLI_2584 | Ancestral (medium confidence)                | AZOBR_140295 | Unassigned                                   |
| AZOLI_2585 | Ancestral (medium confidence)                | AZOBR_140296 | Unassigned                                   |
| AZOLI_2586 | Ancestral (medium confidence)                | AZOBR_140297 | Ancestral (low confidence)                   |
| AZOLI_2587 | Ancestral (medium confidence)                | AZOBR_140298 | Horizontally Transferred (high confidence)   |
| AZOLI_2588 | Ancestral (medium confidence)                | AZOBR_140299 | Unassigned                                   |
| AZOLI_2589 | Ancestral (medium confidence)                | AZOBR_140300 | Unassigned                                   |
| AZOLI_2590 | Ancestral (high confidence)                  | AZOBR_140301 | Unassigned                                   |
| AZOLI_2591 | Horizontally Transferred (low confidence)    | AZOBR_140302 | Ancestral (low confidence)                   |
| AZOLI_2592 | Ancestral (medium confidence)                | AZOBR_140303 | Ancestral (low confidence)                   |
| AZOLI_2594 | Ancestral (medium confidence)                | AZOBR_140304 | Unassigned                                   |
| AZOLI_2595 | Ancestral (high confidence)                  | AZOBR_140305 | Ancestral (high confidence)                  |
| AZOLI_2596 | Horizontally Transferred (high confidence)   | AZOBR_140306 | Ancestral (low confidence)                   |
| AZOLI_2597 | Unassigned                                   | AZOBR_140307 | Ancestral (medium confidence)                |
| AZOLI_2598 | Ancestral (medium confidence)                | AZOBR_140308 | Ancestral (high confidence)                  |
| AZOLI_2599 | Horizontally Transferred (high confidence)   | AZOBR_140309 | Ancestral (high confidence)                  |
| AZOLI_2600 | Ancestral (medium confidence)                | AZOBR_140310 | Horizontally Transferred (high confidence)   |
| AZOLI_2601 | Ancestral (high confidence)                  | AZOBR_140311 | Ancestral (medium confidence)                |
| AZOLI_2602 | Ancestral (high confidence)                  | AZOBR_140312 | Unassigned                                   |
| AZOLI_2603 | Ancestral (high confidence)                  | AZOBR_150001 | Unassigned                                   |
| AZOLI_2604 | Ancestral (high confidence)                  | AZOBR_150002 | Horizontally Transferred (high confidence)   |
| AZOLI_2605 | Ancestral (high confidence)                  | AZOBR_150003 | Ancestral (low confidence)                   |
| AZOLI_2607 | Ancestral (medium confidence)                | AZOBR_150004 | Ancestral (low confidence)                   |
| AZOLI_2608 | Ancestral (medium confidence)                | AZOBR_150005 | Horizontally Transferred (high confidence)   |
| AZOLI_2610 | Ancestral (high confidence)                  | AZOBR_150006 | Horizontally Transferred (high confidence)   |
| AZOLI_2611 | Ancestral (high confidence)                  | AZOBR_150007 | Horizontally Transferred (medium confidence) |
| AZOLI_2612 | Ancestral (high confidence)                  | AZOBR_150008 | Horizontally Transferred (high confidence)   |
| AZOLI_2613 | Ancestral (high confidence)                  | AZOBR_150009 | Horizontally Transferred (high confidence)   |
| AZOLI_2614 | Ancestral (low confidence)                   | AZOBR_150010 | Ancestral (medium confidence)                |
| AZOLI_2615 | Unassigned                                   | AZOBR_150011 | Ancestral (low confidence)                   |
| AZOLI_2616 | Horizontally Transferred (high confidence)   | AZOBR_150012 | Horizontally Transferred (medium confidence) |
| AZOLI_2618 | Unassigned                                   | AZOBR_150013 | Ancestral (medium confidence)                |
| AZOLI_2619 | Ancestral (medium confidence)                | AZOBR_150014 | Unassigned                                   |
| AZOLI_2620 | Horizontally Transferred (high confidence)   | AZOBR_150015 | Horizontally Transferred (high confidence)   |
| AZOLI_2621 | Horizontally Transferred (high confidence)   | AZOBR_150016 | Ancestral (medium confidence)                |
| AZOLI_2622 | Ancestral (medium confidence)                | AZOBR_150017 | Ancestral (high confidence)                  |
| AZOLI_2623 | Ancestral (high confidence)                  | AZOBR_150018 | Horizontally Transferred (high confidence)   |
| AZOLI_2624 | Horizontally Transferred (high confidence)   | AZOBR_150019 | Ancestral (medium confidence)                |
| AZOLI_2625 | Ancestral (low confidence)                   | AZOBR_150020 | Ancestral (low confidence)                   |
| AZOLI_2626 | Horizontally Transferred (high confidence)   | AZOBR_150021 | Ancestral (high confidence)                  |
| AZOLI_2627 | Ancestral (medium confidence)                | AZOBR_150022 | Ancestral (high confidence)                  |
| AZOLI_2628 | Ancestral (high confidence)                  | AZOBR_150023 | Ancestral (high confidence)                  |
| AZOLI_2629 | Ancestral (low confidence)                   | AZOBR_150024 | Unassigned                                   |



|            |                                              |              |                                            |
|------------|----------------------------------------------|--------------|--------------------------------------------|
| AZOLI_2630 | Ancestral (high confidence)                  | AZOBR_150025 | Ancestral (high confidence)                |
| AZOLI_2631 | Unassigned                                   | AZOBR_150026 | Ancestral (high confidence)                |
| AZOLI_2632 | Ancestral (high confidence)                  | AZOBR_150027 | Ancestral (medium confidence)              |
| AZOLI_2633 | Ancestral (high confidence)                  | AZOBR_150028 | Ancestral (high confidence)                |
| AZOLI_2634 | Unassigned                                   | AZOBR_150029 | Ancestral (low confidence)                 |
| AZOLI_2635 | Ancestral (low confidence)                   | AZOBR_150030 | Ancestral (medium confidence)              |
| AZOLI_2636 | Horizontally Transferred (high confidence)   | AZOBR_150031 | Ancestral (high confidence)                |
| AZOLI_2637 | Ancestral (high confidence)                  | AZOBR_150032 | Unassigned                                 |
| AZOLI_2638 | Horizontally Transferred (high confidence)   | AZOBR_150033 | Ancestral (low confidence)                 |
| AZOLI_2639 | Ancestral (medium confidence)                | AZOBR_150034 | Ancestral (high confidence)                |
| AZOLI_2640 | Horizontally Transferred (high confidence)   | AZOBR_150035 | Ancestral (high confidence)                |
| AZOLI_2641 | Ancestral (high confidence)                  | AZOBR_150036 | Unassigned                                 |
| AZOLI_2642 | Ancestral (low confidence)                   | AZOBR_150037 | Ancestral (medium confidence)              |
| AZOLI_2644 | Horizontally Transferred (high confidence)   | AZOBR_150038 | Ancestral (low confidence)                 |
| AZOLI_2645 | Unassigned                                   | AZOBR_150039 | Ancestral (high confidence)                |
| AZOLI_2646 | Ancestral (medium confidence)                | AZOBR_150040 | Ancestral (medium confidence)              |
| AZOLI_2647 | Horizontally Transferred (high confidence)   | AZOBR_150041 | Horizontally Transferred (high confidence) |
| AZOLI_2648 | Ancestral (medium confidence)                | AZOBR_150042 | Ancestral (medium confidence)              |
| AZOLI_2649 | Ancestral (medium confidence)                | AZOBR_150043 | Ancestral (high confidence)                |
| AZOLI_2650 | Ancestral (high confidence)                  | AZOBR_150044 | Ancestral (high confidence)                |
| AZOLI_2651 | Ancestral (high confidence)                  | AZOBR_150045 | Unassigned                                 |
| AZOLI_2652 | Ancestral (high confidence)                  | AZOBR_150046 | Ancestral (medium confidence)              |
| AZOLI_2653 | Horizontally Transferred (high confidence)   | AZOBR_150047 | Ancestral (high confidence)                |
| AZOLI_2654 | Ancestral (low confidence)                   | AZOBR_150048 | Ancestral (high confidence)                |
| AZOLI_2655 | Horizontally Transferred (high confidence)   | AZOBR_150049 | Horizontally Transferred (high confidence) |
| AZOLI_2656 | Unassigned                                   | AZOBR_150050 | Unassigned                                 |
| AZOLI_2657 | Ancestral (low confidence)                   | AZOBR_150051 | Unassigned                                 |
| AZOLI_2658 | Horizontally Transferred (high confidence)   | AZOBR_150052 | Ancestral (low confidence)                 |
| AZOLI_2659 | Ancestral (high confidence)                  | AZOBR_150053 | Ancestral (medium confidence)              |
| AZOLI_2660 | Ancestral (high confidence)                  | AZOBR_150054 | Ancestral (medium confidence)              |
| AZOLI_2661 | Horizontally Transferred (high confidence)   | AZOBR_150055 | Ancestral (low confidence)                 |
| AZOLI_2663 | Ancestral (medium confidence)                | AZOBR_150056 | Ancestral (high confidence)                |
| AZOLI_2664 | Ancestral (high confidence)                  | AZOBR_150057 | Unassigned                                 |
| AZOLI_2665 | Ancestral (low confidence)                   | AZOBR_150058 | Ancestral (medium confidence)              |
| AZOLI_2666 | Ancestral (low confidence)                   | AZOBR_150059 | Ancestral (high confidence)                |
| AZOLI_2667 | Ancestral (low confidence)                   | AZOBR_150060 | Ancestral (medium confidence)              |
| AZOLI_2668 | Ancestral (medium confidence)                | AZOBR_150061 | Ancestral (medium confidence)              |
| AZOLI_2669 | Ancestral (low confidence)                   | AZOBR_150062 | Ancestral (high confidence)                |
| AZOLI_2670 | Ancestral (low confidence)                   | AZOBR_150063 | Ancestral (high confidence)                |
| AZOLI_2671 | Ancestral (low confidence)                   | AZOBR_150064 | Horizontally Transferred (high confidence) |
| AZOLI_2672 | Ancestral (medium confidence)                | AZOBR_150065 | Ancestral (medium confidence)              |
| AZOLI_2673 | Horizontally Transferred (medium confidence) | AZOBR_150066 | Unassigned                                 |
| AZOLI_2674 | Horizontally Transferred (high confidence)   | AZOBR_150067 | Ancestral (medium confidence)              |
| AZOLI_2675 | Ancestral (high confidence)                  | AZOBR_150068 | Unassigned                                 |
| AZOLI_2676 | Ancestral (medium confidence)                | AZOBR_150069 | Ancestral (low confidence)                 |
| AZOLI_2677 | Ancestral (low confidence)                   | AZOBR_150070 | Unassigned                                 |
| AZOLI_2678 | Ancestral (low confidence)                   | AZOBR_150071 | Ancestral (low confidence)                 |
| AZOLI_2679 | Horizontally Transferred (medium confidence) | AZOBR_150072 | Ancestral (medium confidence)              |
| AZOLI_2680 | Horizontally Transferred (high confidence)   | AZOBR_150073 | Ancestral (medium confidence)              |
| AZOLI_2681 | Ancestral (low confidence)                   | AZOBR_150074 | Ancestral (high confidence)                |
| AZOLI_2682 | Horizontally Transferred (high confidence)   | AZOBR_150075 | Ancestral (medium confidence)              |
| AZOLI_2683 | Horizontally Transferred (low confidence)    | AZOBR_150076 | Ancestral (high confidence)                |
| AZOLI_2684 | Unassigned                                   | AZOBR_150077 | Ancestral (high confidence)                |
| AZOLI_2685 | Ancestral (high confidence)                  | AZOBR_150078 | Unassigned                                 |
| AZOLI_2686 | Ancestral (low confidence)                   | AZOBR_150079 | Ancestral (high confidence)                |
| AZOLI_2688 | Ancestral (medium confidence)                | AZOBR_150080 | Ancestral (high confidence)                |
| AZOLI_2689 | Unassigned                                   | AZOBR_150081 | Ancestral (high confidence)                |
| AZOLI_2690 | Ancestral (medium confidence)                | AZOBR_150082 | Unassigned                                 |
| AZOLI_2691 | Ancestral (medium confidence)                | AZOBR_150083 | Ancestral (low confidence)                 |
| AZOLI_2692 | Ancestral (high confidence)                  | AZOBR_150084 | Ancestral (high confidence)                |
| AZOLI_2693 | Ancestral (medium confidence)                | AZOBR_150085 | Horizontally Transferred (high confidence) |
| AZOLI_2694 | Ancestral (high confidence)                  | AZOBR_150086 | Ancestral (low confidence)                 |
| AZOLI_2695 | Ancestral (high confidence)                  | AZOBR_150087 | Ancestral (medium confidence)              |
| AZOLI_2697 | Ancestral (medium confidence)                | AZOBR_150088 | Ancestral (high confidence)                |
| AZOLI_2698 | Horizontally Transferred (high confidence)   | AZOBR_150089 | Ancestral (medium confidence)              |
| AZOLI_2699 | Ancestral (medium confidence)                | AZOBR_150090 | Ancestral (medium confidence)              |
| AZOLI_2700 | Ancestral (high confidence)                  | AZOBR_150091 | Horizontally Transferred (high confidence) |
| AZOLI_2702 | Ancestral (high confidence)                  | AZOBR_150092 | Ancestral (medium confidence)              |
| AZOLI_2703 | Ancestral (high confidence)                  | AZOBR_150093 | Ancestral (medium confidence)              |
| AZOLI_2705 | Ancestral (medium confidence)                | AZOBR_150094 | Ancestral (high confidence)                |
| AZOLI_2706 | Ancestral (high confidence)                  | AZOBR_150095 | Unassigned                                 |
| AZOLI_2707 | Ancestral (medium confidence)                | AZOBR_150096 | Ancestral (low confidence)                 |
| AZOLI_2708 | Ancestral (low confidence)                   | AZOBR_150097 | Ancestral (medium confidence)              |
| AZOLI_2709 | Ancestral (low confidence)                   | AZOBR_150098 | Unassigned                                 |
| AZOLI_2710 | Ancestral (high confidence)                  | AZOBR_150099 | Horizontally Transferred (low confidence)  |

|            |                                              |              |                                              |
|------------|----------------------------------------------|--------------|----------------------------------------------|
| AZOLI_2711 | Ancestral (medium confidence)                | AZOBR_150100 | Horizontally Transferred (low confidence)    |
| AZOLI_2712 | Ancestral (low confidence)                   | AZOBR_150101 | Horizontally Transferred (high confidence)   |
| AZOLI_2713 | Unassigned                                   | AZOBR_150102 | Ancestral (low confidence)                   |
| AZOLI_2714 | Ancestral (low confidence)                   | AZOBR_150103 | Unassigned                                   |
| AZOLI_2715 | Ancestral (medium confidence)                | AZOBR_150104 | Ancestral (medium confidence)                |
| AZOLI_2716 | Ancestral (high confidence)                  | AZOBR_150105 | Ancestral (high confidence)                  |
| AZOLI_2717 | Ancestral (medium confidence)                | AZOBR_150106 | Unassigned                                   |
| AZOLI_2718 | Ancestral (high confidence)                  | AZOBR_150107 | Ancestral (medium confidence)                |
| AZOLI_2719 | Ancestral (high confidence)                  | AZOBR_150108 | Ancestral (high confidence)                  |
| AZOLI_2720 | Ancestral (high confidence)                  | AZOBR_150109 | Ancestral (low confidence)                   |
| AZOLI_2721 | Ancestral (low confidence)                   | AZOBR_150110 | Ancestral (medium confidence)                |
| AZOLI_2722 | Horizontally Transferred (high confidence)   | AZOBR_150111 | Unassigned                                   |
| AZOLI_2723 | Ancestral (low confidence)                   | AZOBR_150112 | Ancestral (low confidence)                   |
| AZOLI_2724 | Ancestral (medium confidence)                | AZOBR_150113 | Ancestral (medium confidence)                |
| AZOLI_2725 | Unassigned                                   | AZOBR_150114 | Ancestral (low confidence)                   |
| AZOLI_2726 | Ancestral (low confidence)                   | AZOBR_150115 | Unassigned                                   |
| AZOLI_2727 | Unassigned                                   | AZOBR_150116 | Unassigned                                   |
| AZOLI_2728 | Horizontally Transferred (high confidence)   | AZOBR_150117 | Unassigned                                   |
| AZOLI_2729 | Horizontally Transferred (high confidence)   | AZOBR_150118 | Horizontally Transferred (high confidence)   |
| AZOLI_2730 | Horizontally Transferred (high confidence)   | AZOBR_150119 | Unassigned                                   |
| AZOLI_2731 | Horizontally Transferred (high confidence)   | AZOBR_150120 | Ancestral (low confidence)                   |
| AZOLI_2732 | Ancestral (high confidence)                  | AZOBR_150121 | Ancestral (low confidence)                   |
| AZOLI_2733 | Ancestral (low confidence)                   | AZOBR_150122 | Unassigned                                   |
| AZOLI_2734 | Ancestral (low confidence)                   | AZOBR_150123 | Horizontally Transferred (high confidence)   |
| AZOLI_2735 | Horizontally Transferred (high confidence)   | AZOBR_150124 | Horizontally Transferred (high confidence)   |
| AZOLI_2736 | Horizontally Transferred (high confidence)   | AZOBR_150125 | Horizontally Transferred (high confidence)   |
| AZOLI_2737 | Ancestral (medium confidence)                | AZOBR_150126 | Horizontally Transferred (high confidence)   |
| AZOLI_2738 | Horizontally Transferred (high confidence)   | AZOBR_150127 | Horizontally Transferred (high confidence)   |
| AZOLI_2739 | Ancestral (low confidence)                   | AZOBR_150128 | Ancestral (high confidence)                  |
| AZOLI_2740 | Ancestral (low confidence)                   | AZOBR_150129 | Ancestral (high confidence)                  |
| AZOLI_2741 | Unassigned                                   | AZOBR_150130 | Ancestral (high confidence)                  |
| AZOLI_2742 | Ancestral (high confidence)                  | AZOBR_150131 | Unassigned                                   |
| AZOLI_2743 | Ancestral (medium confidence)                | AZOBR_150132 | Ancestral (high confidence)                  |
| AZOLI_2744 | Ancestral (low confidence)                   | AZOBR_150133 | Horizontally Transferred (high confidence)   |
| AZOLI_2745 | Ancestral (medium confidence)                | AZOBR_150134 | Ancestral (low confidence)                   |
| AZOLI_2746 | Ancestral (medium confidence)                | AZOBR_150135 | Ancestral (medium confidence)                |
| AZOLI_2747 | Ancestral (high confidence)                  | AZOBR_150136 | Unassigned                                   |
| AZOLI_2748 | Ancestral (medium confidence)                | AZOBR_150137 | Horizontally Transferred (medium confidence) |
| AZOLI_2749 | Horizontally Transferred (high confidence)   | AZOBR_150138 | Unassigned                                   |
| AZOLI_2751 | Ancestral (high confidence)                  | AZOBR_150139 | Ancestral (medium confidence)                |
| AZOLI_2752 | Unassigned                                   | AZOBR_150140 | Ancestral (low confidence)                   |
| AZOLI_2753 | Ancestral (low confidence)                   | AZOBR_150141 | Ancestral (medium confidence)                |
| AZOLI_2754 | Ancestral (low confidence)                   | AZOBR_150142 | Unassigned                                   |
| AZOLI_2755 | Horizontally Transferred (high confidence)   | AZOBR_150143 | Ancestral (medium confidence)                |
| AZOLI_2756 | Ancestral (high confidence)                  | AZOBR_150144 | Ancestral (high confidence)                  |
| AZOLI_2757 | Ancestral (high confidence)                  | AZOBR_150145 | Ancestral (high confidence)                  |
| AZOLI_2758 | Ancestral (high confidence)                  | AZOBR_150146 | Ancestral (medium confidence)                |
| AZOLI_2759 | Horizontally Transferred (low confidence)    | AZOBR_150147 | Ancestral (high confidence)                  |
| AZOLI_2760 | Horizontally Transferred (low confidence)    | AZOBR_150148 | Unassigned                                   |
| AZOLI_2761 | Ancestral (high confidence)                  | AZOBR_150149 | Ancestral (medium confidence)                |
| AZOLI_2762 | Ancestral (low confidence)                   | AZOBR_150150 | Ancestral (high confidence)                  |
| AZOLI_2763 | Horizontally Transferred (medium confidence) | AZOBR_150151 | Horizontally Transferred (high confidence)   |
| AZOLI_2764 | Unassigned                                   | AZOBR_150152 | Horizontally Transferred (high confidence)   |
| AZOLI_2765 | Horizontally Transferred (low confidence)    | AZOBR_150153 | Ancestral (medium confidence)                |
| AZOLI_2766 | Horizontally Transferred (low confidence)    | AZOBR_150154 | Ancestral (medium confidence)                |
| AZOLI_2767 | Horizontally Transferred (high confidence)   | AZOBR_150155 | Unassigned                                   |
| AZOLI_2768 | Ancestral (medium confidence)                | AZOBR_150156 | Ancestral (low confidence)                   |
| AZOLI_2769 | Unassigned                                   | AZOBR_150157 | Horizontally Transferred (high confidence)   |
| AZOLI_2770 | Ancestral (low confidence)                   | AZOBR_150158 | Horizontally Transferred (low confidence)    |
| AZOLI_2771 | Ancestral (low confidence)                   | AZOBR_150159 | Unassigned                                   |
| AZOLI_2772 | Ancestral (low confidence)                   | AZOBR_150160 | Ancestral (medium confidence)                |
| AZOLI_2773 | Ancestral (high confidence)                  | AZOBR_150161 | Unassigned                                   |
| AZOLI_2774 | Ancestral (high confidence)                  | AZOBR_150162 | Unassigned                                   |
| AZOLI_2775 | Ancestral (medium confidence)                | AZOBR_150163 | Ancestral (medium confidence)                |
| AZOLI_2776 | Ancestral (high confidence)                  | AZOBR_150164 | Horizontally Transferred (high confidence)   |
| AZOLI_2777 | Ancestral (low confidence)                   | AZOBR_150165 | Ancestral (medium confidence)                |
| AZOLI_2778 | Ancestral (medium confidence)                | AZOBR_150166 | Ancestral (low confidence)                   |
| AZOLI_2779 | Unassigned                                   | AZOBR_150167 | Horizontally Transferred (high confidence)   |
| AZOLI_2781 | Horizontally Transferred (high confidence)   | AZOBR_150168 | Ancestral (low confidence)                   |
| AZOLI_2782 | Horizontally Transferred (high confidence)   | AZOBR_150169 | Ancestral (high confidence)                  |
| AZOLI_2783 | Ancestral (high confidence)                  | AZOBR_150170 | Ancestral (low confidence)                   |
| AZOLI_2784 | Ancestral (medium confidence)                | AZOBR_150171 | Ancestral (high confidence)                  |
| AZOLI_2785 | Ancestral (low confidence)                   | AZOBR_150172 | Unassigned                                   |
| AZOLI_2786 | Ancestral (high confidence)                  | AZOBR_150173 | Ancestral (high confidence)                  |
| AZOLI_2787 | Ancestral (medium confidence)                | AZOBR_150174 | Unassigned                                   |

|            |                                              |              |                                              |
|------------|----------------------------------------------|--------------|----------------------------------------------|
| AZOLI_2788 | Ancestral (high confidence)                  | AZOBR_150175 | Ancestral (low confidence)                   |
| AZOLI_2789 | Unassigned                                   | AZOBR_150176 | Ancestral (high confidence)                  |
| AZOLI_2790 | Horizontally Transferred (medium confidence) | AZOBR_150177 | Ancestral (medium confidence)                |
| AZOLI_2791 | Ancestral (low confidence)                   | AZOBR_150178 | Ancestral (high confidence)                  |
| AZOLI_2792 | Horizontally Transferred (low confidence)    | AZOBR_150179 | Ancestral (high confidence)                  |
| AZOLI_2793 | Unassigned                                   | AZOBR_150180 | Ancestral (high confidence)                  |
| AZOLI_2794 | Ancestral (medium confidence)                | AZOBR_150181 | Ancestral (high confidence)                  |
| AZOLI_2795 | Ancestral (low confidence)                   | AZOBR_150182 | Ancestral (medium confidence)                |
| AZOLI_2796 | Ancestral (medium confidence)                | AZOBR_150183 | Ancestral (high confidence)                  |
| AZOLI_2797 | Horizontally Transferred (high confidence)   | AZOBR_150184 | Unassigned                                   |
| AZOLI_2798 | Unassigned                                   | AZOBR_150185 | Ancestral (high confidence)                  |
| AZOLI_2799 | Ancestral (medium confidence)                | AZOBR_150186 | Unassigned                                   |
| AZOLI_2800 | Unassigned                                   | AZOBR_150187 | Ancestral (high confidence)                  |
| AZOLI_2801 | Ancestral (medium confidence)                | AZOBR_150188 | Ancestral (high confidence)                  |
| AZOLI_2802 | Ancestral (medium confidence)                | AZOBR_150189 | Ancestral (medium confidence)                |
| AZOLI_2803 | Ancestral (high confidence)                  | AZOBR_150190 | Unassigned                                   |
| AZOLI_2804 | Ancestral (medium confidence)                | AZOBR_150191 | Ancestral (high confidence)                  |
| AZOLI_2805 | Ancestral (medium confidence)                | AZOBR_150192 | Ancestral (medium confidence)                |
| AZOLI_2806 | Unassigned                                   | AZOBR_150193 | Ancestral (medium confidence)                |
| AZOLI_2807 | Ancestral (high confidence)                  | AZOBR_150194 | Ancestral (high confidence)                  |
| AZOLI_2808 | Horizontally Transferred (high confidence)   | AZOBR_150195 | Ancestral (low confidence)                   |
| AZOLI_2809 | Ancestral (medium confidence)                | AZOBR_150196 | Ancestral (high confidence)                  |
| AZOLI_2810 | Horizontally Transferred (high confidence)   | AZOBR_150197 | Ancestral (high confidence)                  |
| AZOLI_2811 | Ancestral (medium confidence)                | AZOBR_150198 | Ancestral (high confidence)                  |
| AZOLI_2812 | Ancestral (low confidence)                   | AZOBR_150199 | Ancestral (high confidence)                  |
| AZOLI_2813 | Ancestral (low confidence)                   | AZOBR_150200 | Unassigned                                   |
| AZOLI_2814 | Ancestral (high confidence)                  | AZOBR_150201 | Ancestral (high confidence)                  |
| AZOLI_2817 | Ancestral (medium confidence)                | AZOBR_150202 | Ancestral (high confidence)                  |
| AZOLI_2818 | Horizontally Transferred (high confidence)   | AZOBR_150203 | Ancestral (high confidence)                  |
| AZOLI_2819 | Ancestral (high confidence)                  | AZOBR_150204 | Ancestral (medium confidence)                |
| AZOLI_2820 | Ancestral (medium confidence)                | AZOBR_150205 | Horizontally Transferred (high confidence)   |
| AZOLI_2821 | Horizontally Transferred (high confidence)   | AZOBR_150206 | Ancestral (low confidence)                   |
| AZOLI_2822 | Horizontally Transferred (high confidence)   | AZOBR_150207 | Ancestral (high confidence)                  |
| AZOLI_2823 | Horizontally Transferred (high confidence)   | AZOBR_150208 | Ancestral (high confidence)                  |
| AZOLI_2824 | Ancestral (medium confidence)                | AZOBR_150209 | Ancestral (high confidence)                  |
| AZOLI_2825 | Ancestral (low confidence)                   | AZOBR_150210 | Ancestral (high confidence)                  |
| AZOLI_2826 | Ancestral (low confidence)                   | AZOBR_150211 | Ancestral (medium confidence)                |
| AZOLI_2827 | Ancestral (medium confidence)                | AZOBR_150212 | Ancestral (high confidence)                  |
| AZOLI_2828 | Unassigned                                   | AZOBR_150213 | Ancestral (high confidence)                  |
| AZOLI_2829 | Ancestral (high confidence)                  | AZOBR_150214 | Ancestral (low confidence)                   |
| AZOLI_2830 | Unassigned                                   | AZOBR_150215 | Unassigned                                   |
| AZOLI_2831 | Ancestral (low confidence)                   | AZOBR_150216 | Unassigned                                   |
| AZOLI_2832 | Ancestral (high confidence)                  | AZOBR_150217 | Ancestral (medium confidence)                |
| AZOLI_2833 | Ancestral (high confidence)                  | AZOBR_150218 | Ancestral (low confidence)                   |
| AZOLI_2834 | Horizontally Transferred (low confidence)    | AZOBR_150219 | Ancestral (low confidence)                   |
| AZOLI_2835 | Ancestral (high confidence)                  | AZOBR_150220 | Unassigned                                   |
| AZOLI_2836 | Ancestral (medium confidence)                | AZOBR_150221 | Ancestral (low confidence)                   |
| AZOLI_2837 | Ancestral (high confidence)                  | AZOBR_150222 | Ancestral (low confidence)                   |
| AZOLI_2838 | Horizontally Transferred (high confidence)   | AZOBR_150223 | Unassigned                                   |
| AZOLI_2839 | Ancestral (low confidence)                   | AZOBR_150224 | Ancestral (high confidence)                  |
| AZOLI_2840 | Unassigned                                   | AZOBR_150225 | Ancestral (high confidence)                  |
| AZOLI_2841 | Ancestral (medium confidence)                | AZOBR_150226 | Ancestral (medium confidence)                |
| AZOLI_2842 | Ancestral (high confidence)                  | AZOBR_150227 | Ancestral (medium confidence)                |
| AZOLI_2843 | Ancestral (high confidence)                  | AZOBR_150228 | Horizontally Transferred (medium confidence) |
| AZOLI_2844 | Ancestral (low confidence)                   | AZOBR_150229 | Ancestral (low confidence)                   |
| AZOLI_2845 | Ancestral (medium confidence)                | AZOBR_150230 | Ancestral (low confidence)                   |
| AZOLI_2846 | Ancestral (low confidence)                   | AZOBR_150231 | Ancestral (high confidence)                  |
| AZOLI_2847 | Horizontally Transferred (high confidence)   | AZOBR_150232 | Ancestral (low confidence)                   |
| AZOLI_2848 | Ancestral (low confidence)                   | AZOBR_150233 | Ancestral (medium confidence)                |
| AZOLI_2849 | Ancestral (high confidence)                  | AZOBR_150234 | Ancestral (medium confidence)                |
| AZOLI_2850 | Ancestral (high confidence)                  | AZOBR_150235 | Ancestral (high confidence)                  |
| AZOLI_2852 | Horizontally Transferred (high confidence)   | AZOBR_150236 | Horizontally Transferred (high confidence)   |
| AZOLI_2853 | Ancestral (medium confidence)                | AZOBR_150237 | Ancestral (high confidence)                  |
| AZOLI_2854 | Ancestral (medium confidence)                | AZOBR_150238 | Ancestral (medium confidence)                |
| AZOLI_2855 | Ancestral (high confidence)                  | AZOBR_150239 | Ancestral (high confidence)                  |
| AZOLI_2856 | Horizontally Transferred (high confidence)   | AZOBR_150240 | Ancestral (high confidence)                  |
| AZOLI_2857 | Ancestral (high confidence)                  | AZOBR_150241 | Ancestral (high confidence)                  |
| AZOLI_2858 | Ancestral (high confidence)                  | AZOBR_150242 | Ancestral (high confidence)                  |
| AZOLI_2859 | Ancestral (high confidence)                  | AZOBR_150243 | Ancestral (medium confidence)                |
| AZOLI_2860 | Ancestral (high confidence)                  | AZOBR_150244 | Ancestral (high confidence)                  |
| AZOLI_2861 | Ancestral (high confidence)                  | AZOBR_150245 | Ancestral (high confidence)                  |
| AZOLI_2862 | Ancestral (high confidence)                  | AZOBR_150246 | Ancestral (high confidence)                  |
| AZOLI_2863 | Ancestral (high confidence)                  | AZOBR_150247 | Ancestral (medium confidence)                |
| AZOLI_2864 | Ancestral (low confidence)                   | AZOBR_150248 | Ancestral (high confidence)                  |
| AZOLI_2865 | Horizontally Transferred (high confidence)   | AZOBR_150249 | Ancestral (medium confidence)                |

|            |                                            |              |                                            |
|------------|--------------------------------------------|--------------|--------------------------------------------|
| AZOLI_2866 | Horizontally Transferred (high confidence) | AZOBR_150250 | Ancestral (high confidence)                |
| AZOLI_2868 | Unassigned                                 | AZOBR_150251 | Ancestral (medium confidence)              |
| AZOLI_2869 | Ancestral (low confidence)                 | AZOBR_150252 | Ancestral (high confidence)                |
| AZOLI_2870 | Ancestral (high confidence)                | AZOBR_150253 | Ancestral (high confidence)                |
| AZOLI_2871 | Ancestral (medium confidence)              | AZOBR_150254 | Ancestral (high confidence)                |
| AZOLI_2872 | Ancestral (high confidence)                | AZOBR_150255 | Ancestral (high confidence)                |
| AZOLI_2873 | Ancestral (high confidence)                | AZOBR_150256 | Ancestral (high confidence)                |
| AZOLI_2874 | Ancestral (high confidence)                | AZOBR_150257 | Ancestral (high confidence)                |
| AZOLI_2875 | Ancestral (high confidence)                | AZOBR_150258 | Unassigned                                 |
| AZOLI_2876 | Ancestral (medium confidence)              | AZOBR_160001 | Ancestral (medium confidence)              |
| AZOLI_2877 | Ancestral (medium confidence)              | AZOBR_160002 | Ancestral (high confidence)                |
| AZOLI_2879 | Unassigned                                 | AZOBR_160003 | Ancestral (high confidence)                |
| AZOLI_2881 | Ancestral (medium confidence)              | AZOBR_160004 | Ancestral (high confidence)                |
| AZOLI_2882 | Ancestral (low confidence)                 | AZOBR_160005 | Ancestral (low confidence)                 |
| AZOLI_2883 | Ancestral (low confidence)                 | AZOBR_160006 | Ancestral (medium confidence)              |
| AZOLI_2884 | Unassigned                                 | AZOBR_160007 | Ancestral (high confidence)                |
| AZOLI_2886 | Ancestral (medium confidence)              | AZOBR_160008 | Unassigned                                 |
| AZOLI_2887 | Unassigned                                 | AZOBR_160009 | Ancestral (medium confidence)              |
| AZOLI_2889 | Ancestral (medium confidence)              | AZOBR_160010 | Ancestral (medium confidence)              |
| AZOLI_2890 | Ancestral (high confidence)                | AZOBR_160011 | Ancestral (medium confidence)              |
| AZOLI_2891 | Horizontally Transferred (high confidence) | AZOBR_160012 | Ancestral (medium confidence)              |
| AZOLI_2893 | Ancestral (high confidence)                | AZOBR_160013 | Ancestral (high confidence)                |
| AZOLI_2894 | Ancestral (high confidence)                | AZOBR_160014 | Ancestral (medium confidence)              |
| AZOLI_2896 | Ancestral (high confidence)                | AZOBR_160015 | Ancestral (medium confidence)              |
| AZOLI_2897 | Unassigned                                 | AZOBR_160016 | Unassigned                                 |
| AZOLI_2898 | Ancestral (medium confidence)              | AZOBR_160017 | Ancestral (high confidence)                |
| AZOLI_2899 | Ancestral (high confidence)                | AZOBR_160018 | Unassigned                                 |
| AZOLI_2900 | Ancestral (medium confidence)              | AZOBR_160019 | Unassigned                                 |
| AZOLI_2901 | Ancestral (high confidence)                | AZOBR_160020 | Ancestral (medium confidence)              |
| AZOLI_2902 | Unassigned                                 | AZOBR_160021 | Ancestral (low confidence)                 |
| AZOLI_2903 | Ancestral (high confidence)                | AZOBR_160022 | Unassigned                                 |
| AZOLI_2904 | Ancestral (medium confidence)              | AZOBR_160023 | Unassigned                                 |
| AZOLI_2905 | Ancestral (medium confidence)              | AZOBR_160024 | Unassigned                                 |
| AZOLI_2906 | Horizontally Transferred (high confidence) | AZOBR_160025 | Unassigned                                 |
| AZOLI_2907 | Horizontally Transferred (high confidence) | AZOBR_160026 | Ancestral (medium confidence)              |
| AZOLI_2908 | Ancestral (low confidence)                 | AZOBR_160027 | Unassigned                                 |
| AZOLI_2909 | Ancestral (medium confidence)              | AZOBR_160028 | Unassigned                                 |
| AZOLI_2910 | Horizontally Transferred (low confidence)  | AZOBR_160029 | Horizontally Transferred (high confidence) |
| AZOLI_2911 | Ancestral (low confidence)                 | AZOBR_160030 | Unassigned                                 |
| AZOLI_2913 | Horizontally Transferred (high confidence) | AZOBR_160031 | Ancestral (medium confidence)              |
| AZOLI_2915 | Unassigned                                 | AZOBR_160032 | Horizontally Transferred (high confidence) |
| AZOLI_2916 | Horizontally Transferred (high confidence) | AZOBR_160033 | Ancestral (medium confidence)              |
| AZOLI_2917 | Horizontally Transferred (high confidence) | AZOBR_160034 | Unassigned                                 |
| AZOLI_2918 | Horizontally Transferred (high confidence) | AZOBR_160035 | Unassigned                                 |
| AZOLI_2919 | Ancestral (medium confidence)              | AZOBR_160036 | Ancestral (medium confidence)              |
| AZOLI_2920 | Horizontally Transferred (high confidence) | AZOBR_160037 | Unassigned                                 |
| AZOLI_2921 | Ancestral (high confidence)                | AZOBR_160038 | Ancestral (medium confidence)              |
| AZOLI_2922 | Ancestral (medium confidence)              | AZOBR_160039 | Ancestral (low confidence)                 |
| AZOLI_2923 | Unassigned                                 | AZOBR_160040 | Unassigned                                 |
| AZOLI_2924 | Unassigned                                 | AZOBR_160041 | Ancestral (low confidence)                 |
| AZOLI_2925 | Ancestral (medium confidence)              | AZOBR_160042 | Ancestral (low confidence)                 |
| AZOLI_2926 | Ancestral (high confidence)                | AZOBR_160043 | Ancestral (low confidence)                 |
| AZOLI_2927 | Ancestral (medium confidence)              | AZOBR_160044 | Horizontally Transferred (high confidence) |
| AZOLI_2928 | Ancestral (medium confidence)              | AZOBR_160045 | Ancestral (low confidence)                 |
| AZOLI_2929 | Ancestral (medium confidence)              | AZOBR_160046 | Ancestral (low confidence)                 |
| AZOLI_2930 | Ancestral (high confidence)                | AZOBR_160047 | Unassigned                                 |
| AZOLI_2931 | Ancestral (medium confidence)              | AZOBR_160048 | Horizontally Transferred (high confidence) |
| AZOLI_2932 | Horizontally Transferred (low confidence)  | AZOBR_160049 | Ancestral (low confidence)                 |
| AZOLI_2933 | Ancestral (medium confidence)              | AZOBR_160050 | Ancestral (low confidence)                 |
| AZOLI_2934 | Ancestral (medium confidence)              | AZOBR_160051 | Ancestral (high confidence)                |
| AZOLI_2935 | Unassigned                                 | AZOBR_160052 | Ancestral (low confidence)                 |
| AZOLI_2936 | Ancestral (medium confidence)              | AZOBR_160053 | Horizontally Transferred (high confidence) |
| AZOLI_2937 | Ancestral (high confidence)                | AZOBR_160054 | Unassigned                                 |
| AZOLI_2938 | Ancestral (high confidence)                | AZOBR_160055 | Ancestral (low confidence)                 |
| AZOLI_2939 | Horizontally Transferred (high confidence) | AZOBR_160056 | Ancestral (low confidence)                 |
| AZOLI_2940 | Ancestral (medium confidence)              | AZOBR_160057 | Ancestral (low confidence)                 |
| AZOLI_2941 | Ancestral (high confidence)                | AZOBR_160058 | Horizontally Transferred (high confidence) |
| AZOLI_2942 | Unassigned                                 | AZOBR_160059 | Horizontally Transferred (high confidence) |
| AZOLI_2943 | Ancestral (medium confidence)              | AZOBR_160060 | Horizontally Transferred (high confidence) |
| AZOLI_2944 | Ancestral (high confidence)                | AZOBR_160061 | Horizontally Transferred (high confidence) |
| AZOLI_2945 | Ancestral (low confidence)                 | AZOBR_160062 | Horizontally Transferred (high confidence) |
| AZOLI_2946 | Ancestral (high confidence)                | AZOBR_160063 | Horizontally Transferred (high confidence) |
| AZOLI_2947 | Ancestral (medium confidence)              | AZOBR_160064 | Horizontally Transferred (high confidence) |
| AZOLI_2948 | Ancestral (medium confidence)              | AZOBR_160065 | Horizontally Transferred (high confidence) |
| AZOLI_2949 | Ancestral (medium confidence)              | AZOBR_160066 | Horizontally Transferred (high confidence) |

|            |                                              |              |                                              |
|------------|----------------------------------------------|--------------|----------------------------------------------|
| AZOLI_2950 | Ancestral (high confidence)                  | AZOBR_160067 | Ancestral (low confidence)                   |
| AZOLI_2951 | Ancestral (high confidence)                  | AZOBR_160068 | Ancestral (low confidence)                   |
| AZOLI_2952 | Ancestral (low confidence)                   | AZOBR_160069 | Unassigned                                   |
| AZOLI_2953 | Ancestral (high confidence)                  | AZOBR_160070 | Ancestral (medium confidence)                |
| AZOLI_2954 | Ancestral (medium confidence)                | AZOBR_160071 | Horizontally Transferred (high confidence)   |
| AZOLI_2955 | Ancestral (medium confidence)                | AZOBR_160072 | Unassigned                                   |
| AZOLI_2956 | Ancestral (medium confidence)                | AZOBR_160073 | Ancestral (low confidence)                   |
| AZOLI_2957 | Ancestral (low confidence)                   | AZOBR_160074 | Horizontally Transferred (high confidence)   |
| AZOLI_2958 | Ancestral (high confidence)                  | AZOBR_160075 | Horizontally Transferred (high confidence)   |
| AZOLI_2959 | Ancestral (high confidence)                  | AZOBR_160076 | Ancestral (low confidence)                   |
| AZOLI_2960 | Ancestral (high confidence)                  | AZOBR_160077 | Ancestral (low confidence)                   |
| AZOLI_2961 | Ancestral (high confidence)                  | AZOBR_160078 | Ancestral (low confidence)                   |
| AZOLI_2962 | Ancestral (medium confidence)                | AZOBR_160079 | Horizontally Transferred (high confidence)   |
| AZOLI_2963 | Horizontally Transferred (high confidence)   | AZOBR_170001 | Ancestral (high confidence)                  |
| AZOLI_2965 | Ancestral (high confidence)                  | AZOBR_170002 | Horizontally Transferred (high confidence)   |
| AZOLI_2966 | Ancestral (high confidence)                  | AZOBR_170003 | Horizontally Transferred (high confidence)   |
| AZOLI_2968 | Ancestral (high confidence)                  | AZOBR_170004 | Ancestral (high confidence)                  |
| AZOLI_2969 | Ancestral (medium confidence)                | AZOBR_170005 | Ancestral (high confidence)                  |
| AZOLI_2970 | Horizontally Transferred (high confidence)   | AZOBR_170006 | Ancestral (medium confidence)                |
| AZOLI_2971 | Horizontally Transferred (high confidence)   | AZOBR_170007 | Ancestral (high confidence)                  |
| AZOLI_2972 | Horizontally Transferred (high confidence)   | AZOBR_170008 | Ancestral (low confidence)                   |
| AZOLI_2973 | Horizontally Transferred (high confidence)   | AZOBR_170009 | Ancestral (medium confidence)                |
| AZOLI_2974 | Ancestral (low confidence)                   | AZOBR_170010 | Ancestral (high confidence)                  |
| AZOLI_2975 | Unassigned                                   | AZOBR_170011 | Ancestral (high confidence)                  |
| AZOLI_2976 | Unassigned                                   | AZOBR_180001 | Unassigned                                   |
| AZOLI_2977 | Unassigned                                   | AZOBR_180002 | Ancestral (high confidence)                  |
| AZOLI_2979 | Ancestral (high confidence)                  | AZOBR_180003 | Ancestral (high confidence)                  |
| AZOLI_2980 | Ancestral (high confidence)                  | AZOBR_180004 | Ancestral (high confidence)                  |
| AZOLI_2981 | Unassigned                                   | AZOBR_180005 | Ancestral (high confidence)                  |
| AZOLI_2982 | Ancestral (high confidence)                  | AZOBR_180006 | Ancestral (medium confidence)                |
| AZOLI_2983 | Ancestral (high confidence)                  | AZOBR_180007 | Ancestral (medium confidence)                |
| AZOLI_2984 | Ancestral (medium confidence)                | AZOBR_180008 | Ancestral (low confidence)                   |
| AZOLI_2985 | Ancestral (medium confidence)                | AZOBR_180009 | Ancestral (high confidence)                  |
| AZOLI_2986 | Ancestral (high confidence)                  | AZOBR_180010 | Ancestral (low confidence)                   |
| AZOLI_2987 | Ancestral (high confidence)                  | AZOBR_180011 | Ancestral (low confidence)                   |
| AZOLI_2988 | Ancestral (medium confidence)                | AZOBR_180012 | Ancestral (high confidence)                  |
| AZOLI_2989 | Horizontally Transferred (high confidence)   | AZOBR_180013 | Horizontally Transferred (high confidence)   |
| AZOLI_2990 | Ancestral (high confidence)                  | AZOBR_180014 | Unassigned                                   |
| AZOLI_2991 | Ancestral (high confidence)                  | AZOBR_180015 | Horizontally Transferred (high confidence)   |
| AZOLI_2992 | Ancestral (medium confidence)                | AZOBR_180016 | Ancestral (high confidence)                  |
| AZOLI_2993 | Horizontally Transferred (medium confidence) | AZOBR_180017 | Ancestral (high confidence)                  |
| AZOLI_2994 | Horizontally Transferred (medium confidence) | AZOBR_180018 | Ancestral (high confidence)                  |
| AZOLI_2995 | Ancestral (medium confidence)                | AZOBR_180019 | Ancestral (high confidence)                  |
| AZOLI_2997 | Ancestral (medium confidence)                | AZOBR_180020 | Ancestral (high confidence)                  |
| AZOLI_2998 | Ancestral (high confidence)                  | AZOBR_180021 | Ancestral (high confidence)                  |
| AZOLI_2999 | Ancestral (high confidence)                  | AZOBR_180022 | Ancestral (high confidence)                  |
| AZOLI_3000 | Ancestral (medium confidence)                | AZOBR_180023 | Horizontally Transferred (high confidence)   |
| AZOLI_3001 | Ancestral (medium confidence)                | AZOBR_180024 | Ancestral (high confidence)                  |
| AZOLI_3002 | Ancestral (low confidence)                   | AZOBR_180025 | Ancestral (high confidence)                  |
| AZOLI_3003 | Ancestral (high confidence)                  | AZOBR_180026 | Unassigned                                   |
| AZOLI_3004 | Ancestral (high confidence)                  | AZOBR_180027 | Ancestral (high confidence)                  |
| AZOLI_3005 | Ancestral (medium confidence)                | AZOBR_180028 | Ancestral (medium confidence)                |
| AZOLI_3006 | Ancestral (medium confidence)                | AZOBR_180029 | Ancestral (low confidence)                   |
| AZOLI_3007 | Ancestral (high confidence)                  | AZOBR_180030 | Ancestral (high confidence)                  |
| AZOLI_3008 | Ancestral (high confidence)                  | AZOBR_180031 | Ancestral (medium confidence)                |
| AZOLI_3010 | Ancestral (high confidence)                  | AZOBR_180032 | Ancestral (medium confidence)                |
| AZOLI_3011 | Horizontally Transferred (high confidence)   | AZOBR_180033 | Horizontally Transferred (high confidence)   |
| AZOLI_3012 | Horizontally Transferred (high confidence)   | AZOBR_180034 | Unassigned                                   |
| AZOLI_3013 | Unassigned                                   | AZOBR_180035 | Horizontally Transferred (high confidence)   |
| AZOLI_3014 | Ancestral (high confidence)                  | AZOBR_180036 | Unassigned                                   |
| AZOLI_3015 | Ancestral (high confidence)                  | AZOBR_180037 | Ancestral (low confidence)                   |
| AZOLI_3016 | Ancestral (high confidence)                  | AZOBR_180038 | Unassigned                                   |
| AZOLI_3017 | Ancestral (medium confidence)                | AZOBR_180039 | Ancestral (high confidence)                  |
| AZOLI_3018 | Horizontally Transferred (high confidence)   | AZOBR_180040 | Horizontally Transferred (high confidence)   |
| AZOLI_3019 | Ancestral (high confidence)                  | AZOBR_180041 | Horizontally Transferred (high confidence)   |
| AZOLI_3020 | Ancestral (high confidence)                  | AZOBR_180042 | Unassigned                                   |
| AZOLI_3021 | Ancestral (high confidence)                  | AZOBR_180043 | Horizontally Transferred (high confidence)   |
| AZOLI_3022 | Ancestral (high confidence)                  | AZOBR_180044 | Horizontally Transferred (medium confidence) |
| AZOLI_3023 | Ancestral (medium confidence)                | AZOBR_180045 | Ancestral (high confidence)                  |
| AZOLI_3024 | Ancestral (medium confidence)                | AZOBR_180046 | Horizontally Transferred (medium confidence) |
| AZOLI_3025 | Ancestral (high confidence)                  | AZOBR_180047 | Horizontally Transferred (high confidence)   |
| AZOLI_3026 | Ancestral (medium confidence)                | AZOBR_180048 | Horizontally Transferred (high confidence)   |
| AZOLI_3027 | Ancestral (high confidence)                  | AZOBR_180049 | Unassigned                                   |
| AZOLI_3028 | Ancestral (medium confidence)                | AZOBR_180050 | Horizontally Transferred (high confidence)   |
| AZOLI_3029 | Ancestral (high confidence)                  | AZOBR_180051 | Unassigned                                   |



|              |                                              |              |                                              |
|--------------|----------------------------------------------|--------------|----------------------------------------------|
| AZOLI_3107   | Ancestral (medium confidence)                | AZOBR_180127 | Ancestral (medium confidence)                |
| AZOLI_3108   | Ancestral (high confidence)                  | AZOBR_180128 | Ancestral (low confidence)                   |
| AZOLI_3109   | Ancestral (low confidence)                   | AZOBR_180129 | Ancestral (high confidence)                  |
| AZOLI_3110   | Ancestral (high confidence)                  | AZOBR_180130 | Horizontally Transferred (high confidence)   |
| AZOLI_3111   | Ancestral (high confidence)                  | AZOBR_180131 | Horizontally Transferred (high confidence)   |
| AZOLI_3112   | Horizontally Transferred (high confidence)   | AZOBR_180132 | Unassigned                                   |
| AZOLI_3113   | Ancestral (medium confidence)                | AZOBR_180133 | Horizontally Transferred (high confidence)   |
| AZOLI_3114   | Horizontally Transferred (high confidence)   | AZOBR_180134 | Ancestral (low confidence)                   |
| AZOLI_3115   | Unassigned                                   | AZOBR_180135 | Ancestral (low confidence)                   |
| AZOLI_3117   | Unassigned                                   | AZOBR_180136 | Unassigned                                   |
| AZOLI_3118   | Ancestral (low confidence)                   | AZOBR_180137 | Ancestral (medium confidence)                |
| AZOLI_3119   | Ancestral (low confidence)                   | AZOBR_180138 | Unassigned                                   |
| AZOLI_3120   | Ancestral (high confidence)                  | AZOBR_180139 | Unassigned                                   |
| AZOLI_3121   | Ancestral (high confidence)                  | AZOBR_180140 | Horizontally Transferred (high confidence)   |
| AZOLI_3122   | Ancestral (high confidence)                  | AZOBR_180141 | Ancestral (high confidence)                  |
| AZOLI_3123   | Ancestral (medium confidence)                | AZOBR_180142 | Ancestral (medium confidence)                |
| AZOLI_3124   | Ancestral (medium confidence)                | AZOBR_180143 | Unassigned                                   |
| AZOLI_3125   | Ancestral (medium confidence)                | AZOBR_180144 | Unassigned                                   |
| AZOLI_3126   | Ancestral (medium confidence)                | AZOBR_180145 | Ancestral (high confidence)                  |
| AZOLI_3127   | Ancestral (medium confidence)                | AZOBR_180146 | Ancestral (low confidence)                   |
| AZOLI_3128   | Ancestral (medium confidence)                | AZOBR_180147 | Unassigned                                   |
| AZOLI_3129   | Ancestral (medium confidence)                | AZOBR_180148 | Ancestral (low confidence)                   |
| AZOLI_3130   | Unassigned                                   | AZOBR_180149 | Unassigned                                   |
| AZOLI_3131   | Horizontally Transferred (high confidence)   | AZOBR_180150 | Ancestral (low confidence)                   |
| AZOLI_3132   | Unassigned                                   | AZOBR_180151 | Ancestral (medium confidence)                |
| AZOLI_3133   | Ancestral (high confidence)                  | AZOBR_180152 | Horizontally Transferred (low confidence)    |
| AZOLI_3134   | Ancestral (medium confidence)                | AZOBR_180153 | Ancestral (low confidence)                   |
| AZOLI_3135   | Ancestral (high confidence)                  | AZOBR_180154 | Ancestral (low confidence)                   |
| AZOLI_3136   | Unassigned                                   | AZOBR_180155 | Ancestral (high confidence)                  |
| AZOLI_3137   | Ancestral (high confidence)                  | AZOBR_180156 | Unassigned                                   |
| AZOLI_3139   | Ancestral (high confidence)                  | AZOBR_180157 | Ancestral (high confidence)                  |
| AZOLI_3149   | Horizontally Transferred (high confidence)   | AZOBR_180158 | Ancestral (medium confidence)                |
| AZOLI_3150   | Horizontally Transferred (high confidence)   | AZOBR_180159 | Unassigned                                   |
| AZOLI_3151   | Ancestral (medium confidence)                | AZOBR_180160 | Ancestral (medium confidence)                |
| AZOLI_3152   | Unassigned                                   | AZOBR_180161 | Ancestral (medium confidence)                |
| AZOLI_3153   | Ancestral (high confidence)                  | AZOBR_180162 | Ancestral (low confidence)                   |
| AZOLI_3154   | Ancestral (high confidence)                  | AZOBR_180163 | Ancestral (medium confidence)                |
| AZOLI_3155   | Ancestral (high confidence)                  | AZOBR_180164 | Ancestral (low confidence)                   |
| AZOLI_3156   | Horizontally Transferred (high confidence)   | AZOBR_180165 | Ancestral (low confidence)                   |
| AZOLI_3157   | Ancestral (medium confidence)                | AZOBR_180166 | Ancestral (medium confidence)                |
| AZOLI_3158   | Ancestral (high confidence)                  | AZOBR_180167 | Unassigned                                   |
| AZOLI_3159   | Ancestral (high confidence)                  | AZOBR_180168 | Unassigned                                   |
| AZOLI_3160   | Ancestral (high confidence)                  | AZOBR_180169 | Horizontally Transferred (high confidence)   |
| AZOLI_3161   | Unassigned                                   | AZOBR_180170 | Ancestral (medium confidence)                |
| AZOLI_3162   | Unassigned                                   | AZOBR_180171 | Ancestral (medium confidence)                |
| AZOLI_3163   | Ancestral (high confidence)                  | AZOBR_180172 | Ancestral (medium confidence)                |
| AZOLI_3164   | Ancestral (medium confidence)                | AZOBR_180173 | Ancestral (medium confidence)                |
| AZOLI_3165   | Ancestral (high confidence)                  | AZOBR_180174 | Unassigned                                   |
| AZOLI_3166   | Ancestral (high confidence)                  | AZOBR_180175 | Horizontally Transferred (high confidence)   |
| AZOLI_3167   | Ancestral (medium confidence)                | AZOBR_180176 | Horizontally Transferred (low confidence)    |
| AZOLI_3168   | Ancestral (high confidence)                  | AZOBR_180177 | Horizontally Transferred (high confidence)   |
| AZOLI_3169   | Horizontally Transferred (high confidence)   | AZOBR_180178 | Ancestral (low confidence)                   |
| AZOLI_3170   | Horizontally Transferred (high confidence)   | AZOBR_180179 | Ancestral (medium confidence)                |
| AZOLI_3171   | Horizontally Transferred (high confidence)   | AZOBR_180180 | Horizontally Transferred (high confidence)   |
| AZOLI_3172   | Horizontally Transferred (high confidence)   | AZOBR_180181 | Horizontally Transferred (medium confidence) |
| AZOLI_3173   | Unassigned                                   | AZOBR_180182 | Ancestral (medium confidence)                |
| AZOLI_3174   | Ancestral (medium confidence)                | AZOBR_180183 | Ancestral (high confidence)                  |
| AZOLI_3175   | Ancestral (low confidence)                   | AZOBR_180184 | Ancestral (medium confidence)                |
| AZOLI_3176   | Ancestral (high confidence)                  | AZOBR_180185 | Unassigned                                   |
| AZOLI_3177   | Ancestral (high confidence)                  | AZOBR_180186 | Unassigned                                   |
| AZOLI_3178   | Ancestral (high confidence)                  | AZOBR_180187 | Unassigned                                   |
| AZOLI_p10003 | Unassigned                                   | AZOBR_180188 | Unassigned                                   |
| AZOLI_p10005 | Horizontally Transferred (high confidence)   | AZOBR_180189 | Unassigned                                   |
| AZOLI_p10010 | Horizontally Transferred (high confidence)   | AZOBR_180190 | Unassigned                                   |
| AZOLI_p10011 | Horizontally Transferred (high confidence)   | AZOBR_180191 | Ancestral (high confidence)                  |
| AZOLI_p10012 | Horizontally Transferred (high confidence)   | AZOBR_180192 | Ancestral (high confidence)                  |
| AZOLI_p10013 | Ancestral (medium confidence)                | AZOBR_180193 | Ancestral (medium confidence)                |
| AZOLI_p10015 | Horizontally Transferred (high confidence)   | AZOBR_180194 | Unassigned                                   |
| AZOLI_p10016 | Horizontally Transferred (low confidence)    | AZOBR_180195 | Ancestral (high confidence)                  |
| AZOLI_p10017 | Horizontally Transferred (medium confidence) | AZOBR_180196 | Horizontally Transferred (high confidence)   |
| AZOLI_p10018 | Ancestral (medium confidence)                | AZOBR_180197 | Ancestral (medium confidence)                |
| AZOLI_p10019 | Ancestral (medium confidence)                | AZOBR_180198 | Unassigned                                   |
| AZOLI_p10020 | Horizontally Transferred (high confidence)   | AZOBR_180199 | Ancestral (high confidence)                  |
| AZOLI_p10021 | Horizontally Transferred (medium confidence) | AZOBR_180200 | Ancestral (medium confidence)                |
| AZOLI_p10022 | Ancestral (low confidence)                   | AZOBR_180201 | Unassigned                                   |











|              |                                              |              |                                              |
|--------------|----------------------------------------------|--------------|----------------------------------------------|
| AZOLI_p10375 | Ancestral (medium confidence)                | AZOBR_200137 | Ancestral (high confidence)                  |
| AZOLI_p10376 | Unassigned                                   | AZOBR_200138 | Ancestral (medium confidence)                |
| AZOLI_p10379 | Horizontally Transferred (high confidence)   | AZOBR_200139 | Ancestral (high confidence)                  |
| AZOLI_p10380 | Horizontally Transferred (high confidence)   | AZOBR_200140 | Ancestral (low confidence)                   |
| AZOLI_p10381 | Horizontally Transferred (high confidence)   | AZOBR_200141 | Ancestral (low confidence)                   |
| AZOLI_p10382 | Horizontally Transferred (high confidence)   | AZOBR_200142 | Horizontally Transferred (medium confidence) |
| AZOLI_p10383 | Horizontally Transferred (high confidence)   | AZOBR_200143 | Ancestral (high confidence)                  |
| AZOLI_p10384 | Horizontally Transferred (high confidence)   | AZOBR_200144 | Ancestral (medium confidence)                |
| AZOLI_p10385 | Horizontally Transferred (high confidence)   | AZOBR_200145 | Ancestral (medium confidence)                |
| AZOLI_p10386 | Horizontally Transferred (high confidence)   | AZOBR_200146 | Horizontally Transferred (high confidence)   |
| AZOLI_p10387 | Horizontally Transferred (high confidence)   | AZOBR_200147 | Unassigned                                   |
| AZOLI_p10388 | Horizontally Transferred (high confidence)   | AZOBR_200148 | Ancestral (low confidence)                   |
| AZOLI_p10389 | Unassigned                                   | AZOBR_200149 | Ancestral (low confidence)                   |
| AZOLI_p10390 | Ancestral (low confidence)                   | AZOBR_200150 | Unassigned                                   |
| AZOLI_p10391 | Horizontally Transferred (high confidence)   | AZOBR_200151 | Ancestral (high confidence)                  |
| AZOLI_p10392 | Horizontally Transferred (high confidence)   | AZOBR_200152 | Ancestral (high confidence)                  |
| AZOLI_p10393 | Horizontally Transferred (high confidence)   | AZOBR_200153 | Ancestral (high confidence)                  |
| AZOLI_p10394 | Unassigned                                   | AZOBR_200154 | Ancestral (medium confidence)                |
| AZOLI_p10395 | Horizontally Transferred (high confidence)   | AZOBR_200155 | Ancestral (medium confidence)                |
| AZOLI_p10397 | Horizontally Transferred (high confidence)   | AZOBR_200156 | Horizontally Transferred (high confidence)   |
| AZOLI_p10398 | Horizontally Transferred (high confidence)   | AZOBR_200157 | Ancestral (low confidence)                   |
| AZOLI_p10399 | Horizontally Transferred (high confidence)   | AZOBR_200158 | Ancestral (high confidence)                  |
| AZOLI_p10400 | Horizontally Transferred (high confidence)   | AZOBR_200159 | Unassigned                                   |
| AZOLI_p10401 | Horizontally Transferred (high confidence)   | AZOBR_200160 | Ancestral (high confidence)                  |
| AZOLI_p10403 | Horizontally Transferred (high confidence)   | AZOBR_200161 | Horizontally Transferred (high confidence)   |
| AZOLI_p10404 | Horizontally Transferred (high confidence)   | AZOBR_200162 | Ancestral (medium confidence)                |
| AZOLI_p10405 | Horizontally Transferred (medium confidence) | AZOBR_200163 | Ancestral (high confidence)                  |
| AZOLI_p10406 | Unassigned                                   | AZOBR_200164 | Ancestral (high confidence)                  |
| AZOLI_p10407 | Unassigned                                   | AZOBR_200165 | Unassigned                                   |
| AZOLI_p10410 | Unassigned                                   | AZOBR_200166 | Ancestral (high confidence)                  |
| AZOLI_p10413 | Ancestral (high confidence)                  | AZOBR_200167 | Ancestral (low confidence)                   |
| AZOLI_p10414 | Ancestral (high confidence)                  | AZOBR_200168 | Ancestral (high confidence)                  |
| AZOLI_p10415 | Ancestral (low confidence)                   | AZOBR_200169 | Unassigned                                   |
| AZOLI_p10417 | Unassigned                                   | AZOBR_200170 | Horizontally Transferred (medium confidence) |
| AZOLI_p10419 | Unassigned                                   | AZOBR_200171 | Unassigned                                   |
| AZOLI_p10421 | Unassigned                                   | AZOBR_200172 | Ancestral (high confidence)                  |
| AZOLI_p10422 | Unassigned                                   | AZOBR_200173 | Horizontally Transferred (high confidence)   |
| AZOLI_p10426 | Horizontally Transferred (high confidence)   | AZOBR_200174 | Horizontally Transferred (high confidence)   |
| AZOLI_p10427 | Unassigned                                   | AZOBR_200175 | Ancestral (low confidence)                   |
| AZOLI_p10429 | Horizontally Transferred (high confidence)   | AZOBR_200176 | Ancestral (high confidence)                  |
| AZOLI_p10430 | Horizontally Transferred (high confidence)   | AZOBR_200177 | Horizontally Transferred (high confidence)   |
| AZOLI_p10431 | Unassigned                                   | AZOBR_200178 | Ancestral (low confidence)                   |
| AZOLI_p10433 | Unassigned                                   | AZOBR_200179 | Ancestral (high confidence)                  |
| AZOLI_p10434 | Ancestral (high confidence)                  | AZOBR_200180 | Unassigned                                   |
| AZOLI_p10435 | Ancestral (medium confidence)                | AZOBR_200181 | Ancestral (medium confidence)                |
| AZOLI_p10436 | Ancestral (high confidence)                  | AZOBR_200182 | Ancestral (low confidence)                   |
| AZOLI_p10437 | Horizontally Transferred (medium confidence) | AZOBR_200183 | Ancestral (low confidence)                   |
| AZOLI_p10438 | Horizontally Transferred (high confidence)   | AZOBR_200184 | Ancestral (low confidence)                   |
| AZOLI_p10440 | Horizontally Transferred (high confidence)   | AZOBR_200185 | Unassigned                                   |
| AZOLI_p10441 | Horizontally Transferred (high confidence)   | AZOBR_200186 | Ancestral (high confidence)                  |
| AZOLI_p10442 | Ancestral (high confidence)                  | AZOBR_200187 | Ancestral (medium confidence)                |
| AZOLI_p10443 | Horizontally Transferred (high confidence)   | AZOBR_200188 | Ancestral (high confidence)                  |
| AZOLI_p10444 | Unassigned                                   | AZOBR_200189 | Ancestral (low confidence)                   |
| AZOLI_p10445 | Unassigned                                   | AZOBR_200190 | Ancestral (low confidence)                   |
| AZOLI_p10446 | Unassigned                                   | AZOBR_200191 | Unassigned                                   |
| AZOLI_p10447 | Unassigned                                   | AZOBR_200192 | Ancestral (medium confidence)                |
| AZOLI_p10448 | Horizontally Transferred (high confidence)   | AZOBR_200193 | Horizontally Transferred (low confidence)    |
| AZOLI_p10449 | Ancestral (low confidence)                   | AZOBR_200194 | Horizontally Transferred (high confidence)   |
| AZOLI_p10450 | Horizontally Transferred (high confidence)   | AZOBR_200195 | Ancestral (medium confidence)                |
| AZOLI_p10451 | Unassigned                                   | AZOBR_200196 | Ancestral (medium confidence)                |
| AZOLI_p10452 | Horizontally Transferred (low confidence)    | AZOBR_200197 | Ancestral (low confidence)                   |
| AZOLI_p10453 | Horizontally Transferred (high confidence)   | AZOBR_200198 | Ancestral (low confidence)                   |
| AZOLI_p10454 | Ancestral (medium confidence)                | AZOBR_200199 | Horizontally Transferred (high confidence)   |
| AZOLI_p10455 | Unassigned                                   | AZOBR_200200 | Ancestral (low confidence)                   |
| AZOLI_p10456 | Horizontally Transferred (low confidence)    | AZOBR_200201 | Ancestral (low confidence)                   |
| AZOLI_p10457 | Ancestral (low confidence)                   | AZOBR_200202 | Unassigned                                   |
| AZOLI_p10458 | Unassigned                                   | AZOBR_200203 | Ancestral (low confidence)                   |
| AZOLI_p10459 | Horizontally Transferred (low confidence)    | AZOBR_200204 | Horizontally Transferred (high confidence)   |
| AZOLI_p10460 | Horizontally Transferred (low confidence)    | AZOBR_200205 | Horizontally Transferred (medium confidence) |
| AZOLI_p10461 | Unassigned                                   | AZOBR_200206 | Ancestral (low confidence)                   |
| AZOLI_p10462 | Unassigned                                   | AZOBR_200207 | Ancestral (low confidence)                   |
| AZOLI_p10463 | Ancestral (high confidence)                  | AZOBR_200208 | Ancestral (medium confidence)                |
| AZOLI_p10464 | Horizontally Transferred (high confidence)   | AZOBR_200209 | Ancestral (medium confidence)                |
| AZOLI_p10465 | Horizontally Transferred (high confidence)   | AZOBR_200210 | Ancestral (medium confidence)                |
| AZOLI_p10466 | Unassigned                                   | AZOBR_200211 | Ancestral (medium confidence)                |





































































|              |                                              |               |                                              |
|--------------|----------------------------------------------|---------------|----------------------------------------------|
| AZOLI_p40611 | Ancestral (high confidence)                  | AZOBR_p230098 | Horizontally Transferred (low confidence)    |
| AZOLI_p40612 | Ancestral (low confidence)                   | AZOBR_p240001 | Horizontally Transferred (high confidence)   |
| AZOLI_p40614 | Ancestral (medium confidence)                | AZOBR_p240002 | Horizontally Transferred (high confidence)   |
| AZOLI_p40615 | Ancestral (low confidence)                   | AZOBR_p250001 | Horizontally Transferred (high confidence)   |
| AZOLI_p40616 | Ancestral (medium confidence)                | AZOBR_p250002 | Unassigned                                   |
| AZOLI_p40617 | Unassigned                                   | AZOBR_p250003 | Unassigned                                   |
| AZOLI_p40619 | Horizontally Transferred (high confidence)   | AZOBR_p250004 | Unassigned                                   |
| AZOLI_p40620 | Ancestral (medium confidence)                | AZOBR_p250005 | Ancestral (high confidence)                  |
| AZOLI_p40621 | Ancestral (high confidence)                  | AZOBR_p250006 | Unassigned                                   |
| AZOLI_p40622 | Unassigned                                   | AZOBR_p250007 | Ancestral (high confidence)                  |
| AZOLI_p40624 | Ancestral (medium confidence)                | AZOBR_p250008 | Horizontally Transferred (medium confidence) |
| AZOLI_p40625 | Unassigned                                   | AZOBR_p250009 | Horizontally Transferred (high confidence)   |
| AZOLI_p40626 | Ancestral (medium confidence)                | AZOBR_p250010 | Horizontally Transferred (high confidence)   |
| AZOLI_p40629 | Ancestral (medium confidence)                | AZOBR_p250011 | Horizontally Transferred (high confidence)   |
| AZOLI_p40630 | Ancestral (low confidence)                   | AZOBR_p250012 | Ancestral (low confidence)                   |
| AZOLI_p40631 | Ancestral (low confidence)                   | AZOBR_p250013 | Horizontally Transferred (high confidence)   |
| AZOLI_p40632 | Ancestral (high confidence)                  | AZOBR_p250014 | Unassigned                                   |
| AZOLI_p40633 | Ancestral (high confidence)                  | AZOBR_p260001 | Horizontally Transferred (high confidence)   |
| AZOLI_p40634 | Ancestral (high confidence)                  | AZOBR_p260002 | Unassigned                                   |
| AZOLI_p40635 | Horizontally Transferred (high confidence)   | AZOBR_p260003 | Horizontally Transferred (high confidence)   |
| AZOLI_p40637 | Ancestral (high confidence)                  | AZOBR_p260004 | Unassigned                                   |
| AZOLI_p40638 | Ancestral (high confidence)                  | AZOBR_p260005 | Unassigned                                   |
| AZOLI_p40640 | Horizontally Transferred (high confidence)   | AZOBR_p260006 | Unassigned                                   |
| AZOLI_p40641 | Ancestral (low confidence)                   | AZOBR_p260007 | Horizontally Transferred (high confidence)   |
| AZOLI_p40642 | Unassigned                                   | AZOBR_p260008 | Ancestral (low confidence)                   |
| AZOLI_p40643 | Ancestral (high confidence)                  | AZOBR_p260009 | Horizontally Transferred (high confidence)   |
| AZOLI_p40644 | Horizontally Transferred (high confidence)   | AZOBR_p260010 | Unassigned                                   |
| AZOLI_p40645 | Horizontally Transferred (medium confidence) | AZOBR_p260011 | Horizontally Transferred (high confidence)   |
| AZOLI_p40646 | Ancestral (medium confidence)                | AZOBR_p260012 | Ancestral (low confidence)                   |
| AZOLI_p40647 | Ancestral (medium confidence)                | AZOBR_p260013 | Ancestral (low confidence)                   |
| AZOLI_p40648 | Ancestral (medium confidence)                | AZOBR_p260014 | Ancestral (low confidence)                   |
| AZOLI_p40649 | Ancestral (low confidence)                   | AZOBR_p260015 | Unassigned                                   |
| AZOLI_p40651 | Ancestral (medium confidence)                | AZOBR_p260016 | Unassigned                                   |
| AZOLI_p40653 | Ancestral (medium confidence)                | AZOBR_p260017 | Unassigned                                   |
| AZOLI_p40654 | Ancestral (high confidence)                  | AZOBR_p260018 | Horizontally Transferred (high confidence)   |
| AZOLI_p40655 | Ancestral (high confidence)                  | AZOBR_p260019 | Ancestral (low confidence)                   |
| AZOLI_p40656 | Ancestral (medium confidence)                | AZOBR_p260020 | Horizontally Transferred (medium confidence) |
| AZOLI_p40658 | Ancestral (medium confidence)                | AZOBR_p260021 | Unassigned                                   |
| AZOLI_p50001 | Horizontally Transferred (high confidence)   | AZOBR_p260022 | Horizontally Transferred (high confidence)   |
| AZOLI_p50002 | Unassigned                                   | AZOBR_p260023 | Unassigned                                   |
| AZOLI_p50003 | Unassigned                                   | AZOBR_p260024 | Unassigned                                   |
| AZOLI_p50004 | Ancestral (low confidence)                   | AZOBR_p260025 | Horizontally Transferred (high confidence)   |
| AZOLI_p50005 | Horizontally Transferred (high confidence)   | AZOBR_p260026 | Unassigned                                   |
| AZOLI_p50006 | Horizontally Transferred (high confidence)   | AZOBR_p260027 | Unassigned                                   |
| AZOLI_p50007 | Ancestral (high confidence)                  | AZOBR_p260028 | Unassigned                                   |
| AZOLI_p50008 | Ancestral (low confidence)                   | AZOBR_p260029 | Unassigned                                   |
| AZOLI_p50009 | Ancestral (low confidence)                   | AZOBR_p260030 | Unassigned                                   |
| AZOLI_p50010 | Ancestral (low confidence)                   | AZOBR_p260031 | Ancestral (low confidence)                   |
| AZOLI_p50011 | Ancestral (low confidence)                   | AZOBR_p270001 | Unassigned                                   |
| AZOLI_p50012 | Ancestral (high confidence)                  | AZOBR_p270002 | Unassigned                                   |
| AZOLI_p50013 | Ancestral (medium confidence)                | AZOBR_p270003 | Ancestral (medium confidence)                |
| AZOLI_p50014 | Ancestral (low confidence)                   | AZOBR_p270004 | Ancestral (low confidence)                   |
| AZOLI_p50015 | Ancestral (medium confidence)                | AZOBR_p270005 | Ancestral (medium confidence)                |
| AZOLI_p50016 | Ancestral (high confidence)                  | AZOBR_p270006 | Ancestral (low confidence)                   |
| AZOLI_p50017 | Ancestral (high confidence)                  | AZOBR_p270007 | Unassigned                                   |
| AZOLI_p50018 | Ancestral (medium confidence)                | AZOBR_p270008 | Unassigned                                   |
| AZOLI_p50019 | Horizontally Transferred (high confidence)   | AZOBR_p270009 | Unassigned                                   |
| AZOLI_p50020 | Ancestral (high confidence)                  | AZOBR_p270010 | Horizontally Transferred (high confidence)   |
| AZOLI_p50021 | Ancestral (low confidence)                   | AZOBR_p270011 | Unassigned                                   |
| AZOLI_p50022 | Ancestral (high confidence)                  | AZOBR_p270012 | Horizontally Transferred (high confidence)   |
| AZOLI_p50023 | Ancestral (medium confidence)                | AZOBR_p270013 | Unassigned                                   |
| AZOLI_p50024 | Ancestral (high confidence)                  | AZOBR_p270014 | Ancestral (low confidence)                   |
| AZOLI_p50025 | Ancestral (medium confidence)                | AZOBR_p270015 | Unassigned                                   |
| AZOLI_p50026 | Ancestral (medium confidence)                | AZOBR_p270016 | Ancestral (high confidence)                  |
| AZOLI_p50027 | Ancestral (high confidence)                  | AZOBR_p270017 | Ancestral (high confidence)                  |
| AZOLI_p50028 | Ancestral (medium confidence)                | AZOBR_p270018 | Ancestral (low confidence)                   |
| AZOLI_p50029 | Ancestral (medium confidence)                | AZOBR_p270019 | Ancestral (low confidence)                   |
| AZOLI_p50030 | Horizontally Transferred (high confidence)   | AZOBR_p270020 | Ancestral (low confidence)                   |
| AZOLI_p50031 | Ancestral (high confidence)                  | AZOBR_p270021 | Unassigned                                   |
| AZOLI_p50032 | Horizontally Transferred (high confidence)   | AZOBR_p270022 | Horizontally Transferred (low confidence)    |
| AZOLI_p50033 | Horizontally Transferred (high confidence)   | AZOBR_p270023 | Horizontally Transferred (high confidence)   |
| AZOLI_p50035 | Ancestral (medium confidence)                | AZOBR_p270024 | Ancestral (low confidence)                   |
| AZOLI_p50036 | Unassigned                                   | AZOBR_p270025 | Horizontally Transferred (high confidence)   |
| AZOLI_p50037 | Ancestral (medium confidence)                | AZOBR_p270026 | Ancestral (low confidence)                   |
| AZOLI_p50038 | Ancestral (low confidence)                   | AZOBR_p270027 | Ancestral (low confidence)                   |



















|              |                                            |               |                                              |
|--------------|--------------------------------------------|---------------|----------------------------------------------|
| AZOLI_p60245 | Horizontally Transferred (low confidence)  | AZOBR_p310174 | Ancestral (medium confidence)                |
| AZOLI_p60246 | Ancestral (low confidence)                 | AZOBR_p310175 | Ancestral (medium confidence)                |
| AZOLI_p60251 | Ancestral (low confidence)                 | AZOBR_p310176 | Horizontally Transferred (medium confidence) |
| AZOLI_p60252 | Ancestral (low confidence)                 | AZOBR_p310177 | Ancestral (low confidence)                   |
| AZOLI_p60253 | Ancestral (low confidence)                 | AZOBR_p310178 | Unassigned                                   |
| AZOLI_p60254 | Unassigned                                 | AZOBR_p310179 | Horizontally Transferred (medium confidence) |
| AZOLI_p60256 | Ancestral (low confidence)                 | AZOBR_p310180 | Horizontally Transferred (medium confidence) |
| AZOLI_p60259 | Horizontally Transferred (high confidence) | AZOBR_p310181 | Unassigned                                   |
| AZOLI_p60260 | Ancestral (low confidence)                 | AZOBR_p310182 | Horizontally Transferred (high confidence)   |
| AZOLI_p60261 | Horizontally Transferred (high confidence) | AZOBR_p310183 | Unassigned                                   |
| AZOLI_p60262 | Unassigned                                 | AZOBR_p310184 | Horizontally Transferred (medium confidence) |
| AZOLI_p60263 | Horizontally Transferred (high confidence) | AZOBR_p310185 | Ancestral (low confidence)                   |
| AZOLI_p60264 | Horizontally Transferred (high confidence) | AZOBR_p310186 | Ancestral (low confidence)                   |
| AZOLI_p60265 | Horizontally Transferred (high confidence) | AZOBR_p310187 | Ancestral (low confidence)                   |
| AZOLI_p60266 | Ancestral (low confidence)                 | AZOBR_p310188 | Ancestral (low confidence)                   |
|              |                                            | AZOBR_p310189 | Unassigned                                   |
|              |                                            | AZOBR_p310190 | Ancestral (low confidence)                   |
|              |                                            | AZOBR_p310191 | Horizontally Transferred (medium confidence) |
|              |                                            | AZOBR_p310192 | Horizontally Transferred (medium confidence) |
|              |                                            | AZOBR_p310193 | Horizontally Transferred (high confidence)   |
|              |                                            | AZOBR_p310194 | Ancestral (low confidence)                   |
|              |                                            | AZOBR_p310195 | Ancestral (low confidence)                   |
|              |                                            | AZOBR_p310196 | Unassigned                                   |
|              |                                            | AZOBR_p310197 | Horizontally Transferred (high confidence)   |
|              |                                            | AZOBR_p310198 | Horizontally Transferred (high confidence)   |
|              |                                            | AZOBR_p310199 | Horizontally Transferred (high confidence)   |
|              |                                            | AZOBR_p310200 | Horizontally Transferred (high confidence)   |
|              |                                            | AZOBR_p310201 | Horizontally Transferred (high confidence)   |
|              |                                            | AZOBR_p310202 | Horizontally Transferred (high confidence)   |
|              |                                            | AZOBR_p310203 | Ancestral (high confidence)                  |
|              |                                            | AZOBR_p310204 | Ancestral (low confidence)                   |
|              |                                            | AZOBR_p310205 | Ancestral (medium confidence)                |
|              |                                            | AZOBR_p310206 | Ancestral (medium confidence)                |
|              |                                            | AZOBR_p310207 | Ancestral (low confidence)                   |
|              |                                            | AZOBR_p310208 | Ancestral (low confidence)                   |
|              |                                            | AZOBR_p310209 | Horizontally Transferred (high confidence)   |
|              |                                            | AZOBR_p310210 | Horizontally Transferred (high confidence)   |
|              |                                            | AZOBR_p310211 | Horizontally Transferred (high confidence)   |
|              |                                            | AZOBR_p310212 | Unassigned                                   |
|              |                                            | AZOBR_p310213 | Ancestral (low confidence)                   |
|              |                                            | AZOBR_p310214 | Ancestral (medium confidence)                |
|              |                                            | AZOBR_p310215 | Horizontally Transferred (high confidence)   |
|              |                                            | AZOBR_p310216 | Unassigned                                   |
|              |                                            | AZOBR_p310217 | Horizontally Transferred (high confidence)   |
|              |                                            | AZOBR_p310218 | Horizontally Transferred (high confidence)   |
|              |                                            | AZOBR_p310219 | Ancestral (low confidence)                   |
|              |                                            | AZOBR_p310220 | Horizontally Transferred (high confidence)   |
|              |                                            | AZOBR_p310221 | Ancestral (low confidence)                   |
|              |                                            | AZOBR_p310222 | Horizontally Transferred (high confidence)   |
|              |                                            | AZOBR_p310223 | Horizontally Transferred (high confidence)   |
|              |                                            | AZOBR_p310224 | Ancestral (low confidence)                   |
|              |                                            | AZOBR_p310225 | Unassigned                                   |
|              |                                            | AZOBR_p310226 | Horizontally Transferred (high confidence)   |
|              |                                            | AZOBR_p310227 | Horizontally Transferred (medium confidence) |
|              |                                            | AZOBR_p310228 | Horizontally Transferred (high confidence)   |
|              |                                            | AZOBR_p310229 | Horizontally Transferred (high confidence)   |
|              |                                            | AZOBR_p310230 | Horizontally Transferred (high confidence)   |
|              |                                            | AZOBR_p310231 | Horizontally Transferred (high confidence)   |
|              |                                            | AZOBR_p310232 | Horizontally Transferred (high confidence)   |
|              |                                            | AZOBR_p310233 | Horizontally Transferred (high confidence)   |
|              |                                            | AZOBR_p310234 | Horizontally Transferred (high confidence)   |
|              |                                            | AZOBR_p310235 | Horizontally Transferred (high confidence)   |
|              |                                            | AZOBR_p310236 | Horizontally Transferred (high confidence)   |
|              |                                            | AZOBR_p310237 | Horizontally Transferred (high confidence)   |
|              |                                            | AZOBR_p310238 | Horizontally Transferred (medium confidence) |
|              |                                            | AZOBR_p310239 | Horizontally Transferred (high confidence)   |
|              |                                            | AZOBR_p310240 | Horizontally Transferred (medium confidence) |
|              |                                            | AZOBR_p310241 | Unassigned                                   |
|              |                                            | AZOBR_p310242 | Ancestral (low confidence)                   |
|              |                                            | AZOBR_p310243 | Unassigned                                   |
|              |                                            | AZOBR_p310244 | Ancestral (low confidence)                   |
|              |                                            | AZOBR_p310245 | Ancestral (low confidence)                   |
|              |                                            | AZOBR_p310246 | Unassigned                                   |
|              |                                            | AZOBR_p310247 | Horizontally Transferred (high confidence)   |
|              |                                            | AZOBR_p310248 | Horizontally Transferred (high confidence)   |

|  |               |                                              |
|--|---------------|----------------------------------------------|
|  | AZOBR_p310249 | Horizontally Transferred (high confidence)   |
|  | AZOBR_p310250 | Horizontally Transferred (high confidence)   |
|  | AZOBR_p310251 | Horizontally Transferred (high confidence)   |
|  | AZOBR_p310252 | Horizontally Transferred (high confidence)   |
|  | AZOBR_p310253 | Horizontally Transferred (high confidence)   |
|  | AZOBR_p310254 | Horizontally Transferred (high confidence)   |
|  | AZOBR_p310255 | Ancestral (low confidence)                   |
|  | AZOBR_p310256 | Ancestral (low confidence)                   |
|  | AZOBR_p310257 | Horizontally Transferred (high confidence)   |
|  | AZOBR_p310258 | Ancestral (high confidence)                  |
|  | AZOBR_p310259 | Ancestral (low confidence)                   |
|  | AZOBR_p310260 | Ancestral (low confidence)                   |
|  | AZOBR_p310261 | Unassigned                                   |
|  | AZOBR_p310262 | Unassigned                                   |
|  | AZOBR_p310263 | Unassigned                                   |
|  | AZOBR_p310264 | Unassigned                                   |
|  | AZOBR_p310265 | Horizontally Transferred (medium confidence) |
|  | AZOBR_p310266 | Horizontally Transferred (medium confidence) |
|  | AZOBR_p310267 | Horizontally Transferred (medium confidence) |
|  | AZOBR_p310268 | Ancestral (low confidence)                   |
|  | AZOBR_p310269 | Horizontally Transferred (high confidence)   |
|  | AZOBR_p310270 | Horizontally Transferred (high confidence)   |
|  | AZOBR_p310271 | Unassigned                                   |
|  | AZOBR_p310272 | Horizontally Transferred (high confidence)   |
|  | AZOBR_p310273 | Horizontally Transferred (high confidence)   |
|  | AZOBR_p310274 | Ancestral (low confidence)                   |
|  | AZOBR_p310275 | Ancestral (low confidence)                   |
|  | AZOBR_p310276 | Ancestral (low confidence)                   |
|  | AZOBR_p310277 | Ancestral (low confidence)                   |
|  | AZOBR_p310278 | Ancestral (low confidence)                   |
|  | AZOBR_p310279 | Ancestral (low confidence)                   |
|  | AZOBR_p310280 | Ancestral (low confidence)                   |
|  | AZOBR_p310281 | Ancestral (low confidence)                   |
|  | AZOBR_p310282 | Horizontally Transferred (high confidence)   |
|  | AZOBR_p310283 | Unassigned                                   |
|  | AZOBR_p310284 | Ancestral (low confidence)                   |
|  | AZOBR_p310285 | Ancestral (low confidence)                   |
|  | AZOBR_p310286 | Horizontally Transferred (high confidence)   |
|  | AZOBR_p310287 | Horizontally Transferred (high confidence)   |
|  | AZOBR_p310288 | Unassigned                                   |
|  | AZOBR_p310289 | Ancestral (low confidence)                   |
|  | AZOBR_p310290 | Horizontally Transferred (high confidence)   |
|  | AZOBR_p310291 | Horizontally Transferred (high confidence)   |
|  | AZOBR_p310292 | Horizontally Transferred (high confidence)   |
|  | AZOBR_p310293 | Horizontally Transferred (high confidence)   |
|  | AZOBR_p310294 | Unassigned                                   |
|  | AZOBR_p310295 | Horizontally Transferred (medium confidence) |
|  | AZOBR_p310296 | Horizontally Transferred (high confidence)   |
|  | AZOBR_p310297 | Horizontally Transferred (high confidence)   |
|  | AZOBR_p310298 | Horizontally Transferred (high confidence)   |
|  | AZOBR_p310299 | Horizontally Transferred (high confidence)   |
|  | AZOBR_p310300 | Unassigned                                   |
|  | AZOBR_p310301 | Unassigned                                   |
|  | AZOBR_p310302 | Unassigned                                   |
|  | AZOBR_p310303 | Horizontally Transferred (high confidence)   |
|  | AZOBR_p310304 | Unassigned                                   |
|  | AZOBR_p310305 | Unassigned                                   |
|  | AZOBR_p310306 | Horizontally Transferred (high confidence)   |
|  | AZOBR_p310307 | Horizontally Transferred (high confidence)   |
|  | AZOBR_p310308 | Horizontally Transferred (high confidence)   |
|  | AZOBR_p310309 | Horizontally Transferred (high confidence)   |
|  | AZOBR_p310310 | Unassigned                                   |
|  | AZOBR_p310311 | Unassigned                                   |
|  | AZOBR_p310312 | Ancestral (low confidence)                   |
|  | AZOBR_p310313 | Horizontally Transferred (low confidence)    |
|  | AZOBR_p310314 | Ancestral (low confidence)                   |
|  | AZOBR_p310315 | Horizontally Transferred (low confidence)    |
|  | AZOBR_p310316 | Horizontally Transferred (low confidence)    |
|  | AZOBR_p310317 | Horizontally Transferred (medium confidence) |
|  | AZOBR_p310318 | Horizontally Transferred (high confidence)   |
|  | AZOBR_p310319 | Unassigned                                   |
|  | AZOBR_p310320 | Horizontally Transferred (high confidence)   |
|  | AZOBR_p310321 | Ancestral (low confidence)                   |
|  | AZOBR_p310322 | Horizontally Transferred (high confidence)   |
|  | AZOBR_p310323 | Horizontally Transferred (low confidence)    |

|  |               |                                              |
|--|---------------|----------------------------------------------|
|  | AZOBR_p310324 | Horizontally Transferred (medium confidence) |
|  | AZOBR_p310325 | Horizontally Transferred (medium confidence) |
|  | AZOBR_p310326 | Unassigned                                   |
|  | AZOBR_p310327 | Horizontally Transferred (high confidence)   |
|  | AZOBR_p310328 | Horizontally Transferred (high confidence)   |
|  | AZOBR_p310329 | Horizontally Transferred (high confidence)   |
|  | AZOBR_p310330 | Unassigned                                   |
|  | AZOBR_p310331 | Unassigned                                   |
|  | AZOBR_p310332 | Unassigned                                   |
|  | AZOBR_p310333 | Horizontally Transferred (high confidence)   |
|  | AZOBR_p310334 | Horizontally Transferred (high confidence)   |
|  | AZOBR_p310335 | Horizontally Transferred (high confidence)   |
|  | AZOBR_p310336 | Unassigned                                   |
|  | AZOBR_p310337 | Unassigned                                   |
|  | AZOBR_p310338 | Horizontally Transferred (high confidence)   |
|  | AZOBR_p320001 | Horizontally Transferred (high confidence)   |
|  | AZOBR_p320002 | Unassigned                                   |
|  | AZOBR_p320003 | Unassigned                                   |
|  | AZOBR_p330001 | Unassigned                                   |
|  | AZOBR_p330002 | Horizontally Transferred (high confidence)   |
|  | AZOBR_p330003 | Ancestral (low confidence)                   |
|  | AZOBR_p330004 | Horizontally Transferred (medium confidence) |
|  | AZOBR_p330005 | Horizontally Transferred (high confidence)   |
|  | AZOBR_p330006 | Unassigned                                   |
|  | AZOBR_p330007 | Ancestral (low confidence)                   |
|  | AZOBR_p330008 | Unassigned                                   |
|  | AZOBR_p330009 | Unassigned                                   |
|  | AZOBR_p330010 | Horizontally Transferred (high confidence)   |
|  | AZOBR_p330011 | Horizontally Transferred (high confidence)   |
|  | AZOBR_p330012 | Ancestral (low confidence)                   |
|  | AZOBR_p330013 | Horizontally Transferred (low confidence)    |
|  | AZOBR_p330014 | Horizontally Transferred (medium confidence) |
|  | AZOBR_p330015 | Horizontally Transferred (high confidence)   |
|  | AZOBR_p330016 | Horizontally Transferred (high confidence)   |
|  | AZOBR_p330017 | Horizontally Transferred (high confidence)   |
|  | AZOBR_p330018 | Horizontally Transferred (high confidence)   |
|  | AZOBR_p330019 | Horizontally Transferred (high confidence)   |
|  | AZOBR_p330020 | Horizontally Transferred (low confidence)    |
|  | AZOBR_p330021 | Horizontally Transferred (high confidence)   |
|  | AZOBR_p330022 | Horizontally Transferred (high confidence)   |
|  | AZOBR_p330023 | Ancestral (low confidence)                   |
|  | AZOBR_p330024 | Ancestral (low confidence)                   |
|  | AZOBR_p330025 | Ancestral (low confidence)                   |
|  | AZOBR_p330026 | Horizontally Transferred (high confidence)   |
|  | AZOBR_p330027 | Horizontally Transferred (high confidence)   |
|  | AZOBR_p330028 | Horizontally Transferred (high confidence)   |
|  | AZOBR_p330029 | Ancestral (low confidence)                   |
|  | AZOBR_p330030 | Ancestral (low confidence)                   |
|  | AZOBR_p330031 | Ancestral (medium confidence)                |
|  | AZOBR_p330032 | Ancestral (medium confidence)                |
|  | AZOBR_p330033 | Unassigned                                   |
|  | AZOBR_p330034 | Unassigned                                   |
|  | AZOBR_p330035 | Unassigned                                   |
|  | AZOBR_p330036 | Horizontally Transferred (high confidence)   |
|  | AZOBR_p330037 | Unassigned                                   |
|  | AZOBR_p330038 | Unassigned                                   |
|  | AZOBR_p330039 | Horizontally Transferred (high confidence)   |
|  | AZOBR_p330040 | Horizontally Transferred (high confidence)   |
|  | AZOBR_p330041 | Unassigned                                   |
|  | AZOBR_p330042 | Ancestral (medium confidence)                |
|  | AZOBR_p330043 | Ancestral (high confidence)                  |
|  | AZOBR_p330044 | Horizontally Transferred (high confidence)   |
|  | AZOBR_p330045 | Horizontally Transferred (high confidence)   |
|  | AZOBR_p330046 | Horizontally Transferred (high confidence)   |
|  | AZOBR_p330047 | Ancestral (medium confidence)                |
|  | AZOBR_p330048 | Horizontally Transferred (high confidence)   |
|  | AZOBR_p330049 | Horizontally Transferred (high confidence)   |
|  | AZOBR_p330050 | Horizontally Transferred (high confidence)   |
|  | AZOBR_p330051 | Horizontally Transferred (high confidence)   |
|  | AZOBR_p330052 | Horizontally Transferred (high confidence)   |
|  | AZOBR_p330053 | Horizontally Transferred (high confidence)   |
|  | AZOBR_p330054 | Horizontally Transferred (high confidence)   |
|  | AZOBR_p330055 | Horizontally Transferred (high confidence)   |
|  | AZOBR_p330056 | Ancestral (low confidence)                   |
|  | AZOBR_p330057 | Horizontally Transferred (high confidence)   |



|  |               |                                              |
|--|---------------|----------------------------------------------|
|  | AZOBR_p330133 | Horizontally Transferred (medium confidence) |
|  | AZOBR_p330134 | Horizontally Transferred (high confidence)   |
|  | AZOBR_p330135 | Horizontally Transferred (high confidence)   |
|  | AZOBR_p330136 | Horizontally Transferred (high confidence)   |
|  | AZOBR_p330137 | Unassigned                                   |
|  | AZOBR_p330138 | Horizontally Transferred (high confidence)   |
|  | AZOBR_p330139 | Horizontally Transferred (high confidence)   |
|  | AZOBR_p330140 | Horizontally Transferred (high confidence)   |
|  | AZOBR_p330141 | Ancestral (medium confidence)                |
|  | AZOBR_p330142 | Unassigned                                   |
|  | AZOBR_p330143 | Horizontally Transferred (high confidence)   |
|  | AZOBR_p330144 | Horizontally Transferred (high confidence)   |
|  | AZOBR_p330145 | Horizontally Transferred (medium confidence) |
|  | AZOBR_p330146 | Horizontally Transferred (high confidence)   |
|  | AZOBR_p330147 | Horizontally Transferred (high confidence)   |
|  | AZOBR_p330148 | Horizontally Transferred (high confidence)   |
|  | AZOBR_p330149 | Horizontally Transferred (high confidence)   |
|  | AZOBR_p330150 | Horizontally Transferred (high confidence)   |
|  | AZOBR_p330151 | Horizontally Transferred (high confidence)   |
|  | AZOBR_p330152 | Ancestral (medium confidence)                |
|  | AZOBR_p330153 | Horizontally Transferred (high confidence)   |
|  | AZOBR_p330154 | Ancestral (low confidence)                   |
|  | AZOBR_p330155 | Unassigned                                   |
|  | AZOBR_p330156 | Ancestral (high confidence)                  |
|  | AZOBR_p330157 | Ancestral (high confidence)                  |
|  | AZOBR_p330158 | Ancestral (medium confidence)                |
|  | AZOBR_p330159 | Ancestral (low confidence)                   |
|  | AZOBR_p330160 | Horizontally Transferred (high confidence)   |
|  | AZOBR_p330161 | Unassigned                                   |
|  | AZOBR_p330162 | Unassigned                                   |
|  | AZOBR_p330163 | Ancestral (low confidence)                   |
|  | AZOBR_p340001 | Ancestral (low confidence)                   |
|  | AZOBR_p340002 | Ancestral (low confidence)                   |
|  | AZOBR_p340003 | Ancestral (low confidence)                   |
|  | AZOBR_p340004 | Ancestral (low confidence)                   |
|  | AZOBR_p340005 | Ancestral (low confidence)                   |
|  | AZOBR_p340006 | Unassigned                                   |
|  | AZOBR_p340007 | Unassigned                                   |
|  | AZOBR_p340008 | Horizontally Transferred (high confidence)   |
|  | AZOBR_p340009 | Unassigned                                   |
|  | AZOBR_p340010 | Horizontally Transferred (high confidence)   |
|  | AZOBR_p340011 | Horizontally Transferred (high confidence)   |
|  | AZOBR_p340012 | Unassigned                                   |
|  | AZOBR_p340013 | Ancestral (low confidence)                   |
|  | AZOBR_p340014 | Ancestral (low confidence)                   |
|  | AZOBR_p340015 | Horizontally Transferred (high confidence)   |
|  | AZOBR_p340016 | Horizontally Transferred (high confidence)   |
|  | AZOBR_p340017 | Unassigned                                   |
|  | AZOBR_p340018 | Ancestral (low confidence)                   |
|  | AZOBR_p340019 | Unassigned                                   |
|  | AZOBR_p340020 | Unassigned                                   |
|  | AZOBR_p340021 | Unassigned                                   |
|  | AZOBR_p340022 | Unassigned                                   |
|  | AZOBR_p340023 | Ancestral (low confidence)                   |
|  | AZOBR_p340024 | Horizontally Transferred (medium confidence) |
|  | AZOBR_p340025 | Ancestral (low confidence)                   |
|  | AZOBR_p340026 | Horizontally Transferred (high confidence)   |
|  | AZOBR_p340027 | Horizontally Transferred (high confidence)   |
|  | AZOBR_p340028 | Horizontally Transferred (high confidence)   |
|  | AZOBR_p340029 | Unassigned                                   |
|  | AZOBR_p340030 | Ancestral (medium confidence)                |
|  | AZOBR_p340031 | Ancestral (low confidence)                   |
|  | AZOBR_p340032 | Ancestral (low confidence)                   |
|  | AZOBR_p340033 | Unassigned                                   |
|  | AZOBR_p340034 | Unassigned                                   |
|  | AZOBR_p340035 | Unassigned                                   |
|  | AZOBR_p340036 | Horizontally Transferred (high confidence)   |
|  | AZOBR_p340037 | Unassigned                                   |
|  | AZOBR_p340038 | Horizontally Transferred (high confidence)   |
|  | AZOBR_p340039 | Horizontally Transferred (high confidence)   |
|  | AZOBR_p340040 | Horizontally Transferred (high confidence)   |
|  | AZOBR_p340041 | Horizontally Transferred (high confidence)   |
|  | AZOBR_p340042 | Unassigned                                   |
|  | AZOBR_p340043 | Horizontally Transferred (high confidence)   |
|  | AZOBR_p340044 | Horizontally Transferred (high confidence)   |



|  |               |                                              |
|--|---------------|----------------------------------------------|
|  | AZOBR_p340045 | Horizontally Transferred (high confidence)   |
|  | AZOBR_p340046 | Horizontally Transferred (high confidence)   |
|  | AZOBR_p340047 | Ancestral (low confidence)                   |
|  | AZOBR_p340048 | Unassigned                                   |
|  | AZOBR_p340049 | Horizontally Transferred (high confidence)   |
|  | AZOBR_p340050 | Unassigned                                   |
|  | AZOBR_p340051 | Horizontally Transferred (high confidence)   |
|  | AZOBR_p340052 | Horizontally Transferred (high confidence)   |
|  | AZOBR_p340053 | Horizontally Transferred (high confidence)   |
|  | AZOBR_p340054 | Unassigned                                   |
|  | AZOBR_p340055 | Unassigned                                   |
|  | AZOBR_p340056 | Ancestral (low confidence)                   |
|  | AZOBR_p340057 | Horizontally Transferred (high confidence)   |
|  | AZOBR_p340058 | Ancestral (medium confidence)                |
|  | AZOBR_p340059 | Ancestral (low confidence)                   |
|  | AZOBR_p340060 | Ancestral (low confidence)                   |
|  | AZOBR_p340061 | Ancestral (low confidence)                   |
|  | AZOBR_p340062 | Ancestral (medium confidence)                |
|  | AZOBR_p340063 | Ancestral (medium confidence)                |
|  | AZOBR_p340064 | Horizontally Transferred (high confidence)   |
|  | AZOBR_p340065 | Ancestral (medium confidence)                |
|  | AZOBR_p340066 | Ancestral (medium confidence)                |
|  | AZOBR_p340067 | Ancestral (low confidence)                   |
|  | AZOBR_p340068 | Unassigned                                   |
|  | AZOBR_p340069 | Ancestral (low confidence)                   |
|  | AZOBR_p340070 | Unassigned                                   |
|  | AZOBR_p340071 | Ancestral (low confidence)                   |
|  | AZOBR_p340072 | Horizontally Transferred (high confidence)   |
|  | AZOBR_p340073 | Horizontally Transferred (high confidence)   |
|  | AZOBR_p340074 | Horizontally Transferred (high confidence)   |
|  | AZOBR_p340075 | Horizontally Transferred (high confidence)   |
|  | AZOBR_p340076 | Horizontally Transferred (high confidence)   |
|  | AZOBR_p340077 | Unassigned                                   |
|  | AZOBR_p340078 | Ancestral (low confidence)                   |
|  | AZOBR_p340079 | Unassigned                                   |
|  | AZOBR_p340080 | Ancestral (medium confidence)                |
|  | AZOBR_p340081 | Ancestral (high confidence)                  |
|  | AZOBR_p340082 | Ancestral (low confidence)                   |
|  | AZOBR_p340083 | Horizontally Transferred (medium confidence) |
|  | AZOBR_p340084 | Horizontally Transferred (high confidence)   |
|  | AZOBR_p340085 | Horizontally Transferred (low confidence)    |
|  | AZOBR_p340086 | Horizontally Transferred (high confidence)   |
|  | AZOBR_p340087 | Unassigned                                   |
|  | AZOBR_p340088 | Unassigned                                   |
|  | AZOBR_p340089 | Horizontally Transferred (high confidence)   |
|  | AZOBR_p340090 | Unassigned                                   |
|  | AZOBR_p340091 | Unassigned                                   |
|  | AZOBR_p340092 | Ancestral (low confidence)                   |
|  | AZOBR_p340093 | Horizontally Transferred (high confidence)   |
|  | AZOBR_p340094 | Unassigned                                   |
|  | AZOBR_p340095 | Unassigned                                   |
|  | AZOBR_p340096 | Unassigned                                   |
|  | AZOBR_p340097 | Horizontally Transferred (high confidence)   |
|  | AZOBR_p340098 | Unassigned                                   |
|  | AZOBR_p340099 | Ancestral (medium confidence)                |
|  | AZOBR_p340100 | Ancestral (high confidence)                  |
|  | AZOBR_p340101 | Horizontally Transferred (high confidence)   |
|  | AZOBR_p340102 | Ancestral (low confidence)                   |
|  | AZOBR_p340103 | Ancestral (low confidence)                   |
|  | AZOBR_p340104 | Ancestral (low confidence)                   |
|  | AZOBR_p340105 | Horizontally Transferred (high confidence)   |
|  | AZOBR_p340106 | Unassigned                                   |
|  | AZOBR_p340107 | Unassigned                                   |
|  | AZOBR_p340108 | Ancestral (low confidence)                   |
|  | AZOBR_p340109 | Ancestral (low confidence)                   |
|  | AZOBR_p340110 | Horizontally Transferred (high confidence)   |
|  | AZOBR_p340111 | Unassigned                                   |
|  | AZOBR_p340112 | Unassigned                                   |
|  | AZOBR_p340113 | Horizontally Transferred (high confidence)   |
|  | AZOBR_p340114 | Ancestral (low confidence)                   |
|  | AZOBR_p340115 | Ancestral (low confidence)                   |
|  | AZOBR_p340116 | Horizontally Transferred (high confidence)   |
|  | AZOBR_p340117 | Horizontally Transferred (high confidence)   |
|  | AZOBR_p340118 | Ancestral (low confidence)                   |
|  | AZOBR_p340119 | Ancestral (low confidence)                   |

|  |               |                                            |
|--|---------------|--------------------------------------------|
|  | AZOBR_p340120 | Horizontally Transferred (low confidence)  |
|  | AZOBR_p340121 | Horizontally Transferred (low confidence)  |
|  | AZOBR_p340122 | Horizontally Transferred (low confidence)  |
|  | AZOBR_p340123 | Ancestral (low confidence)                 |
|  | AZOBR_p340124 | Unassigned                                 |
|  | AZOBR_p340125 | Horizontally Transferred (high confidence) |
|  | AZOBR_p340126 | Unassigned                                 |
|  | AZOBR_p340127 | Ancestral (low confidence)                 |
|  | AZOBR_p340128 | Horizontally Transferred (low confidence)  |
|  | AZOBR_p340129 | Horizontally Transferred (high confidence) |
|  | AZOBR_p340130 | Horizontally Transferred (high confidence) |
|  | AZOBR_p340131 | Unassigned                                 |
|  | AZOBR_p340132 | Unassigned                                 |
|  | AZOBR_p340133 | Unassigned                                 |
|  | AZOBR_p340134 | Unassigned                                 |
|  | AZOBR_p340135 | Horizontally Transferred (high confidence) |
|  | AZOBR_p340136 | Unassigned                                 |
|  | AZOBR_p340137 | Unassigned                                 |
|  | AZOBR_p340138 | Horizontally Transferred (low confidence)  |
|  | AZOBR_p340139 | Unassigned                                 |
|  | AZOBR_p340140 | Horizontally Transferred (high confidence) |
|  | AZOBR_p340141 | Unassigned                                 |
|  | AZOBR_p340142 | Horizontally Transferred (high confidence) |
|  | AZOBR_p340143 | Horizontally Transferred (high confidence) |
|  | AZOBR_p340144 | Horizontally Transferred (high confidence) |
|  | AZOBR_p340145 | Unassigned                                 |
|  | AZOBR_p340146 | Unassigned                                 |
|  | AZOBR_p340147 | Horizontally Transferred (high confidence) |
|  | AZOBR_p340148 | Unassigned                                 |
|  | AZOBR_p340149 | Horizontally Transferred (high confidence) |
|  | AZOBR_p340150 | Unassigned                                 |
|  | AZOBR_p340151 | Unassigned                                 |
|  | AZOBR_p340152 | Unassigned                                 |
|  | AZOBR_p340153 | Horizontally Transferred (high confidence) |
|  | AZOBR_p340154 | Ancestral (medium confidence)              |
|  | AZOBR_p340155 | Ancestral (low confidence)                 |
|  | AZOBR_p340156 | Unassigned                                 |
|  | AZOBR_p340157 | Ancestral (low confidence)                 |
|  | AZOBR_p340158 | Horizontally Transferred (high confidence) |
|  | AZOBR_p340159 | Unassigned                                 |
|  | AZOBR_p340160 | Unassigned                                 |
|  | AZOBR_p340161 | Unassigned                                 |
|  | AZOBR_p340162 | Horizontally Transferred (high confidence) |
|  | AZOBR_p340163 | Unassigned                                 |
|  | AZOBR_p340164 | Unassigned                                 |
|  | AZOBR_p340165 | Horizontally Transferred (high confidence) |
|  | AZOBR_p340166 | Horizontally Transferred (high confidence) |
|  | AZOBR_p340167 | Unassigned                                 |
|  | AZOBR_p340168 | Ancestral (medium confidence)              |
|  | AZOBR_p340169 | Unassigned                                 |
|  | AZOBR_p340170 | Unassigned                                 |
|  | AZOBR_p340171 | Unassigned                                 |
|  | AZOBR_p340172 | Unassigned                                 |
|  | AZOBR_p340173 | Unassigned                                 |
|  | AZOBR_p340174 | Unassigned                                 |
|  | AZOBR_p340175 | Unassigned                                 |
|  | AZOBR_p340176 | Unassigned                                 |
|  | AZOBR_p340177 | Unassigned                                 |
|  | AZOBR_p340178 | Unassigned                                 |
|  | AZOBR_p340179 | Unassigned                                 |
|  | AZOBR_p340180 | Horizontally Transferred (low confidence)  |
|  | AZOBR_p340181 | Horizontally Transferred (high confidence) |
|  | AZOBR_p340182 | Horizontally Transferred (high confidence) |
|  | AZOBR_p340183 | Horizontally Transferred (high confidence) |
|  | AZOBR_p340184 | Unassigned                                 |
|  | AZOBR_p340185 | Unassigned                                 |
|  | AZOBR_p340186 | Unassigned                                 |
|  | AZOBR_p340187 | Unassigned                                 |
|  | AZOBR_p340188 | Unassigned                                 |
|  | AZOBR_p340189 | Unassigned                                 |
|  | AZOBR_p340190 | Unassigned                                 |
|  | AZOBR_p340191 | Ancestral (high confidence)                |
|  | AZOBR_p340192 | Horizontally Transferred (high confidence) |
|  | AZOBR_p340193 | Unassigned                                 |
|  | AZOBR_p340194 | Ancestral (low confidence)                 |

|  |               |                                              |
|--|---------------|----------------------------------------------|
|  | AZOBR_p340195 | Unassigned                                   |
|  | AZOBR_p340196 | Horizontally Transferred (low confidence)    |
|  | AZOBR_p340197 | Horizontally Transferred (high confidence)   |
|  | AZOBR_p340198 | Unassigned                                   |
|  | AZOBR_p340199 | Horizontally Transferred (high confidence)   |
|  | AZOBR_p340200 | Ancestral (low confidence)                   |
|  | AZOBR_p340201 | Ancestral (low confidence)                   |
|  | AZOBR_p340202 | Horizontally Transferred (high confidence)   |
|  | AZOBR_p340203 | Horizontally Transferred (high confidence)   |
|  | AZOBR_p340204 | Unassigned                                   |
|  | AZOBR_p340205 | Ancestral (low confidence)                   |
|  | AZOBR_p340206 | Ancestral (low confidence)                   |
|  | AZOBR_p340207 | Unassigned                                   |
|  | AZOBR_p340208 | Horizontally Transferred (high confidence)   |
|  | AZOBR_p340209 | Horizontally Transferred (high confidence)   |
|  | AZOBR_p340210 | Horizontally Transferred (medium confidence) |
|  | AZOBR_p340211 | Ancestral (low confidence)                   |
|  | AZOBR_p340212 | Ancestral (low confidence)                   |
|  | AZOBR_p340213 | Ancestral (low confidence)                   |
|  | AZOBR_p340214 | Ancestral (low confidence)                   |
|  | AZOBR_p340215 | Horizontally Transferred (high confidence)   |
|  | AZOBR_p340216 | Ancestral (low confidence)                   |
|  | AZOBR_p340217 | Horizontally Transferred (high confidence)   |
|  | AZOBR_p340218 | Horizontally Transferred (high confidence)   |
|  | AZOBR_p340219 | Horizontally Transferred (high confidence)   |
|  | AZOBR_p340220 | Horizontally Transferred (high confidence)   |
|  | AZOBR_p340221 | Ancestral (medium confidence)                |
|  | AZOBR_p340222 | Unassigned                                   |
|  | AZOBR_p350001 | Ancestral (high confidence)                  |
|  | AZOBR_p350002 | Horizontally Transferred (high confidence)   |
|  | AZOBR_p350003 | Horizontally Transferred (high confidence)   |
|  | AZOBR_p350004 | Horizontally Transferred (high confidence)   |
|  | AZOBR_p350005 | Horizontally Transferred (high confidence)   |
|  | AZOBR_p350006 | Horizontally Transferred (high confidence)   |
|  | AZOBR_p350007 | Ancestral (low confidence)                   |
|  | AZOBR_p350008 | Horizontally Transferred (high confidence)   |
|  | AZOBR_p350009 | Unassigned                                   |
|  | AZOBR_p350010 | Horizontally Transferred (high confidence)   |
|  | AZOBR_p350011 | Horizontally Transferred (high confidence)   |
|  | AZOBR_p350012 | Horizontally Transferred (high confidence)   |
|  | AZOBR_p350013 | Horizontally Transferred (high confidence)   |
|  | AZOBR_p350014 | Ancestral (low confidence)                   |
|  | AZOBR_p350015 | Horizontally Transferred (high confidence)   |
|  | AZOBR_p350016 | Ancestral (low confidence)                   |
|  | AZOBR_p350017 | Unassigned                                   |
|  | AZOBR_p350018 | Ancestral (low confidence)                   |
|  | AZOBR_p350019 | Unassigned                                   |
|  | AZOBR_p350020 | Unassigned                                   |
|  | AZOBR_p350021 | Unassigned                                   |
|  | AZOBR_p350022 | Unassigned                                   |
|  | AZOBR_p350023 | Horizontally Transferred (high confidence)   |
|  | AZOBR_p350024 | Ancestral (medium confidence)                |
|  | AZOBR_p350025 | Horizontally Transferred (high confidence)   |
|  | AZOBR_p350026 | Horizontally Transferred (high confidence)   |
|  | AZOBR_p350027 | Ancestral (high confidence)                  |
|  | AZOBR_p350028 | Ancestral (high confidence)                  |
|  | AZOBR_p350029 | Ancestral (medium confidence)                |
|  | AZOBR_p350030 | Ancestral (low confidence)                   |
|  | AZOBR_p350031 | Unassigned                                   |
|  | AZOBR_p350032 | Horizontally Transferred (medium confidence) |
|  | AZOBR_p350033 | Unassigned                                   |
|  | AZOBR_p350034 | Ancestral (medium confidence)                |
|  | AZOBR_p350035 | Ancestral (medium confidence)                |
|  | AZOBR_p350036 | Ancestral (low confidence)                   |
|  | AZOBR_p350037 | Ancestral (low confidence)                   |
|  | AZOBR_p350038 | Horizontally Transferred (high confidence)   |
|  | AZOBR_p350039 | Horizontally Transferred (high confidence)   |
|  | AZOBR_p350040 | Ancestral (low confidence)                   |
|  | AZOBR_p350041 | Horizontally Transferred (high confidence)   |
|  | AZOBR_p350042 | Horizontally Transferred (high confidence)   |
|  | AZOBR_p350043 | Ancestral (low confidence)                   |
|  | AZOBR_p350044 | Horizontally Transferred (high confidence)   |
|  | AZOBR_p350045 | Unassigned                                   |
|  | AZOBR_p350046 | Horizontally Transferred (high confidence)   |
|  | AZOBR_p350047 | Horizontally Transferred (high confidence)   |

|  |               |                                              |
|--|---------------|----------------------------------------------|
|  | AZOBR_p350048 | Horizontally Transferred (high confidence)   |
|  | AZOBR_p350049 | Horizontally Transferred (medium confidence) |
|  | AZOBR_p350050 | Ancestral (medium confidence)                |
|  | AZOBR_p350051 | Ancestral (low confidence)                   |
|  | AZOBR_p350052 | Horizontally Transferred (medium confidence) |
|  | AZOBR_p350053 | Horizontally Transferred (high confidence)   |
|  | AZOBR_p350054 | Horizontally Transferred (high confidence)   |
|  | AZOBR_p350055 | Horizontally Transferred (high confidence)   |
|  | AZOBR_p350056 | Unassigned                                   |
|  | AZOBR_p350057 | Horizontally Transferred (high confidence)   |
|  | AZOBR_p350058 | Horizontally Transferred (high confidence)   |
|  | AZOBR_p350059 | Horizontally Transferred (low confidence)    |
|  | AZOBR_p350060 | Unassigned                                   |
|  | AZOBR_p350061 | Horizontally Transferred (high confidence)   |
|  | AZOBR_p350062 | Ancestral (medium confidence)                |
|  | AZOBR_p350063 | Ancestral (high confidence)                  |
|  | AZOBR_p350064 | Unassigned                                   |
|  | AZOBR_p350065 | Horizontally Transferred (high confidence)   |
|  | AZOBR_p350066 | Ancestral (low confidence)                   |
|  | AZOBR_p350067 | Ancestral (low confidence)                   |
|  | AZOBR_p350068 | Horizontally Transferred (high confidence)   |
|  | AZOBR_p350069 | Horizontally Transferred (high confidence)   |
|  | AZOBR_p350070 | Horizontally Transferred (high confidence)   |
|  | AZOBR_p350071 | Unassigned                                   |
|  | AZOBR_p350072 | Unassigned                                   |
|  | AZOBR_p350073 | Horizontally Transferred (high confidence)   |
|  | AZOBR_p350074 | Horizontally Transferred (high confidence)   |
|  | AZOBR_p350075 | Horizontally Transferred (high confidence)   |
|  | AZOBR_p350076 | Horizontally Transferred (high confidence)   |
|  | AZOBR_p350077 | Horizontally Transferred (high confidence)   |
|  | AZOBR_p350078 | Horizontally Transferred (high confidence)   |
|  | AZOBR_p350079 | Horizontally Transferred (high confidence)   |
|  | AZOBR_p350080 | Horizontally Transferred (high confidence)   |
|  | AZOBR_p350081 | Unassigned                                   |
|  | AZOBR_p350082 | Unassigned                                   |
|  | AZOBR_p350083 | Horizontally Transferred (high confidence)   |
|  | AZOBR_p350084 | Horizontally Transferred (high confidence)   |
|  | AZOBR_p350085 | Ancestral (low confidence)                   |
|  | AZOBR_p350086 | Unassigned                                   |
|  | AZOBR_p350087 | Unassigned                                   |
|  | AZOBR_p350088 | Unassigned                                   |
|  | AZOBR_p350089 | Unassigned                                   |
|  | AZOBR_p350090 | Unassigned                                   |
|  | AZOBR_p350091 | Horizontally Transferred (high confidence)   |
|  | AZOBR_p360001 | Ancestral (low confidence)                   |
|  | AZOBR_p360002 | Unassigned                                   |
|  | AZOBR_p360003 | Horizontally Transferred (high confidence)   |
|  | AZOBR_p360004 | Ancestral (low confidence)                   |
|  | AZOBR_p360005 | Horizontally Transferred (high confidence)   |
|  | AZOBR_p360006 | Horizontally Transferred (high confidence)   |
|  | AZOBR_p360007 | Ancestral (low confidence)                   |
|  | AZOBR_p410001 | Horizontally Transferred (high confidence)   |
|  | AZOBR_p410002 | Unassigned                                   |
|  | AZOBR_p410003 | Unassigned                                   |
|  | AZOBR_p410004 | Ancestral (low confidence)                   |
|  | AZOBR_p410005 | Ancestral (low confidence)                   |
|  | AZOBR_p410006 | Horizontally Transferred (low confidence)    |
|  | AZOBR_p410007 | Horizontally Transferred (high confidence)   |
|  | AZOBR_p410008 | Horizontally Transferred (high confidence)   |
|  | AZOBR_p410009 | Horizontally Transferred (high confidence)   |
|  | AZOBR_p410010 | Horizontally Transferred (high confidence)   |
|  | AZOBR_p410011 | Horizontally Transferred (high confidence)   |
|  | AZOBR_p410012 | Horizontally Transferred (high confidence)   |
|  | AZOBR_p410013 | Horizontally Transferred (high confidence)   |
|  | AZOBR_p410014 | Horizontally Transferred (medium confidence) |
|  | AZOBR_p410015 | Horizontally Transferred (medium confidence) |
|  | AZOBR_p410016 | Horizontally Transferred (medium confidence) |
|  | AZOBR_p410017 | Horizontally Transferred (high confidence)   |
|  | AZOBR_p410018 | Horizontally Transferred (high confidence)   |
|  | AZOBR_p410019 | Horizontally Transferred (high confidence)   |
|  | AZOBR_p410020 | Horizontally Transferred (high confidence)   |
|  | AZOBR_p410021 | Ancestral (medium confidence)                |
|  | AZOBR_p410022 | Ancestral (high confidence)                  |
|  | AZOBR_p410023 | Ancestral (medium confidence)                |
|  | AZOBR_p410024 | Ancestral (low confidence)                   |

|  |               |                                              |
|--|---------------|----------------------------------------------|
|  | AZOBR_p410025 | Horizontally Transferred (medium confidence) |
|  | AZOBR_p410026 | Horizontally Transferred (high confidence)   |
|  | AZOBR_p410027 | Horizontally Transferred (high confidence)   |
|  | AZOBR_p410028 | Unassigned                                   |
|  | AZOBR_p410029 | Ancestral (low confidence)                   |
|  | AZOBR_p410030 | Unassigned                                   |
|  | AZOBR_p410031 | Ancestral (medium confidence)                |
|  | AZOBR_p410032 | Ancestral (medium confidence)                |
|  | AZOBR_p410033 | Ancestral (medium confidence)                |
|  | AZOBR_p410034 | Horizontally Transferred (high confidence)   |
|  | AZOBR_p410035 | Horizontally Transferred (high confidence)   |
|  | AZOBR_p410036 | Ancestral (low confidence)                   |
|  | AZOBR_p410037 | Unassigned                                   |
|  | AZOBR_p410038 | Ancestral (medium confidence)                |
|  | AZOBR_p410039 | Unassigned                                   |
|  | AZOBR_p410040 | Ancestral (medium confidence)                |
|  | AZOBR_p410041 | Horizontally Transferred (high confidence)   |
|  | AZOBR_p410042 | Ancestral (low confidence)                   |
|  | AZOBR_p410043 | Ancestral (low confidence)                   |
|  | AZOBR_p410044 | Ancestral (low confidence)                   |
|  | AZOBR_p410045 | Horizontally Transferred (high confidence)   |
|  | AZOBR_p410046 | Ancestral (medium confidence)                |
|  | AZOBR_p410047 | Ancestral (low confidence)                   |
|  | AZOBR_p410048 | Horizontally Transferred (high confidence)   |
|  | AZOBR_p410049 | Horizontally Transferred (high confidence)   |
|  | AZOBR_p410050 | Horizontally Transferred (high confidence)   |
|  | AZOBR_p410051 | Horizontally Transferred (high confidence)   |
|  | AZOBR_p410052 | Horizontally Transferred (medium confidence) |
|  | AZOBR_p410053 | Horizontally Transferred (high confidence)   |
|  | AZOBR_p410054 | Unassigned                                   |
|  | AZOBR_p410055 | Ancestral (medium confidence)                |
|  | AZOBR_p410056 | Horizontally Transferred (high confidence)   |
|  | AZOBR_p410057 | Ancestral (medium confidence)                |
|  | AZOBR_p410058 | Ancestral (medium confidence)                |
|  | AZOBR_p410059 | Ancestral (medium confidence)                |
|  | AZOBR_p410060 | Horizontally Transferred (medium confidence) |
|  | AZOBR_p410061 | Ancestral (high confidence)                  |
|  | AZOBR_p410062 | Ancestral (low confidence)                   |
|  | AZOBR_p410063 | Ancestral (low confidence)                   |
|  | AZOBR_p410064 | Ancestral (high confidence)                  |
|  | AZOBR_p410065 | Ancestral (high confidence)                  |
|  | AZOBR_p410066 | Ancestral (medium confidence)                |
|  | AZOBR_p410067 | Ancestral (medium confidence)                |
|  | AZOBR_p410068 | Ancestral (medium confidence)                |
|  | AZOBR_p410069 | Ancestral (low confidence)                   |
|  | AZOBR_p410070 | Ancestral (high confidence)                  |
|  | AZOBR_p410071 | Ancestral (high confidence)                  |
|  | AZOBR_p410072 | Ancestral (medium confidence)                |
|  | AZOBR_p410073 | Ancestral (medium confidence)                |
|  | AZOBR_p410074 | Horizontally Transferred (high confidence)   |
|  | AZOBR_p410075 | Horizontally Transferred (high confidence)   |
|  | AZOBR_p410076 | Horizontally Transferred (medium confidence) |
|  | AZOBR_p410077 | Horizontally Transferred (high confidence)   |
|  | AZOBR_p410078 | Horizontally Transferred (high confidence)   |
|  | AZOBR_p410079 | Unassigned                                   |
|  | AZOBR_p410080 | Unassigned                                   |
|  | AZOBR_p410081 | Ancestral (low confidence)                   |
|  | AZOBR_p410082 | Unassigned                                   |
|  | AZOBR_p410083 | Horizontally Transferred (medium confidence) |
|  | AZOBR_p410084 | Horizontally Transferred (medium confidence) |
|  | AZOBR_p410085 | Ancestral (medium confidence)                |
|  | AZOBR_p410086 | Horizontally Transferred (high confidence)   |
|  | AZOBR_p410087 | Ancestral (low confidence)                   |
|  | AZOBR_p410088 | Horizontally Transferred (high confidence)   |
|  | AZOBR_p410089 | Horizontally Transferred (high confidence)   |
|  | AZOBR_p410090 | Unassigned                                   |
|  | AZOBR_p410091 | Ancestral (medium confidence)                |
|  | AZOBR_p410092 | Horizontally Transferred (high confidence)   |
|  | AZOBR_p410093 | Ancestral (high confidence)                  |
|  | AZOBR_p410094 | Ancestral (low confidence)                   |
|  | AZOBR_p410095 | Ancestral (low confidence)                   |
|  | AZOBR_p410096 | Ancestral (low confidence)                   |
|  | AZOBR_p410097 | Ancestral (low confidence)                   |
|  | AZOBR_p410098 | Ancestral (medium confidence)                |
|  | AZOBR_p410099 | Unassigned                                   |

|  |               |                                              |
|--|---------------|----------------------------------------------|
|  | AZOBR_p410100 | Horizontally Transferred (high confidence)   |
|  | AZOBR_p410101 | Unassigned                                   |
|  | AZOBR_p410102 | Horizontally Transferred (medium confidence) |
|  | AZOBR_p410103 | Horizontally Transferred (high confidence)   |
|  | AZOBR_p410104 | Unassigned                                   |
|  | AZOBR_p410105 | Horizontally Transferred (high confidence)   |
|  | AZOBR_p410106 | Horizontally Transferred (medium confidence) |
|  | AZOBR_p420001 | Ancestral (medium confidence)                |
|  | AZOBR_p420002 | Horizontally Transferred (high confidence)   |
|  | AZOBR_p420003 | Ancestral (low confidence)                   |
|  | AZOBR_p420004 | Horizontally Transferred (high confidence)   |
|  | AZOBR_p420005 | Horizontally Transferred (high confidence)   |
|  | AZOBR_p420006 | Horizontally Transferred (high confidence)   |
|  | AZOBR_p420007 | Unassigned                                   |
|  | AZOBR_p420008 | Unassigned                                   |
|  | AZOBR_p420009 | Horizontally Transferred (high confidence)   |
|  | AZOBR_p420010 | Ancestral (high confidence)                  |
|  | AZOBR_p420011 | Horizontally Transferred (high confidence)   |
|  | AZOBR_p420012 | Horizontally Transferred (high confidence)   |
|  | AZOBR_p420013 | Ancestral (high confidence)                  |
|  | AZOBR_p420014 | Unassigned                                   |
|  | AZOBR_p420015 | Horizontally Transferred (high confidence)   |
|  | AZOBR_p420016 | Ancestral (medium confidence)                |
|  | AZOBR_p420017 | Ancestral (medium confidence)                |
|  | AZOBR_p420018 | Ancestral (low confidence)                   |
|  | AZOBR_p420019 | Horizontally Transferred (high confidence)   |
|  | AZOBR_p420020 | Ancestral (medium confidence)                |
|  | AZOBR_p420021 | Ancestral (low confidence)                   |
|  | AZOBR_p420022 | Unassigned                                   |
|  | AZOBR_p420023 | Horizontally Transferred (high confidence)   |
|  | AZOBR_p420024 | Ancestral (high confidence)                  |
|  | AZOBR_p420025 | Ancestral (medium confidence)                |
|  | AZOBR_p420026 | Ancestral (high confidence)                  |
|  | AZOBR_p420027 | Horizontally Transferred (high confidence)   |
|  | AZOBR_p420028 | Horizontally Transferred (high confidence)   |
|  | AZOBR_p420029 | Horizontally Transferred (high confidence)   |
|  | AZOBR_p420030 | Horizontally Transferred (high confidence)   |
|  | AZOBR_p420031 | Horizontally Transferred (high confidence)   |
|  | AZOBR_p420032 | Horizontally Transferred (high confidence)   |
|  | AZOBR_p420033 | Ancestral (low confidence)                   |
|  | AZOBR_p430001 | Unassigned                                   |
|  | AZOBR_p430002 | Unassigned                                   |
|  | AZOBR_p430003 | Ancestral (low confidence)                   |
|  | AZOBR_p430004 | Horizontally Transferred (high confidence)   |
|  | AZOBR_p430005 | Horizontally Transferred (high confidence)   |
|  | AZOBR_p430006 | Horizontally Transferred (high confidence)   |
|  | AZOBR_p430007 | Horizontally Transferred (high confidence)   |
|  | AZOBR_p430008 | Horizontally Transferred (high confidence)   |
|  | AZOBR_p430009 | Ancestral (low confidence)                   |
|  | AZOBR_p430010 | Ancestral (low confidence)                   |
|  | AZOBR_p430011 | Horizontally Transferred (medium confidence) |
|  | AZOBR_p430012 | Horizontally Transferred (high confidence)   |
|  | AZOBR_p430013 | Horizontally Transferred (high confidence)   |
|  | AZOBR_p430014 | Unassigned                                   |
|  | AZOBR_p430015 | Unassigned                                   |
|  | AZOBR_p430016 | Unassigned                                   |
|  | AZOBR_p430017 | Unassigned                                   |
|  | AZOBR_p430018 | Unassigned                                   |
|  | AZOBR_p430019 | Unassigned                                   |
|  | AZOBR_p430020 | Unassigned                                   |
|  | AZOBR_p430021 | Horizontally Transferred (low confidence)    |
|  | AZOBR_p430022 | Horizontally Transferred (low confidence)    |
|  | AZOBR_p430023 | Unassigned                                   |
|  | AZOBR_p430024 | Unassigned                                   |
|  | AZOBR_p430025 | Ancestral (high confidence)                  |
|  | AZOBR_p430026 | Unassigned                                   |
|  | AZOBR_p430027 | Unassigned                                   |
|  | AZOBR_p430028 | Ancestral (low confidence)                   |
|  | AZOBR_p430029 | Horizontally Transferred (high confidence)   |
|  | AZOBR_p430030 | Horizontally Transferred (high confidence)   |
|  | AZOBR_p430031 | Horizontally Transferred (high confidence)   |
|  | AZOBR_p430032 | Horizontally Transferred (low confidence)    |
|  | AZOBR_p430033 | Horizontally Transferred (medium confidence) |
|  | AZOBR_p430034 | Unassigned                                   |
|  | AZOBR_p430035 | Horizontally Transferred (high confidence)   |

|  |               |                                              |
|--|---------------|----------------------------------------------|
|  | AZOBR_p430036 | Horizontally Transferred (high confidence)   |
|  | AZOBR_p430037 | Horizontally Transferred (high confidence)   |
|  | AZOBR_p430038 | Ancestral (medium confidence)                |
|  | AZOBR_p430039 | Ancestral (low confidence)                   |
|  | AZOBR_p430040 | Ancestral (low confidence)                   |
|  | AZOBR_p430041 | Horizontally Transferred (high confidence)   |
|  | AZOBR_p430042 | Ancestral (low confidence)                   |
|  | AZOBR_p430043 | Ancestral (low confidence)                   |
|  | AZOBR_p430044 | Horizontally Transferred (high confidence)   |
|  | AZOBR_p430045 | Horizontally Transferred (high confidence)   |
|  | AZOBR_p430046 | Horizontally Transferred (high confidence)   |
|  | AZOBR_p430047 | Horizontally Transferred (high confidence)   |
|  | AZOBR_p430048 | Unassigned                                   |
|  | AZOBR_p430049 | Horizontally Transferred (medium confidence) |
|  | AZOBR_p430050 | Ancestral (high confidence)                  |
|  | AZOBR_p430051 | Ancestral (high confidence)                  |
|  | AZOBR_p430052 | Unassigned                                   |
|  | AZOBR_p430053 | Ancestral (high confidence)                  |
|  | AZOBR_p430054 | Ancestral (high confidence)                  |
|  | AZOBR_p430055 | Ancestral (high confidence)                  |
|  | AZOBR_p430056 | Horizontally Transferred (high confidence)   |
|  | AZOBR_p430057 | Ancestral (high confidence)                  |
|  | AZOBR_p430058 | Ancestral (high confidence)                  |
|  | AZOBR_p430059 | Unassigned                                   |
|  | AZOBR_p430060 | Ancestral (high confidence)                  |
|  | AZOBR_p430061 | Unassigned                                   |
|  | AZOBR_p430062 | Ancestral (medium confidence)                |
|  | AZOBR_p430063 | Ancestral (high confidence)                  |
|  | AZOBR_p430064 | Ancestral (medium confidence)                |
|  | AZOBR_p430065 | Unassigned                                   |
|  | AZOBR_p430066 | Ancestral (high confidence)                  |
|  | AZOBR_p440001 | Ancestral (medium confidence)                |
|  | AZOBR_p440002 | Ancestral (medium confidence)                |
|  | AZOBR_p440003 | Unassigned                                   |
|  | AZOBR_p440004 | Ancestral (medium confidence)                |
|  | AZOBR_p440005 | Ancestral (low confidence)                   |
|  | AZOBR_p440006 | Horizontally Transferred (high confidence)   |
|  | AZOBR_p440007 | Ancestral (low confidence)                   |
|  | AZOBR_p440008 | Ancestral (low confidence)                   |
|  | AZOBR_p440009 | Horizontally Transferred (high confidence)   |
|  | AZOBR_p440010 | Horizontally Transferred (high confidence)   |
|  | AZOBR_p440011 | Unassigned                                   |
|  | AZOBR_p440012 | Horizontally Transferred (high confidence)   |
|  | AZOBR_p440013 | Horizontally Transferred (high confidence)   |
|  | AZOBR_p440014 | Ancestral (high confidence)                  |
|  | AZOBR_p440015 | Ancestral (medium confidence)                |
|  | AZOBR_p440016 | Ancestral (high confidence)                  |
|  | AZOBR_p440017 | Unassigned                                   |
|  | AZOBR_p440018 | Ancestral (medium confidence)                |
|  | AZOBR_p440019 | Ancestral (medium confidence)                |
|  | AZOBR_p440020 | Unassigned                                   |
|  | AZOBR_p440021 | Horizontally Transferred (high confidence)   |
|  | AZOBR_p440022 | Horizontally Transferred (high confidence)   |
|  | AZOBR_p440023 | Horizontally Transferred (high confidence)   |
|  | AZOBR_p440024 | Ancestral (low confidence)                   |
|  | AZOBR_p440025 | Unassigned                                   |
|  | AZOBR_p440026 | Ancestral (high confidence)                  |
|  | AZOBR_p440027 | Horizontally Transferred (high confidence)   |
|  | AZOBR_p440028 | Ancestral (low confidence)                   |
|  | AZOBR_p440029 | Horizontally Transferred (high confidence)   |
|  | AZOBR_p440030 | Ancestral (low confidence)                   |
|  | AZOBR_p440031 | Horizontally Transferred (high confidence)   |
|  | AZOBR_p440032 | Horizontally Transferred (high confidence)   |
|  | AZOBR_p440033 | Ancestral (low confidence)                   |
|  | AZOBR_p440034 | Ancestral (high confidence)                  |
|  | AZOBR_p440035 | Horizontally Transferred (high confidence)   |
|  | AZOBR_p440036 | Ancestral (low confidence)                   |
|  | AZOBR_p440037 | Unassigned                                   |
|  | AZOBR_p440038 | Unassigned                                   |
|  | AZOBR_p440039 | Unassigned                                   |
|  | AZOBR_p440040 | Unassigned                                   |
|  | AZOBR_p440041 | Ancestral (medium confidence)                |
|  | AZOBR_p440042 | Ancestral (high confidence)                  |
|  | AZOBR_p440043 | Ancestral (high confidence)                  |
|  | AZOBR_p440044 | Ancestral (high confidence)                  |

|  |               |                                              |
|--|---------------|----------------------------------------------|
|  | AZOBR_p440045 | Ancestral (low confidence)                   |
|  | AZOBR_p440046 | Horizontally Transferred (high confidence)   |
|  | AZOBR_p440047 | Horizontally Transferred (high confidence)   |
|  | AZOBR_p440048 | Horizontally Transferred (high confidence)   |
|  | AZOBR_p440049 | Horizontally Transferred (high confidence)   |
|  | AZOBR_p440050 | Ancestral (low confidence)                   |
|  | AZOBR_p440051 | Ancestral (high confidence)                  |
|  | AZOBR_p440052 | Horizontally Transferred (high confidence)   |
|  | AZOBR_p440053 | Ancestral (medium confidence)                |
|  | AZOBR_p440054 | Ancestral (low confidence)                   |
|  | AZOBR_p440055 | Ancestral (low confidence)                   |
|  | AZOBR_p440056 | Ancestral (low confidence)                   |
|  | AZOBR_p440057 | Ancestral (low confidence)                   |
|  | AZOBR_p440058 | Horizontally Transferred (high confidence)   |
|  | AZOBR_p440059 | Horizontally Transferred (high confidence)   |
|  | AZOBR_p440060 | Horizontally Transferred (high confidence)   |
|  | AZOBR_p440061 | Horizontally Transferred (high confidence)   |
|  | AZOBR_p440062 | Horizontally Transferred (low confidence)    |
|  | AZOBR_p440063 | Horizontally Transferred (high confidence)   |
|  | AZOBR_p440064 | Ancestral (low confidence)                   |
|  | AZOBR_p440065 | Ancestral (low confidence)                   |
|  | AZOBR_p440066 | Unassigned                                   |
|  | AZOBR_p440067 | Ancestral (medium confidence)                |
|  | AZOBR_p440068 | Horizontally Transferred (high confidence)   |
|  | AZOBR_p440069 | Horizontally Transferred (medium confidence) |
|  | AZOBR_p440070 | Horizontally Transferred (high confidence)   |
|  | AZOBR_p440071 | Horizontally Transferred (low confidence)    |
|  | AZOBR_p440072 | Horizontally Transferred (high confidence)   |
|  | AZOBR_p440073 | Horizontally Transferred (low confidence)    |
|  | AZOBR_p440074 | Horizontally Transferred (high confidence)   |
|  | AZOBR_p440075 | Horizontally Transferred (high confidence)   |
|  | AZOBR_p440076 | Ancestral (high confidence)                  |
|  | AZOBR_p440077 | Unassigned                                   |
|  | AZOBR_p440078 | Unassigned                                   |
|  | AZOBR_p440079 | Ancestral (medium confidence)                |
|  | AZOBR_p440080 | Unassigned                                   |
|  | AZOBR_p440081 | Unassigned                                   |
|  | AZOBR_p440082 | Horizontally Transferred (high confidence)   |
|  | AZOBR_p440083 | Horizontally Transferred (low confidence)    |
|  | AZOBR_p440084 | Unassigned                                   |
|  | AZOBR_p440085 | Ancestral (low confidence)                   |
|  | AZOBR_p440086 | Horizontally Transferred (high confidence)   |
|  | AZOBR_p440087 | Unassigned                                   |
|  | AZOBR_p440088 | Unassigned                                   |
|  | AZOBR_p440089 | Horizontally Transferred (high confidence)   |
|  | AZOBR_p440090 | Horizontally Transferred (high confidence)   |
|  | AZOBR_p440091 | Horizontally Transferred (medium confidence) |
|  | AZOBR_p440092 | Ancestral (medium confidence)                |
|  | AZOBR_p440093 | Ancestral (medium confidence)                |
|  | AZOBR_p440094 | Ancestral (high confidence)                  |
|  | AZOBR_p440095 | Ancestral (medium confidence)                |
|  | AZOBR_p440096 | Horizontally Transferred (high confidence)   |
|  | AZOBR_p440097 | Ancestral (low confidence)                   |
|  | AZOBR_p440098 | Unassigned                                   |
|  | AZOBR_p440099 | Ancestral (low confidence)                   |
|  | AZOBR_p440100 | Ancestral (low confidence)                   |
|  | AZOBR_p440101 | Horizontally Transferred (high confidence)   |
|  | AZOBR_p440102 | Ancestral (medium confidence)                |
|  | AZOBR_p440103 | Ancestral (medium confidence)                |
|  | AZOBR_p440104 | Unassigned                                   |
|  | AZOBR_p440105 | Ancestral (low confidence)                   |
|  | AZOBR_p440106 | Unassigned                                   |
|  | AZOBR_p440107 | Ancestral (high confidence)                  |
|  | AZOBR_p440108 | Ancestral (medium confidence)                |
|  | AZOBR_p440109 | Unassigned                                   |
|  | AZOBR_p440110 | Ancestral (high confidence)                  |
|  | AZOBR_p440111 | Ancestral (medium confidence)                |
|  | AZOBR_p440112 | Ancestral (low confidence)                   |
|  | AZOBR_p440113 | Horizontally Transferred (medium confidence) |
|  | AZOBR_p440114 | Horizontally Transferred (medium confidence) |
|  | AZOBR_p440115 | Ancestral (low confidence)                   |
|  | AZOBR_p440116 | Ancestral (low confidence)                   |
|  | AZOBR_p440117 | Ancestral (low confidence)                   |
|  | AZOBR_p440118 | Ancestral (low confidence)                   |
|  | AZOBR_p440119 | Horizontally Transferred (high confidence)   |



|  |               |                                              |
|--|---------------|----------------------------------------------|
|  | AZOBR_p440120 | Ancestral (low confidence)                   |
|  | AZOBR_p440121 | Unassigned                                   |
|  | AZOBR_p440122 | Ancestral (low confidence)                   |
|  | AZOBR_p440123 | Ancestral (medium confidence)                |
|  | AZOBR_p440124 | Horizontally Transferred (high confidence)   |
|  | AZOBR_p440125 | Unassigned                                   |
|  | AZOBR_p440126 | Horizontally Transferred (high confidence)   |
|  | AZOBR_p440127 | Ancestral (medium confidence)                |
|  | AZOBR_p440128 | Ancestral (medium confidence)                |
|  | AZOBR_p440129 | Ancestral (low confidence)                   |
|  | AZOBR_p440130 | Ancestral (low confidence)                   |
|  | AZOBR_p440131 | Ancestral (high confidence)                  |
|  | AZOBR_p440132 | Horizontally Transferred (high confidence)   |
|  | AZOBR_p440133 | Ancestral (low confidence)                   |
|  | AZOBR_p440134 | Ancestral (low confidence)                   |
|  | AZOBR_p440135 | Ancestral (low confidence)                   |
|  | AZOBR_p440136 | Horizontally Transferred (medium confidence) |
|  | AZOBR_p440137 | Ancestral (low confidence)                   |
|  | AZOBR_p440138 | Ancestral (low confidence)                   |
|  | AZOBR_p440139 | Horizontally Transferred (high confidence)   |
|  | AZOBR_p440140 | Horizontally Transferred (high confidence)   |
|  | AZOBR_p440141 | Ancestral (high confidence)                  |
|  | AZOBR_p440142 | Horizontally Transferred (high confidence)   |
|  | AZOBR_p440143 | Ancestral (low confidence)                   |
|  | AZOBR_p440144 | Ancestral (high confidence)                  |
|  | AZOBR_p440145 | Ancestral (medium confidence)                |
|  | AZOBR_p440146 | Ancestral (high confidence)                  |
|  | AZOBR_p440147 | Ancestral (high confidence)                  |
|  | AZOBR_p440148 | Ancestral (medium confidence)                |
|  | AZOBR_p440149 | Ancestral (high confidence)                  |
|  | AZOBR_p440150 | Unassigned                                   |
|  | AZOBR_p440151 | Ancestral (medium confidence)                |
|  | AZOBR_p440152 | Ancestral (high confidence)                  |
|  | AZOBR_p440153 | Ancestral (medium confidence)                |
|  | AZOBR_p440154 | Ancestral (medium confidence)                |
|  | AZOBR_p440155 | Horizontally Transferred (high confidence)   |
|  | AZOBR_p440156 | Horizontally Transferred (high confidence)   |
|  | AZOBR_p440157 | Horizontally Transferred (high confidence)   |
|  | AZOBR_p440158 | Horizontally Transferred (high confidence)   |
|  | AZOBR_p440159 | Horizontally Transferred (high confidence)   |
|  | AZOBR_p440160 | Horizontally Transferred (high confidence)   |
|  | AZOBR_p440161 | Ancestral (low confidence)                   |
|  | AZOBR_p440162 | Horizontally Transferred (high confidence)   |
|  | AZOBR_p440163 | Horizontally Transferred (high confidence)   |
|  | AZOBR_p440164 | Horizontally Transferred (high confidence)   |
|  | AZOBR_p440165 | Horizontally Transferred (high confidence)   |
|  | AZOBR_p440166 | Horizontally Transferred (high confidence)   |
|  | AZOBR_p440167 | Horizontally Transferred (high confidence)   |
|  | AZOBR_p440168 | Horizontally Transferred (high confidence)   |
|  | AZOBR_p440169 | Horizontally Transferred (high confidence)   |
|  | AZOBR_p440170 | Horizontally Transferred (high confidence)   |
|  | AZOBR_p440171 | Horizontally Transferred (high confidence)   |
|  | AZOBR_p440172 | Horizontally Transferred (high confidence)   |
|  | AZOBR_p440173 | Horizontally Transferred (high confidence)   |
|  | AZOBR_p440174 | Unassigned                                   |
|  | AZOBR_p440175 | Ancestral (low confidence)                   |
|  | AZOBR_p440176 | Unassigned                                   |
|  | AZOBR_p440177 | Horizontally Transferred (high confidence)   |
|  | AZOBR_p440178 | Horizontally Transferred (high confidence)   |
|  | AZOBR_p440179 | Horizontally Transferred (high confidence)   |
|  | AZOBR_p440180 | Horizontally Transferred (high confidence)   |
|  | AZOBR_p440181 | Unassigned                                   |
|  | AZOBR_p440182 | Horizontally Transferred (high confidence)   |
|  | AZOBR_p440183 | Horizontally Transferred (medium confidence) |
|  | AZOBR_p440184 | Ancestral (medium confidence)                |
|  | AZOBR_p440185 | Horizontally Transferred (high confidence)   |
|  | AZOBR_p440186 | Unassigned                                   |
|  | AZOBR_p440187 | Horizontally Transferred (high confidence)   |
|  | AZOBR_p440188 | Unassigned                                   |
|  | AZOBR_p450001 | Unassigned                                   |
|  | AZOBR_p450002 | Unassigned                                   |
|  | AZOBR_p450003 | Unassigned                                   |
|  | AZOBR_p450004 | Horizontally Transferred (high confidence)   |
|  | AZOBR_p450005 | Ancestral (low confidence)                   |
|  | AZOBR_p450006 | Horizontally Transferred (high confidence)   |

|  |               |                                              |
|--|---------------|----------------------------------------------|
|  | AZOBR_p450007 | Unassigned                                   |
|  | AZOBR_p450008 | Unassigned                                   |
|  | AZOBR_p450009 | Horizontally Transferred (high confidence)   |
|  | AZOBR_p450010 | Horizontally Transferred (high confidence)   |
|  | AZOBR_p450011 | Horizontally Transferred (high confidence)   |
|  | AZOBR_p450012 | Horizontally Transferred (high confidence)   |
|  | AZOBR_p450013 | Horizontally Transferred (high confidence)   |
|  | AZOBR_p450014 | Horizontally Transferred (high confidence)   |
|  | AZOBR_p460001 | Horizontally Transferred (high confidence)   |
|  | AZOBR_p460002 | Horizontally Transferred (high confidence)   |
|  | AZOBR_p460003 | Ancestral (medium confidence)                |
|  | AZOBR_p460004 | Unassigned                                   |
|  | AZOBR_p460005 | Horizontally Transferred (high confidence)   |
|  | AZOBR_p460006 | Unassigned                                   |
|  | AZOBR_p460007 | Unassigned                                   |
|  | AZOBR_p460008 | Ancestral (low confidence)                   |
|  | AZOBR_p460009 | Unassigned                                   |
|  | AZOBR_p460010 | Horizontally Transferred (high confidence)   |
|  | AZOBR_p460011 | Horizontally Transferred (high confidence)   |
|  | AZOBR_p460012 | Horizontally Transferred (high confidence)   |
|  | AZOBR_p460013 | Horizontally Transferred (high confidence)   |
|  | AZOBR_p460014 | Horizontally Transferred (high confidence)   |
|  | AZOBR_p460015 | Ancestral (low confidence)                   |
|  | AZOBR_p460016 | Ancestral (medium confidence)                |
|  | AZOBR_p460017 | Horizontally Transferred (high confidence)   |
|  | AZOBR_p460018 | Unassigned                                   |
|  | AZOBR_p460019 | Unassigned                                   |
|  | AZOBR_p460020 | Unassigned                                   |
|  | AZOBR_p460021 | Unassigned                                   |
|  | AZOBR_p460022 | Unassigned                                   |
|  | AZOBR_p460023 | Horizontally Transferred (high confidence)   |
|  | AZOBR_p460024 | Ancestral (low confidence)                   |
|  | AZOBR_p460025 | Horizontally Transferred (high confidence)   |
|  | AZOBR_p460026 | Horizontally Transferred (high confidence)   |
|  | AZOBR_p460027 | Horizontally Transferred (high confidence)   |
|  | AZOBR_p460028 | Horizontally Transferred (high confidence)   |
|  | AZOBR_p460029 | Horizontally Transferred (high confidence)   |
|  | AZOBR_p460030 | Horizontally Transferred (high confidence)   |
|  | AZOBR_p460031 | Horizontally Transferred (medium confidence) |
|  | AZOBR_p460032 | Unassigned                                   |
|  | AZOBR_p460033 | Horizontally Transferred (high confidence)   |
|  | AZOBR_p460034 | Horizontally Transferred (high confidence)   |
|  | AZOBR_p460035 | Horizontally Transferred (high confidence)   |
|  | AZOBR_p460036 | Horizontally Transferred (high confidence)   |
|  | AZOBR_p460037 | Ancestral (low confidence)                   |
|  | AZOBR_p460038 | Ancestral (low confidence)                   |
|  | AZOBR_p460039 | Ancestral (low confidence)                   |
|  | AZOBR_p460040 | Horizontally Transferred (high confidence)   |
|  | AZOBR_p460041 | Horizontally Transferred (high confidence)   |
|  | AZOBR_p460042 | Horizontally Transferred (medium confidence) |
|  | AZOBR_p460043 | Horizontally Transferred (medium confidence) |
|  | AZOBR_p460044 | Ancestral (medium confidence)                |
|  | AZOBR_p460045 | Ancestral (high confidence)                  |
|  | AZOBR_p460046 | Ancestral (medium confidence)                |
|  | AZOBR_p460047 | Ancestral (low confidence)                   |
|  | AZOBR_p460048 | Ancestral (low confidence)                   |
|  | AZOBR_p460049 | Unassigned                                   |
|  | AZOBR_p460050 | Horizontally Transferred (high confidence)   |
|  | AZOBR_p460051 | Unassigned                                   |
|  | AZOBR_p460052 | Horizontally Transferred (low confidence)    |
|  | AZOBR_p460053 | Horizontally Transferred (high confidence)   |
|  | AZOBR_p460054 | Horizontally Transferred (high confidence)   |
|  | AZOBR_p460055 | Horizontally Transferred (high confidence)   |
|  | AZOBR_p460056 | Unassigned                                   |
|  | AZOBR_p460057 | Unassigned                                   |
|  | AZOBR_p460058 | Horizontally Transferred (high confidence)   |
|  | AZOBR_p460059 | Horizontally Transferred (high confidence)   |
|  | AZOBR_p460060 | Horizontally Transferred (high confidence)   |
|  | AZOBR_p460061 | Horizontally Transferred (high confidence)   |
|  | AZOBR_p460062 | Horizontally Transferred (high confidence)   |
|  | AZOBR_p460063 | Horizontally Transferred (high confidence)   |
|  | AZOBR_p460064 | Unassigned                                   |
|  | AZOBR_p460065 | Ancestral (low confidence)                   |
|  | AZOBR_p460066 | Horizontally Transferred (medium confidence) |
|  | AZOBR_p460067 | Ancestral (low confidence)                   |

|  |               |                                              |
|--|---------------|----------------------------------------------|
|  | AZOBR_p460068 | Horizontally Transferred (high confidence)   |
|  | AZOBR_p460069 | Unassigned                                   |
|  | AZOBR_p460070 | Unassigned                                   |
|  | AZOBR_p460071 | Ancestral (low confidence)                   |
|  | AZOBR_p460072 | Horizontally Transferred (high confidence)   |
|  | AZOBR_p460073 | Unassigned                                   |
|  | AZOBR_p460074 | Horizontally Transferred (high confidence)   |
|  | AZOBR_p460075 | Unassigned                                   |
|  | AZOBR_p460076 | Unassigned                                   |
|  | AZOBR_p460077 | Ancestral (low confidence)                   |
|  | AZOBR_p460078 | Horizontally Transferred (low confidence)    |
|  | AZOBR_p460079 | Horizontally Transferred (low confidence)    |
|  | AZOBR_p460080 | Horizontally Transferred (medium confidence) |
|  | AZOBR_p460081 | Unassigned                                   |
|  | AZOBR_p460082 | Horizontally Transferred (low confidence)    |
|  | AZOBR_p460083 | Horizontally Transferred (low confidence)    |
|  | AZOBR_p460084 | Ancestral (low confidence)                   |
|  | AZOBR_p460085 | Horizontally Transferred (low confidence)    |
|  | AZOBR_p460086 | Horizontally Transferred (low confidence)    |
|  | AZOBR_p460087 | Horizontally Transferred (low confidence)    |
|  | AZOBR_p460088 | Horizontally Transferred (medium confidence) |
|  | AZOBR_p460089 | Horizontally Transferred (low confidence)    |
|  | AZOBR_p460090 | Horizontally Transferred (low confidence)    |
|  | AZOBR_p460091 | Ancestral (low confidence)                   |
|  | AZOBR_p460092 | Ancestral (medium confidence)                |
|  | AZOBR_p460093 | Horizontally Transferred (high confidence)   |
|  | AZOBR_p460094 | Ancestral (low confidence)                   |
|  | AZOBR_p460095 | Ancestral (low confidence)                   |
|  | AZOBR_p470001 | Unassigned                                   |
|  | AZOBR_p470002 | Unassigned                                   |
|  | AZOBR_p470003 | Horizontally Transferred (low confidence)    |
|  | AZOBR_p470004 | Horizontally Transferred (high confidence)   |
|  | AZOBR_p470005 | Unassigned                                   |
|  | AZOBR_p470006 | Horizontally Transferred (low confidence)    |
|  | AZOBR_p470007 | Unassigned                                   |
|  | AZOBR_p470008 | Horizontally Transferred (high confidence)   |
|  | AZOBR_p470009 | Unassigned                                   |
|  | AZOBR_p470010 | Unassigned                                   |
|  | AZOBR_p470011 | Unassigned                                   |
|  | AZOBR_p470012 | Horizontally Transferred (high confidence)   |
|  | AZOBR_p470013 | Horizontally Transferred (high confidence)   |
|  | AZOBR_p470014 | Horizontally Transferred (low confidence)    |
|  | AZOBR_p470015 | Unassigned                                   |
|  | AZOBR_p470016 | Horizontally Transferred (medium confidence) |
|  | AZOBR_p470017 | Ancestral (medium confidence)                |
|  | AZOBR_p470018 | Ancestral (medium confidence)                |
|  | AZOBR_p470019 | Ancestral (low confidence)                   |
|  | AZOBR_p470020 | Horizontally Transferred (high confidence)   |
|  | AZOBR_p470021 | Ancestral (medium confidence)                |
|  | AZOBR_p470022 | Unassigned                                   |
|  | AZOBR_p470023 | Horizontally Transferred (high confidence)   |
|  | AZOBR_p470024 | Ancestral (low confidence)                   |
|  | AZOBR_p470025 | Unassigned                                   |
|  | AZOBR_p470026 | Unassigned                                   |
|  | AZOBR_p470027 | Unassigned                                   |
|  | AZOBR_p470028 | Horizontally Transferred (medium confidence) |
|  | AZOBR_p470029 | Unassigned                                   |
|  | AZOBR_p470030 | Horizontally Transferred (high confidence)   |
|  | AZOBR_p470031 | Ancestral (low confidence)                   |
|  | AZOBR_p470032 | Ancestral (low confidence)                   |
|  | AZOBR_p470033 | Unassigned                                   |
|  | AZOBR_p470034 | Horizontally Transferred (high confidence)   |
|  | AZOBR_p470035 | Horizontally Transferred (high confidence)   |
|  | AZOBR_p470036 | Horizontally Transferred (low confidence)    |
|  | AZOBR_p470037 | Horizontally Transferred (low confidence)    |
|  | AZOBR_p470038 | Horizontally Transferred (high confidence)   |
|  | AZOBR_p470039 | Ancestral (medium confidence)                |
|  | AZOBR_p470040 | Ancestral (low confidence)                   |
|  | AZOBR_p470041 | Horizontally Transferred (low confidence)    |
|  | AZOBR_p470042 | Horizontally Transferred (medium confidence) |
|  | AZOBR_p470043 | Ancestral (medium confidence)                |
|  | AZOBR_p470044 | Unassigned                                   |
|  | AZOBR_p470045 | Unassigned                                   |
|  | AZOBR_p470046 | Unassigned                                   |
|  | AZOBR_p470047 | Unassigned                                   |

|  |               |                                              |
|--|---------------|----------------------------------------------|
|  | AZOBR_p470048 | Ancestral (low confidence)                   |
|  | AZOBR_p470049 | Horizontally Transferred (high confidence)   |
|  | AZOBR_p470050 | Horizontally Transferred (high confidence)   |
|  | AZOBR_p470051 | Horizontally Transferred (high confidence)   |
|  | AZOBR_p470052 | Ancestral (medium confidence)                |
|  | AZOBR_p470053 | Horizontally Transferred (high confidence)   |
|  | AZOBR_p470054 | Ancestral (medium confidence)                |
|  | AZOBR_p470055 | Ancestral (high confidence)                  |
|  | AZOBR_p470056 | Ancestral (high confidence)                  |
|  | AZOBR_p470057 | Ancestral (high confidence)                  |
|  | AZOBR_p470058 | Ancestral (low confidence)                   |
|  | AZOBR_p470059 | Ancestral (high confidence)                  |
|  | AZOBR_p470060 | Ancestral (medium confidence)                |
|  | AZOBR_p470061 | Ancestral (high confidence)                  |
|  | AZOBR_p470062 | Ancestral (high confidence)                  |
|  | AZOBR_p470063 | Horizontally Transferred (medium confidence) |
|  | AZOBR_p470064 | Horizontally Transferred (high confidence)   |
|  | AZOBR_p470065 | Ancestral (low confidence)                   |
|  | AZOBR_p470066 | Unassigned                                   |
|  | AZOBR_p470067 | Ancestral (low confidence)                   |
|  | AZOBR_p470068 | Ancestral (low confidence)                   |
|  | AZOBR_p470069 | Horizontally Transferred (high confidence)   |
|  | AZOBR_p470070 | Horizontally Transferred (high confidence)   |
|  | AZOBR_p470071 | Ancestral (medium confidence)                |
|  | AZOBR_p470072 | Ancestral (high confidence)                  |
|  | AZOBR_p470073 | Ancestral (medium confidence)                |
|  | AZOBR_p470074 | Ancestral (high confidence)                  |
|  | AZOBR_p470075 | Ancestral (high confidence)                  |
|  | AZOBR_p470076 | Ancestral (high confidence)                  |
|  | AZOBR_p470077 | Horizontally Transferred (high confidence)   |
|  | AZOBR_p470078 | Ancestral (low confidence)                   |
|  | AZOBR_p470079 | Ancestral (medium confidence)                |
|  | AZOBR_p470080 | Ancestral (medium confidence)                |
|  | AZOBR_p470081 | Ancestral (high confidence)                  |
|  | AZOBR_p470082 | Horizontally Transferred (low confidence)    |
|  | AZOBR_p470083 | Horizontally Transferred (medium confidence) |
|  | AZOBR_p470084 | Horizontally Transferred (high confidence)   |
|  | AZOBR_p470085 | Horizontally Transferred (high confidence)   |
|  | AZOBR_p470086 | Horizontally Transferred (medium confidence) |
|  | AZOBR_p470087 | Horizontally Transferred (medium confidence) |
|  | AZOBR_p470088 | Horizontally Transferred (medium confidence) |
|  | AZOBR_p470089 | Horizontally Transferred (medium confidence) |
|  | AZOBR_p470090 | Horizontally Transferred (high confidence)   |
|  | AZOBR_p470091 | Horizontally Transferred (high confidence)   |
|  | AZOBR_p470092 | Horizontally Transferred (high confidence)   |
|  | AZOBR_p470093 | Horizontally Transferred (high confidence)   |
|  | AZOBR_p470094 | Unassigned                                   |
|  | AZOBR_p470095 | Unassigned                                   |
|  | AZOBR_p470096 | Horizontally Transferred (high confidence)   |
|  | AZOBR_p470097 | Horizontally Transferred (high confidence)   |
|  | AZOBR_p470098 | Horizontally Transferred (high confidence)   |
|  | AZOBR_p470099 | Unassigned                                   |
|  | AZOBR_p470100 | Ancestral (medium confidence)                |
|  | AZOBR_p470101 | Ancestral (low confidence)                   |
|  | AZOBR_p480001 | Unassigned                                   |
|  | AZOBR_p480002 | Horizontally Transferred (high confidence)   |
|  | AZOBR_p480003 | Unassigned                                   |
|  | AZOBR_p480004 | Horizontally Transferred (high confidence)   |
|  | AZOBR_p480005 | Horizontally Transferred (medium confidence) |
|  | AZOBR_p480006 | Horizontally Transferred (medium confidence) |
|  | AZOBR_p480007 | Horizontally Transferred (high confidence)   |
|  | AZOBR_p480008 | Horizontally Transferred (high confidence)   |
|  | AZOBR_p480009 | Horizontally Transferred (medium confidence) |
|  | AZOBR_p480010 | Horizontally Transferred (medium confidence) |
|  | AZOBR_p480011 | Horizontally Transferred (medium confidence) |
|  | AZOBR_p480012 | Horizontally Transferred (medium confidence) |
|  | AZOBR_p480013 | Horizontally Transferred (high confidence)   |
|  | AZOBR_p480014 | Ancestral (low confidence)                   |
|  | AZOBR_p480015 | Ancestral (low confidence)                   |
|  | AZOBR_p480016 | Ancestral (low confidence)                   |
|  | AZOBR_p480017 | Ancestral (medium confidence)                |
|  | AZOBR_p480018 | Horizontally Transferred (high confidence)   |
|  | AZOBR_p480019 | Ancestral (low confidence)                   |
|  | AZOBR_p480020 | Unassigned                                   |
|  | AZOBR_p480021 | Ancestral (low confidence)                   |

|  |               |                                              |
|--|---------------|----------------------------------------------|
|  | AZOBR_p480022 | Unassigned                                   |
|  | AZOBR_p480023 | Horizontally Transferred (high confidence)   |
|  | AZOBR_p480024 | Horizontally Transferred (medium confidence) |
|  | AZOBR_p480025 | Ancestral (low confidence)                   |
|  | AZOBR_p480026 | Ancestral (medium confidence)                |
|  | AZOBR_p480027 | Ancestral (medium confidence)                |
|  | AZOBR_p480028 | Horizontally Transferred (high confidence)   |
|  | AZOBR_p480029 | Horizontally Transferred (high confidence)   |
|  | AZOBR_p480030 | Unassigned                                   |
|  | AZOBR_p480031 | Horizontally Transferred (high confidence)   |
|  | AZOBR_p480032 | Ancestral (low confidence)                   |
|  | AZOBR_p480033 | Horizontally Transferred (high confidence)   |
|  | AZOBR_p480034 | Horizontally Transferred (high confidence)   |
|  | AZOBR_p480035 | Horizontally Transferred (high confidence)   |
|  | AZOBR_p480036 | Horizontally Transferred (high confidence)   |
|  | AZOBR_p480037 | Unassigned                                   |
|  | AZOBR_p480038 | Unassigned                                   |
|  | AZOBR_p480039 | Horizontally Transferred (high confidence)   |
|  | AZOBR_p480040 | Horizontally Transferred (high confidence)   |
|  | AZOBR_p480041 | Ancestral (low confidence)                   |
|  | AZOBR_p480042 | Horizontally Transferred (high confidence)   |
|  | AZOBR_p480043 | Unassigned                                   |
|  | AZOBR_p480044 | Horizontally Transferred (high confidence)   |
|  | AZOBR_p480045 | Horizontally Transferred (high confidence)   |
|  | AZOBR_p480046 | Horizontally Transferred (high confidence)   |
|  | AZOBR_p480047 | Horizontally Transferred (high confidence)   |
|  | AZOBR_p480048 | Ancestral (low confidence)                   |
|  | AZOBR_p480049 | Ancestral (low confidence)                   |
|  | AZOBR_p480050 | Ancestral (low confidence)                   |
|  | AZOBR_p480051 | Ancestral (low confidence)                   |
|  | AZOBR_p480052 | Unassigned                                   |
|  | AZOBR_p480053 | Horizontally Transferred (high confidence)   |
|  | AZOBR_p480054 | Horizontally Transferred (medium confidence) |
|  | AZOBR_p480055 | Horizontally Transferred (low confidence)    |
|  | AZOBR_p480056 | Horizontally Transferred (high confidence)   |
|  | AZOBR_p480057 | Ancestral (low confidence)                   |
|  | AZOBR_p480058 | Unassigned                                   |
|  | AZOBR_p480059 | Unassigned                                   |
|  | AZOBR_p480060 | Horizontally Transferred (high confidence)   |
|  | AZOBR_p480061 | Unassigned                                   |
|  | AZOBR_p480062 | Horizontally Transferred (high confidence)   |
|  | AZOBR_p480063 | Horizontally Transferred (high confidence)   |
|  | AZOBR_p480064 | Horizontally Transferred (medium confidence) |
|  | AZOBR_p480065 | Ancestral (low confidence)                   |
|  | AZOBR_p480066 | Unassigned                                   |
|  | AZOBR_p480067 | Unassigned                                   |
|  | AZOBR_p480068 | Horizontally Transferred (high confidence)   |
|  | AZOBR_p480069 | Unassigned                                   |
|  | AZOBR_p480070 | Unassigned                                   |
|  | AZOBR_p480071 | Ancestral (medium confidence)                |
|  | AZOBR_p480072 | Unassigned                                   |
|  | AZOBR_p480073 | Horizontally Transferred (high confidence)   |
|  | AZOBR_p480074 | Horizontally Transferred (high confidence)   |
|  | AZOBR_p480075 | Unassigned                                   |
|  | AZOBR_p480076 | Unassigned                                   |
|  | AZOBR_p480077 | Ancestral (medium confidence)                |
|  | AZOBR_p480078 | Ancestral (low confidence)                   |
|  | AZOBR_p480079 | Unassigned                                   |
|  | AZOBR_p480080 | Horizontally Transferred (high confidence)   |
|  | AZOBR_p480081 | Horizontally Transferred (high confidence)   |
|  | AZOBR_p480082 | Horizontally Transferred (high confidence)   |
|  | AZOBR_p480083 | Horizontally Transferred (high confidence)   |
|  | AZOBR_p480084 | Unassigned                                   |
|  | AZOBR_p480085 | Unassigned                                   |
|  | AZOBR_p480086 | Unassigned                                   |
|  | AZOBR_p480087 | Unassigned                                   |
|  | AZOBR_p480088 | Horizontally Transferred (medium confidence) |
|  | AZOBR_p50001  | Ancestral (low confidence)                   |
|  | AZOBR_p50002  | Ancestral (low confidence)                   |
|  | AZOBR_p50003  | Unassigned                                   |
|  | AZOBR_p50004  | Ancestral (low confidence)                   |
|  | AZOBR_p50005  | Ancestral (low confidence)                   |
|  | AZOBR_p50006  | Horizontally Transferred (high confidence)   |
|  | AZOBR_p50007  | Horizontally Transferred (high confidence)   |
|  | AZOBR_p50008  | Ancestral (low confidence)                   |

|  |              |                                              |
|--|--------------|----------------------------------------------|
|  | AZOBR_p50009 | Ancestral (medium confidence)                |
|  | AZOBR_p50010 | Ancestral (low confidence)                   |
|  | AZOBR_p50011 | Ancestral (medium confidence)                |
|  | AZOBR_p50012 | Horizontally Transferred (high confidence)   |
|  | AZOBR_p50013 | Horizontally Transferred (high confidence)   |
|  | AZOBR_p50014 | Horizontally Transferred (high confidence)   |
|  | AZOBR_p50015 | Horizontally Transferred (high confidence)   |
|  | AZOBR_p50016 | Ancestral (low confidence)                   |
|  | AZOBR_p50017 | Horizontally Transferred (high confidence)   |
|  | AZOBR_p50018 | Ancestral (low confidence)                   |
|  | AZOBR_p50019 | Ancestral (medium confidence)                |
|  | AZOBR_p50020 | Ancestral (high confidence)                  |
|  | AZOBR_p50021 | Horizontally Transferred (high confidence)   |
|  | AZOBR_p50022 | Ancestral (low confidence)                   |
|  | AZOBR_p50023 | Horizontally Transferred (high confidence)   |
|  | AZOBR_p50024 | Unassigned                                   |
|  | AZOBR_p50025 | Horizontally Transferred (high confidence)   |
|  | AZOBR_p50026 | Horizontally Transferred (high confidence)   |
|  | AZOBR_p50027 | Horizontally Transferred (high confidence)   |
|  | AZOBR_p50028 | Horizontally Transferred (medium confidence) |
|  | AZOBR_p50029 | Horizontally Transferred (high confidence)   |
|  | AZOBR_p50030 | Horizontally Transferred (high confidence)   |
|  | AZOBR_p50031 | Horizontally Transferred (high confidence)   |
|  | AZOBR_p50032 | Ancestral (low confidence)                   |
|  | AZOBR_p50033 | Horizontally Transferred (medium confidence) |
|  | AZOBR_p50034 | Horizontally Transferred (medium confidence) |
|  | AZOBR_p50035 | Unassigned                                   |
|  | AZOBR_p50036 | Horizontally Transferred (medium confidence) |
|  | AZOBR_p50037 | Horizontally Transferred (medium confidence) |
|  | AZOBR_p50038 | Unassigned                                   |
|  | AZOBR_p50039 | Unassigned                                   |
|  | AZOBR_p50040 | Unassigned                                   |
|  | AZOBR_p50041 | Ancestral (medium confidence)                |
|  | AZOBR_p50042 | Ancestral (low confidence)                   |
|  | AZOBR_p50043 | Ancestral (low confidence)                   |
|  | AZOBR_p50044 | Unassigned                                   |
|  | AZOBR_p50045 | Unassigned                                   |
|  | AZOBR_p50046 | Unassigned                                   |
|  | AZOBR_p50047 | Unassigned                                   |
|  | AZOBR_p50048 | Unassigned                                   |
|  | AZOBR_p50049 | Unassigned                                   |
|  | AZOBR_p50050 | Unassigned                                   |
|  | AZOBR_p50051 | Unassigned                                   |
|  | AZOBR_p50052 | Unassigned                                   |
|  | AZOBR_p50053 | Unassigned                                   |
|  | AZOBR_p50054 | Unassigned                                   |
|  | AZOBR_p50055 | Horizontally Transferred (high confidence)   |
|  | AZOBR_p50056 | Horizontally Transferred (high confidence)   |
|  | AZOBR_p50057 | Unassigned                                   |
|  | AZOBR_p50058 | Unassigned                                   |
|  | AZOBR_p50059 | Horizontally Transferred (low confidence)    |
|  | AZOBR_p50060 | Unassigned                                   |
|  | AZOBR_p50061 | Unassigned                                   |
|  | AZOBR_p50062 | Ancestral (medium confidence)                |
|  | AZOBR_p50063 | Horizontally Transferred (low confidence)    |
|  | AZOBR_p50064 | Ancestral (medium confidence)                |
|  | AZOBR_p50065 | Horizontally Transferred (high confidence)   |
|  | AZOBR_p50066 | Horizontally Transferred (high confidence)   |
|  | AZOBR_p50067 | Horizontally Transferred (low confidence)    |
|  | AZOBR_p50068 | Horizontally Transferred (low confidence)    |
|  | AZOBR_p50069 | Horizontally Transferred (high confidence)   |
|  | AZOBR_p50070 | Horizontally Transferred (high confidence)   |
|  | AZOBR_p50071 | Horizontally Transferred (high confidence)   |
|  | AZOBR_p50072 | Horizontally Transferred (high confidence)   |
|  | AZOBR_p50073 | Horizontally Transferred (high confidence)   |
|  | AZOBR_p50074 | Horizontally Transferred (high confidence)   |
|  | AZOBR_p50075 | Horizontally Transferred (high confidence)   |
|  | AZOBR_p50076 | Horizontally Transferred (high confidence)   |
|  | AZOBR_p50077 | Horizontally Transferred (high confidence)   |
|  | AZOBR_p50078 | Horizontally Transferred (high confidence)   |
|  | AZOBR_p50079 | Horizontally Transferred (high confidence)   |
|  | AZOBR_p50080 | Horizontally Transferred (medium confidence) |
|  | AZOBR_p50081 | Horizontally Transferred (medium confidence) |
|  | AZOBR_p50082 | Horizontally Transferred (high confidence)   |
|  | AZOBR_p50083 | Horizontally Transferred (low confidence)    |

|  |              |                                              |
|--|--------------|----------------------------------------------|
|  | AZOBR_p50085 | Unassigned                                   |
|  | AZOBR_p50086 | Unassigned                                   |
|  | AZOBR_p50089 | Ancestral (low confidence)                   |
|  | AZOBR_p50090 | Horizontally Transferred (low confidence)    |
|  | AZOBR_p50091 | Horizontally Transferred (low confidence)    |
|  | AZOBR_p50092 | Ancestral (low confidence)                   |
|  | AZOBR_p50093 | Horizontally Transferred (medium confidence) |
|  | AZOBR_p50094 | Horizontally Transferred (low confidence)    |
|  | AZOBR_p50095 | Ancestral (medium confidence)                |
|  | AZOBR_p50096 | Unassigned                                   |
|  | AZOBR_p50097 | Horizontally Transferred (high confidence)   |
|  | AZOBR_p50098 | Unassigned                                   |
|  | AZOBR_p50099 | Ancestral (low confidence)                   |
|  | AZOBR_p50100 | Horizontally Transferred (high confidence)   |
|  | AZOBR_p50101 | Horizontally Transferred (high confidence)   |
|  | AZOBR_p50102 | Unassigned                                   |
|  | AZOBR_p50103 | Unassigned                                   |
|  | AZOBR_p50104 | Unassigned                                   |
|  | AZOBR_p50105 | Horizontally Transferred (high confidence)   |
|  | AZOBR_p50106 | Horizontally Transferred (low confidence)    |
|  | AZOBR_p50107 | Unassigned                                   |
|  | AZOBR_p50108 | Horizontally Transferred (high confidence)   |
|  | AZOBR_p50109 | Unassigned                                   |
|  | AZOBR_p50110 | Horizontally Transferred (high confidence)   |
|  | AZOBR_p50111 | Unassigned                                   |
|  | AZOBR_p50112 | Unassigned                                   |
|  | AZOBR_p50113 | Horizontally Transferred (high confidence)   |
|  | AZOBR_p50114 | Ancestral (low confidence)                   |
|  | AZOBR_p50115 | Unassigned                                   |
|  | AZOBR_p50116 | Unassigned                                   |
|  | AZOBR_p50117 | Horizontally Transferred (medium confidence) |
|  | AZOBR_p50118 | Unassigned                                   |
|  | AZOBR_p50119 | Unassigned                                   |
|  | AZOBR_p50120 | Unassigned                                   |
|  | AZOBR_p50121 | Unassigned                                   |
|  | AZOBR_p50122 | Unassigned                                   |
|  | AZOBR_p50123 | Horizontally Transferred (high confidence)   |
|  | AZOBR_p50124 | Unassigned                                   |
|  | AZOBR_p50125 | Ancestral (low confidence)                   |
|  | AZOBR_p50126 | Unassigned                                   |
|  | AZOBR_p50127 | Ancestral (low confidence)                   |
|  | AZOBR_p50128 | Ancestral (low confidence)                   |
|  | AZOBR_p50129 | Unassigned                                   |
|  | AZOBR_p50130 | Unassigned                                   |
|  | AZOBR_p50131 | Horizontally Transferred (high confidence)   |
|  | AZOBR_p50132 | Unassigned                                   |
|  | AZOBR_p50133 | Horizontally Transferred (high confidence)   |
|  | AZOBR_p50134 | Unassigned                                   |
|  | AZOBR_p50135 | Unassigned                                   |
|  | AZOBR_p50136 | Ancestral (low confidence)                   |
|  | AZOBR_p50137 | Horizontally Transferred (medium confidence) |
|  | AZOBR_p50138 | Horizontally Transferred (medium confidence) |
|  | AZOBR_p50139 | Unassigned                                   |
|  | AZOBR_p50140 | Unassigned                                   |
|  | AZOBR_p50141 | Unassigned                                   |
|  | AZOBR_p50142 | Unassigned                                   |
|  | AZOBR_p50143 | Horizontally Transferred (low confidence)    |
|  | AZOBR_p50144 | Ancestral (low confidence)                   |
|  | AZOBR_p50145 | Ancestral (low confidence)                   |
|  | AZOBR_p50146 | Ancestral (low confidence)                   |
|  | AZOBR_p50147 | Unassigned                                   |
|  | AZOBR_p50148 | Unassigned                                   |
|  | AZOBR_p50149 | Unassigned                                   |
|  | AZOBR_p50150 | Unassigned                                   |
|  | AZOBR_p50151 | Unassigned                                   |
|  | AZOBR_p50152 | Unassigned                                   |
|  | AZOBR_p50153 | Horizontally Transferred (high confidence)   |
|  | AZOBR_p50154 | Unassigned                                   |
|  | AZOBR_p50155 | Horizontally Transferred (high confidence)   |
|  | AZOBR_p50156 | Horizontally Transferred (high confidence)   |
|  | AZOBR_p50157 | Horizontally Transferred (medium confidence) |
|  | AZOBR_p50158 | Ancestral (low confidence)                   |
|  | AZOBR_p50159 | Ancestral (low confidence)                   |
|  | AZOBR_p50160 | Horizontally Transferred (low confidence)    |
|  | AZOBR_p50161 | Horizontally Transferred (high confidence)   |

|  |              |                                              |
|--|--------------|----------------------------------------------|
|  | AZOBR_p50162 | Horizontally Transferred (high confidence)   |
|  | AZOBR_p50163 | Horizontally Transferred (high confidence)   |
|  | AZOBR_p50164 | Horizontally Transferred (high confidence)   |
|  | AZOBR_p50165 | Ancestral (high confidence)                  |
|  | AZOBR_p50166 | Unassigned                                   |
|  | AZOBR_p60001 | Horizontally Transferred (high confidence)   |
|  | AZOBR_p60002 | Horizontally Transferred (high confidence)   |
|  | AZOBR_p60003 | Ancestral (low confidence)                   |
|  | AZOBR_p60004 | Horizontally Transferred (high confidence)   |
|  | AZOBR_p60005 | Ancestral (medium confidence)                |
|  | AZOBR_p60006 | Ancestral (low confidence)                   |
|  | AZOBR_p60007 | Ancestral (medium confidence)                |
|  | AZOBR_p60008 | Horizontally Transferred (high confidence)   |
|  | AZOBR_p60009 | Horizontally Transferred (high confidence)   |
|  | AZOBR_p60010 | Horizontally Transferred (low confidence)    |
|  | AZOBR_p60011 | Horizontally Transferred (low confidence)    |
|  | AZOBR_p60012 | Ancestral (medium confidence)                |
|  | AZOBR_p60013 | Horizontally Transferred (low confidence)    |
|  | AZOBR_p60014 | Horizontally Transferred (high confidence)   |
|  | AZOBR_p60015 | Horizontally Transferred (low confidence)    |
|  | AZOBR_p60016 | Horizontally Transferred (high confidence)   |
|  | AZOBR_p60017 | Horizontally Transferred (low confidence)    |
|  | AZOBR_p60018 | Horizontally Transferred (high confidence)   |
|  | AZOBR_p60019 | Horizontally Transferred (high confidence)   |
|  | AZOBR_p60020 | Unassigned                                   |
|  | AZOBR_p60021 | Horizontally Transferred (high confidence)   |
|  | AZOBR_p60022 | Horizontally Transferred (high confidence)   |
|  | AZOBR_p60023 | Unassigned                                   |
|  | AZOBR_p60024 | Horizontally Transferred (medium confidence) |
|  | AZOBR_p60025 | Horizontally Transferred (high confidence)   |
|  | AZOBR_p60026 | Ancestral (low confidence)                   |
|  | AZOBR_p60027 | Ancestral (low confidence)                   |
|  | AZOBR_p60028 | Ancestral (low confidence)                   |
|  | AZOBR_p60029 | Ancestral (low confidence)                   |
|  | AZOBR_p60030 | Ancestral (low confidence)                   |
|  | AZOBR_p60031 | Horizontally Transferred (low confidence)    |
|  | AZOBR_p60032 | Ancestral (low confidence)                   |
|  | AZOBR_p60033 | Horizontally Transferred (high confidence)   |
|  | AZOBR_p60034 | Horizontally Transferred (high confidence)   |
|  | AZOBR_p60035 | Horizontally Transferred (high confidence)   |
|  | AZOBR_p60036 | Ancestral (low confidence)                   |
|  | AZOBR_p60037 | Horizontally Transferred (high confidence)   |
|  | AZOBR_p60038 | Ancestral (low confidence)                   |
|  | AZOBR_p60039 | Horizontally Transferred (high confidence)   |
|  | AZOBR_p60040 | Unassigned                                   |
|  | AZOBR_p60041 | Horizontally Transferred (high confidence)   |
|  | AZOBR_p60042 | Horizontally Transferred (high confidence)   |
|  | AZOBR_p60043 | Unassigned                                   |
|  | AZOBR_p60044 | Ancestral (low confidence)                   |
|  | AZOBR_p60045 | Unassigned                                   |
|  | AZOBR_p60046 | Horizontally Transferred (high confidence)   |
|  | AZOBR_p60047 | Unassigned                                   |
|  | AZOBR_p60048 | Ancestral (high confidence)                  |
|  | AZOBR_p60049 | Ancestral (low confidence)                   |
|  | AZOBR_p60050 | Ancestral (low confidence)                   |
|  | AZOBR_p60051 | Ancestral (low confidence)                   |
|  | AZOBR_p60052 | Ancestral (low confidence)                   |
|  | AZOBR_p60053 | Horizontally Transferred (low confidence)    |
|  | AZOBR_p60054 | Horizontally Transferred (high confidence)   |
|  | AZOBR_p60055 | Horizontally Transferred (high confidence)   |
|  | AZOBR_p60056 | Horizontally Transferred (high confidence)   |
|  | AZOBR_p60057 | Unassigned                                   |
|  | AZOBR_p60058 | Ancestral (low confidence)                   |
|  | AZOBR_p60059 | Horizontally Transferred (high confidence)   |
|  | AZOBR_p60060 | Horizontally Transferred (high confidence)   |
|  | AZOBR_p60061 | Horizontally Transferred (high confidence)   |
|  | AZOBR_p60062 | Horizontally Transferred (high confidence)   |
|  | AZOBR_p60063 | Horizontally Transferred (high confidence)   |
|  | AZOBR_p60064 | Unassigned                                   |
|  | AZOBR_p60065 | Ancestral (medium confidence)                |
|  | AZOBR_p60066 | Ancestral (medium confidence)                |
|  | AZOBR_p60067 | Ancestral (medium confidence)                |
|  | AZOBR_p60068 | Ancestral (high confidence)                  |
|  | AZOBR_p60069 | Ancestral (medium confidence)                |
|  | AZOBR_p60070 | Horizontally Transferred (high confidence)   |



|  |              |                                              |
|--|--------------|----------------------------------------------|
|  | AZOBR_p60071 | Horizontally Transferred (low confidence)    |
|  | AZOBR_p60072 | Ancestral (low confidence)                   |
|  | AZOBR_p60073 | Unassigned                                   |
|  | AZOBR_p60074 | Unassigned                                   |
|  | AZOBR_p60075 | Horizontally Transferred (low confidence)    |
|  | AZOBR_p60076 | Horizontally Transferred (high confidence)   |
|  | AZOBR_p60077 | Ancestral (low confidence)                   |
|  | AZOBR_p60078 | Ancestral (low confidence)                   |
|  | AZOBR_p60079 | Horizontally Transferred (low confidence)    |
|  | AZOBR_p60080 | Ancestral (low confidence)                   |
|  | AZOBR_p60081 | Horizontally Transferred (high confidence)   |
|  | AZOBR_p60082 | Ancestral (low confidence)                   |
|  | AZOBR_p60083 | Horizontally Transferred (medium confidence) |
|  | AZOBR_p60084 | Ancestral (low confidence)                   |
|  | AZOBR_p60085 | Horizontally Transferred (low confidence)    |
|  | AZOBR_p60086 | Horizontally Transferred (low confidence)    |
|  | AZOBR_p60087 | Horizontally Transferred (low confidence)    |
|  | AZOBR_p60088 | Horizontally Transferred (low confidence)    |
|  | AZOBR_p60089 | Horizontally Transferred (low confidence)    |
|  | AZOBR_p60090 | Horizontally Transferred (low confidence)    |
|  | AZOBR_p60091 | Ancestral (low confidence)                   |
|  | AZOBR_p60092 | Horizontally Transferred (high confidence)   |
|  | AZOBR_p60093 | Unassigned                                   |
|  | AZOBR_p60094 | Horizontally Transferred (medium confidence) |
|  | AZOBR_p60095 | Unassigned                                   |
|  | AZOBR_p60096 | Horizontally Transferred (high confidence)   |
|  | AZOBR_p60097 | Horizontally Transferred (high confidence)   |
|  | AZOBR_p60098 | Unassigned                                   |
|  | AZOBR_p60099 | Unassigned                                   |
|  | AZOBR_p60100 | Unassigned                                   |
|  | AZOBR_p60101 | Unassigned                                   |
|  | AZOBR_p60102 | Unassigned                                   |
|  | AZOBR_p60103 | Unassigned                                   |
|  | AZOBR_p60104 | Unassigned                                   |
|  | AZOBR_p60105 | Unassigned                                   |
|  | AZOBR_p60106 | Unassigned                                   |
|  | AZOBR_p60107 | Horizontally Transferred (high confidence)   |
|  | AZOBR_p60108 | Unassigned                                   |
|  | AZOBR_p60109 | Horizontally Transferred (low confidence)    |
|  | AZOBR_p60110 | Ancestral (high confidence)                  |
|  | AZOBR_p60111 | Ancestral (high confidence)                  |
|  | AZOBR_p60112 | Horizontally Transferred (high confidence)   |
|  | AZOBR_p60113 | Unassigned                                   |
|  | AZOBR_p60114 | Unassigned                                   |
|  | AZOBR_p60115 | Unassigned                                   |
|  | AZOBR_p60116 | Unassigned                                   |
|  | AZOBR_p60117 | Unassigned                                   |
|  | AZOBR_p60118 | Unassigned                                   |
|  | AZOBR_p60119 | Horizontally Transferred (high confidence)   |
|  | AZOBR_p60120 | Ancestral (low confidence)                   |
|  | AZOBR_p60121 | Unassigned                                   |
|  | AZOBR_p60122 | Horizontally Transferred (high confidence)   |
|  | AZOBR_p60123 | Horizontally Transferred (high confidence)   |
|  | AZOBR_p60124 | Horizontally Transferred (low confidence)    |
|  | AZOBR_p60125 | Horizontally Transferred (low confidence)    |

Ancestry assignments for all the predicted proteins in *A. lipoferum* 4B and *A. brasiliense* Sp245, identified by their locus tags, were produced using the scheme described in Figure S3 and Materials and Methods.
