# Supplementary material for: Azospirillum Genomes Reveal Transition of Bacteria from Aquatic to Terrestrial Environments
Source: PubMed Central journal article supplement (PMC3245306; doi:10.1371/journal.pgen.1002430), 2011-12-22
Supplement: pgen.1002430.s010.pdf [file pgen.1002430.s010.pdf]

**Supplementary Table 7.** Genes that are potentially involved in adaptation of *Azospirillum* to the rhizosphere and its interaction with host plants.

| Role in                                               | Gene name         | Product                                                       | 4B           | B510       | Sp245          | Ancestry*             |
|-------------------------------------------------------|-------------------|---------------------------------------------------------------|--------------|------------|----------------|-----------------------|
| <b>Alkaline pH adaptation [1]</b>                     |                   |                                                               |              |            |                |                       |
|                                                       | <i>phaAB</i>      | pH adaptation potassium efflux system transmembrane protein   | AZOLI_p20321 | AZL_c01200 | –              | hor H                 |
|                                                       | <i>phaC</i>       | pH adaptation potassium efflux system transmembrane protein   | AZOLI_p20322 | AZL_c01210 | AZOBR_p1100017 | hor H                 |
|                                                       | <i>phaD</i>       | pH adaptation potassium efflux system transmembrane protein   | AZOLI_p20323 | AZL_c01220 | AZOBR_p1100016 | hor H                 |
|                                                       | <i>phaE</i>       | pH adaptation potassium efflux system transmembrane protein   | AZOLI_p20324 | AZL_c01230 | AZOBR_p1100015 | hor H                 |
|                                                       | <i>phaF</i>       | pH adaptation potassium efflux system protein                 | AZOLI_p20325 | AZL_c01240 | AZOBR_p1100014 | hor H                 |
|                                                       | <i>phaG</i>       | pH adaptation potassium efflux system protein                 | AZOLI_p20326 | AZL_c01250 | AZOBR_p1100013 | hor H                 |
| <b>Aromatic compound transport and metabolism [2]</b> |                   |                                                               |              |            |                |                       |
|                                                       | <i>catA</i>       | catechol 1,2 monooxygenase (EC 1.13.11.1)                     | AZOLI_p11003 | AZL_a06810 | –              | hor H                 |
|                                                       | <i>catC</i>       | muconolactone delta-isomerase (EC 5.3.3.4)                    | AZOLI_p11002 | AZL_a06820 | –              | hor H                 |
|                                                       | <i>catB</i>       | muconate cycloisomerase (EC 5.5.1.1)                          | AZOLI_p11001 | AZL_a06830 | –              | hor H                 |
|                                                       | <i>catI</i>       | 3-oxoadipate:succinyl-CoA transferase, A subunit (EC 2.8.3.6) | AZOLI_p40024 | AZL_d00530 | –              | hor H                 |
|                                                       | <i>catJ</i>       | 3-oxoadipate:succinyl-CoA transferase, B subunit (EC 2.8.3.6) | AZOLI_p40025 | AZL_d00520 | –              | hor H                 |
|                                                       | <i>pcaF</i>       | beta-ketoadipyl CoA thiolase (EC 2.3.1.16)                    | AZOLI_p40026 | AZL_d00510 | –              | hor H                 |
|                                                       | <i>catD</i>       | 3-oxoadipate enol-lactonase II (EC 3.1.1.24)                  | AZOLI_p40027 | AZL_d00500 | –              | anc L                 |
|                                                       |                   | 3-oxoadipate enol-lactonase II (EC 3.1.1.24)                  | –            | –          | AZOBR_70204    | hor L                 |
|                                                       | <i>pcaC</i>       | 4-carboxymuconolactone decarboxylase (EC 4.1.1.44)            | AZOLI_p40028 | AZL_d00490 | –              | unassigned,unassigned |
|                                                       | <i>pcaB</i>       | 3-carboxy-cis,cis-muconate cycloisomerase (EC 5.5.1.2)        | AZOLI_p40029 | AZL_d00480 | –              | hor H                 |
|                                                       | <i>pcaH</i>       | protocatechuate 3,4-dioxygenase beta chain (EC 1.13.11.3)     | AZOLI_p40030 | AZL_d00470 | –              | anc L                 |
|                                                       | <i>pcaG</i>       | protocatechuate 3,4-dioxygenase alpha chain (EC 1.13.11.3)    | AZOLI_p40031 | AZL_d00460 | –              | anc L                 |
|                                                       | –                 | hydroxyquinol 1,2-dioxygenase (EC 1.13.11.37)                 | AZOLI_p10976 | AZL_a08930 | –              | anc L                 |
|                                                       | –                 | maleylacetate reductase (EC 1.3.1.32)                         | AZOLI_p10977 | AZL_a08920 | –              | hor H                 |
|                                                       | <i>vanB</i>       | vanillate O-demethylase oxidoreductase (EC 1.14.13.-)         | AZOLI_p10989 | AZL_a08830 | –              | hor H                 |
|                                                       | <i>pobA/ phbH</i> | 4-hydroxybenzoate-3-monooxygenase (EC 1.14.13.2)              | AZOLI_p40609 | AZL_d01000 | –              | hor H                 |
|                                                       | <i>ligB</i>       | protocatechuate 4,5-dioxygenase, beta chain (EC 1.13.11.8)    | –            | –          | AZOBR_p310188  | anc L                 |
|                                                       | <i>ligA</i>       | protocatechuate 4,5-dioxygenase, alpha chain (EC 1.13.11.8)   | –            | –          | AZOBR_p310189  | unassigned            |
|                                                       | <i>ligI</i>       | 2-pyrone-4,6-dicarboxylic acid hydrolase (EC 3.1.1.57)        | –            | –          | AZOBR_p310190  | anc L                 |
|                                                       | <i>ligK</i>       | 4-carboxy-4-hydroxy-2-oxoadipate aldolase (EC 4.1.3.17)       | AZOLI_p20168 | –          | AZOBR_p310192  | hor M                 |
|                                                       | <i>ligC</i>       | 4-carboxy-2-hydroxymuconate-6-semialdehyde dehydrogenase (EC  | –            | –          | AZOBR_p310194  | anc L                 |

|             |                                                               |              |            |               |                   |
|-------------|---------------------------------------------------------------|--------------|------------|---------------|-------------------|
|             | 1.2.1.45)                                                     |              |            |               |                   |
| –           | muconate cycloisomerase (EC 5.5.1.1)                          | AZOLI_p40287 | AZL_d02920 | AZOBR_p170014 | hor H             |
| <i>gtdA</i> | gentisate 1,2-dioxygenase (EC 1.13.11.4)                      | AZOLI_p20646 | AZL_a09180 | –             | hor H             |
| <i>nagL</i> | maleylpyruvate isomerase (EC 5.2.1.4)                         | AZOLI_p20652 | AZL_a09240 | –             | anc M,anc L       |
| <i>nagK</i> | fumarylpyruvate hydrolase (EC 3.7.1.5)                        | AZOLI_p20653 | AZL_a09250 | –             | hor H             |
| –           | putative fumarylpyruvate hydrolase (EC 3.7.1.5)               | AZOLI_0049   | AZL_026390 | AZOBR_10442   | hor M,hor M,hor H |
| <i>hmgA</i> | homogentisate 1,2-dioxygenase (EC 1.13.11.5)                  | AZOLI_p40081 | AZL_d04870 | –             | hor H             |
| <i>maiA</i> | maleylacetoacetate isomerase (EC 5.2.1.2)                     | AZOLI_2553   | AZL_024560 | –             | anc L             |
| –           | putative fumarylacetoacetate hydrolase (EC 3.7.1.2)           | AZOLI_2565   | AZL_024660 | –             | anc L,hor H       |
| <i>paaK</i> | phenylacetyl-CoA ligase (EC 6.2.1.30)                         | AZOLI_p40257 | AZL_d01530 | –             | anc M             |
| <i>paaJ</i> | beta-ketoadipyl CoA thiolase (EC 2.3.1.-)                     | AZOLI_p40258 | –          | –             | hor M             |
| <i>paal</i> | phenylacetate degradation protein with thioesterase domain    | AZOLI_p40259 | AZL_d01540 | –             | anc M             |
| <i>paaH</i> | 3-hydroxybutyryl-CoA dehydrogenase (EC 1.1.1.-)               | AZOLI_p40260 | AZL_d01550 | –             | anc L             |
| <i>paaG</i> | enoyl-CoA hydratase, phenylacetate catabolism (EC 4.2.1.17)   | AZOLI_p40261 | AZL_d01560 | –             | anc L             |
| <i>paaN</i> | aldehyde dehydrogenase, phenylacetate catabolism (EC 1.2.1.-) | AZOLI_p40262 | AZL_d01570 | –             | hor H             |
| <i>paaE</i> | phenylacetate-CoA oxygenase, PaaE subunit                     | AZOLI_p40263 | AZL_d01580 | –             | hor H             |
| <i>paaD</i> | phenylacetate-CoA oxygenase, PaaD subunit                     | AZOLI_p40264 | AZL_d01590 | –             | hor H             |
| <i>paaC</i> | phenylacetate-CoA oxygenase, PaaC subunit                     | AZOLI_p40265 | AZL_d01600 | –             | hor H             |
| <i>paaB</i> | phenylacetate-CoA oxygenase, PaaB subunit                     | AZOLI_p40266 | AZL_d01610 | –             | hor H             |
| <i>paaA</i> | phenylacetate-CoA oxygenase, PaaA subunit                     | AZOLI_p40267 | AZL_d01620 | –             | hor L             |
| –           | aromatic-ring-hydroxylating dioxygenase, alpha subunit        | AZOLI_p10986 | AZL_a08860 | –             | hor L             |
| –           | aromatic-ring-hydroxylating dioxygenase, beta subunit         | AZOLI_p10987 | AZL_a08850 | –             | hor L             |
| –           | aromatic-ring-hydroxylating dioxygenase, ferredoxin subunit   | AZOLI_p20647 | AZL_a09190 | –             | hor H             |
| –           | aromatic-ring-hydroxylating dioxygenase, beta subunit         | AZOLI_p20648 | AZL_a09200 | –             | hor H             |
| –           | aromatic-ring-hydroxylating dioxygenase, alpha subunit        | AZOLI_p20649 | AZL_a09210 | –             | hor H             |
| –           | aromatic-ring-hydroxylated dioxygenase, FAD reductase subunit | AZOLI_p20650 | AZL_a09220 | –             | hor H             |
| –           | hydroxybenzoate transporter                                   | –            | AZL_b03660 | –             | anc L             |
| –           | protocatechuate transporter                                   | –            | –          | AZOBR_p310195 | anc L             |
| <i>pcaK</i> | hydroxybenzoate transporter                                   | AZOLI_p20645 | AZL_a09170 | –             | hor H             |

### Attachment [3]

|                |                       |   |            |               |       |
|----------------|-----------------------|---|------------|---------------|-------|
| <i>flp/fap</i> | component of TAD pili | – | –          | AZOBR_p460077 | anc L |
| <i>flp/fap</i> | component of TAD pili | – | AZL_001250 | –             | anc L |
| <i>cpaA</i>    | component of TAD pili | – | AZL_001260 | –             | hor H |
| <i>cpaA</i>    | component of TAD pili | – | –          | AZOBR_p460078 | hor L |
| <i>cpaB</i>    | component of TAD pili | – | AZL_001270 | –             | hor M |
| <i>cpaB</i>    | component of TAD pili | – | –          | AZOBR_p460079 | hor L |

|             |                                                                        |              |            |                |                   |
|-------------|------------------------------------------------------------------------|--------------|------------|----------------|-------------------|
| <i>cpaC</i> | component of TAD pili                                                  | –            | AZL_001280 | AZOBR_p460080  | hor H,hor M       |
| <i>cpaD</i> | component of TAD pili                                                  | –            | AZL_001290 | –              | hor H             |
| <i>cpaD</i> | component of TAD pili                                                  | –            | –          | AZOBR_p460081  | unassigned        |
| <i>cpaE</i> | component of TAD pili                                                  | –            | AZL_001300 | –              | hor M             |
| <i>cpaE</i> | component of TAD pili                                                  | –            | –          | AZOBR_p460082  | hor L             |
| <i>cpaF</i> | component of TAD pili                                                  | –            | AZL_001310 | –              | anc L             |
| <i>cpaF</i> | component of TAD pili                                                  | –            | –          | AZOBR_p460084  | anc L             |
| <i>tadB</i> | component of TAD pili                                                  | –            | AZL_001320 | –              | unassigned        |
| <i>tadB</i> | component of TAD pili                                                  | –            | –          | AZOBR_p460085  | hor L             |
| <i>tadC</i> | component of TAD pili                                                  | –            | AZL_001330 | –              | hor M             |
| <i>tadC</i> | component of TAD pili                                                  | –            | –          | AZOBR_p460087  | hor L             |
| <i>tadD</i> | component of TAD pili                                                  | –            | –          | AZOBR_p460088  | hor M             |
| <i>tadE</i> | component of TAD pili                                                  | –            | AZL_001340 | AZOBR_p460089  | hor L,hor H       |
| <i>tadF</i> | component of TAD pili                                                  | –            | AZL_001350 | AZOBR_p460090  | hor L,hor H       |
| <i>tadG</i> | component of TAD pili                                                  | –            | AZL_001360 | –              | anc L             |
| <i>tadG</i> | component of TAD pili                                                  | –            | –          | AZOBR_p460091  | anc L             |
| <i>celA</i> | cellulose synthase                                                     | AZOLI_p30427 | AZL_c05160 | –              | unassigned        |
| <i>celB</i> | cellulose synthase                                                     | AZOLI_p30428 | AZL_c05170 | –              | hor H             |
| –           | poly(beta-D-mannuronate) O-acetylase (alginate biosynthesis)           | AZOLI_0390   | AZL_005370 | AZOBR_170002   | hor H             |
| <i>kdsA</i> | 3-deoxy-D-manno-octulosonic acid 8-phosphate synthetase                | AZOLI_1226   | AZL_013740 | AZOBR_100318   | anc M,anc L,anc M |
| –           | UDP-glucose/glucuronate epimerase                                      | AZOLI_2265   | AZL_021990 | AZOBR_140024   | anc H             |
| –           | UDP-galactopyranose mutase                                             | AZOLI_p30013 | –          | AZOBR_p1100104 | hor H             |
| <i>galU</i> | UTP-glucose-1-phosphate uridylyltransferase                            | AZOLI_p40163 | AZL_d00310 | AZOBR_p440128  | anc M             |
| <i>glmM</i> | phosphoglucosamine mutase                                              | AZOLI_p50061 | AZL_e01250 | AZOBR_100216   | anc H             |
| <i>rfbE</i> | CDP-tyvelose-2-epimerase                                               | AZOLI_p50348 | –          | AZOBR_p210161  | hor M             |
| <i>cpsB</i> | mannose-6-phosphate isomerase/mannose-1-phosphate<br>guanyltransferase | AZOLI_p60182 | AZL_f01870 | –              | anc L,anc M       |
| <i>rfbB</i> | dTDP-D-glucose 4,6-dehydratase                                         | AZOLI_p60197 | AZL_f01790 | –              | hor H             |
| –           | glucose-1-phosphate cytidylyltransferase                               | –            | AZL_f01360 | –              | hor H             |
| –           | UDP-glucose/GDP-mannose dehydrogenase                                  | –            | –          | AZOBR_p230003  | hor H             |
| –           | dTDP-4,deoxyrhamnose 3,5 epimerase (fragment)                          | –            | –          | AZOBR_p60004   | hor H             |
| <i>rfbB</i> | dTDP-D-glucose 4,6-dehydratase                                         | –            | –          | AZOBR_p60005   | anc M             |
| –           | UDP-glucose/GDP-mannose dehydrogenase                                  | –            | –          | AZOBR_p60035   | hor H             |
| <i>manC</i> | mannose-1-phosphate guanyltransferase                                  | –            | –          | AZOBR_p60091   | anc L             |

---

#### Carbohydrate and alcohol transport and metabolism [4]

|             |                                            |              |            |               |       |
|-------------|--------------------------------------------|--------------|------------|---------------|-------|
| <i>araB</i> | ribulo-/ribitol kinase (EC 2.7.1.16)       | AZOLI_p20644 | AZL_b05880 | –             | hor L |
| –           | L-arabinose 1-dehydrogenase (EC 1.1.1.146) | AZOLI_p50383 | AZL_e03690 | AZOBR_p440166 | hor H |

|              |                                                               |              |            |               |                        |
|--------------|---------------------------------------------------------------|--------------|------------|---------------|------------------------|
| _            | L-arabinonate dehydratase (EC 4.2.1.25)                       | AZOLI_p50384 | AZL_e03700 | AZOBR_p440167 | hor H                  |
| _            | putative L-arabinolactonase (EC 3.1.1.15)                     | AZOLI_p50378 | AZL_e03640 | AZOBR_p440161 | anc L                  |
| <i>araD</i>  | 2-dehydro-3-deoxy-L-arabinonate dehydratase (EC 4.2.1.43)     | AZOLI_p50377 | AZL_e03630 | AZOBR_p440160 | hor H                  |
| _            | 2-ketoglutarate semialdehyde dehydrogenase (EC 1.2.1.26)      | AZOLI_p50376 | AZL_e02770 | AZOBR_p180015 | hor H                  |
| <i>adhE2</i> | aldehyde-alcohol dehydrogenase (EC 1.2.1.10 / 1.1.1.1)        | AZOLI_p10253 | AZL_a08020 | AZOBR_p470098 | hor H                  |
| <i>adhE1</i> | aldehyde-alcohol dehydrogenase (EC 1.2.1.10 / 1.1.1.1)        | AZOLI_p20688 | _          | _             | hor H                  |
| _            | alcohol dehydrogenase, zinc-binding (EC 1.1.1.1)              | AZOLI_p30374 | AZL_c00300 | _             | hor H                  |
| _            | alcohol dehydrogenase, zinc-binding (EC 1.1.1.1)              | AZOLI_p10391 | AZL_a07970 | _             | hor H                  |
| _            | alcohol dehydrogenase, zinc-binding (EC 1.1.1.1)              | _            | _          | AZOBR_190004  | hor H                  |
| _            | alcohol dehydrogenase, iron-type (EC 1.1.1.1)                 | _            | AZL_b03380 | AZOBR_p330019 | hor H                  |
| <i>fruK</i>  | fructose-1-phosphate kinase (EC 2.7.1.56)                     | AZOLI_p30558 | AZL_c02620 | _             | anc L                  |
| <i>galM1</i> | aldose 1-epimerase (EC 5.1.3.3)                               | AZOLI_p10528 | AZL_a09030 | AZOBR_p440169 | hor H                  |
| <i>galM2</i> | aldose 1-epimerase (EC 5.1.3.3)                               | AZOLI_p50370 | AZL_e03560 | _             | hor H                  |
| _            | putative galactokinase (EC 2.7.1.6)                           | AZOLI_p60015 | _          | _             | anc L                  |
| _            | putative galactokinase (EC 2.7.1.6)                           | _            | AZL_f00470 | _             | anc L                  |
| <i>galE1</i> | UDP-glucose 4-epimerase (EC 5.1.3.2)                          | AZOLI_p60194 | AZL_f01830 | AZOBR_p60033  | hor H                  |
| <i>galE2</i> | UDP-glucose 4-epimerase (EC 5.1.3.2)                          | AZOLI_p20384 | AZL_a07190 | AZOBR_p210032 | hor L                  |
| _            | putative $\beta$ -phosphoglucomutase (EC 5.4.2.6)             | AZOLI_p30301 | _          | AZOBR_p470037 | hor L                  |
| <i>dgoK</i>  | 2-keto-3-deoxy-galactonokinase (EC 2.7.1.58)                  | AZOLI_p30272 | AZL_c04390 | AZOBR_p210119 | unassigned             |
| <i>dgoA</i>  | 2-dehydro-3-deoxy-6-phosphogalactonate aldolase (EC 4.1.2.21) | AZOLI_p30273 | AZL_c04400 | AZOBR_p210117 | hor M                  |
| <i>uxaC</i>  | glucuronate isomerase (EC 5.3.1.12)                           | AZOLI_p40500 | AZL_d01370 | AZOBR_p460005 | hor H                  |
| <i>uxaB</i>  | altronate oxidoreductase (EC 1.1.1.58)                        | AZOLI_p30296 | AZL_c04510 | AZOBR_p440170 | hor H                  |
| <i>uxaA</i>  | altronate hydrolase (EC 4.2.1.7)                              | AZOLI_p40501 | AZL_d01360 | AZOBR_p460006 | anc L,anc L,unassigned |
| <i>kdgK</i>  | ketodeoxygluconokinase (EC 2.7.1.45)                          | AZOLI_p40503 | AZL_d01340 | AZOBR_p410051 | hor H                  |
| <i>kduI1</i> | 5-keto 4-deoxyuronate isomerase (EC 5.1.3.17)                 | AZOLI_p20544 | _          | _             | hor H                  |
| <i>kduI2</i> | 5-keto 4-deoxyuronate isomerase (EC 5.1.3.17)                 | AZOLI_p40492 | AZL_d01450 | AZOBR_p420029 | hor H                  |
| <i>kduD1</i> | 2-deoxy-D-gluconate 3-dehydrogenase (EC 1.1.1.125)            | AZOLI_p20543 | _          | AZOBR_p420028 | hor H                  |
| <i>kduD2</i> | 2-deoxy-D-gluconate 3-dehydrogenase (EC 1.1.1.125)            | AZOLI_p40493 | AZL_d01440 | AZOBR_p450010 | hor H                  |
| <i>uxuA1</i> | mannonate hydrolyase (EC 4.2.1.8)                             | AZOLI_p20264 | AZL_a08380 | _             | hor H                  |
| <i>uxuA2</i> | mannonate hydrolyase (EC 4.2.1.8)                             | AZOLI_p50109 | AZL_e02160 | AZOBR_p450004 | hor H                  |
| <i>uxuB1</i> | mannonate oxidoreductase (EC 1.1.1.57)                        | AZOLI_p20265 | AZL_a08370 | _             | unassigned             |
| <i>uxuB2</i> | mannonate oxidoreductase (EC 1.1.1.57)                        | AZOLI_p50104 | AZL_e02210 | AZOBR_p450005 | anc L                  |
| <i>gntK</i>  | gluconate kinase 2 (EC 2.7.1.12)                              | AZOLI_p40040 | AZL_d00380 | _             | hor H                  |
| _            | putative gluconate kinase 2 (EC 2.7.1.12)                     | _            | _          | AZOBR_p130030 | hor H                  |
| _            | putative 6-phosphogluconate dehydrogenase (EC 1.1.1.44)       | AZOLI_p10235 | AZL_a04610 | AZOBR_p310081 | unassigned             |
| <i>eda</i>   | 2-dehydro-3-deoxy-6-phosphogalactonate aldolase (EC 4.1.2.14) | AZOLI_p50154 | AZL_e04020 | _             | hor H                  |

|              |                                                               |              |            |                     |                                 |
|--------------|---------------------------------------------------------------|--------------|------------|---------------------|---------------------------------|
| <i>edd</i>   | 6-phosphogluconate dehydratase (EC 4.2.1.12)                  | AZOLI_p30595 | AZL_a09920 | _                   | hor M,hor H                     |
| <i>pgi</i>   | glucose-6-phosphate isomerase (EC 5.3.1.9)                    | AZOLI_0602   | AZL_007010 | AZOBR_70008         | anc L                           |
| <i>pfkA</i>  | 6-phosphofructokinase (EC 2.7.1.11)                           | AZOLI_1428   | AZL_017430 | AZOBR_100017        | anc M                           |
| <i>glpX</i>  | fructose-1,6-bisphosphatase (EC 3.1.3.11)                     | AZOLI_1545   | AZL_010940 | AZOBR_100390        | anc M                           |
| <i>fbaB</i>  | fructose-bisphosphate aldolase, class I (EC 4.1.2.13)         | AZOLI_0810   | AZL_009650 | AZOBR_150016        | anc M                           |
| <i>tpiA</i>  | triosephosphate isomerase (EC 5.3.1.1)                        | AZOLI_1222   | AZL_013680 | AZOBR_100314        | anc M,anc H                     |
| <i>gapB1</i> | glyceraldehyde 3-phosphate dehydrogenase (EC 1.2.1.12)        | AZOLI_0815   | AZL_009710 | AZOBR_150011        | anc L                           |
| <i>gapB2</i> | glyceraldehyde 3-phosphate dehydrogenase (EC 1.2.1.12)        | AZOLI_p20464 | _          | _                   | anc L                           |
| <i>pgk</i>   | phosphoglycerate kinase (EC 2.7.2.3)                          | AZOLI_2630   | AZL_025100 | AZOBR_40277         | anc H                           |
| _            | phosphoglycerate kinase fragment (EC 2.7.2.3)                 | AZOLI_p20463 | AZL_b03050 | _                   | anc H                           |
| <i>gpmA</i>  | phosphoglycerate mutase (EC 5.4.2.1)                          | AZOLI_p10567 | AZL_a06650 | AZOBR_p1120003      | anc L                           |
| <i>gpml</i>  | phosphoglycerate mutase (EC 5.4.2.1)                          | AZOLI_2417   | AZL_023340 | AZOBR_40314         | anc M,anc M,anc H               |
| <i>eno1</i>  | enolase (EC 4.2.1.11)                                         | AZOLI_p10268 | AZL_a02700 | AZOBR_100325        | anc H                           |
| <i>eno2</i>  | enolase (EC 4.2.1.11)                                         | AZOLI_p20459 | AZL_b03090 | AZOBR_p420024       | anc H                           |
| <i>pykA1</i> | pyruvate kinase (EC 2.7.1.40)                                 | AZOLI_p10291 | AZL_a03300 | AZOBR_110012        | anc H                           |
| <i>pykA2</i> | pyruvate kinase (EC 2.7.1.40)                                 | AZOLI_p10527 | AZL_a09040 | AZOBR_p420013       | anc H                           |
| <i>pykA3</i> | pyruvate kinase (EC 2.7.1.40)                                 | AZOLI_p40106 | AZL_d05100 | AZOBR_p1160003      | unassigned,hor M,<br>unassigned |
| <i>glk</i>   | glucokinase (2.7.1.2)                                         | AZOLI_0164   | AZL_002850 | AZOBR_70092         | anc H                           |
| <i>gcd</i>   | quinoprotein glucose dehydrogenase (EC 1.1.5.2)               | AZOLI_p50302 | AZL_e1560  | _                   | hor H                           |
| _            | Gluconolactonase (EC 3.1.1.17)                                | _            | AZL_a09340 | _                   | hor H                           |
| _            | Gluconate 2-dehydrogenase subunit (EC 1.1.99.3), cytochrome C | AZOLI_p20466 | _          | _                   | hor H                           |
| _            | Gluconate 2-dehydrogenase subunit (EC 1.1.99.3), FAD binding  | AZOLI_p20467 | _          | _                   | hor M                           |
| _            | Gluconate 2-dehydrogenase subunit (EC 1.1.99.3)               | AZOLI_p20468 | _          | _                   | hor M                           |
| _            | Gluconate 2-dehydrogenase flavoprotein (EC 1.1.99.3)          | AZOLI_p10738 | AZL_c02930 | AZOBR_p460054       | hor H                           |
| <i>glpK</i>  | Glycerol kinase (EC 2.7.1.30)                                 | AZOLI_p50190 | AZL_e03010 | AZOBR_p280095       | hor L                           |
| <i>glpD</i>  | sn-glycerol-3-phosphate dehydrogenase (EC 1.1.5.3)            | AZOLI_p50197 | AZL_e03080 | _                   | hor L                           |
| <i>glpD</i>  | sn-glycerol-3-phosphate dehydrogenase (EC 1.1.5.3)            | _            | _          | AZOBR_p280087       | hor L                           |
| <i>gldA</i>  | Glycerol dehydrogenase (EC 1.1.1.6)                           | _            | _          | AZOBR_100391        | hor H                           |
| <i>iolB</i>  | 5-deoxy-gluconate isomerase (EC 5.3.1.-)                      | _            | AZL_b00950 | _                   | hor H                           |
| <i>iolG</i>  | myo-inositol 2-dehydrogenase (EC 1.1.1.18)                    | _            | AZL_b00980 | _                   | anc L                           |
| <i>iolA</i>  | methylmalonate-semialdehyde dehydrogenase (EC 1.2.1.27)       | _            | AZL_b01030 | _                   | hor L                           |
| _            | methylmalonate-semialdehyde dehydrogenase (EC 1.2.1.27)       | AZOLI_p10852 | AZL_a07240 | AZOBRv2_p21006<br>3 | anc L                           |
| <i>iolE</i>  | Inosose dehydratase (EC 4.2.1.44)                             | _            | AZL_b01040 | _                   | unassigned                      |
| <i>iolB</i>  | Epi-inositol hydrolase (EC 3.7.1.-)                           | _            | AZL_b01050 | _                   | anc L                           |
| <i>iolC</i>  | 5-dehydro-2-deoxygluconokinase (EC 2.7.1.92)                  | _            | AZL_b01060 | _                   | hor L                           |

|              |                                                                          |              |            |               |                        |
|--------------|--------------------------------------------------------------------------|--------------|------------|---------------|------------------------|
| <i>rsbK</i>  | ribokinase (EC 2.7.1.15)                                                 | AZOLI_p20179 | –          | –             | hor L                  |
| –            | ribokinase (EC 2.7.1.15)                                                 | –            | AZL_b03490 | –             | hor L                  |
| <i>deoK</i>  | deoxyribokinase/ribokinase (EC 2.7.1.15)                                 | AZOLI_p20643 | AZL_b05870 | –             | anc L                  |
| <i>deoM</i>  | deoxyribose mutarotase                                                   | AZOLI_p20642 | AZL_b05860 | –             | anc L                  |
| <i>glgP</i>  | glycogen phosphorylase (EC 2.4.1.1)                                      | AZOLI_1134   | AZL_014210 | AZOBR_p110080 | anc H                  |
| –            | amyl $\alpha$ -1,6-glucosidase (EC 3.2.1.33)                             | AZOLI_0954   | –          | AZOBR_180051  | unassigned,unassigned  |
| <i>xylA</i>  | D-xylose isomerase (EC 5.3.1.5)                                          | AZOLI_p20701 | AZL_b00070 | AZOBR_p330086 | hor H                  |
| <i>xylB</i>  | xylulose kinase (EC 2.7.1.17)                                            | AZOLI_p20702 | AZL_b00080 | –             | hor H                  |
| –            | xylulose kinase (EC 2.7.1.17)                                            | –            | –          | AZOBR_p330085 | hor H                  |
| <i>fruB1</i> | PEP-dependent fructose phosphotransferase system, EI/HPr/EIIA components | AZOLI_p30557 | AZL_c02630 | AZOBR_p480015 | anc L                  |
| –            | sugar ABC transporter, ATP-binding component                             | AZOLI_0562   | AZL_006710 | AZOBR_10003   | unassigned,anc L,anc L |
| –            | sugar ABC transporter, permease component                                | AZOLI_0560   | AZL_006690 | AZOBR_10005   | anc L                  |
| –            | sugar ABC transporter, permease component                                | AZOLI_0561   | AZL_006700 | AZOBR_10004   | hor H                  |
| –            | sugar ABC transporter, substrate-binding component                       | AZOLI_0558   | AZL_006680 | AZOBR_10006   | hor H                  |
| <i>kdgT</i>  | 2-keto-3-deoxy-D-gluconate transporter                                   | AZOLI_p20545 | –          | AZOBR_p420031 | hor H                  |
| <i>xylF</i>  | D-xylose ABC transporter, periplasmic solute-binding component           | AZOLI_p20700 | AZL_b00060 | –             | hor H                  |
| <i>xylH</i>  | D-xylose ABC transporter, permease component                             | AZOLI_p20699 | AZL_b00050 | –             | hor H                  |
| <i>fruA</i>  | fructose phosphotransferase system, IIB/IIC components                   | AZOLI_p30559 | AZL_c02610 | AZOBR_p480016 | anc L                  |
| <i>ptsG</i>  | fused glucose-specific PTS enzymes: IIB and IIC components               | AZOLI_p20577 | AZL_b05000 | –             | hor H                  |
| <i>exuT</i>  | hexuronate transporter                                                   | AZOLI_p30300 | AZL_c04530 | AZOBR_p230048 | hor H                  |
| <i>fruB2</i> | PEP-dependent fructose phosphotransferase system, EI/HPr/EIIA components | AZOLI_p20578 | AZL_b04990 | –             | hor H                  |
| –            | polysaccharide ABC transporter, ATP-binding component                    | AZOLI_p60200 | –          | –             | anc L                  |
| –            | polysaccharide ABC type transporter, permease component                  | AZOLI_p60201 | –          | –             | hor H                  |
| <i>nagE</i>  | PTS system, N-acetylglucosamine-specific IIBC component                  | AZOLI_p20570 | AZL_b05060 | –             | hor H                  |
| –            | putative glycerol ABC transporter, ATP-binding component                 | –            | –          | AZOBR_p280089 | hor H                  |
| –            | putative glycerol ABC transporter, ATP-binding component                 | –            | –          | AZOBR_p280088 | hor H                  |
| –            | putative H <sup>+</sup> /gluconate symporter                             | AZOLI_p40131 | AZL_d00120 | –             | hor H                  |
| –            | putative periplasmic component of ABC superfamily                        | AZOLI_p50230 | AZL_e03720 | –             | anc L                  |
| –            | putative sugar ABC transporter, ATP-binding component                    | AZOLI_p50195 | AZL_e03060 | –             | hor H                  |
| –            | putative sugar ABC transporter, ATP-binding component                    | AZOLI_p50196 | AZL_e03070 | –             | hor H                  |
| –            | putative sugar ABC transporter, ATP-binding component                    | –            | –          | AZOBR_p330099 | hor H                  |
| –            | putative sugar ABC transporter, ATP-binding component                    | –            | –          | AZOBR_p180019 | hor H                  |
| –            | putative sugar ABC transporter, ATP-binding component                    | –            | –          | AZOBR_p280021 | anc L                  |
| –            | putative sugar ABC transporter, periplasmic component                    | AZOLI_p20638 | AZL_b05820 | –             | anc L                  |
| –            | putative sugar ABC transporter, periplasmic component                    | AZOLI_p20715 | AZL_a02410 | –             | hor H                  |

|              |                                                                                        |              |            |                |       |
|--------------|----------------------------------------------------------------------------------------|--------------|------------|----------------|-------|
| –            | putative sugar ABC transporter, periplasmic component                                  | AZOLI_p50191 | AZL_e03020 | AZOBR_p280093  | hor H |
| –            | putative sugar ABC transporter, periplasmic component                                  | –            | –          | AZOBR_p330102  | hor H |
| –            | putative sugar ABC transporter, periplasmic component                                  | –            | –          | AZOBR_p180016  | hor H |
| –            | putative sugar ABC transporter, periplasmic component                                  | –            | –          | AZOBR_p280018  | anc L |
| –            | putative sugar ABC transporter, permease component                                     | AZOLI_p50193 | AZL_e03040 | AZOBR_p280091  | hor H |
| –            | putative sugar ABC transporter, permease component                                     | AZOLI_p50194 | AZL_e03050 | AZOBR_p280090  | hor H |
| –            | putative sugar ABC transporter, permease component                                     | –            | –          | AZOBR_p330100  | hor H |
| –            | putative sugar ABC transporter, permease component                                     | –            | –          | AZOBR_p330101  | hor H |
| –            | putative sugar ABC transporter, permease component                                     | –            | –          | AZOBR_p180017  | hor H |
| –            | putative sugar ABC transporter, permease component                                     | –            | –          | AZOBR_p180018  | hor H |
| –            | putative sugar ABC transporter, permease component                                     | –            | –          | AZOBR_p280019  | anc L |
| –            | putative sugar ABC transporter, permease component                                     | –            | –          | AZOBR_p280020  | anc L |
| –            | putative sugar transporter of the major facilitator superfamily                        | AZOLI_p50398 | AZL_e00070 | –              | hor H |
| –            | putative sugar transporter, MFS family                                                 | AZOLI_p50231 | AZL_e03730 | –              | hor H |
| –            | putative TRAP-type mannitol/chloroaromatic compound transporter, periplasmic component | AZOLI_p30383 | AZL_c00200 | AZOBR_p1110126 | anc M |
| <i>rbsA1</i> | ribose ABC transporter, ATP-binding component                                          | AZOLI_p20585 | –          | –              | hor H |
| <i>rbsA2</i> | ribose ABC transporter, ATP-binding component                                          | AZOLI_p20714 | AZL_a02400 | –              | hor H |
| <i>rbsB</i>  | ribose ABC transporter, periplasmic component                                          | AZOLI_p20587 | –          | –              | hor H |
| <i>rbsB</i>  | ribose ABC transporter, periplasmic component                                          | –            | –          | AZOBR_p330089  | hor H |
| <i>rbsC1</i> | ribose ABC transporter, permease component                                             | AZOLI_p20586 | –          | –              | hor H |
| <i>rbsC</i>  | ribose ABC transporter, permease component                                             | –            | –          | AZOBR_p330090  | hor H |
| <i>rbsC2</i> | ribose ABC transporter, permease component                                             | AZOLI_p20713 | AZL_a02390 | –              | hor H |
| <i>gguA</i>  | sugar ABC transporter, ATP-binding component                                           | AZOLI_p50381 | AZL_e03670 | AZOBR_p440164  | hor H |
| –            | sugar ABC transporter, ATP-binding component (RbsA-like)                               | AZOLI_p50373 | AZL_e03590 | AZOBR_p440157  | hor H |
| <i>xylG</i>  | sugar ABC transporter, ATP-binding protein                                             | AZOLI_p20698 | AZL_b00040 | –              | hor H |
| –            | sugar ABC transporter, fused ATP-binding components (RbsA-like)                        | AZOLI_p20639 | AZL_b05830 | –              | anc L |
| –            | sugar ABC transporter, periplasmic component                                           | AZOLI_p50374 | AZL_e03600 | AZOBR_p440158  | hor H |
| <i>sbpA</i>  | sugar ABC transporter, periplasmic component                                           | AZOLI_p50380 | AZL_e03660 | AZOBR_p440163  | hor H |
| <i>gguB</i>  | sugar ABC transporter, permease component                                              | AZOLI_p50382 | AZL_e03680 | AZOBR_p440165  | hor H |
| –            | sugar ABC transporter, permease component (RbsC-like)                                  | AZOLI_p20640 | AZL_b05840 | –              | anc L |
| –            | sugar ABC transporter, permease component (RbsC-like)                                  | AZOLI_p20641 | AZL_b05850 | –              | anc L |
| –            | sugar ABC transporter, permease component (RbsC-like)                                  | AZOLI_p50371 | AZL_e03570 | AZOBR_p440155  | hor H |
| –            | sugar ABC transporter, permease component (RbsC-like)                                  | AZOLI_p50372 | AZL_e03580 | AZOBR_p440156  | hor H |
| –            | sugar permease of the major facilitator superfamily                                    | AZOLI_p50335 | AZL_e01340 | AZOBR_p220019  | hor H |

---

### Exopolysaccharide and lipopolysaccharide production [5]

|   |                     |            |            |              |       |
|---|---------------------|------------|------------|--------------|-------|
| – | glycosyltransferase | AZOLI_0037 | AZL_026460 | AZOBR_200027 | anc H |
|---|---------------------|------------|------------|--------------|-------|

|             |                                                                   |            |            |                |                        |
|-------------|-------------------------------------------------------------------|------------|------------|----------------|------------------------|
| _           | glycosyltransferase                                               | AZOLI_0056 | AZL_026330 | AZOBR_10419    | anc M                  |
| _           | putative glycosyltransferase                                      | AZOLI_0247 | AZL_003980 | AZOBR_40145    | hor H                  |
| <i>kdsB</i> | 3-deoxy-manno-octulosonate cytidyltransferase                     | AZOLI_0295 | AZL_004340 | AZOBR_40271    | anc M,anc H,anc M      |
| _           | putative polysaccharide export protein                            | AZOLI_0422 | AZL_005620 | AZOBR_160033   | anc M                  |
| _           | glycosyltransferase                                               | AZOLI_0524 | AZL_006390 | AZOBR_180018   | anc H                  |
| <i>kdtA</i> | 3-deoxy-D-manno-octulosonic-acid transferase                      | AZOLI_0529 | AZL_006410 | AZOBR_180020   | anc H,anc M,anc H      |
| <i>lpxK</i> | tetraacyldisaccharide 4'-kinase                                   | AZOLI_0530 | AZL_006420 | AZOBR_180021   | anc H                  |
| _           | lipid A biosynthesis acyltransferase                              | AZOLI_0531 | AZL_006430 | AZOBR_180022   | anc H                  |
| <i>lspA</i> | Lipoprotein signal peptidase                                      | AZOLI_0608 | AZL_007050 | AZOBR_70013    | anc H                  |
| _           | putative glycosyltransferase                                      | AZOLI_0610 | AZL_007090 | AZOBR_p1120031 | hor H                  |
| _           | putative galactosyltransferase                                    | AZOLI_0613 | AZL_007120 | AZOBR_p1120034 | hor H                  |
| _           | glycosyltransferase family 2                                      | AZOLI_0696 | AZL_008870 | AZOBR_200183   | anc L                  |
| <i>exbD</i> | biopolymer transport protein                                      | AZOLI_0830 | AZL_009820 | AZOBR_140015   | anc M                  |
| _           | putative glycosyltransferase, group 1                             | AZOLI_0943 | AZL_f00040 | AZOBR_p60058   | anc L,anc M,anc L      |
| _           | putative Polysaccharide deacetylase                               | AZOLI_0959 | AZL_010660 | AZOBR_180046   | anc M                  |
| <i>lpxA</i> | UDP-N-acetylglucosamine acyltransferase                           | AZOLI_1081 | AZL_016150 | AZOBR_100286   | anc H                  |
| <i>lpxB</i> | lipid-A-disaccharide synthase                                     | AZOLI_1083 | AZL_016130 | AZOBR_100288   | anc H                  |
| _           | protein of unknown function; putative Glycosyltransferase domain  | AZOLI_1127 | _          | _              | anc L                  |
| _           | glycosyltransferase                                               | AZOLI_1204 | AZL_013210 | AZOBR_110049   | anc L                  |
| _           | putative Lipopolysaccharide core biosynthesis glycosyltransferase | AZOLI_1206 | AZL_013230 | AZOBR_110051   | anc L                  |
| _           | Putative glycosyltransferase, group 2                             | AZOLI_1208 | AZL_013250 | AZOBR_110053   | anc L                  |
| _           | glycosyltransferase                                               | AZOLI_1257 | AZL_015840 | AZOBR_150118   | hor H                  |
| _           | putative glycosyltransferase                                      | AZOLI_1443 | AZL_017540 | _              | unassigned             |
| _           | glycosyltransferase family 2                                      | AZOLI_1475 | AZL_012160 | AZOBR_140212   | anc M                  |
| _           | putative glycosyltransferase                                      | AZOLI_1517 | AZL_011160 | AZOBR_p1140099 | hor H                  |
| _           | putative glycosyltransferase                                      | AZOLI_1877 | AZL_019300 | AZOBR_100092   | unassigned,hor M,anc M |
| <i>lpxC</i> | UDP-3-O-acyl N-acetylglucosamine deacetylase                      | AZOLI_2140 | AZL_020890 | AZOBR_180110   | anc H                  |
| <i>pssA</i> | phosphatidylserine synthase                                       | AZOLI_2161 | AZL_021060 | AZOBR_150144   | anc H                  |
| _           | Putative phospho-N-acetylmuramoyl-pentapeptide-transferase        | AZOLI_2266 | AZL_022170 | _              | anc H                  |
| _           | glycosyltransferase                                               | AZOLI_2267 | AZL_022180 | _              | hor H                  |
| _           | glycosyltransferase                                               | AZOLI_2268 | AZL_022190 | _              | anc L                  |
| _           | Putative sugar nucleotide epimerase/dehydratase                   | AZOLI_2269 | AZL_022200 | AZOBR_140021   | unassigned             |
| _           | Putative sugar nucleotide epimerase/dehydratase                   | AZOLI_2270 | AZL_022210 | AZOBR_140020   | anc H                  |
| <i>rfaD</i> | ADP-L-glycero-D-mannoheptose-6-epimerase                          | AZOLI_2285 | AZL_022310 | AZOBR_p440146  | anc H                  |
| _           | putative aminotransferase, StrS family                            | AZOLI_2320 | AZL_022560 | AZOBR_70138    | hor H                  |
| _           | glycosyltransferase                                               | AZOLI_2370 | AZL_023000 | AZOBR_40343    | anc M                  |



|             |                                                                           |              |            |                |                        |
|-------------|---------------------------------------------------------------------------|--------------|------------|----------------|------------------------|
| <i>lpxD</i> | UDP-3-O-(3-hydroxymyristoyl) glucosamine N-acyltransferase                | AZOLI_2520   | AZL_024330 | AZOBR_40170    | anc L                  |
| <i>rfaE</i> | fused heptose 7-phosphate kinase; heptose 1-phosphate adenylyltransferase | AZOLI_2623   | AZL_025050 | AZOBR_40288    | anc H                  |
| <i>kpsF</i> | arabinose 5-phosphate isomerase                                           | AZOLI_2876   | AZL_001050 | AZOBR_p1110041 | anc M                  |
| –           | glycosyl transferase                                                      | AZOLI_3150   | AZL_a11300 | AZOBR_p460041  | hor H                  |
| –           | glycosyltransferase                                                       | AZOLI_p10100 | AZL_a00380 | –              | anc M                  |
| –           | putative glycosyltransferase, group 1                                     | AZOLI_p10211 | –          | –              | hor H                  |
| <i>glmS</i> | Glucosamine-fructose-6-phosphate aminotransferase                         | AZOLI_p10413 | AZL_a07270 | AZOBR_140158   | anc H                  |
| –           | putative glycosyltransferase, group 1                                     | AZOLI_p10554 | AZL_a06960 | AZOBR_p1110156 | hor H                  |
| –           | putative glycosyltransferase, group 1                                     | AZOLI_p10555 | AZL_a06950 | AZOBR_p1110157 | hor H                  |
| –           | putative glycosyltransferase, family 2                                    | AZOLI_p10556 | AZL_a06940 | AZOBR_p1110158 | hor H                  |
| –           | putative O-antigen polymerase                                             | AZOLI_p10557 | AZL_a06930 | AZOBR_p1110159 | hor H                  |
| –           | Undecaprenyl-phosphate galactose phosphotransferase exoY-like             | AZOLI_p10558 | AZL_a06920 | AZOBR_p1110160 | hor H                  |
| –           | putative glycosyltransferase, WecB/TagA/CpsF family                       | AZOLI_p10565 | AZL_a06670 | AZOBR_p1110168 | hor H                  |
| –           | putative 3-deoxy-manno-octulosonate cytidyllyltransferase                 | AZOLI_p10577 | AZL_a06590 | AZOBR_p1160038 | anc M                  |
| –           | putative glycosyltransferase                                              | AZOLI_p10604 | AZL_a05520 | AZOBR_p140053  | unassigned             |
| –           | putative glycosyltransferase, group 2                                     | AZOLI_p10670 | –          | AZOBR_150003   | anc L                  |
| –           | glycosyl transferase                                                      | AZOLI_p10818 | AZL_a04300 | AZOBR_p1180007 | hor M,unassigned,hor H |
| –           | putative glycosyltransferase, group 1 (fragment)                          | AZOLI_p20132 | –          | –              | unassigned             |
| –           | Putative glycosyltransferase, group 2                                     | AZOLI_p20391 | AZL_a07140 | AZOBR_p210041  | hor H                  |
| <i>wgeD</i> | glycosyltransferase, group 1                                              | AZOLI_p20393 | AZL_a07120 | AZOBR_p210044  | hor H                  |
| –           | putative glycosyltransferase, group 1                                     | AZOLI_p20395 | AZL_a07100 | AZOBR_p210046  | hor H                  |
| –           | putative glycosyltransferase, group 1                                     | AZOLI_p30014 | –          | –              | hor H                  |
| –           | glycosyltransferase                                                       | AZOLI_p30192 | AZL_c00920 | AZOBR_p1120074 | hor H                  |
| –           | glycosyltransferase, family 9                                             | AZOLI_p30434 | AZL_c05270 | –              | anc H                  |
| –           | putative Glycosyl transferase, group 2                                    | AZOLI_p30536 | –          | –              | hor H                  |
| –           | glycosyltransferase, group 1                                              | AZOLI_p30542 | AZL_c02730 | –              | hor H,hor M            |
| –           | glycosyltransferase, group 1                                              | AZOLI_p30544 | AZL_c02710 | –              | unassigned             |
| –           | putative glycosyl transferase, group 1                                    | AZOLI_p30545 | AZL_c02700 | –              | hor H                  |
| –           | glycosyltransferase                                                       | AZOLI_p30547 | AZL_c02680 | –              | unassigned,hor H       |
| –           | glycosyltransferase, group 1                                              | AZOLI_p30548 | AZL_c02670 | –              | unassigned             |
| –           | putative UDP-Glycosyltransferase/glycogen phosphorylase                   | AZOLI_p40090 | AZL_d04940 | –              | anc L,unassigned       |
| –           | glycosyltransferase                                                       | AZOLI_p40091 | AZL_d04950 | –              | unassigned             |
| –           | glycosyltransferase, group 1                                              | AZOLI_p40092 | AZL_d04960 | –              | unassigned             |
| –           | putative glycosyltransferase                                              | AZOLI_p40094 | AZL_d04980 | –              | unassigned             |
| <i>rfaC</i> | heptosyltransferase I                                                     | AZOLI_p40151 | AZL_d00260 | AZOBR_100043   | anc H                  |
| –           | putative Lipid A core-O-antigen ligase                                    | AZOLI_p40152 | AZL_d00270 | AZOBR_100042   | anc H                  |

|              |                                                      |              |            |                |                             |
|--------------|------------------------------------------------------|--------------|------------|----------------|-----------------------------|
| <i>rkpK1</i> | UDP-glucose 6-dehydrogenase                          | AZOLI_p40164 | AZL_d00320 | AZOBR_p60068   | anc H                       |
| <i>exoC</i>  | phosphomannomutase                                   | AZOLI_p40165 | AZL_d00330 | AZOBR_p60069   | anc M                       |
| <i>exoY</i>  | undecaprenyl-phosphate galactose phosphotransferase  | AZOLI_p40338 | AZL_d02010 | AZOBR_p1130130 | anc L                       |
| _            | putative oligosaccharide repeat unit transporter     | AZOLI_p40383 | AZL_d02540 | AZOBR_40159    | hor H                       |
| _            | UDP-glucose 6-dehydrogenase                          | AZOLI_p40385 | AZL_d02530 | AZOBR_40158    | unassigned                  |
| _            | nucleoside-diphosphate-sugar epimerase               | AZOLI_p40386 | AZL_d02520 | AZOBR_40157    | hor H                       |
| <i>wcaG</i>  | GDP-L-fucose synthetase                              | AZOLI_p40387 | AZL_d02510 | AZOBR_40156    | hor H                       |
| _            | glycosyl transferase                                 | AZOLI_p40388 | AZL_d02500 | AZOBR_40155    | unassigned,hor M,hor M      |
| _            | glycosyltransferase                                  | AZOLI_p40389 | AZL_d02490 | AZOBR_40154    | hor H                       |
| _            | glycosyltransferase                                  | AZOLI_p40390 | AZL_d02480 | AZOBR_40152    | hor H                       |
| _            | glycosyltransferase                                  | AZOLI_p50171 | AZL_e02810 | AZOBR_110068   | anc L                       |
| _            | putative glycosyltransferase, family 2               | AZOLI_p50173 | AZL_e02830 | AZOBR_110066   | unassigned,unassigned,anc L |
| _            | putative glycosyltransferase, group 1                | AZOLI_p50346 | _          | AZOBR_p340024  | hor M                       |
| _            | putative glycosyltransferase                         | AZOLI_p60005 | AZL_f01540 | AZOBR_p170003  | anc L                       |
| <i>fcI1</i>  | GDP-L-fucose synthetase                              | AZOLI_p60007 | AZL_f01640 | AZOBR_p60012   | anc M                       |
| <i>fcI2</i>  | GDP-L-fucose synthetase                              | AZOLI_p60017 | _          | _              | unassigned                  |
| <i>gmhA</i>  | phosphoheptose isomerase                             | AZOLI_p60053 | AZL_f01620 | AZOBR_p60112   | hor M,unassigned,hor H      |
| _            | putative glycosyltransferase                         | AZOLI_p60056 | _          | _              | unassigned                  |
| _            | putative glycosyltransferase                         | AZOLI_p60057 | AZL_f01670 | _              | hor H                       |
| _            | UDP-N-acetylglucosamine 2-epimerase                  | AZOLI_p60088 | _          | _              | anc L                       |
| <i>rtbF</i>  | glucose-1-phosphate cytidyltransferase               | AZOLI_p60139 | _          | _              | hor H                       |
| _            | glycosyltransferase                                  | AZOLI_p60158 | AZL_f00160 | AZOBR_p60034   | hor H                       |
| _            | glycosyltransferase                                  | AZOLI_p60174 | _          | _              | anc M                       |
| <i>rkpK2</i> | UDP-glucose 6-dehydrogenase                          | AZOLI_p60193 | _          | _              | anc M                       |
| <i>rfaA</i>  | glucose-1-phosphate thymidyltransferase              | AZOLI_p60195 | AZL_f01810 | _              | hor H                       |
| <i>rfaD</i>  | dTDP-4-dehydrorhamnose reductase                     | AZOLI_p60196 | AZL_f01800 | AZOBR_p60006   | anc L,anc L,unassigned      |
| <i>rfaC</i>  | dTDP-4,deoxyrhamnose 3,5 epimerase                   | AZOLI_p60198 | AZL_f01780 | _              | anc L,anc M                 |
| _            | putative glycosyltransferase, family 2               | AZOLI_p60199 | _          | _              | anc L                       |
| _            | NDP-N-acetyl-D-galactosaminuronic acid dehydrogenase | AZOLI_p60211 | AZL_f01240 | _              | hor H                       |
| _            | glycosyltransferase                                  | AZOLI_p60238 | AZL_f01100 | _              | hor H                       |
| _            | glycosyltransferase, family 2                        | AZOLI_p60242 | _          | _              | anc L                       |
| <i>gmd1</i>  | GDP-mannose 4,6-dehydratase                          | AZOLI_p60265 | AZL_f01050 | _              | hor M,hor H                 |
| <i>gmd2</i>  | GDP-mannose 4,6-dehydratase (fragment)               | AZOLI_p60266 | _          | _              | anc L                       |
| _            | glycosyltransferase                                  | _            | AZL_d02410 | _              | anc L                       |
| _            | glycosyltransferase                                  | _            | AZL_e00440 | _              | anc L                       |
| _            | glycosyltransferase, group 1                         | _            | AZL_e03440 | _              | hor H                       |

|             |                                                                   |   |            |                |            |
|-------------|-------------------------------------------------------------------|---|------------|----------------|------------|
| —           | glycosyltransferase, group 1                                      | — | AZL_e03450 | —              | anc L      |
| <i>fcl</i>  | GDP-L-fucose synthase                                             | — | AZL_f00440 | —              | hor H      |
| <i>gmd</i>  | GDP-mannose 4,6-dehydratase                                       | — | AZL_f01060 | —              | anc L      |
| —           | putative glycosyltransferase                                      | — | —          | AZOBR_100002   | anc L      |
| —           | glycosyltransferase, group 1                                      | — | —          | AZOBR_100004   | anc L      |
| —           | putative glycosyltransferase                                      | — | —          | AZOBR_10433    | anc L      |
| —           | putative glycosyltransferase                                      | — | —          | AZOBR_10436    | anc L      |
| —           | glycosyltransferase, group 1                                      | — | —          | AZOBR_10437    | anc L      |
| —           | glycosyltransferase, group 1                                      | — | —          | AZOBR_10439    | anc L      |
| —           | putative glycosyltransferase, group 4                             | — | —          | AZOBR_140022   | anc H      |
| —           | putative glycosyltransferase, group 1                             | — | —          | AZOBR_140023   | anc L      |
| —           | putative glycosyltransferase, group 2                             | — | —          | AZOBR_140059   | hor H      |
| —           | putative glycosyltransferase, group 2                             | — | —          | AZOBR_40077    | hor H      |
| —           | putative glycosyltransferase, group 2                             | — | —          | AZOBR_40146    | hor H      |
| —           | glycosyltransferase, group 2 (fragment)                           | — | —          | AZOBR_70072    | unassigned |
| —           | glycosyltransferase protein                                       | — | —          | AZOBR_70089    | anc L      |
| —           | putative glycosyltransferase, WecB/TagA/CpsF family (fragment)    | — | —          | AZOBR_p1120001 | hor H      |
| —           | putative glycosyltransferase, group 1                             | — | —          | AZOBR_p170001  | anc M      |
| —           | putative glycosyltransferase                                      | — | —          | AZOBR_p170061  | hor M      |
| —           | glycosyltransferase, group 1                                      | — | —          | AZOBR_p210162  | anc L      |
| —           | glycosyltransferase, group 1 (fragment)                           | — | —          | AZOBR_p210174  | hor H      |
| —           | putative glycosyltransferase                                      | — | —          | AZOBR_p210176  | hor H      |
| <i>exoP</i> | Succinoglycan biosynthesis transport protein ExoP                 | — | —          | AZOBR_p230002  | anc M      |
| —           | glycosyltransferase                                               | — | —          | AZOBR_p230009  | hor H      |
| —           | glycosyltransferase, group 2                                      | — | —          | AZOBR_p310019  | hor H      |
| —           | glycosyltransferase, group 2                                      | — | —          | AZOBR_p310022  | hor H      |
| —           | glycosyltransferase                                               | — | —          | AZOBR_p310280  | anc L      |
| —           | glycosyltransferase, family 51                                    | — | —          | AZOBR_p440063  | hor H      |
| <i>gmd</i>  | GDP-mannose 4,6-dehydratase                                       | — | —          | AZOBR_p60001   | hor H      |
| —           | putative glycosyltransferase                                      | — | —          | AZOBR_p60002   | hor H      |
| —           | putative glycosyltransferase                                      | — | —          | AZOBR_p60003   | anc L      |
| <i>rfbA</i> | glucose-1-phosphate thymidyltransferase                           | — | —          | AZOBR_p60007   | anc M      |
| —           | putative glycosyltransferase                                      | — | —          | AZOBR_p60013   | hor L      |
| <i>wbpY</i> | glycosyltransferase, group 1                                      | — | —          | AZOBR_p60014   | hor H      |
| <i>gmd</i>  | GDP-D-mannose dehydratase, NAD(P)-binding, colanic acid synthesis | — | —          | AZOBR_p60015   | hor L      |
| —           | putative glycosyltransferase, group 2                             | — | —          | AZOBR_p60021   | hor H      |

|             |                                                                                 |   |   |              |       |
|-------------|---------------------------------------------------------------------------------|---|---|--------------|-------|
| –           | putative glycosyltransferase, group 1                                           | – | – | AZOBR_p60029 | anc L |
| –           | putative glycosyltransferase                                                    | – | – | AZOBR_p60031 | hor L |
| –           | putative glycosyl transferase, group 2 (fragment)                               | – | – | AZOBR_p60039 | hor H |
| –           | putative glycosyltransferase                                                    | – | – | AZOBR_p60049 | anc L |
| –           | putative glycosyltransferase                                                    | – | – | AZOBR_p60053 | hor L |
| –           | putative glycosyltransferase                                                    | – | – | AZOBR_p60082 | anc L |
| –           | putative glycosyltransferase                                                    | – | – | AZOBR_p60084 | anc L |
| –           | putative glycosyltransferase, group 1                                           | – | – | AZOBR_p60089 | hor L |
| –           | glycosyltransferase, group 1                                                    | – | – | AZOBR_p60090 | hor L |
| –           | putative glycosyltransferase, group 1                                           | – | – | AZOBR_p60096 | hor H |
| –           | putative glycosyltransferase, group 1                                           | – | – | AZOBR_p60097 | hor H |
| –           | putative glycosyltransferase, group 1                                           | – | – | AZOBR_p60109 | hor L |
| <i>rfaD</i> | ADP-L-glycero-D-mannoheptose-6-epimerase                                        | – | – | AZOBR_p60110 | anc H |
| <i>rfaE</i> | bifunctional protein RfaE (Involved in ADP-L-glycero-D-manno-heptose synthesis) | – | – | AZOBR_p60111 | anc H |
| –           | glycosyltransferase, group 1                                                    | – | – | AZOBR_p60119 | hor H |
| –           | glycosyltransferase, group 2                                                    | – | – | AZOBR_p60120 | anc L |
| –           | putative glycosyltransferase, group 1                                           | – | – | AZOBR_p60125 | hor L |

### Drug resistance [6]

|              |                                                               |              |            |                |                   |
|--------------|---------------------------------------------------------------|--------------|------------|----------------|-------------------|
| <i>ermE</i>  | multidrug transporter, SMR superfamily                        | AZOLI_0213   | AZL_025680 | AZOBR_200157   | anc L             |
| <i>pecM</i>  | permease of the drug/metabolite transporter (DMT) superfamily | AZOLI_0927   | AZL_010530 | –              | hor H             |
| –            | putative multidrug-efflux transporter, MFS family             | AZOLI_0988   | AZL_010850 | AZOBR_150101   | hor H             |
| –            | multidrug efflux system, subunit A (AcrB family) (fragment)   | –            | –          | AZOBR_p110066  | unassigned        |
| <i>mdtA2</i> | multidrug efflux system, subunit A (AcrB family)              | AZOLI_1033   | AZL_017630 | –              | anc L             |
| <i>mdtB2</i> | multidrug efflux system, subunit B (AcrB family)              | AZOLI_1034   | AZL_017620 | AZOBR_p110065  | anc L             |
| <i>sugE</i>  | multidrug transporter, SMR superfamily                        | AZOLI_1465   | AZL_012220 | AZOBR_140035   | hor M,hor M,hor H |
| –            | multidrug efflux transporter (NoIG-like)                      | AZOLI_1522   | AZL_011100 | AZOBR_p110062  | hor H             |
| –            | putative cation/multidrug efflux transporter, RND family      | AZOLI_2099   | –          | AZOBR_p50027   | hor H             |
| –            | putative efflux transporter, RND family                       | AZOLI_2100   | –          | AZOBR_p50026   | hor H             |
| –            | putative multidrug efflux transporter                         | AZOLI_2102   | –          | AZOBR_p50024   | unassigned        |
| –            | multidrug efflux transporter, MSF family                      | AZOLI_2749   | AZL_002340 | AZOBR_40226    | hor H             |
| –            | multidrug resistance efflux pump (ErmK-like)                  | AZOLI_p10652 | AZL_a05380 | AZOBR_p1130047 | anc M             |
| –            | multidrug resistance efflux pump (EmrB-like)                  | AZOLI_p10653 | AZL_a05390 | AZOBR_p1130049 | anc M,anc M,anc H |
| –            | multidrug efflux transporter                                  | AZOLI_p10814 | AZL_a04330 | AZOBR_p1180011 | anc L,anc L,anc M |
| –            | putative RND efflux transporter, MFP subunit                  | AZOLI_p10815 | AZL_a04320 | AZOBR_p1180010 | anc L             |
| –            | RND efflux transporter, AcrB-like component                   | AZOLI_p10826 | –          | –              | anc L             |
| –            | RND efflux transporter, MFP subunit                           | AZOLI_p10827 | –          | AZOBR_p310207  | anc L             |

|              |                                                                     |              |            |                |                   |
|--------------|---------------------------------------------------------------------|--------------|------------|----------------|-------------------|
| <i>acrA2</i> | multidrug efflux transporter, AcrA component                        | AZOLI_p20171 | –          | –              | hor H             |
| <i>acrB2</i> | multidrug efflux transporter, AcrB component                        | AZOLI_p20172 | –          | –              | hor H             |
| <i>oprM</i>  | multidrug efflux transporter, OprM component                        | AZOLI_p20173 | –          | –              | anc L             |
| –            | putative multidrug resistance membrane protein (MFP family)         | AZOLI_p30050 | AZL_a10641 | AZOBR_p1120069 | hor H             |
| –            | putative efflux transporter permease; fusaric acid resistance pump  | AZOLI_p30051 | AZL_a10650 | AZOBR_p1120070 | hor H             |
| –            | putative multidrug efflux transporter, RND family, MFP subunit      | AZOLI_p30309 | AZL_b06260 | AZOBR_p330150  | hor H             |
| –            | putative multidrug efflux transporter, <i>acrB/acrD/acrF</i> family | AZOLI_p30310 | AZL_b06270 | AZOBR_p330151  | hor H             |
| –            | putative multiple antibiotic resistance protein (MarC-like)         | AZOLI_p30514 | AZL_c04720 | AZOBR_p280101  | hor H             |
| <i>mdtC</i>  | multidrug efflux system, subunit C (AcrB family)                    | AZOLI_p40176 | AZL_d04480 | –              | hor H,hor M       |
| <i>mdtB1</i> | multidrug efflux system, subunit B (AcrB family)                    | AZOLI_p40177 | AZL_d04470 | –              | anc L             |
| <i>mdtA1</i> | multidrug efflux system, subunit A (AcrB family)                    | AZOLI_p40178 | AZL_d04460 | –              | anc L             |
| –            | multiple antibiotic resistance protein (MarC-like)                  | AZOLI_p40256 | AZL_d01520 | AZOBR_p470041  | hor L             |
| –            | putative tetracycline-efflux transporter                            | AZOLI_p50089 | AZL_e02360 | –              | hor M,hor H       |
| –            | drug resistance transporter, <i>Bcr/CflA</i> subfamily              | AZOLI_p50221 | AZL_e02530 | –              | hor H             |
| <i>acrB1</i> | multidrug efflux transporter, AcrB component                        | AZOLI_p50393 | AZL_e00110 | AZOBR_p420021  | anc L,anc M,anc L |
| <i>acrA1</i> | multidrug efflux transporter, AcrA component                        | AZOLI_p50394 | AZL_e00100 | AZOBR_p420020  | anc M             |
| –            | putative RND efflux transporter, MFP subunit                        | AZOLI_p50426 | AZL_d02690 | AZOBR_p440178  | hor H             |
| <i>mexB</i>  | multidrug efflux transporter (RND family)                           | AZOLI_p50427 | AZL_d02700 | AZOBR_p440179  | hor H             |

### Glycoside hydrolase activity [7]

|             |                                               |              |            |                |                   |
|-------------|-----------------------------------------------|--------------|------------|----------------|-------------------|
| –           | 4-alpha-glucanotransferase; (glyco_hydro_77)  | AZOLI_p10625 | AZL_a05620 | AZOBR_p140015  | anc L,anc M,anc L |
| <i>malQ</i> | 4- $\alpha$ -glucanotransferase (EC 2.4.1.25) | AZOLI_p10107 | AZL_a00430 | AZOBR_140112   | anc M             |
| –           | alpha-amylase                                 | AZOLI_1942   | –          | AZOBR_40417    | hor H             |
| –           | alpha-amylase                                 | AZOLI_p10102 | AZL_a00400 | AZOBR_140107   | anc L,anc M,anc M |
| –           | alpha-amylase                                 | AZOLI_p10624 | AZL_a05610 | AZOBR_p140016  | unassigned        |
| –           | alpha-amylase                                 | AZOLI_p30209 | AZL_c02820 | AZOBR_100146   | anc L             |
| –           | alpha-amylase                                 | –            | –          | AZOBR_190016   | hor H             |
| –           | alpha-amylase                                 | –            | –          | AZOBR_p280055  | hor H             |
| –           | alpha-amylase                                 | –            | –          | AZOBR_p310298  | hor H             |
| <i>melA</i> | alpha-galactosidase (melibiase) (EC 3.2.1.22) | AZOLI_p50318 | AZL_e01400 | AZOBR_p280123  | anc M             |
| –           | alpha-glucosidase (glyco_hydro_31)            | –            | AZL_e03400 | –              | hor H             |
| –           | alpha-glucosidase (glyco_hydro_31)            | –            | –          | AZOBR_p310247  | hor H             |
| –           | cellulase, endogluconase (glyco_hydro_5)      | AZOLI_p10561 | AZL_a06890 | AZOBR_p1110164 | hor H             |
| –           | cellulase, endogluconase (glyco_hydro_5)      | –            | –          | AZOBR_p470008  | hor H             |
| –           | cellulase, endogluconase (glyco_hydro_5)      | AZOLI_p40099 | AZL_d05040 | –              | hor H             |
| –           | cellulase, endogluconase (glyco_hydro_5)      | –            | –          | AZOBR_150049   | hor H             |
| –           | cellulase, endogluconase (glyco_hydro_8)      | AZOLI_p30425 | AZL_c05150 | –              | anc L,unassigned  |

|              |                                                          |              |            |                |                        |
|--------------|----------------------------------------------------------|--------------|------------|----------------|------------------------|
| –            | endoxyalanase (glyco_hydro_10)                           | AZOLI_p10563 | AZL_a06690 | AZOBR_p1110166 | hor H                  |
| –            | endoxyalanase (glyco_hydro_10)                           | –            | –          | AZOBR_p310014  | hor H                  |
| –            | glucoamylase (glyco_hydro_15)                            | –            | –          | AZOBR_p210150  | hor M                  |
| <i>glgX1</i> | glycogen debranching enzyme (EC 3.2.1.-)                 | AZOLI_p10105 | AZL_a00410 | AZOBR_140110   | anc L                  |
| <i>glgX2</i> | glycogen debranching enzyme (EC 3.2.1.-)                 | AZOLI_p30385 | AZL_c00180 | AZOBR_p1120007 | unassigned,anc L,anc L |
| –            | hypothetical glycoside hydrolase family 63               | –            | –          | AZOBR_p310299  | hor H                  |
| –            | Licheninase (glyco_hydro_16)                             | AZOLI_p10648 | AZL_a05340 | –              | hor H                  |
| –            | Lysozyme (glyco_hydro_25)                                | AZOLI_p40527 | AZL_d03580 | –              | anc L                  |
| <i>treZ</i>  | malto-oligosyltrehalose trehalohydrolase (EC 3.2.1.141)  | AZOLI_0953   | –          | AZOBR_180052   | anc L                  |
| <i>treS</i>  | trehalose synthase                                       | AZOLI_p10101 | AZL_a00390 | AZOBR_140106   | anc M                  |
| –            | unknown endogluconase (glyco_hydro_12)                   | –            | –          | AZOBR_p440082  | hor H                  |
| –            | $\alpha$ -glucosidase (EC 3.2.1.20)                      | AZOLI_p10598 | AZL_a06410 | AZOBR_p110052  | anc L                  |
| –            | $\beta$ - N-acetylhexosaminidase (glyco_hydro_3)         | AZOLI_p10769 | AZL_a04490 | –              | anc M,anc L            |
| –            | $\beta$ - N-acetylhexosaminidase (glyco_hydro_3)         | –            | –          | AZOBR_p120114  | anc L                  |
| –            | $\beta$ -(1-6) glucans synthase (glyco_hydro_17)         | AZOLI_p40646 | AZL_d00810 | AZOBR_10535    | anc M                  |
| –            | $\beta$ -glucosidase /cellobiase                         | AZOLI_p50295 | AZL_e01630 | AZOBR_p140078  | anc M                  |
| –            | $\beta$ -glucosidase /cellobiase                         | AZOLI_p50317 | AZL_e01410 | AZOBR_p280124  | anc M                  |
| –            | $\beta$ -glucosidase /cellobiase (glyco_hydro_1)         | AZOLI_p30407 | AZL_c00120 | AZOBR_p280134  | anc M                  |
| –            | $\beta$ -glucosidase /cellobiase (glyco_hydro_1)         | AZOLI_p40351 | AZL_d02120 | AZOBR_p280136  | anc M                  |
| –            | $\beta$ -glucosidase-related glycosidase (glyco_hydro_3) | –            | AZL_c03570 | –              | anc L                  |
| –            | $\beta$ -glucuronidase                                   | –            | –          | AZOBR_p310253  | hor H                  |
| –            | $\beta$ -glucuronidase (glyco_hydro_2)                   | –            | –          | AZOBR_p310252  | hor H                  |
| –            | $\beta$ -mannosidase (glyco_hydro_2)                     | AZOLI_p50309 | AZL_e01490 | AZOBR_p270141  | hor H                  |

### Hormone synthesis [8]

|             |                                                                               |              |            |               |                                 |
|-------------|-------------------------------------------------------------------------------|--------------|------------|---------------|---------------------------------|
| <i>ipdC</i> | indole pyruvate decarboxylase                                                 | –            | –          | AZOBR_40354   | anc L                           |
| <i>nthA</i> | nitrile hydratase (conversion of indole-3-acetonitrile to indole-3-acetamide) | –            | –          | AZOBR_p310181 | unassigned                      |
| <i>nthB</i> | nitrile hydratase                                                             | –            | –          | AZOBR_p310180 | hor M                           |
| –           | indole acetic acid transacetylase                                             | AZOLI_1094   | AZL_016030 | AZOBR_100302  | anc L,<br>unassigned,unassigned |
| <i>acdS</i> | ACC deaminase                                                                 | AZOLI_p20559 | AZL_b04170 | –             | hor H                           |
| <i>acdR</i> | Lrp regulator of ACC deaminase                                                | AZOLI_p20560 | AZL_b04180 | –             | hor H                           |
| <i>nirK</i> | copper-containing nitrite reductase                                           | AZOLI_p30082 | AZL_c02030 | AZOBR_p310167 | hor H                           |
| <i>nahG</i> | salicylate 1-monooxygenase (EC 1.14.13.1)                                     | AZOLI_p20435 | –          | –             | hor M                           |
| –           | putative salicylate 1-monooxygenase (EC 1.14.13.1)                            | –            | –          | AZOBR_p480008 | hor H                           |

### Methylamine degradation [9]

|             |                                        |   |            |   |       |
|-------------|----------------------------------------|---|------------|---|-------|
| <i>mgsA</i> | N-methyl-glutamate (NMG) dehydrogenase | – | AZL_a09510 | – | hor M |
|-------------|----------------------------------------|---|------------|---|-------|

|             |                                        |   |            |   |            |
|-------------|----------------------------------------|---|------------|---|------------|
| <i>mgsB</i> | N-methyl-glutamate (NMG) dehydrogenase | – | AZL_a09520 | – | anc L      |
| <i>mgsC</i> | N-methyl-glutamate (NMG) dehydrogenase | – | AZL_a09530 | – | hor H      |
| <i>gmas</i> | γ-glutamylmethylamide (GMA) synthetase | – | AZL_a09540 | – | anc L      |
| <i>mgdA</i> | N-methyl-glutamate (NMG) synthase      | – | AZL_a09550 | – | unassigned |
| <i>mgdB</i> | N-methyl-glutamate (NMG) synthase      | – | AZL_a09560 | – | anc L      |
| <i>mgdC</i> | N-methyl-glutamate (NMG) synthase      | – | AZL_a09570 | – | hor H      |
| <i>mgdD</i> | N-methyl-glutamate (NMG) synthase      | – | AZL_a09580 | – | anc L      |

---

### Nitrogen fixation and H2 recycling [10, 11]

|              |                                                           |            |            |               |                        |
|--------------|-----------------------------------------------------------|------------|------------|---------------|------------------------|
| <i>fixA</i>  | electron transfer flavoprotein beta subunit               | AZOLI_0535 | AZL_006470 | AZOBR_70108   | anc M                  |
| <i>fixB</i>  | electron transfer flavoprotein alpha chain                | AZOLI_0536 | AZL_006480 | AZOBR_70107   | anc M                  |
| <i>fixC</i>  | flavoprotein-ubiquinone oxidoreductase                    | AZOLI_0537 | AZL_006490 | AZOBR_70106   | unassigned,anc M,anc M |
| <i>fixD</i>  | 4Fe-4S ferredoxin                                         | AZOLI_0538 | AZL_006500 | AZOBR_70105   | unassigned             |
| <i>nifW</i>  | nitrogenase-stabilizing/protective protein                | AZOLI_0541 | AZL_006520 | AZOBR_70109   | hor M                  |
| <i>nifP1</i> | serine acetyltransferase                                  | AZOLI_0542 | AZL_006530 | AZOBR_70110   | hor H                  |
| <i>nifV</i>  | homocitrate synthase                                      | AZOLI_0543 | AZL_006540 | AZOBR_70111   | anc H                  |
| <i>nifS2</i> | cysteine desulfurase                                      | AZOLI_0544 | AZL_006550 | AZOBR_70112   | hor L                  |
| <i>nifU</i>  | Fe-S cluster assembly protein                             | AZOLI_0545 | AZL_006560 | AZOBR_70113   | hor M                  |
| <i>nifQ2</i> | nitrogenase iron-molybdenum cofactor biosynthesis protein | –          | –          | AZOBR_70116   | anc L                  |
| <i>fdxB</i>  | ferredoxin III ( <i>nif</i> specific)                     | AZOLI_0669 | AZL_007610 | AZOBR_70117   | hor H,hor H,anc L      |
| <i>nifX</i>  | nitrogenase molybdenum-iron protein                       | AZOLI_0672 | AZL_007640 | AZOBR_70120   | hor H                  |
| <i>nifN</i>  | nitrogenase reductase-associated ferredoxin               | AZOLI_0673 | AZL_007650 | AZOBR_70121   | hor H                  |
| <i>nifE</i>  | nitrogenase molybdenum-cofactor biosynthesis protein      | AZOLI_0674 | AZL_007660 | AZOBR_70122   | hor H                  |
| <i>nifK</i>  | nitrogenase molybdenum-iron protein beta chain            | AZOLI_0679 | AZL_007690 | AZOBR_70126   | anc L,anc L,unassigned |
| <i>nifD</i>  | nitrogenase molybdenum-iron protein alpha chain           | AZOLI_0680 | AZL_007700 | AZOBR_70127   | hor L,hor L,hor M      |
| <i>nifH</i>  | nitrogenase iron protein, dinitrogenase reductase         | AZOLI_0681 | AZL_007710 | AZOBR_70128   | unassigned             |
| <i>draT</i>  | ADP-ribosyl-[dinitrogenase reductase]transferase          | AZOLI_0684 | AZL_007730 | AZOBR_70132   | anc H                  |
| <i>draG</i>  | ADP-ribosyl-[dinitrogenase reductase]hydrolase            | AZOLI_0685 | AZL_007740 | AZOBR_70133   | anc H                  |
| <i>ntrB</i>  | sensor histidine kinase involved in nitrogen fixation     | AZOLI_1342 | AZL_015080 | AZOBR_p110009 | anc H                  |
| <i>ntrC</i>  | sensor histidine kinase involved in nitrogen fixation     | AZOLI_1343 | AZL_015070 | AZOBR_p110010 | anc H                  |
| <i>ntrY</i>  | transcriptional regulator involved in nitrogen fixation   | AZOLI_1344 | AZL_015060 | AZOBR_p110011 | anc H                  |
| <i>glnB</i>  | nitrogen regulatory protein P-II 2                        | AZOLI_1865 | AZL_019210 | AZOBR_100230  | anc H                  |
| <i>glnA</i>  | glutamine synthase                                        | AZOLI_1867 | AZL_019220 | AZOBR_100228  | anc H                  |
| <i>glnD</i>  | [Protein-P-II]urydyltransferase                           | AZOLI_1713 | AZL_017160 | AZOBR_10466   | anc H                  |
| <i>nifA</i>  | Nif-specific transcriptional regulator                    | AZOLI_2308 | AZL_022450 | AZOBR_70150   | anc M                  |
| <i>nifB</i>  | nitrogenase iron-molybdenum cofactor biosynthesis protein | AZOLI_2311 | AZL_022470 | AZOBR_70147   | hor H                  |
| <i>fdxN</i>  | ferredoxin                                                | AZOLI_2312 | AZL_022480 | AZOBR_70146   | hor M,hor M,anc L      |

|                                |                                                        |              |            |                |                   |
|--------------------------------|--------------------------------------------------------|--------------|------------|----------------|-------------------|
| <i>nifZ1</i>                   | nitrogenase P-cluster assembly                         | AZOLI_2315   | AZL_022510 | AZOBR_70143    | anc M             |
| <i>nifZ2</i>                   | nitrogenase P-cluster assembly                         | AZOLI_2316   | AZL_022520 | AZOBR_70142    | hor H             |
| <i>nifS1</i>                   | cysteine desulfurase                                   | AZOLI_2317   | AZL_022530 | –              | hor H             |
| –                              | fragment of cysteine desulfurylase                     | –            | –          | AZOBR_70141    | hor H             |
| <i>nifT</i>                    | NifT/FixU nitrogen fixation protein                    | AZOLI_2318   | AZL_022540 | –              | anc M,anc L       |
| <i>nifQ1</i>                   | nitrogenase iron-molybdenum cofactor synthesis protein | AZOLI_0980   | AZL_010780 | AZOBR_09008    | anc H             |
| <i>nifP2</i>                   | serine acetyltransferase                               | AZOLI_1974   | AZL_020070 | AZOBR_70185    | anc H             |
| <i>fixK</i>                    | nitrogen fixation regulation protein, Crp/FNR family   | AZOLI_2692   | AZL_003420 | AZOBR_10251    | anc H             |
| <i>fixS</i>                    | cytochrome ccb3 oxidase maturation protein             | AZOLI_2693   | AZL_003410 | AZOBR_10252    | anc M             |
| <i>fixI</i>                    | cation-exporting ATPase                                | AZOLI_2694   | AZL_003400 | AZOBR_10253    | anc H             |
| <i>fixH</i>                    | integral membrane protein linked to a cation pump      | AZOLI_2695   | AZL_003390 | AZOBR_10254    | anc H             |
| <i>fixG</i>                    | 4Fe-4S ferredoxin, iron-sulfur binding                 | AZOLI_1705   | AZL_016980 | AZOBR_10255    | anc H             |
| <i>cytP</i>                    | cytochrome C oxidase, CytP subunit                     | AZOLI_2697   | AZL_003380 | AZOBR_10256    | anc M             |
| <i>cytQ</i>                    | cytochrome c oxidase CytQ subunit                      | AZOLI_2698   | AZL_003370 | AZOBR_10257    | hor H             |
| <i>cytO</i>                    | cytochrome C oxidase, CytO subunit                     | AZOLI_2699   | AZL_003360 | AZOBR_10258    | anc M,anc M,anc L |
| <i>cytN</i>                    | cytochrome C oxidase, CytN subunit                     | AZOLI_2700   | AZL_003350 | AZOBR_10259    | anc H             |
| <i>rpoN</i><br>( <i>ntrA</i> ) | RNA polymerase sigma-54 factor                         | AZOLI_2872   | AZL_001090 | AZOBR_p1110045 | anc H             |
| <i>gltD</i>                    | glutamate synthase, beta subunit                       | AZOLI_2889   | AZL_001000 | AZOBR_p1110035 | anc M             |
| <i>gltB</i>                    | glutamate synthase, alpha subunit                      | AZOLI_2890   | AZL_000990 | AZOBR_p1110033 | anc H             |
| <i>glnZ</i>                    | nitrogen regulatory protein P-II 1                     | AZOLI_p40634 | AZL_d00720 | AZOBR_10503    | anc H             |
| <i>vnfE</i>                    | nitrogenase cofactor synthesis protein                 | –            | –          | AZOBR_p350011  | hor H             |
| <i>vnfN</i>                    | nitrogenase cofactor synthesis protein                 | –            | –          | AZOBR_p350012  | hor H             |
| <i>vnfX</i>                    | vanadium nitrogenase protein                           | –            | –          | AZOBR_p350013  | hor H             |
| <i>vnfA</i>                    | vanadium nitrogenase transcriptional regulator         | –            | –          | AZOBR_p350016  | anc L             |
| <i>vnfD</i>                    | nitrogenase vanadium-iron protein alpha chain          | –            | –          | AZOBR_p350020  | unassigned        |
| <i>vnfG</i>                    | vanadium dinitrogenase delta subunit                   | –            | –          | AZOBR_p350021  | unassigned        |
| <i>vnfK</i>                    | nitrogenase vanadium-iron protein, VnfK subunit        | –            | –          | AZOBR_p350022  | unassigned        |
| <i>vnfY</i>                    | nitrogen fixation-related protein                      | –            | –          | AZOBR_p350024  | anc M             |
| <i>hupT</i>                    | two-component sensor histidine kinase                  | AZOLI_p30053 | AZL_a10670 | –              | unassigned        |
| <i>hupU</i>                    | uptake hydrogenase accessory protein                   | AZOLI_p30054 | AZL_a10680 | –              | hor H             |
| <i>hupV</i>                    | uptake hydrogenase accessory protein                   | AZOLI_p30055 | AZL_a10690 | –              | unassigned        |
| <i>hupD</i>                    | hydrogenase expression/formation protein               | AZOLI_p30060 | AZL_c01910 | –              | hor H             |
| <i>hupF</i>                    | hydrogenase expression/formation protein               | AZOLI_p30061 | AZL_c01920 | –              | unassigned        |
| <i>hupG</i>                    | hydrogenase expression/formation protein               | AZOLI_p30062 | AZL_c01930 | –              | hor H             |
| <i>hupH</i>                    | hydrogenase expression/formation protein               | AZOLI_p30063 | AZL_c01940 | –              | hor H             |
| <i>hupJ</i>                    | rubredoxin                                             | AZOLI_p30064 | AZL_c01950 | –              | hor H             |



|              |                                              |              |            |                |                  |
|--------------|----------------------------------------------|--------------|------------|----------------|------------------|
| <i>hypA1</i> | hydrogenase nickel incorporation protein     | AZOLI_p30065 | AZL_c01960 | _              | hor H            |
| <i>hupR</i>  | hydrogenase transcriptional regulator        | AZOLI_p30066 | AZL_c01970 | _              | hor M            |
| <i>hupE</i>  | [NiFe]-hydrogenase/urease accessory protein  | AZOLI_p30067 | AZL_c01980 | _              | unassigned,anc L |
| <i>hupS</i>  | uptake hydrogenase, small subunit            | AZOLI_p30068 | AZL_c01990 | _              | hor H            |
| <i>hupL</i>  | uptake hydrogenase, large subunit            | AZOLI_p30069 | AZL_c02000 | _              | hor H            |
| <i>hupC</i>  | b-type cytochrome subunit, Ni/Fe-hydrogenase | AZOLI_p30070 | AZL_c02010 | _              | hor H            |
| <i>hypF</i>  | [NiFe]-hydrogenase maturation protein        | AZOLI_p30072 | AZL_c02002 | AZOBR_p1130134 | hor H            |
| <i>hupJ</i>  | rubredoxin                                   | _            | _          | AZOBR_p1130138 | hor H            |
| <i>hupF</i>  | hydrogenase expression/formation protein     | _            | _          | AZOBR_p1130139 | hor M            |
| <i>hupD</i>  | hydrogenase expression/formation protein     | _            | _          | AZOBR_p1130144 | unassigned       |
| <i>hupL</i>  | uptake hydrogenase, large subunit            | _            | _          | AZOBR_p1130145 | anc L            |
| <i>hupS</i>  | uptake hydrogenase, small subunit            | _            | _          | AZOBR_p1130148 | anc L            |

---

#### Opine degradation [12]

|             |                                                  |              |   |               |                  |
|-------------|--------------------------------------------------|--------------|---|---------------|------------------|
| <i>occR</i> | regulator of opine catabolism/uptake operon      | AZOLI_p20663 | _ | AZOBR_p310231 | hor H            |
| <i>ooxB</i> | opine oxidase subunit B                          | AZOLI_p20665 | _ | AZOBR_p310237 | hor H,hor M      |
| _           | putative sarcosine oxidase, alpha subunit        | AZOLI_p20666 | _ | AZOBR_p310238 | hor M            |
| <i>ooxA</i> | opine oxidase subunit A                          | AZOLI_p20667 | _ | AZOBR_p310239 | hor M,hor H      |
| _           | putative sarcosine oxidase, beta subunit         | AZOLI_p20668 | _ | AZOBR_p310241 | unassigned       |
| <i>occT</i> | opine ABC transporter, substrate-binding protein | AZOLI_p20670 | _ | AZOBR_p310243 | unassigned,anc L |

---

#### Organic acid transport & metabolism [4]

|             |                                                                |              |            |               |                                 |
|-------------|----------------------------------------------------------------|--------------|------------|---------------|---------------------------------|
| <i>acsA</i> | acetyl-CoA synthetase (EC 6.2.1.1)                             | AZOLI_2526   | AZL_024380 | AZOBR_10049   | anc H                           |
| <i>citE</i> | citryl-CoA lyase (EC 4.1.3.34; component of EC 4.1.3.6)        | AZOLI_0704   | AZL_008940 | AZOBR_200176  | anc H                           |
| _           | citrate CoA-transferase (EC 2.8.3.10; component of EC 4.1.3.6) | AZOLI_p40309 | AZL_d02810 | AZOBR_p250005 | anc H                           |
| <i>aceA</i> | ATP citrate lyase (EC 4.1.3.1) (glyoxylate bypass)             | AZOLI_p40649 | AZL_d00840 | AZOBR_10531   | anc L,anc L,anc M               |
| <i>fdhA</i> | tungsten-containing formate dehydrogenase, alpha subunit       | AZOLI_p10713 | _          | AZOBR_p470032 | unassigned,anc L                |
| <i>fdhB</i> | tungsten-containing formate dehydrogenase, beta subunit        | AZOLI_p10714 | _          | AZOBR_p470033 | unassigned,hor M                |
| <i>fdsG</i> | formate dehydrogenase, gamma subunit                           | AZOLI_p10068 | AZL_a00150 | AZOBR_p110137 | hor L,hor L,anc L               |
| <i>fdsB</i> | formate dehydrogenase, beta subunit                            | AZOLI_p10069 | AZL_a00160 | AZOBR_p110138 | anc L                           |
| <i>fdsA</i> | formate dehydrogenase, alpha subunit                           | AZOLI_p10070 | AZL_a00170 | AZOBR_p110139 | unassigned,unassigned,<br>anc L |
| <i>fdsC</i> | formate dehydrogenase, accessory protein                       | AZOLI_p10071 | AZL_a00180 | AZOBR_p110140 | anc L                           |
| <i>fdsD</i> | formate dehydrogenase, delta subunit                           | AZOLI_p10072 | AZL_a00190 | AZOBR_p110141 | hor M,hor M,hor L               |
| <i>fumA</i> | fumarate hydratase, class I (EC 4.2.1.2)                       | AZOLI_p10015 | AZL_a07630 | AZOBR_140310  | hor H                           |
| <i>fumC</i> | fumarate hydratase, class II (EC 4.2.1.2)                      | AZOLI_1439   | AZL_017510 | AZOBR_100009  | anc L                           |
| <i>glcD</i> | glycolate oxidase, subunit GlcD (EC 1.1.99.14)                 | AZOLI_0349   | AZL_004970 | AZOBR_70163   | anc M,anc M,anc L               |
| <i>glcE</i> | glycolate oxidase, subunit GlcE (EC 1.1.99.14)                 | AZOLI_0350   | AZL_004980 | AZOBR_70164   | anc M                           |
| <i>glcF</i> | Glycolate oxidase, iron-sulfur subunit GlcF (EC 1.1.99.14)     | AZOLI_0351   | AZL_004990 | AZOBR_70165   | anc M                           |

|              |                                                                    |              |            |                |                                 |
|--------------|--------------------------------------------------------------------|--------------|------------|----------------|---------------------------------|
| <i>gcl</i>   | glyoxylate carboligase (EC 4.1.1.47)                               | AZOLI_p10310 | AZL_a03460 | AZOBR_110008   | hor H                           |
| <i>glxR1</i> | tartronate semialdehyde reductase (EC 1.1.1.60)                    | AZOLI_p40225 | AZL_d01180 | AZOBR_110006   | hor H                           |
| <i>glxR2</i> | tartronate semialdehyde reductase (EC 1.1.1.60)                    | AZOLI_2503   | AZL_024200 | AZOBR_200141   | anc L                           |
| <i>glxK</i>  | glycerate kinase (EC 2.7.1.31)                                     | –            | AZL_a08400 | –              | hor H                           |
| <i>aceB</i>  | malate synthase G (EC 2.3.3.9) (glyoxylate bypass)                 | AZOLI_0237   | AZL_003910 | AZOBR_40127    | anc L                           |
| <i>glcB</i>  | malate synthase A (EC 2.3.3.9) (glyoxylate bypass)                 | AZOLI_p30247 | AZL_c04210 | –              | anc L                           |
| <i>oxc</i>   | oxalyl-CoA decarboxylase (EC 4.1.1.8)                              | AZOLI_p10318 | AZL_a03520 | AZOBR_p470034  | hor H                           |
| <i>frc2</i>  | formyl-CoA transferase (EC 2.8.3.16)                               | AZOLI_p10319 | AZL_a03530 | –              | hor H                           |
| <i>frc1</i>  | formyl-CoA transferase (EC 2.8.3.16)                               | AZOLI_0201   | AZL_025840 | AZOBR_p470024  | unassigned,unassigned,<br>anc L |
| <i>ttuC</i>  | tartrate decarboxylase (EC 4.1.1.73)                               | AZOLI_p10927 | AZL_c03210 | –              | hor H                           |
| –            | acetate transporter                                                | AZOLI_0083   | –          | –              | anc M                           |
| <i>oxlT2</i> | oxalate/formate antiporter                                         | AZOLI_p10287 | AZL_a03270 | AZOBR_110004   | hor H                           |
| <i>oxlT1</i> | oxalate/formate antiporter                                         | AZOLI_p10299 | AZL_a03370 | AZOBR_100402   | hor H                           |
| <i>dctA1</i> | sodium:dicarboxylate symporter                                     | AZOLI_p10630 | AZL_a05650 | AZOBR_p1140111 | hor H                           |
| <i>focA</i>  | formate transporter                                                | AZOLI_p20457 | AZL_b03100 | AZOBR_p420011  | hor H                           |
| <i>dctA2</i> | sodium:dicarboxylate symporter                                     | AZOLI_p30043 | AZL_b05170 | –              | hor H                           |
| –            | putative oxalate/formate antiporter                                | AZOLI_1944   | AZL_019790 | AZOBR_p220002  | hor H                           |
| –            | citrate transporter                                                | AZOLI_1954   | AZL_b02760 | –              | anc L                           |
| <i>dctP</i>  | TRAP dicarboxylate transporter, periplasmic component              | AZOLI_0785   | AZL_009450 | AZOBR_140140   | anc M                           |
| <i>dctQ</i>  | TRAP dicarboxylate transporter, permease component                 | AZOLI_0786   | AZL_009460 | –              | hor H,hor M                     |
| <i>dctQ</i>  | TRAP dicarboxylate transporter, permease component                 | –            | –          | AZOBR_140139   | anc M                           |
| <i>dctM</i>  | TRAP dicarboxylate transporter, large permease component           | AZOLI_0787   | AZL_009470 | AZOBR_140138   | anc L,anc M,anc M               |
| –            | putative TRAP dicarboxylate transporter, large permease component  | AZOLI_1591   | AZL_012850 | AZOBR_p1130058 | anc M                           |
| –            | putative TRAP dicarboxylate transporter, small permease component  | AZOLI_1592   | AZL_012840 | AZOBR_p1130059 | anc M                           |
| –            | putative TRAP dicarboxylate transporter, periplasmic component     | AZOLI_1727   | AZL_018210 | AZOBR_p1130057 | anc M                           |
| –            | TRAP dicarboxylate transporter, periplasmic component              | AZOLI_2523   | AZL_024360 | AZOBR_30029    | anc L                           |
| –            | putative TRAP dicarboxylate transporter, permease component        | –            | –          | AZOBR_30031    | hor H                           |
| –            | TRAP dicarboxylate transport system, periplasmic component         | AZOLI_p10232 | –          | –              | anc L                           |
| –            | TRAP dicarboxylate transport system, small permease component      | AZOLI_p10233 | –          | –              | hor H                           |
| –            | TRAP dicarboxylate transport system, large permease component      | AZOLI_p10234 | –          | –              | hor H                           |
| –            | putative TRAP dicarboxylate transporter, periplasmic component     | –            | –          | AZOBR_p110070  | anc L                           |
| –            | putative TRAP dicarboxylate transporter, small permease component  | –            | –          | AZOBR_p110071  | anc L                           |
| –            | putative TRAP dicarboxylate transporter, large permease component  | –            | –          | AZOBR_p110072  | anc L                           |
| –            | putative TRAP dicarboxylate transporter, periplasmic component     | –            | –          | AZOBR_p130128  | unassigned                      |
| –            | putative TRAP dicarboxylate transporter, large permease component  | –            | –          | AZOBR_p130130  | hor H                           |
| –            | putative TRAP dicarboxylate transporter, fused permease components | –            | –          | AZOBR_p130210  | hor H                           |

|   |                                                                    |              |            |               |                   |
|---|--------------------------------------------------------------------|--------------|------------|---------------|-------------------|
| — | putative TRAP dicarboxylate transporter, periplasmic component     | —            | —          | AZOBR_p130211 | unassigned        |
| — | TRAP dicarboxylate transporter, large permease component           | AZOLI_p20176 | AZL_a08570 | —             | hor H             |
| — | putative TRAP dicarboxylate transporter, small permease component  | AZOLI_p20177 | AZL_a08580 | —             | hor H             |
| — | TRAP dicarboxylate transporter, periplasmic component              | AZOLI_p20180 | AZL_a08600 | —             | hor H             |
| — | putative dicarboxylate carrier MatC-like                           | AZOLI_p20198 | AZL_b03470 | —             | hor H             |
| — | TRAP dicarboxylate transport system, periplasmic component         | AZOLI_p20448 | —          | —             | hor H             |
| — | TRAP dicarboxylate transport system, small permease component      | AZOLI_p20449 | —          | —             | anc L             |
| — | TRAP dicarboxylate transport system, large permease component      | AZOLI_p20450 | —          | —             | hor H             |
| — | TRAP dicarboxylate transport system, periplasmic component         | —            | —          | AZOBR_p270290 | anc L             |
| — | TRAP dicarboxylate transport system, small permease component      | —            | —          | AZOBR_p270291 | anc L             |
| — | TRAP dicarboxylate transport system, large permease component      | —            | —          | AZOBR_p270292 | hor H             |
| — | TRAP dicarboxylate transporter, periplasmic component              | AZOLI_p30078 | —          | AZOBR_p230051 | anc L             |
| — | TRAP dicarboxylate transporter, periplasmic component              | AZOLI_p30079 | —          | AZOBR_p230052 | unassigned        |
| — | TRAP dicarboxylate transporter, permease component                 | AZOLI_p30080 | —          | AZOBR_p230053 | anc L             |
| — | putative TRAP dicarboxylate transporter, fused permease components | AZOLI_p30105 | AZL_c02230 | AZOBR_120023  | anc M,anc L,anc M |
| — | putative TRAP dicarboxylate transporter, periplasmic component     | AZOLI_p30106 | AZL_c02240 | AZOBR_120022  | anc M             |
| — | putative TRAP dicarboxylate transporter, fused permease components | —            | AZL_a04620 | AZOBR_p310082 | hor H             |
| — | putative TRAP dicarboxylate transporter, periplasmic component     | —            | AZL_a04630 | AZOBR_p310083 | hor H             |
| — | TRAP dicarboxylate transport system, large permease component      | —            | —          | AZOBR_p310124 | hor H             |
| — | TRAP dicarboxylate transport system, small permease component      | —            | —          | AZOBR_p310125 | hor H             |
| — | TRAP dicarboxylate transport system, large permease component      | —            | —          | AZOBR_p310249 | hor H             |
| — | TRAP dicarboxylate transport system, small permease component      | —            | —          | AZOBR_p310250 | hor H             |
| — | TRAP dicarboxylate transport system, periplasmic component         | —            | —          | AZOBR_p310251 | hor H             |
| — | TRAP dicarboxylate transport system, periplasmic component         | AZOLI_p40037 | AZL_d00410 | AZOBR_p130073 | hor H             |
| — | TRAP dicarboxylate transport system, large permease component      | AZOLI_p40038 | AZL_d00400 | AZOBR_p130074 | hor H             |
| — | TRAP dicarboxylate transport system, small permease component      | AZOLI_p40039 | AZL_d00390 | AZOBR_p130075 | hor H             |
| — | TRAP dicarboxylate transport system, periplasmic component         | AZOLI_p40233 | —          | AZOBR_p450012 | hor H             |
| — | TRAP dicarboxylate transport system, small permease component      | AZOLI_p40234 | —          | AZOBR_p450013 | hor H             |
| — | TRAP dicarboxylate transport system, large permease component      | AZOLI_p40235 | —          | AZOBR_p420004 | hor H             |
| — | TRAP dicarboxylate transport system, small permease component      | —            | —          | AZOBR_p420005 | hor H             |

|   |                                                               |              |            |               |            |
|---|---------------------------------------------------------------|--------------|------------|---------------|------------|
| – | TRAP dicarboxylate transport system, periplasmic component    | –            | –          | AZOBR_p420006 | hor H      |
| – | TRAP dicarboxylate transport system, large permease component | –            | –          | AZOBR_p410027 | hor H      |
| – | TRAP dicarboxylate transport system, small permease component | –            | –          | AZOBR_p410028 | unassigned |
| – | TRAP dicarboxylate transport system, periplasmic component    | –            | –          | AZOBR_p410029 | anc L      |
| – | TRAP dicarboxylate transporter, periplasmic component         | AZOLI_p50106 | AZL_e02190 | –             | hor H      |
| – | TRAP dicarboxylate transporter, small permease component      | AZOLI_p50107 | AZL_e02180 | –             | hor H      |
| – | TRAP dicarboxylate transporter, large permease component      | AZOLI_p50108 | AZL_e02170 | –             | hor H      |
| – | TRAP dicarboxylate transporter, small permease component      | AZOLI_p50112 | AZL_e03940 | AZOBR_30030   | anc L      |
| – | putative TRAP dicarboxylate transporter, permease component   | AZOLI_p50113 | AZL_e03950 | –             | hor H      |

---

### Osmoprotection [13]

|              |                                                                               |              |            |               |                  |
|--------------|-------------------------------------------------------------------------------|--------------|------------|---------------|------------------|
| <i>otsA</i>  | trehalose 6-phosphate synthase                                                | AZOLI_0165   | AZL_002860 | AZOBR_70093   | anc M            |
| <i>otsB</i>  | trehalose 6-phosphate phosphatase                                             | AZOLI_0395   | AZL_005410 | AZOBR_160045  | anc L            |
| <i>potA</i>  | spermidine/putrescine ABC transporter, ATP-binding component                  | AZOLI_0010   | AZL_026670 | AZOBR_10275   | anc L            |
| –            | spermidine/putrescine ABC transporter, periplasmic component                  | AZOLI_0011   | AZL_026680 | AZOBR_10276   | anc L            |
| –            | polyamine ABC transporter, permease component                                 | AZOLI_2708   | AZL_003310 | AZOBR_10269   | anc L            |
| –            | polyamine ABC transporter, permease component                                 | AZOLI_2709   | AZL_003300 | AZOBR_10270   | anc L            |
| –            | putative glycine betaine ABC transporter, ATPase component                    | AZOLI_p10866 | –          | –             | unassigned       |
| –            | glycine betaine ABC transporter, substrate-binding component                  | AZOLI_p10867 | AZL_c01750 | AZOBR_p220082 | hor H            |
| <i>proV1</i> | glycine betaine ABC transporter, ATP-binding component                        | AZOLI_p10877 | AZL_c01830 | –             | hor H            |
| –            | glycine betaine ABC transporter, ATP-binding component                        | –            | –          | AZOBR_p220084 | hor H            |
| –            | glycine betaine ABC transporter, permease component                           | AZOLI_p10878 | AZL_c01840 | –             | hor H            |
| –            | glycine betaine ABC transporter, permease component                           | –            | –          | AZOBR_p220083 | hor H            |
| –            | polyamine ABC transporter, periplasmic component                              | AZOLI_p20199 | AZL_a10530 | –             | unassigned       |
| –            | polyamine ABC transporter, ATP-binding component                              | AZOLI_p20200 | AZL_a10520 | –             | hor H            |
| –            | polyamine ABC transporter, permease component                                 | AZOLI_p20201 | AZL_a10510 | –             | anc L            |
| <i>betT</i>  | Betaine/Carnitine/Choline transporter                                         | AZOLI_p20508 | –          | AZOBR_p220028 | hor H            |
| –            | putative spermidine/putrescine ABC transporter, permease component            | AZOLI_p20565 | AZL_b05110 | AZOBR_p130048 | hor H            |
| –            | putative spermidine/putrescine ABC transporter, permease component            | AZOLI_p20566 | AZL_b05100 | AZOBR_p130047 | hor H            |
| –            | putative spermidine/putrescine ABC transporter substrate-binding protein      | AZOLI_p20567 | AZL_b05090 | AZOBR_p130045 | hor H            |
| –            | putative spermidine/putrescine ABC transporter subunit, ATP-binding component | AZOLI_p20568 | AZL_b05080 | AZOBR_p130044 | hor H            |
| <i>proX</i>  | proline/glycine betaine ABC transporter, periplasmic component                | AZOLI_p30129 | AZL_c02440 | –             | unassigned,anc L |
| <i>proW</i>  | proline/glycine betaine ABC transporter, membrane component                   | AZOLI_p30131 | AZL_c02460 | –             | hor H            |
| <i>proV2</i> | proline/glycine betaine ABC transporter, ATP-binding component                | AZOLI_p30132 | AZL_c02470 | –             | hor H            |

|                                           |                                                                       |              |            |                |                   |
|-------------------------------------------|-----------------------------------------------------------------------|--------------|------------|----------------|-------------------|
| <i>potI</i>                               | putrescine ABC transporter, permease component                        | AZOLI_p30328 | AZL_c00720 | AZOBR_130014   | anc H             |
| <i>potH</i>                               | putrescine ABC transporter, permease component                        | AZOLI_p30329 | AZL_c00710 | AZOBR_130015   | anc M             |
| <i>potG</i>                               | putrescine ABC transporter, ATP-binding component                     | AZOLI_p30330 | AZL_c00700 | AZOBR_130016   | anc L,anc L,anc M |
| <i>potF</i>                               | putrescine ABC transporter, periplasmic component                     | AZOLI_p30331 | AZL_c00690 | AZOBR_130017   | anc M             |
| –                                         | putative spermidine/putrescine ABC transporter, permease component    | AZOLI_p30380 | AZL_c00230 | AZOBR_p1120051 | anc L             |
| –                                         | putative spermidine/putrescine ABC transporter, periplasmic component | AZOLI_p30381 | AZL_c00220 | AZOBR_p1120052 | anc L             |
| –                                         | putative spermidine/putrescine ABC transporter, ATP-binding component | AZOLI_p30382 | AZL_c00210 | –              | anc L             |
| –                                         | glycine betaine/choline ABC transporter, permease component           | AZOLI_p30579 | AZL_a10070 | AZOBR_p130038  | hor H             |
| –                                         | glycine betaine/choline ABC transporter, ATP-binding component        | AZOLI_p30580 | AZL_a10060 | AZOBR_p130039  | hor H             |
| –                                         | glycine betaine/choline ABC transporter, permease component           | AZOLI_p30581 | AZL_a10050 | AZOBR_p130040  | hor H             |
| <b>Oxidative stress resistance [14]</b>   |                                                                       |              |            |                |                   |
| <i>sodB1</i>                              | superoxide dismutase Fe/Mn cofactor (EC 1.15.1.1)                     | AZOLI_1390   | AZL_014560 | AZOBR_p120093  | anc M             |
| <i>sodB2</i>                              | superoxide dismutase Fe/Mn cofactor (EC 1.15.1.1)                     | AZOLI_p20656 | –          | –              | anc L             |
| <i>sodB</i>                               | superoxide dismutase Fe/Mn cofactor (EC 1.15.1.1)                     | –            | –          | AZOBR_p440007  | anc L             |
| <i>sodC</i>                               | superoxide dismutase (Cu-Zn) (EC 1.15.1.1)                            | AZOLI_2596   | AZL_024870 | –              | hor H             |
| <i>katN</i>                               | catalase (EC 1.11.1.6)                                                | AZOLI_p10484 | AZL_a04090 | AZOBR_140171   | hor H             |
| <i>katG</i>                               | catalase (EC 1.11.1.6)                                                | AZOLI_p30178 | –          | –              | hor H             |
| <i>katA</i>                               | catalase (EC 1.11.1.6)                                                | AZOLI_p30387 | AZL_c00160 | AZOBR_p440183  | hor M             |
| <b>Polyhydroxybutyrate synthesis [15]</b> |                                                                       |              |            |                |                   |
| <i>phbC</i>                               | PHB polymerase (EC 2.3.1.-)                                           | AZOLI_p10260 | AZL_a02630 | AZOBR_100383   | anc H             |
| –                                         | PHB depolymerase (EC 3.1.1.75)                                        | AZOLI_p10266 | AZL_a02680 | –              | hor M,unassigned  |
| –                                         | PHB depolymerase (EC 3.1.1.75)                                        | AZOLI_p10267 | AZL_a02690 | –              | hor M,unassigned  |
| –                                         | putative polyhydroxyalkanoate synthase (EC 2.3.1.-)                   | AZOLI_2389   | AZL_023140 | AZOBR_p440016  | anc H             |
| <b>Polyketide synthase [16]</b>           |                                                                       |              |            |                |                   |
| –                                         | putative beta-ketoacyl synthase                                       | AZOLI_p10840 | –          | –              | hor H             |
| –                                         | putative chalcone synthase (EC 2.3.1.74)                              | AZOLI_p30075 | –          | AZOBR_140202   | anc L             |
| <b>Quinone oxidation [17]</b>             |                                                                       |              |            |                |                   |
| –                                         | Putative Mn <sup>2+</sup> multicopper oxidase (laccase-like)          | AZOLI_p30139 | AZL_c02540 | –              | anc L             |
| –                                         | Putative Mn <sup>2+</sup> multicopper oxidase (laccase-like)          | –            | –          | AZOBR_10264    | anc L             |
| –                                         | Putative multicopper oxidase (laccase-like)                           | AZOLI_1528   | AZL_011040 | AZOBR_p440175  | hor L,hor L,anc L |
| –                                         | Putative multicopper oxidase (laccase-like)                           | AZOLI_1691   | –          | –              | hor H             |
| <b>RTX toxin synthesis [18]</b>           |                                                                       |              |            |                |                   |
| –                                         | RTX toxins and related Ca <sup>2+</sup> -binding domain (1950 AA)     | AZOLI_0777   | –          | AZOBRv2_40002  | anc L,hor H       |
| –                                         | putative hemolysin-type Calcium-binding RTX toxin                     | AZOLI_p20390 | AZL_a07150 | AZOBR_p210039  | unassigned        |

|   |                                                                   |              |            |                |                        |
|---|-------------------------------------------------------------------|--------------|------------|----------------|------------------------|
| – | putative Ca binding RTX toxin (5193 AA)                           | AZOLI_p30303 | AZL_c04560 | –              | anc L                  |
| – | RTX toxins and related Ca <sup>2+</sup> -binding domain (6548 AA) | AZOLI_p40606 | AZL_a02370 | AZOBR_p1140098 | hor H,hor H,hor M      |
| – | RTX toxins and related Ca <sup>2+</sup> -binding domain (5184 AA) | AZOLI_p60065 | –          | –              | hor H                  |
| – | RTX toxins and related Ca <sup>2+</sup> -binding domain           | AZOLI_p60167 | AZL_f00090 | –              | anc L,hor H            |
| – | RTX toxins and related Ca <sup>2+</sup> -binding domain (2840 AA) | AZOLI_p60263 | AZL_f01550 | AZOBR_p270071  | unassigned,hor H,anc L |
| – | RTX toxins and related Ca <sup>2+</sup> -binding domain           | –            | AZL_a06050 | –              | hor H                  |

---

### Siderophore biosynthesis and transport [19]

|             |                                                         |              |            |                |                   |
|-------------|---------------------------------------------------------|--------------|------------|----------------|-------------------|
| <i>entC</i> | isochorismate synthase I (EC 5.4.4.2)                   | –            | –          | AZOBR_p350073  | hor H             |
| <i>entE</i> | 2,3-dihydroxybenzoate-AMP ligase (EC 2.7.7.58)          | –            | –          | AZOBR_p350074  | hor H             |
| <i>entB</i> | isochorismatase (EC 3.3.2.1)                            | –            | –          | AZOBR_p350075  | hor H             |
| <i>entA</i> | 2,3-dihydroxybenzoate dehydrogenase (EC 1.3.1.28)       | –            | –          | AZOBR_p350076  | hor H             |
| <i>entF</i> | enterobactin synthase (EC 2.7.7.-)                      | –            | –          | AZOBR_p350079  | hor H             |
| <i>pchD</i> | 2,3-dihydroxybenzoate-AMP ligase                        | AZOLI_p20159 | –          | –              | hor H             |
| <i>pchE</i> | pyochelin synthase E                                    | AZOLI_p20160 | –          | –              | hor H             |
| <i>pchF</i> | pyochelin synthetase F                                  | AZOLI_p20161 | –          | –              | hor H             |
| <i>pchC</i> | pyochelin biosynthetic thioesterase                     | AZOLI_p20163 | –          | –              | hor H             |
| <i>pchA</i> | isochorismate synthase                                  | AZOLI_p20165 | –          | –              | hor H             |
| –           | putative isochorismatase hydrolase                      | AZOLI_1628   | AZL_016380 | AZOBR_p1180028 | anc L,anc M,anc H |
| –           | putative siderophore biosynthesis protein RhbC-like     | AZOLI_p20604 | –          | –              | hor H             |
| –           | putative siderophore biosynthesis protein, RhsF-like    | AZOLI_p20605 | –          | –              | hor H             |
| <i>entS</i> | entereobactin exporter                                  | –            | –          | AZOBR_p350069  | hor H             |
| <i>tonB</i> | Ferric siderophore transporter                          | AZOLI_p40405 | AZL_d01940 | AZOBR_p210088  | anc L             |
| <i>hmuV</i> | hemin ABC transporter, ATP-binding component            | AZOLI_p20677 | –          | AZOBR_p350048  | hor H             |
| <i>hmuT</i> | hemin ABC transporter, periplasmic component            | AZOLI_p20679 | –          | AZOBR_p350046  | hor H,hor M       |
| <i>hmuU</i> | hemin ABC transporter, permease component               | AZOLI_p20678 | –          | AZOBR_p350047  | hor H             |
| <i>fbpC</i> | iron ABC transporter, ATP-binding component             | AZOLI_p10397 | AZL_a07840 | –              | hor H             |
| <i>fhuC</i> | iron-hydroxamate ABC transporter, ATP-binding component | AZOLI_p20504 | –          | AZOBR_p170129  | hor H             |
| <i>fhuD</i> | iron-hydroxamate ABC transporter, periplasmic component | AZOLI_p20505 | –          | AZOBR_p170128  | hor H             |
| <i>fhuB</i> | iron-hydroxamate ABC transporter, permease component    | AZOLI_p20506 | –          | AZOBR_p170127  | hor H             |
| –           | iron-siderophore ABC transporter, ATP-binding component | –            | –          | AZOBR_p1110105 | anc L             |
| –           | iron-siderophore ABC transporter, ATP-binding component | AZOLI_p10041 | –          | –              | unassigned        |
| <i>fecE</i> | iron-siderophore ABC transporter, ATP-binding component | AZOLI_p20475 | –          | AZOBR_p1110094 | hor H             |
| –           | iron-siderophore ABC transporter, ATP-binding component | AZOLI_p20619 | AZL_004840 | –              | hor H             |
| –           | iron-siderophore ABC transporter, ATP-binding component | AZOLI_p20621 | AZL_004820 | –              | hor H             |
| –           | iron-siderophore ABC transporter, periplasmic component | –            | –          | AZOBR_p1110107 | anc L             |
| –           | iron-siderophore ABC transporter, periplasmic component | AZOLI_p10043 | –          | –              | hor M             |

|             |                                                                  |              |            |                |                                 |
|-------------|------------------------------------------------------------------|--------------|------------|----------------|---------------------------------|
| _           | iron-siderophore ABC transporter, periplasmic component          | AZOLI_p20478 | _          | AZOBR_p1110097 | hor H                           |
| _           | iron-siderophore ABC transporter, permease component             | _            | _          | AZOBR_p1110106 | anc L                           |
| _           | iron-siderophore ABC transporter, permease component             | AZOLI_p10042 | _          | _              | hor M                           |
| _           | iron-siderophore ABC transporter, permease component             | AZOLI_p20476 | _          | AZOBR_p1110095 | hor H                           |
| _           | iron-siderophore ABC transporter, permease component             | AZOLI_p20477 | _          | AZOBR_p1110096 | hor H                           |
| <i>exbD</i> | membrane spanning protein in TonB-ExbB-ExbD complex              | AZOLI_p40406 | AZL_d01930 | AZOBR_p210087  | unassigned,hor M,<br>unassigned |
| <i>exbB</i> | membrane spanning protein in TonB-ExbB-ExbD complex              | AZOLI_p40407 | AZL_d01920 | AZOBR_p210086  | hor H                           |
| _           | putative ferrous iron transporter, FeoA-like subunit             | AZOLI_p20553 | AZL_b04590 | _              | anc L                           |
| _           | putative ferrous iron transporter, FeoB-like subunit             | AZOLI_p20554 | AZL_b04580 | AZOBR_p170036  | anc L                           |
| _           | putative iron ABC transporter, periplasmic component             | AZOLI_p10394 | AZL_a07860 | AZOBR_p140003  | anc L,unassigned,<br>unassigned |
| _           | putative iron ABC transporter, periplasmic component             | AZOLI_p10400 | AZL_a07810 | _              | hor H                           |
| _           | putative iron ABC transporter, periplasmic component             | AZOLI_p20620 | AZL_004830 | _              | hor H                           |
| _           | putative iron ABC transporter, permease component                | AZOLI_p10393 | AZL_a07870 | AZOBR_p140002  | hor H                           |
| _           | putative iron-siderophore ABC transporter, periplasmic component | _            | _          | AZOBR_p220058  | hor H                           |
| _           | putative iron-siderophore ABC transporter, permease component    | _            | _          | AZOBR_p220059  | hor H                           |
| _           | putative siderophore ABC transporter, ATP-binding component      | AZOLI_p20154 | _          | _              | hor M                           |
| _           | putative siderophore ABC transporter, ATP-binding component      | _            | _          | AZOBR_p220061  | hor H                           |
| _           | putative siderophore ABC transporter, periplasmic component      | AZOLI_p20156 | _          | _              | anc L                           |
| _           | putative siderophore ABC transporter, periplasmic component      | _            | AZL_026430 | _              | anc L                           |
| _           | putative siderophore ABC transporter, periplasmic component      | AZOLI_p50135 | _          | _              | hor L                           |
| _           | putative siderophore ABC transporter, permease component         | AZOLI_p20155 | _          | _              | hor L                           |
| _           | putative siderophore ABC transporter, permease component         | _            | AZL_026420 | _              | hor L                           |
| _           | putative siderophore-interacting protein                         | _            | _          | AZOBR_p220060  | hor H                           |
| _           | putative siderophore-interacting protein, MxcB-like              | AZOLI_p20501 | _          | _              | hor M                           |
| _           | putative TonB-dependent receptor                                 | _            | AZL_028160 | _              | hor H                           |
| _           | putative TonB-dependent receptor                                 | _            | AZL_007800 | _              | anc L                           |
| _           | putative TonB-dependent receptor                                 | _            | AZL_a08620 | AZOBR_p440028  | anc L                           |
| _           | putative TonB-dependent receptor                                 | _            | _          | AZOBR_p1110108 | anc L                           |
| _           | putative TonB-dependent receptor                                 | AZOLI_p20602 | _          | AZOBR_p440066  | unassigned                      |
| _           | putative TonB-dependent siderophore receptor                     | AZOLI_p20157 | _          | AZOBR_p220057  | hor H                           |
| _           | putative TonB-dependent siderophore receptor                     | AZOLI_p20623 | AZL_004810 | _              | hor H                           |
| _           | putative TonB-like ferric siderophore receptor                   | AZOLI_p20482 | _          | AZOBR_p1110090 | hor L                           |
| _           | siderophore ABC transporter, ATP-binding component               | AZOLI_p50132 | AZL_026410 | _              | hor L                           |
| _           | siderophore ABC transporter, permease component                  | AZOLI_p50133 | _          | _              | hor L                           |

|             |                                                |              |            |               |             |
|-------------|------------------------------------------------|--------------|------------|---------------|-------------|
| –           | siderophore-interacting protein                | AZOLI_p50134 | –          | –             | hor L       |
| –           | TonB-dependent outer membrane hemin receptor   | AZOLI_p20672 | –          | AZOBR_p350053 | hor H       |
| –           | TonB-dependent outer membrane receptor         | AZOLI_p10047 | –          | –             | anc L       |
| –           | TonB-dependent siderophore receptor            | AZOLI_1178   | –          | AZOBR_p310289 | anc L       |
| <i>fhuA</i> | TonB-dependent siderophore receptor            | AZOLI_p20503 | –          | AZOBR_p170130 | hor H       |
| –           | TonB-dependent siderophore receptor, FhuA-like | AZOLI_p10405 | AZL_d04450 | –             | hor H,hor M |
| –           | TonB-dependent siderophore receptor, FhuA-like | –            | –          | AZOBR_p310120 | hor H       |
| –           | TonB-dependent siderophore receptor, FhuA-like | AZOLI_p50136 | –          | –             | hor H       |

---

**Type VI secretion system [20]**

|   |                                                                       |              |            |                |             |
|---|-----------------------------------------------------------------------|--------------|------------|----------------|-------------|
| – | putative component of type VI secretion system                        | AZOLI_0998   | AZL_017990 | –              | hor L       |
| – | putative component of type VI secretion system                        | AZOLI_0999   | AZL_017980 | –              | hor M,hor H |
| – | putative component of type VI secretion system                        | AZOLI_1000   | AZL_017970 | –              | hor L,hor M |
| – | putative component of type VI secretion system                        | AZOLI_1001   | AZL_017960 | –              | anc L       |
| – | putative component of type VI secretion system                        | AZOLI_1004   | AZL_017930 | –              | hor M       |
| – | putative component of type VI secretion system                        | AZOLI_1005   | AZL_017920 | –              | hor L       |
| – | putative component of type VI secretion system                        | AZOLI_1006   | AZL_017910 | –              | hor L       |
| – | putative component of type VI secretion system                        | AZOLI_1007   | AZL_017900 | –              | hor L       |
| – | putative component of type VI secretion system                        | AZOLI_1008   | AZL_017890 | –              | hor M       |
| – | putative component of type VI secretion system                        | AZOLI_1009   | AZL_017880 | –              | hor L       |
| – | putative component of type VI secretion system                        | AZOLI_1010   | AZL_017870 | –              | hor L       |
| – | putative component of type VI secretion system                        | AZOLI_1011   | AZL_017860 | –              | hor M       |
| – | putative component of type VI secretion system                        | AZOLI_1015   | AZL_017820 | –              | hor L       |
| – | putative component of type VI secretion system                        | AZOLI_1016   | AZL_017810 | –              | hor H,hor M |
| – | putative component of type VI secretion system                        | AZOLI_1020   | AZL_017780 | –              | anc L,hor L |
| – | putative component of type VI secretion system                        | AZOLI_1021   | AZL_017770 | –              | hor L       |
| – | putative effector of type VI secretion system (lcmH-like)             | AZOLI_p30482 | –          | –              | hor L       |
| – | putative effector of type VI secretion system (lcmF-like)             | AZOLI_p30483 | –          | –              | hor M       |
| – | putative effector of type VI secretion system (Vgr-like)              | AZOLI_p30485 | –          | –              | hor H       |
| – | putative effector of type VI secretion system (FHA domain)            | AZOLI_p30488 | –          | –              | hor L       |
| – | putative serine-threonine kinase, type VI secretion system associated | AZOLI_p30489 | –          | –              | hor H       |
| – | putative effector of type VI secretion system                         | –            | AZL_a01570 | AZOBR_p1150012 | hor H       |
| – | putative effector of type VI secretion system                         | –            | AZL_a01580 | –              | hor H       |
| – | putative effector of type VI secretion system                         | –            | AZL_a01590 | AZOBR_p1150011 | hor H       |
| – | putative effector of type VI secretion system                         | –            | AZL_a01600 | AZOBR_p1150009 | hor H       |
| – | putative effector of type VI secretion system                         | –            | AZL_a01610 | AZOBR_p1150008 | hor H       |
| – | putative effector of type VI secretion system                         | –            | AZL_a01700 | AZOBR_p1140133 | hor H       |



|   |                                               |   |            |                |             |
|---|-----------------------------------------------|---|------------|----------------|-------------|
| _ | putative effector of type VI secretion system | _ | AZL_a01710 | AZOBR_p1140132 | hor H       |
| _ | putative effector of type VI secretion system | _ | AZL_a01720 | AZOBR_p1140131 | hor H       |
| _ | putative effector of type VI secretion system | _ | AZL_a01730 | AZOBR_p1140130 | hor H       |
| _ | putative effector of type VI secretion system | _ | AZL_a01740 | AZOBR_p1140129 | hor H       |
| _ | putative effector of type VI secretion system | _ | AZL_a01750 | AZOBR_p1140128 | hor H       |
| _ | putative effector of type VI secretion system | _ | AZL_a01770 | AZOBR_p1140126 | hor H       |
| _ | putative effector of type VI secretion system | _ | AZL_a01780 | AZOBR_p1140125 | hor M,anc L |

---

### Vitamin and cofactor biosynthesis [21]

|               |                                                      |              |            |                |                        |
|---------------|------------------------------------------------------|--------------|------------|----------------|------------------------|
| <i>ldc</i>    | lysine/ornithine decarboxylase                       | AZOLI_0502   | AZL_006200 | AZOBR_10013    | anc L                  |
| <i>thiG</i>   | thiamine biosynthesis (Vitamin B1)                   | AZOLI_0318   | AZL_004540 | AZOBR_p440103  | anc L,anc M,anc M      |
| <i>thiS</i>   | thiamine biosynthesis                                | AZOLI_0319   | AZL_004530 | AZOBR_p440104  | anc L,anc L,unassigned |
| <i>thiO</i>   | thiamine biosynthesis                                | AZOLI_0320   | AZL_004520 | AZOBR_p440105  | anc L                  |
| <i>thiC</i>   | thiamine biosynthesis                                | AZOLI_0384   | AZL_005290 | AZOBR_110003   | anc M                  |
| <i>thiE</i>   | thiamine biosynthesis                                | AZOLI_0809   | AZL_009640 | AZOBR_150017   | anc H                  |
| <i>thiL</i>   | thiamine biosynthesis                                | AZOLI_0867   | AZL_010130 | AZOBR_140246   | anc M                  |
| <i>thiF</i>   | thiamine biosynthesis                                | AZOLI_2660   | AZL_003700 | AZOBR_10238    | anc H,anc H,anc M      |
| <i>thiD</i>   | thiamine biosynthesis                                | AZOLI_p50062 | AZL_e01260 | AZOBR_100217   | anc H                  |
| _             | riboflavin biosynthesis (Vitamin B2)                 | AZOLI_0057   | AZL_026320 | AZOBR_10418    | anc H                  |
| <i>ribF</i>   | riboflavin biosynthesis                              | AZOLI_0507   | AZL_006230 | AZOBR_70017    | anc H                  |
| <i>ribH</i>   | riboflavin biosynthesis                              | AZOLI_0869   | AZL_010150 | AZOBR_140244   | anc M                  |
| <i>ribBA</i>  | riboflavin biosynthesis                              | AZOLI_0870   | AZL_010160 | AZOBR_140243   | anc H                  |
| <i>ribC</i>   | riboflavin biosynthesis                              | AZOLI_0871   | AZL_010170 | AZOBR_140242   | anc H                  |
| <i>ribD</i>   | riboflavin biosynthesis                              | AZOLI_0872   | AZL_010180 | AZOBR_140241   | anc H                  |
| _             | nicotinate/nicotinamide biosynthesis (Vitamin B3/PP) | AZOLI_0290   | AZL_004310 | AZOBR_40269    | anc M                  |
| _             | nicotinate/nicotinamide biosynthesis                 | AZOLI_2420   | AZL_023370 | AZOBR_40318    | anc M,anc H,anc H      |
| <i>xapA</i>   | nicotinate/nicotinamide biosynthesis                 | AZOLI_p10492 | AZL_a04160 | AZOBR_100129   | hor H                  |
| _             | nicotinate/nicotinamide biosynthesis                 | AZOLI_p10549 | AZL_a07010 | AZOBR_p1110150 | hor H                  |
| _             | nicotinate/nicotinamide biosynthesis                 | AZOLI_p10607 | AZL_a05550 | AZOBR_p140049  | anc M,anc M,unassigned |
| <i>nadE</i>   | nicotinate/nicotinamide biosynthesis                 | AZOLI_p30432 | AZL_c05250 | AZOBR_p170147  | hor H                  |
| <i>nadC</i>   | nicotinate/nicotinamide biosynthesis                 | AZOLI_p40290 | AZL_d02900 | AZOBR_p1100106 | anc M                  |
| <i>nadB</i>   | nicotinate/nicotinamide biosynthesis                 | AZOLI_p40291 | AZL_d02890 | AZOBR_p1100108 | anc L,anc L,anc M      |
| <i>nadA</i>   | nicotinate/nicotinamide biosynthesis                 | AZOLI_p40293 | AZL_d02880 | AZOBR_p1110003 | anc L                  |
| <i>pntB1</i>  | nicotinate/nicotinamide biosynthesis                 | AZOLI_p10305 | AZL_013370 | AZOBR_100082   | anc M                  |
| <i>pntB2</i>  | nicotinate/nicotinamide biosynthesis                 | AZOLI_p40620 | AZL_a03420 | AZOBR_100410   | anc M                  |
| <i>pntAB1</i> | nicotinate/nicotinamide biosynthesis                 | AZOLI_p10304 | AZL_a03410 | AZOBR_100409   | anc H                  |
| <i>pntAB2</i> | nicotinate/nicotinamide biosynthesis                 | AZOLI_p40621 | AZL_013360 | AZOBR_100081   | anc H                  |

|                  |                                        |              |            |                 |                        |
|------------------|----------------------------------------|--------------|------------|-----------------|------------------------|
| <i>pntAA1</i>    | nicotinate/nicotinamide biosynthesis   | AZOLI_p10303 | AZL_013350 | AZOBR_100080    | anc L                  |
| <i>pntAA2</i>    | nicotinate/nicotinamide biosynthesis   | AZOLI_p40622 | –          | –               | unassigned             |
| <i>panB</i>      | pantothenate biosynthesis (Vitamin B5) | AZOLI_1886   | AZL_019370 | AZOBR_100084    | anc H,anc M,anc M      |
| <i>panE</i>      | pantothenate biosynthesis              | AZOLI_p10301 | AZL_a03380 | AZOBR_100406    | hor H                  |
| <i>panC</i>      | pantothenate biosynthesis              | AZOLI_p10480 | AZL_a03250 | AZOBR_140166    | anc H                  |
| <i>pdxY</i>      | pyridoxine biosynthesis (Vitamin B6)   | AZOLI_0705   | AZL_008950 | AZOBR_200175    | anc L                  |
| <i>pdxH</i>      | pyridoxine biosynthesis                | AZOLI_0845   | AZL_009950 | AZOBR_140052    | anc M,anc L,anc M      |
| <i>pdxJ</i>      | pyridoxine biosynthesis                | AZOLI_1507   | AZL_011790 | AZOBR_p1170088  | anc H                  |
| <i>pdxA</i>      | pyridoxine biosynthesis                | AZOLI_1511   | AZL_011750 | AZOBR_p130179   | anc H                  |
| –                | pyridoxine biosynthesis                | AZOLI_p20631 | AZL_a10620 | AZOBR_p220105   | hor H                  |
| <i>dxs</i>       | pyridoxine biosynthesis                | AZOLI_p30184 | AZL_c00990 | AZOBR_p1140022  | anc M                  |
| <i>serC</i>      | pyridoxine biosynthesis                | AZOLI_p30197 | AZL_c00880 | AZOBR_150084    | anc M,anc M,anc H      |
| <i>bioF</i>      | biotin biosynthesis (Vitamin B8)       | –            | –          | AZOBR_p440134   | anc L                  |
| <i>bioCD</i>     | biotin biosynthesis                    | –            | –          | AZOBR_p440137   | anc L                  |
| <i>bioA</i>      | biotin biosynthesis                    | –            | –          | AZOBR_p440138   | anc L                  |
| <i>bioB</i>      | biotin biosynthesis                    | –            | –          | AZOBR_p440139   | hor H                  |
| <i>folD</i>      | folate biosynthesis (Vitamin B9)       | AZOLI_2920   | AZL_026930 | AZOBR_10134     | hor H                  |
| <i>folC</i>      | folate biosynthesis                    | AZOLI_2925   | AZL_027050 | AZOBR_10102     | anc M                  |
| <i>folA</i>      | folate biosynthesis                    | AZOLI_3018   | AZL_000160 | AZOBR_10482     | hor H                  |
| <i>folE</i>      | folate biosynthesis                    | AZOLI_3091   | AZL_028440 | AZOBR_10090     | anc H                  |
| <i>folK</i>      | folate biosynthesis                    | AZOLI_p10810 | AZL_a04360 | AZOBR_p110121   | anc M                  |
| <i>folB-like</i> | folate biosynthesis                    | AZOLI_p10900 | AZL_c01880 | –               | anc H                  |
| <i>folP</i>      | folate biosynthesis                    | AZOLI_p50060 | AZL_e01240 | AZOBR_100215    | anc H                  |
| <i>pabC</i>      | folate biosynthesis                    | AZOLI_p30457 | AZL_c04960 | AZOBR_p230039   | anc M,anc M,anc L      |
| <i>pabB</i>      | folate biosynthesis                    | AZOLI_p30458 | AZL_c04970 | –               | anc M                  |
| –                | folate biosynthesis                    | –            | –          | AZOBR_p230038   | anc M                  |
| <i>cobT</i>      | cobalamin biosynthesis (Vitamin B12)   | AZOLI_0359   | AZL_005060 | AZOBR_40175     | anc H,anc H,anc M      |
| <i>cobU</i>      | cobalamin biosynthesis                 | AZOLI_1242   | AZL_015930 | AZOBR_140190/92 | hor M                  |
| <i>cobO</i>      | cobalamin biosynthesis                 | AZOLI_1243   | AZL_015920 | AZOBR_140191    | hor H,hor M,hor M      |
| <i>cobQ</i>      | cobalamin biosynthesis                 | AZOLI_1244   | AZL_015910 | AZOBR_140192    | anc L,anc M,anc M      |
| <i>cobS</i>      | cobalamin biosynthesis                 | AZOLI_2951   | AZL_000760 | AZOBR_40113/109 | anc H,anc H,anc M      |
| <i>cobT</i>      | cobalamin biosynthesis                 | AZOLI_2953   | AZL_000750 | AZOBR_40109     | anc H                  |
| <i>bluB</i>      | cobalamin biosynthesis                 | AZOLI_p40236 | AZL_d03400 | AZOBR_p140044   | anc M,anc M,unassigned |
| <i>cobB</i>      | cobalamin biosynthesis                 | AZOLI_p40237 | AZL_d03390 | AZOBR_p140043   | unassigned,anc M,hor H |
| <i>cobA</i>      | cobalamin biosynthesis                 | AZOLI_p40238 | AZL_d03380 | AZOBR_p140042   | hor M                  |
| <i>cbiD</i>      | cobalamin biosynthesis                 | AZOLI_p40239 | AZL_d03370 | AZOBR_p140041   | anc M                  |

|              |                                                      |              |            |               |                        |
|--------------|------------------------------------------------------|--------------|------------|---------------|------------------------|
| <i>cobM</i>  | cobalamin biosynthesis                               | AZOLI_p40240 | AZL_d03360 | AZOBR_p140040 | hor M                  |
| <i>cobE</i>  | cobalamin biosynthesis                               | AZOLI_p40241 | AZL_d03350 | AZOBR_p140039 | unassigned,hor M,hor H |
| <i>cobL</i>  | cobalamin biosynthesis                               | AZOLI_p40242 | AZL_d03340 | AZOBR_p140038 | anc M,anc L,anc M      |
| <i>cobK</i>  | cobalamin biosynthesis                               | AZOLI_p40243 | AZL_d03330 | AZOBR_p140037 | hor M                  |
| <i>cobJ</i>  | cobalamin biosynthesis                               | AZOLI_p40244 | AZL_d03320 | AZOBR_p140036 | anc L,anc L,hor M      |
| <i>cobI</i>  | cobalamin biosynthesis                               | AZOLI_p40245 | AZL_d03310 | AZOBR_p140035 | hor H                  |
| <i>cobH</i>  | cobalamin biosynthesis                               | AZOLI_p40246 | AZL_d03300 | AZOBR_p140033 | hor M,hor M,hor H      |
| <i>cobG</i>  | cobalamin biosynthesis                               | AZOLI_p40247 | AZL_d03290 | AZOBR_p140032 | hor H                  |
| <i>cobN</i>  | cobalamin biosynthesis                               | AZOLI_p40248 | AZL_d03280 | AZOBR_p140031 | hor L                  |
| <i>cobW</i>  | cobalamin biosynthesis                               | AZOLI_p40249 | AZL_d03270 | AZOBR_p140030 | unassigned,hor M,anc L |
| <i>cbtA</i>  | cobalamin biosynthesis                               | AZOLI_p40250 | AZL_d03260 | –             | anc L                  |
| <i>cbtB</i>  | cobalamin biosynthesis                               | AZOLI_p40251 | AZL_d03250 | –             | anc L                  |
| <i>pqqA2</i> | coenzyme PQQ biosynthesis (pyrroloquinoline quinone) | AZOLI_p10697 | –          | –             | unassigned             |
| <i>pqqA</i>  | coenzyme PQQ biosynthesis                            | –            | –          | AZOBR_p270073 | hor H                  |
| <i>pqqA1</i> | coenzyme PQQ biosynthesis                            | AZOLI_p30590 | –          | AZOBR_100324  | hor H                  |
| <i>pqqB</i>  | coenzyme PQQ biosynthesis                            | AZOLI_p30589 | AZL_a09970 | AZOBR_100323  | anc L                  |
| <i>pqqC</i>  | coenzyme PQQ biosynthesis                            | AZOLI_p30588 | AZL_a09980 | AZOBR_100322  | anc L                  |
| <i>pqqD</i>  | coenzyme PQQ biosynthesis                            | AZOLI_p30587 | AZL_a09990 | AZOBR_100321  | hor M,hor M,hor L      |
| <i>pqqE</i>  | coenzyme PQQ biosynthesis                            | AZOLI_p30586 | AZL_a10000 | AZOBR_100320  | hor L                  |

\*Unless otherwise indicated, the orthologues have the same assignment.

## References:

1. Putnoky P, Kereszt A, Nakamura T, Endre G, Grosskopf E, et al. (1998) The *pha* gene cluster of *Rhizobium meliloti* involved in pH adaptation and symbiosis encodes a novel type of K<sup>+</sup> efflux system. *Molecular Microbiology* 28: 1091-1101.
2. Peters NK, Verma DPS (1990) Phenolic-compounds as regulators of gene-expression in plant-microbe interactions. *Mol Plant Microbe In* 3: 4-8.
3. Dorr J, Hurek T, Reinhold-Hurek B (1998) Type IV pili are involved in plant-microbe and fungus-microbe interactions. *Molecular Microbiology* 30: 7-17.
4. Lugtenberg B, Kamilova F (2009) Plant-growth-promoting rhizobacteria. *Annual Review of Microbiology* 63: 541-556.
5. Meneses CH, Rouws LF, Simoes-Araujo JL, Vidal MS, Baldani JI (2011) Exopolysaccharide production is required for biofilm formation and plant colonization by the nitrogen-fixing endophyte *Gluconacetobacter diazotrophicus*. *Mol Plant Microbe Interact*.
6. Tegos G, Stermitz FR, Lomovskaya O, Lewis K (2002) Multidrug pump inhibitors uncover remarkable activity of plant antimicrobials. *Antimicrob Agents Ch* 46: 3133-3141.

7. Jimenez-Zurdo JI, Mateos PF, Dazzo FB, MartinezMolina E (1996) Cell-bound cellulase and polygalacturonase production by *Rhizobium* and *Bradyrhizobium* species. *Soil Biol Biochem* 28: 917-921.
8. Dobbelaere S, Croonenborghs A, Thys A, Vande Broek A, Vanderleyden J (1999) Phytostimulatory effect of *Azospirillum brasilense* wild type and mutant strains altered in IAA production on wheat. *Plant Soil* 212: 155-164.
9. Sy A, Timmers ACJ, Knief C, Vorholt JA (2005) Methylo-trophic metabolism is advantageous for *Methylobacterium extorquens* during colonization of *Medicago truncatula* under competitive conditions. *Appl Environ Microb* 71: 7245-7252.
10. Zhang F, Dashti N, Hynes RK, Smith DL (1996) Plant growth promoting rhizobacteria and soybean [*Glycine max* (L) Merr] nodulation and nitrogen fixation at suboptimal root zone temperatures. *Ann Bot-London* 77: 453-459.
11. Zargar MY, Kahlon RS (1995) Comparison of symbiotic effectiveness of *Rhizobium* sp with positive hydrogen-uptake activity compared with negative mutants in relation to nitrogen-fixation in Mungbean (*Vigna radiata* L). *Biol Fert Soils* 20: 270-274.
12. Savka MA, Farrand SK (1997) Modification of rhizobacterial populations by engineering bacterium utilization of a novel plant-produced resource. *Nat Biotechnol* 15: 363-368.
13. Cassan F, Maiale S, Masciarelli O, Vidal A, Luna V, et al. (2009) Cadaverine production by *Azospirillum brasilense* and its possible role in plant growth promotion and osmotic stress mitigation. *Eur J Soil Biol* 45: 12-19.
14. Matilla MA, Espinosa-Urgel M, Rodriguez-Herva JJ, Ramos JL, Ramos-Gonzalez MI (2007) Genomic analysis reveals the major driving forces of bacterial life in the rhizosphere. *Genome Biology* 8.
15. Fallik E, Okon Y (1996) Inoculants of *Azospirillum brasilense*: Biomass production, survival and growth promotion of *Setaria italica* and *Zea mays*. *Soil Biol Biochem* 28: 123-126.
16. Bender CL, Rangaswamy V, Loper J (1999) Polyketide production by plant-associated pseudomonads. *Annu Rev Phytopathol* 37: 175-196.
17. Berg G (2009) Plant-microbe interactions promoting plant growth and health: perspectives for controlled use of microorganisms in agriculture. *Appl Microbiol Biot* 84: 11-18.
18. Oresnik IJ, Twelker S, Hynes MF (1999) Cloning and characterization of a *Rhizobium leguminosarum* gene encoding a bacteriocin with similarities to RTX toxins. *Appl Environ Microb* 65: 2833-2840.
19. Molina MA, Godoy P, Ramos-Gonzalez MI, Munoz N, Ramos JL, et al. (2005) Role of iron and the TonB system in colonization of corn seeds and roots by *Pseudomonas putida* KT2440. *Environmental Microbiology* 7: 443-449.
20. Filloux A, Hachani A, Bleves S (2008) The bacterial type VI secretion machine: yet another player for protein transport across membranes. *Microbiol-Sgm* 154: 1570-1583.
21. Marek-Kozaczuk M, Skorupska A (2001) Production of B-group vitamins by plant growth-promoting *Pseudomonas fluorescens* strain 267 and the importance of vitamins in the colonization and nodulation of red clover. *Biol Fert Soils* 33: 146-151.
