# Supplementary material for: Azospirillum Genomes Reveal Transition of Bacteria from Aquatic to Terrestrial Environments
Source: PubMed Central journal article supplement (PMC3245306; doi:10.1371/journal.pgen.1002430), 2011-12-22
Supplement: pgen.1002430.s011.pdf [file pgen.1002430.s011.pdf]

**Table S8.** Divergence in the 16S rRNA gene between *Azospirillum lipoferum* 4B and other members of *Rhodospirillaceae*

| <b><i>Azospirillum lipoferum</i> 4B</b>       |         |
|-----------------------------------------------|---------|
| <i>Azospirillum</i> sp. B510                  | 2.16 %  |
| <i>Azospirillum brasilense</i> Sp245          | 2.98 %  |
| <i>Rhodospirillum centenum</i> SW             | 8.03 %  |
| <i>Nisaea</i> sp. BAL 199                     | 9.18 %  |
| <i>Magnetospirillum magnetotacticum</i> MS-1  | 9.34 %  |
| <i>Magnetospirillum magneticum</i> AMB-1      | 9.46 %  |
| <i>Magnetospirillum gryphiswaldense</i> MSR-1 | 10.12 % |
| <i>Rhodospirillum rubrum</i> ATCC 11170       | 10.93 % |
