# Supplementary material for: Azospirillum Genomes Reveal Transition of Bacteria from Aquatic to Terrestrial Environments
Source: PubMed Central journal article supplement (PMC3245306; doi:10.1371/journal.pgen.1002430), 2011-12-22
Supplement: pgen.1002430.s012.pdf [file pgen.1002430.s012.pdf]

**Table S9.** Proteomic analysis of *Azospirillum*

| Locus Tag (4B) | Control Condition                                           | Nitrogen Fixation Condition                                 | Locus Tag (Sp245) | Control Condition                                           | Nitrogen Fixation Condition                                 |
|----------------|-------------------------------------------------------------|-------------------------------------------------------------|-------------------|-------------------------------------------------------------|-------------------------------------------------------------|
| AZOLI_0001     | 1: 0.00434, 2: 0.00903, 3: 0.00685, 4: 0.00601,             | 1: 0.01254, 2: 0.01002, 3: 0.00861, 4: 0.00796,             | AZOBR_10006       | 1: 0.00010, 2: 0.00009, 3: 0.00011, 4: 0.00011, 5: 0.00011, | 1: 0.00038, 2: 0.00024, 3: 0.00051,                         |
| AZOLI_0002     | 1: 0.00009, 2: 0.00007, 4: 0.00009,                         | 1: 0.00004, 3: 0.00005,                                     | AZOBR_10008       | 4: 0.00005,                                                 |                                                             |
| AZOLI_0005     | 2: 0.00009, 4: 0.00012,                                     |                                                             | AZOBR_10014       | 2: 0.00053, 4: 0.00028, 5: 0.00042,                         | 2: 0.00088, 3: 0.00038,                                     |
| AZOLI_0006     | 1: 0.00021, 2: 0.00016, 4: 0.00046,                         | 1: 0.00070, 2: 0.00046, 3: 0.00074, 4: 0.00041,             | AZOBR_10015       | 4: 0.00013,                                                 |                                                             |
| AZOLI_0008     | 2: 0.00024,                                                 | 4: 0.00013,                                                 | AZOBR_10018       | 1: 0.00076, 2: 0.00048, 3: 0.00148, 4: 0.00037, 5: 0.00082, | 2: 0.00032, 3: 0.00020,                                     |
| AZOLI_0009     | 1: 0.00010, 4: 0.00022,                                     |                                                             | AZOBR_10019       | 1: 0.00205, 2: 0.00164, 3: 0.00158, 4: 0.00154, 5: 0.00128, | 1: 0.00119, 2: 0.00108, 3: 0.00104,                         |
| AZOLI_0011     | 1: 0.00023, 2: 0.00026, 4: 0.00012,                         | 1: 0.00012, 2: 0.00017, 3: 0.00009, 4: 0.00010,             | AZOBR_10022       | 1: 0.00068, 2: 0.00088, 3: 0.00062, 4: 0.00094, 5: 0.00103, | 1: 0.00049, 2: 0.00043, 3: 0.00056,                         |
| AZOLI_0024     | 1: 0.00008, 2: 0.00008,                                     | 1: 0.00019, 2: 0.00012, 3: 0.00020, 4: 0.00014,             | AZOBR_10023       | 2: 0.00014, 4: 0.00011,                                     | 2: 0.00022, 3: 0.00014, 1: 0.00128, 2: 0.00117, 3: 0.00212, |
| AZOLI_0026     | 2: 0.00044,                                                 | 2: 0.00028, 4: 0.00025,                                     | AZOBR_10024       |                                                             | 1: 0.01080, 2: 0.00806, 3: 0.00862,                         |
| AZOLI_0028     | 1: 0.00021, 2: 0.00071, 3: 0.00111, 4: 0.00041,             | 1: 0.00048, 2: 0.00049, 3: 0.00056, 4: 0.00050,             | AZOBR_10026       | 2: 0.00014, 3: 0.00020, 4: 0.00018, 5: 0.00016,             | 1: 0.00048, 2: 0.00034, 3: 0.00069,                         |
| AZOLI_0032     |                                                             | 3: 0.00028, 4: 0.00022,                                     | AZOBR_10027       |                                                             | 1: 0.00651, 2: 0.00458, 3: 0.00508,                         |
| AZOLI_0033     | 1: 0.00007, 4: 0.00012,                                     |                                                             | AZOBR_10028       | 2: 0.00008, 3: 0.00008, 4: 0.00025, 5: 0.00019,             | 3: 0.00008,                                                 |
| AZOLI_0034     | 1: 0.00015, 4: 0.00030,                                     | 2: 0.00011, 4: 0.00010,                                     | AZOBR_10031       |                                                             |                                                             |
| AZOLI_0036     | 1: 0.00019, 2: 0.00020, 3: 0.00022, 4: 0.00030,             | 3: 0.00017, 4: 0.00010,                                     | AZOBR_10032       | 1: 0.00005, 3: 0.00005, 4: 0.00006, 5: 0.00004,             | 2: 0.00004, 3: 0.00002,                                     |
| AZOLI_0049     | 2: 0.00020, 3: 0.00021, 4: 0.00009,                         | 1: 0.00035, 2: 0.00010, 3: 0.00027,                         | AZOBR_10035       | 1: 0.00011, 2: 0.00016, 3: 0.00014, 4: 0.00007,             | 2: 0.00004,                                                 |
| AZOLI_0051     | 1: 0.00012, 2: 0.00018, 4: 0.00015,                         | 1: 0.00018,                                                 | AZOBR_10036       | 2: 0.00112, 3: 0.00139, 4: 0.00112, 5: 0.00050,             |                                                             |
| AZOLI_0054     |                                                             | 2: 0.00008,                                                 | AZOBR_10037       |                                                             | 1: 0.00011, 2: 0.00009, 3: 0.00011,                         |
| AZOLI_0056     | 2: 0.00019, 4: 0.00022,                                     | 3: 0.00021, 4: 0.00033,                                     | AZOBR_10039       | 2: 0.00046, 3: 0.00045,                                     |                                                             |
| AZOLI_0057     | 1: 0.00009, 2: 0.00011, 4: 0.00023,                         | 2: 0.00007, 3: 0.00007,                                     | AZOBR_10040       | 1: 0.00063, 2: 0.00110, 3: 0.00065, 4: 0.00095, 5: 0.00088, | 1: 0.00098, 2: 0.00065, 3: 0.00068,                         |
| AZOLI_0060     | 1: 0.00014, 2: 0.00014, 4: 0.00032,                         | 2: 0.00018, 3: 0.00020, 4: 0.00008,                         | AZOBR_10041       |                                                             |                                                             |
| AZOLI_0061     | 1: 0.00012, 2: 0.00012, 4: 0.00075,                         | 3: 0.00012, 4: 0.00015,                                     | AZOBR_10043       | 1: 0.00027, 2: 0.00012, 3: 0.00025, 4: 0.00027, 5: 0.00014, | 1: 0.00008, 2: 0.00007, 3: 0.00006,                         |
| AZOLI_0064     | 1: 0.00006, 4: 0.00013,                                     | 2: 0.00006, 3: 0.00010, 4: 0.00013,                         | AZOBR_10045       | 3: 0.00012, 4: 0.00029, 5: 0.00013,                         |                                                             |
| AZOLI_0066     | 4: 0.00016,                                                 |                                                             | AZOBR_10046       |                                                             |                                                             |
| AZOLI_0067     | 1: 0.00022, 2: 0.00031, 3: 0.00009, 4: 0.00019,             | 1: 0.00023, 2: 0.00026, 3: 0.00033, 4: 0.00030,             | AZOBR_10047       | 4: 0.00070, 5: 0.00042,                                     | 3: 0.00051,                                                 |
| AZOLI_0069     | 1: 0.00007, 4: 0.00006, 1: 0.00035, 2: 0.00045, 4: 0.00045, | 4: 0.00009, 1: 0.00068, 2: 0.00085, 3: 0.00096, 4: 0.00053, | AZOBR_10049       | 1: 0.00027, 2: 0.00024, 3: 0.00036, 4: 0.00036, 5: 0.00022, | 1: 0.00091, 2: 0.00129, 3: 0.00098,                         |
| AZOLI_0077     | 1: 0.00031, 2: 0.00063, 4: 0.00120,                         | 1: 0.00220, 2: 0.00106, 3: 0.00150, 4: 0.00080,             | AZOBR_10051       |                                                             | 2: 0.00015, 3: 0.00026,                                     |
| AZOLI_0082     |                                                             | 1: 0.00024, 2: 0.00009, 3: 0.00010, 4: 0.00016,             | AZOBR_10052       | 1: 0.00077, 3: 0.00039, 4: 0.00074, 5: 0.00075,             | 1: 0.00020, 2: 0.00067, 3: 0.00086,                         |
| AZOLI_0086     |                                                             | 1: 0.00052, 2: 0.00050, 3: 0.00042, 4: 0.00044,             | AZOBR_10053       | 1: 0.00012, 2: 0.00019, 3: 0.00021, 4: 0.00019, 5: 0.00013, | 1: 0.00034, 2: 0.00025, 3: 0.00050,                         |
| AZOLI_0087     |                                                             | 1: 0.00009, 2: 0.00012, 3: 0.00010, 4: 0.00014, 5: 0.00016, | AZOBR_10054       | 1: 0.00009, 2: 0.00012, 3: 0.00010, 4: 0.00014, 5: 0.00016, | 1: 0.00054, 2: 0.00025, 3: 0.00044,                         |
| AZOLI_0088     | 1: 0.00195, 2: 0.00188, 3: 0.00282, 4: 0.00149,             | 1: 0.00203, 2: 0.00191, 3: 0.00229, 4: 0.00385,             | AZOBR_10056       | 1: 0.00075, 2: 0.00050, 3: 0.00032, 4: 0.00010, 5: 0.00029, | 1: 0.00018, 2: 0.00027, 3: 0.00041,                         |
| AZOLI_0089     | 1: 0.00011, 2: 0.00019, 3: 0.00072,                         | 1: 0.00164, 2: 0.00151, 3: 0.00138, 4: 0.00162,             | AZOBR_10058       | 1: 0.00008, 3: 0.00010,                                     |                                                             |
| AZOLI_0090     | 3: 0.00011,                                                 | 1: 0.00047, 2: 0.00058, 3: 0.00054, 4: 0.00052,             | AZOBR_10060       |                                                             |                                                             |
| AZOLI_0096     | 2: 0.00008, 4: 0.00014,                                     | 1: 0.00008, 2: 0.00012, 4: 0.00025,                         | AZOBR_10061       | 3: 0.00006,                                                 |                                                             |
| AZOLI_0106     | 1: 0.00103, 2: 0.00225, 3: 0.00217, 4: 0.00281,             | 1: 0.00052, 2: 0.00234, 3: 0.00129, 4: 0.00148,             | AZOBR_10062       |                                                             | 2: 0.00007, 3: 0.00019,                                     |
| AZOLI_0107     | 1: 0.00432, 2: 0.00343, 3: 0.00298, 4: 0.00381,             | 1: 0.00326, 2: 0.00305, 3: 0.00326, 4: 0.00246,             | AZOBR_10063       | 3: 0.00007,                                                 | 2: 0.00012, 3: 0.00005,                                     |
| AZOLI_0108     | 1: 0.00035, 2: 0.00023, 3: 0.00040, 4: 0.00058,             | 1: 0.00048, 2: 0.00019, 3: 0.00058, 4: 0.00039,             | AZOBR_10070       |                                                             |                                                             |
| AZOLI_0109     | 1: 0.00037, 2: 0.00063, 3: 0.00069, 4: 0.00055,             | 1: 0.00019, 2: 0.00026, 3: 0.00045, 4: 0.00050,             | AZOBR_10071       |                                                             | 3: 0.00008,                                                 |
| AZOLI_0111     | 2: 0.00029,                                                 | 2: 0.00019, 3: 0.00031,                                     | AZOBR_10074       |                                                             | 1: 0.00002,                                                 |
| AZOLI_0113     | 4: 0.00009,                                                 |                                                             | AZOBR_10081       | 1: 0.00110, 2: 0.00101, 3: 0.00082, 4: 0.00127, 5: 0.00076, | 1: 0.00200, 2: 0.00161, 3: 0.00140,                         |
| AZOLI_0114     | 4: 0.00009,                                                 |                                                             | AZOBR_10083       | 5: 0.00011,                                                 |                                                             |
| AZOLI_0118     | 1: 0.00040, 2: 0.00019, 3: 0.00008, 4: 0.00016,             | 1: 0.00029, 2: 0.00020, 3: 0.00018, 4: 0.00024,             | AZOBR_10089       |                                                             | 1: 0.00021, 2: 0.00024, 3: 0.00056,                         |
| AZOLI_0120     |                                                             | 3: 0.00004,                                                 | AZOBR_10090       | 1: 0.00033, 3: 0.00011, 4: 0.00041, 5: 0.00050,             | 1: 0.00013,                                                 |
| AZOLI_0126     | 1: 0.00044, 4: 0.00038,                                     |                                                             | AZOBR_10093       |                                                             | 1: 0.00017,                                                 |
| AZOLI_0131     | 1: 0.00015, 4: 0.00010,                                     | 3: 0.00008, 4: 0.00013,                                     | AZOBR_10095       | 2: 0.00022, 4: 0.00022, 5: 0.00013,                         |                                                             |
| AZOLI_0134     |                                                             | 2: 0.00011, 3: 0.00023, 4: 0.00014,                         | AZOBR_10096       |                                                             |                                                             |

|            |                                                    |                                                    |             |                                                                |                                        |
|------------|----------------------------------------------------|----------------------------------------------------|-------------|----------------------------------------------------------------|----------------------------------------|
| AZOLI_0135 | 3: 0.00051,                                        | 1: 0.00047, 2: 0.00046,<br>3: 0.00039, 4: 0.00022, | AZOBR_10097 | 3: 0.00015, 5: 0.00018,                                        | 1: 0.00033, 3: 0.00053,                |
| AZOLI_0137 | 1: 0.00018, 2: 0.00018,<br>4: 0.00067,             | 1: 0.00031, 2: 0.00035,<br>3: 0.00039, 4: 0.00016, | AZOBR_10099 | 3: 0.00023, 4: 0.00009,                                        |                                        |
| AZOLI_0139 |                                                    | 1: 0.00022, 3: 0.00016,<br>4: 0.00006,             | AZOBR_10100 | 2: 0.00011,                                                    | 2: 0.00009, 3: 0.00011,                |
| AZOLI_0140 | 2: 0.00015, 3: 0.00262,<br>4: 0.00032,             | 1: 0.00121, 2: 0.00182,<br>3: 0.00176, 4: 0.00212, | AZOBR_10101 |                                                                |                                        |
| AZOLI_0141 | 1: 0.00015, 2: 0.00013,<br>3: 0.00031, 4: 0.00016, | 1: 0.00070, 2: 0.00059,<br>3: 0.00068, 4: 0.00066, | AZOBR_10102 | 1: 0.00007, 3: 0.00011, 4: 0.00007,                            |                                        |
| AZOLI_0141 | 3: 0.00013,                                        | 1: 0.00045, 2: 0.00065,<br>3: 0.00043, 4: 0.00042, | AZOBR_10103 | 2: 0.00012, 4: 0.00024, 5: 0.00015,                            |                                        |
| AZOLI_0142 | 1: 0.00025,                                        | 2: 0.00016, 3: 0.00009,<br>4: 0.00011,             | AZOBR_10104 | 1: 0.00056, 2: 0.00104, 3: 0.00091,<br>4: 0.00053, 5: 0.00056, | 1: 0.00079, 2: 0.00074,<br>3: 0.00067, |
| AZOLI_0145 |                                                    | 1: 0.00018, 2: 0.00017,<br>3: 0.00013,             | AZOBR_10105 | 1: 0.00011, 2: 0.00013, 3: 0.00027,<br>4: 0.00025, 5: 0.00022, | 1: 0.00018, 2: 0.00010,<br>3: 0.00007, |
| AZOLI_0146 | 3: 0.00010,                                        | 1: 0.00011, 2: 0.00008,<br>3: 0.00004, 4: 0.00005, | AZOBR_10109 |                                                                |                                        |
| AZOLI_0155 | 1: 0.00004,                                        | 2: 0.00010, 3: 0.00006,                            | AZOBR_10112 |                                                                |                                        |
| AZOLI_0156 | 1: 0.00019, 2: 0.00013,<br>3: 0.00027, 4: 0.00055, | 1: 0.00039, 2: 0.00044,<br>3: 0.00069, 4: 0.00022, | AZOBR_10113 | 4: 0.00016, 5: 0.00011,                                        | 1: 0.00015, 2: 0.00011,<br>3: 0.00025, |
| AZOLI_0157 | 1: 0.00027, 2: 0.00016,<br>4: 0.00069,             |                                                    | AZOBR_10114 | 1: 0.00013, 3: 0.00018, 5: 0.00012,                            |                                        |
| AZOLI_0164 | 1: 0.00021, 2: 0.00007,<br>4: 0.00009,             | 4: 0.00006,                                        | AZOBR_10116 | 3: 0.00022,                                                    | 1: 0.00017, 2: 0.00013,<br>3: 0.00011, |
| AZOLI_0170 | 2: 0.00044, 3: 0.00037,<br>4: 0.00023,             | 1: 0.00053, 2: 0.00025,<br>3: 0.00037, 4: 0.00030, | AZOBR_10118 | 3: 0.00024, 4: 0.00023, 5: 0.00023,                            | 1: 0.00011, 3: 0.00024,                |
| AZOLI_0172 | 1: 0.00054, 2: 0.00045,<br>3: 0.00056, 4: 0.00045, | 1: 0.00040, 2: 0.00063,<br>3: 0.00069, 4: 0.00036, | AZOBR_10124 | 1: 0.00149, 2: 0.00359, 3: 0.00127,<br>4: 0.00224, 5: 0.00234, | 1: 0.00252, 2: 0.00277,<br>3: 0.00287, |
| AZOLI_0173 | 1: 0.00059, 2: 0.00103,<br>3: 0.00041, 4: 0.00071, | 1: 0.00158, 2: 0.00143,<br>3: 0.00089, 4: 0.00059, | AZOBR_10128 | 1: 0.00011,                                                    |                                        |
| AZOLI_0174 | 1: 0.00410, 2: 0.00460,<br>3: 0.00488, 4: 0.00378, | 1: 0.00259, 2: 0.00235,<br>3: 0.00233, 4: 0.00291, | AZOBR_10131 | 1: 0.00116, 2: 0.00038, 3: 0.00124,<br>4: 0.00030, 5: 0.00020, | 1: 0.00037, 2: 0.00085,<br>3: 0.00054, |
| AZOLI_0178 | 1: 0.00002, 4: 0.00002,                            |                                                    | AZOBR_10132 |                                                                | 3: 0.00007,                            |
| AZOLI_0179 | 2: 0.00005,                                        |                                                    | AZOBR_10134 | 1: 0.00067, 2: 0.00068, 3: 0.00082,<br>4: 0.00093, 5: 0.00056, | 1: 0.00040, 2: 0.00056,<br>3: 0.00030, |
| AZOLI_0181 | 1: 0.00111, 2: 0.00095,<br>3: 0.00218, 4: 0.00116, | 1: 0.00102, 2: 0.00139,<br>3: 0.00131, 4: 0.00157, | AZOBR_10135 | 4: 0.00034, 5: 0.00025,                                        |                                        |
| AZOLI_0192 |                                                    | 2: 0.00003,                                        | AZOBR_10141 | 1: 0.00063, 2: 0.00129, 3: 0.00049,<br>4: 0.00101, 5: 0.00119, | 1: 0.00432, 2: 0.00316,<br>3: 0.00331, |
| AZOLI_0193 | 3: 0.00122,                                        | 1: 0.00387, 2: 0.00373,<br>3: 0.00611, 4: 0.00461, | AZOBR_10142 |                                                                | 2: 0.00008, 3: 0.00007,                |
| AZOLI_0194 | 4: 0.00028,                                        | 1: 0.00951, 2: 0.01136,<br>3: 0.01457, 4: 0.00838, | AZOBR_10146 |                                                                |                                        |
| AZOLI_0199 | 1: 0.00033, 2: 0.00025,<br>3: 0.00183, 4: 0.00077, | 1: 0.00173, 2: 0.00167,<br>3: 0.00166, 4: 0.00155, | AZOBR_10154 |                                                                |                                        |
| AZOLI_0201 | 4: 0.00005,                                        |                                                    | AZOBR_10157 |                                                                | 1: 0.00004, 2: 0.00004,                |
| AZOLI_0204 | 1: 0.00007, 2: 0.00016,<br>3: 0.00063, 4: 0.00017, | 1: 0.00044, 2: 0.00027,<br>3: 0.00038, 4: 0.00035, | AZOBR_10160 | 1: 0.00032, 2: 0.00056, 3: 0.00054,<br>4: 0.00044, 5: 0.00029, | 1: 0.00020, 2: 0.00062,<br>3: 0.00119, |
| AZOLI_0205 | 1: 0.00163, 2: 0.00263,<br>3: 0.00772, 4: 0.00208, | 1: 0.00237, 2: 0.00289,<br>3: 0.00238, 4: 0.00255, | AZOBR_10161 | 4: 0.00028, 5: 0.00021,                                        | 1: 0.00026, 2: 0.00059,<br>3: 0.00025, |
| AZOLI_0206 | 1: 0.00173, 2: 0.00152,<br>3: 0.00384, 4: 0.00243, | 1: 0.00297, 2: 0.00244,<br>3: 0.00284, 4: 0.00297, | AZOBR_10162 | 4: 0.00005, 5: 0.00003,                                        | 1: 0.00015, 3: 0.00005,                |
| AZOLI_0207 | 1: 0.00320, 2: 0.00287,<br>3: 0.01168, 4: 0.00321, | 1: 0.00684, 2: 0.00618,<br>3: 0.00792, 4: 0.00701, | AZOBR_10163 | 1: 0.00032, 2: 0.00053, 3: 0.00063,<br>4: 0.00056, 5: 0.00066, | 1: 0.00054, 2: 0.00051,<br>3: 0.00053, |
| AZOLI_0208 | 1: 0.00014, 2: 0.00035,<br>4: 0.00036,             | 1: 0.00063, 2: 0.00027,<br>3: 0.00067, 4: 0.00048, | AZOBR_10166 | 4: 0.00005,                                                    |                                        |
| AZOLI_0212 | 1: 0.00013, 3: 0.00006,<br>4: 0.00004,             | 1: 0.00009, 3: 0.00005,<br>4: 0.00013,             | AZOBR_10167 | 1: 0.00088, 2: 0.00120, 3: 0.00143,<br>4: 0.00055, 5: 0.00061, | 1: 0.00077, 2: 0.00070,<br>3: 0.00074, |
| AZOLI_0215 | 2: 0.00014,                                        |                                                    | AZOBR_10172 | 4: 0.00010,                                                    |                                        |
| AZOLI_0218 | 1: 0.00021, 2: 0.00020,<br>3: 0.00035, 4: 0.00018, | 1: 0.00039, 2: 0.00049,<br>3: 0.00048, 4: 0.00041, | AZOBR_10173 | 2: 0.00007, 4: 0.00014, 5: 0.00025,                            | 1: 0.00008, 2: 0.00006,<br>3: 0.00012, |
| AZOLI_0219 | 1: 0.00140, 2: 0.00167,<br>3: 0.00203, 4: 0.00251, | 1: 0.00228, 2: 0.00196,<br>3: 0.00211, 4: 0.00300, | AZOBR_10174 |                                                                | 3: 0.00013,                            |
| AZOLI_0220 | 1: 0.00019, 2: 0.00025,<br>3: 0.00077, 4: 0.00028, | 1: 0.00022, 2: 0.00021,<br>3: 0.00027, 4: 0.00026, | AZOBR_10175 | 1: 0.00014, 2: 0.00009, 3: 0.00009,<br>4: 0.00012, 5: 0.00010, | 1: 0.00005, 2: 0.00008,                |
| AZOLI_0227 | 1: 0.00008, 2: 0.00030,<br>4: 0.00018,             | 1: 0.00009,                                        | AZOBR_10176 |                                                                |                                        |
| AZOLI_0229 |                                                    | 4: 0.00012,                                        | AZOBR_10178 | 2: 0.00006, 4: 0.00009,                                        |                                        |
| AZOLI_0230 | 3: 0.00024, 4: 0.00022,                            | 1: 0.00047, 2: 0.00071,<br>3: 0.00046, 4: 0.00077, | AZOBR_10179 |                                                                |                                        |
| AZOLI_0233 | 1: 0.00018, 4: 0.00038,                            |                                                    | AZOBR_10180 | 1: 0.00012, 3: 0.00012, 4: 0.00010,                            | 2: 0.00007, 3: 0.00006,                |
| AZOLI_0236 | 2: 0.00034, 3: 0.00016,<br>4: 0.00025,             | 1: 0.00023, 2: 0.00022,<br>3: 0.00024, 4: 0.00020, | AZOBR_10184 |                                                                | 3: 0.00011,                            |
| AZOLI_0237 | 3: 0.00009,                                        | 1: 0.00064, 2: 0.00054,<br>3: 0.00064, 4: 0.00057, | AZOBR_10185 |                                                                | 1: 0.00004,                            |
| AZOLI_0241 | 1: 0.00259, 2: 0.00174,<br>3: 0.00086, 4: 0.00306, | 1: 0.00077, 2: 0.00059,<br>3: 0.00114, 4: 0.00070, | AZOBR_10186 |                                                                | 2: 0.00011, 3: 0.00019,                |
| AZOLI_0252 | 1: 0.00018, 2: 0.00031,<br>3: 0.00025, 4: 0.00028, | 1: 0.00010, 2: 0.00007,<br>3: 0.00008, 4: 0.00015, | AZOBR_10190 | 1: 0.00026, 3: 0.00022, 4: 0.00033,<br>5: 0.00021,             | 1: 0.00030, 2: 0.00022,<br>3: 0.00032, |
| AZOLI_0253 | 1: 0.00019, 2: 0.00029,<br>3: 0.00101, 4: 0.00045, | 1: 0.00059, 2: 0.00064,<br>3: 0.00071, 4: 0.00084, | AZOBR_10191 | 1: 0.00029, 2: 0.00036, 3: 0.00035,<br>4: 0.00031, 5: 0.00017, | 1: 0.00005, 2: 0.00009,<br>3: 0.00013, |
| AZOLI_0254 | 4: 0.00008,                                        | 4: 0.00008,                                        | AZOBR_10192 | 1: 0.00319, 2: 0.00594, 3: 0.00312,<br>4: 0.00333, 5: 0.00497, | 1: 0.00423, 2: 0.00258,<br>3: 0.00242, |
| AZOLI_0255 | 1: 0.00094, 2: 0.00048,<br>3: 0.00082, 4: 0.00053, | 1: 0.00044, 2: 0.00060,<br>3: 0.00062, 4: 0.00069, | AZOBR_10193 | 1: 0.00704, 2: 0.00272, 3: 0.00880,<br>4: 0.00424, 5: 0.00470, | 1: 0.00268, 2: 0.00224,<br>3: 0.00273, |
| AZOLI_0256 | 3: 0.00009,                                        |                                                    | AZOBR_10194 |                                                                |                                        |
| AZOLI_0257 | 1: 0.00013,                                        | 1: 0.00020, 4: 0.00009,                            | AZOBR_10197 |                                                                |                                        |
| AZOLI_0262 | 2: 0.00003, 4: 0.00002,                            |                                                    | AZOBR_10202 |                                                                | 3: 0.00022,                            |
| AZOLI_0264 |                                                    | 4: 0.00021,                                        | AZOBR_10204 | 1: 0.00040, 2: 0.00117, 3: 0.00079,                            | 1: 0.00085, 2: 0.00086,                |

|            |                                                 |                                                 |             |                                                             |                                                             |
|------------|-------------------------------------------------|-------------------------------------------------|-------------|-------------------------------------------------------------|-------------------------------------------------------------|
|            |                                                 |                                                 |             | 4: 0.00091, 5: 0.00073,                                     | 3: 0.00131,                                                 |
| AZOLI_0272 | 1: 0.00015, 2: 0.00007, 4: 0.00038,             | 1: 0.00007, 3: 0.00012, 4: 0.00006,             | AZOBR_10208 |                                                             |                                                             |
| AZOLI_0274 | 4: 0.00015,                                     | 2: 0.00014, 3: 0.00008, 4: 0.00006,             | AZOBR_10209 | 2: 0.00045, 3: 0.00044, 4: 0.00021, 5: 0.00014,             | 1: 0.00295, 2: 0.00454, 3: 0.00489,                         |
| AZOLI_0275 | 1: 0.00056, 2: 0.00030, 3: 0.00017, 4: 0.00020, | 1: 0.00033, 2: 0.00011, 3: 0.00060, 4: 0.00048, | AZOBR_10213 | 5: 0.00009,                                                 | 1: 0.00032, 2: 0.00009, 3: 0.00012,                         |
| AZOLI_0277 |                                                 | 4: 0.00010,                                     | AZOBR_10214 | 1: 0.00022, 2: 0.00024, 3: 0.00015, 4: 0.00025, 5: 0.00015, | 1: 0.00029, 2: 0.00042, 3: 0.00030,                         |
| AZOLI_0279 | 1: 0.00743, 2: 0.00646, 3: 0.01432, 4: 0.00778, | 1: 0.01020, 2: 0.01082, 3: 0.01018, 4: 0.01185, | AZOBR_10215 | 1: 0.00025, 2: 0.00018, 3: 0.00029, 4: 0.00033, 5: 0.00024, | 1: 0.00015, 2: 0.00008, 3: 0.00033,                         |
| AZOLI_0280 | 1: 0.00040, 2: 0.00056, 3: 0.00070, 4: 0.00039, | 1: 0.00010, 2: 0.00034, 3: 0.00011, 4: 0.00086, | AZOBR_10216 |                                                             | 1: 0.00005,                                                 |
| AZOLI_0281 |                                                 | 1: 0.00010, 2: 0.00007, 3: 0.00007, 4: 0.00006, | AZOBR_10217 |                                                             |                                                             |
| AZOLI_0285 | 1: 0.00004, 4: 0.00005,                         | 3: 0.00004, 4: 0.00006,                         | AZOBR_10218 | 1: 0.00020, 2: 0.00045, 3: 0.00034, 4: 0.00069, 5: 0.00042, |                                                             |
| AZOLI_0288 | 2: 0.00018, 3: 0.00037, 4: 0.00015,             | 1: 0.00026, 2: 0.00030, 3: 0.00019, 4: 0.00015, | AZOBR_10223 |                                                             |                                                             |
| AZOLI_0290 | 2: 0.00015,                                     |                                                 | AZOBR_10228 | 5: 0.00002,                                                 |                                                             |
| AZOLI_0294 | 1: 0.00027, 2: 0.00032, 4: 0.00020,             | 1: 0.00008, 2: 0.00019, 4: 0.00017,             | AZOBR_10229 |                                                             | 3: 0.00065,                                                 |
| AZOLI_0295 | 1: 0.00022, 2: 0.00013, 3: 0.00025, 4: 0.00023, | 2: 0.00047, 3: 0.00024, 4: 0.00011,             | AZOBR_10231 |                                                             |                                                             |
| AZOLI_0296 | 4: 0.00016,                                     | 2: 0.00012, 4: 0.00016,                         | AZOBR_10233 | 3: 0.00009, 4: 0.00005,                                     | 1: 0.00007,                                                 |
| AZOLI_0297 | 1: 0.00019, 2: 0.00012, 4: 0.00017,             | 1: 0.00016, 4: 0.00010,                         | AZOBR_10234 | 2: 0.00094, 3: 0.00083, 4: 0.00067, 5: 0.00079,             | 1: 0.00057, 2: 0.00058, 3: 0.00022,                         |
| AZOLI_0298 | 1: 0.00015, 4: 0.00026,                         |                                                 | AZOBR_10235 | 1: 0.00048, 2: 0.00085, 3: 0.00074, 4: 0.00093, 5: 0.00053, | 1: 0.00049, 2: 0.00042, 3: 0.00078,                         |
| AZOLI_0299 | 1: 0.00005, 2: 0.00005, 3: 0.00005, 4: 0.00017, | 1: 0.00087, 2: 0.00087, 3: 0.00103, 4: 0.00106, | AZOBR_10236 | 1: 0.00187, 2: 0.00289, 3: 0.00198, 4: 0.00213, 5: 0.00210, | 1: 0.00426, 2: 0.00335, 3: 0.00280,                         |
| AZOLI_0301 |                                                 | 1: 0.00008, 3: 0.00011, 4: 0.00009,             | AZOBR_10237 | 4: 0.00015,                                                 | 3: 0.00017,                                                 |
| AZOLI_0305 |                                                 | 1: 0.00012, 2: 0.00008, 4: 0.00007,             | AZOBR_10238 |                                                             |                                                             |
| AZOLI_0308 | 2: 0.00008,                                     | 1: 0.00006, 3: 0.00004,                         | AZOBR_10243 |                                                             | 3: 0.00007,                                                 |
| AZOLI_0309 | 2: 0.00036,                                     | 4: 0.00031,                                     | AZOBR_10246 | 1: 0.00017, 2: 0.00015, 3: 0.00025, 4: 0.00029, 5: 0.00017, | 1: 0.00040, 2: 0.00021, 3: 0.00057,                         |
| AZOLI_0311 |                                                 | 4: 0.00007,                                     | AZOBR_10251 |                                                             |                                                             |
| AZOLI_0313 | 2: 0.00010, 4: 0.00016,                         | 1: 0.00019, 2: 0.00018, 4: 0.00020,             | AZOBR_10254 |                                                             |                                                             |
| AZOLI_0316 | 4: 0.00042,                                     |                                                 | AZOBR_10256 |                                                             | 1: 0.00050, 2: 0.00072, 3: 0.00089,                         |
| AZOLI_0318 | 1: 0.00139, 2: 0.00089, 3: 0.00054, 4: 0.00066, | 1: 0.00034, 2: 0.00016, 3: 0.00045, 4: 0.00051, | AZOBR_10258 | 3: 0.00020, 4: 0.00012,                                     | 1: 0.00057, 2: 0.00107, 3: 0.00073,                         |
| AZOLI_0319 | 1: 0.00066, 2: 0.00066, 4: 0.00085,             | 4: 0.00028,                                     | AZOBR_10259 |                                                             |                                                             |
| AZOLI_0320 | 1: 0.00014, 2: 0.00015,                         |                                                 | AZOBR_10262 | 1: 0.00047, 2: 0.00057, 3: 0.00061, 4: 0.00035, 5: 0.00025, | 1: 0.00009, 2: 0.00018, 3: 0.00009,                         |
| AZOLI_0321 |                                                 | 3: 0.00005,                                     | AZOBR_10263 | 4: 0.00007, 5: 0.00004,                                     |                                                             |
| AZOLI_0322 | 1: 0.00006, 2: 0.00008, 3: 0.00033, 4: 0.00007, | 1: 0.00027, 2: 0.00034, 3: 0.00027, 4: 0.00024, | AZOBR_10267 | 4: 0.00025,                                                 | 1: 0.00070,                                                 |
| AZOLI_0327 | 1: 0.00061, 2: 0.00028, 3: 0.00055, 4: 0.00038, | 1: 0.00034, 2: 0.00060, 3: 0.00042, 4: 0.00029, | AZOBR_10273 |                                                             | 1: 0.00011, 3: 0.00010,                                     |
| AZOLI_0340 | 1: 0.00024, 2: 0.00033, 3: 0.00080, 4: 0.00030, | 1: 0.00091, 2: 0.00055, 3: 0.00128, 4: 0.00138, | AZOBR_10275 |                                                             |                                                             |
| AZOLI_0346 | 2: 0.00009, 4: 0.00005,                         |                                                 | AZOBR_10276 | 1: 0.00011, 2: 0.00023, 3: 0.00028, 4: 0.00013, 5: 0.00008, | 1: 0.00021, 2: 0.00013, 3: 0.00030,                         |
| AZOLI_0347 | 1: 0.00014, 2: 0.00028, 4: 0.00051,             | 1: 0.00107, 2: 0.00113, 3: 0.00132, 4: 0.00097, | AZOBR_10277 | 3: 0.00005,                                                 | 2: 0.00006,                                                 |
| AZOLI_0348 | 1: 0.00303, 2: 0.00251, 3: 0.00389, 4: 0.00595, | 1: 0.00252, 2: 0.00296, 3: 0.00178, 4: 0.00119, | AZOBR_10279 | 1: 0.01300, 2: 0.00984, 3: 0.01150, 4: 0.01860, 5: 0.01409, | 1: 0.00314, 2: 0.00295, 3: 0.00629,                         |
| AZOLI_0350 | 1: 0.00005, 2: 0.00005,                         |                                                 | AZOBR_10280 | 1: 0.00039, 2: 0.00020, 3: 0.00048, 4: 0.00027, 5: 0.00023, | 1: 0.00011, 2: 0.00033, 3: 0.00049,                         |
| AZOLI_0357 |                                                 | 1: 0.00010, 2: 0.00013, 3: 0.00012, 4: 0.00021, | AZOBR_10281 | 4: 0.00012,                                                 | 1: 0.00017, 2: 0.00013, 3: 0.00032,                         |
| AZOLI_0359 | 1: 0.00010, 3: 0.00019, 4: 0.00011,             | 1: 0.00010, 2: 0.00013, 3: 0.00025, 4: 0.00026, | AZOBR_10285 | 4: 0.00007,                                                 | 2: 0.00008, 3: 0.00007,                                     |
| AZOLI_0361 | 1: 0.00009, 2: 0.00006, 4: 0.00008,             |                                                 | AZOBR_10286 | 1: 0.00006,                                                 | 1: 0.00004,                                                 |
| AZOLI_0362 | 1: 0.00024, 2: 0.00033, 4: 0.00049,             | 1: 0.00086, 2: 0.00036, 3: 0.00074, 4: 0.00042, | AZOBR_10287 |                                                             | 1: 0.00034, 2: 0.00013, 3: 0.00022,                         |
| AZOLI_0363 | 1: 0.00043, 2: 0.00048, 4: 0.00037,             | 3: 0.00030, 4: 0.00012,                         | AZOBR_10289 | 1: 0.00424, 2: 0.00450, 3: 0.00414, 4: 0.00265, 5: 0.00357, | 1: 0.00206, 2: 0.00297, 3: 0.00156,                         |
| AZOLI_0365 | 3: 0.00006,                                     |                                                 | AZOBR_10290 | 2: 0.00008,                                                 | 1: 0.00006, 3: 0.00009,                                     |
| AZOLI_0366 | 1: 0.00013, 2: 0.00013, 4: 0.00009,             | 1: 0.00018, 2: 0.00027, 3: 0.00014, 4: 0.00022, | AZOBR_10291 | 1: 0.00003, 3: 0.00004, 4: 0.00002,                         | 2: 0.00008, 3: 0.00005,                                     |
| AZOLI_0367 | 2: 0.00022, 4: 0.00060,                         | 1: 0.00011, 2: 0.00011, 4: 0.00023,             | AZOBR_10293 | 1: 0.00031, 2: 0.00027, 3: 0.00019, 4: 0.00052, 5: 0.00027, | 2: 0.00022, 3: 0.00019,                                     |
| AZOLI_0369 | 1: 0.00005,                                     | 1: 0.00005, 2: 0.00005, 4: 0.00009,             | AZOBR_10294 | 1: 0.00043, 2: 0.00054, 3: 0.00044, 4: 0.00042,             | 1: 0.00017, 2: 0.00013, 3: 0.00016,                         |
| AZOLI_0371 | 1: 0.01332, 2: 0.00658, 3: 0.00500, 4: 0.00860, | 1: 0.00613, 2: 0.00590, 3: 0.00772, 4: 0.00538, | AZOBR_10296 | 1: 0.00021, 3: 0.00018, 4: 0.00014,                         | 1: 0.00020, 2: 0.00015, 3: 0.00020, 2: 0.00014, 3: 0.00031, |
| AZOLI_0372 |                                                 | 4: 0.00015,                                     | AZOBR_10298 | 4: 0.00060, 5: 0.00052,                                     |                                                             |
| AZOLI_0373 | 1: 0.00025, 2: 0.00008, 4: 0.00007,             | 1: 0.00013, 3: 0.00014, 4: 0.00018,             | AZOBR_10300 |                                                             |                                                             |
| AZOLI_0374 | 1: 0.00259, 2: 0.00270, 3: 0.00170, 4: 0.00521, | 1: 0.00210, 2: 0.00371, 3: 0.00222, 4: 0.00284, | AZOBR_10304 |                                                             | 2: 0.00019,                                                 |
| AZOLI_0376 | 4: 0.00015,                                     |                                                 | AZOBR_10306 | 1: 0.00134, 2: 0.00094, 3: 0.00075,                         | 1: 0.00054, 2: 0.00054,                                     |

|            |                                                 |                                                 |             |                                                             |                                                             |
|------------|-------------------------------------------------|-------------------------------------------------|-------------|-------------------------------------------------------------|-------------------------------------------------------------|
|            |                                                 |                                                 |             | 4: 0.00109, 5: 0.00094,                                     | 3: 0.00088,                                                 |
| AZOLI_0378 | 1: 0.00008, 2: 0.00012, 4: 0.00010,             |                                                 | AZOBR_10308 | 1: 0.00571, 2: 0.00418, 3: 0.00583, 4: 0.00595, 5: 0.00652, | 1: 0.00272, 2: 0.00404, 3: 0.00405,                         |
| AZOLI_0379 | 1: 0.00015, 2: 0.00015, 3: 0.00042, 4: 0.00021, |                                                 | AZOBR_10309 | 3: 0.00028, 4: 0.00023, 5: 0.00018,                         |                                                             |
| AZOLI_0381 | 1: 0.00026, 2: 0.00034, 3: 0.00043, 4: 0.00042, | 1: 0.00092, 2: 0.00144, 3: 0.00089, 4: 0.00075, | AZOBR_10310 | 2: 0.00013, 3: 0.00032, 4: 0.00021, 5: 0.00010,             | 2: 0.00011, 3: 0.00014,                                     |
| AZOLI_0384 | 1: 0.00006, 2: 0.00010, 4: 0.00014,             |                                                 | AZOBR_10311 | 1: 0.00107, 2: 0.00124, 3: 0.00104, 4: 0.00136, 5: 0.00114, | 1: 0.00088, 2: 0.00079, 3: 0.00108,                         |
| AZOLI_0386 | 1: 0.00054, 2: 0.00052, 3: 0.00043, 4: 0.00046, | 1: 0.00026, 2: 0.00041, 3: 0.00042, 4: 0.00035, | AZOBR_10312 | 2: 0.00016, 3: 0.00016, 4: 0.00033, 5: 0.00029,             | 1: 0.00008, 2: 0.00031, 3: 0.00023,                         |
| AZOLI_0388 | 4: 0.00007,                                     | 3: 0.00004, 4: 0.00002,                         | AZOBR_10313 | 1: 0.00145, 2: 0.00093, 3: 0.00109, 4: 0.00151, 5: 0.00131, | 1: 0.00109, 2: 0.00095, 3: 0.00108,                         |
| AZOLI_0392 | 1: 0.00070, 2: 0.00089, 3: 0.00030, 4: 0.00194, | 1: 0.00143, 2: 0.00086, 3: 0.00158, 4: 0.00127, | AZOBR_10314 | 2: 0.00024, 4: 0.00019, 5: 0.00025,                         | 1: 0.00017, 2: 0.00020, 3: 0.00050,                         |
| AZOLI_0393 | 1: 0.00031,                                     | 1: 0.00053,                                     | AZOBR_10316 |                                                             | 2: 0.00015, 3: 0.00037, 1: 0.00015, 2: 0.00012, 3: 0.00014, |
| AZOLI_0395 | 1: 0.00017, 4: 0.00007,                         | 3: 0.00014, 4: 0.00022,                         | AZOBR_10319 | 2: 0.00010, 3: 0.00010, 4: 0.00027,                         | 1: 0.00105, 2: 0.00117, 3: 0.00118,                         |
| AZOLI_0397 |                                                 | 4: 0.00018,                                     | AZOBR_10320 | 1: 0.00366, 2: 0.00221, 3: 0.00229, 4: 0.00162, 5: 0.00185, |                                                             |
| AZOLI_0400 | 4: 0.00007,                                     |                                                 | AZOBR_10322 | 1: 0.00296, 2: 0.00301, 3: 0.00305, 4: 0.00327, 5: 0.00371, | 3: 0.00011,                                                 |
| AZOLI_0410 | 1: 0.00009, 4: 0.00015,                         | 1: 0.00022, 3: 0.00033,                         | AZOBR_10324 |                                                             | 3: 0.00006,                                                 |
| AZOLI_0412 | 1: 0.00052, 2: 0.00040, 3: 0.00083, 4: 0.00042, | 1: 0.00110, 2: 0.00131, 3: 0.00102, 4: 0.00105, | AZOBR_10326 | 2: 0.00010, 3: 0.00010, 4: 0.00011, 5: 0.00014,             | 1: 0.00018, 2: 0.00009, 3: 0.00024,                         |
| AZOLI_0416 | 1: 0.00032, 2: 0.00049, 4: 0.00040,             | 1: 0.00055, 2: 0.00055, 3: 0.00055, 4: 0.00028, | AZOBR_10327 | 1: 0.00009, 2: 0.00006, 3: 0.00011, 4: 0.00022, 5: 0.00013, | 1: 0.00014, 2: 0.00011, 3: 0.00006,                         |
| AZOLI_0417 |                                                 | 1: 0.00024, 2: 0.00030, 3: 0.00058, 4: 0.00027, | AZOBR_10330 |                                                             |                                                             |
| AZOLI_0421 | 2: 0.00005,                                     |                                                 | AZOBR_10331 | 1: 0.00074, 2: 0.00084, 3: 0.00090, 4: 0.00051, 5: 0.00116, | 1: 0.00088, 2: 0.00092, 3: 0.00085,                         |
| AZOLI_0436 | 1: 0.00008, 2: 0.00008, 4: 0.00020,             | 1: 0.00012, 2: 0.00007, 3: 0.00028, 4: 0.00010, | AZOBR_10333 |                                                             |                                                             |
| AZOLI_0439 | 1: 0.00928, 2: 0.01041, 3: 0.00545, 4: 0.00653, | 1: 0.00464, 2: 0.00597, 3: 0.00404, 4: 0.00449, | AZOBR_10335 |                                                             |                                                             |
| AZOLI_0439 | 1: 0.00991, 2: 0.01113, 3: 0.00632, 4: 0.00707, | 1: 0.00490, 2: 0.00630, 3: 0.00426, 4: 0.00474, | AZOBR_10337 | 3: 0.00007, 4: 0.00006,                                     | 1: 0.00005, 3: 0.00010,                                     |
| AZOLI_0443 | 1: 0.00521, 2: 0.00649, 3: 0.00425, 4: 0.00244, | 1: 0.00261, 2: 0.00326, 3: 0.00310, 4: 0.00217, | AZOBR_10338 | 2: 0.00028, 3: 0.00027, 4: 0.00027, 5: 0.00027,             | 1: 0.00035, 3: 0.00020,                                     |
| AZOLI_0445 | 1: 0.00456, 2: 0.01078, 3: 0.00664, 4: 0.00623, | 1: 0.00494, 2: 0.00437, 3: 0.00548, 4: 0.00604, | AZOBR_10341 |                                                             | 1: 0.00026, 2: 0.00041, 3: 0.00050,                         |
| AZOLI_0446 | 1: 0.01083, 2: 0.01041, 3: 0.00861, 4: 0.00761, | 1: 0.00644, 2: 0.00447, 3: 0.00476, 4: 0.00524, | AZOBR_10344 | 1: 0.00214, 2: 0.00093, 3: 0.00101, 4: 0.00169, 5: 0.00081, | 1: 0.00073, 2: 0.00099, 3: 0.00035,                         |
| AZOLI_0448 | 1: 0.01138, 2: 0.00952, 3: 0.00934, 4: 0.00874, | 1: 0.00732, 2: 0.00698, 3: 0.00607, 4: 0.00775, | AZOBR_10346 | 1: 0.00016, 2: 0.00038, 3: 0.00041, 4: 0.00026, 5: 0.00033, | 2: 0.00027, 3: 0.00013,                                     |
| AZOLI_0449 | 1: 0.01918, 2: 0.01361, 3: 0.02409, 4: 0.01717, | 1: 0.01634, 2: 0.01246, 3: 0.01836, 4: 0.01525, | AZOBR_10347 |                                                             |                                                             |
| AZOLI_0450 | 1: 0.00067, 2: 0.00056, 3: 0.00055, 4: 0.00085, | 1: 0.00117, 2: 0.00095, 3: 0.00127, 4: 0.00095, | AZOBR_10350 | 1: 0.00011, 4: 0.00023,                                     | 1: 0.00025, 3: 0.00031,                                     |
| AZOLI_0451 | 1: 0.00037, 2: 0.00072, 3: 0.00050, 4: 0.00068, | 1: 0.00063, 2: 0.00073, 3: 0.00070, 4: 0.00066, | AZOBR_10351 | 2: 0.00016, 3: 0.00019, 5: 0.00018,                         | 1: 0.00045, 2: 0.00071, 3: 0.00058,                         |
| AZOLI_0455 | 1: 0.00736, 2: 0.00919, 3: 0.00596, 4: 0.00428, | 1: 0.00382, 2: 0.00251, 3: 0.00306, 4: 0.00334, | AZOBR_10356 | 1: 0.00040, 2: 0.00041, 3: 0.00034, 4: 0.00082, 5: 0.00089, | 1: 0.00073, 2: 0.00029, 3: 0.00039,                         |
| AZOLI_0456 | 1: 0.00660, 2: 0.00586, 3: 0.00562, 4: 0.00556, | 1: 0.00353, 2: 0.00389, 3: 0.00234, 4: 0.00432, | AZOBR_10357 | 2: 0.00010, 3: 0.00019, 4: 0.00019,                         | 1: 0.00014, 3: 0.00010,                                     |
| AZOLI_0457 | 1: 0.00005, 4: 0.00011,                         | 1: 0.00012, 2: 0.00010, 3: 0.00012, 4: 0.00014, | AZOBR_10358 | 1: 0.00006, 3: 0.00005, 4: 0.00010,                         |                                                             |
| AZOLI_0460 | 1: 0.00266, 2: 0.00235, 3: 0.00484, 4: 0.00287, | 1: 0.00202, 2: 0.00097, 3: 0.00214, 4: 0.00249, | AZOBR_10359 |                                                             | 3: 0.00008,                                                 |
| AZOLI_0461 | 1: 0.01297, 2: 0.01147, 3: 0.00659, 4: 0.00622, | 1: 0.00579, 2: 0.00738, 3: 0.00612, 4: 0.00661, | AZOBR_10363 | 4: 0.00004,                                                 | 1: 0.00004, 3: 0.00005,                                     |
| AZOLI_0462 | 1: 0.01234, 2: 0.00847, 3: 0.01014, 4: 0.00924, | 1: 0.00626, 2: 0.00592, 3: 0.00622, 4: 0.00589, | AZOBR_10366 | 1: 0.00059, 2: 0.00060, 3: 0.00072, 4: 0.00052, 5: 0.00063, | 1: 0.00017, 2: 0.00021, 3: 0.00020,                         |
| AZOLI_0463 | 1: 0.01239, 2: 0.01196, 3: 0.00319, 4: 0.00390, | 1: 0.00350, 2: 0.00452, 3: 0.00197, 4: 0.00447, | AZOBR_10367 | 1: 0.00016, 3: 0.00027, 4: 0.00038, 5: 0.00022,             |                                                             |
| AZOLI_0464 | 1: 0.00539, 2: 0.00502, 3: 0.00660, 4: 0.00450, | 1: 0.00254, 2: 0.00241, 3: 0.00225, 4: 0.00259, | AZOBR_10368 |                                                             |                                                             |
| AZOLI_0465 | 1: 0.01266, 2: 0.01092, 3: 0.00762, 4: 0.00647, | 1: 0.01023, 2: 0.01165, 3: 0.00990, 4: 0.00882, | AZOBR_10369 | 4: 0.00024, 5: 0.00024,                                     | 1: 0.00018, 2: 0.00010, 3: 0.00009,                         |
| AZOLI_0466 | 1: 0.00915, 2: 0.00680, 3: 0.00584, 4: 0.00789, | 1: 0.00701, 2: 0.00658, 3: 0.00602, 4: 0.00552, | AZOBR_10370 | 1: 0.00061, 2: 0.00078, 3: 0.00116, 4: 0.00042, 5: 0.00033, | 1: 0.00035, 2: 0.00025, 3: 0.00017,                         |
| AZOLI_0467 | 1: 0.00273, 2: 0.00449, 3: 0.00397, 4: 0.00266, | 1: 0.00230, 2: 0.00204, 3: 0.00219, 4: 0.00283, | AZOBR_10371 | 1: 0.00024, 2: 0.00050, 3: 0.00041, 4: 0.00011,             | 3: 0.00035,                                                 |
| AZOLI_0468 | 1: 0.00253, 2: 0.00319, 3: 0.00223, 4: 0.00314, | 1: 0.00217, 2: 0.00286, 3: 0.00170, 4: 0.00342, | AZOBR_10372 | 1: 0.00012, 2: 0.00031, 4: 0.00040, 5: 0.00024,             | 1: 0.00030, 2: 0.00017, 3: 0.00033,                         |
| AZOLI_0469 | 1: 0.00383, 2: 0.00285, 3: 0.00445, 4: 0.00717, | 1: 0.00489, 2: 0.00406, 3: 0.00321, 4: 0.00604, | AZOBR_10373 | 1: 0.00055, 2: 0.00082, 3: 0.00065, 4: 0.00041, 5: 0.00034, | 1: 0.00025, 2: 0.00060, 3: 0.00048,                         |
| AZOLI_0470 | 1: 0.00835, 2: 0.00992, 3: 0.00398, 4: 0.00673, | 1: 0.00423, 2: 0.00644, 3: 0.00260, 4: 0.00221, | AZOBR_10374 | 1: 0.00103, 3: 0.00142, 4: 0.00044, 5: 0.00053,             | 1: 0.00033, 2: 0.00103,                                     |
| AZOLI_0471 | 1: 0.00454, 2: 0.00365, 3: 0.00366, 4: 0.00392, | 1: 0.00179, 2: 0.00154, 3: 0.00100, 4: 0.00144, | AZOBR_10375 | 1: 0.00214, 2: 0.00242, 3: 0.00203, 4: 0.00147, 5: 0.00205, | 1: 0.00030, 2: 0.00130, 3: 0.00044,                         |
| AZOLI_0472 | 1: 0.00840, 2: 0.01142, 3: 0.01123, 4: 0.00938, | 1: 0.00710, 2: 0.00684, 3: 0.00694, 4: 0.00596, | AZOBR_10377 |                                                             |                                                             |
| AZOLI_0473 | 1: 0.01872, 2: 0.01465, 3: 0.00558, 4: 0.01414, | 1: 0.00784, 2: 0.00516, 3: 0.00735, 4: 0.00538, | AZOBR_10378 |                                                             |                                                             |
| AZOLI_0474 | 1: 0.00358, 2: 0.00396, 3: 0.00268, 4: 0.00512, | 1: 0.00273, 2: 0.00219, 3: 0.00289, 4: 0.00310, | AZOBR_10380 | 1: 0.00014,                                                 |                                                             |
| AZOLI_0475 | 1: 0.00322, 2: 0.00430, 3: 0.00527, 4: 0.00668, | 1: 0.00229, 2: 0.00297, 3: 0.00262, 4: 0.00383, | AZOBR_10381 | 1: 0.00026, 2: 0.00047, 3: 0.00030, 4: 0.00018, 5: 0.00103, | 1: 0.00028, 2: 0.00038, 3: 0.00066,                         |
| AZOLI_0476 | 1: 0.00780, 2: 0.00652,                         | 1: 0.00382, 2: 0.00356,                         | AZOBR_10382 | 1: 0.00083, 2: 0.00074, 3: 0.00059,                         | 1: 0.00024, 2: 0.00030,                                     |

|            |                                                    |                                                    |             |                                                                |                                        |
|------------|----------------------------------------------------|----------------------------------------------------|-------------|----------------------------------------------------------------|----------------------------------------|
|            | 3: 0.00846, 4: 0.00777,                            | 3: 0.00370, 4: 0.00353,                            |             | 4: 0.00079, 5: 0.00050,                                        | 3: 0.00063,                            |
| AZOLI_0477 | 1: 0.00537, 2: 0.00866,<br>3: 0.00571, 4: 0.00927, | 1: 0.00650, 2: 0.00718,<br>3: 0.00880, 4: 0.00725, | AZOBR_10384 |                                                                | 3: 0.00002,                            |
| AZOLI_0478 | 1: 0.00766, 2: 0.00326,<br>3: 0.00607, 4: 0.00495, | 1: 0.00297, 2: 0.00456,<br>3: 0.00263, 4: 0.00424, | AZOBR_10388 | 1: 0.00029, 3: 0.00021, 4: 0.00009,<br>5: 0.00011,             | 3: 0.00008,                            |
| AZOLI_0479 | 1: 0.00503, 2: 0.00707,<br>3: 0.00733, 4: 0.00635, | 1: 0.00437, 2: 0.00526,<br>3: 0.00424, 4: 0.00558, | AZOBR_10390 | 1: 0.00015, 3: 0.00013, 4: 0.00007,                            | 2: 0.00015,                            |
| AZOLI_0480 | 1: 0.00414, 2: 0.00426,<br>3: 0.00366, 4: 0.00509, | 1: 0.00420, 2: 0.00295,<br>3: 0.00505, 4: 0.00401, | AZOBR_10391 | 4: 0.00015, 5: 0.00010,                                        |                                        |
| AZOLI_0482 | 1: 0.00200, 2: 0.00175,<br>3: 0.00400, 4: 0.00200, | 1: 0.00267, 2: 0.00313,<br>3: 0.00373, 4: 0.00418, | AZOBR_10392 | 1: 0.00047, 2: 0.00023, 3: 0.00031,<br>4: 0.00018, 5: 0.00018, | 1: 0.00010, 2: 0.00030,<br>3: 0.00013, |
| AZOLI_0483 | 1: 0.00009, 2: 0.00031,<br>4: 0.00030,             | 1: 0.00022, 2: 0.00021,<br>3: 0.00019, 4: 0.00030, | AZOBR_10393 | 2: 0.00012,                                                    |                                        |
| AZOLI_0486 | 1: 0.00008,                                        |                                                    | AZOBR_10395 | 2: 0.00020, 3: 0.00023, 4: 0.00009,<br>5: 0.00015,             | 1: 0.00014, 2: 0.00016,<br>3: 0.00014, |
| AZOLI_0488 |                                                    | 1: 0.00008, 2: 0.00005,<br>4: 0.00009,             | AZOBR_10396 |                                                                | 2: 0.00037, 3: 0.00016,                |
| AZOLI_0489 | 1: 0.00008,                                        | 1: 0.00021,                                        | AZOBR_10397 |                                                                |                                        |
| AZOLI_0490 | 4: 0.00005,                                        |                                                    | AZOBR_10398 |                                                                | 1: 0.00067, 2: 0.00076,<br>3: 0.00087, |
| AZOLI_0507 |                                                    | 2: 0.00007, 4: 0.00012,                            | AZOBR_10399 | 4: 0.00017,                                                    | 1: 0.00016, 3: 0.00038,                |
| AZOLI_0508 | 1: 0.00030, 2: 0.00038,<br>4: 0.00020,             | 2: 0.00030,                                        | AZOBR_10400 |                                                                |                                        |
| AZOLI_0516 | 3: 0.00301, 4: 0.00018,                            | 1: 0.00487, 2: 0.00417,<br>3: 0.00515, 4: 0.00516, | AZOBR_10401 |                                                                | 2: 0.00003,                            |
| AZOLI_0517 |                                                    | 4: 0.00011,                                        | AZOBR_10402 | 1: 0.00021, 3: 0.00018, 4: 0.00015,                            | 1: 0.00018, 2: 0.00021,                |
| AZOLI_0519 | 1: 0.00018, 2: 0.00022,<br>4: 0.00023,             | 1: 0.00036, 2: 0.00039,<br>3: 0.00033, 4: 0.00023, | AZOBR_10403 | 1: 0.00022, 3: 0.00014,                                        |                                        |
| AZOLI_0520 | 1: 0.00170, 2: 0.00157,<br>3: 0.00498, 4: 0.00244, | 1: 0.00272, 2: 0.00387,<br>3: 0.00258, 4: 0.00183, | AZOBR_10404 | 1: 0.00019, 2: 0.00042, 3: 0.00033,<br>4: 0.00056, 5: 0.00043, | 2: 0.00031, 3: 0.00027,                |
| AZOLI_0534 | 1: 0.00009, 2: 0.00012,<br>4: 0.00004,             | 1: 0.00015, 2: 0.00009,<br>3: 0.00008, 4: 0.00009, | AZOBR_10406 |                                                                |                                        |
| AZOLI_0535 |                                                    | 1: 0.00280, 2: 0.00219,<br>3: 0.00373, 4: 0.00338, | AZOBR_10408 | 1: 0.00010, 3: 0.00010, 4: 0.00005,<br>5: 0.00005,             | 1: 0.00012, 2: 0.00006,<br>3: 0.00013, |
| AZOLI_0536 |                                                    | 1: 0.00125, 2: 0.00188,<br>3: 0.00169, 4: 0.00131, | AZOBR_10409 | 4: 0.00011,                                                    | 2: 0.00012,                            |
| AZOLI_0537 |                                                    | 1: 0.00225, 2: 0.00207,<br>3: 0.00179, 4: 0.00190, | AZOBR_10410 | 3: 0.00006, 4: 0.00010, 5: 0.00005,                            |                                        |
| AZOLI_0538 |                                                    | 1: 0.00237, 2: 0.00171,<br>3: 0.00188, 4: 0.00131, | AZOBR_10413 |                                                                |                                        |
| AZOLI_0540 | 1: 0.00023, 3: 0.00032,<br>4: 0.00039,             | 1: 0.00103, 2: 0.00088,<br>3: 0.00134, 4: 0.00088, | AZOBR_10414 | 1: 0.00039, 2: 0.00028, 3: 0.00033,<br>4: 0.00086, 5: 0.00075, | 1: 0.00060, 2: 0.00051,<br>3: 0.00087, |
| AZOLI_0541 |                                                    | 1: 0.00062, 2: 0.00060,<br>3: 0.00055, 4: 0.00079, | AZOBR_10415 | 3: 0.00026, 4: 0.00017, 5: 0.00009,                            | 1: 0.00044, 2: 0.00022,<br>3: 0.00038, |
| AZOLI_0542 |                                                    | 2: 0.00020,                                        | AZOBR_10418 | 4: 0.00010, 5: 0.00010,                                        |                                        |
| AZOLI_0544 |                                                    | 1: 0.00106, 2: 0.00138,<br>3: 0.00194, 4: 0.00178, | AZOBR_10423 | 3: 0.00015,                                                    |                                        |
| AZOLI_0545 |                                                    | 1: 0.00168, 2: 0.00245,<br>3: 0.00309, 4: 0.00242, | AZOBR_10425 |                                                                |                                        |
| AZOLI_0546 |                                                    | 2: 0.00025,                                        | AZOBR_10430 |                                                                |                                        |
| AZOLI_0548 |                                                    | 1: 0.00020, 2: 0.00019,<br>3: 0.00043,             | AZOBR_10432 |                                                                | 1: 0.00010,                            |
| AZOLI_0549 | 1: 0.00015, 4: 0.00013,                            | 3: 0.00006, 4: 0.00016,                            | AZOBR_10434 |                                                                |                                        |
| AZOLI_0552 | 1: 0.00112, 2: 0.00103,<br>3: 0.00144, 4: 0.00123, | 1: 0.00196, 2: 0.00179,<br>3: 0.00186, 4: 0.00203, | AZOBR_10436 |                                                                |                                        |
| AZOLI_0553 | 1: 0.00129, 2: 0.00159,<br>3: 0.00061, 4: 0.00284, | 1: 0.00174, 2: 0.00336,<br>3: 0.00246, 4: 0.00272, | AZOBR_10439 |                                                                |                                        |
| AZOLI_0554 | 1: 0.00008, 2: 0.00016,<br>3: 0.00052, 4: 0.00023, | 1: 0.00005, 2: 0.00018,<br>3: 0.00006, 4: 0.00016, | AZOBR_10440 |                                                                |                                        |
| AZOLI_0557 | 1: 0.00004,                                        | 2: 0.00004, 4: 0.00004,                            | AZOBR_10441 | 3: 0.00009,                                                    |                                        |
| AZOLI_0558 | 1: 0.00013, 2: 0.00008,<br>4: 0.00011,             | 3: 0.00005, 4: 0.00004,                            | AZOBR_10442 | 1: 0.00032, 2: 0.00040, 3: 0.00049,<br>4: 0.00053, 5: 0.00026, | 1: 0.00016, 2: 0.00033,<br>3: 0.00020, |
| AZOLI_0565 | 2: 0.00007, 4: 0.00006,                            | 1: 0.00033, 2: 0.00007,<br>3: 0.00016, 4: 0.00013, | AZOBR_10444 | 1: 0.00062, 2: 0.00141, 3: 0.00106,<br>4: 0.00134, 5: 0.00085, | 1: 0.00130, 2: 0.00090,<br>3: 0.00083, |
| AZOLI_0566 |                                                    | 3: 0.00010,                                        | AZOBR_10445 | 2: 0.00010,                                                    | 1: 0.00015, 3: 0.00007,                |
| AZOLI_0568 | 1: 0.00048, 2: 0.00049,<br>4: 0.00073,             | 1: 0.00067, 2: 0.00035,<br>3: 0.00065, 4: 0.00042, | AZOBR_10448 |                                                                |                                        |
| AZOLI_0572 |                                                    | 4: 0.00004,                                        | AZOBR_10453 |                                                                |                                        |
| AZOLI_0574 | 3: 0.00079, 4: 0.00039,                            | 2: 0.00066, 4: 0.00048,                            | AZOBR_10454 |                                                                | 2: 0.00025,                            |
| AZOLI_0577 |                                                    | 2: 0.00008,                                        | AZOBR_10455 | 4: 0.00044, 5: 0.00044,                                        | 3: 0.00017,                            |
| AZOLI_0578 | 1: 0.00019, 2: 0.00038,<br>3: 0.00016, 4: 0.00035, | 1: 0.00053, 2: 0.00042,<br>3: 0.00050, 4: 0.00029, | AZOBR_10458 | 1: 0.00022, 2: 0.00008, 3: 0.00011,<br>4: 0.00033, 5: 0.00021, | 1: 0.00017, 2: 0.00016,<br>3: 0.00022, |
| AZOLI_0586 | 1: 0.00022, 2: 0.00022,<br>4: 0.00031,             | 1: 0.00095, 2: 0.00099,<br>3: 0.00070, 4: 0.00149, | AZOBR_10461 | 1: 0.00186, 2: 0.00159, 3: 0.00178,<br>4: 0.00180, 5: 0.00184, | 1: 0.00149, 2: 0.00207,<br>3: 0.00198, |
| AZOLI_0588 | 1: 0.00293, 2: 0.00202,<br>3: 0.00853, 4: 0.00384, | 1: 0.00371, 2: 0.00448,<br>3: 0.00557, 4: 0.00995, | AZOBR_10466 | 3: 0.00003,                                                    | 3: 0.00002,                            |
| AZOLI_0589 | 1: 0.00027, 2: 0.00009,<br>4: 0.00012,             |                                                    | AZOBR_10469 |                                                                |                                        |
| AZOLI_0592 |                                                    | 4: 0.00012,                                        | AZOBR_10471 | 5: 0.00018,                                                    | 2: 0.00012, 3: 0.00011,                |
| AZOLI_0595 |                                                    | 3: 0.00005, 4: 0.00004,                            | AZOBR_10473 | 1: 0.00011, 3: 0.00022, 4: 0.00015,<br>5: 0.00022,             | 2: 0.00013, 3: 0.00009,                |
| AZOLI_0598 | 1: 0.00009, 2: 0.00033,<br>3: 0.00049, 4: 0.00024, | 2: 0.00032, 3: 0.00020,<br>4: 0.00026,             | AZOBR_10474 | 4: 0.00012, 5: 0.00018,                                        | 3: 0.00016,                            |
| AZOLI_0599 | 4: 0.00012,                                        | 4: 0.00005,                                        | AZOBR_10475 |                                                                | 1: 0.00005, 2: 0.00008,<br>3: 0.00009, |
| AZOLI_0602 | 1: 0.00010, 2: 0.00016,<br>4: 0.00014,             | 1: 0.00006, 2: 0.00006,<br>3: 0.00015, 4: 0.00016, | AZOBR_10476 | 1: 0.00016,                                                    | 1: 0.00017, 3: 0.00010,                |
| AZOLI_0605 | 1: 0.00010, 4: 0.00019,                            | 4: 0.00004,                                        | AZOBR_10479 | 1: 0.00014, 3: 0.00016, 4: 0.00025,<br>5: 0.00009,             | 1: 0.00009, 2: 0.00027,<br>3: 0.00020, |
| AZOLI_0606 | 2: 0.00005, 4: 0.00013,                            |                                                    | AZOBR_10483 |                                                                | 1: 0.00015, 3: 0.00003,                |

|            |                                                    |                                                    |             |                                                                |                                        |
|------------|----------------------------------------------------|----------------------------------------------------|-------------|----------------------------------------------------------------|----------------------------------------|
| AZOLI_0607 | 2: 0.00017, 4: 0.00010,                            |                                                    | AZOBR_10485 | 4: 0.00025, 5: 0.00015,                                        | 2: 0.00011, 3: 0.00009,                |
| AZOLI_0609 | 2: 0.00002, 4: 0.00004,                            | 1: 0.00010, 2: 0.00007,<br>3: 0.00008, 4: 0.00003, | AZOBR_10486 | 1: 0.00067, 2: 0.00107, 3: 0.00047,<br>4: 0.00054, 5: 0.00042, | 1: 0.00051, 2: 0.00031,<br>3: 0.00034, |
| AZOLI_0615 | 1: 0.00025, 2: 0.00015,<br>4: 0.00009,             | 2: 0.00010,                                        | AZOBR_10487 |                                                                |                                        |
| AZOLI_0616 |                                                    | 1: 0.00021, 2: 0.00020,<br>3: 0.00015, 4: 0.00053, | AZOBR_10488 | 1: 0.00091, 2: 0.00192, 3: 0.00137,<br>4: 0.00135, 5: 0.00242, | 1: 0.00148, 2: 0.00102,<br>3: 0.00187, |
| AZOLI_0617 | 1: 0.00006, 4: 0.00007,                            | 2: 0.00004, 3: 0.00006,<br>4: 0.00005,             | AZOBR_10489 | 1: 0.00048, 2: 0.00032, 3: 0.00041,<br>4: 0.00050, 5: 0.00074, | 2: 0.00035, 3: 0.00037,                |
| AZOLI_0618 |                                                    | 1: 0.00004,                                        | AZOBR_10491 | 1: 0.00017, 4: 0.00041, 5: 0.00035,                            | 3: 0.00016,                            |
| AZOLI_0619 | 1: 0.00018, 2: 0.00037,<br>3: 0.00077, 4: 0.00035, | 1: 0.00076, 2: 0.00062,<br>3: 0.00124, 4: 0.00106, | AZOBR_10493 | 1: 0.00166, 2: 0.00197, 3: 0.00128,<br>4: 0.00206, 5: 0.00185, | 1: 0.00105, 2: 0.00081,<br>3: 0.00119, |
| AZOLI_0620 | 1: 0.00241, 2: 0.00228,<br>3: 0.00298, 4: 0.00189, | 1: 0.00215, 2: 0.00235,<br>3: 0.00188, 4: 0.00145, | AZOBR_10494 | 1: 0.00042, 2: 0.00024, 3: 0.00055,<br>4: 0.00066, 5: 0.00029, | 2: 0.00008, 3: 0.00021,                |
| AZOLI_0622 | 4: 0.00013,                                        | 1: 0.00071, 2: 0.00054,<br>3: 0.00066, 4: 0.00050, | AZOBR_10496 |                                                                |                                        |
| AZOLI_0624 | 2: 0.00005, 4: 0.00003,                            | 1: 0.00012, 3: 0.00011,<br>4: 0.00006,             | AZOBR_10497 | 1: 0.00018, 3: 0.00025, 4: 0.00012,<br>5: 0.00012,             | 1: 0.00008, 3: 0.00018,                |
| AZOLI_0626 | 1: 0.00067, 2: 0.00056,<br>3: 0.00067, 4: 0.00048, | 1: 0.00133, 2: 0.00124,<br>3: 0.00094, 4: 0.00137, | AZOBR_10498 |                                                                | 1: 0.00022, 3: 0.00033,                |
| AZOLI_0629 | 1: 0.00067, 4: 0.00053,                            | 1: 0.00026, 2: 0.00050,<br>3: 0.00055, 4: 0.00018, | AZOBR_10499 |                                                                |                                        |
| AZOLI_0634 | 1: 0.00013, 2: 0.00009,<br>4: 0.00005,             | 1: 0.00023, 2: 0.00025,<br>3: 0.00034, 4: 0.00018, | AZOBR_10500 | 1: 0.00021, 2: 0.00070, 3: 0.00036,<br>4: 0.00043, 5: 0.00061, | 1: 0.00021, 2: 0.00015,<br>3: 0.00023, |
| AZOLI_0635 | 2: 0.00020, 4: 0.00017,                            | 1: 0.00031, 2: 0.00035,<br>3: 0.00027, 4: 0.00026, | AZOBR_10501 |                                                                |                                        |
| AZOLI_0638 |                                                    | 1: 0.00015, 3: 0.00016,<br>4: 0.00026,             | AZOBR_10502 | 4: 0.00005,                                                    |                                        |
| AZOLI_0641 | 1: 0.00085, 2: 0.00136,<br>3: 0.00070, 4: 0.00110, | 1: 0.00130, 2: 0.00056,<br>3: 0.00084, 4: 0.00068, | AZOBR_10503 | 1: 0.00065, 2: 0.00092, 3: 0.00099,<br>4: 0.00116, 5: 0.00063, | 1: 0.00864, 2: 0.01076,<br>3: 0.00765, |
| AZOLI_0642 | 1: 0.00141, 2: 0.00106,<br>3: 0.00538, 4: 0.00185, | 1: 0.00202, 2: 0.00143,<br>3: 0.00230, 4: 0.00199, | AZOBR_10504 |                                                                |                                        |
| AZOLI_0647 |                                                    | 2: 0.00016,                                        | AZOBR_10505 | 1: 0.00003,                                                    | 2: 0.00003, 3: 0.00003,                |
| AZOLI_0653 | 1: 0.00033, 2: 0.00034,<br>3: 0.00035, 4: 0.00032, | 1: 0.00025, 2: 0.00037,<br>3: 0.00018, 4: 0.00018, | AZOBR_10506 |                                                                | 3: 0.00008,                            |
| AZOLI_0654 | 1: 0.00085, 2: 0.00038,<br>3: 0.00053, 4: 0.00163, | 1: 0.00134, 2: 0.00147,<br>3: 0.00121, 4: 0.00130, | AZOBR_10509 | 1: 0.00018, 4: 0.00020,                                        |                                        |
| AZOLI_0655 |                                                    | 2: 0.00005,                                        | AZOBR_10510 | 1: 0.00023, 2: 0.00005, 3: 0.00022,<br>4: 0.00014, 5: 0.00014, | 1: 0.00030, 2: 0.00032,<br>3: 0.00036, |
| AZOLI_0657 |                                                    | 4: 0.00007,                                        | AZOBR_10514 | 1: 0.00026, 2: 0.00070, 3: 0.00097,<br>4: 0.00042, 5: 0.00036, | 1: 0.00034, 2: 0.00025,<br>3: 0.00011, |
| AZOLI_0658 |                                                    | 4: 0.00009,                                        | AZOBR_10520 |                                                                |                                        |
| AZOLI_0659 |                                                    | 4: 0.00006,                                        | AZOBR_10523 | 1: 0.00025, 2: 0.00036, 3: 0.00035,<br>4: 0.00040, 5: 0.00028, | 1: 0.00189, 2: 0.00275,<br>3: 0.00133, |
| AZOLI_0660 | 1: 0.00033, 2: 0.00076,<br>3: 0.00035, 4: 0.00050, | 1: 0.00042, 2: 0.00032,<br>3: 0.00027, 4: 0.00014, | AZOBR_10524 |                                                                | 1: 0.00027, 2: 0.00008,<br>3: 0.00023, |
| AZOLI_0661 | 4: 0.00019,                                        | 4: 0.00010,                                        | AZOBR_10525 | 5: 0.00005,                                                    | 1: 0.00018, 2: 0.00020,<br>3: 0.00019, |
| AZOLI_0665 |                                                    | 2: 0.00043, 3: 0.00038,<br>4: 0.00015,             | AZOBR_10527 |                                                                |                                        |
| AZOLI_0666 | 1: 0.00009, 4: 0.00015,                            |                                                    | AZOBR_10528 | 1: 0.00691, 2: 0.00302, 3: 0.00529,<br>4: 0.00299, 5: 0.00252, | 1: 0.00070, 2: 0.00102,<br>3: 0.00111, |
| AZOLI_0667 | 4: 0.00006,                                        |                                                    | AZOBR_10531 | 1: 0.00010, 2: 0.00006, 3: 0.00006,<br>4: 0.00012, 5: 0.00009, | 1: 0.00009, 2: 0.00007,<br>3: 0.00006, |
| AZOLI_0669 |                                                    | 2: 0.00034, 3: 0.00050,<br>4: 0.00060,             | AZOBR_10534 | 4: 0.00019, 5: 0.00023,                                        |                                        |
| AZOLI_0670 |                                                    | 1: 0.00139, 3: 0.00092,<br>4: 0.00133,             | AZOBR_10535 |                                                                |                                        |
| AZOLI_0671 |                                                    | 1: 0.00053, 2: 0.00117,<br>3: 0.00137, 4: 0.00246, | AZOBR_10536 |                                                                | 2: 0.00013, 3: 0.00008,                |
| AZOLI_0672 |                                                    | 1: 0.00191, 2: 0.00293,<br>3: 0.00120, 4: 0.00067, | AZOBR_10537 |                                                                |                                        |
| AZOLI_0673 |                                                    | 1: 0.00007, 2: 0.00007,<br>4: 0.00006,             | AZOBR_10538 |                                                                |                                        |
| AZOLI_0677 | 4: 0.00003,                                        |                                                    | AZOBR_20005 |                                                                |                                        |
| AZOLI_0679 |                                                    | 1: 0.00243, 2: 0.00213,<br>3: 0.00243, 4: 0.00228, | AZOBR_20009 |                                                                |                                        |
| AZOLI_0680 |                                                    | 1: 0.00125, 2: 0.00134,<br>3: 0.00127, 4: 0.00122, | AZOBR_20011 |                                                                |                                        |
| AZOLI_0681 |                                                    | 1: 0.00720, 2: 0.00715,<br>3: 0.00619, 4: 0.00587, | AZOBR_20012 |                                                                | 1: 0.00103, 2: 0.00045,<br>3: 0.00055, |
| AZOLI_0685 |                                                    | 4: 0.00009,                                        | AZOBR_20015 | 1: 0.00968, 2: 0.00935, 3: 0.00644,<br>4: 0.01333, 5: 0.01272, | 1: 0.01133, 2: 0.00683,<br>3: 0.00771, |
| AZOLI_0686 |                                                    | 1: 0.00024, 2: 0.00031,<br>3: 0.00051,             | AZOBR_20016 | 1: 0.01441, 2: 0.01416, 3: 0.01184,<br>4: 0.01314, 5: 0.01523, | 1: 0.00955, 2: 0.00970,<br>3: 0.00910, |
| AZOLI_0690 | 1: 0.00014, 2: 0.00022,<br>3: 0.00031, 4: 0.00021, | 1: 0.00022, 2: 0.00005,<br>3: 0.00015, 4: 0.00017, | AZOBR_20017 |                                                                |                                        |
| AZOLI_0694 | 2: 0.00012, 4: 0.00031,                            | 2: 0.00008, 3: 0.00013,<br>4: 0.00014,             | AZOBR_20019 | 1: 0.00091, 2: 0.00073, 3: 0.00056,<br>4: 0.00090, 5: 0.00066, | 1: 0.00484, 2: 0.00535,<br>3: 0.00370, |
| AZOLI_0698 | 1: 0.00228, 2: 0.00247,<br>3: 0.00204, 4: 0.00216, | 1: 0.00040, 2: 0.00093,<br>3: 0.00084, 4: 0.00067, | AZOBR_20020 |                                                                |                                        |
| AZOLI_0699 | 1: 0.00058, 2: 0.00068,<br>3: 0.00039, 4: 0.00066, | 1: 0.00080, 2: 0.00048,<br>3: 0.00062, 4: 0.00068, | AZOBR_20022 |                                                                |                                        |
| AZOLI_0704 | 4: 0.00017,                                        | 1: 0.00016, 2: 0.00023,<br>3: 0.00050, 4: 0.00017, | AZOBR_20027 | 2: 0.00029, 3: 0.00028, 4: 0.00040,<br>5: 0.00058,             | 3: 0.00036,                            |
| AZOLI_0707 | 1: 0.00015, 2: 0.00018,                            | 1: 0.00015, 2: 0.00020,<br>3: 0.00006,             | AZOBR_20032 | 3: 0.00016, 4: 0.00019, 5: 0.00019,                            | 2: 0.00027, 3: 0.00029,                |
| AZOLI_0715 |                                                    | 3: 0.00007,                                        | AZOBR_30003 |                                                                | 1: 0.00014, 3: 0.00027,                |
| AZOLI_0730 | 4: 0.00003,                                        | 4: 0.00005,                                        | AZOBR_30005 | 4: 0.00027, 5: 0.00027,                                        | 3: 0.00087,                            |
| AZOLI_0732 |                                                    | 2: 0.00006, 3: 0.00006,                            | AZOBR_30007 | 1: 0.00041, 2: 0.00036, 3: 0.00039,                            | 1: 0.00035, 2: 0.00051,                |

|            |                                                    |                                                    |             |                                                                |                                        |
|------------|----------------------------------------------------|----------------------------------------------------|-------------|----------------------------------------------------------------|----------------------------------------|
|            |                                                    | 4: 0.00010,                                        |             | 4: 0.00049, 5: 0.00041,                                        | 3: 0.00059,                            |
| AZOLI_0733 |                                                    | 1: 0.00013, 2: 0.00034,<br>3: 0.00023, 4: 0.00034, | AZOBR_30012 |                                                                | 1: 0.00010,                            |
| AZOLI_0734 | 3: 0.00009,                                        |                                                    | AZOBR_30018 | 1: 0.00017, 2: 0.00030, 3: 0.00048,<br>4: 0.00035, 5: 0.00035, | 1: 0.00022, 2: 0.00012,<br>3: 0.00024, |
| AZOLI_0735 |                                                    | 4: 0.00006,                                        | AZOBR_30019 | 1: 0.00019, 3: 0.00014, 4: 0.00015,<br>5: 0.00004,             | 1: 0.00005, 3: 0.00005,                |
| AZOLI_0739 | 1: 0.00005, 4: 0.00004,                            | 2: 0.00005, 4: 0.00010,                            | AZOBR_30020 | 1: 0.00025, 2: 0.00017, 3: 0.00043,<br>4: 0.00018, 5: 0.00013, | 1: 0.00016, 2: 0.00037,<br>3: 0.00032, |
| AZOLI_0746 | 1: 0.00094, 2: 0.00097,<br>3: 0.00076, 4: 0.00119, | 1: 0.00119, 2: 0.00099,<br>3: 0.00101, 4: 0.00081, | AZOBR_30021 | 1: 0.00027, 3: 0.00060, 4: 0.00024,<br>5: 0.00012,             | 1: 0.00011, 2: 0.00019,<br>3: 0.00017, |
| AZOLI_0747 |                                                    | 3: 0.00015, 4: 0.00024,                            | AZOBR_30029 | 1: 0.00063, 2: 0.00067, 3: 0.00064,<br>4: 0.00078, 5: 0.00055, | 1: 0.00097, 2: 0.00074,<br>3: 0.00081, |
| AZOLI_0748 |                                                    | 3: 0.00005,                                        | AZOBR_30034 | 1: 0.00095, 2: 0.00084, 3: 0.00099,<br>4: 0.00124, 5: 0.00117, | 3: 0.00059,                            |
| AZOLI_0753 | 2: 0.00013, 4: 0.00007,                            |                                                    | AZOBR_40002 |                                                                | 1: 0.00002, 2: 0.00006,<br>3: 0.00011, |
| AZOLI_0755 |                                                    | 2: 0.00007,                                        | AZOBR_40038 | 1: 0.00039, 2: 0.00068, 3: 0.00051,<br>4: 0.00063, 5: 0.00034, | 1: 0.00014, 2: 0.00015,<br>3: 0.00031, |
| AZOLI_0758 | 2: 0.00003, 3: 0.00009,<br>4: 0.00008,             | 1: 0.00020, 2: 0.00012,<br>3: 0.00023, 4: 0.00016, | AZOBR_40039 | 1: 0.00161, 2: 0.00329, 3: 0.00149,<br>4: 0.00275, 5: 0.00298, | 1: 0.00268, 2: 0.00164,<br>3: 0.00260, |
| AZOLI_0763 | 2: 0.00013, 4: 0.00006,                            | 1: 0.00017, 3: 0.00014,<br>4: 0.00011,             | AZOBR_40040 | 1: 0.00014, 2: 0.00013, 3: 0.00015,<br>4: 0.00015, 5: 0.00014, | 1: 0.00014, 2: 0.00013,<br>3: 0.00017, |
| AZOLI_0764 |                                                    | 4: 0.00005,                                        | AZOBR_40042 | 1: 0.00040, 2: 0.00045, 3: 0.00053,<br>4: 0.00045, 5: 0.00045, |                                        |
| AZOLI_0768 | 4: 0.00014,                                        | 1: 0.00024, 3: 0.00043,<br>4: 0.00028,             | AZOBR_40045 | 2: 0.00041, 3: 0.00020, 4: 0.00043,<br>5: 0.00048,             | 1: 0.00050, 2: 0.00045,<br>3: 0.00068, |
| AZOLI_0769 | 1: 0.00005, 2: 0.00013,<br>3: 0.00087, 4: 0.00013, | 1: 0.00020, 2: 0.00020,<br>3: 0.00020, 4: 0.00028, | AZOBR_40049 | 4: 0.00007, 5: 0.00013,                                        |                                        |
| AZOLI_0770 | 1: 0.00026, 2: 0.00017,<br>3: 0.00132, 4: 0.00015, | 1: 0.00013, 3: 0.00023,<br>4: 0.00007,             | AZOBR_40052 | 2: 0.00059, 3: 0.00028, 4: 0.00034,<br>5: 0.00023,             | 2: 0.00024, 3: 0.00021,                |
| AZOLI_0771 | 1: 0.00014, 2: 0.00015,<br>4: 0.00008,             | 2: 0.00009, 4: 0.00008,                            | AZOBR_40053 |                                                                |                                        |
| AZOLI_0773 | 1: 0.00017, 2: 0.00023,<br>4: 0.00054,             | 1: 0.00047, 3: 0.00018,<br>4: 0.00020,             | AZOBR_40054 | 3: 0.00024,                                                    |                                        |
| AZOLI_0775 | 1: 0.00004, 2: 0.00004,<br>3: 0.00025, 4: 0.00005, | 1: 0.00004, 2: 0.00006,<br>4: 0.00003,             | AZOBR_40057 |                                                                |                                        |
| AZOLI_0776 | 1: 0.00129, 2: 0.00103,<br>3: 0.00096, 4: 0.00100, | 1: 0.00076, 2: 0.00060,<br>3: 0.00066, 4: 0.00029, | AZOBR_40058 |                                                                | 1: 0.00005, 3: 0.00003,                |
| AZOLI_0783 |                                                    | 2: 0.00011,                                        | AZOBR_40059 |                                                                |                                        |
| AZOLI_0785 | 1: 0.01447, 2: 0.01128,<br>3: 0.01017, 4: 0.01102, | 1: 0.01026, 2: 0.00803,<br>3: 0.00875, 4: 0.00788, | AZOBR_40062 |                                                                |                                        |
| AZOLI_0788 | 1: 0.00005, 2: 0.00008,<br>3: 0.00005, 4: 0.00003, | 1: 0.00007, 2: 0.00005,<br>3: 0.00009, 4: 0.00007, | AZOBR_40064 |                                                                |                                        |
| AZOLI_0789 | 1: 0.00011,                                        | 4: 0.00003,                                        | AZOBR_40067 |                                                                | 2: 0.00002, 3: 0.00005,                |
| AZOLI_0794 | 4: 0.00007,                                        | 3: 0.00007, 4: 0.00007,                            | AZOBR_40075 | 2: 0.00056, 3: 0.00062, 4: 0.00031,<br>5: 0.00031,             | 2: 0.00053, 3: 0.00040,                |
| AZOLI_0796 | 1: 0.00014, 2: 0.00010,<br>3: 0.00007, 4: 0.00010, | 1: 0.00015, 2: 0.00009,<br>3: 0.00010, 4: 0.00017, | AZOBR_40081 |                                                                |                                        |
| AZOLI_0797 | 4: 0.00012,                                        | 1: 0.00005, 3: 0.00006,<br>4: 0.00012,             | AZOBR_40082 |                                                                | 2: 0.00004,                            |
| AZOLI_0802 | 1: 0.00060, 2: 0.00060,<br>3: 0.00072, 4: 0.00048, | 1: 0.00048, 2: 0.00058,<br>3: 0.00023, 4: 0.00030, | AZOBR_40083 |                                                                | 1: 0.00006, 3: 0.00006,                |
| AZOLI_0803 | 1: 0.00289, 2: 0.00261,<br>3: 0.00161, 4: 0.00109, | 1: 0.00159, 2: 0.00129,<br>3: 0.00123, 4: 0.00104, | AZOBR_40084 |                                                                |                                        |
| AZOLI_0809 | 2: 0.00010, 4: 0.00009,                            |                                                    | AZOBR_40085 |                                                                |                                        |
| AZOLI_0810 | 1: 0.00227, 2: 0.00296,<br>3: 0.00366, 4: 0.00278, | 1: 0.00312, 2: 0.00268,<br>3: 0.00275, 4: 0.00247, | AZOBR_40086 |                                                                | 1: 0.00015, 2: 0.00011,<br>3: 0.00015, |
| AZOLI_0814 | 4: 0.00004,                                        |                                                    | AZOBR_40087 | 3: 0.00040, 4: 0.00043,                                        | 3: 0.00029,                            |
| AZOLI_0815 | 1: 0.00496, 2: 0.00470,<br>3: 0.00823, 4: 0.00454, | 1: 0.00603, 2: 0.00643,<br>3: 0.00652, 4: 0.00610, | AZOBR_40088 | 3: 0.00037, 4: 0.00083, 5: 0.00068,                            | 1: 0.00056, 2: 0.00056,<br>3: 0.00027, |
| AZOLI_0816 | 1: 0.00034, 2: 0.00036,<br>3: 0.00019, 4: 0.00023, | 1: 0.00041, 2: 0.00055,<br>3: 0.00031, 4: 0.00035, | AZOBR_40089 |                                                                | 1: 0.00003, 2: 0.00016,<br>3: 0.00009, |
| AZOLI_0820 | 2: 0.00046, 4: 0.00053,                            | 1: 0.00047, 2: 0.00119,<br>3: 0.00098, 4: 0.00053, | AZOBR_40090 | 1: 0.00055, 2: 0.00029, 3: 0.00056,<br>4: 0.00036, 5: 0.00020, | 1: 0.00015, 2: 0.00021,<br>3: 0.00020, |
| AZOLI_0821 | 1: 0.00033, 4: 0.00048,                            | 2: 0.00032,                                        | AZOBR_40091 | 1: 0.00013, 3: 0.00022, 4: 0.00009,<br>5: 0.00032,             | 2: 0.00029, 3: 0.00016,                |
| AZOLI_0822 | 2: 0.00012,                                        | 1: 0.00024, 4: 0.00020,                            | AZOBR_40092 | 1: 0.00429, 2: 0.00518, 3: 0.00480,<br>4: 0.00408, 5: 0.00491, | 1: 0.00389, 2: 0.00437,<br>3: 0.00392, |
| AZOLI_0823 | 2: 0.00013,                                        |                                                    | AZOBR_40094 | 4: 0.00053, 5: 0.00021,                                        | 1: 0.00129, 2: 0.00124,<br>3: 0.00134, |
| AZOLI_0824 | 1: 0.00032, 2: 0.00014,<br>3: 0.00038, 4: 0.00051, | 1: 0.00041, 2: 0.00062,<br>3: 0.00058, 4: 0.00055, | AZOBR_40095 |                                                                | 1: 0.00043, 3: 0.00042,                |
| AZOLI_0826 | 1: 0.00027, 2: 0.00011,<br>4: 0.00019,             | 1: 0.00017, 2: 0.00011,<br>3: 0.00023, 4: 0.00009, | AZOBR_40096 |                                                                |                                        |
| AZOLI_0827 | 1: 0.00016, 2: 0.00010,<br>4: 0.00008,             |                                                    | AZOBR_40097 |                                                                |                                        |
| AZOLI_0832 | 1: 0.00068, 2: 0.00089,<br>3: 0.00053, 4: 0.00061, | 1: 0.00069, 2: 0.00071,<br>3: 0.00059, 4: 0.00046, | AZOBR_40099 |                                                                |                                        |
| AZOLI_0833 | 2: 0.00052, 3: 0.00083,<br>4: 0.00051,             | 1: 0.00022, 4: 0.00013,                            | AZOBR_40100 | 1: 0.00110, 2: 0.00081, 3: 0.00073,<br>4: 0.00101, 5: 0.00068, | 1: 0.00055, 2: 0.00049,<br>3: 0.00046, |
| AZOLI_0835 | 1: 0.00051, 2: 0.00072,<br>4: 0.00065,             | 1: 0.00072, 2: 0.00054,<br>3: 0.00063, 4: 0.00048, | AZOBR_40101 | 1: 0.00047, 2: 0.00042, 3: 0.00035,<br>4: 0.00028, 5: 0.00023, | 1: 0.00017, 2: 0.00010,<br>3: 0.00017, |
| AZOLI_0837 | 1: 0.00014, 2: 0.00012,<br>3: 0.00035, 4: 0.00014, | 1: 0.00004, 2: 0.00009,<br>4: 0.00009,             | AZOBR_40103 | 1: 0.00060, 2: 0.00137, 3: 0.00063,<br>4: 0.00079, 5: 0.00056, | 1: 0.00082, 2: 0.00078,<br>3: 0.00104, |
| AZOLI_0839 | 1: 0.00008,                                        | 1: 0.00016, 2: 0.00027,<br>3: 0.00009,             | AZOBR_40106 |                                                                |                                        |
| AZOLI_0842 | 1: 0.00010, 2: 0.00028,<br>3: 0.00039, 4: 0.00018, | 1: 0.00028, 2: 0.00017,<br>3: 0.00019, 4: 0.00033, | AZOBR_40107 | 1: 0.00204, 2: 0.00326, 3: 0.00257,<br>4: 0.00304, 5: 0.00281, | 1: 0.00362, 2: 0.00325,<br>3: 0.00382, |
| AZOLI_0847 | 2: 0.00005, 3: 0.00007,                            |                                                    | AZOBR_40108 | 3: 0.00022, 4: 0.00024, 5: 0.00012,                            | 1: 0.00049, 2: 0.00050,                |

|            |                                                    |                                                    |             |                                                                |                                                                   |
|------------|----------------------------------------------------|----------------------------------------------------|-------------|----------------------------------------------------------------|-------------------------------------------------------------------|
|            | 4: 0.00021,                                        |                                                    |             |                                                                | 3: 0.00069,                                                       |
| AZOLI_0848 |                                                    | 4: 0.00007,                                        | AZOBR_40110 |                                                                |                                                                   |
| AZOLI_0851 |                                                    | 2: 0.00009,                                        | AZOBR_40113 | 5: 0.00006,                                                    | 2: 0.00006,                                                       |
| AZOLI_0852 | 3: 0.00041, 4: 0.00014,                            | 1: 0.00055, 2: 0.00040,<br>3: 0.00049, 4: 0.00050, | AZOBR_40116 | 1: 0.00032, 2: 0.00028, 3: 0.00027,<br>4: 0.00056, 5: 0.00044, | 1: 0.00083, 2: 0.00059,<br>3: 0.00060,                            |
| AZOLI_0854 | 4: 0.00014,                                        |                                                    | AZOBR_40117 | 1: 0.00018,                                                    | 1: 0.00034, 3: 0.00022,                                           |
| AZOLI_0859 | 1: 0.00285, 2: 0.00287,<br>3: 0.00206, 4: 0.00305, | 1: 0.00297, 2: 0.00203,<br>3: 0.00223, 4: 0.00226, | AZOBR_40118 | 1: 0.00014, 3: 0.00024, 4: 0.00015,                            | 3: 0.00009,                                                       |
| AZOLI_0861 | 2: 0.00031, 3: 0.00066,<br>4: 0.00054,             | 1: 0.00040, 2: 0.00038,<br>3: 0.00042, 4: 0.00027, | AZOBR_40120 | 1: 0.00012, 2: 0.00014, 3: 0.00016,<br>4: 0.00016, 5: 0.00008, | 1: 0.00012, 2: 0.00006,<br>3: 0.00012,                            |
| AZOLI_0862 | 1: 0.00073, 2: 0.00076,<br>3: 0.00144, 4: 0.00088, | 1: 0.00077, 2: 0.00071,<br>3: 0.00070, 4: 0.00104, | AZOBR_40127 | 4: 0.00004,                                                    | 1: 0.00003, 2: 0.00006,<br>3: 0.00012,                            |
| AZOLI_0867 | 2: 0.00014,                                        |                                                    | AZOBR_40128 |                                                                |                                                                   |
| AZOLI_0868 | 1: 0.00081, 2: 0.00099,<br>3: 0.00033, 4: 0.00100, | 1: 0.00129, 2: 0.00147,<br>3: 0.00124, 4: 0.00085, | AZOBR_40130 | 1: 0.00032, 2: 0.00060, 3: 0.00062,<br>4: 0.00063, 5: 0.00072, | 1: 0.00050, 2: 0.00057,<br>3: 0.00062,                            |
| AZOLI_0870 | 1: 0.00033, 2: 0.00027,<br>4: 0.00026,             | 1: 0.00058, 2: 0.00035,<br>3: 0.00067, 4: 0.00041, | AZOBR_40135 | 4: 0.00019, 5: 0.00028,                                        |                                                                   |
| AZOLI_0871 | 1: 0.00064, 2: 0.00088,<br>3: 0.00057, 4: 0.00080, | 1: 0.00094, 2: 0.00102,<br>3: 0.00093, 4: 0.00055, | AZOBR_40136 | 1: 0.00141, 2: 0.00066, 3: 0.00068,<br>4: 0.00097, 5: 0.00052, | 1: 0.00042, 2: 0.00051,<br>3: 0.00064,                            |
| AZOLI_0873 | 4: 0.00012,                                        |                                                    | AZOBR_40139 | 1: 0.00013, 2: 0.00041, 3: 0.00011,<br>4: 0.00041, 5: 0.00036, | 1: 0.00013, 2: 0.00019,<br>3: 0.00041,                            |
| AZOLI_0875 | 4: 0.00015,                                        | 3: 0.00025,                                        | AZOBR_40140 | 1: 0.00015, 3: 0.00006, 4: 0.00009,<br>5: 0.00005,             | 1: 0.00005, 2: 0.00009,<br>3: 0.00005,                            |
| AZOLI_0876 | 3: 0.00180,                                        | 1: 0.00167, 2: 0.00143,                            | AZOBR_40142 | 1: 0.00073, 2: 0.00024, 3: 0.00023,<br>4: 0.00025, 5: 0.00031, | 1: 0.00023, 2: 0.00040,                                           |
| AZOLI_0877 | 4: 0.00006,                                        | 4: 0.00006,                                        | AZOBR_40143 |                                                                |                                                                   |
| AZOLI_0878 | 2: 0.00014, 4: 0.00009,                            | 2: 0.00007,                                        | AZOBR_40155 |                                                                |                                                                   |
| AZOLI_0880 | 1: 0.00103, 2: 0.00145,<br>3: 0.00116, 4: 0.00089, | 1: 0.00042, 2: 0.00050,<br>3: 0.00033, 4: 0.00027, | AZOBR_40156 |                                                                |                                                                   |
| AZOLI_0918 | 1: 0.00024, 2: 0.00041,<br>4: 0.00042,             |                                                    | AZOBR_40157 |                                                                |                                                                   |
| AZOLI_0922 | 1: 0.00007, 2: 0.00015,<br>4: 0.00006,             | 1: 0.00026, 2: 0.00025,<br>3: 0.00012, 4: 0.00009, | AZOBR_40166 | 2: 0.00020, 3: 0.00025, 4: 0.00021,<br>5: 0.00010,             | 1: 0.00067, 2: 0.00054,<br>3: 0.00047,                            |
| AZOLI_0923 | 2: 0.00051, 4: 0.00060,                            | 1: 0.00051, 2: 0.00020,<br>3: 0.00043, 4: 0.00052, | AZOBR_40167 |                                                                |                                                                   |
| AZOLI_0924 | 1: 0.00030, 2: 0.00083,<br>3: 0.00038, 4: 0.00099, | 1: 0.00030, 2: 0.00037,<br>3: 0.00035, 4: 0.00028, | AZOBR_40170 | 1: 0.00023, 2: 0.00007, 3: 0.00010,<br>4: 0.00040, 5: 0.00035, | 1: 0.00015, 2: 0.00011,<br>3: 0.00041,                            |
| AZOLI_0928 | 1: 0.00099, 2: 0.00117,<br>3: 0.00123, 4: 0.00073, | 1: 0.00112, 2: 0.00099,<br>3: 0.00146, 4: 0.00113, | AZOBR_40175 | 1: 0.00013, 2: 0.00015, 3: 0.00011,<br>4: 0.00018, 5: 0.00018, | 1: 0.00016, 2: 0.00009,<br>3: 0.00032,                            |
| AZOLI_0929 | 1: 0.00051, 2: 0.00059,<br>3: 0.00166, 4: 0.00158, | 1: 0.00060, 2: 0.00065,<br>3: 0.00055, 4: 0.00089, | AZOBR_40178 | 1: 0.00015, 2: 0.00006, 3: 0.00016,<br>4: 0.00020, 5: 0.00005, | 1: 0.00009, 2: 0.00011,<br>3: 0.00011,                            |
| AZOLI_0931 | 1: 0.00016, 2: 0.00013,                            | 1: 0.00004,                                        | AZOBR_40179 | 1: 0.00026, 2: 0.00009, 3: 0.00013,<br>4: 0.00021, 5: 0.00014, | 1: 0.00019, 2: 0.00015,<br>3: 0.00019,                            |
| AZOLI_0932 | 1: 0.00034, 2: 0.00032,<br>3: 0.00041, 4: 0.00055, | 1: 0.00045, 2: 0.00033,<br>3: 0.00056, 4: 0.00053, | AZOBR_40180 | 1: 0.00033, 2: 0.00011, 3: 0.00028,<br>4: 0.00022, 5: 0.00027, | 2: 0.00014,                                                       |
| AZOLI_0938 | 3: 0.00016,                                        |                                                    | AZOBR_40181 |                                                                | 1: 0.00003, 2: 0.00004,                                           |
| AZOLI_0952 | 4: 0.00035,                                        |                                                    | AZOBR_40182 |                                                                |                                                                   |
| AZOLI_0958 |                                                    | 1: 0.00025,                                        | AZOBR_40183 | 1: 0.00014, 2: 0.00012, 3: 0.00012,<br>4: 0.00028, 5: 0.00009, | 1: 0.00031, 2: 0.00025,<br>3: 0.00013,                            |
| AZOLI_0961 | 1: 0.00013, 2: 0.00021,<br>4: 0.00013,             |                                                    | AZOBR_40185 | 2: 0.00009, 3: 0.00011, 4: 0.00007,<br>5: 0.00007,             | 1: 0.00006, 2: 0.00012,<br>3: 0.00010,                            |
| AZOLI_0964 | 1: 0.00202, 2: 0.00209,<br>3: 0.00067, 4: 0.00215, | 1: 0.00092, 2: 0.00078,<br>3: 0.00057, 4: 0.00060, | AZOBR_40187 | 1: 0.00038, 2: 0.00034, 3: 0.00033,<br>4: 0.00079, 5: 0.00055, | 1: 0.00022, 2: 0.00014,<br>3: 0.00022,                            |
| AZOLI_0966 | 1: 0.00005, 4: 0.00006,                            |                                                    | AZOBR_40188 | 1: 0.01042, 2: 0.00690, 3: 0.00919,<br>4: 0.00444, 5: 0.00428, | 1: 0.01121, 2: 0.01003,<br>3: 0.00447,                            |
| AZOLI_0967 |                                                    | 4: 0.00007,                                        | AZOBR_40189 |                                                                | 2: 0.00011, 3: 0.00009,<br>4: 0.00017, 2: 0.00012,<br>3: 0.00017, |
| AZOLI_0969 | 1: 0.00023, 2: 0.00046,<br>3: 0.00127, 4: 0.00052, | 1: 0.00038, 2: 0.00029,<br>3: 0.00032, 4: 0.00039, | AZOBR_40190 | 1: 0.00011, 2: 0.00010, 3: 0.00009,<br>4: 0.00019, 5: 0.00015, | 1: 0.00017, 2: 0.00012,<br>3: 0.00017,                            |
| AZOLI_0972 |                                                    | 2: 0.00004, 3: 0.00004,<br>4: 0.00005,             | AZOBR_40191 | 1: 0.00085, 2: 0.00084, 3: 0.00144,<br>4: 0.00226, 5: 0.00241, | 1: 0.00278, 2: 0.00062,<br>3: 0.00290,                            |
| AZOLI_0975 |                                                    | 1: 0.00016, 3: 0.00025,<br>4: 0.00034,             | AZOBR_40194 | 1: 0.00137, 2: 0.00154, 3: 0.00116,<br>4: 0.00113, 5: 0.00109, | 1: 0.00139, 2: 0.00113,<br>3: 0.00106,                            |
| AZOLI_0980 |                                                    | 4: 0.00014,                                        | AZOBR_40199 | 5: 0.00012,                                                    |                                                                   |
| AZOLI_0983 | 1: 0.00026, 2: 0.00020,<br>3: 0.00006, 4: 0.00034, | 1: 0.00007, 2: 0.00011,<br>3: 0.00014, 4: 0.00011, | AZOBR_40200 | 1: 0.00041, 2: 0.00012, 3: 0.00019,<br>4: 0.00034, 5: 0.00016, | 1: 0.00006, 2: 0.00013,<br>3: 0.00006,                            |
| AZOLI_0984 | 1: 0.00020, 2: 0.00010,<br>4: 0.00026,             | 2: 0.00010, 3: 0.00021,<br>4: 0.00026,             | AZOBR_40201 | 1: 0.00052, 2: 0.00076, 3: 0.00037,<br>4: 0.00065, 5: 0.00042, | 1: 0.00033, 3: 0.00032,                                           |
| AZOLI_0990 | 1: 0.00574, 2: 0.00546,<br>3: 0.00751, 4: 0.00418, | 1: 0.00377, 2: 0.00418,<br>3: 0.00286, 4: 0.00377, | AZOBR_40202 | 1: 0.00363, 2: 0.00371, 3: 0.00455,<br>4: 0.00355, 5: 0.00329, | 1: 0.00171, 2: 0.00195,<br>3: 0.00226,                            |
| AZOLI_0991 | 1: 0.00020, 4: 0.00035,                            | 1: 0.00020, 3: 0.00029,<br>4: 0.00035,             | AZOBR_40203 | 1: 0.00631, 2: 0.00632, 3: 0.00734,<br>4: 0.00739, 5: 0.01117, | 1: 0.00485, 2: 0.00444,<br>3: 0.00418,                            |
| AZOLI_0997 | 1: 0.00015,                                        | 4: 0.00013,                                        | AZOBR_40205 |                                                                |                                                                   |
| AZOLI_1001 |                                                    | 2: 0.00029,                                        | AZOBR_40207 |                                                                | 1: 0.00021, 2: 0.00014,<br>3: 0.00035,                            |
| AZOLI_1007 |                                                    | 1: 0.00013, 4: 0.00007,                            | AZOBR_40208 | 1: 0.00012, 2: 0.00016, 3: 0.00020,<br>4: 0.00020, 5: 0.00012, | 1: 0.00008,                                                       |
| AZOLI_1009 | 1: 0.00009, 2: 0.00005,<br>4: 0.00006,             | 1: 0.00016, 2: 0.00013,<br>3: 0.00020, 4: 0.00010, | AZOBR_40209 | 3: 0.00014, 4: 0.00008, 5: 0.00008,                            | 1: 0.00018, 2: 0.00016,<br>3: 0.00031,                            |
| AZOLI_1010 | 1: 0.00034, 2: 0.00054,<br>3: 0.00256, 4: 0.00134, | 1: 0.00137, 2: 0.00092,<br>3: 0.00101, 4: 0.00157, | AZOBR_40210 | 4: 0.00011, 5: 0.00017,                                        |                                                                   |
| AZOLI_1011 | 1: 0.00024, 2: 0.00021,<br>3: 0.00013, 4: 0.00028, | 1: 0.00015, 2: 0.00017,<br>3: 0.00019, 4: 0.00021, | AZOBR_40211 | 1: 0.00029, 2: 0.00013, 3: 0.00015,<br>4: 0.00030, 5: 0.00030, | 1: 0.00005, 2: 0.00010,<br>3: 0.00004,                            |
| AZOLI_1015 | 1: 0.00006, 3: 0.00007,<br>4: 0.00004,             | 1: 0.00013, 2: 0.00006,<br>3: 0.00018, 4: 0.00010, | AZOBR_40214 | 3: 0.00008, 4: 0.00008, 5: 0.00006,                            |                                                                   |
| AZOLI_1016 | 4: 0.00025,                                        | 1: 0.00022, 2: 0.00021,<br>4: 0.00043,             | AZOBR_40216 | 1: 0.00005,                                                    | 2: 0.00004, 3: 0.00005,                                           |
| AZOLI_1018 | 4: 0.00004,                                        | 1: 0.00003,                                        | AZOBR_40218 | 1: 0.00047, 2: 0.00041, 3: 0.00062,<br>4: 0.00079, 5: 0.00079, | 1: 0.00157, 2: 0.00174,<br>3: 0.00152,                            |
| AZOLI_1020 | 4: 0.00005,                                        | 1: 0.00005, 2: 0.00011,<br>4: 0.00005,             | AZOBR_40223 |                                                                | 2: 0.00018, 3: 0.00009,                                           |

|            |                                                    |                                                    |             |                                                                |                                        |
|------------|----------------------------------------------------|----------------------------------------------------|-------------|----------------------------------------------------------------|----------------------------------------|
| AZOLI_1024 | 2: 0.00010, 4: 0.00011,                            | 2: 0.00006,                                        | AZOBR_40227 |                                                                |                                        |
| AZOLI_1029 |                                                    | 1: 0.00020, 2: 0.00020,                            | AZOBR_40228 |                                                                | 2: 0.00008, 3: 0.00003,                |
| AZOLI_1030 | 1: 0.00059, 2: 0.00020,<br>4: 0.00034,             | 2: 0.00029, 3: 0.00063,                            | AZOBR_40232 |                                                                |                                        |
| AZOLI_1033 | 4: 0.00007,                                        |                                                    | AZOBR_40233 | 1: 0.00021, 3: 0.00042, 4: 0.00024,<br>5: 0.00010,             | 1: 0.00027, 2: 0.00015,<br>3: 0.00026, |
| AZOLI_1036 | 2: 0.00005, 3: 0.00006,<br>4: 0.00019,             | 1: 0.00007, 2: 0.00007,<br>3: 0.00012, 4: 0.00008, | AZOBR_40234 |                                                                |                                        |
| AZOLI_1037 | 1: 0.00011, 2: 0.00027,<br>4: 0.00033,             | 1: 0.00004, 2: 0.00005,<br>3: 0.00012, 4: 0.00008, | AZOBR_40238 | 1: 0.00028, 2: 0.00025, 3: 0.00035,<br>4: 0.00020, 5: 0.00025, | 1: 0.00008, 3: 0.00015,                |
| AZOLI_1047 | 1: 0.00083, 2: 0.00118,<br>4: 0.00126,             | 1: 0.00061, 2: 0.00071,<br>3: 0.00054, 4: 0.00055, | AZOBR_40241 | 1: 0.00036, 2: 0.00043, 3: 0.00046,<br>4: 0.00037, 5: 0.00037, | 1: 0.00027, 2: 0.00018,<br>3: 0.00015, |
| AZOLI_1055 | 1: 0.00033, 2: 0.00039,<br>3: 0.00029, 4: 0.00039, | 1: 0.00043, 2: 0.00031,<br>3: 0.00034, 4: 0.00037, | AZOBR_40244 |                                                                | 1: 0.00002,                            |
| AZOLI_1061 | 4: 0.00005,                                        | 4: 0.00005,                                        | AZOBR_40250 |                                                                |                                        |
| AZOLI_1062 |                                                    | 1: 0.00038, 2: 0.00023,<br>3: 0.00015, 4: 0.00024, | AZOBR_40252 |                                                                | 3: 0.00004,                            |
| AZOLI_1063 | 1: 0.00074, 2: 0.00112,<br>3: 0.00067, 4: 0.00059, | 1: 0.00059, 2: 0.00051,<br>3: 0.00062, 4: 0.00045, | AZOBR_40253 | 1: 0.00009, 4: 0.00006,                                        | 1: 0.00008, 2: 0.00012,<br>3: 0.00019, |
| AZOLI_1064 | 1: 0.00016, 2: 0.00008,<br>3: 0.00017, 4: 0.00010, | 1: 0.00024, 2: 0.00008,<br>3: 0.00038, 4: 0.00010, | AZOBR_40257 |                                                                | 1: 0.00003,                            |
| AZOLI_1068 | 1: 0.00023, 2: 0.00032,<br>3: 0.00028, 4: 0.00025, | 1: 0.00017, 2: 0.00039,<br>3: 0.00025, 4: 0.00027, | AZOBR_40259 | 1: 0.00036,                                                    |                                        |
| AZOLI_1069 | 1: 0.00033, 2: 0.00034,<br>3: 0.00016, 4: 0.00053, | 1: 0.00040, 2: 0.00042,<br>3: 0.00054, 4: 0.00040, | AZOBR_40262 |                                                                | 1: 0.00003, 2: 0.00005,                |
| AZOLI_1070 | 1: 0.00283, 2: 0.00220,<br>3: 0.00386, 4: 0.00285, | 1: 0.00137, 2: 0.00174,<br>3: 0.00177, 4: 0.00188, | AZOBR_40263 |                                                                |                                        |
| AZOLI_1071 | 1: 0.00795, 2: 0.00715,<br>3: 0.00802, 4: 0.00670, | 1: 0.00474, 2: 0.00567,<br>3: 0.00662, 4: 0.00583, | AZOBR_40268 | 2: 0.00015, 4: 0.00012,                                        | 3: 0.00017,                            |
| AZOLI_1072 | 3: 0.00070, 4: 0.00016,                            | 1: 0.00046, 2: 0.00048,<br>3: 0.00087, 4: 0.00055, | AZOBR_40269 |                                                                |                                        |
| AZOLI_1073 | 1: 0.00131, 2: 0.00119,<br>3: 0.00221, 4: 0.00214, | 1: 0.00119, 2: 0.00109,<br>3: 0.00168, 4: 0.00249, | AZOBR_40270 |                                                                | 3: 0.00021,                            |
| AZOLI_1078 | 3: 0.00020,                                        |                                                    | AZOBR_40271 | 1: 0.00017,                                                    | 3: 0.00007,                            |
| AZOLI_1079 | 1: 0.00148, 2: 0.00229,<br>3: 0.00089, 4: 0.00260, | 1: 0.00209, 2: 0.00176,<br>3: 0.00165, 4: 0.00169, | AZOBR_40272 |                                                                | 1: 0.00021,                            |
| AZOLI_1080 |                                                    | 1: 0.00014, 4: 0.00018,                            | AZOBR_40273 |                                                                |                                        |
| AZOLI_1081 | 1: 0.00017, 2: 0.00048,<br>3: 0.00066, 4: 0.00044, | 1: 0.00048, 2: 0.00071,<br>3: 0.00041, 4: 0.00030, | AZOBR_40274 | 1: 0.00475, 2: 0.00395, 3: 0.00381,<br>4: 0.00308, 5: 0.00402, | 1: 0.00243, 2: 0.00326,<br>3: 0.00118, |
| AZOLI_1088 | 1: 0.00075, 2: 0.00112,<br>3: 0.00015, 4: 0.00062, | 1: 0.00074, 2: 0.00091,<br>3: 0.00081, 4: 0.00060, | AZOBR_40275 | 1: 0.00015, 3: 0.00013, 5: 0.00010,                            |                                        |
| AZOLI_1089 | 1: 0.00034, 2: 0.00034,<br>3: 0.00071, 4: 0.00054, | 1: 0.00098, 2: 0.00064,<br>3: 0.00070, 4: 0.00077, | AZOBR_40277 | 1: 0.00226, 2: 0.00261, 3: 0.00199,<br>4: 0.00141, 5: 0.00219, | 1: 0.00168, 2: 0.00218,<br>3: 0.00154, |
| AZOLI_1091 | 1: 0.00028, 2: 0.00048,<br>4: 0.00033,             | 1: 0.00014,                                        | AZOBR_40279 |                                                                |                                        |
| AZOLI_1092 |                                                    | 4: 0.00009,                                        | AZOBR_40280 | 1: 0.00014, 2: 0.00012, 4: 0.00014,                            | 1: 0.00009, 2: 0.00015,<br>3: 0.00026, |
| AZOLI_1093 | 1: 0.00014,                                        |                                                    | AZOBR_40283 |                                                                |                                        |
| AZOLI_1094 | 1: 0.00022, 2: 0.00044,<br>4: 0.00012,             | 1: 0.00022, 3: 0.00031,                            | AZOBR_40286 |                                                                |                                        |
| AZOLI_1095 | 1: 0.00025, 2: 0.00030,<br>3: 0.00018, 4: 0.00026, | 1: 0.00030, 2: 0.00008,<br>3: 0.00032, 4: 0.00018, | AZOBR_40288 |                                                                |                                        |
| AZOLI_1096 | 1: 0.00016, 3: 0.00014,<br>4: 0.00006,             | 1: 0.00013, 2: 0.00019,<br>3: 0.00007, 4: 0.00009, | AZOBR_40290 |                                                                |                                        |
| AZOLI_1097 | 1: 0.00101, 2: 0.00057,<br>3: 0.00032, 4: 0.00072, | 1: 0.00011, 2: 0.00011,<br>3: 0.00018, 4: 0.00010, | AZOBR_40292 | 1: 0.00040, 2: 0.00061, 3: 0.00088,<br>4: 0.00075, 5: 0.00077, | 1: 0.00030, 2: 0.00032,<br>3: 0.00052, |
| AZOLI_1102 |                                                    | 4: 0.00003,                                        | AZOBR_40299 | 1: 0.00186, 2: 0.00141, 3: 0.00136,<br>4: 0.00083, 5: 0.00115, | 1: 0.00060, 2: 0.00097,<br>3: 0.00066, |
| AZOLI_1103 | 1: 0.00268, 2: 0.00235,<br>3: 0.00214, 4: 0.00164, | 1: 0.00173, 2: 0.00178,<br>3: 0.00159, 4: 0.00138, | AZOBR_40300 |                                                                |                                        |
| AZOLI_1104 | 1: 0.00014, 4: 0.00043,                            |                                                    | AZOBR_40301 | 4: 0.00012,                                                    |                                        |
| AZOLI_1105 | 1: 0.00013,                                        | 1: 0.00010, 2: 0.00016,<br>3: 0.00011,             | AZOBR_40303 | 1: 0.01121, 2: 0.01038, 3: 0.00863,<br>4: 0.00624, 5: 0.00646, | 1: 0.00689, 2: 0.00755,<br>3: 0.00482, |
| AZOLI_1107 | 1: 0.00016, 2: 0.00027,<br>4: 0.00032,             | 1: 0.00016, 2: 0.00010,<br>3: 0.00017, 4: 0.00009, | AZOBR_40304 | 1: 0.00237, 2: 0.00244, 3: 0.00221,<br>4: 0.00212, 5: 0.00279, | 1: 0.00214, 2: 0.00218,<br>3: 0.00193, |
| AZOLI_1109 | 1: 0.00012,                                        |                                                    | AZOBR_40305 | 1: 0.00044, 2: 0.00087, 3: 0.00075,<br>4: 0.00105, 5: 0.00105, | 1: 0.00113, 2: 0.00075,<br>3: 0.00146, |
| AZOLI_1110 | 1: 0.00010, 2: 0.00010,<br>4: 0.00017,             | 1: 0.00014,                                        | AZOBR_40306 | 1: 0.00573, 2: 0.00401, 3: 0.00423,<br>4: 0.00330, 5: 0.00314, | 1: 0.00340, 2: 0.00424,<br>3: 0.00307, |
| AZOLI_1115 |                                                    | 1: 0.00013, 2: 0.00016,<br>4: 0.00019,             | AZOBR_40307 | 1: 0.00191, 2: 0.00084, 3: 0.00090,<br>4: 0.00117, 5: 0.00095, | 1: 0.00231, 2: 0.00293,<br>3: 0.00165, |
| AZOLI_1116 | 1: 0.00058, 2: 0.00044,<br>4: 0.00099,             | 1: 0.00051, 2: 0.00028,<br>3: 0.00023, 4: 0.00075, | AZOBR_40309 | 2: 0.00016, 3: 0.00022, 4: 0.00018,<br>5: 0.00012,             | 2: 0.00019, 3: 0.00022,                |
| AZOLI_1119 | 2: 0.00008,                                        | 1: 0.00011, 2: 0.00014,<br>3: 0.00006, 4: 0.00007, | AZOBR_40310 |                                                                |                                        |
| AZOLI_1123 | 2: 0.00025,                                        | 1: 0.00008,                                        | AZOBR_40311 | 1: 0.00101, 2: 0.00135, 3: 0.00091,<br>4: 0.00076, 5: 0.00091, | 1: 0.00157, 2: 0.00136,<br>3: 0.00156, |
| AZOLI_1126 | 1: 0.00010,                                        |                                                    | AZOBR_40312 |                                                                | 3: 0.00008,                            |
| AZOLI_1134 | 1: 0.00008, 2: 0.00003,<br>4: 0.00007,             |                                                    | AZOBR_40313 | 4: 0.00008, 5: 0.00008,                                        |                                        |
| AZOLI_1135 | 1: 0.00127, 2: 0.00116,<br>3: 0.00134, 4: 0.00118, | 1: 0.00053, 2: 0.00077,<br>3: 0.00098, 4: 0.00059, | AZOBR_40314 | 2: 0.00010, 3: 0.00014, 4: 0.00008,<br>5: 0.00012,             | 1: 0.00005, 2: 0.00004,<br>3: 0.00010, |
| AZOLI_1137 |                                                    | 1: 0.00006, 2: 0.00019,<br>3: 0.00009, 4: 0.00005, | AZOBR_40317 | 1: 0.00030, 3: 0.00017, 4: 0.00034,<br>5: 0.00021,             | 1: 0.00032, 2: 0.00029,<br>3: 0.00043, |
| AZOLI_1143 | 1: 0.00003, 4: 0.00003,                            | 3: 0.00005, 4: 0.00003,                            | AZOBR_40319 | 1: 0.00048, 2: 0.00033, 3: 0.00032,<br>4: 0.00059, 5: 0.00038, | 1: 0.00022, 2: 0.00030,<br>3: 0.00047, |
| AZOLI_1145 | 2: 0.00020, 4: 0.00033,                            | 1: 0.00012, 2: 0.00019,<br>3: 0.00021, 4: 0.00013, | AZOBR_40320 |                                                                |                                        |
| AZOLI_1150 | 4: 0.00002,                                        | 4: 0.00002,                                        | AZOBR_40323 | 5: 0.00008,                                                    | 2: 0.00005, 3: 0.00005,                |
| AZOLI_1151 | 1: 0.00144, 2: 0.00242,                            | 1: 0.00097, 2: 0.00094,                            | AZOBR_40324 | 1: 0.00007, 3: 0.00009, 4: 0.00020,                            | 1: 0.00007, 2: 0.00013,                |

|            |                                                    |                                                                   |             |                                                                |                                        |
|------------|----------------------------------------------------|-------------------------------------------------------------------|-------------|----------------------------------------------------------------|----------------------------------------|
|            | 3: 0.00143, 4: 0.00253,                            | 3: 0.00051, 4: 0.00181,                                           |             | 5: 0.00007,                                                    | 3: 0.00022,                            |
| AZOLI_1154 | 1: 0.00046, 2: 0.00075,<br>4: 0.00080,             | 1: 0.00094, 2: 0.00118,<br>3: 0.00080, 4: 0.00056,                | AZOBR_40325 | 1: 0.00063, 2: 0.00307, 3: 0.00228,<br>4: 0.00663, 5: 0.00403, | 1: 0.00283, 2: 0.00299,<br>3: 0.00216, |
| AZOLI_1158 | 1: 0.00005, 4: 0.00008,                            | 1: 0.00005, 2: 0.00009,<br>4: 0.00008,                            | AZOBR_40326 | 1: 0.00180, 3: 0.00118, 4: 0.00343,<br>5: 0.00248,             | 1: 0.00044, 2: 0.00040,<br>3: 0.00112, |
| AZOLI_1161 |                                                    | 1: 0.00031, 2: 0.00012,<br>3: 0.00019, 4: 0.00026,                | AZOBR_40327 | 1: 0.00016, 4: 0.00007,                                        |                                        |
| AZOLI_1164 | 4: 0.00009,                                        |                                                                   | AZOBR_40335 |                                                                |                                        |
| AZOLI_1165 | 1: 0.00007, 2: 0.00020,<br>4: 0.00004,             | 1: 0.00015, 4: 0.00006,                                           | AZOBR_40339 | 1: 0.00071, 2: 0.00089, 3: 0.00108,<br>4: 0.00098, 5: 0.00114, | 1: 0.00209, 2: 0.00150,<br>3: 0.00158, |
| AZOLI_1166 | 1: 0.00005, 2: 0.00007,<br>4: 0.00011,             | 2: 0.00007,                                                       | AZOBR_40340 | 1: 0.00013, 4: 0.00014,                                        | 3: 0.00008,                            |
| AZOLI_1182 | 1: 0.00012, 2: 0.00012,<br>4: 0.00015,             | 2: 0.00017, 3: 0.00012,<br>4: 0.00025,                            | AZOBR_40341 | 4: 0.00004,                                                    | 1: 0.00013, 3: 0.00003,                |
| AZOLI_1183 | 2: 0.00008, 4: 0.00011,                            | 2: 0.00012, 4: 0.00007,                                           | AZOBR_40343 |                                                                |                                        |
| AZOLI_1187 | 1: 0.00005, 2: 0.00017,<br>4: 0.00014,             | 1: 0.00029, 2: 0.00009,<br>3: 0.00015, 4: 0.00010,                | AZOBR_40346 |                                                                | 3: 0.00013,                            |
| AZOLI_1188 | 1: 0.00014, 2: 0.00039,<br>4: 0.00033,             | 1: 0.00059, 2: 0.00042,<br>3: 0.00062, 4: 0.00067,                | AZOBR_40347 |                                                                | 1: 0.00063, 2: 0.00052,<br>3: 0.00105, |
| AZOLI_1190 | 1: 0.00010, 3: 0.00029,                            | 1: 0.00011, 2: 0.00010,<br>3: 0.00022, 4: 0.00009,                | AZOBR_40349 |                                                                |                                        |
| AZOLI_1191 | 1: 0.00019, 4: 0.00008,                            | 1: 0.00029, 2: 0.00034,<br>3: 0.00028, 4: 0.00025,                | AZOBR_40353 | 2: 0.00012, 4: 0.00023, 5: 0.00018,                            | 1: 0.00013, 3: 0.00012,                |
| AZOLI_1192 | 1: 0.00012, 2: 0.00022,<br>3: 0.00017, 4: 0.00042, | 1: 0.00010, 2: 0.00033,<br>3: 0.00013, 4: 0.00031,                | AZOBR_40354 |                                                                |                                        |
| AZOLI_1196 | 1: 0.00017, 2: 0.00022,<br>4: 0.00015,             | 1: 0.00009, 4: 0.00011,                                           | AZOBR_40356 | 1: 0.00010, 3: 0.00011, 4: 0.00007,<br>5: 0.00007,             | 1: 0.00006, 2: 0.00007,<br>3: 0.00008, |
| AZOLI_1207 | 1: 0.00058, 2: 0.00184,<br>3: 0.00041, 4: 0.00138, | 1: 0.00118, 2: 0.00135,<br>3: 0.00086, 4: 0.00082,                | AZOBR_40357 | 5: 0.00004,                                                    | 3: 0.00006,                            |
| AZOLI_1210 | 1: 0.00033, 2: 0.00020,                            |                                                                   | AZOBR_40362 | 4: 0.00013, 5: 0.00006,                                        | 1: 0.00003, 3: 0.00012,                |
| AZOLI_1212 | 1: 0.00019, 2: 0.00008,<br>4: 0.00013,             |                                                                   | AZOBR_40363 | 1: 0.00051, 3: 0.00010,                                        | 1: 0.00007, 2: 0.00025,                |
| AZOLI_1214 |                                                    | 1: 0.00020, 2: 0.00032,<br>3: 0.00014, 4: 0.00034,                | AZOBR_40364 |                                                                |                                        |
| AZOLI_1215 | 2: 0.00010,                                        | 4: 0.00004,                                                       | AZOBR_40366 | 3: 0.00088,                                                    |                                        |
| AZOLI_1216 | 1: 0.00052, 2: 0.00024,<br>3: 0.00020, 4: 0.00045, | 1: 0.00043, 2: 0.00032,<br>3: 0.00015, 4: 0.00029,                | AZOBR_40367 |                                                                | 1: 0.00028, 3: 0.00083,                |
| AZOLI_1219 | 2: 0.00015, 4: 0.00038,                            | 2: 0.00024,                                                       | AZOBR_40368 | 1: 0.01295, 2: 0.01276, 3: 0.01375,<br>4: 0.01068, 5: 0.00947, | 1: 0.00643, 2: 0.00871,<br>3: 0.00482, |
| AZOLI_1220 | 4: 0.00032,                                        |                                                                   | AZOBR_40371 | 4: 0.00014,                                                    | 2: 0.00012,                            |
| AZOLI_1222 | 1: 0.00050, 2: 0.00064,<br>3: 0.00095, 4: 0.00062, | 1: 0.00087, 2: 0.00066,<br>3: 0.00145, 4: 0.00113,                | AZOBR_40375 | 1: 0.00218, 2: 0.00374, 3: 0.00230,<br>4: 0.00106, 5: 0.00284, | 1: 0.00362, 2: 0.00346,<br>3: 0.00319, |
| AZOLI_1224 | 1: 0.00004, 2: 0.00006,<br>3: 0.00018, 4: 0.00022, | 1: 0.00023, 2: 0.00037,<br>3: 0.00025, 4: 0.00038,                | AZOBR_40376 | 1: 0.00110, 2: 0.00114, 3: 0.00282,<br>4: 0.00114, 5: 0.00089, | 1: 0.00141, 2: 0.00094,<br>3: 0.00148, |
| AZOLI_1226 | 1: 0.00053, 2: 0.00037,<br>4: 0.00085,             | 2: 0.00012, 4: 0.00011,                                           | AZOBR_40378 | 1: 0.00014, 2: 0.00012, 3: 0.00012,<br>4: 0.00014, 5: 0.00005, | 1: 0.00013, 2: 0.00010,<br>3: 0.00023, |
| AZOLI_1227 |                                                    | 2: 0.00026, 4: 0.00011,                                           | AZOBR_40379 | 1: 0.00161, 2: 0.00131, 3: 0.00148,<br>4: 0.00141, 5: 0.00111, | 1: 0.00072, 2: 0.00068,<br>3: 0.00104, |
| AZOLI_1232 | 1: 0.00069, 2: 0.00093,<br>3: 0.00049, 4: 0.00179, | 1: 0.00105, 2: 0.00124,<br>3: 0.00099, 4: 0.00060,                | AZOBR_40382 | 1: 0.00044, 3: 0.00027, 4: 0.00022,                            | 2: 0.00018, 3: 0.00012,                |
| AZOLI_1234 | 1: 0.00042, 4: 0.00026,                            | 1: 0.00025, 2: 0.00012,<br>3: 0.00032, 4: 0.00026,                | AZOBR_40385 | 1: 0.00200, 2: 0.00417, 3: 0.00294,<br>4: 0.00312, 5: 0.00250, | 1: 0.00186, 2: 0.00225,<br>3: 0.00158, |
| AZOLI_1235 | 1: 0.00011, 2: 0.00013,<br>3: 0.00008, 4: 0.00009, | 1: 0.00023, 2: 0.00019,<br>3: 0.00040, 4: 0.00021,                | AZOBR_40386 | 1: 0.00057, 2: 0.00025, 3: 0.00044,<br>4: 0.00039, 5: 0.00024, | 1: 0.00007, 2: 0.00012,<br>3: 0.00011, |
| AZOLI_1243 | 2: 0.00011, 4: 0.00009,                            |                                                                   | AZOBR_40388 | 3: 0.00012,                                                    | 2: 0.00010, 3: 0.00009,                |
| AZOLI_1244 | 1: 0.00014, 2: 0.00021,<br>4: 0.00008,             |                                                                   | AZOBR_40389 | 4: 0.00019, 5: 0.00019,                                        | 1: 0.00079, 2: 0.00090,<br>3: 0.00068, |
| AZOLI_1245 | 1: 0.00009,                                        | 1: 0.00009, 2: 0.00021,<br>3: 0.00041, 4: 0.00007,                | AZOBR_40390 | 1: 0.00013, 2: 0.00033, 3: 0.00037,<br>4: 0.00042, 5: 0.00035, | 1: 0.00006, 2: 0.00005,<br>3: 0.00015, |
| AZOLI_1245 | 2: 0.00020, 3: 0.00018,                            |                                                                   | AZOBR_40394 | 1: 0.00058, 2: 0.00042, 3: 0.00067,<br>4: 0.00029, 5: 0.00022, | 1: 0.00017, 3: 0.00036,                |
| AZOLI_1246 | 2: 0.00025, 4: 0.00022,                            | 4: 0.00011,                                                       | AZOBR_40396 | 4: 0.00019, 5: 0.00008,                                        | 1: 0.00011, 2: 0.00020,<br>3: 0.00021, |
| AZOLI_1252 | 1: 0.00009, 2: 0.00028,<br>3: 0.00060, 4: 0.00016, | 1: 0.00053, 2: 0.00033,<br>3: 0.00062, 4: 0.00021,                | AZOBR_40401 | 1: 0.00138, 2: 0.00162, 3: 0.00141,<br>4: 0.00146, 5: 0.00196, | 1: 0.00259, 2: 0.00288,<br>3: 0.00251, |
| AZOLI_1254 | 1: 0.00013, 2: 0.00008,<br>3: 0.00025, 4: 0.00006, | 1: 0.00008, 2: 0.00015,<br>4: 0.00013,                            | AZOBR_40406 | 1: 0.00013, 2: 0.00014, 3: 0.00008,<br>4: 0.00016, 5: 0.00018, | 1: 0.00008, 2: 0.00012,<br>3: 0.00018, |
| AZOLI_1255 | 1: 0.00011, 2: 0.00015,<br>4: 0.00021,             | 1: 0.00004, 3: 0.00012,<br>4: 0.00006,                            | AZOBR_40407 | 2: 0.00018,                                                    | 1: 0.00013, 2: 0.00006,<br>3: 0.00010, |
| AZOLI_1259 |                                                    | 2: 0.00017,                                                       | AZOBR_40408 | 4: 0.00007,                                                    |                                        |
| AZOLI_1261 | 4: 0.00003,                                        |                                                                   | AZOBR_40409 | 1: 0.00027, 2: 0.00030, 3: 0.00061,<br>4: 0.00042, 5: 0.00042, | 1: 0.00026, 2: 0.00027,<br>3: 0.00023, |
| AZOLI_1263 | 4: 0.00010,                                        | 4: 0.00007,                                                       | AZOBR_40410 | 1: 0.00043, 2: 0.00019, 4: 0.00030,                            | 1: 0.00014, 2: 0.00063,                |
| AZOLI_1270 | 3: 0.00014, 4: 0.00004,                            | 1: 0.00010, 2: 0.00025,<br>3: 0.00024, 4: 0.00039,                | AZOBR_40411 |                                                                | 3: 0.00026,                            |
| AZOLI_1274 | 1: 0.00183, 2: 0.00218,<br>3: 0.00082, 4: 0.00351, | 1: 0.00388, 2: 0.00268,<br>3: 0.00339, 4: 0.00287,                | AZOBR_40414 | 1: 0.00054, 2: 0.00044, 3: 0.00043,<br>4: 0.00045, 5: 0.00040, | 1: 0.00009, 2: 0.00010,<br>3: 0.00020, |
| AZOLI_1275 | 1: 0.00882, 2: 0.00414,<br>3: 0.00525, 4: 0.00675, | 1: 0.00580, 2: 0.00740,<br>3: 0.00881, 4: 0.00827,                | AZOBR_40415 |                                                                |                                        |
| AZOLI_1278 | 3: 0.00015, 4: 0.00005,                            | 1: 0.00004, 2: 0.00008,<br>3: 0.00004, 4: 0.00008,                | AZOBR_40420 | 4: 0.00012,                                                    |                                        |
| AZOLI_1280 | 3: 0.00026, 4: 0.00011,                            | 1: 0.00013, 4: 0.00013,<br>2: 0.00010, 3: 0.00011,<br>4: 0.00027, | AZOBR_40424 |                                                                |                                        |
| AZOLI_1281 | 1: 0.00007, 4: 0.00015,                            | 1: 0.00194, 2: 0.00180,<br>3: 0.00190, 4: 0.00180,                | AZOBR_40426 |                                                                |                                        |
| AZOLI_1291 | 1: 0.00114, 2: 0.00144,<br>3: 0.00064, 4: 0.00153, | 1: 0.00022, 3: 0.00028,<br>4: 0.00034,                            | AZOBR_40427 |                                                                |                                        |
| AZOLI_1297 | 1: 0.00013,                                        |                                                                   | AZOBR_40428 |                                                                |                                        |
| AZOLI_1300 | 1: 0.00041, 2: 0.00021,<br>3: 0.00038, 4: 0.00029, | 1: 0.00021, 2: 0.00013,                                           | AZOBR_40431 |                                                                |                                        |

|            |                                                                   |                                                                               |             |                                                                |                                        |
|------------|-------------------------------------------------------------------|-------------------------------------------------------------------------------|-------------|----------------------------------------------------------------|----------------------------------------|
| AZOLI_1302 |                                                                   | 4: 0.00010,                                                                   | AZOBR_40434 |                                                                |                                        |
| AZOLI_1303 | 4: 0.00024,                                                       | 1: 0.00069, 2: 0.00027,<br>3: 0.00059,                                        | AZOBR_40435 |                                                                |                                        |
| AZOLI_1304 | 1: 0.00045, 2: 0.00023,<br>4: 0.00020,                            |                                                                               | AZOBR_40436 |                                                                |                                        |
| AZOLI_1307 | 1: 0.00037, 2: 0.00038,<br>4: 0.00056,                            | 1: 0.00066, 2: 0.00037,<br>4: 0.00016,                                        | AZOBR_50003 |                                                                |                                        |
| AZOLI_1308 | 1: 0.00537, 2: 0.00535,<br>3: 0.00139, 4: 0.00384,                | 1: 0.00129, 2: 0.00117,<br>3: 0.00106, 4: 0.00110,                            | AZOBR_50007 |                                                                | 3: 0.00014,                            |
| AZOLI_1310 | 1: 0.00050, 2: 0.00029,<br>4: 0.00012,                            | 2: 0.00021, 4: 0.00012,                                                       | AZOBR_50008 |                                                                |                                        |
| AZOLI_1312 | 1: 0.00008, 4: 0.00007,                                           | 4: 0.00011,                                                                   | AZOBR_50012 |                                                                |                                        |
| AZOLI_1313 | 1: 0.00013, 2: 0.00009,<br>4: 0.00053,                            | 1: 0.00040, 2: 0.00077,<br>3: 0.00066, 4: 0.00064,                            | AZOBR_50013 |                                                                | 1: 0.00012, 2: 0.00018,<br>3: 0.00007, |
| AZOLI_1314 | 1: 0.00025, 4: 0.00027,<br>1: 0.00006, 2: 0.00019,<br>4: 0.00013, | 3: 0.00013, 4: 0.00011,<br>1: 0.00006, 2: 0.00004,<br>3: 0.00005, 4: 0.00005, | AZOBR_50017 | 2: 0.00019, 3: 0.00018, 4: 0.00010,                            | 1: 0.00027, 2: 0.00031,<br>3: 0.00057, |
| AZOLI_1316 | 1: 0.00073, 2: 0.00047,<br>3: 0.00088, 4: 0.00054,                | 1: 0.00032, 2: 0.00020,<br>3: 0.00028, 4: 0.00077,                            | AZOBR_50021 | 4: 0.00024,                                                    | 2: 0.00039,                            |
| AZOLI_1322 |                                                                   |                                                                               | AZOBR_50022 | 1: 0.00068, 3: 0.00043, 4: 0.00046,<br>5: 0.00035,             |                                        |
| AZOLI_1323 | 1: 0.00021, 2: 0.00013,                                           |                                                                               | AZOBR_50027 | 4: 0.00059, 5: 0.00069,                                        | 1: 0.00055, 3: 0.00063,                |
| AZOLI_1329 | 1: 0.00040, 2: 0.00081,<br>3: 0.00258, 4: 0.00127,                | 1: 0.00179, 2: 0.00108,<br>3: 0.00190, 4: 0.00167,                            | AZOBR_50037 | 1: 0.00017, 5: 0.00008,                                        | 2: 0.00008,                            |
| AZOLI_1330 | 1: 0.00166, 2: 0.00199,<br>3: 0.00514, 4: 0.00155,                | 1: 0.00343, 2: 0.00305,<br>3: 0.00333, 4: 0.00305,                            | AZOBR_50054 | 4: 0.00008, 5: 0.00004,                                        | 3: 0.00003,                            |
| AZOLI_1331 | 1: 0.00078, 2: 0.00094,<br>3: 0.00256, 4: 0.00100,                | 1: 0.00131, 2: 0.00173,<br>3: 0.00154, 4: 0.00181,                            | AZOBR_60010 |                                                                | 2: 0.00008,                            |
| AZOLI_1332 | 2: 0.00023,                                                       | 2: 0.00022, 4: 0.00020,                                                       | AZOBR_70002 |                                                                |                                        |
| AZOLI_1333 | 1: 0.00270, 2: 0.00277,<br>3: 0.00620, 4: 0.00252,                | 1: 0.00400, 2: 0.00371,<br>3: 0.00426, 4: 0.00345,                            | AZOBR_70006 |                                                                | 1: 0.00031, 2: 0.00028,<br>3: 0.00041, |
| AZOLI_1335 | 1: 0.00043, 2: 0.00039,<br>3: 0.00075, 4: 0.00037,                | 1: 0.00061, 2: 0.00045,<br>3: 0.00061, 4: 0.00046,                            | AZOBR_70008 |                                                                | 3: 0.00003,                            |
| AZOLI_1337 | 1: 0.00036, 4: 0.00142,                                           |                                                                               | AZOBR_70010 | 1: 0.00054, 2: 0.00023, 3: 0.00038,<br>4: 0.00022, 5: 0.00031, | 1: 0.00047, 2: 0.00054,<br>3: 0.00064, |
| AZOLI_1338 | 1: 0.00047, 2: 0.00062,<br>4: 0.00029,                            | 1: 0.00062, 2: 0.00093,<br>3: 0.00051, 4: 0.00047,                            | AZOBR_70011 | 1: 0.00016, 3: 0.00008, 4: 0.00015,<br>5: 0.00006,             | 1: 0.00014, 2: 0.00014,<br>3: 0.00015, |
| AZOLI_1339 | 2: 0.00009, 3: 0.00008,                                           | 1: 0.00006, 2: 0.00011,                                                       | AZOBR_70012 | 2: 0.00051, 4: 0.00025,                                        | 3: 0.00009,                            |
| AZOLI_1342 | 1: 0.00026, 2: 0.00006,<br>3: 0.00012, 4: 0.00012,                | 1: 0.00009, 2: 0.00019,<br>4: 0.00015,                                        | AZOBR_70014 | 3: 0.00006, 4: 0.00007, 5: 0.00003,                            | 1: 0.00002, 3: 0.00009,                |
| AZOLI_1343 |                                                                   | 1: 0.00007, 2: 0.00014,<br>3: 0.00005, 4: 0.00006,                            | AZOBR_70015 | 1: 0.00025, 2: 0.00045, 3: 0.00032,<br>4: 0.00017, 5: 0.00013, | 1: 0.00012, 2: 0.00028,<br>3: 0.00012, |
| AZOLI_1344 |                                                                   | 3: 0.00006, 4: 0.00004,                                                       | AZOBR_70017 | 4: 0.00019,                                                    | 1: 0.00009, 3: 0.00006,                |
| AZOLI_1345 | 2: 0.00007, 3: 0.00021,<br>4: 0.00015,                            | 1: 0.00022, 2: 0.00028,<br>3: 0.00044, 4: 0.00036,                            | AZOBR_70019 | 1: 0.00029, 2: 0.00017, 3: 0.00025,                            | 2: 0.00014, 3: 0.00024,                |
| AZOLI_1346 |                                                                   | 1: 0.00026, 4: 0.00022,                                                       | AZOBR_70024 |                                                                |                                        |
| AZOLI_1348 |                                                                   | 4: 0.00008,                                                                   | AZOBR_70025 |                                                                | 1: 0.00054, 2: 0.00151,<br>3: 0.00053, |
| AZOLI_1349 | 1: 0.00234, 2: 0.00209,<br>3: 0.00058, 4: 0.00178,                | 1: 0.00238, 2: 0.00216,<br>3: 0.00178, 4: 0.00072,                            | AZOBR_70028 | 1: 0.00008, 2: 0.00009, 3: 0.00009,<br>4: 0.00011, 5: 0.00010, |                                        |
| AZOLI_1350 | 3: 0.00012,                                                       | 1: 0.00008, 2: 0.00022,<br>3: 0.00006, 4: 0.00007,                            | AZOBR_70031 |                                                                |                                        |
| AZOLI_1351 |                                                                   | 3: 0.00024,                                                                   | AZOBR_70032 | 1: 0.00075, 2: 0.00078, 3: 0.00068,<br>4: 0.00084, 5: 0.00095, | 1: 0.00181, 2: 0.00148,<br>3: 0.00125, |
| AZOLI_1352 | 4: 0.00010,                                                       | 3: 0.00030,                                                                   | AZOBR_70033 | 1: 0.00037, 2: 0.00025, 3: 0.00032,<br>5: 0.00026,             | 1: 0.00048, 3: 0.00058,                |
| AZOLI_1353 | 1: 0.00017, 2: 0.00008,<br>3: 0.00024,                            | 1: 0.00025, 2: 0.00020,<br>3: 0.00013, 4: 0.00014,                            | AZOBR_70034 |                                                                |                                        |
| AZOLI_1355 |                                                                   | 2: 0.00028, 3: 0.00013,<br>4: 0.00011,                                        | AZOBR_70037 |                                                                |                                        |
| AZOLI_1356 | 1: 0.00123, 2: 0.00088,<br>3: 0.00081, 4: 0.00090,                | 1: 0.00084, 2: 0.00074,<br>3: 0.00097, 4: 0.00066,                            | AZOBR_70039 | 1: 0.00021, 2: 0.00018, 3: 0.00019,<br>4: 0.00021, 5: 0.00012, | 1: 0.00010, 2: 0.00027,<br>3: 0.00020, |
| AZOLI_1358 |                                                                   | 4: 0.00008,                                                                   | AZOBR_70040 |                                                                |                                        |
| AZOLI_1362 | 1: 0.00018, 2: 0.00025,<br>3: 0.00014, 4: 0.00018,                | 1: 0.00017, 2: 0.00016,<br>3: 0.00020, 4: 0.00011,                            | AZOBR_70041 | 1: 0.00234, 2: 0.00406, 3: 0.00177,<br>4: 0.00248, 5: 0.00236, | 1: 0.00225, 2: 0.00098,<br>3: 0.00162, |
| AZOLI_1365 | 1: 0.00074, 2: 0.00082,<br>3: 0.00047, 4: 0.00081,                | 1: 0.00191, 2: 0.00112,<br>3: 0.00130, 4: 0.00087,                            | AZOBR_70042 | 1: 0.00530, 2: 0.00641, 3: 0.00354,<br>4: 0.00466, 5: 0.00489, | 1: 0.01003, 2: 0.00766,<br>3: 0.00933, |
| AZOLI_1371 | 1: 0.00002,                                                       |                                                                               | AZOBR_70043 | 5: 0.00009,                                                    |                                        |
| AZOLI_1372 | 4: 0.00006,                                                       |                                                                               | AZOBR_70045 | 4: 0.00006, 5: 0.00011,                                        |                                        |
| AZOLI_1375 | 1: 0.00018, 2: 0.00018,<br>4: 0.00016,                            | 1: 0.00024, 2: 0.00035,<br>3: 0.00045, 4: 0.00026,                            | AZOBR_70046 | 1: 0.00178, 2: 0.00184, 3: 0.00182,<br>4: 0.00201, 5: 0.00122, | 1: 0.00201, 2: 0.00198,<br>3: 0.00182, |
| AZOLI_1378 |                                                                   | 4: 0.00008,                                                                   | AZOBR_70049 | 3: 0.00012, 5: 0.00010,                                        | 3: 0.00017,                            |
| AZOLI_1380 | 1: 0.00003, 4: 0.00005,                                           | 1: 0.00016, 2: 0.00019,<br>3: 0.00010, 4: 0.00019,                            | AZOBR_70050 | 1: 0.00018,                                                    | 3: 0.00011,                            |
| AZOLI_1381 | 1: 0.00026,                                                       |                                                                               | AZOBR_70054 | 1: 0.00003, 2: 0.00008, 3: 0.00013,<br>4: 0.00005, 5: 0.00003, | 1: 0.00054, 2: 0.00060,<br>3: 0.00062, |
| AZOLI_1383 | 1: 0.00004, 4: 0.00004,                                           | 1: 0.00005,                                                                   | AZOBR_70055 | 4: 0.00056, 5: 0.00046,                                        | 1: 0.00183, 2: 0.00166,<br>3: 0.00191, |
| AZOLI_1385 | 2: 0.00010,                                                       | 2: 0.00005, 3: 0.00005,                                                       | AZOBR_70056 |                                                                |                                        |
| AZOLI_1386 | 1: 0.00016, 4: 0.00010,                                           |                                                                               | AZOBR_70057 |                                                                | 3: 0.00008,                            |
| AZOLI_1390 | 1: 0.01102, 2: 0.00690,<br>3: 0.00081, 4: 0.00381,                | 1: 0.00047, 2: 0.00062,<br>3: 0.00068, 4: 0.00045,                            | AZOBR_70058 |                                                                | 1: 0.00072, 2: 0.00025,<br>3: 0.00056, |
| AZOLI_1394 | 1: 0.00007,                                                       | 4: 0.00015,                                                                   | AZOBR_70063 | 3: 0.00004,                                                    | 2: 0.00003,                            |
| AZOLI_1395 | 2: 0.00006, 4: 0.00007,                                           |                                                                               | AZOBR_70064 | 2: 0.00014, 3: 0.00023, 5: 0.00015,                            | 2: 0.00016,                            |
| AZOLI_1396 | 1: 0.00040, 2: 0.00048,<br>4: 0.00061,                            | 1: 0.00048, 2: 0.00031,                                                       | AZOBR_70065 | 1: 0.00055, 2: 0.00048, 3: 0.00078,<br>4: 0.00119, 5: 0.00057, | 1: 0.00140, 2: 0.00073,<br>3: 0.00096, |
| AZOLI_1397 | 1: 0.00019, 2: 0.00011,                                           |                                                                               | AZOBR_70066 | 1: 0.00060, 2: 0.00059, 3: 0.00023,<br>4: 0.00074, 5: 0.00065, | 1: 0.00258, 2: 0.00303,<br>3: 0.00155, |
| AZOLI_1398 | 4: 0.00007,                                                       |                                                                               | AZOBR_70073 |                                                                | 2: 0.00004, 3: 0.00004,                |
| AZOLI_1400 | 1: 0.00044, 2: 0.00035,<br>4: 0.00060,                            | 2: 0.00013, 3: 0.00019,<br>4: 0.00011,                                        | AZOBR_70077 | 1: 0.00046, 2: 0.00020, 3: 0.00020,<br>4: 0.00036, 5: 0.00028, | 1: 0.00011, 2: 0.00017,<br>3: 0.00029, |

|            |                                                                   |                                                    |             |                                                                |                                        |
|------------|-------------------------------------------------------------------|----------------------------------------------------|-------------|----------------------------------------------------------------|----------------------------------------|
| AZOLI_1401 | 1: 0.00045, 2: 0.00081,<br>4: 0.00078,                            | 1: 0.00046, 2: 0.00047,<br>3: 0.00034, 4: 0.00044, | AZOBR_70078 | 1: 0.00048, 2: 0.00061, 3: 0.00041,<br>4: 0.00052, 5: 0.00041, | 1: 0.00027, 2: 0.00016,<br>3: 0.00020, |
| AZOLI_1403 | 4: 0.00009,                                                       |                                                    | AZOBR_70079 | 1: 0.00078, 2: 0.00137, 3: 0.00038,<br>4: 0.00160, 5: 0.00206, | 1: 0.00121, 2: 0.00073,<br>3: 0.00172, |
| AZOLI_1408 | 1: 0.00041, 2: 0.00062,                                           | 3: 0.00033,                                        | AZOBR_70080 |                                                                |                                        |
| AZOLI_1409 | 1: 0.00825, 2: 0.00745,<br>3: 0.01560, 4: 0.00725,                | 1: 0.00685, 2: 0.00698,<br>3: 0.00590, 4: 0.00753, | AZOBR_70081 | 3: 0.00013,                                                    | 1: 0.00010,                            |
| AZOLI_1411 | 1: 0.00010,                                                       | 4: 0.00009,                                        | AZOBR_70082 |                                                                |                                        |
| AZOLI_1412 | 1: 0.00091, 2: 0.00057,<br>3: 0.00030, 4: 0.00067,                | 1: 0.00121, 2: 0.00048,<br>3: 0.00106, 4: 0.00079, | AZOBR_70083 |                                                                | 1: 0.00009,                            |
| AZOLI_1413 | 1: 0.00041, 2: 0.00029,<br>4: 0.00036,                            | 1: 0.00013, 2: 0.00048,<br>3: 0.00018, 4: 0.00029, | AZOBR_70085 |                                                                |                                        |
| AZOLI_1414 | 1: 0.00020,                                                       |                                                    | AZOBR_70086 |                                                                | 1: 0.00008, 3: 0.00019,                |
| AZOLI_1415 | 1: 0.00036, 2: 0.00036,<br>3: 0.00076, 4: 0.00139,                | 1: 0.00091, 2: 0.00140,<br>3: 0.00106, 4: 0.00116, | AZOBR_70088 |                                                                |                                        |
| AZOLI_1416 | 1: 0.00005,                                                       |                                                    | AZOBR_70089 |                                                                | 2: 0.00005,                            |
| AZOLI_1421 | 1: 0.00055, 2: 0.00039,<br>4: 0.00029,                            | 1: 0.00034, 2: 0.00049,<br>3: 0.00042, 4: 0.00043, | AZOBR_70090 |                                                                | 1: 0.00035, 3: 0.00020,                |
| AZOLI_1423 |                                                                   | 2: 0.00010, 3: 0.00011,<br>4: 0.00026,             | AZOBR_70092 |                                                                | 2: 0.00006,                            |
| AZOLI_1428 | 1: 0.00056, 2: 0.00041,<br>4: 0.00029,                            | 1: 0.00047, 2: 0.00058,<br>3: 0.00033, 4: 0.00021, | AZOBR_70095 |                                                                | 1: 0.00006,                            |
| AZOLI_1430 | 1: 0.00057, 2: 0.00057,<br>4: 0.00049,                            | 2: 0.00092, 3: 0.00162,<br>4: 0.00049,             | AZOBR_70096 | 1: 0.00016, 2: 0.00016, 3: 0.00014,<br>4: 0.00022, 5: 0.00013, | 1: 0.00003, 2: 0.00012,<br>3: 0.00012, |
| AZOLI_1432 | 1: 0.00111, 2: 0.00131,<br>3: 0.00052, 4: 0.00053,                | 1: 0.00075, 2: 0.00060,<br>3: 0.00066, 4: 0.00032, | AZOBR_70098 | 1: 0.00064, 2: 0.00032, 3: 0.00043,<br>4: 0.00069, 5: 0.00044, | 1: 0.00037, 2: 0.00099,<br>3: 0.00071, |
| AZOLI_1433 | 1: 0.00009, 2: 0.00015,<br>4: 0.00018,                            | 1: 0.00009, 2: 0.00018,<br>3: 0.00013, 4: 0.00021, | AZOBR_70099 | 4: 0.00012, 5: 0.00008,                                        | 1: 0.00012,                            |
| AZOLI_1438 | 4: 0.00027,                                                       |                                                    | AZOBR_70100 |                                                                |                                        |
| AZOLI_1439 | 1: 0.00027, 2: 0.00022,<br>4: 0.00021,                            | 1: 0.00010, 2: 0.00007,<br>3: 0.00013, 4: 0.00015, | AZOBR_70102 |                                                                | 1: 0.00013, 2: 0.00003,<br>3: 0.00008, |
| AZOLI_1442 | 2: 0.00021, 4: 0.00036,<br>1: 0.00010, 2: 0.00006,<br>4: 0.00011, | 1: 0.00021, 2: 0.00013,<br>3: 0.00015, 4: 0.00018, | AZOBR_70104 |                                                                | 1: 0.00038, 2: 0.00043,<br>3: 0.00018, |
| AZOLI_1443 |                                                                   | 1: 0.00010, 4: 0.00008,                            | AZOBR_70105 |                                                                | 3: 0.00084,                            |
| AZOLI_1444 | 4: 0.00007,                                                       | 2: 0.00005,                                        | AZOBR_70106 |                                                                | 1: 0.00037, 2: 0.00051,<br>3: 0.00052, |
| AZOLI_1447 |                                                                   | 1: 0.00002, 2: 0.00002,<br>4: 0.00006,             | AZOBR_70107 |                                                                | 1: 0.00010, 2: 0.00018,<br>3: 0.00015, |
| AZOLI_1461 | 1: 0.00024, 2: 0.00034,<br>4: 0.00029,                            | 1: 0.00010, 2: 0.00019,<br>3: 0.00028, 4: 0.00025, | AZOBR_70108 |                                                                | 1: 0.00128, 2: 0.00086,<br>3: 0.00134, |
| AZOLI_1463 | 1: 0.00024, 4: 0.00062,                                           | 3: 0.00038, 4: 0.00021,                            | AZOBR_70109 |                                                                |                                        |
| AZOLI_1464 | 1: 0.00051, 2: 0.00032,<br>4: 0.00038,                            | 1: 0.00071, 2: 0.00074,<br>3: 0.00095, 4: 0.00060, | AZOBR_70112 |                                                                | 1: 0.00039, 2: 0.00011,<br>3: 0.00034, |
| AZOLI_1475 | 4: 0.00004,                                                       |                                                    | AZOBR_70113 |                                                                | 1: 0.00165, 2: 0.00180,<br>3: 0.00157, |
| AZOLI_1478 | 1: 0.00038, 2: 0.00045,<br>3: 0.00044, 4: 0.00068,                | 1: 0.00042, 2: 0.00052,<br>3: 0.00037, 4: 0.00027, | AZOBR_70117 |                                                                | 1: 0.00086, 2: 0.00033,<br>3: 0.00047, |
| AZOLI_1484 | 2: 0.00025,                                                       |                                                    | AZOBR_70118 |                                                                | 1: 0.00287, 2: 0.00342,<br>3: 0.00186, |
| AZOLI_1487 | 1: 0.00017, 2: 0.00026,                                           |                                                    | AZOBR_70119 |                                                                | 1: 0.00036, 3: 0.00023,                |
| AZOLI_1491 | 1: 0.00037, 2: 0.00088,<br>4: 0.00065,                            | 1: 0.00013,                                        | AZOBR_70120 |                                                                | 1: 0.00048, 2: 0.00068,<br>3: 0.00069, |
| AZOLI_1492 | 1: 0.00002, 2: 0.00002,<br>4: 0.00002,                            | 2: 0.00002, 3: 0.00002,<br>4: 0.00005,             | AZOBR_70121 |                                                                |                                        |
| AZOLI_1495 | 1: 0.00029, 2: 0.00039,<br>4: 0.00062,                            | 1: 0.00049, 2: 0.00033,<br>3: 0.00052, 4: 0.00046, | AZOBR_70122 |                                                                | 3: 0.00006,                            |
| AZOLI_1497 |                                                                   | 2: 0.00007,                                        | AZOBR_70123 | 1: 0.00006, 4: 0.00012, 5: 0.00010,                            |                                        |
| AZOLI_1504 | 1: 0.00074, 2: 0.00026,<br>4: 0.00015,                            |                                                    | AZOBR_70126 |                                                                | 1: 0.00116, 2: 0.00112,<br>3: 0.00118, |
| AZOLI_1505 | 1: 0.00008, 2: 0.00009,                                           |                                                    | AZOBR_70127 |                                                                | 1: 0.00031, 2: 0.00071,<br>3: 0.00058, |
| AZOLI_1507 | 1: 0.00018, 2: 0.00028,<br>4: 0.00047,                            | 1: 0.00014, 2: 0.00040,<br>3: 0.00024, 4: 0.00020, | AZOBR_70128 |                                                                | 1: 0.00959, 2: 0.01108,<br>3: 0.00456, |
| AZOLI_1508 |                                                                   | 3: 0.00010, 4: 0.00005,                            | AZOBR_70134 |                                                                | 1: 0.00046, 3: 0.00044,                |
| AZOLI_1509 | 1: 0.00259, 2: 0.00317,<br>3: 0.00277, 4: 0.00142,                | 1: 0.00343, 2: 0.00215,<br>3: 0.00236, 4: 0.00251, | AZOBR_70136 | 4: 0.00019,                                                    |                                        |
| AZOLI_1510 | 2: 0.00019, 4: 0.00011,                                           | 1: 0.00052, 2: 0.00044,<br>3: 0.00014, 4: 0.00033, | AZOBR_70137 |                                                                | 1: 0.00038, 2: 0.00036,<br>3: 0.00022, |
| AZOLI_1511 | 4: 0.00009,                                                       | 2: 0.00013, 3: 0.00018,<br>4: 0.00011,             | AZOBR_70138 |                                                                |                                        |
| AZOLI_1512 | 1: 0.00040, 2: 0.00052,<br>3: 0.00016, 4: 0.00092,                | 1: 0.00052, 2: 0.00057,<br>3: 0.00057, 4: 0.00040, | AZOBR_70140 | 3: 0.00054, 4: 0.00029,                                        | 1: 0.00216, 2: 0.00214,<br>3: 0.00209, |
| AZOLI_1516 | 1: 0.00004, 2: 0.00004,<br>4: 0.00006,                            | 1: 0.00009, 2: 0.00017,<br>3: 0.00007, 4: 0.00013, | AZOBR_70142 |                                                                | 1: 0.00090, 2: 0.00185,<br>3: 0.00079, |
| AZOLI_1521 | 4: 0.00005,                                                       |                                                    | AZOBR_70144 |                                                                | 2: 0.00008,                            |
| AZOLI_1527 | 2: 0.00061, 4: 0.00052,                                           | 3: 0.00049,                                        | AZOBR_70146 |                                                                | 1: 0.00030, 3: 0.00158,                |
| AZOLI_1534 | 1: 0.00001, 4: 0.00002,                                           | 4: 0.00002,                                        | AZOBR_70147 |                                                                |                                        |
| AZOLI_1538 | 4: 0.00007,                                                       | 2: 0.00010,                                        | AZOBR_70149 |                                                                | 1: 0.00056, 2: 0.00030,<br>3: 0.00075, |
| AZOLI_1540 | 1: 0.00032, 2: 0.00022,                                           | 2: 0.00021, 3: 0.00023,                            | AZOBR_70150 |                                                                |                                        |
| AZOLI_1545 | 1: 0.00221, 2: 0.00158,<br>3: 0.00273, 4: 0.00167,                | 1: 0.00141, 2: 0.00149,<br>3: 0.00124, 4: 0.00141, | AZOBR_70155 |                                                                |                                        |
| AZOLI_1546 | 1: 0.00023, 2: 0.00029,<br>3: 0.00026, 4: 0.00045,                | 1: 0.00050, 2: 0.00041,<br>3: 0.00050, 4: 0.00036, | AZOBR_70159 | 4: 0.00006,                                                    | 2: 0.00013, 3: 0.00011,                |
| AZOLI_1547 | 1: 0.00027, 2: 0.00024,<br>3: 0.00045, 4: 0.00021,                | 1: 0.00049, 2: 0.00026,<br>3: 0.00029, 4: 0.00023, | AZOBR_70161 | 1: 0.00389, 2: 0.00156, 3: 0.00422,<br>4: 0.00317, 5: 0.00244, | 1: 0.00249, 2: 0.00180,<br>3: 0.00242, |
| AZOLI_1548 | 2: 0.00003, 3: 0.00014,<br>4: 0.00007,                            |                                                    | AZOBR_70169 |                                                                | 1: 0.00012, 2: 0.00018,<br>3: 0.00015, |
| AZOLI_1549 |                                                                   | 4: 0.00021,                                        | AZOBR_70172 | 5: 0.00004,                                                    | 3: 0.00006,                            |

|            |                                                                   |                                                                               |              |                                                                                                       |                                                                   |
|------------|-------------------------------------------------------------------|-------------------------------------------------------------------------------|--------------|-------------------------------------------------------------------------------------------------------|-------------------------------------------------------------------|
| AZOLI_1552 | 4: 0.00031,                                                       | 1: 0.00042, 2: 0.00023,<br>3: 0.00045, 4: 0.00036,                            | AZOBR_70173  | 1: 0.00022, 2: 0.00016, 3: 0.00027,<br>4: 0.00015, 5: 0.00015,                                        | 1: 0.00026, 2: 0.00043,<br>3: 0.00017,                            |
| AZOLI_1554 | 1: 0.00004, 4: 0.00005,                                           | 3: 0.00004, 4: 0.00003,                                                       | AZOBR_70174  | 4: 0.00009, 5: 0.00009,                                                                               | 1: 0.00025, 3: 0.00037,                                           |
| AZOLI_1557 |                                                                   | 1: 0.00034, 2: 0.00039,<br>3: 0.00065, 4: 0.00058,                            | AZOBR_70176  | 1: 0.00052, 2: 0.00023, 3: 0.00059,<br>4: 0.00096, 5: 0.00054,                                        | 1: 0.00033, 2: 0.00038,<br>3: 0.00032,                            |
| AZOLI_1558 | 1: 0.00003,                                                       |                                                                               | AZOBR_70177  |                                                                                                       |                                                                   |
| AZOLI_1559 | 1: 0.00005, 2: 0.00012,<br>4: 0.00015,                            | 1: 0.00007, 2: 0.00004,<br>3: 0.00004, 4: 0.00006,                            | AZOBR_70179  |                                                                                                       |                                                                   |
| AZOLI_1560 | 1: 0.00015, 2: 0.00015,<br>3: 0.00108, 4: 0.00018,                | 1: 0.00047, 2: 0.00025,<br>3: 0.00016, 4: 0.00026,                            | AZOBR_70181  | 1: 0.00028, 2: 0.00012, 3: 0.00036,<br>4: 0.00031, 5: 0.00010,                                        | 1: 0.00004, 2: 0.00015,<br>3: 0.00009,                            |
| AZOLI_1561 | 1: 0.00034, 2: 0.00012,<br>3: 0.00075, 4: 0.00025,                | 1: 0.00022, 2: 0.00033,<br>3: 0.00018, 4: 0.00013,                            | AZOBR_70182  |                                                                                                       |                                                                   |
| AZOLI_1562 | 4: 0.00027,                                                       |                                                                               | AZOBR_70185  | 1: 0.00018, 2: 0.00016,                                                                               |                                                                   |
| AZOLI_1563 | 1: 0.00140, 2: 0.00152,<br>3: 0.00190, 4: 0.00067,                | 1: 0.00147, 2: 0.00132,<br>3: 0.00117, 4: 0.00157,                            | AZOBR_70186  |                                                                                                       |                                                                   |
| AZOLI_1571 | 4: 0.00010,                                                       |                                                                               | AZOBR_70187  | 5: 0.00009,                                                                                           | 3: 0.00012,                                                       |
| AZOLI_1572 | 1: 0.00037, 2: 0.00038,<br>3: 0.00043, 4: 0.00026,                | 1: 0.00034, 2: 0.00027,<br>3: 0.00029, 4: 0.00021,                            | AZOBR_70188  | 4: 0.00014, 5: 0.00014,                                                                               |                                                                   |
| AZOLI_1573 | 2: 0.00015, 4: 0.00025,                                           |                                                                               | AZOBR_70189  | 4: 0.00009,                                                                                           |                                                                   |
| AZOLI_1574 | 1: 0.00045, 2: 0.00057,<br>4: 0.00062,                            | 1: 0.00015, 2: 0.00007,<br>4: 0.00026,                                        | AZOBR_70190  | 1: 0.00034, 2: 0.00020, 3: 0.00039,<br>5: 0.00016,                                                    |                                                                   |
| AZOLI_1576 | 2: 0.00017,                                                       |                                                                               | AZOBR_70193  | 4: 0.00032,                                                                                           | 1: 0.00059, 2: 0.00135,<br>3: 0.00029,                            |
| AZOLI_1579 | 1: 0.00009,                                                       |                                                                               | AZOBR_80014  |                                                                                                       | 1: 0.00007, 2: 0.00008,<br>3: 0.00007,                            |
| AZOLI_1580 | 1: 0.00013, 4: 0.00007,                                           | 1: 0.00009, 2: 0.00013,<br>3: 0.00014, 4: 0.00037,                            | AZOBR_90006  |                                                                                                       | 1: 0.00014,                                                       |
| AZOLI_1583 | 1: 0.00370, 2: 0.00236,<br>3: 0.00075, 4: 0.00285,                | 1: 0.00413, 2: 0.00414,<br>3: 0.00383, 4: 0.00424,                            | AZOBR_90008  |                                                                                                       | 2: 0.00015,                                                       |
| AZOLI_1584 | 1: 0.00009, 4: 0.00007,                                           |                                                                               | AZOBR_90012  |                                                                                                       | 1: 0.00006, 3: 0.00010,                                           |
| AZOLI_1585 | 1: 0.00024, 2: 0.00048,<br>4: 0.00061,                            | 1: 0.00016,                                                                   | AZOBR_90018  |                                                                                                       | 2: 0.00017, 3: 0.00008,                                           |
| AZOLI_1596 | 1: 0.00007, 2: 0.00009,<br>3: 0.00016, 4: 0.00004,                | 2: 0.00007, 3: 0.00020,<br>4: 0.00016,                                        | AZOBR_90020  |                                                                                                       | 1: 0.00095, 2: 0.00104,<br>3: 0.00096,                            |
| AZOLI_1597 | 4: 0.00005,                                                       |                                                                               | AZOBR_100001 |                                                                                                       | 1: 0.00062, 2: 0.00099,<br>3: 0.00036,                            |
| AZOLI_1599 | 1: 0.00024, 2: 0.00036,                                           |                                                                               | AZOBR_100004 |                                                                                                       |                                                                   |
| AZOLI_1603 | 1: 0.00070, 2: 0.00035,<br>3: 0.00061, 4: 0.00023,                | 2: 0.00017, 4: 0.00023,                                                       | AZOBR_100006 | 3: 0.00038,                                                                                           |                                                                   |
| AZOLI_1605 | 1: 0.00177, 2: 0.00096,<br>3: 0.00218, 4: 0.00145,                | 1: 0.00175, 2: 0.00138,<br>3: 0.00161, 4: 0.00236,                            | AZOBR_100009 |                                                                                                       | 2: 0.00007,                                                       |
| AZOLI_1606 | 1: 0.00110, 2: 0.00078,<br>3: 0.00166, 4: 0.00063,                | 1: 0.00175, 2: 0.00126,<br>3: 0.00138, 4: 0.00143,                            | AZOBR_100010 |                                                                                                       | 3: 0.00027,                                                       |
| AZOLI_1608 | 3: 0.00011, 4: 0.00017,                                           |                                                                               | AZOBR_100012 |                                                                                                       | 1: 0.00032, 3: 0.00062,                                           |
| AZOLI_1613 | 1: 0.00146, 2: 0.00162,<br>3: 0.00012, 4: 0.00078,                | 1: 0.00051, 2: 0.00036,<br>3: 0.00021, 4: 0.00056,                            | AZOBR_100014 | 2: 0.00011, 4: 0.00014, 5: 0.00006,<br>1: 0.00076, 2: 0.00059, 3: 0.00064,<br>4: 0.00040, 5: 0.00046, | 1: 0.00010,<br>2: 0.00079, 3: 0.00037,<br>3: 0.00041,             |
| AZOLI_1614 | 4: 0.00011,                                                       |                                                                               | AZOBR_100015 |                                                                                                       |                                                                   |
| AZOLI_1616 |                                                                   | 4: 0.00014,                                                                   | AZOBR_100016 | 3: 0.00075, 4: 0.00106, 5: 0.00046,                                                                   |                                                                   |
| AZOLI_1623 | 1: 0.00031, 2: 0.00021,<br>1: 0.00012, 2: 0.00037,<br>4: 0.00007, |                                                                               | AZOBR_100017 | 1: 0.00008, 2: 0.00007, 3: 0.00007,<br>4: 0.00011,                                                    | 1: 0.00009, 2: 0.00009,<br>3: 0.00012,                            |
| AZOLI_1625 | 1: 0.00085, 2: 0.00171,<br>4: 0.00110,                            | 4: 0.00010,                                                                   | AZOBR_100018 |                                                                                                       |                                                                   |
| AZOLI_1626 | 1: 0.00041, 2: 0.00062,<br>3: 0.00078, 4: 0.00098,                | 1: 0.00057, 2: 0.00041,<br>1: 0.00069, 2: 0.00056,<br>3: 0.00064, 4: 0.00061, | AZOBR_100021 | 4: 0.00003,                                                                                           |                                                                   |
| AZOLI_1627 |                                                                   |                                                                               | AZOBR_100023 | 4: 0.00022,                                                                                           | 3: 0.00008,                                                       |
| AZOLI_1628 |                                                                   | 4: 0.00016,                                                                   | AZOBR_100025 | 2: 0.00031, 3: 0.00024, 4: 0.00024,<br>5: 0.00044,                                                    | 1: 0.00104, 2: 0.00113,<br>3: 0.00106,                            |
| AZOLI_1629 | 2: 0.00010, 4: 0.00024,                                           |                                                                               | AZOBR_100027 | 1: 0.00065, 2: 0.00042, 3: 0.00037,<br>4: 0.00051, 5: 0.00060,                                        | 2: 0.00050, 3: 0.00011,<br>1: 0.00030, 2: 0.00034,<br>3: 0.00073, |
| AZOLI_1631 | 1: 0.00010, 2: 0.00016,<br>4: 0.00013,                            | 1: 0.00009, 2: 0.00005,<br>3: 0.00009, 4: 0.00013,                            | AZOBR_100028 |                                                                                                       | 3: 0.00003,                                                       |
| AZOLI_1632 | 1: 0.00069, 2: 0.00061,                                           |                                                                               | AZOBR_100032 |                                                                                                       |                                                                   |
| AZOLI_1634 | 1: 0.00081, 2: 0.00056,<br>3: 0.00018, 4: 0.00067,                | 1: 0.00145, 2: 0.00124,<br>3: 0.00161, 4: 0.00090,                            | AZOBR_100035 | 1: 0.00065, 2: 0.00104, 3: 0.00067,<br>4: 0.00072, 5: 0.00117,                                        | 1: 0.00101, 2: 0.00076,<br>3: 0.00065,                            |
| AZOLI_1636 | 4: 0.00007,                                                       | 2: 0.00008,                                                                   | AZOBR_100037 | 1: 0.00042, 4: 0.00022, 5: 0.00029,                                                                   | 1: 0.00020, 2: 0.00038,<br>3: 0.00030,                            |
| AZOLI_1639 |                                                                   | 2: 0.00012, 3: 0.00009,<br>4: 0.00015,                                        | AZOBR_100038 | 4: 0.00012, 5: 0.00019,                                                                               |                                                                   |
| AZOLI_1640 | 4: 0.00007,                                                       |                                                                               | AZOBR_100039 |                                                                                                       | 1: 0.00008, 2: 0.00010,<br>3: 0.00016,                            |
| AZOLI_1641 | 2: 0.00009,                                                       | 1: 0.00023, 2: 0.00039,<br>4: 0.00042,                                        | AZOBR_100040 |                                                                                                       | 3: 0.00004,                                                       |
| AZOLI_1643 |                                                                   | 4: 0.00015,                                                                   | AZOBR_100041 |                                                                                                       | 1: 0.00013, 2: 0.00026,<br>3: 0.00016,                            |
| AZOLI_1645 |                                                                   | 2: 0.00004,                                                                   | AZOBR_100047 | 1: 0.00087,                                                                                           | 1: 0.00074, 3: 0.00054,                                           |
| AZOLI_1660 | 1: 0.00002,                                                       |                                                                               | AZOBR_100048 | 1: 0.00015, 2: 0.00016, 3: 0.00012,<br>4: 0.00012, 5: 0.00010,                                        | 1: 0.00007, 3: 0.00007,                                           |
| AZOLI_1668 | 1: 0.00090, 2: 0.00057,<br>4: 0.00098,                            | 3: 0.00049, 4: 0.00029,                                                       | AZOBR_100049 | 4: 0.00009,                                                                                           |                                                                   |
| AZOLI_1669 | 2: 0.00007,                                                       | 3: 0.00007,                                                                   | AZOBR_100050 |                                                                                                       |                                                                   |
| AZOLI_1670 | 1: 0.00148, 2: 0.00130,<br>3: 0.00102, 4: 0.00144,                | 1: 0.00082, 2: 0.00076,<br>3: 0.00098, 4: 0.00088,                            | AZOBR_100054 | 1: 0.00087, 2: 0.00029, 3: 0.00046,<br>4: 0.00045, 5: 0.00053,                                        | 1: 0.00021, 2: 0.00016,<br>3: 0.00020,                            |
| AZOLI_1671 | 1: 0.00029, 2: 0.00043,<br>4: 0.00049,                            | 1: 0.00029, 3: 0.00061,<br>4: 0.00025,                                        | AZOBR_100055 | 2: 0.00004, 4: 0.00010,                                                                               | 3: 0.00003,                                                       |
| AZOLI_1673 | 1: 0.00083, 2: 0.00051,<br>3: 0.00124, 4: 0.00107,                | 1: 0.00052, 2: 0.00072,<br>3: 0.00094, 4: 0.00096,                            | AZOBR_100059 | 1: 0.00025, 2: 0.00004, 3: 0.00029,<br>4: 0.00009, 5: 0.00006,                                        | 1: 0.00015, 2: 0.00041,<br>3: 0.00024,                            |
| AZOLI_1674 | 1: 0.00014, 4: 0.00019,                                           | 2: 0.00011, 3: 0.00012,<br>4: 0.00012,                                        | AZOBR_100064 | 4: 0.00012,                                                                                           |                                                                   |

|            |                                                                   |                                                    |              |                                                                |                                        |
|------------|-------------------------------------------------------------------|----------------------------------------------------|--------------|----------------------------------------------------------------|----------------------------------------|
| AZOLI_1676 | 1: 0.00457, 2: 0.00274,<br>3: 0.00557, 4: 0.00314,                | 1: 0.00244, 2: 0.00288,<br>3: 0.00225, 4: 0.00301, | AZOBR_100070 |                                                                | 3: 0.00006,                            |
| AZOLI_1677 | 1: 0.00546, 2: 0.00577,<br>4: 0.00405,                            | 1: 0.00206, 2: 0.00310,<br>3: 0.00218, 4: 0.00209, | AZOBR_100071 |                                                                |                                        |
| AZOLI_1679 | 1: 0.00327, 2: 0.00311,<br>3: 0.00247, 4: 0.00313,                | 1: 0.00294, 2: 0.00419,<br>3: 0.00305, 4: 0.00235, | AZOBR_100075 |                                                                |                                        |
| AZOLI_1681 | 1: 0.00061, 2: 0.00053,<br>3: 0.00082, 4: 0.00072,                | 1: 0.00042, 2: 0.00043,<br>3: 0.00072, 4: 0.00091, | AZOBR_100079 | 1: 0.00089, 2: 0.00141, 3: 0.00121,<br>4: 0.00146, 5: 0.00147, | 1: 0.00034, 3: 0.00044,                |
| AZOLI_1682 | 3: 0.00101,                                                       | 1: 0.00127, 2: 0.00158,<br>3: 0.00183, 4: 0.00194, | AZOBR_100080 | 1: 0.00185, 2: 0.00176, 3: 0.00193,<br>4: 0.00213, 5: 0.00114, | 1: 0.00167, 2: 0.00189,<br>3: 0.00122, |
| AZOLI_1683 |                                                                   | 2: 0.00007,                                        | AZOBR_100082 |                                                                | 1: 0.00016, 2: 0.00018,<br>3: 0.00017, |
| AZOLI_1690 |                                                                   | 4: 0.00006,                                        | AZOBR_100083 |                                                                | 1: 0.00078, 2: 0.00078,<br>3: 0.00152, |
| AZOLI_1704 | 1: 0.00047, 2: 0.00071,<br>3: 0.00066, 4: 0.00041,                | 1: 0.00066, 2: 0.00017,<br>3: 0.00044, 4: 0.00036, | AZOBR_100084 | 1: 0.00021, 2: 0.00037, 3: 0.00041,<br>4: 0.00015, 5: 0.00015, | 1: 0.00010, 2: 0.00027,<br>3: 0.00013, |
| AZOLI_1713 | 4: 0.00004,                                                       | 1: 0.00010, 2: 0.00005,<br>3: 0.00005, 4: 0.00005, | AZOBR_100085 | 1: 0.00065, 2: 0.00172, 3: 0.00111,<br>4: 0.00283, 5: 0.00120, | 1: 0.00056, 3: 0.00094,                |
| AZOLI_1721 | 1: 0.00011, 4: 0.00007,                                           | 1: 0.00009, 2: 0.00020,<br>3: 0.00006, 4: 0.00015, | AZOBR_100087 | 5: 0.00011,                                                    | 3: 0.00025,                            |
| AZOLI_1722 | 1: 0.00010, 2: 0.00010,<br>4: 0.00021,                            | 4: 0.00009,                                        | AZOBR_100088 |                                                                | 3: 0.00012,                            |
| AZOLI_1723 | 3: 0.00038, 4: 0.00008,<br>1: 0.00009, 2: 0.00009,<br>4: 0.00009, | 1: 0.00006, 2: 0.00015,<br>4: 0.00010,             | AZOBR_100090 | 1: 0.00015, 3: 0.00013, 4: 0.00063,<br>5: 0.00058,             |                                        |
| AZOLI_1724 | 4: 0.00009,                                                       | 4: 0.00008,                                        | AZOBR_100091 | 1: 0.00014, 2: 0.00025, 3: 0.00008,<br>4: 0.00019, 5: 0.00019, | 1: 0.00009, 3: 0.00012,                |
| AZOLI_1725 | 4: 0.00011,                                                       |                                                    | AZOBR_100092 |                                                                |                                        |
| AZOLI_1727 |                                                                   | 1: 0.00025, 2: 0.00024,<br>3: 0.00027, 4: 0.00043, | AZOBR_100095 | 1: 0.00041, 2: 0.00111, 3: 0.00065,<br>4: 0.00078, 5: 0.00056, | 1: 0.00277, 2: 0.00158,<br>3: 0.00188, |
| AZOLI_1728 | 1: 0.00018, 4: 0.00015,                                           | 1: 0.00018,                                        | AZOBR_100097 |                                                                |                                        |
| AZOLI_1732 | 1: 0.00008, 2: 0.00022,<br>4: 0.00011,                            | 1: 0.00011, 2: 0.00013,<br>3: 0.00013, 4: 0.00007, | AZOBR_100099 | 1: 0.00033, 2: 0.00030, 3: 0.00025,<br>4: 0.00031, 5: 0.00015, | 1: 0.00043, 2: 0.00027,<br>3: 0.00037, |
| AZOLI_1733 | 1: 0.00007, 4: 0.00014,                                           |                                                    | AZOBR_100102 | 2: 0.00042, 4: 0.00054, 5: 0.00060,                            | 1: 0.00040, 2: 0.00080,<br>3: 0.00078, |
| AZOLI_1734 | 3: 0.00014, 4: 0.00009,                                           |                                                    | AZOBR_100103 | 1: 0.00018, 2: 0.00016, 3: 0.00024,<br>4: 0.00013, 5: 0.00035, | 1: 0.00018, 2: 0.00023,<br>3: 0.00026, |
| AZOLI_1748 | 1: 0.00030, 4: 0.00051,                                           |                                                    | AZOBR_100105 | 1: 0.00054, 2: 0.00068, 3: 0.00046,<br>4: 0.00075, 5: 0.00055, | 1: 0.00132, 2: 0.00125,<br>3: 0.00097, |
| AZOLI_1755 |                                                                   | 4: 0.00008,                                        | AZOBR_100106 | 1: 0.00024, 2: 0.00068, 3: 0.00061,<br>4: 0.00036, 5: 0.00053, | 1: 0.00012, 2: 0.00017,<br>3: 0.00006, |
| AZOLI_1792 | 2: 0.00067, 4: 0.00029,                                           | 2: 0.00054, 4: 0.00029,                            | AZOBR_100108 |                                                                | 3: 0.00008,                            |
| AZOLI_1798 | 1: 0.00041, 2: 0.00066,<br>3: 0.00046, 4: 0.00049,                | 1: 0.00066, 2: 0.00024,<br>3: 0.00044, 4: 0.00014, | AZOBR_100109 |                                                                | 1: 0.00005, 2: 0.00005,<br>3: 0.00007, |
| AZOLI_1799 | 1: 0.00016, 3: 0.00045,<br>4: 0.00048,                            | 1: 0.00016, 2: 0.00031,<br>3: 0.00078, 4: 0.00062, | AZOBR_100110 | 1: 0.00010, 2: 0.00017, 3: 0.00019,<br>4: 0.00017, 5: 0.00010, | 1: 0.00005, 2: 0.00007,<br>3: 0.00012, |
| AZOLI_1807 | 1: 0.00169, 2: 0.00140,<br>4: 0.00093,                            | 1: 0.00023, 2: 0.00023,<br>3: 0.00025, 4: 0.00033, | AZOBR_100111 | 1: 0.00078, 2: 0.00084, 3: 0.00066,<br>4: 0.00060, 5: 0.00042, | 1: 0.00033, 2: 0.00044,<br>3: 0.00059, |
| AZOLI_1808 | 1: 0.00006, 2: 0.00006,                                           | 1: 0.00016, 2: 0.00006,<br>3: 0.00017, 4: 0.00016, | AZOBR_100112 | 1: 0.00450, 2: 0.00329, 3: 0.00394,<br>4: 0.00313, 5: 0.00301, | 1: 0.00206, 2: 0.00200,<br>3: 0.00170, |
| AZOLI_1811 | 3: 0.00048,                                                       | 1: 0.00100, 2: 0.00063,<br>3: 0.00124, 4: 0.00107, | AZOBR_100113 | 2: 0.00011, 3: 0.00016, 4: 0.00034,<br>5: 0.00030,             | 1: 0.00020, 2: 0.00027,<br>3: 0.00023, |
| AZOLI_1812 | 4: 0.00004,                                                       | 2: 0.00004, 3: 0.00005,<br>4: 0.00010,             | AZOBR_100116 | 1: 0.00017, 3: 0.00018, 4: 0.00046,<br>5: 0.00014,             | 1: 0.00040, 2: 0.00046,<br>3: 0.00060, |
| AZOLI_1815 | 1: 0.00018, 2: 0.00017,<br>3: 0.00009, 4: 0.00027,                | 1: 0.00021, 2: 0.00012,<br>3: 0.00026, 4: 0.00017, | AZOBR_100120 |                                                                | 1: 0.00025, 2: 0.00011,<br>3: 0.00021, |
| AZOLI_1817 | 1: 0.00021, 2: 0.00013,<br>3: 0.00088, 4: 0.00022,                | 1: 0.00013, 2: 0.00020,<br>3: 0.00054, 4: 0.00018, | AZOBR_100124 | 1: 0.00017, 3: 0.00022, 4: 0.00036,<br>5: 0.00027,             | 1: 0.00073, 2: 0.00108,<br>3: 0.00079, |
| AZOLI_1818 | 2: 0.00026, 4: 0.00017,                                           | 1: 0.00027, 3: 0.00014,<br>4: 0.00017,             | AZOBR_100128 |                                                                |                                        |
| AZOLI_1819 | 1: 0.00042, 2: 0.00056,<br>3: 0.00048, 4: 0.00034,                | 1: 0.00083, 2: 0.00079,<br>3: 0.00065, 4: 0.00057, | AZOBR_100129 |                                                                |                                        |
| AZOLI_1823 |                                                                   | 1: 0.00050, 3: 0.00026,<br>4: 0.00021,             | AZOBR_100130 | 1: 0.00010,                                                    | 1: 0.00016, 2: 0.00007,<br>3: 0.00024, |
| AZOLI_1824 |                                                                   | 3: 0.00008,                                        | AZOBR_100131 | 4: 0.00018,                                                    | 3: 0.00008,                            |
| AZOLI_1833 | 4: 0.00004,                                                       | 1: 0.00005, 4: 0.00004,                            | AZOBR_100132 | 4: 0.00008,                                                    | 3: 0.00011,                            |
| AZOLI_1834 | 2: 0.00034, 4: 0.00022,                                           | 1: 0.00034, 2: 0.00041,<br>3: 0.00036,             | AZOBR_100136 | 1: 0.00030, 2: 0.00027, 3: 0.00042,<br>4: 0.00044, 5: 0.00076, | 1: 0.00041, 2: 0.00036,<br>3: 0.00075, |
| AZOLI_1836 | 1: 0.00037, 2: 0.00065,<br>3: 0.00010, 4: 0.00023,                | 1: 0.00024, 2: 0.00020,<br>3: 0.00007, 4: 0.00009, | AZOBR_100141 | 1: 0.00047, 2: 0.00035, 3: 0.00049,<br>4: 0.00045, 5: 0.00050, | 1: 0.00046, 2: 0.00040,<br>3: 0.00058, |
| AZOLI_1837 | 2: 0.00008, 4: 0.00014,                                           |                                                    | AZOBR_100142 | 5: 0.00004,                                                    |                                        |
| AZOLI_1838 | 1: 0.00060, 4: 0.00169,                                           | 2: 0.00177, 4: 0.00065,                            | AZOBR_100144 | 4: 0.00006,                                                    | 1: 0.00035, 2: 0.00040,<br>3: 0.00059, |
| AZOLI_1843 | 1: 0.01099, 2: 0.00868,<br>3: 0.00718, 4: 0.00646,                | 1: 0.00590, 2: 0.00591,<br>3: 0.00581, 4: 0.00578, | AZOBR_100145 |                                                                |                                        |
| AZOLI_1844 | 1: 0.00191, 2: 0.00260,<br>3: 0.00236, 4: 0.00176,                | 1: 0.00102, 2: 0.00108,<br>3: 0.00151, 4: 0.00171, | AZOBR_100149 |                                                                | 1: 0.00004, 3: 0.00002,                |
| AZOLI_1845 | 1: 0.00137, 2: 0.00199,<br>3: 0.00507, 4: 0.00362,                | 1: 0.00400, 2: 0.00259,<br>3: 0.00570, 4: 0.00348, | AZOBR_100150 |                                                                | 1: 0.00020,                            |
| AZOLI_1846 | 1: 0.00162, 2: 0.00143,<br>3: 0.00256, 4: 0.00257,                | 1: 0.00169, 2: 0.00173,<br>3: 0.00190, 4: 0.00131, | AZOBR_100154 | 2: 0.00035, 4: 0.00023, 5: 0.00032,                            | 1: 0.00017,                            |
| AZOLI_1846 | 1: 0.00248, 2: 0.00223,<br>3: 0.01865, 4: 0.00357,                | 1: 0.00756, 2: 0.00620,<br>4: 0.00072,             | AZOBR_100157 | 3: 0.00007, 5: 0.00009,                                        | 1: 0.00006, 3: 0.00005,                |
| AZOLI_1851 | 1: 0.00173, 2: 0.00231,<br>3: 0.00270, 4: 0.00248,                | 1: 0.00161, 2: 0.00170,<br>3: 0.00192, 4: 0.00204, | AZOBR_100162 |                                                                |                                        |
| AZOLI_1852 | 1: 0.00197, 2: 0.00050,<br>4: 0.00119,                            | 1: 0.00050, 2: 0.00086,<br>3: 0.00106, 4: 0.00076, | AZOBR_100163 | 1: 0.00019,                                                    | 2: 0.00023,                            |
| AZOLI_1853 | 4: 0.00012,                                                       |                                                    | AZOBR_100164 |                                                                | 3: 0.00005,                            |
| AZOLI_1856 | 1: 0.00591, 2: 0.00317,<br>3: 0.00177, 4: 0.00336,                | 1: 0.00255, 2: 0.00319,<br>3: 0.00216, 4: 0.00478, | AZOBR_100169 |                                                                |                                        |
| AZOLI_1857 | 1: 0.00052, 2: 0.00055,                                           | 1: 0.00050, 2: 0.00043,                            | AZOBR_100170 |                                                                | 3: 0.00010,                            |

|            |                                                    |                                                    |              |                                                                |                                        |
|------------|----------------------------------------------------|----------------------------------------------------|--------------|----------------------------------------------------------------|----------------------------------------|
|            | 3: 0.00050, 4: 0.00091,                            | 3: 0.00068, 4: 0.00050,                            |              |                                                                |                                        |
| AZOLI_1858 | 1: 0.00089, 2: 0.00073,<br>3: 0.00095, 4: 0.00058, | 1: 0.00087, 2: 0.00092,<br>3: 0.00069, 4: 0.00067, | AZOBR_100174 |                                                                |                                        |
| AZOLI_1860 | 1: 0.00104, 2: 0.00171,<br>3: 0.00062, 4: 0.00170, | 1: 0.00094, 2: 0.00117,<br>3: 0.00164, 4: 0.00090, | AZOBR_100175 | 4: 0.00006,                                                    | 1: 0.00006, 2: 0.00004,<br>3: 0.00009, |
| AZOLI_1861 | 1: 0.00412, 2: 0.00278,<br>3: 0.00474, 4: 0.00386, | 1: 0.00213, 2: 0.00203,<br>3: 0.00244, 4: 0.00293, | AZOBR_100176 | 1: 0.00333, 2: 0.00609, 3: 0.00618,<br>4: 0.00434, 5: 0.00230, | 1: 0.00343, 2: 0.00243,<br>3: 0.00296, |
| AZOLI_1863 |                                                    | 2: 0.00006, 4: 0.00006,                            | AZOBR_100177 | 1: 0.00220, 2: 0.00175, 3: 0.00187,<br>4: 0.00356, 5: 0.00364, | 1: 0.00373, 2: 0.00136,<br>3: 0.00308, |
| AZOLI_1864 | 4: 0.00004,                                        |                                                    | AZOBR_100178 | 1: 0.00411, 2: 0.00363, 3: 0.00328,<br>4: 0.00289, 5: 0.00304, | 1: 0.00214, 2: 0.00302,<br>3: 0.00216, |
| AZOLI_1865 | 1: 0.00131, 2: 0.00173,<br>3: 0.00327, 4: 0.00253, | 1: 0.00215, 2: 0.00207,<br>3: 0.00173, 4: 0.00297, | AZOBR_100179 | 1: 0.00840, 2: 0.00916, 3: 0.00856,<br>4: 0.00750, 5: 0.00715, | 1: 0.00531, 2: 0.00619,<br>3: 0.00445, |
| AZOLI_1867 | 1: 0.00070, 2: 0.00102,<br>3: 0.00048, 4: 0.00075, | 1: 0.00054, 2: 0.00082,<br>3: 0.00072, 4: 0.00065, | AZOBR_100187 | 1: 0.00039, 2: 0.00072, 3: 0.00091,<br>4: 0.00050, 5: 0.00044, | 1: 0.00055, 2: 0.00037,<br>3: 0.00029, |
| AZOLI_1872 | 1: 0.00028, 2: 0.00060,<br>3: 0.00065, 4: 0.00079, | 1: 0.00098, 2: 0.00092,<br>3: 0.00113, 4: 0.00083, | AZOBR_100190 | 3: 0.00011, 4: 0.00013,                                        | 2: 0.00009,                            |
| AZOLI_1873 | 1: 0.00131, 2: 0.00264,<br>3: 0.00117, 4: 0.00051, | 1: 0.00048, 2: 0.00093,<br>3: 0.00064, 4: 0.00072, | AZOBR_100191 | 1: 0.00031, 2: 0.00022, 3: 0.00021,<br>4: 0.00017,             | 1: 0.00008,                            |
| AZOLI_1876 | 1: 0.00085, 2: 0.00049,<br>4: 0.00156,             | 1: 0.00037, 2: 0.00030,<br>3: 0.00039, 4: 0.00068, | AZOBR_100192 |                                                                | 1: 0.00021,                            |
| AZOLI_1878 | 1: 0.00025, 2: 0.00011,<br>3: 0.00010, 4: 0.00028, | 1: 0.00011, 2: 0.00011,<br>3: 0.00019, 4: 0.00012, | AZOBR_100193 |                                                                |                                        |
| AZOLI_1881 | 2: 0.00021, 4: 0.00024,                            | 1: 0.00021, 2: 0.00020,<br>3: 0.00052, 4: 0.00036, | AZOBR_100195 | 2: 0.00013, 3: 0.00008, 4: 0.00010,<br>5: 0.00007,             | 2: 0.00007, 3: 0.00015,                |
| AZOLI_1883 | 1: 0.00020, 4: 0.00008,                            | 3: 0.00011, 4: 0.00008,                            | AZOBR_100197 | 3: 0.00037, 4: 0.00030,                                        |                                        |
| AZOLI_1884 | 1: 0.00012, 4: 0.00027,                            | 3: 0.00013,                                        | AZOBR_100198 | 4: 0.00004, 5: 0.00004,                                        |                                        |
| AZOLI_1885 | 1: 0.00051, 2: 0.00051,<br>4: 0.00233,             | 1: 0.00103, 3: 0.00181,<br>4: 0.00088,             | AZOBR_100201 | 1: 0.00156, 2: 0.00233, 3: 0.00245,<br>4: 0.00207, 5: 0.00204, | 1: 0.00220, 2: 0.00297,<br>3: 0.00201, |
| AZOLI_1886 | 2: 0.00014,                                        | 2: 0.00014, 3: 0.00015,<br>4: 0.00008,             | AZOBR_100202 |                                                                | 3: 0.00013,                            |
| AZOLI_1890 |                                                    | 1: 0.00136, 2: 0.00287,<br>3: 0.00220, 4: 0.00277, | AZOBR_100206 |                                                                |                                        |
| AZOLI_1894 | 1: 0.00012, 2: 0.00015,<br>3: 0.00102, 4: 0.00027, | 1: 0.00029, 2: 0.00031,<br>3: 0.00025, 4: 0.00020, | AZOBR_100207 |                                                                |                                        |
| AZOLI_1895 | 1: 0.00005, 2: 0.00010,<br>4: 0.00010,             | 1: 0.00026, 2: 0.00015,<br>3: 0.00011, 4: 0.00010, | AZOBR_100208 |                                                                | 3: 0.00003,                            |
| AZOLI_1901 | 2: 0.00031, 4: 0.00039,                            | 2: 0.00015, 3: 0.00024,<br>4: 0.00026,             | AZOBR_100209 |                                                                |                                        |
| AZOLI_1902 | 1: 0.00072, 2: 0.00080,<br>3: 0.00077, 4: 0.00066, | 1: 0.00088, 2: 0.00082,<br>3: 0.00106, 4: 0.00064, | AZOBR_100210 |                                                                |                                        |
| AZOLI_1902 | 1: 0.00031, 4: 0.00026,                            | 4: 0.00018,                                        | AZOBR_100214 |                                                                |                                        |
| AZOLI_1904 | 1: 0.00022, 2: 0.00029,<br>3: 0.00021, 4: 0.00023, | 1: 0.00015, 2: 0.00012,<br>3: 0.00013, 4: 0.00013, | AZOBR_100215 |                                                                | 2: 0.00008, 3: 0.00007,                |
| AZOLI_1909 | 3: 0.00006,                                        | 1: 0.00006, 2: 0.00006,                            | AZOBR_100216 | 1: 0.00010, 4: 0.00004,                                        |                                        |
| AZOLI_1912 | 1: 0.00051, 2: 0.00047,<br>4: 0.00032,             | 1: 0.00052, 2: 0.00032,<br>3: 0.00030, 4: 0.00024, | AZOBR_100217 | 5: 0.00007,                                                    | 1: 0.00010, 3: 0.00020,                |
| AZOLI_1913 | 4: 0.00008,                                        | 4: 0.00005,                                        | AZOBR_100219 |                                                                |                                        |
| AZOLI_1914 | 1: 0.00383, 2: 0.00368,<br>3: 0.00263, 4: 0.00274, | 1: 0.00540, 2: 0.00520,<br>3: 0.00472, 4: 0.00477, | AZOBR_100221 |                                                                |                                        |
| AZOLI_1915 | 4: 0.00010,                                        | 2: 0.00008, 4: 0.00004,                            | AZOBR_100224 |                                                                |                                        |
| AZOLI_1917 | 1: 0.00015, 3: 0.00022,<br>4: 0.00013,             | 1: 0.00012, 3: 0.00012,<br>4: 0.00007,             | AZOBR_100225 |                                                                |                                        |
| AZOLI_1931 | 4: 0.00004,                                        | 3: 0.00008,                                        | AZOBR_100228 | 1: 0.00108, 2: 0.00104, 3: 0.00103,<br>4: 0.00085, 5: 0.00100, | 1: 0.00077, 2: 0.00068,<br>3: 0.00071, |
| AZOLI_1941 | 2: 0.00024,                                        |                                                    | AZOBR_100230 | 1: 0.00117, 2: 0.00183, 3: 0.00077,<br>4: 0.00116, 5: 0.00054, | 1: 0.00257, 2: 0.00160,<br>3: 0.00346, |
| AZOLI_1946 | 2: 0.00012,                                        |                                                    | AZOBR_100233 |                                                                |                                        |
| AZOLI_1947 | 1: 0.00049, 2: 0.00042,<br>4: 0.00051,             | 1: 0.00042, 2: 0.00026,<br>3: 0.00018, 4: 0.00028, | AZOBR_100234 | 3: 0.00005, 4: 0.00004,                                        | 3: 0.00005,                            |
| AZOLI_1948 | 2: 0.00032,                                        |                                                    | AZOBR_100235 | 1: 0.00216, 2: 0.00372, 3: 0.00284,<br>4: 0.00299, 5: 0.00433, | 1: 0.00325, 2: 0.00236,<br>3: 0.00305, |
| AZOLI_1949 | 1: 0.00011, 2: 0.00007,                            |                                                    | AZOBR_100236 | 1: 0.00131, 2: 0.00237, 3: 0.00170,<br>4: 0.00156, 5: 0.00180, | 1: 0.00084, 2: 0.00095,<br>3: 0.00103, |
| AZOLI_1951 | 1: 0.00005, 2: 0.00008,<br>4: 0.00014,             | 2: 0.00015, 3: 0.00006,<br>4: 0.00021,             | AZOBR_100237 | 1: 0.00234, 2: 0.00128, 3: 0.00231,<br>4: 0.00142, 5: 0.00211, | 1: 0.00057, 2: 0.00083,<br>3: 0.00077, |
| AZOLI_1955 | 3: 0.00009, 4: 0.00008,                            |                                                    | AZOBR_100239 | 1: 0.00020, 2: 0.00029, 3: 0.00029,<br>4: 0.00046, 5: 0.00035, | 1: 0.00038, 2: 0.00024,<br>3: 0.00052, |
| AZOLI_1956 | 1: 0.00086, 2: 0.00209,<br>3: 0.00170, 4: 0.00233, | 1: 0.00082, 2: 0.00067,<br>3: 0.00111, 4: 0.00074, | AZOBR_100241 | 4: 0.00022,                                                    | 2: 0.00023, 3: 0.00060,                |
| AZOLI_1957 | 1: 0.00015, 2: 0.00033,<br>4: 0.00030,             | 1: 0.00013, 2: 0.00042,<br>3: 0.00022, 4: 0.00026, | AZOBR_100244 |                                                                |                                        |
| AZOLI_1960 | 1: 0.00194, 2: 0.00254,<br>3: 0.00507, 4: 0.00227, | 1: 0.00110, 2: 0.00162,<br>3: 0.00221, 4: 0.00242, | AZOBR_100245 | 1: 0.00021, 2: 0.00025, 3: 0.00018,<br>5: 0.00029,             | 1: 0.00022, 2: 0.00010,<br>3: 0.00026, |
| AZOLI_1961 | 1: 0.00012, 2: 0.00042,                            | 1: 0.00012, 2: 0.00012,<br>3: 0.00013, 4: 0.00021, | AZOBR_100246 | 3: 0.00006, 4: 0.00015, 5: 0.00005,                            | 1: 0.00005, 2: 0.00008,                |
| AZOLI_1962 | 1: 0.00133, 2: 0.00165,<br>3: 0.00065, 4: 0.00123, | 1: 0.00100, 2: 0.00094,<br>3: 0.00086, 4: 0.00075, | AZOBR_100247 | 1: 0.00106, 2: 0.00056, 3: 0.00060,<br>4: 0.00205, 5: 0.00161, | 1: 0.00073, 2: 0.00083,<br>3: 0.00097, |
| AZOLI_1969 |                                                    | 1: 0.00026, 3: 0.00037,<br>4: 0.00030,             | AZOBR_100248 | 1: 0.00024, 2: 0.00042, 3: 0.00032,<br>4: 0.00014, 5: 0.00014, | 1: 0.00024, 2: 0.00022,<br>3: 0.00008, |
| AZOLI_1973 | 1: 0.00010, 4: 0.00009,                            | 4: 0.00018,                                        | AZOBR_100249 | 1: 0.00038, 2: 0.00028, 3: 0.00041,<br>4: 0.00033, 5: 0.00033, | 1: 0.00028, 2: 0.00029,<br>3: 0.00035, |
| AZOLI_1975 | 2: 0.00035, 4: 0.00018,                            | 1: 0.00014, 2: 0.00027,                            | AZOBR_100251 | 1: 0.00161, 2: 0.00135, 3: 0.00137,<br>4: 0.00099, 5: 0.00074, | 1: 0.00144, 2: 0.00170,<br>3: 0.00061, |
| AZOLI_1976 | 2: 0.00012, 4: 0.00021,                            |                                                    | AZOBR_100259 | 1: 0.00005, 4: 0.00009, 5: 0.00009,                            | 3: 0.00003,                            |
| AZOLI_1978 | 1: 0.00010, 4: 0.00017,                            | 2: 0.00019, 4: 0.00013,                            | AZOBR_100260 | 1: 0.00054, 2: 0.00077, 3: 0.00092,<br>4: 0.00052, 5: 0.00067, | 1: 0.00062, 2: 0.00079,<br>3: 0.00121, |
| AZOLI_1979 | 1: 0.00253, 2: 0.00085,                            |                                                    | AZOBR_100263 |                                                                | 1: 0.00013, 3: 0.00009,                |
| AZOLI_1980 | 2: 0.00012, 4: 0.00016,                            | 1: 0.00012, 3: 0.00016,<br>4: 0.00008,             | AZOBR_100264 |                                                                | 1: 0.00035, 3: 0.00027,                |

|            |                                                 |                                                 |              |                                                             |                                     |
|------------|-------------------------------------------------|-------------------------------------------------|--------------|-------------------------------------------------------------|-------------------------------------|
| AZOLI_1996 | 2: 0.00027,                                     |                                                 | AZOBR_100265 | 2: 0.00012, 3: 0.00008, 4: 0.00016, 5: 0.00016,             | 1: 0.00013, 2: 0.00010, 3: 0.00019, |
| AZOLI_2071 |                                                 | 4: 0.00005,                                     | AZOBR_100267 | 1: 0.00019, 3: 0.00011,                                     | 2: 0.00009,                         |
| AZOLI_2101 | 4: 0.00011,                                     |                                                 | AZOBR_100268 | 2: 0.00009,                                                 | 1: 0.00020, 2: 0.00022, 3: 0.00041, |
| AZOLI_2110 | 1: 0.00002, 4: 0.00002,                         | 1: 0.00009, 2: 0.00009, 3: 0.00007, 4: 0.00006, | AZOBR_100274 | 1: 0.00300, 2: 0.00378, 3: 0.00237, 4: 0.00299, 5: 0.00326, | 1: 0.00356, 2: 0.00328, 3: 0.00304, |
| AZOLI_2113 | 1: 0.00013, 2: 0.00018, 3: 0.00031,             | 2: 0.00017, 4: 0.00030,                         | AZOBR_100275 | 1: 0.00510, 2: 0.00368, 3: 0.00434, 4: 0.00351, 5: 0.00405, | 1: 0.00237, 2: 0.00394, 3: 0.00365, |
| AZOLI_2115 | 1: 0.00013, 2: 0.00013, 4: 0.00026,             | 1: 0.00011, 2: 0.00009, 3: 0.00016, 4: 0.00006, | AZOBR_100276 | 1: 0.00906, 2: 0.00808, 3: 0.00679, 4: 0.00676, 5: 0.00550, | 1: 0.00677, 2: 0.00654, 3: 0.00407, |
| AZOLI_2121 | 2: 0.00023, 4: 0.00026,                         | 2: 0.00015, 4: 0.00020,                         | AZOBR_100277 | 1: 0.00058, 2: 0.00031, 3: 0.00064, 4: 0.00024, 5: 0.00024, | 2: 0.00034, 3: 0.00022,             |
| AZOLI_2122 | 1: 0.00007, 2: 0.00007, 4: 0.00021,             | 2: 0.00010, 4: 0.00021,                         | AZOBR_100278 | 1: 0.00212, 2: 0.00243, 3: 0.00267, 4: 0.00357, 5: 0.00325, | 1: 0.00151, 2: 0.00160, 3: 0.00200, |
| AZOLI_2125 |                                                 | 2: 0.00019, 3: 0.00021, 4: 0.00017,             | AZOBR_100281 |                                                             |                                     |
| AZOLI_2125 | 1: 0.00009, 2: 0.00013,                         | 1: 0.00016, 2: 0.00021, 3: 0.00017, 4: 0.00027, | AZOBR_100283 | 2: 0.00003, 4: 0.00009, 5: 0.00008,                         | 3: 0.00006,                         |
| AZOLI_2126 | 2: 0.00009,                                     | 1: 0.00021, 2: 0.00018, 3: 0.00019, 4: 0.00016, | AZOBR_100284 | 1: 0.00265, 2: 0.00234, 3: 0.00251, 4: 0.00266, 5: 0.00214, | 1: 0.00247, 2: 0.00176, 3: 0.00249, |
| AZOLI_2130 | 1: 0.00016, 4: 0.00014,                         | 2: 0.00011, 3: 0.00006, 4: 0.00012,             | AZOBR_100285 |                                                             |                                     |
| AZOLI_2132 | 1: 0.00007, 2: 0.00007, 4: 0.00004,             | 1: 0.00007, 2: 0.00009, 3: 0.00008, 4: 0.00012, | AZOBR_100286 | 1: 0.00050, 2: 0.00078, 3: 0.00075, 4: 0.00080, 5: 0.00050, | 1: 0.00025, 2: 0.00028, 3: 0.00045, |
| AZOLI_2133 | 4: 0.00006,                                     |                                                 | AZOBR_100287 | 3: 0.00013, 4: 0.00007,                                     | 1: 0.00010,                         |
| AZOLI_2134 | 2: 0.00007, 4: 0.00012,                         | 1: 0.00032, 2: 0.00021, 3: 0.00030, 4: 0.00018, | AZOBR_100292 |                                                             |                                     |
| AZOLI_2136 | 4: 0.00005,                                     |                                                 | AZOBR_100294 | 1: 0.00092, 2: 0.00064, 3: 0.00050, 4: 0.00053, 5: 0.00047, | 1: 0.00019, 2: 0.00064, 3: 0.00027, |
| AZOLI_2137 | 1: 0.00028, 2: 0.00037, 3: 0.00022, 4: 0.00023, | 1: 0.00023, 2: 0.00039, 3: 0.00024, 4: 0.00030, | AZOBR_100296 | 1: 0.00065, 2: 0.00044, 3: 0.00066, 4: 0.00064, 5: 0.00053, | 1: 0.00055, 2: 0.00038, 3: 0.00048, |
| AZOLI_2142 | 3: 0.00046,                                     | 2: 0.00040, 3: 0.00052, 4: 0.00042,             | AZOBR_100299 | 2: 0.00022, 3: 0.00021, 4: 0.00009, 5: 0.00022,             | 1: 0.00012, 2: 0.00009, 3: 0.00023, |
| AZOLI_2143 | 2: 0.00004, 3: 0.00008, 4: 0.00007,             | 1: 0.00006, 2: 0.00010, 3: 0.00012, 4: 0.00015, | AZOBR_100300 |                                                             |                                     |
| AZOLI_2145 | 1: 0.00386, 2: 0.00241, 3: 0.00204, 4: 0.00299, | 1: 0.00135, 2: 0.00164, 3: 0.00131, 4: 0.00141, | AZOBR_100301 | 2: 0.00031, 3: 0.00038,                                     | 1: 0.00023, 2: 0.00026, 3: 0.00017, |
| AZOLI_2146 | 1: 0.00024, 2: 0.00029, 4: 0.00016,             | 1: 0.00029, 2: 0.00023, 3: 0.00026,             | AZOBR_100302 | 2: 0.00025, 3: 0.00032, 4: 0.00013,                         | 2: 0.00014, 3: 0.00018,             |
| AZOLI_2150 |                                                 | 4: 0.00006,                                     | AZOBR_100303 | 3: 0.00024, 4: 0.00008, 5: 0.00011,                         | 1: 0.00014, 2: 0.00012, 3: 0.00014, |
| AZOLI_2151 | 1: 0.00018, 2: 0.00013, 4: 0.00023,             | 1: 0.00019, 2: 0.00010, 3: 0.00017, 4: 0.00007, | AZOBR_100304 | 1: 0.00016, 3: 0.00010, 4: 0.00020, 5: 0.00014,             | 2: 0.00018, 3: 0.00018,             |
| AZOLI_2152 | 1: 0.00066, 2: 0.00030, 4: 0.00076,             | 1: 0.00022, 4: 0.00025,                         | AZOBR_100305 | 4: 0.00010,                                                 | 3: 0.00018,                         |
| AZOLI_2154 |                                                 | 2: 0.00031, 4: 0.00036,                         | AZOBR_100311 | 2: 0.00015, 3: 0.00007, 4: 0.00010, 5: 0.00006,             | 1: 0.00011, 2: 0.00004,             |
| AZOLI_2156 |                                                 | 1: 0.00013, 2: 0.00012, 3: 0.00009, 4: 0.00010, | AZOBR_100312 | 3: 0.00004, 4: 0.00013, 5: 0.00011,                         | 1: 0.00016, 2: 0.00019, 3: 0.00030, |
| AZOLI_2160 |                                                 | 4: 0.00018,                                     | AZOBR_100314 | 1: 0.00122, 2: 0.00100, 3: 0.00089, 4: 0.00102, 5: 0.00145, | 1: 0.00067, 2: 0.00076, 3: 0.00092, |
| AZOLI_2165 | 1: 0.00155, 2: 0.00239, 3: 0.00076, 4: 0.00185, | 1: 0.00263, 2: 0.00324, 3: 0.00244, 4: 0.00227, | AZOBR_100316 | 1: 0.00008, 2: 0.00012, 3: 0.00011, 4: 0.00009, 5: 0.00007, | 1: 0.00015, 2: 0.00010, 3: 0.00018, |
| AZOLI_2169 | 1: 0.00014, 2: 0.00026, 3: 0.00041, 4: 0.00044, | 1: 0.00022, 2: 0.00025, 3: 0.00019, 4: 0.00016, | AZOBR_100317 | 1: 0.00069, 2: 0.00044, 3: 0.00043, 4: 0.00026, 5: 0.00035, | 2: 0.00014, 3: 0.00008,             |
| AZOLI_2172 | 1: 0.00030, 2: 0.00025, 4: 0.00009,             | 1: 0.00015, 2: 0.00015, 4: 0.00013,             | AZOBR_100318 | 1: 0.00021, 3: 0.00018, 4: 0.00011, 5: 0.00007,             | 1: 0.00017, 2: 0.00015, 3: 0.00016, |
| AZOLI_2173 | 1: 0.00032, 2: 0.00055, 3: 0.00018, 4: 0.00041, | 1: 0.00019, 2: 0.00025, 3: 0.00027, 4: 0.00022, | AZOBR_100319 |                                                             |                                     |
| AZOLI_2175 | 1: 0.00018,                                     |                                                 | AZOBR_100320 |                                                             |                                     |
| AZOLI_2176 | 1: 0.00091, 2: 0.00188, 3: 0.00022, 4: 0.00137, | 1: 0.00044, 2: 0.00027, 3: 0.00043, 4: 0.00017, | AZOBR_100322 |                                                             |                                     |
| AZOLI_2177 | 1: 0.00060, 2: 0.00042, 3: 0.00065, 4: 0.00012, | 1: 0.00047, 2: 0.00049, 3: 0.00035, 4: 0.00028, | AZOBR_100323 |                                                             |                                     |
| AZOLI_2180 | 1: 0.00026, 2: 0.00031, 3: 0.00015, 4: 0.00040, | 1: 0.00021, 2: 0.00038, 3: 0.00019, 4: 0.00040, | AZOBR_100325 | 1: 0.00304, 2: 0.00407, 3: 0.00317, 4: 0.00216, 5: 0.00351, | 1: 0.00414, 2: 0.00353, 3: 0.00321, |
| AZOLI_2183 | 1: 0.00044,                                     | 3: 0.00047,                                     | AZOBR_100326 | 1: 0.00092, 2: 0.00133, 3: 0.00128, 4: 0.00100, 5: 0.00087, | 1: 0.00078, 2: 0.00113, 3: 0.00097, |
| AZOLI_2188 | 1: 0.00059, 2: 0.00077, 3: 0.00059, 4: 0.00015, | 1: 0.00103, 2: 0.00066, 3: 0.00118, 4: 0.00044, | AZOBR_100329 | 1: 0.00020, 2: 0.00010, 3: 0.00013, 4: 0.00020, 5: 0.00019, | 1: 0.00025, 2: 0.00018, 3: 0.00024, |
| AZOLI_2190 | 1: 0.00006, 2: 0.00004, 4: 0.00005,             |                                                 | AZOBR_100333 | 4: 0.00017,                                                 | 1: 0.00037, 2: 0.00042, 3: 0.00092, |
| AZOLI_2191 |                                                 | 3: 0.00014,                                     | AZOBR_100334 |                                                             |                                     |
| AZOLI_2198 | 1: 0.00049, 2: 0.00028, 3: 0.00039, 4: 0.00078, | 1: 0.00064, 2: 0.00102, 3: 0.00067, 4: 0.00060, | AZOBR_100337 |                                                             | 1: 0.00017, 3: 0.00017,             |
| AZOLI_2200 | 1: 0.00010, 2: 0.00007, 3: 0.00026, 4: 0.00014, | 1: 0.00030, 2: 0.00029, 3: 0.00037, 4: 0.00043, | AZOBR_100340 | 1: 0.00025, 2: 0.00022, 3: 0.00052, 4: 0.00040, 5: 0.00019, | 1: 0.00014, 2: 0.00029, 3: 0.00013, |
| AZOLI_2201 | 1: 0.00024, 2: 0.00016, 3: 0.00015, 4: 0.00009, | 1: 0.00005, 2: 0.00005, 3: 0.00006, 4: 0.00009, | AZOBR_100341 | 1: 0.00017, 4: 0.00012, 5: 0.00015,                         | 2: 0.00008, 3: 0.00014,             |
| AZOLI_2202 | 1: 0.00063, 2: 0.00101, 3: 0.00030, 4: 0.00100, | 1: 0.00080, 2: 0.00036, 3: 0.00056, 4: 0.00041, | AZOBR_100344 | 4: 0.00021, 5: 0.00014,                                     | 1: 0.00050, 2: 0.00057, 3: 0.00068, |
| AZOLI_2203 | 1: 0.00008, 3: 0.00015,                         | 1: 0.00008, 3: 0.00009, 4: 0.00005,             | AZOBR_100347 |                                                             |                                     |
| AZOLI_2204 | 2: 0.00038, 3: 0.00099, 4: 0.00019,             | 1: 0.00071, 2: 0.00063, 3: 0.00035, 4: 0.00098, | AZOBR_100348 |                                                             |                                     |
| AZOLI_2208 | 1: 0.00045, 2: 0.00030, 4: 0.00052,             | 1: 0.00076, 2: 0.00059, 3: 0.00081, 4: 0.00091, | AZOBR_100353 | 1: 0.00026, 2: 0.00015, 3: 0.00033, 4: 0.00029, 5: 0.00027, | 1: 0.00077, 2: 0.00081, 3: 0.00085, |
| AZOLI_2212 | 2: 0.00015, 4: 0.00032,                         | 1: 0.00060, 2: 0.00051, 3: 0.00128, 4: 0.00077, | AZOBR_100354 | 4: 0.00028, 5: 0.00028,                                     | 1: 0.00052, 2: 0.00089, 3: 0.00044, |

|            |                                                    |                                                    |              |                                                                |                                        |
|------------|----------------------------------------------------|----------------------------------------------------|--------------|----------------------------------------------------------------|----------------------------------------|
| AZOLI_2213 | 4: 0.00009,                                        |                                                    | AZOBR_100355 |                                                                |                                        |
| AZOLI_2214 | 2: 0.00005, 3: 0.00032,<br>4: 0.00003,             | 1: 0.00043, 2: 0.00026,<br>3: 0.00034, 4: 0.00032, | AZOBR_100358 |                                                                | 1: 0.00002,                            |
| AZOLI_2215 | 1: 0.00030,                                        | 3: 0.00016,                                        | AZOBR_100361 |                                                                |                                        |
| AZOLI_2219 | 2: 0.00004, 4: 0.00010,                            | 4: 0.00003,                                        | AZOBR_100363 |                                                                |                                        |
| AZOLI_2228 | 1: 0.00046, 2: 0.00017,<br>3: 0.00046, 4: 0.00045, | 1: 0.00023, 2: 0.00086,<br>3: 0.00091, 4: 0.00054, | AZOBR_100364 | 1: 0.00017,                                                    |                                        |
| AZOLI_2232 | 1: 0.00350, 2: 0.00397,<br>3: 0.00334, 4: 0.00296, | 1: 0.00098, 2: 0.00101,<br>3: 0.00082, 4: 0.00081, | AZOBR_100368 |                                                                |                                        |
| AZOLI_2235 | 1: 0.00026,                                        | 2: 0.00025, 3: 0.00041,<br>4: 0.00033,             | AZOBR_100373 | 1: 0.00081, 2: 0.00057, 3: 0.00052,<br>4: 0.00047, 5: 0.00082, | 1: 0.00054, 2: 0.00054,<br>3: 0.00061, |
| AZOLI_2236 | 1: 0.00081, 2: 0.00082,<br>3: 0.00152, 4: 0.00075, | 1: 0.00061, 2: 0.00138,<br>3: 0.00051, 4: 0.00099, | AZOBR_100374 |                                                                | 3: 0.00010,                            |
| AZOLI_2237 | 1: 0.00021, 2: 0.00043,<br>4: 0.00045,             | 1: 0.00025, 2: 0.00011,<br>3: 0.00017, 4: 0.00020, | AZOBR_100375 |                                                                | 3: 0.00010,                            |
| AZOLI_2238 | 2: 0.00011, 4: 0.00018,                            |                                                    | AZOBR_100378 | 1: 0.00763, 2: 0.01249, 3: 0.00931,<br>4: 0.00850, 5: 0.00884, | 1: 0.00652, 2: 0.00625,<br>3: 0.00451, |
| AZOLI_2239 | 2: 0.00010, 4: 0.00006,                            |                                                    | AZOBR_100379 | 1: 0.00508, 2: 0.00585, 3: 0.00471,<br>4: 0.00362, 5: 0.00432, | 1: 0.00337, 2: 0.00436,<br>3: 0.00231, |
| AZOLI_2240 | 2: 0.00035, 3: 0.00048,<br>4: 0.00033,             | 1: 0.00042, 2: 0.00048,<br>3: 0.00033, 4: 0.00036, | AZOBR_100380 | 1: 0.00025, 2: 0.00037, 3: 0.00039,<br>4: 0.00020, 5: 0.00011, | 1: 0.00013, 2: 0.00006,<br>3: 0.00015, |
| AZOLI_2241 |                                                    | 1: 0.00067, 2: 0.00032,<br>3: 0.00071, 4: 0.00065, | AZOBR_100382 | 1: 0.00432, 2: 0.00375, 3: 0.00330,<br>4: 0.00631, 5: 0.00632, | 1: 0.00692, 2: 0.00602,<br>3: 0.00592, |
| AZOLI_2242 | 1: 0.00100, 2: 0.00066,<br>3: 0.00165, 4: 0.00105, | 1: 0.00114, 2: 0.00178,<br>3: 0.00126, 4: 0.00124, | AZOBR_100383 | 1: 0.00007, 2: 0.00019, 3: 0.00010,<br>4: 0.00013, 5: 0.00008, | 1: 0.00033, 2: 0.00026,<br>3: 0.00033, |
| AZOLI_2246 | 1: 0.00048, 2: 0.00048,<br>3: 0.00037, 4: 0.00018, |                                                    | AZOBR_100388 | 1: 0.00038, 2: 0.00030, 3: 0.00044,<br>4: 0.00019, 5: 0.00017, | 1: 0.00013, 2: 0.00027,<br>3: 0.00019, |
| AZOLI_2248 | 1: 0.00014, 4: 0.00024,                            |                                                    | AZOBR_100389 | 1: 0.00117, 2: 0.00071, 3: 0.00085,<br>4: 0.00094, 5: 0.00087, | 1: 0.00045, 2: 0.00063,<br>3: 0.00066, |
| AZOLI_2250 | 4: 0.00005,                                        | 1: 0.00006, 2: 0.00010,<br>3: 0.00009, 4: 0.00012, | AZOBR_100390 | 1: 0.00172, 2: 0.00159, 3: 0.00236,<br>4: 0.00294, 5: 0.00243, | 1: 0.00132, 2: 0.00237,<br>3: 0.00126, |
| AZOLI_2251 | 2: 0.00034, 4: 0.00039,                            | 1: 0.00034, 2: 0.00055,<br>3: 0.00048, 4: 0.00039, | AZOBR_100391 |                                                                | 1: 0.00049, 2: 0.00032,<br>3: 0.00082, |
| AZOLI_2252 | 1: 0.00124, 2: 0.00080,<br>4: 0.00078,             | 1: 0.00103, 2: 0.00144,<br>3: 0.00146, 4: 0.00147, | AZOBR_100398 | 4: 0.00008,                                                    |                                        |
| AZOLI_2257 | 1: 0.00018, 2: 0.00018,                            |                                                    | AZOBR_100400 |                                                                | 2: 0.00015,                            |
| AZOLI_2259 | 1: 0.00028, 2: 0.00086,<br>4: 0.00025,             | 2: 0.00021, 4: 0.00018,                            | AZOBR_100408 | 1: 0.00095, 2: 0.00094, 3: 0.00100,<br>4: 0.00139, 5: 0.00073, | 1: 0.00132, 2: 0.00123,<br>3: 0.00082, |
| AZOLI_2260 |                                                    | 2: 0.00005,                                        | AZOBR_100410 |                                                                | 1: 0.00016, 2: 0.00018,<br>3: 0.00017, |
| AZOLI_2261 | 4: 0.00021,                                        | 3: 0.00013, 4: 0.00021,                            | AZOBR_100411 |                                                                | 3: 0.00015,                            |
| AZOLI_2264 | 1: 0.00313, 2: 0.00204,<br>3: 0.00185, 4: 0.00226, | 1: 0.00123, 2: 0.00168,<br>3: 0.00173, 4: 0.00157, | AZOBR_110003 | 1: 0.00026, 2: 0.00031, 3: 0.00024,<br>4: 0.00036, 5: 0.00028, | 3: 0.00004,                            |
| AZOLI_2269 |                                                    | 3: 0.00008,                                        | AZOBR_110005 | 1: 0.00028, 2: 0.00015, 3: 0.00038,<br>4: 0.00021, 5: 0.00014, | 1: 0.00009, 2: 0.00018,<br>3: 0.00013, |
| AZOLI_2271 | 1: 0.00069, 2: 0.00086,<br>3: 0.00009, 4: 0.00073, | 1: 0.00010, 2: 0.00012,<br>3: 0.00007, 4: 0.00005, | AZOBR_110006 |                                                                | 3: 0.00006,                            |
| AZOLI_2272 | 2: 0.00018,                                        |                                                    | AZOBR_110010 | 3: 0.00012, 4: 0.00010,                                        | 2: 0.00015,                            |
| AZOLI_2275 | 1: 0.00411, 2: 0.00664,<br>3: 0.00898, 4: 0.00674, | 1: 0.00897, 2: 0.00763,<br>3: 0.00684, 4: 0.00746, | AZOBR_110011 | 1: 0.00025, 2: 0.00045, 3: 0.00032,<br>4: 0.00061, 5: 0.00044, | 1: 0.00012, 2: 0.00014,<br>3: 0.00024, |
| AZOLI_2284 | 1: 0.00018, 2: 0.00018,<br>3: 0.00020, 4: 0.00036, | 1: 0.00024, 2: 0.00027,<br>3: 0.00026, 4: 0.00021, | AZOBR_110015 |                                                                |                                        |
| AZOLI_2285 | 1: 0.00007, 2: 0.00010,<br>4: 0.00006,             | 1: 0.00010, 4: 0.00006,                            | AZOBR_110016 |                                                                |                                        |
| AZOLI_2288 | 1: 0.00049, 2: 0.00018,<br>4: 0.00042,             | 1: 0.00009, 2: 0.00009,<br>4: 0.00008,             | AZOBR_110019 | 1: 0.00064, 2: 0.00028, 3: 0.00095,<br>4: 0.00066, 5: 0.00039, | 1: 0.00046, 2: 0.00017,<br>3: 0.00055, |
| AZOLI_2290 | 1: 0.00069, 2: 0.00084,<br>3: 0.00123, 4: 0.00044, | 1: 0.00114, 2: 0.00096,<br>3: 0.00113, 4: 0.00113, | AZOBR_110020 |                                                                | 3: 0.00071,                            |
| AZOLI_2296 | 1: 0.00009,                                        |                                                    | AZOBR_110023 |                                                                |                                        |
| AZOLI_2300 | 1: 0.00199, 2: 0.00278,<br>3: 0.00323, 4: 0.00185, | 1: 0.00248, 2: 0.00254,<br>3: 0.00197, 4: 0.00225, | AZOBR_110028 |                                                                |                                        |
| AZOLI_2308 |                                                    | 2: 0.00003, 4: 0.00003,                            | AZOBR_110029 |                                                                |                                        |
| AZOLI_2309 |                                                    | 4: 0.00007,                                        | AZOBR_110031 | 1: 0.00116, 2: 0.00154, 3: 0.00111,<br>4: 0.00180, 5: 0.00120, | 1: 0.00102, 2: 0.00127,<br>3: 0.00108, |
| AZOLI_2311 |                                                    | 3: 0.00009,                                        | AZOBR_110032 | 4: 0.00040,                                                    |                                        |
| AZOLI_2313 |                                                    | 1: 0.00013,                                        | AZOBR_110033 | 4: 0.00004,                                                    | 2: 0.00004, 3: 0.00003,                |
| AZOLI_2314 |                                                    | 1: 0.00017, 2: 0.00012,<br>3: 0.00018, 4: 0.00022, | AZOBR_110035 | 4: 0.00021, 5: 0.00010,                                        | 1: 0.00010, 2: 0.00011,                |
| AZOLI_2316 |                                                    | 2: 0.00033, 3: 0.00048,<br>4: 0.00048,             | AZOBR_110037 | 1: 0.00041, 2: 0.00030, 3: 0.00052,<br>4: 0.00061, 5: 0.00033, | 1: 0.00022, 2: 0.00020,<br>3: 0.00026, |
| AZOLI_2317 |                                                    | 1: 0.00018, 2: 0.00017,<br>3: 0.00028, 4: 0.00010, | AZOBR_110041 | 1: 0.00028, 2: 0.00083, 3: 0.00085,<br>4: 0.00061, 5: 0.00042, | 1: 0.00039, 2: 0.00085,<br>3: 0.00066, |
| AZOLI_2318 |                                                    | 1: 0.00333, 2: 0.00224,<br>3: 0.00405, 4: 0.00368, | AZOBR_110043 |                                                                | 3: 0.00027,                            |
| AZOLI_2319 |                                                    | 2: 0.00047,                                        | AZOBR_110044 |                                                                |                                        |
| AZOLI_2320 |                                                    | 1: 0.00008, 2: 0.00008,<br>3: 0.00021, 4: 0.00010, | AZOBR_110045 | 3: 0.00043, 4: 0.00026, 5: 0.00017,                            | 3: 0.00016,                            |
| AZOLI_2321 |                                                    | 1: 0.00035, 2: 0.00030,<br>3: 0.00033, 4: 0.00030, | AZOBR_110052 | 5: 0.00026,                                                    | 1: 0.00024, 2: 0.00034,<br>3: 0.00041, |
| AZOLI_2326 |                                                    | 1: 0.00035, 2: 0.00042,<br>3: 0.00028, 4: 0.00074, | AZOBR_110057 | 4: 0.00010,                                                    |                                        |
| AZOLI_2333 | 2: 0.00017, 4: 0.00067,                            | 1: 0.00026, 2: 0.00059,<br>3: 0.00065, 4: 0.00060, | AZOBR_110059 |                                                                | 1: 0.00016, 3: 0.00010,                |
| AZOLI_2341 | 2: 0.00015, 4: 0.00046,                            | 1: 0.00038, 2: 0.00082,<br>4: 0.00066,             | AZOBR_110060 | 1: 0.00017, 3: 0.00009, 4: 0.00007,<br>5: 0.00005,             | 1: 0.00004, 2: 0.00007,<br>3: 0.00004, |
| AZOLI_2344 | 1: 0.00013, 2: 0.00018,<br>3: 0.00025, 4: 0.00028, | 1: 0.00020, 2: 0.00017,<br>3: 0.00021, 4: 0.00031, | AZOBR_110063 | 2: 0.00062, 3: 0.00045, 4: 0.00060,<br>5: 0.00060,             | 1: 0.00022, 2: 0.00038,                |
| AZOLI_2345 | 1: 0.00084, 2: 0.00093,<br>3: 0.00024, 4: 0.00064, | 1: 0.00050, 2: 0.00063,<br>3: 0.00061, 4: 0.00043, | AZOBR_110065 |                                                                |                                        |
| AZOLI_2348 | 1: 0.00133, 2: 0.00135,                            | 1: 0.00135, 2: 0.00116,                            | AZOBR_110066 |                                                                | 2: 0.00013, 3: 0.00011,                |

|            |                                                 |                                                 |              |                                                             |                                     |
|------------|-------------------------------------------------|-------------------------------------------------|--------------|-------------------------------------------------------------|-------------------------------------|
|            | 3: 0.00132, 4: 0.00128,                         | 3: 0.00143, 4: 0.00107,                         |              | 1: 0.00066, 2: 0.00078, 3: 0.00047, 4: 0.00098, 5: 0.00034, | 1: 0.00018, 2: 0.00024, 3: 0.00024, |
| AZOLI_2349 | 1: 0.00012, 2: 0.00017, 3: 0.00009, 4: 0.00022, | 1: 0.00023, 2: 0.00019, 3: 0.00028, 4: 0.00025, | AZOBR_110073 |                                                             |                                     |
| AZOLI_2353 | 1: 0.00019,                                     | 1: 0.00048, 2: 0.00019, 3: 0.00031, 4: 0.00025, | AZOBR_110076 |                                                             |                                     |
| AZOLI_2357 | 1: 0.00012, 2: 0.00017, 3: 0.00010, 4: 0.00017, | 1: 0.00020, 3: 0.00008, 4: 0.00006,             | AZOBR_110077 |                                                             | 1: 0.00024, 3: 0.00023,             |
| AZOLI_2358 | 1: 0.00025, 2: 0.00018, 4: 0.00031,             | 1: 0.00018, 2: 0.00022, 3: 0.00022, 4: 0.00022, | AZOBR_110079 | 1: 0.00416, 2: 0.00396, 3: 0.00449, 4: 0.00415, 5: 0.00326, | 1: 0.01626, 2: 0.02285, 3: 0.01188, |
| AZOLI_2360 | 1: 0.01263, 2: 0.01093, 3: 0.01025, 4: 0.00729, | 1: 0.01288, 2: 0.01438, 3: 0.01158, 4: 0.01341, | AZOBR_110082 | 2: 0.00054, 3: 0.00087, 4: 0.00042, 5: 0.00169,             | 1: 0.00052, 2: 0.00045, 3: 0.00025, |
| AZOLI_2361 | 1: 0.00127, 2: 0.00067, 3: 0.00022, 4: 0.00092, | 1: 0.00057, 2: 0.00060, 3: 0.00071, 4: 0.00075, | AZOBR_110083 | 4: 0.00006,                                                 | 3: 0.00023,                         |
| AZOLI_2364 |                                                 | 1: 0.00004,                                     | AZOBR_110084 |                                                             |                                     |
| AZOLI_2366 | 1: 0.00007, 4: 0.00015,                         | 1: 0.00017, 2: 0.00010, 4: 0.00006,             | AZOBR_110088 | 1: 0.00019, 2: 0.00011, 3: 0.00027, 4: 0.00022, 5: 0.00013, |                                     |
| AZOLI_2367 | 3: 0.00023,                                     |                                                 | AZOBR_110089 | 1: 0.00043, 2: 0.00033, 3: 0.00042, 4: 0.00025,             | 1: 0.00016, 3: 0.00008,             |
| AZOLI_2371 | 4: 0.00003,                                     | 3: 0.00004,                                     | AZOBR_110090 | 2: 0.00016, 3: 0.00021, 4: 0.00010,                         | 3: 0.00006,                         |
| AZOLI_2372 | 2: 0.00010, 4: 0.00013,                         | 1: 0.00141, 2: 0.00095, 3: 0.00099, 4: 0.00071, | AZOBR_110092 |                                                             |                                     |
| AZOLI_2380 | 1: 0.00056, 2: 0.00107, 3: 0.00070, 4: 0.00054, | 1: 0.00095, 2: 0.00085, 3: 0.00060, 4: 0.00043, | AZOBR_110093 | 1: 0.00032, 2: 0.00028, 3: 0.00045, 4: 0.00025, 5: 0.00033, | 1: 0.00007, 2: 0.00012, 3: 0.00013, |
| AZOLI_2381 | 1: 0.00025, 2: 0.00018, 3: 0.00015, 4: 0.00040, | 1: 0.00014, 2: 0.00017, 3: 0.00023, 4: 0.00040, | AZOBR_110094 | 3: 0.00013, 4: 0.00026, 5: 0.00010,                         |                                     |
| AZOLI_2383 | 1: 0.00193, 2: 0.00255, 4: 0.00090,             | 1: 0.00151, 2: 0.00087, 3: 0.00096, 4: 0.00103, | AZOBR_110095 | 1: 0.00040, 2: 0.00053, 3: 0.00052, 4: 0.00042, 5: 0.00056, | 1: 0.00116, 2: 0.00103, 3: 0.00125, |
| AZOLI_2384 | 1: 0.00071, 2: 0.00090, 4: 0.00092,             |                                                 | AZOBR_110096 | 1: 0.00016, 2: 0.00019, 3: 0.00019, 4: 0.00007,             | 1: 0.00010, 2: 0.00012, 3: 0.00007, |
| AZOLI_2387 | 1: 0.00330, 2: 0.00304, 3: 0.00611, 4: 0.00224, | 1: 0.00736, 2: 0.00911, 3: 0.00896, 4: 0.00986, | AZOBR_110098 |                                                             |                                     |
| AZOLI_2388 | 1: 0.00480, 2: 0.00438, 3: 0.01002, 4: 0.00499, | 1: 0.00910, 2: 0.00833, 3: 0.01065, 4: 0.00920, | AZOBR_110099 | 1: 0.00017, 3: 0.00015, 4: 0.00018, 5: 0.00006,             |                                     |
| AZOLI_2391 | 1: 0.00102, 2: 0.00189, 3: 0.00370, 4: 0.00217, | 1: 0.00201, 2: 0.00241, 3: 0.00236, 4: 0.00250, | AZOBR_110102 | 1: 0.00255, 2: 0.00327, 3: 0.00217, 4: 0.00234, 5: 0.00234, | 1: 0.00396, 2: 0.00287, 3: 0.00317, |
| AZOLI_2392 | 1: 0.00094, 2: 0.00206, 4: 0.00054,             | 1: 0.00143, 2: 0.00215, 3: 0.00152, 4: 0.00068, | AZOBR_110104 | 1: 0.00500, 2: 0.00598, 3: 0.00591, 4: 0.00489, 5: 0.00857, | 1: 0.00341, 2: 0.00282, 3: 0.00371, |
| AZOLI_2393 | 1: 0.00011,                                     | 1: 0.00009,                                     | AZOBR_110105 | 1: 0.00380, 2: 0.00495, 3: 0.00281, 4: 0.00248, 5: 0.00449, | 1: 0.00282, 2: 0.00299, 3: 0.00268, |
| AZOLI_2395 | 4: 0.00006,                                     | 1: 0.00013, 2: 0.00035, 3: 0.00024, 4: 0.00014, | AZOBR_110106 | 1: 0.00009, 2: 0.00040, 3: 0.00043, 4: 0.00050, 5: 0.00031, | 1: 0.00023, 2: 0.00037, 3: 0.00034, |
| AZOLI_2402 | 1: 0.01223, 2: 0.01157, 3: 0.00969, 4: 0.00606, | 1: 0.00372, 2: 0.00358, 3: 0.00377, 4: 0.00423, | AZOBR_110107 | 1: 0.00047, 2: 0.00058, 3: 0.00030, 4: 0.00041, 5: 0.00074, | 1: 0.00091, 2: 0.00078, 3: 0.00133, |
| AZOLI_2404 |                                                 | 2: 0.00014,                                     | AZOBR_110108 | 3: 0.00094, 4: 0.00038, 5: 0.00063,                         | 1: 0.00306, 2: 0.00214, 3: 0.00217, |
| AZOLI_2408 | 1: 0.00166, 2: 0.00246, 3: 0.00125, 4: 0.00239, | 1: 0.00157, 2: 0.00184, 3: 0.00083, 4: 0.00086, | AZOBR_110109 | 1: 0.00093, 2: 0.00156, 3: 0.00088, 4: 0.00109, 5: 0.00100, | 1: 0.00080, 2: 0.00096, 3: 0.00073, |
| AZOLI_2409 | 1: 0.00321, 2: 0.00300, 3: 0.00621, 4: 0.00216, | 1: 0.00362, 2: 0.00349, 3: 0.00435, 4: 0.00206, | AZOBR_110110 |                                                             | 2: 0.00006,                         |
| AZOLI_2411 | 1: 0.00050, 2: 0.00035, 4: 0.00041,             | 1: 0.00021, 2: 0.00018, 3: 0.00011, 4: 0.00018, | AZOBR_110113 | 4: 0.00008, 5: 0.00008,                                     | 1: 0.00011, 2: 0.00010, 3: 0.00015, |
| AZOLI_2412 | 1: 0.00009, 2: 0.00018, 4: 0.00026,             | 4: 0.00008,                                     | AZOBR_110114 | 1: 0.00130, 2: 0.00185, 3: 0.00127, 4: 0.00089, 5: 0.00134, | 1: 0.00091, 2: 0.00109, 3: 0.00115, |
| AZOLI_2415 | 1: 0.00036, 2: 0.00056, 3: 0.00027, 4: 0.00075, | 1: 0.00054, 2: 0.00078, 3: 0.00057, 4: 0.00050, | AZOBR_110115 |                                                             |                                     |
| AZOLI_2416 |                                                 | 3: 0.00005,                                     | AZOBR_110117 | 1: 0.00018, 3: 0.00047, 4: 0.00057, 5: 0.00025,             | 2: 0.00013,                         |
| AZOLI_2417 | 1: 0.00033, 2: 0.00046, 3: 0.00049, 4: 0.00075, | 1: 0.00033, 2: 0.00038, 3: 0.00054, 4: 0.00058, | AZOBR_110119 |                                                             |                                     |
| AZOLI_2419 | 4: 0.00020,                                     | 2: 0.00030, 3: 0.00025,                         | AZOBR_110120 | 1: 0.00009, 2: 0.00011, 3: 0.00022, 4: 0.00024, 5: 0.00024, | 1: 0.00006, 2: 0.00013,             |
| AZOLI_2421 | 1: 0.00051, 2: 0.00032, 3: 0.00011, 4: 0.00090, | 2: 0.00010, 3: 0.00009, 4: 0.00021,             | AZOBR_110123 | 1: 0.00008, 4: 0.00008,                                     | 1: 0.00008, 2: 0.00012,             |
| AZOLI_2423 | 1: 0.00056, 2: 0.00042, 3: 0.00029, 4: 0.00030, | 1: 0.00028, 2: 0.00041, 3: 0.00022, 4: 0.00018, | AZOBR_110125 | 2: 0.00049, 3: 0.00016, 4: 0.00070, 5: 0.00083,             | 1: 0.00012, 3: 0.00115,             |
| AZOLI_2425 | 1: 0.00037, 2: 0.00057, 4: 0.00016,             | 1: 0.00019, 2: 0.00055, 4: 0.00048,             | AZOBR_110127 |                                                             |                                     |
| AZOLI_2426 | 1: 0.00004, 2: 0.00007, 3: 0.00006, 4: 0.00003, | 1: 0.00009, 3: 0.00017, 4: 0.00014,             | AZOBR_110128 | 1: 0.00007, 2: 0.00006, 3: 0.00009,                         | 1: 0.00014, 2: 0.00008, 3: 0.00011, |
| AZOLI_2427 | 4: 0.00016,                                     | 1: 0.00025, 2: 0.00037, 3: 0.00020, 4: 0.00043, | AZOBR_120001 | 1: 0.00035, 2: 0.00031, 3: 0.00045,                         |                                     |
| AZOLI_2431 |                                                 | 1: 0.00016, 2: 0.00019, 3: 0.00010, 4: 0.00017, | AZOBR_120007 |                                                             | 1: 0.00007,                         |
| AZOLI_2433 | 2: 0.00034, 4: 0.00039,                         | 1: 0.00045, 2: 0.00022, 3: 0.00048, 4: 0.00087, | AZOBR_120009 |                                                             |                                     |
| AZOLI_2434 |                                                 | 2: 0.00009,                                     | AZOBR_120010 |                                                             | 1: 0.00017, 2: 0.00014, 3: 0.00033, |
| AZOLI_2437 | 1: 0.00787, 2: 0.00884, 3: 0.01273, 4: 0.00617, | 1: 0.00664, 2: 0.00601, 3: 0.00375, 4: 0.00484, | AZOBR_120014 |                                                             |                                     |
| AZOLI_2439 | 1: 0.00021, 2: 0.00043, 3: 0.00040, 4: 0.00062, | 1: 0.00044, 2: 0.00021, 3: 0.00054, 4: 0.00056, | AZOBR_120019 |                                                             | 1: 0.00042, 2: 0.00024, 3: 0.00024, |
| AZOLI_2441 |                                                 | 1: 0.00022, 2: 0.00019, 3: 0.00024, 4: 0.00005, | AZOBR_120020 |                                                             | 1: 0.00004, 2: 0.00004, 3: 0.00003, |
| AZOLI_2443 | 3: 0.00007, 4: 0.00003,                         |                                                 | AZOBR_120021 |                                                             | 3: 0.00016,                         |
| AZOLI_2447 | 1: 0.00006,                                     | 1: 0.00009, 2: 0.00011, 3: 0.00012, 4: 0.00010, | AZOBR_120022 | 4: 0.00010,                                                 | 1: 0.00042, 2: 0.00064, 3: 0.00067, |
| AZOLI_2449 | 2: 0.00009, 4: 0.00027,                         |                                                 | AZOBR_120034 | 1: 0.00040, 4: 0.00048, 5: 0.00021,                         | 1: 0.00102, 2: 0.00072, 3: 0.00111, |
| AZOLI_2450 | 2: 0.00009, 4: 0.00005,                         | 1: 0.00009, 2: 0.00014, 3: 0.00016, 4: 0.00008, | AZOBR_120036 | 2: 0.00065, 3: 0.00038, 4: 0.00041, 5: 0.00082,             | 1: 0.00057, 2: 0.00032, 3: 0.00064, |

|            |                                                                               |                                                    |              |                                                                |                                                                   |
|------------|-------------------------------------------------------------------------------|----------------------------------------------------|--------------|----------------------------------------------------------------|-------------------------------------------------------------------|
| AZOLI_2451 | 4: 0.00005,                                                                   | 1: 0.00005, 4: 0.00007,                            | AZOBR_120038 | 1: 0.00030, 2: 0.00036, 3: 0.00017,<br>4: 0.00042, 5: 0.00028, |                                                                   |
| AZOLI_2454 | 1: 0.00075, 2: 0.00072,<br>3: 0.00019, 4: 0.00080,                            | 1: 0.00103, 2: 0.00100,<br>3: 0.00052, 4: 0.00065, | AZOBR_120039 | 2: 0.00007, 3: 0.00016, 4: 0.00013,<br>5: 0.00005,             | 2: 0.00011, 3: 0.00009,                                           |
| AZOLI_2457 |                                                                               | 4: 0.00006,                                        | AZOBR_120040 | 1: 0.00145, 2: 0.00260, 3: 0.00113,<br>4: 0.00150, 5: 0.00236, | 1: 0.01075, 2: 0.01175,<br>3: 0.00708,                            |
| AZOLI_2459 | 1: 0.01198, 2: 0.01630,<br>3: 0.00937, 4: 0.00704,                            | 1: 0.00485, 2: 0.00431,<br>3: 0.00481, 4: 0.00455, | AZOBR_120043 | 4: 0.00031,                                                    | 2: 0.00012,                                                       |
| AZOLI_2460 | 1: 0.00037, 2: 0.00040,<br>3: 0.00043, 4: 0.00032,                            | 1: 0.00053, 2: 0.00039,<br>3: 0.00043, 4: 0.00032, | AZOBR_120044 |                                                                | 1: 0.00008,                                                       |
| AZOLI_2465 | 2: 0.00009, 4: 0.00005,                                                       | 4: 0.00005,                                        | AZOBR_120048 | 1: 0.00015, 2: 0.00013, 3: 0.00016,<br>4: 0.00013, 5: 0.00020, | 1: 0.00012, 2: 0.00025,<br>3: 0.00027,                            |
| AZOLI_2468 | 1: 0.00051, 2: 0.00059,<br>4: 0.00057,                                        | 3: 0.00047, 4: 0.00025,                            | AZOBR_120049 | 2: 0.00016,                                                    | 3: 0.00012,                                                       |
| AZOLI_2469 | 1: 0.00002,                                                                   |                                                    | AZOBR_120050 | 1: 0.00065, 2: 0.00054, 3: 0.00067,<br>4: 0.00090, 5: 0.00081, | 1: 0.00019, 2: 0.00051,<br>3: 0.00049,                            |
| AZOLI_2470 | 2: 0.00002,                                                                   | 2: 0.00002,                                        | AZOBR_120052 |                                                                |                                                                   |
| AZOLI_2471 | 1: 0.00019, 2: 0.00032,<br>3: 0.00038, 4: 0.00044,                            | 1: 0.00030, 2: 0.00031,<br>3: 0.00029, 4: 0.00021, | AZOBR_120057 | 1: 0.00080, 2: 0.00082, 3: 0.00040,<br>4: 0.00128, 5: 0.00106, | 1: 0.00060, 2: 0.00029,<br>3: 0.00046,                            |
| AZOLI_2473 | 1: 0.00045, 2: 0.00091,<br>3: 0.00117, 4: 0.00059,                            | 1: 0.00130, 2: 0.00133,<br>3: 0.00227, 4: 0.00150, | AZOBR_120058 | 4: 0.00019, 5: 0.00037,                                        | 1: 0.00017, 3: 0.00067,                                           |
| AZOLI_2474 | 3: 0.00060, 4: 0.00049,                                                       | 1: 0.00115, 2: 0.00167,<br>3: 0.00153, 4: 0.00148, | AZOBR_120059 | 1: 0.00174, 2: 0.00089, 3: 0.00171,<br>4: 0.00180, 5: 0.00125, | 1: 0.00056, 2: 0.00097,<br>3: 0.00033,                            |
| AZOLI_2475 | 4: 0.00013,                                                                   | 1: 0.00015, 2: 0.00015,<br>3: 0.00016, 4: 0.00013, | AZOBR_120060 | 1: 0.00141, 2: 0.00120, 3: 0.00094,<br>4: 0.00152, 5: 0.00166, | 1: 0.00161, 2: 0.00091,<br>3: 0.00103,                            |
| AZOLI_2476 | 1: 0.00027, 2: 0.00017,<br>4: 0.00035,                                        | 1: 0.00028, 2: 0.00020,<br>3: 0.00022, 4: 0.00024, | AZOBR_120061 | 1: 0.00042, 3: 0.00036, 4: 0.00046,<br>5: 0.00047,             | 1: 0.00027, 2: 0.00025,<br>3: 0.00037,                            |
| AZOLI_2478 | 1: 0.00014, 4: 0.00019,<br>1: 0.00228, 2: 0.00196,<br>3: 0.00198, 4: 0.00184, | 1: 0.00012, 2: 0.00014,<br>3: 0.00018, 4: 0.00012, | AZOBR_120063 | 1: 0.00010, 2: 0.00004, 3: 0.00004,<br>4: 0.00002, 5: 0.00002, | 1: 0.00007, 2: 0.00006,<br>3: 0.00003,                            |
| AZOLI_2479 | 1: 0.00107, 2: 0.00040,<br>3: 0.00042, 4: 0.00075,                            | 1: 0.00049, 2: 0.00062,<br>3: 0.00026, 4: 0.00048, | AZOBR_120064 |                                                                | 1: 0.00013, 3: 0.00003,                                           |
| AZOLI_2484 | 1: 0.00019, 2: 0.00040,<br>3: 0.00042, 4: 0.00075,                            | 1: 0.00027, 2: 0.00020,<br>3: 0.00021, 4: 0.00014, | AZOBR_120065 |                                                                |                                                                   |
| AZOLI_2485 | 1: 0.00019, 2: 0.00026,<br>4: 0.00029,                                        | 1: 0.00056, 2: 0.00035,<br>3: 0.00050, 4: 0.00042, | AZOBR_130001 |                                                                | 2: 0.00033,                                                       |
| AZOLI_2490 | 1: 0.00014,                                                                   |                                                    | AZOBR_130002 | 1: 0.00019, 2: 0.00026, 3: 0.00029,<br>4: 0.00021, 5: 0.00015, | 1: 0.00014, 2: 0.00008,<br>3: 0.00012,                            |
| AZOLI_2491 | 1: 0.00018, 2: 0.00025,<br>4: 0.00018,                                        | 1: 0.00032, 2: 0.00014,<br>3: 0.00023, 4: 0.00009, | AZOBR_130003 | 2: 0.00012, 4: 0.00019, 5: 0.00019,                            |                                                                   |
| AZOLI_2492 | 4: 0.00023,                                                                   |                                                    | AZOBR_130005 | 1: 0.00023, 2: 0.00005, 3: 0.00005,<br>4: 0.00010,             | 1: 0.00018, 2: 0.00020,<br>3: 0.00010,                            |
| AZOLI_2496 | 1: 0.00010, 2: 0.00015,<br>4: 0.00036,                                        |                                                    | AZOBR_130006 |                                                                |                                                                   |
| AZOLI_2501 | 2: 0.00015, 4: 0.00007,                                                       |                                                    | AZOBR_130008 | 1: 0.00011, 3: 0.00006, 4: 0.00008,                            | 1: 0.00017, 2: 0.00016,<br>3: 0.00041,                            |
| AZOLI_2503 | 2: 0.00031, 3: 0.00011,<br>4: 0.00013,                                        | 1: 0.00023, 2: 0.00034,<br>3: 0.00016, 4: 0.00007, | AZOBR_130010 |                                                                |                                                                   |
| AZOLI_2511 | 4: 0.00015,                                                                   | 1: 0.00024, 3: 0.00013,<br>4: 0.00015,             | AZOBR_130012 | 3: 0.00007, 4: 0.00009,                                        | 1: 0.00008, 2: 0.00009,<br>3: 0.00011,                            |
| AZOLI_2512 |                                                                               | 1: 0.00009, 2: 0.00012,<br>3: 0.00013, 4: 0.00004, | AZOBR_130016 |                                                                |                                                                   |
| AZOLI_2517 |                                                                               | 4: 0.00020,                                        | AZOBR_130017 | 1: 0.00131, 2: 0.00116, 3: 0.00081,<br>4: 0.00076, 5: 0.00112, | 1: 0.00257, 2: 0.00280,<br>3: 0.00177,                            |
| AZOLI_2519 | 2: 0.00009, 4: 0.00011,                                                       | 1: 0.00018, 2: 0.00008,<br>3: 0.00019,             | AZOBR_130018 | 5: 0.00007,                                                    | 1: 0.00004,                                                       |
| AZOLI_2520 | 1: 0.00050, 2: 0.00050,<br>3: 0.00025, 4: 0.00058,                            | 1: 0.00021, 2: 0.00023,<br>3: 0.00035, 4: 0.00038, | AZOBR_130026 | 1: 0.00032, 2: 0.00042, 4: 0.00066,                            | 1: 0.00153, 2: 0.00070,<br>3: 0.00099,                            |
| AZOLI_2523 | 1: 0.00075, 2: 0.00043,<br>3: 0.00032, 4: 0.00088,                            | 1: 0.00007, 2: 0.00016,<br>4: 0.00011,             | AZOBR_130027 | 1: 0.00021, 2: 0.00094, 3: 0.00027,<br>4: 0.00074, 5: 0.00103, | 1: 0.00130, 2: 0.00109,<br>3: 0.00159,                            |
| AZOLI_2525 |                                                                               | 4: 0.00018,                                        | AZOBR_130028 |                                                                | 1: 0.00011, 3: 0.00021,                                           |
| AZOLI_2526 | 1: 0.00028, 2: 0.00042,<br>3: 0.00072, 4: 0.00032,                            | 1: 0.00112, 2: 0.00104,<br>3: 0.00107, 4: 0.00129, | AZOBR_130030 | 1: 0.00010, 4: 0.00007,                                        | 1: 0.00021, 2: 0.00005,<br>3: 0.00008,                            |
| AZOLI_2528 | 1: 0.00016, 2: 0.00016,<br>4: 0.00014,                                        | 1: 0.00033, 2: 0.00016,<br>3: 0.00026, 4: 0.00021, | AZOBR_130031 |                                                                |                                                                   |
| AZOLI_2531 |                                                                               | 1: 0.00029, 2: 0.00028,<br>3: 0.00018, 4: 0.00034, | AZOBR_130037 | 1: 0.00019, 3: 0.00024, 4: 0.00039,                            | 2: 0.00035,                                                       |
| AZOLI_2547 | 1: 0.00037, 2: 0.00083,<br>3: 0.00039, 4: 0.00055,                            | 1: 0.00033, 2: 0.00045,<br>3: 0.00034, 4: 0.00020, | AZOBR_130039 | 2: 0.00006, 3: 0.00009, 4: 0.00005,                            |                                                                   |
| AZOLI_2558 | 4: 0.00005,                                                                   | 1: 0.00024, 2: 0.00046,<br>3: 0.00016, 4: 0.00025, | AZOBR_130040 | 1: 0.00017, 3: 0.00014, 4: 0.00034,                            | 3: 0.00015,                                                       |
| AZOLI_2562 |                                                                               | 1: 0.00013, 3: 0.00025,<br>4: 0.00017,             | AZOBR_130044 |                                                                | 2: 0.00008,                                                       |
| AZOLI_2563 |                                                                               | 1: 0.00007, 2: 0.00006,<br>3: 0.00014,             | AZOBR_140002 | 1: 0.00041, 2: 0.00019, 3: 0.00028,<br>4: 0.00033, 5: 0.00022, | 1: 0.00025, 2: 0.00014,<br>3: 0.00028,                            |
| AZOLI_2564 | 1: 0.00007, 2: 0.00007,<br>3: 0.00007, 4: 0.00006,                            | 3: 0.00004, 4: 0.00004,                            | AZOBR_140004 | 4: 0.00095, 5: 0.00095,                                        | 1: 0.00050, 3: 0.00024,<br>1: 0.00089, 2: 0.00071,<br>3: 0.00043, |
| AZOLI_2565 | 2: 0.00007, 4: 0.00006,                                                       |                                                    | AZOBR_140005 | 1: 0.00154, 2: 0.00099, 3: 0.00071,                            | 1: 0.00009,                                                       |
| AZOLI_2572 |                                                                               | 2: 0.00068, 4: 0.00105,                            | AZOBR_140006 |                                                                |                                                                   |
| AZOLI_2573 | 2: 0.00005,                                                                   |                                                    | AZOBR_140007 | 1: 0.00016, 3: 0.00009, 4: 0.00011,                            |                                                                   |
| AZOLI_2574 | 2: 0.00040, 3: 0.00033,<br>4: 0.00034,                                        | 1: 0.00127, 2: 0.00123,<br>3: 0.00093, 4: 0.00081, | AZOBR_140009 | 2: 0.00072, 3: 0.00040, 4: 0.00048,<br>5: 0.00028,             | 1: 0.00056, 2: 0.00055,<br>3: 0.00079,                            |
| AZOLI_2575 | 1: 0.00009, 4: 0.00007,                                                       | 1: 0.00009, 2: 0.00010,<br>3: 0.00007, 4: 0.00015, | AZOBR_140011 | 4: 0.00014, 5: 0.00014,                                        | 3: 0.00022,                                                       |
| AZOLI_2579 | 1: 0.00010, 2: 0.00010,<br>3: 0.00009, 4: 0.00005,                            | 1: 0.00029, 2: 0.00040,<br>3: 0.00034, 4: 0.00019, | AZOBR_140012 | 1: 0.00008, 3: 0.00007, 4: 0.00011,<br>5: 0.00008,             | 2: 0.00009,                                                       |
| AZOLI_2580 | 1: 0.00036, 2: 0.00037,<br>3: 0.00026, 4: 0.00016,                            | 1: 0.00148, 2: 0.00160,<br>3: 0.00108, 4: 0.00063, | AZOBR_140014 |                                                                |                                                                   |
| AZOLI_2583 |                                                                               | 3: 0.00034,                                        | AZOBR_140016 | 4: 0.00005,                                                    |                                                                   |
| AZOLI_2591 | 3: 0.00074,                                                                   | 3: 0.00042,                                        | AZOBR_140017 | 1: 0.00139, 2: 0.00131, 3: 0.00110,                            | 1: 0.00085, 2: 0.00092,                                           |

|            |                                                                               |                                                                                              |              |                                                                |                                        |
|------------|-------------------------------------------------------------------------------|----------------------------------------------------------------------------------------------|--------------|----------------------------------------------------------------|----------------------------------------|
|            |                                                                               |                                                                                              |              | 4: 0.00096, 5: 0.00109,                                        | 3: 0.00118,                            |
| AZOLI_2595 | 2: 0.00070, 3: 0.00146,<br>4: 0.00074,                                        | 1: 0.00070, 2: 0.00042,<br>3: 0.00056, 4: 0.00022,                                           | AZOBR_140018 | 1: 0.00101, 2: 0.00081, 3: 0.00117,<br>4: 0.00089, 5: 0.00089, | 1: 0.00071, 2: 0.00047,<br>3: 0.00154, |
| AZOLI_2596 | 1: 0.00068, 2: 0.00081,<br>3: 0.00069, 4: 0.00122,                            | 1: 0.00025, 2: 0.00048,<br>3: 0.00033, 4: 0.00042,                                           | AZOBR_140023 | 1: 0.00008, 3: 0.00010,                                        |                                        |
| AZOLI_2598 | 1: 0.00036, 2: 0.00023,<br>3: 0.00019, 4: 0.00094,                            | 1: 0.00007, 2: 0.00015,<br>3: 0.00012, 4: 0.00017,                                           | AZOBR_140024 |                                                                |                                        |
| AZOLI_2599 | 1: 0.00067, 2: 0.00095,<br>3: 0.00039, 4: 0.00062,                            | 1: 0.00051, 2: 0.00060,<br>3: 0.00036, 4: 0.00034,                                           | AZOBR_140025 | 1: 0.00052, 2: 0.00126, 3: 0.00099,<br>4: 0.00098, 5: 0.00098, | 1: 0.00100, 2: 0.00104,<br>3: 0.00097, |
| AZOLI_2601 | 1: 0.00115, 2: 0.00058,<br>3: 0.00358, 4: 0.00177,                            | 1: 0.00108, 2: 0.00272,<br>3: 0.00211, 4: 0.00205,                                           | AZOBR_140030 |                                                                |                                        |
| AZOLI_2602 | 1: 0.00560, 2: 0.00384,<br>3: 0.00970, 4: 0.00386,                            | 1: 0.00667, 2: 0.00525,<br>3: 0.00526, 4: 0.00603,                                           | AZOBR_140031 |                                                                |                                        |
| AZOLI_2603 | 1: 0.00054, 2: 0.00050,<br>3: 0.00227, 4: 0.00155,                            | 1: 0.00121, 2: 0.00169,<br>3: 0.00123, 4: 0.00166,                                           | AZOBR_140032 |                                                                |                                        |
| AZOLI_2604 | 1: 0.00220, 2: 0.00209,<br>3: 0.00476, 4: 0.00314,                            | 1: 0.00221, 2: 0.00217,<br>3: 0.00219, 4: 0.00238,                                           | AZOBR_140042 |                                                                |                                        |
| AZOLI_2605 | 1: 0.00527, 2: 0.00580,<br>3: 0.00776, 4: 0.00310,                            | 1: 0.00449, 2: 0.00281,<br>3: 0.00315, 4: 0.00383,                                           | AZOBR_140045 |                                                                | 2: 0.00013, 3: 0.00007,                |
| AZOLI_2619 | 1: 0.00090, 2: 0.00120,<br>3: 0.00284, 4: 0.00084,                            | 1: 0.00138, 2: 0.00169,<br>3: 0.00157, 4: 0.00177,                                           | AZOBR_140047 |                                                                | 2: 0.00008, 3: 0.00010,                |
| AZOLI_2623 |                                                                               | 1: 0.00021, 2: 0.00018,<br>3: 0.00023, 4: 0.00030,                                           | AZOBR_140051 | 4: 0.00026,                                                    | 3: 0.00012,                            |
| AZOLI_2628 | 1: 0.00044, 2: 0.00088,<br>4: 0.00052,                                        | 1: 0.00022, 2: 0.00059,<br>3: 0.00041, 4: 0.00028,                                           | AZOBR_140052 | 1: 0.00036, 3: 0.00030, 5: 0.00010,                            | 1: 0.00009,                            |
| AZOLI_2629 | 4: 0.00005,                                                                   | 4: 0.00004,                                                                                  | AZOBR_140054 |                                                                | 1: 0.00006, 2: 0.00009,<br>3: 0.00016, |
| AZOLI_2630 | 1: 0.00134, 2: 0.00155,<br>3: 0.00297, 4: 0.00206,                            | 1: 0.00228, 2: 0.00234,<br>3: 0.00226, 4: 0.00239,                                           | AZOBR_140061 | 3: 0.00006, 4: 0.00010, 5: 0.00005,                            | 1: 0.00012, 2: 0.00011,<br>3: 0.00024, |
| AZOLI_2632 |                                                                               | 4: 0.00003,                                                                                  | AZOBR_140062 | 4: 0.00018,                                                    | 1: 0.00017, 2: 0.00025,<br>3: 0.00011, |
| AZOLI_2633 | 1: 0.00190, 2: 0.00203,<br>3: 0.00536, 4: 0.00146,                            | 1: 0.00493, 2: 0.00320,<br>3: 0.00340, 4: 0.00320,                                           | AZOBR_140065 | 3: 0.00005,                                                    |                                        |
| AZOLI_2635 | 1: 0.00017, 2: 0.00012,<br>3: 0.00016,                                        | 2: 0.00017, 4: 0.00015,                                                                      | AZOBR_140066 |                                                                |                                        |
| AZOLI_2641 | 1: 0.00053, 2: 0.00054,<br>3: 0.00090, 4: 0.00080,                            | 1: 0.00065, 2: 0.00076,<br>3: 0.00076, 4: 0.00049,                                           | AZOBR_140072 |                                                                | 3: 0.00006,                            |
| AZOLI_2646 | 4: 0.00009,                                                                   | 4: 0.00007,                                                                                  | AZOBR_140074 | 5: 0.00018,                                                    |                                        |
| AZOLI_2649 | 1: 0.00048, 2: 0.00063,<br>4: 0.00057,                                        | 1: 0.00034, 2: 0.00033,<br>3: 0.00063, 4: 0.00036,                                           | AZOBR_140091 |                                                                |                                        |
| AZOLI_2650 | 1: 0.00014, 2: 0.00011,<br>3: 0.00028, 4: 0.00016,                            | 1: 0.00024, 2: 0.00023,<br>3: 0.00027, 4: 0.00028,                                           | AZOBR_140103 | 4: 0.00008, 5: 0.00008,                                        | 1: 0.00062, 2: 0.00021,<br>3: 0.00074, |
| AZOLI_2651 | 4: 0.00005,                                                                   |                                                                                              | AZOBR_140104 |                                                                | 3: 0.00016,                            |
| AZOLI_2652 | 2: 0.00027, 4: 0.00023,                                                       | 4: 0.00023,                                                                                  | AZOBR_140105 |                                                                |                                        |
| AZOLI_2657 |                                                                               | 4: 0.00013,                                                                                  | AZOBR_140106 |                                                                |                                        |
| AZOLI_2659 |                                                                               | 1: 0.00014,                                                                                  | AZOBR_140107 | 2: 0.00003, 3: 0.00005,                                        | 3: 0.00004,                            |
| AZOLI_2660 | 2: 0.00009, 4: 0.00015,                                                       | 3: 0.00018, 4: 0.00007,                                                                      | AZOBR_140110 |                                                                |                                        |
| AZOLI_2661 |                                                                               | 1: 0.00013, 2: 0.00013,<br>3: 0.00018, 4: 0.00011,                                           | AZOBR_140112 | 1: 0.00006,                                                    | 3: 0.00002,                            |
| AZOLI_2663 | 1: 0.00280, 2: 0.00165,<br>3: 0.00514, 4: 0.00217,                            | 1: 0.00219, 2: 0.00277,<br>3: 0.00263, 4: 0.00322,                                           | AZOBR_140113 | 1: 0.00135, 2: 0.00080, 3: 0.00115,<br>4: 0.00106, 5: 0.00050, | 1: 0.00052, 2: 0.00059,<br>3: 0.00067, |
| AZOLI_2664 | 1: 0.00015, 2: 0.00015,<br>4: 0.00019,                                        | 1: 0.00038, 2: 0.00015,<br>4: 0.00019,                                                       | AZOBR_140118 |                                                                | 3: 0.00009,                            |
| AZOLI_2665 | 2: 0.00024,                                                                   | 4: 0.00020,                                                                                  | AZOBR_140120 |                                                                | 3: 0.00012,                            |
| AZOLI_2666 | 4: 0.00009,                                                                   | 4: 0.00009,                                                                                  | AZOBR_140121 | 1: 0.00096, 2: 0.00122, 3: 0.00113,<br>4: 0.00127, 5: 0.00131, | 1: 0.00135, 2: 0.00089,<br>3: 0.00107, |
| AZOLI_2667 | 1: 0.00005,                                                                   |                                                                                              | AZOBR_140122 |                                                                | 2: 0.00009, 3: 0.00004,                |
| AZOLI_2668 | 1: 0.00020, 2: 0.00014,<br>3: 0.00029, 4: 0.00009,                            | 1: 0.00024, 2: 0.00030,<br>3: 0.00018, 4: 0.00023,                                           | AZOBR_140124 |                                                                |                                        |
| AZOLI_2679 |                                                                               | 1: 0.00010, 2: 0.00009,<br>3: 0.00051, 4: 0.00014,                                           | AZOBR_140126 | 1: 0.00020, 3: 0.00025, 4: 0.00010,<br>5: 0.00014,             | 1: 0.00010, 2: 0.00014,<br>3: 0.00018, |
| AZOLI_2683 | 2: 0.00111, 3: 0.00028,<br>4: 0.00052,                                        | 4: 0.00017,                                                                                  | AZOBR_140129 | 2: 0.00004, 3: 0.00005, 4: 0.00004,<br>5: 0.00004,             | 2: 0.00008, 3: 0.00004,                |
| AZOLI_2685 | 1: 0.00914, 2: 0.00718,<br>3: 0.01451, 4: 0.00792,                            | 1: 0.00757, 2: 0.00681,<br>3: 0.00875, 4: 0.00840,                                           | AZOBR_140131 | 1: 0.00026,                                                    | 1: 0.00011, 2: 0.00019,<br>3: 0.00037, |
| AZOLI_2686 | 1: 0.00766, 2: 0.00654,<br>3: 0.00830, 4: 0.00711,                            | 1: 0.00526, 2: 0.00725,<br>3: 0.00493, 4: 0.00601,                                           | AZOBR_140132 |                                                                |                                        |
| AZOLI_2697 |                                                                               | 1: 0.00023, 2: 0.00011,<br>3: 0.00029, 4: 0.00023,                                           | AZOBR_140133 |                                                                |                                        |
| AZOLI_2699 |                                                                               | 1: 0.00079, 2: 0.00054,<br>3: 0.00074, 4: 0.00060,                                           | AZOBR_140134 | 2: 0.00004,                                                    |                                        |
| AZOLI_2700 |                                                                               | 1: 0.00014, 4: 0.00006,                                                                      | AZOBR_140135 |                                                                | 1: 0.00185, 2: 0.00291,<br>3: 0.00111, |
| AZOLI_2703 | 1: 0.00014, 2: 0.00020,<br>4: 0.00031,                                        | 1: 0.00017, 2: 0.00011,<br>3: 0.00015, 4: 0.00022,                                           | AZOBR_140136 |                                                                | 1: 0.00021, 2: 0.00004,<br>3: 0.00010, |
| AZOLI_2705 | 1: 0.00005,                                                                   |                                                                                              | AZOBR_140137 | 2: 0.00033, 3: 0.00031, 4: 0.00119,<br>5: 0.00051,             | 1: 0.00032, 2: 0.00027,<br>3: 0.00076, |
| AZOLI_2710 | 2: 0.00018, 3: 0.00043,<br>1: 0.00036, 2: 0.00045,<br>3: 0.00012, 4: 0.00034, | 1: 0.00053, 2: 0.00056,<br>3: 0.00052, 4: 0.00057,<br>1: 0.00009, 3: 0.00009,<br>4: 0.00015, | AZOBR_140140 | 1: 0.00691, 2: 0.00885, 3: 0.00714,<br>4: 0.00663, 5: 0.00861, | 1: 0.00930, 2: 0.00853,<br>3: 0.00744, |
| AZOLI_2712 | 1: 0.00043, 2: 0.00014,<br>3: 0.00094, 4: 0.00078,                            | 1: 0.00067, 2: 0.00056,<br>3: 0.00087, 4: 0.00037,                                           | AZOBR_140149 |                                                                | 1: 0.00006, 3: 0.00006,                |
| AZOLI_2715 | 1: 0.00069, 2: 0.00048,<br>3: 0.00015, 4: 0.00027,                            | 1: 0.00059, 2: 0.00046,<br>3: 0.00034, 4: 0.00046,                                           | AZOBR_140158 | 1: 0.00005, 2: 0.00011,                                        |                                        |
| AZOLI_2717 | 1: 0.00023, 2: 0.00038,<br>3: 0.00033, 4: 0.00049,                            | 1: 0.00019, 2: 0.00037,<br>3: 0.00045, 4: 0.00057,                                           | AZOBR_140159 | 1: 0.00023, 2: 0.00014, 3: 0.00038,<br>4: 0.00031, 5: 0.00022, | 1: 0.00021, 2: 0.00021,<br>3: 0.00018, |
| AZOLI_2718 | 1: 0.00012, 2: 0.00030,<br>3: 0.00017, 4: 0.00008,                            | 1: 0.00018, 2: 0.00016,<br>3: 0.00016, 4: 0.00007,                                           | AZOBR_140160 | 1: 0.00051, 2: 0.00062, 3: 0.00055,<br>4: 0.00040, 5: 0.00031, | 1: 0.00012, 2: 0.00014,<br>3: 0.00020, |
| AZOLI_2721 | 1: 0.00012, 2: 0.00030,<br>3: 0.00017, 4: 0.00008,                            | 1: 0.00018, 2: 0.00016,<br>3: 0.00016, 4: 0.00007,                                           | AZOBR_140166 | 3: 0.00017, 4: 0.00010, 5: 0.00010,                            | 2: 0.00007,                            |
| AZOLI_2724 | 1: 0.00012, 2: 0.00036,                                                       | 1: 0.00042, 2: 0.00017,                                                                      | AZOBR_140167 | 2: 0.00010, 3: 0.00010, 4: 0.00014,                            | 1: 0.00007, 3: 0.00007,                |

|            |                                                    |                                                    |              |                                                                |                                        |
|------------|----------------------------------------------------|----------------------------------------------------|--------------|----------------------------------------------------------------|----------------------------------------|
|            | 4: 0.00036,                                        | 3: 0.00025,                                        |              | 5: 0.00008,                                                    |                                        |
| AZOLI_2726 | 1: 0.00042, 2: 0.00074,<br>4: 0.00050,             | 1: 0.00027, 2: 0.00026,<br>3: 0.00034, 4: 0.00014, | AZOBR_140169 | 1: 0.00047, 2: 0.00047, 3: 0.00067,<br>4: 0.00061, 5: 0.00024, | 1: 0.00026, 2: 0.00046,<br>3: 0.00022, |
| AZOLI_2732 |                                                    | 2: 0.00005,                                        | AZOBR_140171 |                                                                |                                        |
| AZOLI_2737 | 3: 0.00159,                                        | 1: 0.00079, 2: 0.00138,<br>3: 0.00129, 4: 0.00202, | AZOBR_140172 |                                                                |                                        |
| AZOLI_2740 | 1: 0.00073, 2: 0.00094,<br>3: 0.00102, 4: 0.00098, | 1: 0.00137, 2: 0.00071,<br>3: 0.00111, 4: 0.00081, | AZOBR_140174 | 2: 0.00013, 4: 0.00013,                                        | 3: 0.00005,                            |
| AZOLI_2742 | 4: 0.00029,                                        |                                                    | AZOBR_140175 |                                                                | 3: 0.00016,                            |
| AZOLI_2745 | 1: 0.00064, 2: 0.00060,<br>3: 0.00110, 4: 0.00102, | 1: 0.00084, 2: 0.00085,<br>3: 0.00100, 4: 0.00106, | AZOBR_140177 |                                                                | 1: 0.00009,                            |
| AZOLI_2747 | 1: 0.00018, 2: 0.00019,<br>3: 0.00011, 4: 0.00018, | 1: 0.00021, 2: 0.00015,<br>3: 0.00020, 4: 0.00020, | AZOBR_140180 | 1: 0.00004,                                                    |                                        |
| AZOLI_2748 | 3: 0.00012,                                        | 1: 0.00022, 2: 0.00034,<br>3: 0.00014, 4: 0.00007, | AZOBR_140184 | 4: 0.00029, 5: 0.00029,                                        |                                        |
| AZOLI_2751 | 2: 0.00008, 4: 0.00010,                            | 2: 0.00015, 3: 0.00008,<br>4: 0.00030,             | AZOBR_140186 | 4: 0.00020, 5: 0.00026,                                        | 1: 0.00037, 2: 0.00021,<br>3: 0.00047, |
| AZOLI_2755 | 1: 0.00007, 3: 0.00006,<br>4: 0.00006,             | 1: 0.00004, 2: 0.00006,<br>4: 0.00004,             | AZOBR_140189 | 1: 0.00035, 3: 0.00019, 4: 0.00024,                            |                                        |
| AZOLI_2757 | 1: 0.00034, 2: 0.00021,<br>3: 0.00048, 4: 0.00021, | 1: 0.00042, 2: 0.00050,<br>3: 0.00048, 4: 0.00027, | AZOBR_140191 | 1: 0.00050, 2: 0.00044, 3: 0.00018,<br>4: 0.00039, 5: 0.00044, | 1: 0.00014,                            |
| AZOLI_2758 | 1: 0.00011, 2: 0.00022,<br>3: 0.00024, 4: 0.00019, | 3: 0.00042, 4: 0.00019,                            | AZOBR_140192 | 1: 0.00009, 3: 0.00005, 4: 0.00008,<br>5: 0.00004,             | 3: 0.00004,                            |
| AZOLI_2761 | 1: 0.00039, 2: 0.00072,<br>3: 0.00093, 4: 0.00078, | 1: 0.00056, 2: 0.00073,<br>3: 0.00095, 4: 0.00071, | AZOBR_140194 |                                                                |                                        |
| AZOLI_2763 | 1: 0.00018,                                        |                                                    | AZOBR_140200 | 2: 0.00008, 4: 0.00018, 5: 0.00018,                            | 1: 0.00079, 2: 0.00045,<br>3: 0.00082, |
| AZOLI_2765 | 1: 0.00141, 2: 0.00037,<br>4: 0.00080,             | 1: 0.00031, 2: 0.00048,<br>3: 0.00073, 4: 0.00037, | AZOBR_140206 | 2: 0.00028,                                                    |                                        |
| AZOLI_2766 | 1: 0.00006,                                        | 4: 0.00005,                                        | AZOBR_140214 | 4: 0.00034,                                                    | 3: 0.00031,                            |
| AZOLI_2768 | 3: 0.00019,                                        | 1: 0.00172, 2: 0.00140,<br>3: 0.00178, 4: 0.00155, | AZOBR_140216 |                                                                | 3: 0.00017,                            |
| AZOLI_2774 | 1: 0.00085, 3: 0.00103,<br>4: 0.00063,             | 1: 0.00074, 2: 0.00095,<br>3: 0.00131,             | AZOBR_140217 | 1: 0.00026, 2: 0.00027, 3: 0.00037,<br>4: 0.00043, 5: 0.00036, | 1: 0.00014, 2: 0.00017,<br>3: 0.00016, |
| AZOLI_2776 | 1: 0.00007, 2: 0.00007,                            | 1: 0.00025, 2: 0.00014,<br>3: 0.00034, 4: 0.00012, | AZOBR_140219 |                                                                |                                        |
| AZOLI_2777 | 1: 0.00015, 2: 0.00009,<br>4: 0.00008,             | 2: 0.00006, 4: 0.00008,                            | AZOBR_140220 | 4: 0.00003,                                                    | 1: 0.00001, 2: 0.00002,<br>3: 0.00003, |
| AZOLI_2778 |                                                    | 1: 0.00009,                                        | AZOBR_140222 |                                                                |                                        |
| AZOLI_2785 | 1: 0.00102, 2: 0.00066,<br>3: 0.00144, 4: 0.00044, | 1: 0.00074, 2: 0.00100,<br>3: 0.00071, 4: 0.00101, | AZOBR_140224 | 4: 0.00010,                                                    | 1: 0.00009, 2: 0.00014,                |
| AZOLI_2786 | 4: 0.00003,                                        | 3: 0.00004, 4: 0.00005,                            | AZOBR_140230 | 4: 0.00036, 5: 0.00022,                                        | 3: 0.00013,                            |
| AZOLI_2787 |                                                    | 1: 0.00029, 2: 0.00048,<br>3: 0.00046, 4: 0.00024, | AZOBR_140234 |                                                                |                                        |
| AZOLI_2788 |                                                    | 1: 0.00140, 2: 0.00148,<br>3: 0.00116, 4: 0.00128, | AZOBR_140235 | 1: 0.00128, 2: 0.00253, 3: 0.00118,<br>4: 0.00252, 5: 0.00218, | 1: 0.00247, 2: 0.00252,<br>3: 0.00227, |
| AZOLI_2793 | 1: 0.00187, 2: 0.00177,<br>3: 0.00080, 4: 0.00139, | 1: 0.00095, 2: 0.00091,<br>3: 0.00094, 4: 0.00093, | AZOBR_140238 | 1: 0.00071, 2: 0.00063, 3: 0.00104,<br>4: 0.00119, 5: 0.00105, | 1: 0.00039, 2: 0.00044,<br>3: 0.00019, |
| AZOLI_2794 | 1: 0.00048, 2: 0.00137,<br>3: 0.00146, 4: 0.00206, | 1: 0.00339, 2: 0.00233,<br>3: 0.00325, 4: 0.00379, | AZOBR_140239 | 1: 0.00023, 2: 0.00079, 3: 0.00034,<br>4: 0.00053, 5: 0.00044, | 1: 0.00034, 2: 0.00024,<br>3: 0.00039, |
| AZOLI_2795 | 1: 0.00009, 2: 0.00006,<br>3: 0.00187, 4: 0.00005, | 1: 0.00663, 2: 0.00608,<br>3: 0.00675, 4: 0.00644, | AZOBR_140240 | 4: 0.00013,                                                    | 3: 0.00012,                            |
| AZOLI_2801 | 3: 0.00024,                                        |                                                    | AZOBR_140242 | 2: 0.00026, 3: 0.00019, 5: 0.00010,                            | 1: 0.00029, 2: 0.00016,<br>3: 0.00042, |
| AZOLI_2807 | 1: 0.00011, 2: 0.00011,<br>4: 0.00046,             | 1: 0.00049, 2: 0.00037,<br>3: 0.00029, 4: 0.00019, | AZOBR_140243 |                                                                | 1: 0.00015, 2: 0.00006,<br>3: 0.00012, |
| AZOLI_2811 | 1: 0.00061, 2: 0.00031,<br>3: 0.00025, 4: 0.00064, | 1: 0.00040, 2: 0.00047,<br>3: 0.00024, 4: 0.00034, | AZOBR_140244 | 1: 0.00019, 4: 0.00019,                                        | 1: 0.00018, 3: 0.00035,                |
| AZOLI_2812 | 1: 0.00048, 2: 0.00060,<br>3: 0.00086, 4: 0.00049, | 1: 0.00056, 2: 0.00028,<br>3: 0.00033, 4: 0.00039, | AZOBR_140245 | 1: 0.00053, 2: 0.00020, 3: 0.00046,<br>4: 0.00026, 5: 0.00021, | 1: 0.00024, 2: 0.00039,<br>3: 0.00028, |
| AZOLI_2817 | 1: 0.00078, 2: 0.00026,                            | 1: 0.00066,                                        | AZOBR_140248 |                                                                |                                        |
| AZOLI_2819 | 4: 0.00005,                                        | 3: 0.00009, 4: 0.00013,                            | AZOBR_140249 |                                                                |                                        |
| AZOLI_2820 | 1: 0.00192, 2: 0.00156,<br>3: 0.00435, 4: 0.00075, | 1: 0.00082, 2: 0.00097,<br>3: 0.00066, 4: 0.00080, | AZOBR_140251 | 1: 0.00022, 4: 0.00020, 5: 0.00020,                            | 3: 0.00022,                            |
| AZOLI_2821 |                                                    | 1: 0.00065, 2: 0.00036,<br>3: 0.00029, 4: 0.00032, | AZOBR_140253 |                                                                | 2: 0.00052, 3: 0.00044,                |
| AZOLI_2825 | 2: 0.00006, 4: 0.00010,                            | 1: 0.00023, 2: 0.00020,<br>3: 0.00019, 4: 0.00022, | AZOBR_140254 | 5: 0.00006,                                                    | 3: 0.00008,                            |
| AZOLI_2829 | 1: 0.00020, 2: 0.00016,<br>3: 0.00086, 4: 0.00010, | 1: 0.00164, 2: 0.00186,<br>3: 0.00170, 4: 0.00182, | AZOBR_140255 | 1: 0.00013, 3: 0.00008, 4: 0.00015,                            | 3: 0.00011,                            |
| AZOLI_2836 | 2: 0.00026, 4: 0.00067,                            | 1: 0.00079, 3: 0.00070,<br>4: 0.00067,             | AZOBR_140256 | 1: 0.00065, 2: 0.00023, 3: 0.00022,<br>4: 0.00045, 5: 0.00027, | 1: 0.00108, 2: 0.00076,<br>3: 0.00072, |
| AZOLI_2844 |                                                    | 4: 0.00011,                                        | AZOBR_140257 | 4: 0.00012,                                                    | 3: 0.00027,                            |
| AZOLI_2845 | 4: 0.00010,                                        |                                                    | AZOBR_140258 |                                                                |                                        |
| AZOLI_2846 | 4: 0.00005,                                        |                                                    | AZOBR_140261 | 1: 0.00158, 2: 0.00194, 3: 0.00127,<br>4: 0.00109, 5: 0.00176, | 1: 0.00163, 2: 0.00147,<br>3: 0.00208, |
| AZOLI_2848 | 2: 0.00006, 4: 0.00005,                            | 1: 0.00006, 3: 0.00006,<br>4: 0.00010,             | AZOBR_140262 | 1: 0.00008, 2: 0.00005, 3: 0.00015,<br>4: 0.00020, 5: 0.00007, | 2: 0.00004, 3: 0.00003,                |
| AZOLI_2849 | 2: 0.00010, 4: 0.00006,                            | 3: 0.00005, 4: 0.00006,                            | AZOBR_140263 | 1: 0.00327, 2: 0.00346, 3: 0.00200,<br>4: 0.00171, 5: 0.00198, | 1: 0.00067, 2: 0.00105,<br>3: 0.00106, |
| AZOLI_2850 | 1: 0.00004, 2: 0.00009,<br>3: 0.00007, 4: 0.00018, | 1: 0.00025, 2: 0.00034,<br>3: 0.00063, 4: 0.00039, | AZOBR_140264 |                                                                |                                        |
| AZOLI_2853 | 1: 0.00031, 2: 0.00045,<br>4: 0.00066,             | 2: 0.00017,                                        | AZOBR_140265 | 1: 0.00016, 2: 0.00028, 3: 0.00033,<br>4: 0.00011, 5: 0.00022, | 1: 0.00010, 3: 0.00034,                |
| AZOLI_2854 | 1: 0.00015, 2: 0.00062,<br>3: 0.00140, 4: 0.00105, | 1: 0.00178, 2: 0.00097,<br>3: 0.00197, 4: 0.00145, | AZOBR_140266 | 1: 0.00024, 2: 0.00016, 3: 0.00030,<br>4: 0.00025, 5: 0.00057, |                                        |
| AZOLI_2857 | 1: 0.00006, 2: 0.00024,<br>4: 0.00018,             | 1: 0.00012, 2: 0.00015,<br>4: 0.00013,             | AZOBR_140267 | 1: 0.00066, 2: 0.00097, 3: 0.00084,<br>4: 0.00060, 5: 0.00064, |                                        |
| AZOLI_2859 |                                                    | 2: 0.00006, 3: 0.00012,                            | AZOBR_140268 | 1: 0.00023, 2: 0.00027, 3: 0.00024,<br>4: 0.00032, 5: 0.00026, |                                        |

|            |                                                                                              |                                                    |              |                                                                |                                                                   |
|------------|----------------------------------------------------------------------------------------------|----------------------------------------------------|--------------|----------------------------------------------------------------|-------------------------------------------------------------------|
| AZOLI_2860 | 1: 0.00008, 2: 0.00006,<br>4: 0.00009,                                                       |                                                    | AZOBR_140269 | 1: 0.00669, 2: 0.00628, 3: 0.00483,<br>4: 0.00391, 5: 0.00517, | 1: 0.00420, 2: 0.00487,<br>3: 0.00337,                            |
| AZOLI_2863 | 1: 0.00050, 2: 0.00064,<br>3: 0.00120, 4: 0.00047,                                           | 1: 0.00128, 2: 0.00218,<br>3: 0.00139, 4: 0.00143, | AZOBR_140271 | 3: 0.00010, 4: 0.00020, 5: 0.00012,                            | 3: 0.00025,                                                       |
| AZOLI_2869 | 4: 0.00011,                                                                                  |                                                    | AZOBR_140273 |                                                                | 3: 0.00013,                                                       |
| AZOLI_2870 | 1: 0.00089, 2: 0.00143,<br>3: 0.00094, 4: 0.00128,                                           | 1: 0.00128, 2: 0.00094,<br>3: 0.00088, 4: 0.00109, | AZOBR_140274 |                                                                |                                                                   |
| AZOLI_2871 | 1: 0.00312, 2: 0.00402,<br>3: 0.00439, 4: 0.00294,                                           | 1: 0.00152, 2: 0.00321,<br>3: 0.00229, 4: 0.00234, | AZOBR_140277 | 3: 0.00048, 5: 0.00023,                                        | 3: 0.00021,                                                       |
| AZOLI_2872 | 1: 0.00008, 2: 0.00008,<br>3: 0.00018, 4: 0.00009,                                           | 1: 0.00013, 2: 0.00012,<br>3: 0.00018, 4: 0.00018, | AZOBR_140279 | 1: 0.00010, 2: 0.00013, 3: 0.00021,<br>4: 0.00014, 5: 0.00021, | 3: 0.00009,<br>1: 0.00030, 2: 0.00068,<br>3: 0.00024,             |
| AZOLI_2873 | 1: 0.00013, 2: 0.00017,<br>3: 0.00018, 4: 0.00026,                                           | 1: 0.00017, 2: 0.00013,<br>3: 0.00014, 4: 0.00011, | AZOBR_140281 | 3: 0.00020, 4: 0.00011,                                        |                                                                   |
| AZOLI_2874 | 1: 0.00039, 2: 0.00091,<br>4: 0.00071,                                                       | 1: 0.00075, 2: 0.00050,<br>3: 0.00046, 4: 0.00037, | AZOBR_140285 | 1: 0.00025, 2: 0.00011, 3: 0.00010,<br>4: 0.00023, 5: 0.00030, | 2: 0.00018, 3: 0.00006,                                           |
| AZOLI_2876 | 1: 0.00006, 3: 0.00014,<br>4: 0.00008,                                                       |                                                    | AZOBR_140288 |                                                                |                                                                   |
| AZOLI_2877 | 1: 0.00038, 2: 0.00038,<br>4: 0.00019,                                                       | 1: 0.00022, 2: 0.00011,<br>3: 0.00018, 4: 0.00014, | AZOBR_140290 |                                                                |                                                                   |
| AZOLI_2881 | 1: 0.00063, 2: 0.00025,<br>3: 0.00039, 4: 0.00051,                                           | 1: 0.00053, 2: 0.00103,<br>3: 0.00060, 4: 0.00064, | AZOBR_140291 |                                                                |                                                                   |
| AZOLI_2889 | 1: 0.00021, 3: 0.00015,<br>4: 0.00012,                                                       | 1: 0.00018, 2: 0.00022,<br>3: 0.00011, 4: 0.00014, | AZOBR_140292 |                                                                |                                                                   |
| AZOLI_2889 | 1: 0.00038, 2: 0.00052,<br>3: 0.00036, 4: 0.00050,                                           | 1: 0.00013, 2: 0.00044,<br>3: 0.00021, 4: 0.00055, | AZOBR_140297 |                                                                |                                                                   |
| AZOLI_2890 | 1: 0.00016, 2: 0.00017,<br>3: 0.00010, 4: 0.00021,                                           | 1: 0.00023, 2: 0.00025,<br>3: 0.00018, 4: 0.00021, | AZOBR_140302 |                                                                |                                                                   |
| AZOLI_2894 | 3: 0.00014,                                                                                  | 2: 0.00007, 3: 0.00013,<br>4: 0.00006,             | AZOBR_140303 |                                                                |                                                                   |
| AZOLI_2896 |                                                                                              | 3: 0.00014,                                        | AZOBR_140305 |                                                                |                                                                   |
| AZOLI_2898 |                                                                                              | 2: 0.00013,                                        | AZOBR_140306 |                                                                | 3: 0.00015,                                                       |
| AZOLI_2899 | 1: 0.00014, 2: 0.00014,<br>3: 0.00032, 4: 0.00008,<br>2: 0.00030, 3: 0.00247,<br>4: 0.00034, | 2: 0.00018, 3: 0.00020,                            | AZOBR_140307 | 1: 0.00023, 2: 0.00041, 4: 0.00040,<br>5: 0.00024,             | 1: 0.00037, 2: 0.00067,<br>3: 0.00029,                            |
| AZOLI_2901 |                                                                                              |                                                    | AZOBR_140308 |                                                                | 3: 0.00005,                                                       |
| AZOLI_2902 | 1: 0.00260, 2: 0.00206,<br>3: 0.00255, 4: 0.00107,                                           | 1: 0.00402, 2: 0.00365,<br>3: 0.00304, 4: 0.00371, | AZOBR_140309 | 1: 0.00068, 2: 0.00049, 3: 0.00061,<br>4: 0.00039, 5: 0.00036, | 1: 0.00004, 2: 0.00025,<br>3: 0.00017,                            |
| AZOLI_2903 | 4: 0.00004,                                                                                  |                                                    | AZOBR_140310 | 1: 0.00088, 2: 0.00082, 3: 0.00098,<br>4: 0.00108, 5: 0.00090, | 1: 0.00063, 2: 0.00076,<br>3: 0.00086,                            |
| AZOLI_2905 | 1: 0.00177, 2: 0.00272,<br>3: 0.00353, 4: 0.00258,                                           | 1: 0.00149, 2: 0.00203,<br>3: 0.00138, 4: 0.00100, | AZOBR_140311 | 1: 0.00004,                                                    | 2: 0.00008,                                                       |
| AZOLI_2908 |                                                                                              | 1: 0.00007, 4: 0.00009,                            | AZOBR_150005 |                                                                |                                                                   |
| AZOLI_2909 | 1: 0.00011, 2: 0.00009,<br>3: 0.00014, 4: 0.00007,                                           | 1: 0.00022, 2: 0.00025,<br>3: 0.00024, 4: 0.00028, | AZOBR_150011 | 1: 0.00239, 2: 0.00334, 3: 0.00373,<br>4: 0.00267, 5: 0.00281, | 1: 0.00038, 2: 0.00065,<br>3: 0.00074,                            |
| AZOLI_2918 | 1: 0.00020, 2: 0.00017,                                                                      |                                                    | AZOBR_150011 | 1: 0.00308, 2: 0.00352, 3: 0.00343,<br>4: 0.00313, 5: 0.00341, | 1: 0.00105, 2: 0.00142,<br>3: 0.00156,                            |
| AZOLI_2920 | 1: 0.00171, 2: 0.00097,<br>3: 0.00016, 4: 0.00045,                                           | 1: 0.00056, 2: 0.00029,<br>3: 0.00048, 4: 0.00035, | AZOBR_150011 | 1: 0.00301, 2: 0.00331, 3: 0.00288,<br>4: 0.00314, 5: 0.00397, | 1: 0.00152, 2: 0.00146,<br>3: 0.00233,                            |
| AZOLI_2921 | 1: 0.00030,                                                                                  |                                                    | AZOBR_150016 | 1: 0.00039, 2: 0.00017, 3: 0.00063,<br>4: 0.00054, 5: 0.00048, | 1: 0.00030, 2: 0.00026,<br>3: 0.00049,                            |
| AZOLI_2925 | 1: 0.00008, 4: 0.00009,                                                                      | 3: 0.00011, 4: 0.00009,                            | AZOBR_150017 | 3: 0.00012, 4: 0.00014, 5: 0.00024,                            | 2: 0.00010, 3: 0.00009,<br>1: 0.00028, 2: 0.00026,<br>3: 0.00033, |
| AZOLI_2926 | 3: 0.00029, 4: 0.00021,                                                                      | 1: 0.00014, 2: 0.00010,<br>3: 0.00026, 4: 0.00015, | AZOBR_150020 | 3: 0.00011, 4: 0.00012, 5: 0.00006,                            |                                                                   |
| AZOLI_2929 | 1: 0.00032, 2: 0.00041,<br>3: 0.00017, 4: 0.00049,                                           | 1: 0.00045, 2: 0.00051,<br>3: 0.00052, 4: 0.00021, | AZOBR_150021 |                                                                |                                                                   |
| AZOLI_2930 | 1: 0.00020, 2: 0.00031,<br>4: 0.00010,                                                       | 1: 0.00011, 2: 0.00016,<br>3: 0.00012, 4: 0.00010, | AZOBR_150022 | 1: 0.00116, 2: 0.00116, 3: 0.00131,<br>4: 0.00106, 5: 0.00096, | 1: 0.00054, 2: 0.00079,<br>3: 0.00091,                            |
| AZOLI_2932 | 1: 0.00082, 2: 0.00099,<br>4: 0.00226,                                                       | 1: 0.00033, 4: 0.00028,                            | AZOBR_150023 | 1: 0.00153, 2: 0.00144, 3: 0.00139,<br>4: 0.00141, 5: 0.00130, | 1: 0.00075, 2: 0.00108,<br>3: 0.00067,                            |
| AZOLI_2934 | 1: 0.00006, 2: 0.00014,<br>3: 0.00008, 4: 0.00010,                                           | 1: 0.00056, 2: 0.00022,<br>3: 0.00042, 4: 0.00034, | AZOBR_150025 |                                                                |                                                                   |
| AZOLI_2935 | 1: 0.00037, 2: 0.00068,<br>3: 0.00053, 4: 0.00032,                                           | 1: 0.00053, 2: 0.00022,<br>4: 0.00039,             | AZOBR_150026 |                                                                |                                                                   |
| AZOLI_2940 | 3: 0.00009,                                                                                  |                                                    | AZOBR_150028 | 2: 0.00007, 3: 0.00019, 4: 0.00013,<br>5: 0.00006,             | 1: 0.00004, 2: 0.00006,                                           |
| AZOLI_2944 | 1: 0.00027, 2: 0.00024,<br>3: 0.00029, 4: 0.00015,                                           | 1: 0.00030, 2: 0.00038,<br>3: 0.00016, 4: 0.00026, | AZOBR_150029 |                                                                |                                                                   |
| AZOLI_2947 | 1: 0.00011,                                                                                  |                                                    | AZOBR_150030 | 2: 0.00031, 3: 0.00040, 4: 0.00024,<br>5: 0.00040,             | 2: 0.00017, 3: 0.00036,                                           |
| AZOLI_2949 | 1: 0.00037, 2: 0.00088,<br>4: 0.00129,                                                       | 1: 0.00189, 2: 0.00182,<br>3: 0.00200, 4: 0.00172, | AZOBR_150031 | 1: 0.00012, 2: 0.00038, 3: 0.00020,<br>4: 0.00041, 5: 0.00022, | 1: 0.00048, 2: 0.00046,<br>3: 0.00027,                            |
| AZOLI_2950 | 4: 0.00010,                                                                                  |                                                    | AZOBR_150033 |                                                                | 2: 0.00026, 3: 0.00045,                                           |
| AZOLI_2953 | 1: 0.00009, 2: 0.00009,<br>3: 0.00010, 4: 0.00006,                                           | 1: 0.00011, 2: 0.00009,<br>3: 0.00008, 4: 0.00008, | AZOBR_150034 |                                                                |                                                                   |
| AZOLI_2957 |                                                                                              | 4: 0.00007,                                        | AZOBR_150035 |                                                                | 3: 0.00009,                                                       |
| AZOLI_2958 | 4: 0.00005,                                                                                  | 4: 0.00003,                                        | AZOBR_150037 | 1: 0.00013, 2: 0.00008, 4: 0.00009,                            |                                                                   |
| AZOLI_2959 | 1: 0.00023, 4: 0.00039,                                                                      | 4: 0.00029,                                        | AZOBR_150040 | 4: 0.00024,                                                    |                                                                   |
| AZOLI_2960 | 1: 0.00146, 2: 0.00078,<br>3: 0.00084, 4: 0.00118,                                           | 1: 0.00130, 2: 0.00151,<br>3: 0.00156, 4: 0.00126, | AZOBR_150042 | 1: 0.00290, 2: 0.00328, 3: 0.00278,<br>4: 0.00212, 5: 0.00275, | 1: 0.00046, 2: 0.00040,<br>3: 0.00090,                            |
| AZOLI_2961 | 2: 0.00010,                                                                                  |                                                    | AZOBR_150047 |                                                                |                                                                   |
| AZOLI_2962 | 1: 0.00014,                                                                                  |                                                    | AZOBR_150048 | 1: 0.00015, 2: 0.00014, 3: 0.00011,                            | 1: 0.00012, 2: 0.00013,<br>3: 0.00012,                            |
| AZOLI_2966 | 1: 0.00034, 2: 0.00040,<br>3: 0.00048, 4: 0.00013,                                           | 1: 0.00025, 2: 0.00014,<br>3: 0.00016, 4: 0.00013, | AZOBR_150060 |                                                                |                                                                   |
| AZOLI_2969 | 1: 0.00004, 2: 0.00006,<br>3: 0.00016, 4: 0.00013,                                           | 1: 0.00023, 2: 0.00027,<br>3: 0.00042, 4: 0.00039, | AZOBR_150061 |                                                                |                                                                   |
| AZOLI_2971 | 1: 0.00008, 2: 0.00004,<br>4: 0.00007,                                                       | 1: 0.00018, 2: 0.00015,<br>3: 0.00021, 4: 0.00019, | AZOBR_150062 | 1: 0.00012, 2: 0.00011, 3: 0.00021,<br>4: 0.00019, 5: 0.00019, | 1: 0.00031, 2: 0.00018,<br>3: 0.00038,                            |
| AZOLI_2973 | 1: 0.00493, 2: 0.00820,<br>3: 0.00041, 4: 0.00425,                                           |                                                    | AZOBR_150063 | 5: 0.00017,                                                    | 1: 0.00011, 2: 0.00024,                                           |

|            |                                                    |                                                                               |              |                                                                |                                        |
|------------|----------------------------------------------------|-------------------------------------------------------------------------------|--------------|----------------------------------------------------------------|----------------------------------------|
| AZOLI_2980 |                                                    | 2: 0.00007, 4: 0.00013,                                                       | AZOBR_150065 |                                                                |                                        |
| AZOLI_2982 | 2: 0.00075, 3: 0.00047,<br>4: 0.00078,             | 1: 0.00100, 2: 0.00105,<br>3: 0.00142, 4: 0.00078,                            | AZOBR_150072 | 1: 0.00020, 3: 0.00013,                                        |                                        |
| AZOLI_2983 | 1: 0.00067, 2: 0.00027,<br>4: 0.00046,             | 1: 0.00055, 2: 0.00053,<br>3: 0.00072, 4: 0.00047,                            | AZOBR_150074 | 5: 0.00014,                                                    | 3: 0.00005,                            |
| AZOLI_2985 | 1: 0.00009, 2: 0.00023,<br>4: 0.00016,             |                                                                               | AZOBR_150075 | 3: 0.00013, 4: 0.00010, 5: 0.00007,                            |                                        |
| AZOLI_2987 |                                                    | 2: 0.00006, 4: 0.00006,                                                       | AZOBR_150077 |                                                                |                                        |
| AZOLI_2988 | 4: 0.00022,                                        | 4: 0.00011,                                                                   | AZOBR_150079 | 1: 0.00037, 2: 0.00030, 3: 0.00026,<br>4: 0.00037, 5: 0.00030, | 1: 0.00019, 2: 0.00015,<br>3: 0.00019, |
| AZOLI_2990 | 1: 0.00131, 2: 0.00141,<br>3: 0.00275, 4: 0.00206, | 1: 0.00149, 2: 0.00164,<br>3: 0.00217, 4: 0.00176,                            | AZOBR_150080 | 1: 0.00011, 2: 0.00006, 3: 0.00006,<br>4: 0.00010, 5: 0.00007, | 3: 0.00007,                            |
| AZOLI_2991 | 1: 0.00027, 2: 0.00051,<br>3: 0.00021, 4: 0.00061, | 1: 0.00024, 2: 0.00032,<br>3: 0.00006, 4: 0.00020,                            | AZOBR_150084 | 3: 0.00016, 4: 0.00006,                                        |                                        |
| AZOLI_2994 | 1: 0.00008,                                        |                                                                               | AZOBR_150085 |                                                                |                                        |
| AZOLI_2995 | 4: 0.00022,                                        |                                                                               | AZOBR_150088 | 1: 0.00026, 2: 0.00009, 3: 0.00022,<br>4: 0.00007,             | 3: 0.00006,                            |
| AZOLI_2997 | 1: 0.00006, 2: 0.00016,<br>4: 0.00008,             |                                                                               | AZOBR_150090 | 1: 0.00032, 2: 0.00057, 3: 0.00035,<br>4: 0.00014, 5: 0.00022, | 1: 0.00039, 2: 0.00047,<br>3: 0.00040, |
| AZOLI_2999 | 4: 0.00014,                                        | 1: 0.00011, 3: 0.00024,<br>4: 0.00019,                                        | AZOBR_150091 | 4: 0.00011,                                                    | 1: 0.00010, 3: 0.00014,                |
| AZOLI_3000 | 4: 0.00023,                                        |                                                                               | AZOBR_150093 | 5: 0.00011,                                                    | 1: 0.00015, 3: 0.00028,                |
| AZOLI_3004 | 4: 0.00017,                                        |                                                                               | AZOBR_150094 |                                                                |                                        |
| AZOLI_3008 |                                                    | 2: 0.00009, 4: 0.00006,                                                       | AZOBR_150096 |                                                                |                                        |
| AZOLI_3014 | 1: 0.00054, 2: 0.00030,<br>3: 0.00021, 4: 0.00039, | 1: 0.00005, 2: 0.00007,<br>3: 0.00005, 4: 0.00008,                            | AZOBR_150100 |                                                                | 3: 0.00009,                            |
| AZOLI_3015 | 1: 0.00080, 2: 0.00053,<br>4: 0.00053,             | 1: 0.00024, 2: 0.00037,<br>3: 0.00015, 4: 0.00020,                            | AZOBR_150105 |                                                                | 2: 0.00009, 3: 0.00020,                |
| AZOLI_3016 | 1: 0.00040, 2: 0.00023,<br>3: 0.00032, 4: 0.00049, | 1: 0.00029, 2: 0.00011,<br>3: 0.00018, 4: 0.00029,                            | AZOBR_150107 | 1: 0.00048, 2: 0.00063, 3: 0.00034,<br>4: 0.00049, 5: 0.00022, | 1: 0.00036, 2: 0.00023,<br>3: 0.00015, |
| AZOLI_3019 | 1: 0.00022, 2: 0.00023,<br>3: 0.00047, 4: 0.00052, | 1: 0.00015, 2: 0.00029,<br>3: 0.00008, 4: 0.00026,                            | AZOBR_150110 | 1: 0.00124, 2: 0.00254, 3: 0.00198,<br>4: 0.00203, 5: 0.00211, | 1: 0.00175, 2: 0.00138,<br>3: 0.00161, |
| AZOLI_3024 |                                                    | 1: 0.00057, 4: 0.00049,<br>1: 0.00097, 2: 0.00120,<br>3: 0.00132, 4: 0.00082, | AZOBR_150112 | 1: 0.00063, 2: 0.00056, 3: 0.00043,<br>4: 0.00104, 5: 0.00052, | 1: 0.00194, 2: 0.00230,<br>3: 0.00133, |
| AZOLI_3025 | 1: 0.00095, 2: 0.00083,                            |                                                                               | AZOBR_150114 |                                                                |                                        |
| AZOLI_3026 | 4: 0.00003,                                        | 4: 0.00003,                                                                   | AZOBR_150126 | 1: 0.00034, 3: 0.00015, 4: 0.00047,<br>5: 0.00018,             | 1: 0.00011, 2: 0.00012,<br>3: 0.00032, |
| AZOLI_3027 | 1: 0.00027,                                        |                                                                               | AZOBR_150128 | 1: 0.00024, 2: 0.00026, 3: 0.00026,<br>4: 0.00034, 5: 0.00026, | 2: 0.00008, 3: 0.00014,                |
| AZOLI_3028 | 1: 0.00007, 2: 0.00014,<br>4: 0.00012,             | 1: 0.00025, 2: 0.00007,<br>3: 0.00015, 4: 0.00009,                            | AZOBR_150129 | 3: 0.00006,                                                    |                                        |
| AZOLI_3031 | 1: 0.00008, 3: 0.00016,                            |                                                                               | AZOBR_150130 | 1: 0.00180, 2: 0.00184, 3: 0.00194,<br>4: 0.00216, 5: 0.00222, | 1: 0.00176, 2: 0.00124,<br>3: 0.00165, |
| AZOLI_3032 |                                                    | 1: 0.00011,                                                                   | AZOBR_150132 | 1: 0.00171, 2: 0.00105, 3: 0.00145,<br>4: 0.00112, 5: 0.00128, | 1: 0.00026, 2: 0.00054,<br>3: 0.00042, |
| AZOLI_3033 | 1: 0.00032,                                        | 1: 0.00012, 2: 0.00028,<br>3: 0.00013, 4: 0.00014,                            | AZOBR_150133 |                                                                |                                        |
| AZOLI_3035 | 1: 0.00035, 2: 0.00016,<br>4: 0.00022,             | 1: 0.00010, 2: 0.00028,<br>4: 0.00014,                                        | AZOBR_150137 | 3: 0.00006, 4: 0.00022, 5: 0.00007,                            | 1: 0.00011, 2: 0.00005,<br>3: 0.00020, |
| AZOLI_3036 |                                                    | 4: 0.00005,                                                                   | AZOBR_150139 | 1: 0.00026, 2: 0.00023, 3: 0.00033,<br>4: 0.00035, 5: 0.00044, | 1: 0.00041, 2: 0.00019,<br>3: 0.00056, |
| AZOLI_3038 | 1: 0.00092, 2: 0.00052,<br>3: 0.00038, 4: 0.00072, | 1: 0.00055, 2: 0.00048,<br>3: 0.00035, 4: 0.00068,                            | AZOBR_150140 | 1: 0.00014, 2: 0.00033, 3: 0.00032,<br>4: 0.00035, 5: 0.00029, | 3: 0.00023,                            |
| AZOLI_3039 | 1: 0.00056, 2: 0.00042,<br>4: 0.00054,             | 1: 0.00042, 2: 0.00061,<br>3: 0.00030, 4: 0.00036,                            | AZOBR_150146 | 1: 0.00057, 4: 0.00026, 5: 0.00033,                            | 2: 0.00041, 3: 0.00012,                |
| AZOLI_3042 | 4: 0.00022,                                        | 3: 0.00016, 4: 0.00009,                                                       | AZOBR_150147 | 4: 0.00006, 5: 0.00006,                                        | 3: 0.00008,                            |
| AZOLI_3044 | 1: 0.00018, 2: 0.00018,<br>3: 0.00014, 4: 0.00035, | 2: 0.00010, 3: 0.00014,<br>4: 0.00007,                                        | AZOBR_150149 |                                                                | 2: 0.00013,                            |
| AZOLI_3045 | 4: 0.00026,                                        |                                                                               | AZOBR_150150 | 1: 0.00103, 2: 0.00123, 3: 0.00064,<br>4: 0.00054, 5: 0.00066, | 1: 0.00030, 2: 0.00055,<br>3: 0.00060, |
| AZOLI_3048 | 1: 0.00026, 2: 0.00021,<br>4: 0.00018,             | 1: 0.00016, 2: 0.00040,<br>3: 0.00028,                                        | AZOBR_150151 |                                                                | 1: 0.00037, 3: 0.00029,                |
| AZOLI_3049 | 1: 0.00058, 2: 0.00032,<br>4: 0.00059,             | 1: 0.00011, 4: 0.00014,                                                       | AZOBR_150153 | 5: 0.00016,                                                    |                                        |
| AZOLI_3050 |                                                    | 4: 0.00011,                                                                   | AZOBR_150156 |                                                                |                                        |
| AZOLI_3051 | 1: 0.00018, 3: 0.00039,<br>4: 0.00016,             | 1: 0.00042, 2: 0.00022,<br>3: 0.00020, 4: 0.00047,                            | AZOBR_150158 | 2: 0.00048, 3: 0.00047, 4: 0.00028,                            | 1: 0.00018, 2: 0.00150,<br>3: 0.00026, |
| AZOLI_3052 | 1: 0.00013, 2: 0.00026,<br>3: 0.00060, 4: 0.00026, | 1: 0.00022, 2: 0.00025,<br>3: 0.00023, 4: 0.00030,                            | AZOBR_150160 |                                                                | 1: 0.00017, 2: 0.00004,<br>3: 0.00005, |
| AZOLI_3053 | 4: 0.00033,                                        |                                                                               | AZOBR_150164 | 1: 0.00048, 2: 0.00014, 3: 0.00027,                            | 1: 0.00015, 2: 0.00012,<br>3: 0.00010, |
| AZOLI_3054 | 1: 0.00074, 2: 0.00122,<br>3: 0.00222, 4: 0.00112, | 1: 0.00179, 2: 0.00154,<br>3: 0.00139, 4: 0.00152,                            | AZOBR_150169 | 2: 0.00018, 3: 0.00013, 4: 0.00018,<br>5: 0.00007,             |                                        |
| AZOLI_3067 | 1: 0.00009, 2: 0.00028,<br>4: 0.00016,             | 1: 0.00024, 3: 0.00015,<br>4: 0.00016,                                        | AZOBR_150171 | 1: 0.00005, 2: 0.00022, 3: 0.00015,<br>4: 0.00038, 5: 0.00028, | 1: 0.00017, 2: 0.00011,<br>3: 0.00033, |
| AZOLI_3068 | 1: 0.00130, 2: 0.00140,<br>3: 0.00127, 4: 0.00168, | 1: 0.00132, 2: 0.00135,<br>3: 0.00126, 4: 0.00140,                            | AZOBR_150173 | 1: 0.00065, 2: 0.00061, 3: 0.00062,<br>4: 0.00067, 5: 0.00067, | 1: 0.00018, 2: 0.00032,<br>3: 0.00048, |
| AZOLI_3070 | 1: 0.00470, 2: 0.00693,<br>3: 0.00770, 4: 0.00373, | 1: 0.00413, 2: 0.00335,<br>3: 0.00314, 4: 0.00406,                            | AZOBR_150176 |                                                                |                                        |
| AZOLI_3071 | 1: 0.00018, 2: 0.00018,<br>4: 0.00044,             | 3: 0.00012, 4: 0.00012,                                                       | AZOBR_150180 | 1: 0.00073, 4: 0.00030, 5: 0.00020,                            | 1: 0.00019, 2: 0.00032,                |
| AZOLI_3072 | 1: 0.00046, 2: 0.00029,<br>4: 0.00064,             | 1: 0.00012, 2: 0.00028,<br>3: 0.00012, 4: 0.00010,                            | AZOBR_150191 | 3: 0.00003,                                                    | 1: 0.00002, 2: 0.00002,<br>3: 0.00003, |
| AZOLI_3075 | 1: 0.00041, 2: 0.00048,<br>3: 0.00067, 4: 0.00128, | 1: 0.00123, 2: 0.00204,<br>3: 0.00152, 4: 0.00117,                            | AZOBR_150194 | 5: 0.00008,                                                    | 1: 0.00008, 2: 0.00009,<br>3: 0.00011, |
| AZOLI_3075 | 1: 0.00082, 2: 0.00107,<br>3: 0.00133, 4: 0.00086, | 1: 0.00063, 2: 0.00083,<br>3: 0.00065, 4: 0.00073,                            | AZOBR_150195 |                                                                |                                        |
| AZOLI_3076 | 1: 0.00043, 2: 0.00026,<br>4: 0.00055,             | 1: 0.00035, 2: 0.00033,<br>3: 0.00041, 4: 0.00033,                            | AZOBR_150196 | 1: 0.00009, 4: 0.00013, 5: 0.00010,                            | 1: 0.00009, 3: 0.00014,                |

|              |                                                 |                                                 |              |                                                             |                                     |
|--------------|-------------------------------------------------|-------------------------------------------------|--------------|-------------------------------------------------------------|-------------------------------------|
| AZOLI_3077   | 1: 0.00133, 2: 0.00119, 3: 0.00089, 4: 0.00146, | 1: 0.00093, 2: 0.00070, 3: 0.00091, 4: 0.00126, | AZOBR_150197 |                                                             | 1: 0.00012,                         |
| AZOLI_3078   | 1: 0.00020, 2: 0.00034, 4: 0.00065,             | 1: 0.00028, 2: 0.00053, 4: 0.00035,             | AZOBR_150203 | 4: 0.00008,                                                 |                                     |
| AZOLI_3081   | 1: 0.00302, 2: 0.00314, 3: 0.00467, 4: 0.00328, | 1: 0.00147, 2: 0.00159, 3: 0.00159, 4: 0.00168, | AZOBR_150206 |                                                             |                                     |
| AZOLI_3082   | 1: 0.00462, 2: 0.00501, 3: 0.00253, 4: 0.00440, | 1: 0.00322, 2: 0.00162, 3: 0.00237, 4: 0.00179, | AZOBR_150207 | 2: 0.00028, 4: 0.00014, 5: 0.00036,                         | 1: 0.00020, 2: 0.00046, 3: 0.00045, |
| AZOLI_3084   | 1: 0.00043, 2: 0.00018, 3: 0.00025, 4: 0.00012, | 1: 0.00047, 2: 0.00042, 3: 0.00027, 4: 0.00025, | AZOBR_150208 | 1: 0.00021, 2: 0.00019, 3: 0.00018, 4: 0.00022, 5: 0.00022, | 1: 0.00027, 3: 0.00026,             |
| AZOLI_3085   | 4: 0.00012,                                     |                                                 | AZOBR_150213 | 4: 0.00008, 5: 0.00008,                                     |                                     |
| AZOLI_3086   | 1: 0.00006, 2: 0.00006, 3: 0.00030, 4: 0.00019, | 2: 0.00012, 3: 0.00016, 4: 0.00019,             | AZOBR_150215 |                                                             |                                     |
| AZOLI_3087   | 1: 0.00005, 4: 0.00004,                         | 1: 0.00012, 2: 0.00012, 4: 0.00008,             | AZOBR_150224 | 1: 0.01177, 2: 0.01213, 3: 0.01169, 4: 0.01094, 5: 0.00920, | 1: 0.00666, 2: 0.00500, 3: 0.00488, |
| AZOLI_3089   | 1: 0.00017, 2: 0.00018, 4: 0.00015,             | 1: 0.00018, 2: 0.00042, 3: 0.00028, 4: 0.00015, | AZOBR_150226 |                                                             |                                     |
| AZOLI_3091   | 1: 0.00056, 2: 0.00071, 4: 0.00026,             | 1: 0.00020, 2: 0.00020, 4: 0.00017,             | AZOBR_150228 |                                                             |                                     |
| AZOLI_3092   |                                                 | 4: 0.00012,                                     | AZOBR_150229 | 1: 0.00017, 2: 0.00012, 3: 0.00014, 4: 0.00011, 5: 0.00007, | 1: 0.00006, 2: 0.00012, 3: 0.00006, |
| AZOLI_3096   |                                                 | 4: 0.00025,                                     | AZOBR_150233 | 1: 0.00016, 2: 0.00009, 3: 0.00027, 4: 0.00030, 5: 0.00011, | 2: 0.00008, 3: 0.00027,             |
| AZOLI_3099   | 2: 0.00012, 3: 0.00100, 4: 0.00038,             | 1: 0.00028, 2: 0.00019, 4: 0.00021,             | AZOBR_150234 | 1: 0.00074, 2: 0.00197, 3: 0.00092, 4: 0.00098, 5: 0.00084, | 1: 0.00229, 2: 0.00236, 3: 0.00176, |
| AZOLI_3101   | 1: 0.00171, 2: 0.00128, 3: 0.00063, 4: 0.00112, | 1: 0.00094, 2: 0.00083, 3: 0.00084, 4: 0.00071, | AZOBR_150236 | 1: 0.00775, 2: 0.00589, 3: 0.00553, 4: 0.00503, 5: 0.00553, | 1: 0.00416, 2: 0.00466, 3: 0.00347, |
| AZOLI_3106   | 2: 0.00026, 3: 0.00081, 4: 0.00022,             | 1: 0.00085, 2: 0.00082, 3: 0.00055, 4: 0.00050, | AZOBR_150237 | 1: 0.00576, 2: 0.00326, 3: 0.00412, 4: 0.00714, 5: 0.00413, | 1: 0.00369, 2: 0.00403, 3: 0.00458, |
| AZOLI_3107   | 2: 0.00048, 3: 0.00050, 4: 0.00067,             | 1: 0.00018, 3: 0.00032, 4: 0.00026,             | AZOBR_150238 | 1: 0.00445, 2: 0.00434, 3: 0.00478, 4: 0.00443, 5: 0.00678, | 1: 0.00626, 2: 0.00546, 3: 0.00553, |
| AZOLI_3109   | 1: 0.00065, 2: 0.00104, 4: 0.00121,             | 1: 0.00038, 2: 0.00018, 4: 0.00065,             | AZOBR_150239 | 1: 0.00774, 2: 0.00855, 3: 0.01102, 4: 0.00900, 5: 0.00701, | 1: 0.00385, 2: 0.00308, 3: 0.00511, |
| AZOLI_3110   | 1: 0.00109, 2: 0.00154, 3: 0.00431, 4: 0.00231, | 1: 0.00172, 2: 0.00160, 3: 0.00182, 4: 0.00170, | AZOBR_150240 | 1: 0.00631, 2: 0.00717, 3: 0.00670, 4: 0.00768, 5: 0.00622, | 1: 0.00615, 2: 0.00496, 3: 0.00540, |
| AZOLI_3111   |                                                 | 1: 0.00010, 3: 0.00014, 4: 0.00006,             | AZOBR_150242 | 1: 0.00188, 2: 0.00464, 3: 0.00256, 4: 0.00577, 5: 0.00466, | 1: 0.00297, 2: 0.00173, 3: 0.00334, |
| AZOLI_3112   | 4: 0.00008,                                     | 2: 0.00018, 3: 0.00010, 4: 0.00012,             | AZOBR_150243 | 1: 0.00316, 2: 0.00292, 3: 0.00269, 4: 0.00178, 5: 0.00357, | 1: 0.00239, 2: 0.00178, 3: 0.00188, |
| AZOLI_3118   | 2: 0.00092,                                     |                                                 | AZOBR_150244 | 1: 0.00314, 2: 0.00612, 3: 0.00481, 4: 0.00583, 5: 0.00590, | 1: 0.00470, 2: 0.00417, 3: 0.00501, |
| AZOLI_3120   | 1: 0.00014, 2: 0.00038, 3: 0.00043, 4: 0.00044, | 1: 0.00066, 2: 0.00047, 3: 0.00077, 4: 0.00041, | AZOBR_150245 | 1: 0.00511, 2: 0.00464, 3: 0.00541, 4: 0.00866, 5: 0.00543, | 1: 0.00345, 2: 0.00342, 3: 0.00498, |
| AZOLI_3121   | 1: 0.00029, 2: 0.00014, 3: 0.00010, 4: 0.00022, | 1: 0.00022, 2: 0.00028, 3: 0.00008, 4: 0.00012, | AZOBR_150246 | 1: 0.00571, 2: 0.00494, 3: 0.00740, 4: 0.00361, 5: 0.00287, | 1: 0.00217, 2: 0.00217, 3: 0.00288, |
| AZOLI_3122   | 1: 0.00020, 2: 0.00020, 3: 0.00023, 4: 0.00021, | 1: 0.00037, 2: 0.00008, 3: 0.00022, 4: 0.00010, | AZOBR_150247 | 1: 0.01279, 2: 0.01282, 3: 0.01825, 4: 0.01012, 5: 0.01085, | 1: 0.00609, 2: 0.00604, 3: 0.00709, |
| AZOLI_3124   | 2: 0.00012, 4: 0.00007,                         | 1: 0.00023, 4: 0.00017,                         | AZOBR_150248 | 1: 0.00320, 2: 0.00754, 3: 0.00309, 4: 0.00500, 5: 0.00559, | 1: 0.00492, 2: 0.00249, 3: 0.00318, |
| AZOLI_3128   | 1: 0.00174, 2: 0.00155, 3: 0.00063, 4: 0.00136, | 1: 0.00340, 2: 0.00288, 3: 0.00321, 4: 0.00346, | AZOBR_150249 | 1: 0.00457, 2: 0.00475, 3: 0.00441, 4: 0.00224, 5: 0.00448, | 1: 0.00286, 2: 0.00303, 3: 0.00227, |
| AZOLI_3129   |                                                 | 4: 0.00015,                                     | AZOBR_150250 | 1: 0.00343, 2: 0.00393, 3: 0.00369, 4: 0.00294, 5: 0.00392, | 1: 0.00227, 2: 0.00283, 3: 0.00199, |
| AZOLI_3133   | 1: 0.00020,                                     |                                                 | AZOBR_150251 | 1: 0.00942, 2: 0.01165, 3: 0.00944, 4: 0.00916, 5: 0.00955, | 1: 0.00689, 2: 0.00847, 3: 0.00468, |
| AZOLI_3135   | 4: 0.00010,                                     |                                                 | AZOBR_150252 | 1: 0.01341, 2: 0.00989, 3: 0.01317, 4: 0.00652, 5: 0.00990, | 1: 0.00799, 2: 0.00862, 3: 0.00686, |
| AZOLI_3153   | 1: 0.00019, 2: 0.00025, 3: 0.00027, 4: 0.00035, | 1: 0.00039, 2: 0.00044, 3: 0.00040, 4: 0.00031, | AZOBR_150253 | 1: 0.00565, 2: 0.00536, 3: 0.00414, 4: 0.00458, 5: 0.00459, | 1: 0.00308, 2: 0.00246, 3: 0.00226, |
| AZOLI_3154   |                                                 | 3: 0.00009, 4: 0.00005,                         | AZOBR_150254 | 1: 0.01659, 2: 0.01624, 3: 0.01342, 4: 0.00771, 5: 0.00992, | 1: 0.00319, 2: 0.00665, 3: 0.00412, |
| AZOLI_3155   | 1: 0.00075, 2: 0.00061, 3: 0.00034, 4: 0.00067, | 1: 0.00067, 2: 0.00047, 3: 0.00078, 4: 0.00083, | AZOBR_150255 | 1: 0.01092, 2: 0.00834, 3: 0.00864, 4: 0.00975, 5: 0.01050, | 1: 0.00912, 2: 0.00780, 3: 0.00661, |
| AZOLI_3158   | 1: 0.00020, 2: 0.00021, 4: 0.00056,             | 1: 0.00050, 2: 0.00040, 3: 0.00039, 4: 0.00018, | AZOBR_150256 | 1: 0.01205, 2: 0.00782, 3: 0.00995, 4: 0.00801, 5: 0.00908, | 1: 0.00418, 2: 0.00421, 3: 0.00344, |
| AZOLI_3159   | 1: 0.00359, 2: 0.00406, 3: 0.00194, 4: 0.00428, | 1: 0.00172, 2: 0.00145, 3: 0.00113, 4: 0.00146, | AZOBR_150257 | 1: 0.00171, 2: 0.00390, 3: 0.00424, 4: 0.00480, 5: 0.00697, | 1: 0.00228, 2: 0.00404, 3: 0.00212, |
| AZOLI_3164   | 1: 0.00023, 3: 0.00026, 4: 0.00012,             | 1: 0.00019, 2: 0.00049, 3: 0.00010, 4: 0.00020, | AZOBR_160002 | 4: 0.00003, 5: 0.00004,                                     | 1: 0.00005, 3: 0.00009,             |
| AZOLI_3166   | 1: 0.00028, 2: 0.00014, 4: 0.00012,             | 1: 0.00022, 2: 0.00021, 3: 0.00015, 4: 0.00012, | AZOBR_160003 | 1: 0.00428, 2: 0.00698, 3: 0.00618, 4: 0.00455, 5: 0.00353, | 1: 0.00310, 2: 0.00339, 3: 0.00272, |
| AZOLI_3167   |                                                 | 1: 0.00049, 4: 0.00021,                         | AZOBR_160004 | 1: 0.01274, 2: 0.00980, 3: 0.01276, 4: 0.00853, 5: 0.01001, | 1: 0.00204, 2: 0.00370, 3: 0.00249, |
| AZOLI_3168   | 1: 0.00007, 2: 0.00017,                         | 1: 0.00013, 3: 0.00011, 4: 0.00011,             | AZOBR_160005 |                                                             |                                     |
| AZOLI_3169   | 1: 0.00022, 2: 0.00029, 3: 0.00022, 4: 0.00044, | 1: 0.00016, 2: 0.00026, 3: 0.00026, 4: 0.00019, | AZOBR_160006 | 1: 0.00034, 2: 0.00048, 3: 0.00041, 4: 0.00046, 5: 0.00045, | 1: 0.00024, 2: 0.00022, 3: 0.00036, |
| AZOLI_3174   | 1: 0.00062, 2: 0.00042, 3: 0.00039, 4: 0.00024, | 1: 0.00063, 2: 0.00040, 3: 0.00067, 4: 0.00036, | AZOBR_160007 | 1: 0.00044, 2: 0.00023, 3: 0.00035, 4: 0.00044, 5: 0.00037, | 1: 0.00033, 2: 0.00038, 3: 0.00050, |
| AZOLI_3178   | 1: 0.00088, 2: 0.00119, 3: 0.00401, 4: 0.00072, | 1: 0.00169, 2: 0.00197, 3: 0.00245, 4: 0.00273, | AZOBR_160009 | 1: 0.02435, 2: 0.01975, 3: 0.01695, 4: 0.01580, 5: 0.01914, | 1: 0.02175, 2: 0.02055, 3: 0.02270, |
| AZOLI_p10011 | 1: 0.00020, 2: 0.00027, 4: 0.00024,             |                                                 | AZOBR_160010 | 1: 0.01595, 2: 0.01304, 3: 0.01099, 4: 0.00680, 5: 0.00827, | 1: 0.01049, 2: 0.01174, 3: 0.00472, |
| AZOLI_p10015 | 1: 0.00048, 2: 0.00072, 3: 0.00127, 4: 0.00061, | 1: 0.00115, 2: 0.00141, 3: 0.00119, 4: 0.00114, | AZOBR_160011 | 1: 0.00573, 2: 0.00605, 3: 0.00584, 4: 0.00622, 5: 0.00872, | 1: 0.00467, 2: 0.00304, 3: 0.00403, |
| AZOLI_p10018 | 1: 0.00020, 2: 0.00020,                         |                                                 | AZOBR_160012 | 1: 0.00907, 2: 0.00828, 3: 0.00532, 4: 0.00896, 5: 0.01098, | 1: 0.00413, 2: 0.00565, 3: 0.00495, |
| AZOLI_p10024 |                                                 | 4: 0.00007,                                     | AZOBR_160013 | 1: 0.00487, 2: 0.00284, 3: 0.00421, 4: 0.00222, 5: 0.00233, | 1: 0.00042, 2: 0.00282, 3: 0.00103, |
| AZOLI_p10025 |                                                 | 2: 0.00003, 4: 0.00003,                         | AZOBR_160015 | 1: 0.01081, 2: 0.01340, 3: 0.01233,                         | 1: 0.00787, 2: 0.00790,             |

|              |                                                    |                                                    |              |                                                                |                                        |
|--------------|----------------------------------------------------|----------------------------------------------------|--------------|----------------------------------------------------------------|----------------------------------------|
|              |                                                    |                                                    |              | 4: 0.01002, 5: 0.01135,                                        | 3: 0.00649,                            |
| AZOLI_p10026 |                                                    | 1: 0.00018, 3: 0.00009,<br>4: 0.00019,             | AZOBR_160015 | 1: 0.01081, 2: 0.01340, 3: 0.01233,<br>4: 0.01002, 5: 0.01135, | 1: 0.00787, 2: 0.00790,<br>3: 0.00649, |
| AZOLI_p10027 |                                                    | 1: 0.00006, 3: 0.00005,<br>4: 0.00005,             | AZOBR_160017 | 2: 0.00014, 4: 0.00007,                                        | 1: 0.00029, 2: 0.00007,<br>3: 0.00016, |
| AZOLI_p10028 | 4: 0.00005,                                        |                                                    | AZOBR_160024 | 2: 0.00011, 4: 0.00008, 5: 0.00013,                            |                                        |
| AZOLI_p10029 | 1: 0.00006, 3: 0.00036,                            | 1: 0.00044, 2: 0.00037,<br>3: 0.00053, 4: 0.00042, | AZOBR_160033 |                                                                |                                        |
| AZOLI_p10030 |                                                    | 2: 0.00008, 3: 0.00009,<br>4: 0.00005,             | AZOBR_160036 |                                                                |                                        |
| AZOLI_p10035 | 1: 0.00034, 3: 0.00048,                            |                                                    | AZOBR_160038 |                                                                | 1: 0.00115, 2: 0.00087,<br>3: 0.00093, |
| AZOLI_p10036 | 4: 0.00002,                                        |                                                    | AZOBR_160039 | 1: 0.00042, 2: 0.00056, 3: 0.00042,<br>4: 0.00072, 5: 0.00046, | 1: 0.00103, 2: 0.00077,<br>3: 0.00076, |
| AZOLI_p10043 | 1: 0.00020, 2: 0.00013,<br>4: 0.00040,             | 3: 0.00007, 4: 0.00006,                            | AZOBR_160051 |                                                                |                                        |
| AZOLI_p10045 | 1: 0.00004, 3: 0.00002,<br>4: 0.00002,             | 3: 0.00004, 4: 0.00002,                            | AZOBR_160052 |                                                                |                                        |
| AZOLI_p10053 | 1: 0.00023, 2: 0.00010,<br>4: 0.00020,             | 2: 0.00029, 3: 0.00032,<br>4: 0.00014,             | AZOBR_160053 |                                                                |                                        |
| AZOLI_p10054 | 1: 0.00012, 2: 0.00040,<br>4: 0.00031,             | 2: 0.00008, 4: 0.00014,                            | AZOBR_160054 |                                                                | 2: 0.00009,                            |
| AZOLI_p10066 | 1: 0.00041, 2: 0.00064,<br>4: 0.00026,             | 1: 0.00034, 2: 0.00011,<br>3: 0.00024, 4: 0.00010, | AZOBR_160056 |                                                                |                                        |
| AZOLI_p10074 | 1: 0.00007,                                        |                                                    | AZOBR_160057 |                                                                | 1: 0.00150, 2: 0.00161,<br>3: 0.00150, |
| AZOLI_p10075 | 1: 0.00008, 2: 0.00005,<br>4: 0.00013,             | 1: 0.00092, 2: 0.00081,<br>3: 0.00100, 4: 0.00103, | AZOBR_160063 |                                                                | 2: 0.00006,                            |
| AZOLI_p10078 |                                                    | 4: 0.00012,                                        | AZOBR_160066 |                                                                |                                        |
| AZOLI_p10079 |                                                    | 3: 0.00016, 4: 0.00021,                            | AZOBR_160068 |                                                                |                                        |
| AZOLI_p10082 | 1: 0.00008, 2: 0.00008,<br>4: 0.00020,             |                                                    | AZOBR_160070 | 1: 0.00051, 4: 0.00058, 5: 0.00070,                            | 1: 0.00043, 2: 0.00037,<br>3: 0.00063, |
| AZOLI_p10086 | 1: 0.00066, 2: 0.00071,<br>4: 0.00091,             | 1: 0.00049, 2: 0.00064,<br>3: 0.00099, 4: 0.00057, | AZOBR_160073 |                                                                | 2: 0.00023, 3: 0.00019,                |
| AZOLI_p10093 | 1: 0.00727, 2: 0.01083,<br>3: 0.00766, 4: 0.00665, | 1: 0.00745, 2: 0.00631,<br>3: 0.00654, 4: 0.00539, | AZOBR_160075 |                                                                |                                        |
| AZOLI_p10094 | 1: 0.00426, 2: 0.00296,<br>3: 0.00521, 4: 0.00421, | 1: 0.00404, 2: 0.00361,<br>3: 0.00292, 4: 0.00434, | AZOBR_160076 |                                                                |                                        |
| AZOLI_p10095 | 1: 0.00070, 2: 0.00054,<br>3: 0.00009, 4: 0.00022, | 1: 0.00067, 2: 0.00065,<br>3: 0.00051, 4: 0.00025, | AZOBR_160078 | 1: 0.00102, 2: 0.00079, 3: 0.00084,<br>4: 0.00082, 5: 0.00080, | 1: 0.00175, 2: 0.00137,<br>3: 0.00101, |
| AZOLI_p10097 | 1: 0.00496, 2: 0.00523,<br>3: 0.00188, 4: 0.00274, | 1: 0.00232, 2: 0.00169,<br>3: 0.00209, 4: 0.00101, | AZOBR_160079 |                                                                | 1: 0.00036,                            |
| AZOLI_p10102 | 4: 0.00004,                                        |                                                    | AZOBR_170001 | 1: 0.00068, 2: 0.00036, 3: 0.00105,<br>4: 0.00113, 5: 0.00097, | 1: 0.00058, 2: 0.00053,<br>3: 0.00074, |
| AZOLI_p10154 | 4: 0.00003,                                        | 4: 0.00003,                                        | AZOBR_170004 |                                                                |                                        |
| AZOLI_p10155 | 4: 0.00002,                                        | 1: 0.00002, 3: 0.00002,<br>4: 0.00003,             | AZOBR_170005 | 4: 0.00007, 5: 0.00005,                                        |                                        |
| AZOLI_p10156 | 1: 0.00018, 2: 0.00017,<br>3: 0.00014, 4: 0.00021, | 1: 0.00020, 2: 0.00032,<br>3: 0.00036, 4: 0.00024, | AZOBR_170006 | 1: 0.00060, 2: 0.00053, 3: 0.00048,<br>4: 0.00064, 5: 0.00065, | 1: 0.00065, 2: 0.00050,<br>3: 0.00072, |
| AZOLI_p10189 | 4: 0.00003,                                        |                                                    | AZOBR_170007 |                                                                |                                        |
| AZOLI_p10197 | 3: 0.00022,                                        | 1: 0.00013, 2: 0.00021,<br>3: 0.00031, 4: 0.00018, | AZOBR_170009 | 1: 0.00202, 2: 0.00174, 3: 0.00217,<br>4: 0.00147, 5: 0.00183, | 1: 0.00130, 2: 0.00173,<br>3: 0.00183, |
| AZOLI_p10199 |                                                    | 1: 0.00017, 2: 0.00008,<br>3: 0.00006, 4: 0.00010, | AZOBR_170010 |                                                                |                                        |
| AZOLI_p10200 | 1: 0.00027, 2: 0.00094,<br>3: 0.00062, 4: 0.00052, | 2: 0.00027, 3: 0.00023,<br>4: 0.00033,             | AZOBR_170011 | 1: 0.00008, 4: 0.00010, 5: 0.00005,                            | 1: 0.00010, 2: 0.00006,                |
| AZOLI_p10214 | 4: 0.00008,                                        |                                                    | AZOBR_180002 | 3: 0.00006, 4: 0.00005,                                        | 3: 0.00007,                            |
| AZOLI_p10227 | 2: 0.00019,                                        | 1: 0.00121, 2: 0.00108,<br>3: 0.00099, 4: 0.00087, | AZOBR_180003 | 4: 0.00004, 5: 0.00007,                                        | 3: 0.00004,                            |
| AZOLI_p10232 | 4: 0.00012,                                        | 1: 0.00018, 2: 0.00007,<br>4: 0.00027,             | AZOBR_180004 |                                                                | 2: 0.00020, 3: 0.00017,                |
| AZOLI_p10247 | 1: 0.00005,                                        | 1: 0.00011, 2: 0.00005,<br>3: 0.00012, 4: 0.00007, | AZOBR_180007 |                                                                |                                        |
| AZOLI_p10251 | 1: 0.00004,                                        |                                                    | AZOBR_180009 | 1: 0.00009, 4: 0.00006, 5: 0.00008,                            | 1: 0.00004, 2: 0.00006,                |
| AZOLI_p10253 |                                                    | 1: 0.00023, 2: 0.00014,<br>3: 0.00029, 4: 0.00016, | AZOBR_180012 | 1: 0.00058, 2: 0.00034, 3: 0.00033,<br>4: 0.00038, 5: 0.00040, | 1: 0.00043, 2: 0.00047,<br>3: 0.00048, |
| AZOLI_p10253 |                                                    | 1: 0.00024, 2: 0.00023,<br>4: 0.00016,             | AZOBR_180013 |                                                                |                                        |
| AZOLI_p10260 | 1: 0.00006, 2: 0.00006,<br>3: 0.00023, 4: 0.00011, | 1: 0.00036, 2: 0.00038,<br>3: 0.00028, 4: 0.00027, | AZOBR_180015 |                                                                | 1: 0.00010, 2: 0.00016,<br>3: 0.00047, |
| AZOLI_p10265 | 1: 0.00103, 2: 0.00046,<br>3: 0.00036, 4: 0.00039, | 1: 0.00079, 2: 0.00158,<br>3: 0.00090, 4: 0.00084, | AZOBR_180019 |                                                                | 1: 0.00008,                            |
| AZOLI_p10267 |                                                    | 2: 0.00030, 3: 0.00013,<br>4: 0.00024,             | AZOBR_180020 |                                                                |                                        |
| AZOLI_p10268 | 1: 0.00178, 2: 0.00196,<br>3: 0.00405, 4: 0.00220, | 1: 0.00189, 2: 0.00169,<br>3: 0.00214, 4: 0.00251, | AZOBR_180022 | 3: 0.00016,                                                    |                                        |
| AZOLI_p10269 | 1: 0.00039, 2: 0.00048,<br>3: 0.00037, 4: 0.00019, | 1: 0.00049, 2: 0.00030,<br>3: 0.00051, 4: 0.00030, | AZOBR_180025 |                                                                |                                        |
| AZOLI_p10271 | 4: 0.00045,                                        | 1: 0.00008, 2: 0.00016,<br>3: 0.00022, 4: 0.00014, | AZOBR_180027 |                                                                | 1: 0.00012, 3: 0.00012,                |
| AZOLI_p10276 | 1: 0.00021, 2: 0.00019,<br>3: 0.00122, 4: 0.00038, | 1: 0.00062, 2: 0.00078,<br>3: 0.00096, 4: 0.00083, | AZOBR_180029 |                                                                | 1: 0.00030, 3: 0.00025,                |
| AZOLI_p10279 | 3: 0.00047,                                        |                                                    | AZOBR_180030 | 1: 0.00029, 2: 0.00017, 3: 0.00028,<br>4: 0.00056, 5: 0.00031, | 1: 0.00017, 2: 0.00009,<br>3: 0.00010, |
| AZOLI_p10286 | 4: 0.00030,                                        |                                                    | AZOBR_180031 | 1: 0.00058, 2: 0.00129, 3: 0.00133,<br>4: 0.00094, 5: 0.00094, | 1: 0.00062, 2: 0.00021,<br>3: 0.00036, |
| AZOLI_p10290 | 1: 0.00025, 2: 0.00020,<br>4: 0.00021,             | 1: 0.00065, 2: 0.00048,<br>3: 0.00021, 4: 0.00064, | AZOBR_180034 |                                                                |                                        |
| AZOLI_p10303 | 1: 0.00171, 2: 0.00078,<br>3: 0.00078, 4: 0.00131, | 1: 0.00061, 2: 0.00073,<br>3: 0.00071, 4: 0.00059, | AZOBR_180036 | 4: 0.00083, 5: 0.00033,                                        |                                        |

|              |                                                 |                                                 |              |                                                             |                                     |
|--------------|-------------------------------------------------|-------------------------------------------------|--------------|-------------------------------------------------------------|-------------------------------------|
| AZOLI_p10305 | 4: 0.00011,                                     | 4: 0.00004,                                     | AZOBR_180037 | 1: 0.00016, 2: 0.00003, 3: 0.00015, 4: 0.00011, 5: 0.00009, | 1: 0.00023, 2: 0.00017, 3: 0.00030, |
| AZOLI_p10306 | 3: 0.00028, 4: 0.00023,                         | 2: 0.00019, 4: 0.00029,                         | AZOBR_180039 | 1: 0.00158, 2: 0.00177, 3: 0.00155, 4: 0.00151, 5: 0.00159, | 1: 0.00016, 3: 0.00023,             |
| AZOLI_p10309 | 1: 0.00049, 2: 0.00069, 4: 0.00025,             | 1: 0.00049, 2: 0.00114, 3: 0.00021, 4: 0.00051, | AZOBR_180043 |                                                             | 2: 0.00005, 3: 0.00004,             |
| AZOLI_p10311 | 4: 0.00003,                                     |                                                 | AZOBR_180063 | 1: 0.00015, 2: 0.00014, 3: 0.00020, 4: 0.00009, 5: 0.00012, | 1: 0.00013, 2: 0.00007, 3: 0.00017, |
| AZOLI_p10320 | 1: 0.00011, 3: 0.00080, 4: 0.00049,             | 1: 0.00023, 2: 0.00036, 3: 0.00021, 4: 0.00054, | AZOBR_180064 | 1: 0.00010, 3: 0.00011, 4: 0.00024, 5: 0.00009,             | 1: 0.00004, 2: 0.00009, 3: 0.00012, |
| AZOLI_p10321 | 1: 0.00096, 2: 0.00158, 3: 0.00727, 4: 0.00105, | 1: 0.00221, 2: 0.00258, 3: 0.00217, 4: 0.00231, | AZOBR_180068 |                                                             |                                     |
| AZOLI_p10325 |                                                 | 1: 0.00005, 4: 0.00004,                         | AZOBR_180069 |                                                             |                                     |
| AZOLI_p10331 | 1: 0.00027, 2: 0.00036, 4: 0.00061,             | 1: 0.00090, 2: 0.00069, 3: 0.00028, 4: 0.00107, | AZOBR_180071 | 1: 0.00043, 2: 0.00023, 3: 0.00033, 4: 0.00038, 5: 0.00030, | 1: 0.00006, 2: 0.00006, 3: 0.00011, |
| AZOLI_p10333 | 1: 0.00021, 2: 0.00017, 4: 0.00007,             |                                                 | AZOBR_180074 | 4: 0.00015, 5: 0.00023,                                     | 1: 0.00043, 3: 0.00028,             |
| AZOLI_p10337 |                                                 | 1: 0.00004, 4: 0.00003,                         | AZOBR_180079 | 1: 0.00248, 2: 0.00422, 3: 0.00276, 4: 0.00158, 5: 0.00290, | 1: 0.00477, 2: 0.00445, 3: 0.00439, |
| AZOLI_p10340 | 1: 0.00053, 2: 0.00039, 3: 0.00027, 4: 0.00028, | 1: 0.00101, 2: 0.00066, 3: 0.00068, 4: 0.00077, | AZOBR_180080 | 1: 0.00088, 2: 0.00111, 3: 0.00128, 4: 0.00146, 5: 0.00086, | 1: 0.00032, 2: 0.00064, 3: 0.00039, |
| AZOLI_p10345 | 2: 0.00014, 4: 0.00009,                         | 2: 0.00007,                                     | AZOBR_180081 | 2: 0.00008, 3: 0.00005, 4: 0.00021, 5: 0.00017,             |                                     |
| AZOLI_p10347 | 1: 0.00035, 2: 0.00162, 3: 0.00138, 4: 0.00138, | 1: 0.00156, 2: 0.00082, 3: 0.00105, 4: 0.00127, | AZOBR_180083 |                                                             | 2: 0.00002,                         |
| AZOLI_p10352 | 2: 0.00014, 3: 0.00009, 4: 0.00009,             | 1: 0.00010, 3: 0.00018, 4: 0.00023,             | AZOBR_180085 | 2: 0.00010, 3: 0.00010, 4: 0.00008,                         |                                     |
| AZOLI_p10355 | 1: 0.00005, 2: 0.00005, 4: 0.00021,             | 1: 0.00025, 2: 0.00013, 3: 0.00020, 4: 0.00012, | AZOBR_180086 | 1: 0.00012, 2: 0.00008, 3: 0.00010, 4: 0.00010, 5: 0.00003, | 1: 0.00003, 2: 0.00009, 3: 0.00007, |
| AZOLI_p10367 | 4: 0.00005,                                     |                                                 | AZOBR_180090 |                                                             | 1: 0.00011, 3: 0.00011,             |
| AZOLI_p10368 | 4: 0.00010,                                     | 4: 0.00013,                                     | AZOBR_180091 | 1: 0.00022, 2: 0.00011, 3: 0.00029, 4: 0.00009, 5: 0.00009, | 1: 0.00014, 2: 0.00016, 3: 0.00032, |
| AZOLI_p10369 | 1: 0.00059, 2: 0.00025, 4: 0.00021,             | 1: 0.00028, 2: 0.00021, 3: 0.00030, 4: 0.00019, | AZOBR_180094 | 1: 0.00018, 2: 0.00013, 3: 0.00018, 4: 0.00014, 5: 0.00006, | 1: 0.00004,                         |
| AZOLI_p10376 | 1: 0.00067, 2: 0.00082, 3: 0.00014, 4: 0.00093, | 1: 0.00260, 2: 0.00187, 3: 0.00242, 4: 0.00175, | AZOBR_180095 | 1: 0.00015, 3: 0.00012, 4: 0.00004,                         | 1: 0.00004, 2: 0.00013, 3: 0.00009, |
| AZOLI_p10386 | 1: 0.00010, 2: 0.00010, 4: 0.00017,             | 1: 0.00007, 2: 0.00019, 3: 0.00021, 4: 0.00011, | AZOBR_180097 | 3: 0.00005,                                                 | 2: 0.00005,                         |
| AZOLI_p10388 | 1: 0.00015, 2: 0.00012, 4: 0.00026,             | 2: 0.00009, 4: 0.00008,                         | AZOBR_180099 |                                                             | 1: 0.00024, 2: 0.00013, 3: 0.00027, |
| AZOLI_p10389 | 1: 0.00084, 2: 0.00063, 3: 0.00141, 4: 0.00105, | 1: 0.00083, 2: 0.00104, 3: 0.00076, 4: 0.00152, | AZOBR_180101 | 3: 0.00044, 5: 0.00035,                                     |                                     |
| AZOLI_p10390 | 3: 0.00152, 4: 0.00074,                         | 1: 0.00044, 2: 0.00074, 3: 0.00081, 4: 0.00084, | AZOBR_180103 | 1: 0.00015, 2: 0.00005, 3: 0.00008, 5: 0.00009,             | 1: 0.00010, 2: 0.00020, 3: 0.00023, |
| AZOLI_p10391 | 3: 0.00022,                                     | 1: 0.00129, 2: 0.00161, 3: 0.00122, 4: 0.00159, | AZOBR_180104 | 1: 0.00057, 2: 0.00008, 3: 0.00020, 4: 0.00019, 5: 0.00033, | 1: 0.00009, 2: 0.00010, 3: 0.00021, |
| AZOLI_p10392 |                                                 | 1: 0.00007, 2: 0.00010, 4: 0.00009,             | AZOBR_180105 | 1: 0.00009, 2: 0.00028, 3: 0.00027, 4: 0.00025, 5: 0.00013, | 1: 0.00015, 2: 0.00023, 3: 0.00014, |
| AZOLI_p10413 | 1: 0.00011, 2: 0.00024, 4: 0.00003,             | 1: 0.00013, 2: 0.00020, 3: 0.00008, 4: 0.00005, | AZOBR_180107 | 4: 0.00010,                                                 | 2: 0.00005, 3: 0.00006,             |
| AZOLI_p10414 | 1: 0.00013, 2: 0.00023, 4: 0.00033,             | 1: 0.00010, 2: 0.00007, 3: 0.00008,             | AZOBR_180108 | 1: 0.00076, 2: 0.00050, 3: 0.00077, 4: 0.00050, 5: 0.00084, | 1: 0.00027, 2: 0.00034, 3: 0.00047, |
| AZOLI_p10421 | 1: 0.00032, 2: 0.00032, 4: 0.00018,             | 1: 0.00043, 2: 0.00052, 3: 0.00057, 4: 0.00028, | AZOBR_180110 |                                                             |                                     |
| AZOLI_p10480 | 1: 0.00015, 2: 0.00016,                         |                                                 | AZOBR_180111 |                                                             | 1: 0.00030, 3: 0.00059,             |
| AZOLI_p10482 | 1: 0.00066, 2: 0.00074, 3: 0.00024, 4: 0.00082, | 1: 0.00052, 2: 0.00036, 3: 0.00024, 4: 0.00051, | AZOBR_180112 | 4: 0.00004,                                                 | 3: 0.00002,                         |
| AZOLI_p10487 | 1: 0.00015, 2: 0.00015, 4: 0.00015,             | 4: 0.00006,                                     | AZOBR_180116 | 1: 0.00010, 2: 0.00007, 3: 0.00016, 4: 0.00009, 5: 0.00007, | 3: 0.00005,                         |
| AZOLI_p10489 | 1: 0.00018, 4: 0.00010,                         | 2: 0.00012,                                     | AZOBR_180117 |                                                             |                                     |
| AZOLI_p10490 | 4: 0.00008,                                     |                                                 | AZOBR_180118 | 2: 0.00026, 3: 0.00050, 4: 0.00024, 5: 0.00016,             | 3: 0.00026,                         |
| AZOLI_p10490 | 2: 0.00028,                                     | 1: 0.00022, 2: 0.00011, 4: 0.00009,             | AZOBR_180119 | 1: 0.00019, 4: 0.00023, 5: 0.00010,                         | 1: 0.00005, 2: 0.00005, 3: 0.00005, |
| AZOLI_p10491 | 1: 0.00021, 2: 0.00021, 4: 0.00021,             | 1: 0.00021, 2: 0.00016, 3: 0.00022, 4: 0.00021, | AZOBR_180120 | 1: 0.00300, 2: 0.00477, 3: 0.00398, 4: 0.00372, 5: 0.00563, | 1: 0.00430, 2: 0.00341, 3: 0.00440, |
| AZOLI_p10498 | 1: 0.00081, 2: 0.00109, 3: 0.00030, 4: 0.00098, | 1: 0.00058, 2: 0.00050, 3: 0.00061, 4: 0.00036, | AZOBR_180121 |                                                             |                                     |
| AZOLI_p10502 | 1: 0.00015, 2: 0.00021, 4: 0.00020,             | 1: 0.00005, 2: 0.00005, 3: 0.00006, 4: 0.00011, | AZOBR_180123 | 1: 0.00021, 2: 0.00015, 3: 0.00021, 4: 0.00020, 5: 0.00017, | 1: 0.00016, 2: 0.00027, 3: 0.00026, |
| AZOLI_p10512 | 3: 0.00011,                                     | 1: 0.00095, 2: 0.00147, 3: 0.00127, 4: 0.00169, | AZOBR_180127 | 3: 0.00005, 4: 0.00003,                                     |                                     |
| AZOLI_p10518 |                                                 | 4: 0.00005,                                     | AZOBR_180128 |                                                             |                                     |
| AZOLI_p10528 |                                                 | 4: 0.00005,                                     | AZOBR_180129 |                                                             | 3: 0.00012,                         |
| AZOLI_p10532 | 1: 0.00503, 2: 0.00484, 3: 0.00062, 4: 0.00346, | 1: 0.00226, 2: 0.00221, 3: 0.00170, 4: 0.00169, | AZOBR_180136 | 4: 0.00005,                                                 |                                     |
| AZOLI_p10535 | 2: 0.00007, 4: 0.00020,                         | 1: 0.00013, 2: 0.00016, 3: 0.00014, 4: 0.00025, | AZOBR_180137 |                                                             | 1: 0.00186, 2: 0.00211, 3: 0.00193, |
| AZOLI_p10566 | 1: 0.00008, 2: 0.00011, 4: 0.00024,             | 1: 0.00018, 2: 0.00013, 3: 0.00014, 4: 0.00011, | AZOBR_180140 |                                                             | 1: 0.00016, 3: 0.00031,             |
| AZOLI_p10572 | 1: 0.00003,                                     |                                                 | AZOBR_180141 |                                                             | 3: 0.00016,                         |
| AZOLI_p10573 |                                                 | 1: 0.00008,                                     | AZOBR_180142 | 1: 0.00027, 2: 0.00013, 3: 0.00020, 4: 0.00054, 5: 0.00044, | 1: 0.00048, 2: 0.00039, 3: 0.00075, |
| AZOLI_p10574 |                                                 | 2: 0.00031, 4: 0.00054,                         | AZOBR_180146 |                                                             |                                     |
| AZOLI_p10576 | 4: 0.00006,                                     | 3: 0.00007,                                     | AZOBR_180152 |                                                             |                                     |
| AZOLI_p10581 | 1: 0.00008,                                     |                                                 | AZOBR_180154 | 3: 0.00008, 4: 0.00017, 5: 0.00010,                         |                                     |
| AZOLI_p10584 | 1: 0.00027, 2: 0.00046, 3: 0.00118, 4: 0.00063, | 1: 0.00124, 2: 0.00112, 3: 0.00163, 4: 0.00174, | AZOBR_180157 | 4: 0.00011,                                                 |                                     |
| AZOLI_p10585 | 1: 0.00046, 2: 0.00039,                         | 1: 0.00039, 2: 0.00060,                         | AZOBR_180160 |                                                             | 2: 0.00006,                         |
| AZOLI_p10587 |                                                 | 1: 0.00204, 2: 0.00049,                         | AZOBR_180162 |                                                             | 1: 0.00011, 2: 0.00012,             |

|              |                                                    |                                                                               |              |                                                                                                          |                                                                   |
|--------------|----------------------------------------------------|-------------------------------------------------------------------------------|--------------|----------------------------------------------------------------------------------------------------------|-------------------------------------------------------------------|
|              |                                                    | 3: 0.00054, 4: 0.00087,                                                       |              |                                                                                                          | 3: 0.00041,                                                       |
| AZOLI_p10590 | 1: 0.00003, 2: 0.00004,                            | 1: 0.00010, 2: 0.00003,<br>3: 0.00002, 4: 0.00006,                            | AZOBR_180164 | 4: 0.00006,                                                                                              |                                                                   |
| AZOLI_p10591 | 2: 0.00014, 4: 0.00007,                            | 2: 0.00005, 3: 0.00012,<br>4: 0.00009,                                        | AZOBR_180166 |                                                                                                          | 1: 0.00040, 2: 0.00023,<br>3: 0.00039,                            |
| AZOLI_p10592 |                                                    | 4: 0.00006,                                                                   | AZOBR_180172 | 4: 0.00029,                                                                                              | 1: 0.00359, 2: 0.00347,<br>3: 0.00735,                            |
| AZOLI_p10596 | 1: 0.00033, 2: 0.00013,<br>4: 0.00036,             | 1: 0.00021, 2: 0.00016,<br>4: 0.00011,                                        | AZOBR_180173 |                                                                                                          | 1: 0.00042, 3: 0.00104,                                           |
| AZOLI_p10599 | 1: 0.00087, 2: 0.00041,<br>3: 0.00009, 4: 0.00043, |                                                                               | AZOBR_180179 |                                                                                                          |                                                                   |
| AZOLI_p10602 | 1: 0.00004,                                        | 2: 0.00005, 4: 0.00009,                                                       | AZOBR_180180 |                                                                                                          | 1: 0.00011,                                                       |
| AZOLI_p10605 | 2: 0.00020,                                        |                                                                               | AZOBR_180181 |                                                                                                          |                                                                   |
| AZOLI_p10611 | 1: 0.00077, 2: 0.00112,<br>3: 0.00075, 4: 0.00141, | 1: 0.00039, 2: 0.00014,<br>3: 0.00067, 4: 0.00054,                            | AZOBR_180182 |                                                                                                          | 2: 0.00004,                                                       |
| AZOLI_p10630 | 2: 0.00008,                                        |                                                                               | AZOBR_180183 |                                                                                                          | 1: 0.00009, 2: 0.00012,<br>3: 0.00015,                            |
| AZOLI_p10633 | 1: 0.00041, 2: 0.00043,<br>3: 0.00087, 4: 0.00086, | 1: 0.00067, 2: 0.00078,<br>3: 0.00071, 4: 0.00072,                            | AZOBR_180184 |                                                                                                          | 1: 0.00030, 2: 0.00029,<br>3: 0.00037,                            |
| AZOLI_p10634 | 2: 0.00003,                                        | 4: 0.00004,                                                                   | AZOBR_180191 | 4: 0.00015, 5: 0.00016,                                                                                  |                                                                   |
| AZOLI_p10637 | 4: 0.00008,                                        | 2: 0.00006, 4: 0.00005,                                                       | AZOBR_180192 | 4: 0.00011,                                                                                              |                                                                   |
| AZOLI_p10638 | 4: 0.00012,                                        |                                                                               | AZOBR_180193 |                                                                                                          |                                                                   |
| AZOLI_p10643 | 1: 0.00021, 2: 0.00027,<br>4: 0.00023,             | 1: 0.00019, 2: 0.00015,<br>3: 0.00016, 4: 0.00013,                            | AZOBR_180199 | 1: 0.00028, 3: 0.00018, 4: 0.00024,<br>5: 0.00034,                                                       | 1: 0.00013, 3: 0.00030,<br>1: 0.00172, 2: 0.00089,<br>3: 0.00118, |
| AZOLI_p10647 | 1: 0.00014,                                        | 2: 0.00009, 4: 0.00012,                                                       | AZOBR_180203 |                                                                                                          |                                                                   |
| AZOLI_p10655 | 1: 0.00022, 3: 0.00008,<br>4: 0.00007,             | 1: 0.00020, 2: 0.00033,<br>3: 0.00030, 4: 0.00031,                            | AZOBR_180204 |                                                                                                          |                                                                   |
| AZOLI_p10656 | 1: 0.00021, 2: 0.00054,                            |                                                                               | AZOBR_180206 |                                                                                                          | 1: 0.00006, 3: 0.00014,                                           |
| AZOLI_p10663 | 1: 0.00029, 2: 0.00030,<br>4: 0.00022,             | 1: 0.00019, 2: 0.00013,<br>3: 0.00008, 4: 0.00012,                            | AZOBR_180208 |                                                                                                          |                                                                   |
| AZOLI_p10668 | 1: 0.00017, 2: 0.00038,<br>3: 0.00030, 4: 0.00065, | 1: 0.00021, 3: 0.00018,<br>4: 0.00015,                                        | AZOBR_180211 | 1: 0.00007, 4: 0.00003,                                                                                  | 1: 0.00019, 2: 0.00036,<br>3: 0.00020,                            |
| AZOLI_p10676 | 1: 0.00006, 2: 0.00006,<br>4: 0.00010,             | 1: 0.00029, 2: 0.00020,<br>3: 0.00040, 4: 0.00032,                            | AZOBR_180212 |                                                                                                          | 3: 0.00006,                                                       |
| AZOLI_p10680 | 2: 0.00025,                                        | 1: 0.00025, 2: 0.00036,<br>4: 0.00021,                                        | AZOBR_180213 |                                                                                                          | 1: 0.00014, 2: 0.00027,<br>3: 0.00013,                            |
| AZOLI_p10684 |                                                    | 1: 0.00013, 3: 0.00009,<br>4: 0.00011,                                        | AZOBR_180214 |                                                                                                          |                                                                   |
| AZOLI_p10719 | 3: 0.00038,                                        |                                                                               | AZOBR_180215 |                                                                                                          |                                                                   |
| AZOLI_p10720 | 3: 0.00008,                                        | 1: 0.00009, 2: 0.00012,<br>3: 0.00010, 4: 0.00008,                            | AZOBR_180216 |                                                                                                          | 3: 0.00075,                                                       |
| AZOLI_p10723 | 3: 0.00033,                                        | 1: 0.00031, 3: 0.00067,<br>4: 0.00027,                                        | AZOBR_180217 |                                                                                                          | 1: 0.00014, 2: 0.00016,<br>3: 0.00027,                            |
| AZOLI_p10752 | 4: 0.00002,                                        | 1: 0.00003, 2: 0.00002,<br>3: 0.00006, 4: 0.00002,                            | AZOBR_180218 |                                                                                                          | 1: 0.00026, 2: 0.00030,<br>3: 0.00048,                            |
| AZOLI_p10762 | 1: 0.00023, 2: 0.00040,<br>3: 0.00014, 4: 0.00057, | 1: 0.00047, 2: 0.00049,<br>3: 0.00048, 4: 0.00040,                            | AZOBR_180221 |                                                                                                          |                                                                   |
| AZOLI_p10765 | 4: 0.00074,                                        |                                                                               | AZOBR_180225 |                                                                                                          | 1: 0.00022, 2: 0.00031,<br>3: 0.00032,                            |
| AZOLI_p10770 | 2: 0.00015,                                        |                                                                               | AZOBR_180226 |                                                                                                          | 1: 0.00030, 2: 0.00019,<br>3: 0.00027,                            |
| AZOLI_p10771 | 1: 0.00004, 2: 0.00014,<br>3: 0.00035, 4: 0.00020, | 1: 0.00049, 2: 0.00043,<br>3: 0.00052, 4: 0.00037,                            | AZOBR_180227 | 1: 0.00022, 2: 0.00028, 3: 0.00027,                                                                      | 1: 0.00028, 2: 0.00055,<br>3: 0.00013,                            |
| AZOLI_p10773 | 4: 0.00041,                                        |                                                                               | AZOBR_180228 |                                                                                                          | 1: 0.00014, 3: 0.00028,                                           |
| AZOLI_p10774 | 1: 0.00018, 4: 0.00011,                            |                                                                               | AZOBR_180232 | 1: 0.00013, 4: 0.00013,                                                                                  |                                                                   |
| AZOLI_p10801 | 1: 0.00031, 2: 0.00031,                            | 1: 0.00016, 2: 0.00023,<br>4: 0.00013,                                        | AZOBR_180235 |                                                                                                          | 1: 0.00009, 2: 0.00020,<br>3: 0.00013,                            |
| AZOLI_p10802 |                                                    | 1: 0.00011, 3: 0.00024,                                                       | AZOBR_180240 |                                                                                                          | 1: 0.00026, 2: 0.00017,<br>3: 0.00015,                            |
| AZOLI_p10806 | 1: 0.00003, 2: 0.00003,                            | 1: 0.00005, 3: 0.00003,<br>4: 0.00010,                                        | AZOBR_180241 |                                                                                                          |                                                                   |
| AZOLI_p10807 | 1: 0.00243, 2: 0.00208,<br>3: 0.00974, 4: 0.00226, | 1: 0.00626, 2: 0.00612,<br>3: 0.00823, 4: 0.00743,                            | AZOBR_180242 | 1: 0.00005, 3: 0.00013, 4: 0.00005,                                                                      | 2: 0.00004,                                                       |
| AZOLI_p10810 | 1: 0.00052, 2: 0.00033,<br>4: 0.00034,             | 1: 0.00033, 2: 0.00045,<br>3: 0.00035, 4: 0.00011,                            | AZOBR_180247 | 2: 0.00009,                                                                                              | 3: 0.00007,                                                       |
| AZOLI_p10811 | 2: 0.00017,                                        | 2: 0.00016,                                                                   | AZOBR_180250 | 1: 0.00020, 2: 0.00033, 3: 0.00022,<br>4: 0.00018, 5: 0.00020,                                           | 1: 0.00022, 2: 0.00020,<br>3: 0.00030,                            |
| AZOLI_p10813 | 1: 0.00017,                                        | 2: 0.00025,                                                                   | AZOBR_180251 | 1: 0.00067, 2: 0.00025, 3: 0.00057,<br>4: 0.00118, 5: 0.00105,                                           | 1: 0.00110, 2: 0.00104,<br>3: 0.00184,                            |
| AZOLI_p10815 | 4: 0.00008,                                        |                                                                               | AZOBR_180253 | 4: 0.00016,                                                                                              | 2: 0.00014, 3: 0.00012,                                           |
| AZOLI_p10820 | 1: 0.00103, 2: 0.00148,<br>3: 0.00169, 4: 0.00117, | 1: 0.00132, 2: 0.00165,<br>3: 0.00158, 4: 0.00127,                            | AZOBR_180254 | 1: 0.00032, 2: 0.00021, 3: 0.00027,<br>4: 0.00027, 5: 0.00060,                                           | 1: 0.00030, 2: 0.00029,<br>3: 0.00044,                            |
| AZOLI_p10840 |                                                    | 4: 0.00001,                                                                   | AZOBR_180255 | 1: 0.00013, 2: 0.00008,                                                                                  |                                                                   |
| AZOLI_p10850 |                                                    | 1: 0.00008, 4: 0.00006,<br>1: 0.00019, 2: 0.00007,<br>3: 0.00029, 4: 0.00020, | AZOBR_180256 | 4: 0.00014, 5: 0.00009,                                                                                  | 1: 0.00009, 2: 0.00010,<br>3: 0.00021,                            |
| AZOLI_p10867 |                                                    |                                                                               | AZOBR_180258 | 1: 0.00012, 2: 0.00011, 4: 0.00019,<br>5: 0.00011,<br>2: 0.00023, 3: 0.00030, 4: 0.00012,<br>5: 0.00012, | 1: 0.00008, 2: 0.00017,<br>1: 0.00151, 2: 0.00070,<br>3: 0.00060, |
| AZOLI_p10870 |                                                    | 1: 0.00012, 2: 0.00012,                                                       | AZOBR_180260 |                                                                                                          | 1: 0.00017, 2: 0.00032,                                           |
| AZOLI_p10873 |                                                    | 2: 0.00003,                                                                   | AZOBR_180261 |                                                                                                          |                                                                   |
| AZOLI_p10885 |                                                    | 4: 0.00009,                                                                   | AZOBR_180262 |                                                                                                          |                                                                   |
| AZOLI_p10886 |                                                    | 3: 0.00014, 4: 0.00017,                                                       | AZOBR_180263 | 4: 0.00003,                                                                                              | 1: 0.00041, 2: 0.00033,<br>3: 0.00064,                            |
| AZOLI_p10930 | 1: 0.00031, 2: 0.00057,                            | 1: 0.00010, 2: 0.00010,                                                       | AZOBR_180265 | 1: 0.00297, 2: 0.00179, 3: 0.00240,<br>4: 0.00177, 5: 0.00217,                                           | 1: 0.00174, 2: 0.00216,<br>3: 0.00160,                            |
| AZOLI_p10931 | 4: 0.00013,                                        |                                                                               | AZOBR_180266 | 1: 0.00082, 2: 0.00135, 3: 0.00104,<br>4: 0.00120, 5: 0.00134,                                           | 1: 0.00196, 2: 0.00104,<br>3: 0.00159,                            |
| AZOLI_p11028 | 1: 0.00063, 2: 0.00029,<br>4: 0.00020,             | 1: 0.00058, 2: 0.00047,<br>3: 0.00052, 4: 0.00034,                            | AZOBR_180269 | 2: 0.00049, 5: 0.00051,                                                                                  | 2: 0.00080, 3: 0.00057,                                           |

|              |                                                                               |                                                    |              |                                                                |                                        |
|--------------|-------------------------------------------------------------------------------|----------------------------------------------------|--------------|----------------------------------------------------------------|----------------------------------------|
| AZOLI_p20005 |                                                                               | 1: 0.00015, 2: 0.00014,<br>3: 0.00016, 4: 0.00017, | AZOBR_180271 |                                                                | 3: 0.00005,                            |
| AZOLI_p20008 |                                                                               | 2: 0.00007, 3: 0.00005,                            | AZOBR_180272 |                                                                | 2: 0.00004, 3: 0.00007,                |
| AZOLI_p20040 | 1: 0.00023, 4: 0.00020,                                                       | 1: 0.00023, 3: 0.00061,<br>4: 0.00069,             | AZOBR_180273 |                                                                |                                        |
| AZOLI_p20161 | 4: 0.00001,                                                                   |                                                    | AZOBR_180274 |                                                                | 3: 0.00004,                            |
| AZOLI_p20180 |                                                                               | 3: 0.00007,                                        | AZOBR_180275 | 1: 0.00003,                                                    | 1: 0.00002, 3: 0.00002,                |
| AZOLI_p20216 | 1: 0.00013, 4: 0.00011,                                                       |                                                    | AZOBR_180276 | 1: 0.00003,                                                    | 1: 0.00005, 2: 0.00002,<br>3: 0.00002, |
| AZOLI_p20222 | 1: 0.00058, 2: 0.00038,<br>3: 0.00010, 4: 0.00065,                            | 1: 0.00041, 2: 0.00033,<br>3: 0.00026, 4: 0.00035, | AZOBR_180277 | 4: 0.00014, 5: 0.00006,                                        | 1: 0.00016, 2: 0.00006,<br>3: 0.00020, |
| AZOLI_p20223 | 1: 0.00009, 4: 0.00008,                                                       |                                                    | AZOBR_180278 | 4: 0.00026, 5: 0.00020,                                        | 1: 0.00035, 2: 0.00029,<br>3: 0.00037, |
| AZOLI_p20224 | 1: 0.00035, 2: 0.00013,<br>4: 0.00038,                                        | 1: 0.00018, 3: 0.00028,<br>4: 0.00011,             | AZOBR_180281 | 4: 0.00008, 5: 0.00008,                                        | 1: 0.00005, 2: 0.00014,<br>3: 0.00010, |
| AZOLI_p20229 | 4: 0.00008,                                                                   | 4: 0.00008,                                        | AZOBR_180282 | 4: 0.00030,                                                    | 1: 0.00014, 3: 0.00013,                |
| AZOLI_p20232 |                                                                               | 4: 0.00007,                                        | AZOBR_180283 | 4: 0.00024, 5: 0.00018,                                        | 3: 0.00017,                            |
| AZOLI_p20236 | 3: 0.00015, 4: 0.00006,                                                       | 1: 0.00032, 2: 0.00041,<br>3: 0.00037, 4: 0.00018, | AZOBR_180290 |                                                                | 2: 0.00006,                            |
| AZOLI_p20249 | 4: 0.00011,                                                                   |                                                    | AZOBR_180300 |                                                                | 3: 0.00010,                            |
| AZOLI_p20272 |                                                                               | 2: 0.00019,                                        | AZOBR_180320 |                                                                |                                        |
| AZOLI_p20275 |                                                                               | 1: 0.00049, 2: 0.00054,<br>3: 0.00066, 4: 0.00059, | AZOBR_190005 |                                                                |                                        |
| AZOLI_p20283 | 2: 0.00007, 4: 0.00006,                                                       |                                                    | AZOBR_190013 |                                                                |                                        |
| AZOLI_p20288 | 1: 0.00004, 2: 0.00009,<br>3: 0.00016,                                        | 1: 0.00049, 2: 0.00028,<br>3: 0.00038, 4: 0.00023, | AZOBR_190023 |                                                                | 3: 0.00005,                            |
| AZOLI_p20296 |                                                                               | 4: 0.00011,                                        | AZOBR_200002 |                                                                | 2: 0.00004, 3: 0.00003,                |
| AZOLI_p20307 | 2: 0.00018,                                                                   |                                                    | AZOBR_200014 |                                                                |                                        |
| AZOLI_p20311 | 2: 0.00004,                                                                   | 1: 0.00004, 4: 0.00004,                            | AZOBR_200015 |                                                                |                                        |
| AZOLI_p20319 | 1: 0.00022,                                                                   | 1: 0.00042, 2: 0.00044,<br>3: 0.00028, 4: 0.00035, | AZOBR_200026 | 4: 0.00011,                                                    |                                        |
| AZOLI_p20320 | 1: 0.00050, 2: 0.00063,<br>3: 0.00070, 4: 0.00032,                            | 1: 0.00152, 2: 0.00134,<br>3: 0.00081, 4: 0.00092, | AZOBR_200027 |                                                                |                                        |
| AZOLI_p20329 | 1: 0.00009, 4: 0.00011,<br>1: 0.00013, 2: 0.00015,<br>3: 0.00006, 4: 0.00030, | 2: 0.00021, 3: 0.00018,<br>4: 0.00011,             | AZOBR_200028 | 3: 0.00017, 4: 0.00017, 5: 0.00007,                            | 1: 0.00016, 2: 0.00015,<br>3: 0.00006, |
| AZOLI_p20332 |                                                                               | 1: 0.00004, 2: 0.00006,<br>3: 0.00007, 4: 0.00011, | AZOBR_200029 |                                                                |                                        |
| AZOLI_p20335 |                                                                               | 2: 0.00013, 4: 0.00011,                            | AZOBR_200030 | 3: 0.00007, 4: 0.00005,                                        | 3: 0.00012,                            |
| AZOLI_p20336 |                                                                               | 4: 0.00004,                                        | AZOBR_200031 |                                                                | 2: 0.00010,                            |
| AZOLI_p20337 | 4: 0.00029,                                                                   |                                                    | AZOBR_200034 | 1: 0.00020, 3: 0.00026, 4: 0.00083,<br>5: 0.00076,             | 1: 0.00019, 3: 0.00106,                |
| AZOLI_p20340 | 1: 0.00031, 4: 0.00014,                                                       | 2: 0.00023, 3: 0.00017,<br>4: 0.00027,             | AZOBR_200035 | 2: 0.00006, 3: 0.00004, 4: 0.00009,<br>5: 0.00005,             | 1: 0.00003, 3: 0.00004,                |
| AZOLI_p20346 |                                                                               | 1: 0.00015, 2: 0.00007,<br>3: 0.00023, 4: 0.00028, | AZOBR_200038 |                                                                | 1: 0.00010, 3: 0.00018,                |
| AZOLI_p20349 |                                                                               | 4: 0.00035,                                        | AZOBR_200039 |                                                                | 3: 0.00015,                            |
| AZOLI_p20353 | 1: 0.00014, 3: 0.00019,                                                       |                                                    | AZOBR_200072 |                                                                |                                        |
| AZOLI_p20361 | 1: 0.00004, 2: 0.00004,                                                       |                                                    | AZOBR_200075 |                                                                | 2: 0.00031,                            |
| AZOLI_p20366 | 1: 0.00006,                                                                   |                                                    | AZOBR_200083 | 1: 0.00089, 2: 0.00109, 3: 0.00090,<br>4: 0.00122, 5: 0.00110, |                                        |
| AZOLI_p20367 | 1: 0.00011, 2: 0.00011,<br>1: 0.00053, 2: 0.00046,<br>4: 0.00020,             |                                                    | AZOBR_200128 | 2: 0.00012, 4: 0.00014, 5: 0.00014,                            | 1: 0.00018, 2: 0.00015,<br>3: 0.00021, |
| AZOLI_p20370 |                                                                               |                                                    | AZOBR_200130 |                                                                | 1: 0.00010, 3: 0.00023,                |
| AZOLI_p20381 |                                                                               | 2: 0.00012, 3: 0.00005,<br>4: 0.00011,             | AZOBR_200131 |                                                                | 1: 0.00022, 2: 0.00010,<br>3: 0.00008, |
| AZOLI_p20404 |                                                                               | 4: 0.00006,                                        | AZOBR_200133 | 1: 0.00051, 2: 0.00030, 3: 0.00053,<br>4: 0.00054, 5: 0.00047, | 1: 0.00025, 2: 0.00102,<br>3: 0.00049, |
| AZOLI_p20409 |                                                                               | 4: 0.00007,                                        | AZOBR_200135 | 1: 0.00141, 2: 0.00174, 3: 0.00202,<br>4: 0.00108, 5: 0.00066, | 1: 0.00077, 2: 0.00092,<br>3: 0.00047, |
| AZOLI_p20418 | 1: 0.00039, 2: 0.00019,<br>3: 0.00217, 4: 0.00022,                            | 1: 0.00052, 2: 0.00056,<br>3: 0.00041, 4: 0.00011, | AZOBR_200138 | 1: 0.00167, 2: 0.00059, 3: 0.00043,<br>4: 0.00034,             | 1: 0.00032, 2: 0.00109,                |
| AZOLI_p20424 |                                                                               | 3: 0.00013, 4: 0.00008,                            | AZOBR_200139 | 1: 0.00034, 2: 0.00042, 3: 0.00051,<br>4: 0.00032, 5: 0.00021, | 1: 0.00014, 2: 0.00016,<br>3: 0.00005, |
| AZOLI_p20433 |                                                                               | 4: 0.00006,                                        | AZOBR_200141 | 1: 0.00054,                                                    | 2: 0.00026, 3: 0.00017,                |
| AZOLI_p20459 | 1: 0.00170, 2: 0.00185,<br>3: 0.00322, 4: 0.00204,                            | 1: 0.00181, 2: 0.00146,<br>3: 0.00203, 4: 0.00223, | AZOBR_200143 |                                                                | 3: 0.00013,                            |
| AZOLI_p20460 | 3: 0.00007,                                                                   |                                                    | AZOBR_200145 |                                                                | 1: 0.00017, 2: 0.00006,<br>3: 0.00016, |
| AZOLI_p20464 | 1: 0.00220, 2: 0.00238,<br>3: 0.00483, 4: 0.00327,                            | 1: 0.00486, 2: 0.00471,<br>3: 0.00496, 4: 0.00457, | AZOBR_200151 |                                                                | 1: 0.00015, 3: 0.00003,                |
| AZOLI_p20471 |                                                                               | 1: 0.00032, 2: 0.00040,<br>3: 0.00020, 4: 0.00019, | AZOBR_200156 |                                                                | 1: 0.00020, 2: 0.00008,<br>3: 0.00040, |
| AZOLI_p20478 | 1: 0.00014, 4: 0.00009,                                                       |                                                    | AZOBR_200158 | 1: 0.00014, 3: 0.00014,                                        | 1: 0.00004, 2: 0.00004,                |
| AZOLI_p20517 | 4: 0.00002,                                                                   |                                                    | AZOBR_200160 |                                                                |                                        |
| AZOLI_p20523 | 1: 0.00056, 2: 0.00092,<br>3: 0.00079, 4: 0.00124,                            | 1: 0.00137, 2: 0.00148,<br>3: 0.00137, 4: 0.00145, | AZOBR_200161 | 2: 0.00015, 5: 0.00018,                                        | 1: 0.00073, 2: 0.00019,<br>3: 0.00168, |
| AZOLI_p20526 | 3: 0.00010,                                                                   |                                                    | AZOBR_200162 | 1: 0.00437, 2: 0.00223, 3: 0.00353,<br>4: 0.00304, 5: 0.00292, | 1: 0.00560, 2: 0.00683,<br>3: 0.00364, |
| AZOLI_p20528 |                                                                               | 4: 0.00005,                                        | AZOBR_200163 | 1: 0.00091, 2: 0.00097, 3: 0.00161,<br>4: 0.00143, 5: 0.00169, | 1: 0.00147, 2: 0.00117,<br>3: 0.00161, |
| AZOLI_p20529 |                                                                               | 1: 0.00064, 2: 0.00110,<br>3: 0.00113, 4: 0.00042, | AZOBR_200164 | 1: 0.00130, 2: 0.00154, 3: 0.00127,<br>4: 0.00161, 5: 0.00172, | 1: 0.00259, 2: 0.00240,<br>3: 0.00270, |
| AZOLI_p20530 |                                                                               | 1: 0.00013, 2: 0.00025,<br>4: 0.00011,             | AZOBR_200166 | 1: 0.00003, 2: 0.00016, 3: 0.00016,<br>4: 0.00016, 5: 0.00013, | 1: 0.00008, 2: 0.00015,<br>3: 0.00016, |
| AZOLI_p20536 | 3: 0.00008,                                                                   | 1: 0.00044, 2: 0.00039,<br>3: 0.00057, 4: 0.00039, | AZOBR_200167 | 1: 0.00115, 2: 0.00074, 3: 0.00107,<br>4: 0.00151, 5: 0.00187, | 1: 0.00083, 2: 0.00071,<br>3: 0.00106, |
| AZOLI_p20537 |                                                                               | 1: 0.00096, 2: 0.00072,<br>4: 0.00055,             | AZOBR_200168 |                                                                |                                        |
| AZOLI_p20543 |                                                                               | 3: 0.00014,                                        | AZOBR_200172 | 2: 0.00007, 3: 0.00006, 4: 0.00013,                            | 3: 0.00005,                            |

|              |                                                    |                                                    |               |                                                                |                                        |
|--------------|----------------------------------------------------|----------------------------------------------------|---------------|----------------------------------------------------------------|----------------------------------------|
|              |                                                    |                                                    |               | 5: 0.00013,                                                    |                                        |
| AZOLI_p20547 | 1: 0.00016, 2: 0.00018,<br>3: 0.00009, 4: 0.00014, |                                                    | AZOBR_200174  | 1: 0.00038, 2: 0.00027, 3: 0.00026,<br>4: 0.00057, 5: 0.00047, | 2: 0.00017, 3: 0.00028,                |
| AZOLI_p20548 | 1: 0.00011, 4: 0.00015,                            |                                                    | AZOBR_200175  |                                                                |                                        |
| AZOLI_p20556 | 4: 0.00018,                                        |                                                    | AZOBR_200176  | 4: 0.00007, 5: 0.00007,                                        | 1: 0.00019, 2: 0.00022,<br>3: 0.00019, |
| AZOLI_p20567 |                                                    | 1: 0.00016, 2: 0.00018,<br>3: 0.00017, 4: 0.00014, | AZOBR_200178  |                                                                |                                        |
| AZOLI_p20572 | 4: 0.00008,                                        | 1: 0.00014, 3: 0.00010,                            | AZOBR_200179  | 1: 0.00047, 2: 0.00052, 3: 0.00057,<br>4: 0.00027, 5: 0.00043, | 1: 0.00055, 2: 0.00060,<br>3: 0.00066, |
| AZOLI_p20573 | 3: 0.00043, 4: 0.00018,                            | 1: 0.00041, 2: 0.00025,<br>3: 0.00027, 4: 0.00026, | AZOBR_200181  | 1: 0.00093, 2: 0.00272, 3: 0.00170,<br>4: 0.00231, 5: 0.00247, | 1: 0.00206, 2: 0.00151,<br>3: 0.00116, |
| AZOLI_p20577 | 3: 0.00016,                                        | 1: 0.00027, 2: 0.00033,<br>3: 0.00020, 4: 0.00026, | AZOBR_200186  | 1: 0.00010, 2: 0.00014, 3: 0.00009,<br>4: 0.00014,             | 1: 0.00030, 3: 0.00032,                |
| AZOLI_p20578 | 1: 0.00008, 2: 0.00020,<br>3: 0.00065, 4: 0.00008, | 1: 0.00074, 2: 0.00074,<br>3: 0.00070, 4: 0.00072, | AZOBR_200187  | 5: 0.00005,                                                    |                                        |
| AZOLI_p20580 | 1: 0.00016, 4: 0.00007,                            | 2: 0.00011,                                        | AZOBR_200188  | 1: 0.00022, 2: 0.00032, 3: 0.00046,<br>4: 0.00027, 5: 0.00025, | 1: 0.00005, 2: 0.00008,<br>3: 0.00009, |
| AZOLI_p20587 | 1: 0.00014,                                        | 1: 0.00049, 2: 0.00040,<br>3: 0.00044, 4: 0.00039, | AZOBR_200189  |                                                                |                                        |
| AZOLI_p20590 | 2: 0.00010, 4: 0.00012,                            |                                                    | AZOBR_200193  |                                                                |                                        |
| AZOLI_p20595 | 3: 0.00030,                                        |                                                    | AZOBR_200194  |                                                                |                                        |
| AZOLI_p20603 | 3: 0.00034,                                        |                                                    | AZOBR_200195  |                                                                | 1: 0.00067, 2: 0.00046,<br>3: 0.00046, |
| AZOLI_p20620 | 3: 0.00024,                                        |                                                    | AZOBR_200196  |                                                                |                                        |
| AZOLI_p20627 |                                                    | 1: 0.00028, 4: 0.00024,                            | AZOBR_200199  | 3: 0.00036,                                                    | 1: 0.00045, 2: 0.00062,<br>3: 0.00035, |
| AZOLI_p20638 | 1: 0.00016, 2: 0.00010,<br>4: 0.00031,             | 1: 0.00026, 2: 0.00029,<br>3: 0.00042, 4: 0.00025, | AZOBR_200200  | 1: 0.00108, 2: 0.00085, 3: 0.00112,<br>4: 0.00058, 5: 0.00058, | 1: 0.00061, 2: 0.00035,<br>3: 0.00045, |
| AZOLI_p20643 | 2: 0.00011, 4: 0.00010,                            | 2: 0.00014, 3: 0.00016,<br>4: 0.00016,             | AZOBR_200202  |                                                                | 1: 0.00009, 3: 0.00008,                |
| AZOLI_p20656 | 1: 0.00016, 4: 0.00023,                            |                                                    | AZOBR_200203  |                                                                |                                        |
| AZOLI_p20658 | 1: 0.00013, 4: 0.00007,                            | 4: 0.00007,                                        | AZOBR_200204  | 4: 0.00004,                                                    | 1: 0.00003, 2: 0.00006,<br>3: 0.00013, |
| AZOLI_p20662 |                                                    | 4: 0.00006,                                        | AZOBR_200206  | 3: 0.00012,                                                    |                                        |
| AZOLI_p20681 |                                                    | 2: 0.00004,                                        | AZOBR_200207  |                                                                | 3: 0.00015,                            |
| AZOLI_p20685 | 3: 0.00019, 4: 0.00008,                            |                                                    | AZOBR_200208  | 3: 0.00006, 4: 0.00010, 5: 0.00008,                            | 3: 0.00009,                            |
| AZOLI_p20688 |                                                    | 1: 0.00015, 2: 0.00011,<br>3: 0.00020, 4: 0.00014, | AZOBR_200209  |                                                                | 3: 0.00063,                            |
| AZOLI_p20691 | 1: 0.00009, 2: 0.00019,                            | 4: 0.00008,                                        | AZOBR_200210  |                                                                |                                        |
| AZOLI_p20692 | 1: 0.00008, 4: 0.00009,                            |                                                    | AZOBR_200212  |                                                                |                                        |
| AZOLI_p20700 | 4: 0.00008,                                        | 1: 0.00033, 2: 0.00016,<br>3: 0.00028, 4: 0.00025, | AZOBR_200220  |                                                                |                                        |
| AZOLI_p20707 | 1: 0.00146, 2: 0.00082,<br>3: 0.00057, 4: 0.00136, | 2: 0.00028, 4: 0.00010,                            | AZOBR_200223  | 4: 0.00038, 5: 0.00013,                                        | 3: 0.00017,                            |
| AZOLI_p20715 |                                                    | 2: 0.00006, 4: 0.00005,                            | AZOBR_200225  | 1: 0.00067, 2: 0.00038, 3: 0.00052,<br>4: 0.00046, 5: 0.00061, | 1: 0.00006, 2: 0.00004,<br>3: 0.00015, |
| AZOLI_p20731 | 1: 0.00019, 2: 0.00018,<br>3: 0.00010, 4: 0.00014, | 1: 0.00037, 2: 0.00037,<br>4: 0.00003,             | AZOBR_200226  |                                                                | 2: 0.00013,                            |
| AZOLI_p20742 | 1: 0.00011, 2: 0.00008,<br>4: 0.00013,             | 1: 0.00023, 2: 0.00015,<br>3: 0.00008, 4: 0.00010, | AZOBR_p110001 | 1: 0.00050, 2: 0.00040, 3: 0.00038,<br>4: 0.00042, 5: 0.00027, | 1: 0.00036, 2: 0.00045,<br>3: 0.00035, |
| AZOLI_p20743 |                                                    | 3: 0.00014,                                        | AZOBR_p110002 | 1: 0.00268, 2: 0.00240, 3: 0.00258,<br>4: 0.00172, 5: 0.00224, | 1: 0.00166, 2: 0.00196,<br>3: 0.00155, |
| AZOLI_p20745 | 1: 0.00180, 2: 0.00099,<br>4: 0.00155,             |                                                    | AZOBR_p110003 | 1: 0.00064, 2: 0.00048, 3: 0.00035,<br>4: 0.00050, 5: 0.00050, | 1: 0.00009, 2: 0.00007,<br>3: 0.00023, |
| AZOLI_p20747 | 1: 0.00027, 2: 0.00011,<br>4: 0.00037,             | 3: 0.00017, 4: 0.00014,                            | AZOBR_p110005 | 4: 0.00018,                                                    |                                        |
| AZOLI_p30023 |                                                    | 2: 0.00018,                                        | AZOBR_p110006 | 1: 0.00011, 3: 0.00019, 4: 0.00013,<br>5: 0.00008,             | 3: 0.00007,                            |
| AZOLI_p30032 |                                                    | 1: 0.00019, 4: 0.00011,                            | AZOBR_p110009 | 3: 0.00006, 4: 0.00017,                                        | 2: 0.00008,                            |
| AZOLI_p30037 |                                                    | 2: 0.00031, 3: 0.00017,<br>4: 0.00014,             | AZOBR_p110010 |                                                                | 2: 0.00007,                            |
| AZOLI_p30039 | 3: 0.00098,                                        | 1: 0.00071, 2: 0.00118,<br>3: 0.00102, 4: 0.00099, | AZOBR_p110011 |                                                                | 3: 0.00002,                            |
| AZOLI_p30044 | 1: 0.00010, 4: 0.00029,                            | 4: 0.00006,                                        | AZOBR_p110013 | 4: 0.00006,                                                    | 1: 0.00004, 2: 0.00007,<br>3: 0.00025, |
| AZOLI_p30062 |                                                    | 4: 0.00021,                                        | AZOBR_p110016 |                                                                |                                        |
| AZOLI_p30068 |                                                    | 1: 0.00013, 3: 0.00007,<br>4: 0.00005,             | AZOBR_p110017 | 3: 0.00009, 4: 0.00010,                                        |                                        |
| AZOLI_p30069 |                                                    | 1: 0.00004, 2: 0.00004,<br>3: 0.00021, 4: 0.00009, | AZOBR_p110018 | 5: 0.00009,                                                    |                                        |
| AZOLI_p30078 | 4: 0.00006,                                        |                                                    | AZOBR_p110019 | 1: 0.00142, 2: 0.00266, 3: 0.00226,<br>4: 0.00219, 5: 0.00159, | 1: 0.00204, 2: 0.00297,<br>3: 0.00154, |
| AZOLI_p30082 | 2: 0.00006,                                        | 1: 0.00010,                                        | AZOBR_p110020 | 1: 0.00007, 3: 0.00011, 4: 0.00009,<br>5: 0.00007,             |                                        |
| AZOLI_p30083 |                                                    | 4: 0.00011,                                        | AZOBR_p110022 |                                                                | 1: 0.00020, 3: 0.00019,                |
| AZOLI_p30092 | 2: 0.00006,                                        | 1: 0.00006, 2: 0.00006,<br>4: 0.00005,             | AZOBR_p110023 |                                                                | 2: 0.00017, 3: 0.00019,                |
| AZOLI_p30106 | 1: 0.00017, 2: 0.00039,<br>4: 0.00054,             | 1: 0.00092, 2: 0.00061,<br>3: 0.00082, 4: 0.00072, | AZOBR_p110024 | 5: 0.00011,                                                    |                                        |
| AZOLI_p30108 | 3: 0.00006, 4: 0.00002,                            | 4: 0.00004,                                        | AZOBR_p110027 | 3: 0.00014, 4: 0.00011,                                        | 2: 0.00012, 3: 0.00010,                |
| AZOLI_p30109 | 1: 0.00034, 2: 0.00039,<br>3: 0.00018, 4: 0.00052, | 1: 0.00083, 2: 0.00084,<br>3: 0.00111, 4: 0.00089, | AZOBR_p110028 |                                                                | 3: 0.00010,                            |
| AZOLI_p30114 | 1: 0.00093, 4: 0.00054,                            | 1: 0.00021, 2: 0.00081,<br>3: 0.00033, 4: 0.00036, | AZOBR_p110029 |                                                                |                                        |
| AZOLI_p30115 | 1: 0.00049, 2: 0.00040,<br>3: 0.00125, 4: 0.00055, | 1: 0.00090, 2: 0.00067,<br>3: 0.00074, 4: 0.00055, | AZOBR_p110036 | 1: 0.00013, 2: 0.00010, 3: 0.00017,<br>4: 0.00039, 5: 0.00032, | 1: 0.00005, 2: 0.00011,<br>3: 0.00011, |
| AZOLI_p30117 |                                                    | 1: 0.00028, 2: 0.00016,<br>4: 0.00010,             | AZOBR_p110045 |                                                                |                                        |
| AZOLI_p30118 |                                                    | 3: 0.00005, 4: 0.00004,                            | AZOBR_p110048 |                                                                | 3: 0.00003,                            |

|              |                                                                   |                                                    |               |                                                                |                                        |
|--------------|-------------------------------------------------------------------|----------------------------------------------------|---------------|----------------------------------------------------------------|----------------------------------------|
| AZOLI_p30120 | 1: 0.00080, 2: 0.00070,<br>4: 0.00057,                            |                                                    | AZOBR_p110049 | 1: 0.00014,                                                    |                                        |
| AZOLI_p30126 | 1: 0.00004, 2: 0.00014,                                           | 1: 0.00018, 2: 0.00020,<br>3: 0.00010, 4: 0.00008, | AZOBR_p110050 | 1: 0.00051, 2: 0.00031, 3: 0.00040,<br>4: 0.00043, 5: 0.00030, | 1: 0.00058, 2: 0.00080,<br>3: 0.00076, |
| AZOLI_p30127 | 1: 0.00029, 2: 0.00034,<br>4: 0.00029,                            | 1: 0.00030, 3: 0.00026,<br>4: 0.00021,             | AZOBR_p110058 |                                                                | 3: 0.00003,                            |
| AZOLI_p30128 | 4: 0.00007,                                                       |                                                    | AZOBR_p110066 |                                                                |                                        |
| AZOLI_p30129 | 1: 0.00157, 2: 0.00120,<br>3: 0.00089, 4: 0.00108,                | 1: 0.00050, 2: 0.00027,<br>3: 0.00030, 4: 0.00036, | AZOBR_p110069 | 1: 0.00015, 3: 0.00008,                                        |                                        |
| AZOLI_p30135 |                                                                   | 1: 0.00005,                                        | AZOBR_p110070 | 1: 0.00137, 2: 0.00109, 3: 0.00094,<br>4: 0.00168, 5: 0.00140, | 1: 0.00164, 2: 0.00203,<br>3: 0.00220, |
| AZOLI_p30138 | 1: 0.00016, 2: 0.00035,<br>4: 0.00039,                            | 1: 0.00035, 2: 0.00023,<br>3: 0.00023, 4: 0.00023, | AZOBR_p110073 |                                                                |                                        |
| AZOLI_p30144 |                                                                   | 1: 0.00015, 2: 0.00033,<br>3: 0.00026, 4: 0.00018, | AZOBR_p110074 | 3: 0.00004,                                                    |                                        |
| AZOLI_p30151 | 1: 0.00158, 2: 0.00160,<br>3: 0.00105, 4: 0.00161,                | 1: 0.00329, 2: 0.00305,<br>3: 0.00312, 4: 0.00320, | AZOBR_p110075 |                                                                | 2: 0.00023,                            |
| AZOLI_p30154 | 1: 0.00016, 4: 0.00014,                                           | 3: 0.00018,                                        | AZOBR_p110076 |                                                                |                                        |
| AZOLI_p30165 | 1: 0.00017, 2: 0.00012,<br>3: 0.00016, 4: 0.00025,                | 1: 0.00006, 2: 0.00006,<br>3: 0.00013, 4: 0.00013, | AZOBR_p110077 |                                                                | 2: 0.00006, 3: 0.00003,                |
| AZOLI_p30170 | 4: 0.00003,                                                       |                                                    | AZOBR_p110079 | 1: 0.00047, 2: 0.00053, 3: 0.00044,<br>4: 0.00071, 5: 0.00051, | 1: 0.00066, 2: 0.00078,<br>3: 0.00075, |
| AZOLI_p30171 | 1: 0.00004, 4: 0.00003,<br>1: 0.00025, 2: 0.00025,<br>4: 0.00009, | 2: 0.00020, 4: 0.00009,                            | AZOBR_p110080 | 2: 0.00005, 3: 0.00003,                                        | 1: 0.00009, 2: 0.00015,<br>3: 0.00005, |
| AZOLI_p30175 |                                                                   |                                                    | AZOBR_p110090 | 1: 0.00077, 4: 0.00015, 5: 0.00030,                            | 3: 0.00021,                            |
| AZOLI_p30178 |                                                                   | 4: 0.00003,                                        | AZOBR_p110101 |                                                                |                                        |
| AZOLI_p30182 | 4: 0.00008,                                                       |                                                    | AZOBR_p110103 |                                                                |                                        |
| AZOLI_p30185 | 1: 0.00008, 2: 0.00015,<br>4: 0.00010,                            | 1: 0.00008, 4: 0.00007,                            | AZOBR_p110104 | 1: 0.00036, 3: 0.00031,                                        |                                        |
| AZOLI_p30186 | 4: 0.00020,                                                       |                                                    | AZOBR_p110105 | 4: 0.00006, 5: 0.00006,                                        |                                        |
| AZOLI_p30187 | 1: 0.00055, 2: 0.00018,<br>3: 0.00015, 4: 0.00019,                | 1: 0.00041, 2: 0.00021,<br>3: 0.00043, 4: 0.00041, | AZOBR_p110106 | 1: 0.00197, 2: 0.00138, 3: 0.00104,<br>4: 0.00184, 5: 0.00136, | 1: 0.00056, 2: 0.00085,<br>3: 0.00069, |
| AZOLI_p30190 | 1: 0.00027,                                                       |                                                    | AZOBR_p110107 | 1: 0.00074, 2: 0.00031, 3: 0.00047,<br>4: 0.00058, 5: 0.00044, | 1: 0.00012, 2: 0.00012,<br>3: 0.00012, |
| AZOLI_p30194 | 2: 0.00005, 4: 0.00004,                                           |                                                    | AZOBR_p110108 | 1: 0.00021, 2: 0.00009, 3: 0.00021,<br>4: 0.00019,             |                                        |
| AZOLI_p30197 | 1: 0.00014, 2: 0.00017,<br>4: 0.00015,                            | 1: 0.00015, 2: 0.00008,<br>4: 0.00007,             | AZOBR_p110109 | 1: 0.00028, 2: 0.00025, 3: 0.00016,<br>4: 0.00045, 5: 0.00039, | 1: 0.00012,                            |
| AZOLI_p30198 | 1: 0.00023, 3: 0.00044,<br>4: 0.00047,                            | 2: 0.00038,                                        | AZOBR_p110110 |                                                                | 3: 0.00020,                            |
| AZOLI_p30205 | 1: 0.00058, 2: 0.00135,<br>4: 0.00066,                            |                                                    | AZOBR_p110117 | 1: 0.00005, 3: 0.00008, 5: 0.00003,                            | 1: 0.00002, 3: 0.00002,                |
| AZOLI_p30206 | 1: 0.00058, 2: 0.00041,<br>3: 0.00010, 4: 0.00012,                | 1: 0.00021, 2: 0.00020,<br>3: 0.00026, 4: 0.00006, | AZOBR_p110118 | 1: 0.00173, 2: 0.00366, 3: 0.00177,<br>4: 0.00190, 5: 0.00326, | 1: 0.00694, 2: 0.00915,<br>3: 0.00515, |
| AZOLI_p30210 |                                                                   | 1: 0.00020, 2: 0.00020,<br>3: 0.00026, 4: 0.00024, | AZOBR_p110121 | 1: 0.00016, 4: 0.00011,                                        | 1: 0.00015,                            |
| AZOLI_p30224 | 1: 0.00028, 2: 0.00028,<br>4: 0.00007,                            | 1: 0.00008, 2: 0.00016,                            | AZOBR_p110124 | 5: 0.00039,                                                    |                                        |
| AZOLI_p30235 | 1: 0.00034, 2: 0.00029,<br>4: 0.00050,                            | 1: 0.00020, 2: 0.00056,<br>3: 0.00036, 4: 0.00025, | AZOBR_p110126 |                                                                | 1: 0.00054, 2: 0.00086,                |
| AZOLI_p30238 | 1: 0.00006, 2: 0.00009,<br>4: 0.00015,                            | 1: 0.00006, 2: 0.00012,<br>4: 0.00010,             | AZOBR_p110127 | 3: 0.00009,                                                    | 1: 0.00055, 2: 0.00081,<br>3: 0.00038, |
| AZOLI_p30239 | 1: 0.00024, 2: 0.00035,<br>3: 0.00011, 4: 0.00039,                | 1: 0.00069, 2: 0.00069,<br>3: 0.00065, 4: 0.00082, | AZOBR_p110128 |                                                                |                                        |
| AZOLI_p30242 | 1: 0.00065, 2: 0.00038,<br>3: 0.00068, 4: 0.00033,                | 1: 0.00027, 2: 0.00032,<br>3: 0.00023, 4: 0.00023, | AZOBR_p110131 | 1: 0.00290, 2: 0.00214, 3: 0.00233,<br>4: 0.00172, 5: 0.00145, | 1: 0.00444, 2: 0.00593,<br>3: 0.00271, |
| AZOLI_p30243 | 1: 0.00012,                                                       | 2: 0.00008, 4: 0.00011,                            | AZOBR_p110136 |                                                                |                                        |
| AZOLI_p30247 | 1: 0.00016, 2: 0.00013,<br>3: 0.00035, 4: 0.00028,                | 1: 0.00037, 2: 0.00026,<br>3: 0.00029, 4: 0.00049, | AZOBR_p110141 |                                                                | 3: 0.00024,                            |
| AZOLI_p30253 | 2: 0.00009, 4: 0.00012,                                           |                                                    | AZOBR_p110144 | 1: 0.00010, 2: 0.00011, 3: 0.00014,<br>4: 0.00013, 5: 0.00022, | 1: 0.00006, 2: 0.00012,<br>3: 0.00020, |
| AZOLI_p30255 | 1: 0.00041, 2: 0.00082,<br>3: 0.00102, 4: 0.00160,                | 1: 0.00083, 2: 0.00062,<br>3: 0.00107, 4: 0.00082, | AZOBR_p110145 |                                                                |                                        |
| AZOLI_p30256 | 1: 0.00030, 2: 0.00023,<br>4: 0.00037,                            | 1: 0.00036, 2: 0.00045,<br>3: 0.00068, 4: 0.00040, | AZOBR_p110146 | 1: 0.00317, 2: 0.00632, 3: 0.00357,<br>4: 0.00458, 5: 0.00592, | 1: 0.01238, 2: 0.01154,<br>3: 0.00832, |
| AZOLI_p30257 |                                                                   | 4: 0.00005,                                        | AZOBR_p110147 |                                                                |                                        |
| AZOLI_p30258 | 1: 0.00015, 2: 0.00022,<br>4: 0.00019,                            | 3: 0.00024, 4: 0.00013,                            | AZOBR_p110150 |                                                                |                                        |
| AZOLI_p30267 | 1: 0.00011,                                                       | 4: 0.00010,                                        | AZOBR_p110151 | 1: 0.00035, 2: 0.00045, 3: 0.00032,<br>4: 0.00068, 5: 0.00060, | 1: 0.00043, 2: 0.00029,<br>3: 0.00060, |
| AZOLI_p30268 | 1: 0.00052, 3: 0.00059,<br>4: 0.00099,                            | 1: 0.00053, 2: 0.00113,<br>3: 0.00045, 4: 0.00045, | AZOBR_p120003 |                                                                | 1: 0.00026,                            |
| AZOLI_p30270 | 1: 0.00089, 2: 0.00053,<br>3: 0.00073, 4: 0.00045,                | 1: 0.00093, 2: 0.00132,<br>3: 0.00072, 4: 0.00095, | AZOBR_p120003 |                                                                | 1: 0.00025,                            |
| AZOLI_p30274 | 1: 0.00014, 2: 0.00010,<br>3: 0.00010, 4: 0.00030,                | 1: 0.00056, 2: 0.00054,<br>3: 0.00063, 4: 0.00051, | AZOBR_p120035 |                                                                |                                        |
| AZOLI_p30277 | 2: 0.00009,                                                       |                                                    | AZOBR_p120049 | 4: 0.00010,                                                    |                                        |
| AZOLI_p30282 | 1: 0.00019, 2: 0.00030,<br>3: 0.00184, 4: 0.00007,                | 1: 0.00146, 2: 0.00114,<br>3: 0.00180, 4: 0.00175, | AZOBR_p120068 | 2: 0.00014,                                                    | 3: 0.00020,                            |
| AZOLI_p30282 | 1: 0.00038, 2: 0.00043,<br>3: 0.00102, 4: 0.00042,                | 1: 0.00177, 2: 0.00153,<br>3: 0.00209, 4: 0.00182, | AZOBR_p120069 | 1: 0.00005, 2: 0.00011, 3: 0.00013,<br>4: 0.00016, 5: 0.00007, | 1: 0.00002, 2: 0.00008,<br>3: 0.00004, |
| AZOLI_p30283 |                                                                   | 4: 0.00017,                                        | AZOBR_p120080 | 1: 0.00026, 2: 0.00039, 3: 0.00045,<br>4: 0.00139, 5: 0.00097, | 1: 0.00073, 2: 0.00070,<br>3: 0.00142, |
| AZOLI_p30290 | 3: 0.00033, 4: 0.00003,                                           | 1: 0.00027, 2: 0.00023,<br>3: 0.00040, 4: 0.00019, | AZOBR_p120082 | 4: 0.00002,                                                    |                                        |
| AZOLI_p30291 |                                                                   | 4: 0.00007,                                        | AZOBR_p120085 |                                                                | 2: 0.00020,                            |
| AZOLI_p30297 |                                                                   | 1: 0.00004, 2: 0.00006,<br>3: 0.00005, 4: 0.00004, | AZOBR_p120086 | 1: 0.00006, 2: 0.00011, 3: 0.00011,<br>4: 0.00013, 5: 0.00011, | 3: 0.00008,                            |
| AZOLI_p30313 | 1: 0.00007, 2: 0.00004,                                           | 1: 0.00015, 2: 0.00014,                            | AZOBR_p120088 | 4: 0.00003,                                                    | 1: 0.00013, 2: 0.00003,                |

|              |                                                 |                                                 |               |                                                             |                                     |
|--------------|-------------------------------------------------|-------------------------------------------------|---------------|-------------------------------------------------------------|-------------------------------------|
|              | 3: 0.00010, 4: 0.00008,                         | 3: 0.00018, 4: 0.00017,                         |               | 1: 0.00010, 3: 0.00009, 4: 0.00007, 5: 0.00007,             | 3: 0.00008,                         |
| AZOLI_p30314 |                                                 | 1: 0.00009,                                     | AZOBR_p120089 |                                                             | 3: 0.00006,                         |
| AZOLI_p30315 |                                                 | 1: 0.00051, 2: 0.00067, 3: 0.00049, 4: 0.00051, | AZOBR_p120091 |                                                             |                                     |
| AZOLI_p30318 |                                                 | 1: 0.00070, 2: 0.00085, 3: 0.00114, 4: 0.00070, | AZOBR_p120092 |                                                             |                                     |
| AZOLI_p30320 |                                                 | 4: 0.00007,                                     | AZOBR_p120093 | 1: 0.00621, 2: 0.00300, 3: 0.00314, 4: 0.00279, 5: 0.00189, | 1: 0.00310, 2: 0.00268, 3: 0.00171, |
| AZOLI_p30323 | 1: 0.00013,                                     |                                                 | AZOBR_p120094 | 1: 0.00023, 2: 0.00021,                                     | 3: 0.00022,                         |
| AZOLI_p30331 | 1: 0.00328, 2: 0.00275, 3: 0.00175, 4: 0.00240, | 1: 0.00245, 2: 0.00203, 3: 0.00180, 4: 0.00214, | AZOBR_p120095 | 5: 0.00006,                                                 |                                     |
| AZOLI_p30340 | 3: 0.00022,                                     | 4: 0.00004,                                     | AZOBR_p120096 | 5: 0.00006,                                                 | 2: 0.00006, 3: 0.00008,             |
| AZOLI_p30344 | 1: 0.00242, 2: 0.00234, 3: 0.00068, 4: 0.00153, | 1: 0.00104, 2: 0.00100, 3: 0.00052, 4: 0.00061, | AZOBR_p120097 | 1: 0.00024, 3: 0.00020, 4: 0.00024, 5: 0.00041,             | 2: 0.00034, 3: 0.00044,             |
| AZOLI_p30350 | 1: 0.00024, 2: 0.00030, 3: 0.00021, 4: 0.00039, | 1: 0.00018, 2: 0.00012, 3: 0.00010, 4: 0.00026, | AZOBR_p120098 |                                                             | 3: 0.00007,                         |
| AZOLI_p30352 |                                                 | 1: 0.00063, 2: 0.00047, 3: 0.00031, 4: 0.00033, | AZOBR_p120099 | 1: 0.00020, 2: 0.00040, 3: 0.00065, 4: 0.00014, 5: 0.00014, | 1: 0.00010, 2: 0.00015, 3: 0.00009, |
| AZOLI_p30353 |                                                 | 1: 0.00016, 2: 0.00023, 3: 0.00025, 4: 0.00075, | AZOBR_p120101 |                                                             |                                     |
| AZOLI_p30354 | 1: 0.00016, 2: 0.00011, 4: 0.00063,             | 1: 0.00021, 2: 0.00066, 3: 0.00084, 4: 0.00045, | AZOBR_p120103 | 1: 0.00011, 2: 0.00010, 4: 0.00008, 5: 0.00023,             | 1: 0.00014, 3: 0.00017,             |
| AZOLI_p30355 |                                                 | 1: 0.00010, 2: 0.00009, 3: 0.00004, 4: 0.00008, | AZOBR_p120104 | 1: 0.00021, 2: 0.00009, 3: 0.00044, 4: 0.00050, 5: 0.00048, | 1: 0.00018, 2: 0.00018, 3: 0.00036, |
| AZOLI_p30356 |                                                 | 1: 0.00007, 2: 0.00010, 3: 0.00005, 4: 0.00005, | AZOBR_p120109 |                                                             |                                     |
| AZOLI_p30357 | 1: 0.00006, 2: 0.00018, 3: 0.00017, 4: 0.00015, | 2: 0.00018, 3: 0.00013, 4: 0.00005,             | AZOBR_p120110 | 1: 0.00010, 2: 0.00009, 3: 0.00008, 4: 0.00016, 5: 0.00009, | 1: 0.00011, 2: 0.00022, 3: 0.00021, |
| AZOLI_p30360 | 1: 0.00005, 2: 0.00005, 4: 0.00005,             | 1: 0.00009, 2: 0.00010, 3: 0.00008, 4: 0.00010, | AZOBR_p120114 |                                                             |                                     |
| AZOLI_p30365 | 4: 0.00003,                                     | 4: 0.00005,                                     | AZOBR_p120116 | 4: 0.00025, 5: 0.00006,                                     |                                     |
| AZOLI_p30370 | 4: 0.00004,                                     |                                                 | AZOBR_p120117 |                                                             | 2: 0.00006, 3: 0.00005,             |
| AZOLI_p30371 | 2: 0.00018,                                     |                                                 | AZOBR_p120120 | 1: 0.00024, 2: 0.00095, 3: 0.00051, 4: 0.00049,             | 1: 0.00030, 2: 0.00026, 3: 0.00030, |
| AZOLI_p30375 | 1: 0.00006,                                     | 1: 0.00006, 2: 0.00006, 3: 0.00006, 4: 0.00007, | AZOBR_p120121 | 1: 0.00022, 3: 0.00014, 4: 0.00034, 5: 0.00012,             |                                     |
| AZOLI_p30376 | 2: 0.00008,                                     | 1: 0.00021, 3: 0.00014, 4: 0.00005,             | AZOBR_p130008 | 1: 0.00014, 2: 0.00015, 3: 0.00027, 4: 0.00017, 5: 0.00007, | 1: 0.00025, 2: 0.00033, 3: 0.00031, |
| AZOLI_p30377 |                                                 | 1: 0.00005, 3: 0.00005, 4: 0.00004,             | AZOBR_p130009 | 3: 0.00009,                                                 |                                     |
| AZOLI_p30381 | 1: 0.00101, 2: 0.00095, 3: 0.00018, 4: 0.00137, | 1: 0.00201, 2: 0.00251, 3: 0.00220, 4: 0.00197, | AZOBR_p130010 | 1: 0.00030, 3: 0.00045, 4: 0.00036, 5: 0.00021,             | 1: 0.00029, 2: 0.00027, 3: 0.00014, |
| AZOLI_p30382 |                                                 | 1: 0.00012, 4: 0.00011,                         | AZOBR_p130011 | 4: 0.00010, 5: 0.00007,                                     |                                     |
| AZOLI_p30398 |                                                 | 1: 0.00010, 2: 0.00006, 3: 0.00009,             | AZOBR_p130015 |                                                             |                                     |
| AZOLI_p30406 | 4: 0.00009,                                     |                                                 | AZOBR_p130016 | 4: 0.00007,                                                 |                                     |
| AZOLI_p30420 |                                                 | 4: 0.00023,                                     | AZOBR_p130017 | 1: 0.00108, 2: 0.00047, 3: 0.00046, 4: 0.00093, 5: 0.00121, | 1: 0.00034, 2: 0.00020, 3: 0.00058, |
| AZOLI_p30424 | 2: 0.00008, 4: 0.00008,                         | 1: 0.00025, 2: 0.00013, 3: 0.00018, 4: 0.00010, | AZOBR_p130019 |                                                             | 1: 0.00004,                         |
| AZOLI_p30430 | 2: 0.00022, 4: 0.00019,                         | 1: 0.00022, 2: 0.00056, 3: 0.00061, 4: 0.00056, | AZOBR_p130022 | 1: 0.00033, 2: 0.00067, 3: 0.00065, 4: 0.00060, 5: 0.00068, | 1: 0.00119, 2: 0.00060, 3: 0.00210, |
| AZOLI_p30433 | 1: 0.00018, 2: 0.00019, 3: 0.00043, 4: 0.00053, | 1: 0.00125, 2: 0.00024, 3: 0.00106, 4: 0.00064, | AZOBR_p130023 | 5: 0.00019,                                                 | 2: 0.00008,                         |
| AZOLI_p30438 |                                                 | 4: 0.00005,                                     | AZOBR_p130024 | 1: 0.00019, 3: 0.00012, 4: 0.00013, 5: 0.00019,             | 1: 0.00009, 2: 0.00010, 3: 0.00014, |
| AZOLI_p30441 | 2: 0.00009,                                     | 2: 0.00009,                                     | AZOBR_p130027 | 1: 0.00063, 2: 0.00025, 3: 0.00044, 4: 0.00047, 5: 0.00043, | 1: 0.00037, 2: 0.00042, 3: 0.00014, |
| AZOLI_p30442 | 1: 0.00012, 2: 0.00030, 4: 0.00021,             | 1: 0.00030, 2: 0.00012, 4: 0.00031,             | AZOBR_p130032 | 1: 0.00018, 3: 0.00008, 4: 0.00006,                         |                                     |
| AZOLI_p30443 | 1: 0.00010, 2: 0.00010, 4: 0.00022,             | 2: 0.00010, 3: 0.00017, 4: 0.00013,             | AZOBR_p130033 | 1: 0.00016, 2: 0.00010, 4: 0.00019,                         | 1: 0.00021, 2: 0.00012, 3: 0.00020, |
| AZOLI_p30450 |                                                 | 1: 0.00007, 3: 0.00009, 4: 0.00006,             | AZOBR_p130034 | 5: 0.00014,                                                 |                                     |
| AZOLI_p30451 |                                                 | 3: 0.00005,                                     | AZOBR_p130041 | 4: 0.00010, 5: 0.00013,                                     | 1: 0.00024, 2: 0.00028, 3: 0.00024, |
| AZOLI_p30455 |                                                 | 2: 0.00004, 4: 0.00007,                         | AZOBR_p130042 | 3: 0.00007,                                                 |                                     |
| AZOLI_p30456 |                                                 | 2: 0.00015, 4: 0.00013,                         | AZOBR_p130044 |                                                             |                                     |
| AZOLI_p30457 | 3: 0.00018, 4: 0.00011,                         | 1: 0.00026, 2: 0.00008, 3: 0.00014,             | AZOBR_p130045 |                                                             | 1: 0.00031, 2: 0.00029, 3: 0.00020, |
| AZOLI_p30459 | 4: 0.00007,                                     | 1: 0.00013, 3: 0.00028, 4: 0.00015,             | AZOBR_p130049 |                                                             |                                     |
| AZOLI_p30461 | 4: 0.00002,                                     | 1: 0.00004, 3: 0.00008, 4: 0.00002,             | AZOBR_p130050 |                                                             |                                     |
| AZOLI_p30466 | 1: 0.00029, 2: 0.00053,                         | 1: 0.00053, 2: 0.00023, 3: 0.00019, 4: 0.00010, | AZOBR_p130052 |                                                             |                                     |
| AZOLI_p30469 |                                                 | 4: 0.00005,                                     | AZOBR_p130057 |                                                             |                                     |
| AZOLI_p30470 | 1: 0.00019, 4: 0.00008,                         |                                                 | AZOBR_p130059 | 3: 0.00010, 5: 0.00008,                                     |                                     |
| AZOLI_p30476 |                                                 | 1: 0.00004, 2: 0.00006,                         | AZOBR_p130067 |                                                             |                                     |
| AZOLI_p30479 | 2: 0.00013, 3: 0.00012, 4: 0.00018,             | 1: 0.00009, 2: 0.00012, 3: 0.00023, 4: 0.00007, | AZOBR_p130068 | 1: 0.00024, 2: 0.00015, 3: 0.00018, 4: 0.00018, 5: 0.00013, | 1: 0.00009, 2: 0.00010, 3: 0.00012, |
| AZOLI_p30480 | 4: 0.00004,                                     | 3: 0.00005, 4: 0.00004,                         | AZOBR_p130071 | 3: 0.00009, 4: 0.00007, 5: 0.00011,                         | 3: 0.00006,                         |
| AZOLI_p30480 | 1: 0.00003, 2: 0.00010, 4: 0.00009,             | 1: 0.00026, 2: 0.00015, 3: 0.00027, 4: 0.00016, | AZOBR_p130072 | 4: 0.00005,                                                 |                                     |
| AZOLI_p30488 | 1: 0.00008, 4: 0.00004,                         | 2: 0.00010, 4: 0.00009,                         | AZOBR_p130073 | 2: 0.00008, 4: 0.00009, 5: 0.00009,                         | 1: 0.00030, 2: 0.00019, 3: 0.00054, |
| AZOLI_p30489 | 4: 0.00005,                                     | 1: 0.00011, 3: 0.00011, 4: 0.00008,             | AZOBR_p130078 | 5: 0.00006,                                                 | 3: 0.00008,                         |
| AZOLI_p30491 | 2: 0.00105, 3: 0.00025,                         | 1: 0.00079, 2: 0.00042,                         | AZOBR_p130082 | 3: 0.00032,                                                 |                                     |

|              |                                                                   |                                                    |               |                                                                |                                                                   |
|--------------|-------------------------------------------------------------------|----------------------------------------------------|---------------|----------------------------------------------------------------|-------------------------------------------------------------------|
|              | 4: 0.00023,                                                       | 3: 0.00047, 4: 0.00045,                            |               |                                                                |                                                                   |
| AZOLI_p30492 |                                                                   | 1: 0.00014,                                        | AZOBR_p130083 |                                                                | 1: 0.00002,                                                       |
| AZOLI_p30493 | 4: 0.00020,                                                       |                                                    | AZOBR_p130098 | 1: 0.00013, 2: 0.00011, 3: 0.00011,<br>4: 0.00042, 5: 0.00012, | 2: 0.00013, 3: 0.00005,<br>1: 0.00036, 2: 0.00047,<br>3: 0.00066, |
| AZOLI_p30495 | 2: 0.00028, 4: 0.00016,                                           | 1: 0.00046, 2: 0.00036,<br>3: 0.00049, 4: 0.00016, | AZOBR_p130103 | 1: 0.00009, 2: 0.00023, 3: 0.00011,<br>4: 0.00021, 5: 0.00012, |                                                                   |
| AZOLI_p30500 | 1: 0.00003, 3: 0.00013,<br>4: 0.00007,                            | 1: 0.00019, 2: 0.00025,<br>3: 0.00030, 4: 0.00027, | AZOBR_p130108 |                                                                | 1: 0.00005, 3: 0.00009,                                           |
| AZOLI_p30501 | 1: 0.00015, 2: 0.00022,<br>3: 0.00033, 4: 0.00023,                | 1: 0.00044, 2: 0.00036,<br>3: 0.00031, 4: 0.00031, | AZOBR_p130110 | 2: 0.00015, 3: 0.00011, 4: 0.00015,<br>5: 0.00015,             | 3: 0.00029,                                                       |
| AZOLI_p30502 | 1: 0.00004, 4: 0.00008,                                           | 1: 0.00004, 2: 0.00009,<br>4: 0.00010,             | AZOBR_p130112 |                                                                |                                                                   |
| AZOLI_p30506 | 4: 0.00016,                                                       | 3: 0.00013, 4: 0.00016,                            | AZOBR_p130113 |                                                                | 3: 0.00007,                                                       |
| AZOLI_p30507 | 4: 0.00008,                                                       | 1: 0.00014, 2: 0.00017,<br>3: 0.00038, 4: 0.00008, | AZOBR_p130114 | 2: 0.00026, 3: 0.00025, 4: 0.00025,<br>5: 0.00030,             | 2: 0.00011, 3: 0.00009,                                           |
| AZOLI_p30509 | 1: 0.00036, 2: 0.00012,<br>3: 0.00093, 4: 0.00036,                | 1: 0.00079, 2: 0.00117,<br>3: 0.00167, 4: 0.00119, | AZOBR_p130115 | 3: 0.00014, 4: 0.00027, 5: 0.00055,                            | 1: 0.00018, 2: 0.00021,<br>3: 0.00032,                            |
| AZOLI_p30517 | 4: 0.00009,                                                       | 4: 0.00022,                                        | AZOBR_p130121 |                                                                |                                                                   |
| AZOLI_p30533 | 1: 0.00007, 2: 0.00007,<br>4: 0.00024,                            | 1: 0.00014, 2: 0.00009,<br>3: 0.00022, 4: 0.00006, | AZOBR_p130122 | 1: 0.00080, 2: 0.00102, 3: 0.00068,<br>4: 0.00116, 5: 0.00147, | 1: 0.00068, 2: 0.00062,<br>3: 0.00070,                            |
| AZOLI_p30534 | 1: 0.00022, 2: 0.00016,<br>4: 0.00019,                            | 1: 0.00023, 2: 0.00018,<br>3: 0.00022, 4: 0.00012, | AZOBR_p130123 | 1: 0.00049, 2: 0.00022, 3: 0.00031,<br>4: 0.00055, 5: 0.00047, | 2: 0.00013, 3: 0.00023,                                           |
| AZOLI_p30537 | 2: 0.00004,                                                       |                                                    | AZOBR_p130127 | 1: 0.00026, 2: 0.00011, 3: 0.00029,<br>4: 0.00018, 5: 0.00015, |                                                                   |
| AZOLI_p30557 | 1: 0.00003,                                                       | 1: 0.00010, 2: 0.00013,<br>3: 0.00006, 4: 0.00013, | AZOBR_p130128 | 1: 0.00027, 2: 0.00047, 3: 0.00031,<br>4: 0.00028, 5: 0.00034, | 1: 0.00043, 2: 0.00049,<br>3: 0.00058,                            |
| AZOLI_p30559 |                                                                   | 1: 0.00004, 3: 0.00008,<br>4: 0.00007,             | AZOBR_p130133 | 4: 0.00003,                                                    |                                                                   |
| AZOLI_p30562 |                                                                   | 3: 0.00040,                                        | AZOBR_p130134 |                                                                |                                                                   |
| AZOLI_p30580 | 4: 0.00006,                                                       |                                                    | AZOBR_p130135 | 1: 0.00713, 2: 0.00303, 3: 0.00966,<br>4: 0.00872, 5: 0.01256, | 1: 0.00321, 2: 0.00327,<br>3: 0.00279,                            |
| AZOLI_p30582 | 1: 0.00055, 2: 0.00048,<br>4: 0.00044,                            | 1: 0.00048, 2: 0.00029,<br>3: 0.00043, 4: 0.00032, | AZOBR_p130136 | 1: 0.00006, 5: 0.00006,                                        |                                                                   |
| AZOLI_p30589 | 1: 0.00011,                                                       | 2: 0.00018, 3: 0.00012,<br>4: 0.00016,             | AZOBR_p130137 | 3: 0.00027, 4: 0.00051, 5: 0.00015,                            | 1: 0.00034, 3: 0.00046,                                           |
| AZOLI_p30595 | 2: 0.00015, 4: 0.00003,                                           | 1: 0.00043, 2: 0.00022,<br>3: 0.00038, 4: 0.00016, | AZOBR_p130140 | 1: 0.00051, 2: 0.00036, 3: 0.00039,<br>4: 0.00021, 5: 0.00025, | 1: 0.00016, 2: 0.00018,<br>3: 0.00016,                            |
| AZOLI_p30596 | 1: 0.00007, 2: 0.00007,<br>1: 0.00037, 2: 0.00028,<br>4: 0.00016, | 4: 0.00004,                                        | AZOBR_p130141 | 4: 0.00007,                                                    | 1: 0.00025, 2: 0.00014,<br>3: 0.00025,                            |
| AZOLI_p40001 |                                                                   |                                                    | AZOBR_p130142 | 1: 0.00101, 2: 0.00107, 3: 0.00120,                            | 2: 0.00029,                                                       |
| AZOLI_p40005 |                                                                   | 2: 0.00004,                                        | AZOBR_p130143 | 1: 0.00024, 2: 0.00008, 3: 0.00016,<br>4: 0.00018, 5: 0.00025, | 1: 0.00015, 2: 0.00023,<br>3: 0.00025,                            |
| AZOLI_p40009 | 4: 0.00008,                                                       |                                                    | AZOBR_p130144 | 1: 0.00007, 2: 0.00013, 3: 0.00019,<br>4: 0.00018, 5: 0.00015, | 2: 0.00005,                                                       |
| AZOLI_p40012 | 3: 0.00023,                                                       | 1: 0.00151, 2: 0.00130,<br>3: 0.00139, 4: 0.00182, | AZOBR_p130147 |                                                                | 2: 0.00011, 3: 0.00009,                                           |
| AZOLI_p40023 | 2: 0.00006, 4: 0.00022,                                           | 1: 0.00023, 2: 0.00006,<br>3: 0.00037, 4: 0.00017, | AZOBR_p130148 |                                                                | 1: 0.00003, 2: 0.00003,<br>3: 0.00010,                            |
| AZOLI_p40027 | 4: 0.00007,                                                       |                                                    | AZOBR_p130149 | 4: 0.00035,                                                    |                                                                   |
| AZOLI_p40031 |                                                                   | 4: 0.00011,                                        | AZOBR_p130150 | 4: 0.00004,                                                    |                                                                   |
| AZOLI_p40032 | 3: 0.00009,                                                       | 1: 0.00003, 2: 0.00003,<br>3: 0.00003,             | AZOBR_p130154 | 1: 0.00017, 2: 0.00030, 3: 0.00038,<br>4: 0.00035, 5: 0.00019, | 1: 0.00018, 2: 0.00045,<br>3: 0.00007,                            |
| AZOLI_p40037 | 4: 0.00006,                                                       | 1: 0.00020, 2: 0.00016,<br>3: 0.00039, 4: 0.00043, | AZOBR_p130155 | 1: 0.00018, 2: 0.00027, 3: 0.00016,<br>4: 0.00008, 5: 0.00008, |                                                                   |
| AZOLI_p40044 | 3: 0.00007, 4: 0.00006,                                           | 3: 0.00004, 4: 0.00006,                            | AZOBR_p130158 | 2: 0.00016, 3: 0.00013, 4: 0.00017,<br>5: 0.00015,             | 1: 0.00049, 2: 0.00049,<br>3: 0.00060,                            |
| AZOLI_p40045 | 4: 0.00011,                                                       | 2: 0.00008,                                        | AZOBR_p130159 | 4: 0.00009, 5: 0.00009,                                        | 1: 0.00008, 2: 0.00009,<br>3: 0.00008,                            |
| AZOLI_p40046 | 1: 0.00017, 4: 0.00019,                                           | 1: 0.00008, 2: 0.00022,<br>4: 0.00005,             | AZOBR_p130162 |                                                                | 1: 0.00035,                                                       |
| AZOLI_p40053 |                                                                   | 3: 0.00014,                                        | AZOBR_p130163 | 1: 0.01120, 2: 0.00568, 3: 0.00971,<br>4: 0.00707, 5: 0.00815, | 1: 0.00485, 2: 0.00544,<br>3: 0.00296,                            |
| AZOLI_p40055 | 2: 0.00015, 4: 0.00030,                                           | 2: 0.00011, 3: 0.00012,<br>4: 0.00020,             | AZOBR_p130164 |                                                                | 3: 0.00006,                                                       |
| AZOLI_p40058 | 1: 0.00218, 2: 0.00100,<br>4: 0.00180,                            |                                                    | AZOBR_p130169 | 1: 0.00015, 2: 0.00013, 3: 0.00026,<br>4: 0.00024, 5: 0.00007, | 3: 0.00016,                                                       |
| AZOLI_p40060 | 1: 0.00030, 2: 0.00013,<br>4: 0.00017,                            |                                                    | AZOBR_p130170 | 1: 0.00054, 2: 0.00048, 3: 0.00052,<br>4: 0.00037, 5: 0.00037, | 1: 0.00043, 2: 0.00025,<br>3: 0.00055,                            |
| AZOLI_p40061 | 1: 0.00110, 2: 0.00048,<br>4: 0.00041,                            |                                                    | AZOBR_p130173 | 5: 0.00007,                                                    | 2: 0.00019, 3: 0.00010,                                           |
| AZOLI_p40062 | 1: 0.00143, 2: 0.00092,<br>4: 0.00191,                            |                                                    | AZOBR_p130179 | 3: 0.00007, 4: 0.00009, 5: 0.00009,                            | 1: 0.00005, 3: 0.00005,                                           |
| AZOLI_p40065 | 1: 0.00016, 2: 0.00010,<br>4: 0.00030,                            |                                                    | AZOBR_p130180 | 1: 0.00027, 2: 0.00043, 3: 0.00064,<br>4: 0.00039, 5: 0.00052, | 1: 0.00062, 2: 0.00062,<br>3: 0.00077,                            |
| AZOLI_p40066 | 1: 0.00010, 2: 0.00007,<br>4: 0.00004,                            | 2: 0.00012,                                        | AZOBR_p130182 | 1: 0.00087, 2: 0.00090, 3: 0.00087,<br>4: 0.00076, 5: 0.00086, | 1: 0.00050, 2: 0.00057,<br>3: 0.00058,                            |
| AZOLI_p40067 | 1: 0.00006,                                                       |                                                    | AZOBR_p130183 | 4: 0.00013,                                                    | 2: 0.00014, 3: 0.00012,                                           |
| AZOLI_p40070 | 4: 0.00020,                                                       |                                                    | AZOBR_p130186 | 1: 0.00027, 2: 0.00014, 3: 0.00010,<br>4: 0.00005, 5: 0.00005, | 1: 0.00025, 2: 0.00063,<br>3: 0.00029,                            |
| AZOLI_p40073 | 1: 0.00014, 2: 0.00016,<br>4: 0.00008,                            | 1: 0.00087, 2: 0.00082,<br>3: 0.00097, 4: 0.00112, | AZOBR_p130191 |                                                                |                                                                   |
| AZOLI_p40074 |                                                                   | 1: 0.00015, 2: 0.00006,<br>3: 0.00013, 4: 0.00028, | AZOBR_p130192 | 2: 0.00022, 3: 0.00021, 4: 0.00024,<br>5: 0.00014,             | 2: 0.00015, 3: 0.00012,                                           |
| AZOLI_p40075 |                                                                   | 1: 0.00081, 2: 0.00093,<br>3: 0.00086, 4: 0.00073, | AZOBR_p130195 | 3: 0.00091, 4: 0.00191, 5: 0.00088,                            | 1: 0.00027, 3: 0.00119,                                           |
| AZOLI_p40078 | 3: 0.00033,                                                       |                                                    | AZOBR_p130197 |                                                                | 1: 0.00008,                                                       |
| AZOLI_p40079 | 1: 0.00013, 4: 0.00016,                                           | 2: 0.00012,                                        | AZOBR_p130206 |                                                                |                                                                   |
| AZOLI_p40100 |                                                                   | 1: 0.00009,                                        | AZOBR_p130208 |                                                                |                                                                   |
| AZOLI_p40104 |                                                                   | 1: 0.00083, 2: 0.00084,                            | AZOBR_p130209 | 1: 0.00009,                                                    | 1: 0.00025, 2: 0.00019,                                           |

|              |                                                    |                                                                   |               |                                                                |                                        |
|--------------|----------------------------------------------------|-------------------------------------------------------------------|---------------|----------------------------------------------------------------|----------------------------------------|
|              |                                                    | 3: 0.00097, 4: 0.00096,                                           |               |                                                                | 3: 0.00029,                            |
| AZOLI_p40106 | 1: 0.00027, 2: 0.00038,<br>3: 0.00027, 4: 0.00029, | 1: 0.00041, 2: 0.00047,<br>3: 0.00045, 4: 0.00040,                | AZOBR_p130211 | 1: 0.00111, 2: 0.00066, 3: 0.00041,<br>4: 0.00064, 5: 0.00073, | 1: 0.00167, 2: 0.00164,<br>3: 0.00171, |
| AZOLI_p40112 | 2: 0.00011,                                        |                                                                   | AZOBR_p130213 | 4: 0.00008,                                                    |                                        |
| AZOLI_p40116 |                                                    | 4: 0.00004,                                                       | AZOBR_p140003 | 1: 0.00088, 2: 0.00052, 3: 0.00054,<br>4: 0.00078, 5: 0.00072, | 1: 0.00099, 2: 0.00070,<br>3: 0.00091, |
| AZOLI_p40117 | 4: 0.00023,                                        |                                                                   | AZOBR_p140006 | 1: 0.00077, 2: 0.00048, 3: 0.00072,<br>4: 0.00040, 5: 0.00019, |                                        |
| AZOLI_p40121 | 1: 0.00053, 2: 0.00085,<br>4: 0.00122,             | 1: 0.00072, 2: 0.00069,<br>3: 0.00062, 4: 0.00050,                | AZOBR_p140008 | 4: 0.00011,                                                    | 3: 0.00005,                            |
| AZOLI_p40123 | 4: 0.00003,                                        |                                                                   | AZOBR_p140015 |                                                                |                                        |
| AZOLI_p40124 | 2: 0.00009,                                        |                                                                   | AZOBR_p140019 | 3: 0.00015,                                                    |                                        |
| AZOLI_p40128 | 4: 0.00160,                                        |                                                                   | AZOBR_p140022 | 1: 0.00075, 2: 0.00061, 3: 0.00074,<br>4: 0.00064, 5: 0.00034, | 2: 0.00023, 3: 0.00035,                |
| AZOLI_p40132 | 2: 0.00031, 3: 0.00044,                            | 1: 0.00084, 2: 0.00071,<br>3: 0.00055, 4: 0.00040,                | AZOBR_p140023 |                                                                | 3: 0.00007,                            |
| AZOLI_p40133 | 3: 0.00052,                                        | 1: 0.00075, 2: 0.00026,<br>3: 0.00056, 4: 0.00018,                | AZOBR_p140024 | 3: 0.00006,                                                    | 2: 0.00003, 3: 0.00003,                |
| AZOLI_p40135 |                                                    | 2: 0.00081, 4: 0.00051,                                           | AZOBR_p140027 | 1: 0.00094, 2: 0.00083, 3: 0.00099,<br>4: 0.00052, 5: 0.00048, | 1: 0.00265, 2: 0.00243,<br>3: 0.00221, |
| AZOLI_p40147 | 1: 0.00078, 2: 0.00086,<br>3: 0.00087, 4: 0.00094, | 1: 0.00042, 2: 0.00034,<br>3: 0.00045, 4: 0.00044,                | AZOBR_p140029 |                                                                |                                        |
| AZOLI_p40163 | 1: 0.00188, 2: 0.00225,<br>3: 0.00430, 4: 0.00172, | 1: 0.00254, 2: 0.00264,<br>3: 0.00218, 4: 0.00247,                | AZOBR_p140030 | 1: 0.00020, 2: 0.00058, 3: 0.00063,<br>4: 0.00008, 5: 0.00008, | 1: 0.00005, 2: 0.00009,<br>3: 0.00028, |
| AZOLI_p40164 | 1: 0.00010, 2: 0.00023,<br>3: 0.00018, 4: 0.00022, | 1: 0.00047, 2: 0.00030,<br>3: 0.00047, 4: 0.00024,                | AZOBR_p140033 | 1: 0.00041, 2: 0.00018, 3: 0.00029,<br>4: 0.00023, 5: 0.00014, | 1: 0.00009, 2: 0.00040,<br>3: 0.00021, |
| AZOLI_p40165 | 1: 0.00090, 2: 0.00071,<br>3: 0.00137, 4: 0.00080, | 1: 0.00089, 2: 0.00119,<br>3: 0.00107, 4: 0.00124,                | AZOBR_p140035 | 1: 0.00025, 2: 0.00022, 4: 0.00017,                            |                                        |
| AZOLI_p40178 | 4: 0.00004,                                        |                                                                   | AZOBR_p140036 | 4: 0.00015, 5: 0.00008,                                        |                                        |
| AZOLI_p40179 | 4: 0.00009,                                        | 1: 0.00007, 3: 0.00011,                                           | AZOBR_p140038 | 1: 0.00011,                                                    |                                        |
| AZOLI_p40187 | 1: 0.00043, 2: 0.00035,<br>3: 0.00037, 4: 0.00017, | 1: 0.00047, 2: 0.00023,<br>3: 0.00025, 4: 0.00015,                | AZOBR_p140041 |                                                                | 3: 0.00005,                            |
| AZOLI_p40188 |                                                    | 2: 0.00004, 4: 0.00005,                                           | AZOBR_p140042 | 1: 0.00011, 3: 0.00009, 4: 0.00011,                            | 2: 0.00020, 3: 0.00007,                |
| AZOLI_p40196 | 1: 0.00027, 2: 0.00009,<br>3: 0.00043, 4: 0.00016, | 1: 0.00138, 2: 0.00154,<br>3: 0.00140, 4: 0.00126,                | AZOBR_p140043 |                                                                |                                        |
| AZOLI_p40206 | 2: 0.00042, 4: 0.00059,                            | 1: 0.00070, 2: 0.00054,<br>3: 0.00089, 4: 0.00036,                | AZOBR_p140045 |                                                                | 1: 0.00008,                            |
| AZOLI_p40213 |                                                    | 1: 0.00021, 2: 0.00021,<br>3: 0.00023, 4: 0.00014,                | AZOBR_p140049 |                                                                | 1: 0.00009, 2: 0.00012,<br>3: 0.00014, |
| AZOLI_p40215 | 4: 0.00017,                                        |                                                                   | AZOBR_p140055 | 1: 0.00009, 3: 0.00004, 4: 0.00006,<br>5: 0.00003,             | 1: 0.00002, 2: 0.00005,<br>3: 0.00009, |
| AZOLI_p40216 | 2: 0.00005,                                        |                                                                   | AZOBR_p140056 |                                                                |                                        |
| AZOLI_p40218 | 1: 0.00007, 2: 0.00009,<br>3: 0.00013, 4: 0.00024, | 1: 0.00010, 2: 0.00018,<br>3: 0.00023, 4: 0.00016,                | AZOBR_p140058 | 1: 0.00074, 2: 0.00065, 3: 0.00039,<br>4: 0.00089, 5: 0.00045, | 1: 0.00095, 2: 0.00054,<br>3: 0.00121, |
| AZOLI_p40221 |                                                    | 4: 0.00010,                                                       | AZOBR_p140060 |                                                                | 3: 0.00003,                            |
| AZOLI_p40224 | 4: 0.00014,                                        |                                                                   | AZOBR_p140066 | 2: 0.00011, 3: 0.00012, 4: 0.00012,<br>5: 0.00017,             | 1: 0.00012, 2: 0.00007,<br>3: 0.00015, |
| AZOLI_p40233 | 1: 0.00010, 4: 0.00026,                            | 1: 0.00048, 2: 0.00040,<br>3: 0.00047, 4: 0.00038,                | AZOBR_p140067 | 1: 0.00058, 2: 0.00036, 3: 0.00052,<br>4: 0.00078, 5: 0.00052, | 1: 0.00081, 2: 0.00075,<br>3: 0.00121, |
| AZOLI_p40238 | 1: 0.00013, 2: 0.00017,<br>3: 0.00012,             | 1: 0.00038, 2: 0.00033,<br>3: 0.00022, 4: 0.00029,                | AZOBR_p140071 |                                                                | 1: 0.00474, 2: 0.00483,<br>3: 0.00376, |
| AZOLI_p40243 | 4: 0.00012,                                        | 1: 0.00014, 2: 0.00032,<br>3: 0.00020, 4: 0.00008,                | AZOBR_p140074 | 1: 0.00010, 3: 0.00016, 4: 0.00013,<br>5: 0.00007,             |                                        |
| AZOLI_p40247 |                                                    | 4: 0.00004,                                                       | AZOBR_p140080 | 1: 0.00031, 3: 0.00020, 4: 0.00011,                            | 1: 0.00020, 2: 0.00022,<br>3: 0.00024, |
| AZOLI_p40249 | 1: 0.00026, 2: 0.00013,<br>3: 0.00226, 4: 0.00022, | 1: 0.00016, 2: 0.00025,<br>3: 0.00041, 4: 0.00014,                | AZOBR_p140081 | 1: 0.00128, 2: 0.00247, 3: 0.00199,<br>4: 0.00213, 5: 0.00205, | 1: 0.00202, 2: 0.00187,<br>3: 0.00167, |
| AZOLI_p40257 |                                                    | 3: 0.00006, 4: 0.00007,                                           | AZOBR_p140082 | 1: 0.00395, 2: 0.00308, 3: 0.00309,<br>4: 0.00224, 5: 0.00196, | 1: 0.00212, 2: 0.00278,<br>3: 0.00200, |
| AZOLI_p40258 |                                                    | 3: 0.00015, 4: 0.00010,<br>2: 0.00013, 3: 0.00009,<br>4: 0.00007, | AZOBR_p140083 | 1: 0.00050, 2: 0.00009, 3: 0.00038,<br>4: 0.00038, 5: 0.00045, | 1: 0.00035, 2: 0.00022,<br>3: 0.00049, |
| AZOLI_p40261 |                                                    | 3: 0.00004, 4: 0.00003,                                           | AZOBR_p140086 | 2: 0.00013, 3: 0.00013, 4: 0.00017,<br>5: 0.00013,             | 1: 0.00019, 2: 0.00018,<br>3: 0.00021, |
| AZOLI_p40262 |                                                    | 4: 0.00024,                                                       | AZOBR_p140088 |                                                                |                                        |
| AZOLI_p40272 |                                                    |                                                                   | AZOBR_p140091 |                                                                |                                        |
| AZOLI_p40276 | 1: 0.00008, 2: 0.00010,<br>4: 0.00013,             | 1: 0.00013, 2: 0.00008,<br>3: 0.00008, 4: 0.00013,                | AZOBR_p140093 |                                                                |                                        |
| AZOLI_p40279 |                                                    | 2: 0.00035, 3: 0.00015,<br>4: 0.00025,                            | AZOBR_p140097 |                                                                | 1: 0.00026, 2: 0.00037,<br>3: 0.00025, |
| AZOLI_p40284 | 4: 0.00039,                                        |                                                                   | AZOBR_p140100 |                                                                |                                        |
| AZOLI_p40289 | 1: 0.00037, 2: 0.00068,<br>3: 0.00078, 4: 0.00053, | 1: 0.00044, 2: 0.00060,<br>3: 0.00026, 4: 0.00048,                | AZOBR_p150007 |                                                                |                                        |
| AZOLI_p40290 | 1: 0.00069, 2: 0.00037,<br>3: 0.00029, 4: 0.00056, | 1: 0.00157, 2: 0.00195,<br>3: 0.00241, 4: 0.00208,                | AZOBR_p150011 | 1: 0.00007, 2: 0.00006, 3: 0.00015,<br>4: 0.00012,             | 1: 0.00004,                            |
| AZOLI_p40291 |                                                    | 3: 0.00009, 4: 0.00004,                                           | AZOBR_p150013 | 1: 0.00045, 2: 0.00035, 3: 0.00024,<br>4: 0.00051, 5: 0.00066, | 1: 0.00138, 2: 0.00116,<br>3: 0.00155, |
| AZOLI_p40293 |                                                    | 1: 0.00020, 2: 0.00036,<br>3: 0.00036, 4: 0.00038,                | AZOBR_p150015 |                                                                |                                        |
| AZOLI_p40302 |                                                    | 4: 0.00005,                                                       | AZOBR_p150017 | 1: 0.00066, 2: 0.00055, 3: 0.00062,<br>4: 0.00056, 5: 0.00035, | 1: 0.00043, 2: 0.00054,<br>3: 0.00062, |
| AZOLI_p40309 |                                                    | 2: 0.00007, 4: 0.00004,                                           | AZOBR_p150027 | 5: 0.00018,                                                    | 1: 0.00017, 2: 0.00026,<br>3: 0.00060, |
| AZOLI_p40317 |                                                    | 2: 0.00009, 4: 0.00015,                                           | AZOBR_p150029 | 4: 0.00023,                                                    | 3: 0.00008,                            |
| AZOLI_p40319 | 1: 0.00008, 4: 0.00010,                            |                                                                   | AZOBR_p150033 | 4: 0.00020,                                                    | 3: 0.00027,                            |
| AZOLI_p40321 | 4: 0.00011,                                        |                                                                   | AZOBR_p150039 | 2: 0.00020, 3: 0.00019, 4: 0.00047,                            | 1: 0.00044, 2: 0.00041,<br>3: 0.00021, |
| AZOLI_p40326 | 1: 0.00168, 2: 0.00266,<br>3: 0.00166, 4: 0.00256, | 1: 0.00148, 2: 0.00082,<br>3: 0.00048, 4: 0.00092,                | AZOBR_p150042 | 2: 0.00020,                                                    | 1: 0.00050, 2: 0.00032,<br>3: 0.00083, |
| AZOLI_p40327 | 1: 0.00110, 2: 0.00111,<br>3: 0.00164, 4: 0.00083, | 1: 0.00153, 2: 0.00127,<br>3: 0.00162, 4: 0.00101,                | AZOBR_p150055 |                                                                | 3: 0.00024,                            |

|              |                                                                                              |                                                    |                |                                                                |                                        |
|--------------|----------------------------------------------------------------------------------------------|----------------------------------------------------|----------------|----------------------------------------------------------------|----------------------------------------|
| AZOLI_p40328 | 1: 0.00016, 4: 0.00009,                                                                      |                                                    | AZOBR_p150061  | 1: 0.00005, 4: 0.00005,                                        | 1: 0.00021, 2: 0.00009,<br>3: 0.00008, |
| AZOLI_p40330 | 1: 0.00036,                                                                                  |                                                    | AZOBR_p150064  |                                                                |                                        |
| AZOLI_p40331 | 1: 0.00019, 2: 0.00027,<br>3: 0.00016, 4: 0.00013,                                           | 1: 0.00031, 2: 0.00018,<br>3: 0.00036, 4: 0.00007, | AZOBR_p150071  |                                                                | 3: 0.00016,                            |
| AZOLI_p40335 | 1: 0.00010, 2: 0.00011,<br>4: 0.00027,                                                       | 1: 0.00032, 2: 0.00024,<br>3: 0.00015, 4: 0.00018, | AZOBR_p150077  | 2: 0.00009, 4: 0.00013, 5: 0.00009,                            | 1: 0.00008, 3: 0.00026,                |
| AZOLI_p40337 |                                                                                              | 2: 0.00005, 3: 0.00005,<br>4: 0.00006,             | AZOBR_p150080  |                                                                |                                        |
| AZOLI_p40339 |                                                                                              | 2: 0.00006, 4: 0.00008,                            | AZOBR_p150083  | 1: 0.00018, 3: 0.00015, 4: 0.00025,<br>5: 0.00031,             | 2: 0.00019, 3: 0.00039,                |
| AZOLI_p40341 | 1: 0.00016, 2: 0.00007,<br>4: 0.00022,                                                       | 1: 0.00056, 2: 0.00067,<br>3: 0.00094, 4: 0.00087, | AZOBR_p150084  | 1: 0.00008,                                                    | 2: 0.00009, 3: 0.00008,                |
| AZOLI_p40342 |                                                                                              | 3: 0.00006,                                        | AZOBR_p150096  |                                                                |                                        |
| AZOLI_p40349 |                                                                                              | 4: 0.00013,                                        | AZOBR_p170010  |                                                                | 1: 0.00004,                            |
| AZOLI_p40365 | 2: 0.00004, 4: 0.00003,                                                                      | 1: 0.00003, 2: 0.00004,                            | AZOBR_p170022  |                                                                |                                        |
| AZOLI_p40366 |                                                                                              | 1: 0.00020, 2: 0.00024,<br>3: 0.00039, 4: 0.00021, | AZOBR_p170033  |                                                                |                                        |
| AZOLI_p40369 |                                                                                              | 3: 0.00005,                                        | AZOBR_p170037  | 1: 0.00024, 2: 0.00015, 3: 0.00029,<br>4: 0.00009, 5: 0.00019, | 1: 0.00007, 2: 0.00012,<br>3: 0.00023, |
| AZOLI_p40376 | 2: 0.00017, 3: 0.00032,                                                                      | 1: 0.00023, 2: 0.00056,<br>4: 0.00054,             | AZOBR_p170038  | 4: 0.00010, 5: 0.00007,                                        |                                        |
| AZOLI_p40386 | 2: 0.00010,                                                                                  |                                                    | AZOBR_p170039  | 2: 0.00010, 3: 0.00010, 4: 0.00019,<br>5: 0.00008,             | 1: 0.00017, 2: 0.00014,<br>3: 0.00029, |
| AZOLI_p40392 |                                                                                              | 3: 0.00007,                                        | AZOBR_p170040  | 2: 0.00006, 3: 0.00006, 4: 0.00005,                            |                                        |
| AZOLI_p40401 |                                                                                              | 1: 0.00014, 4: 0.00024,                            | AZOBR_p170041  | 1: 0.00011, 2: 0.00012, 3: 0.00006,<br>4: 0.00021, 5: 0.00028, | 1: 0.00016, 2: 0.00014,<br>3: 0.00021, |
| AZOLI_p40420 | 4: 0.00002,                                                                                  |                                                    | AZOBR_p170055  |                                                                |                                        |
| AZOLI_p40428 | 1: 0.00043, 2: 0.00113,<br>3: 0.00109, 4: 0.00149,                                           | 1: 0.00140, 2: 0.00093,<br>3: 0.00120, 4: 0.00090, | AZOBR_p170093  | 4: 0.00003,                                                    | 1: 0.00002, 3: 0.00004,                |
| AZOLI_p40429 | 1: 0.00007, 2: 0.00008,<br>3: 0.00013, 4: 0.00018,                                           | 1: 0.00025, 2: 0.00027,<br>3: 0.00030, 4: 0.00032, | AZOBR_p170094  | 1: 0.00016, 2: 0.00014, 3: 0.00009,<br>4: 0.00044, 5: 0.00040, | 1: 0.00020, 3: 0.00026,                |
| AZOLI_p40433 |                                                                                              | 4: 0.00002,                                        | AZOBR_p170096  | 1: 0.00045, 2: 0.00023, 3: 0.00034,<br>4: 0.00040, 5: 0.00066, | 1: 0.00051, 2: 0.00025,<br>3: 0.00038, |
| AZOLI_p40436 | 1: 0.00055, 2: 0.00088,<br>4: 0.00059,                                                       | 1: 0.00051, 2: 0.00058,<br>3: 0.00025, 4: 0.00040, | AZOBR_p170117  |                                                                |                                        |
| AZOLI_p40437 | 1: 0.01442, 2: 0.01192,<br>3: 0.00115, 4: 0.01414,                                           | 1: 0.00166, 2: 0.00192,<br>3: 0.00088, 4: 0.00113, | AZOBR_p170119  | 1: 0.00027, 4: 0.00008, 5: 0.00011,                            | 1: 0.00007, 3: 0.00012,                |
| AZOLI_p40439 | 1: 0.00168, 2: 0.00262,<br>4: 0.00356,                                                       | 1: 0.00031, 2: 0.00075,<br>3: 0.00033,             | AZOBR_p170140  | 4: 0.00013, 5: 0.00009,                                        |                                        |
| AZOLI_p40440 | 4: 0.00010,                                                                                  | 2: 0.00008, 3: 0.00013,                            | AZOBR_p170141  |                                                                | 2: 0.00008,                            |
| AZOLI_p40441 | 1: 0.00034, 2: 0.00019,<br>3: 0.00009, 4: 0.00005,<br>4: 0.00056, 2: 0.00057,<br>4: 0.00073, | 1: 0.00016, 2: 0.00018,<br>3: 0.00010, 4: 0.00008, | AZOBR_p170142  | 1: 0.00022, 2: 0.00046, 3: 0.00045,<br>4: 0.00048, 5: 0.00027, | 1: 0.00034, 2: 0.00048,<br>3: 0.00024, |
| AZOLI_p40442 |                                                                                              |                                                    | AZOBR_p170145  | 4: 0.00009,                                                    |                                        |
| AZOLI_p40443 | 1: 0.00020, 3: 0.00125,                                                                      | 2: 0.00040, 3: 0.00037,<br>4: 0.00035,             | AZOBR_p170146  | 4: 0.00004,                                                    | 1: 0.00015, 3: 0.00003,                |
| AZOLI_p40444 | 1: 0.00039, 2: 0.00059,<br>3: 0.00070, 4: 0.00028,                                           | 1: 0.00059, 2: 0.00053,<br>3: 0.00059, 4: 0.00059, | AZOBR_p170147  |                                                                | 3: 0.00004,                            |
| AZOLI_p40445 | 2: 0.00040, 3: 0.00112,<br>4: 0.00120,                                                       | 1: 0.00040, 2: 0.00058,<br>4: 0.00051,             | AZOBR_p170152  | 2: 0.00010, 3: 0.00010, 4: 0.00008,<br>5: 0.00012,             |                                        |
| AZOLI_p40446 | 4: 0.00013,                                                                                  |                                                    | AZOBR_p170153  |                                                                |                                        |
| AZOLI_p40453 |                                                                                              | 1: 0.00062, 2: 0.00034,<br>3: 0.00075, 4: 0.00053, | AZOBR_p170156  |                                                                | 1: 0.00138, 2: 0.00117,<br>3: 0.00103, |
| AZOLI_p40460 | 2: 0.00105, 3: 0.00146,<br>4: 0.00034,                                                       | 2: 0.00031,                                        | AZOBR_p180001  |                                                                | 2: 0.00047, 3: 0.00027,                |
| AZOLI_p40461 | 1: 0.00015,                                                                                  |                                                    | AZOBR_p180006  | 1: 0.00035, 2: 0.00010, 3: 0.00040,<br>4: 0.00085, 5: 0.00033, | 2: 0.00013, 3: 0.00007,                |
| AZOLI_p40463 | 1: 0.00033, 2: 0.00044,<br>3: 0.00015, 4: 0.00036,                                           | 1: 0.00051, 2: 0.00045,<br>3: 0.00043, 4: 0.00042, | AZOBR_p180009  |                                                                |                                        |
| AZOLI_p40464 | 1: 0.00014, 2: 0.00029,<br>3: 0.00035, 4: 0.00025,                                           | 1: 0.00007, 2: 0.00017,<br>3: 0.00042, 4: 0.00028, | AZOBR_p180016  |                                                                | 3: 0.00006,                            |
| AZOLI_p40465 | 1: 0.00067, 2: 0.00083,<br>3: 0.00067, 4: 0.00101,                                           | 1: 0.00035, 2: 0.00043,<br>3: 0.00048, 4: 0.00052, | AZOBR_p190002  | 1: 0.00015,                                                    |                                        |
| AZOLI_p40466 | 1: 0.00018, 2: 0.00015,<br>3: 0.00017, 4: 0.00028,                                           | 1: 0.00015, 2: 0.00029,<br>3: 0.00019, 4: 0.00020, | AZOBR_p1100001 |                                                                | 3: 0.00002,                            |
| AZOLI_p40467 |                                                                                              | 1: 0.00006, 4: 0.00005,                            | AZOBR_p1100002 | 1: 0.00526, 2: 0.00720, 3: 0.00578,<br>4: 0.00362, 5: 0.00498, |                                        |
| AZOLI_p40471 | 1: 0.00031, 2: 0.00085,<br>3: 0.00177, 4: 0.00063,                                           | 1: 0.00159, 2: 0.00051,<br>3: 0.00157, 4: 0.00054, | AZOBR_p1100009 | 4: 0.00028, 5: 0.00028,                                        |                                        |
| AZOLI_p40472 |                                                                                              | 1: 0.00011, 4: 0.00014,                            | AZOBR_p1100012 |                                                                | 2: 0.00015, 3: 0.00013,                |
| AZOLI_p40473 | 2: 0.00009, 4: 0.00008,                                                                      | 1: 0.00032, 2: 0.00044,<br>3: 0.00019, 4: 0.00016, | AZOBR_p1100018 | 1: 0.00018, 3: 0.00038, 4: 0.00049,<br>5: 0.00037,             | 1: 0.00017, 2: 0.00039,<br>3: 0.00050, |
| AZOLI_p40476 |                                                                                              | 1: 0.00023, 3: 0.00016,<br>4: 0.00013,             | AZOBR_p1100019 | 2: 0.00008,                                                    | 1: 0.00009, 2: 0.00007,                |
| AZOLI_p40482 | 1: 0.00005, 2: 0.00006,<br>4: 0.00005,                                                       | 1: 0.00003, 2: 0.00002,                            | AZOBR_p1100020 | 1: 0.00027, 2: 0.00024, 3: 0.00015,<br>4: 0.00028, 5: 0.00006, | 1: 0.00009, 2: 0.00026,<br>3: 0.00022, |
| AZOLI_p40483 | 2: 0.00006,                                                                                  | 1: 0.00014, 3: 0.00012,<br>4: 0.00015,             | AZOBR_p1100022 |                                                                |                                        |
| AZOLI_p40488 | 1: 0.00037, 2: 0.00017,<br>4: 0.00023,                                                       | 1: 0.00132, 2: 0.00180,<br>3: 0.00172, 4: 0.00173, | AZOBR_p1100026 | 4: 0.00012,                                                    |                                        |
| AZOLI_p40490 | 1: 0.00009, 4: 0.00012,<br>4: 0.00046, 2: 0.00039,<br>4: 0.00059,                            |                                                    | AZOBR_p1100032 |                                                                | 2: 0.00011,                            |
| AZOLI_p40491 | 4: 0.00011,                                                                                  |                                                    | AZOBR_p1100034 |                                                                | 3: 0.00013,                            |
| AZOLI_p40492 |                                                                                              |                                                    | AZOBR_p1100035 | 4: 0.00003,                                                    |                                        |
| AZOLI_p40499 |                                                                                              | 3: 0.00031, 4: 0.00018,                            | AZOBR_p1100045 |                                                                |                                        |
| AZOLI_p40500 | 1: 0.00022, 2: 0.00027,<br>4: 0.00023,                                                       |                                                    | AZOBR_p1100049 | 4: 0.00032,                                                    | 1: 0.00030,                            |
| AZOLI_p40501 | 1: 0.00013, 2: 0.00016,<br>4: 0.00019,                                                       | 4: 0.00004,                                        | AZOBR_p1100059 |                                                                |                                        |

|              |                                                    |                                                    |                |                                                                |                                        |
|--------------|----------------------------------------------------|----------------------------------------------------|----------------|----------------------------------------------------------------|----------------------------------------|
| AZOLI_p40505 | 4: 0.00011,                                        |                                                    | AZOBR_p1100060 | 4: 0.00003, 5: 0.00002,                                        | 3: 0.00003,                            |
| AZOLI_p40506 |                                                    | 1: 0.00018, 2: 0.00008,<br>3: 0.00008, 4: 0.00007, | AZOBR_p1100061 |                                                                | 2: 0.00005,                            |
| AZOLI_p40508 | 1: 0.00019, 2: 0.00005,<br>4: 0.00005,             | 2: 0.00010, 4: 0.00009,                            | AZOBR_p1100065 | 1: 0.00026, 3: 0.00015, 4: 0.00012,<br>5: 0.00012,             |                                        |
| AZOLI_p40512 | 4: 0.00003,                                        |                                                    | AZOBR_p1100066 | 1: 0.00010, 2: 0.00026, 3: 0.00038,<br>4: 0.00051, 5: 0.00034, | 1: 0.00013, 2: 0.00022,<br>3: 0.00022, |
| AZOLI_p40518 | 1: 0.00005, 3: 0.00005,<br>4: 0.00007,             |                                                    | AZOBR_p1100074 |                                                                |                                        |
| AZOLI_p40520 | 4: 0.00025,                                        |                                                    | AZOBR_p1100079 | 3: 0.00009, 4: 0.00011,                                        | 2: 0.00012,                            |
| AZOLI_p40521 |                                                    | 4: 0.00001,                                        | AZOBR_p1100082 | 3: 0.00007,                                                    |                                        |
| AZOLI_p40522 | 1: 0.00056, 2: 0.00082,<br>3: 0.00109, 4: 0.00063, | 1: 0.00074, 2: 0.00050,<br>3: 0.00051, 4: 0.00045, | AZOBR_p1100083 | 3: 0.00010,                                                    |                                        |
| AZOLI_p40529 | 1: 0.00009, 2: 0.00018,<br>3: 0.00025, 4: 0.00019, | 1: 0.00018, 2: 0.00017,<br>3: 0.00019, 4: 0.00019, | AZOBR_p1100090 |                                                                | 2: 0.00023,                            |
| AZOLI_p40530 | 1: 0.00057, 2: 0.00016,<br>3: 0.00029, 4: 0.00056, | 1: 0.00019, 2: 0.00053,<br>3: 0.00034, 4: 0.00029, | AZOBR_p1100091 |                                                                | 1: 0.00063, 3: 0.00085,                |
| AZOLI_p40531 | 3: 0.00040,                                        | 2: 0.00014, 3: 0.00030,                            | AZOBR_p1100092 | 4: 0.00029,                                                    |                                        |
| AZOLI_p40537 | 1: 0.00006, 4: 0.00008,                            | 2: 0.00012, 3: 0.00022,<br>4: 0.00020,             | AZOBR_p1100098 | 1: 0.00085, 3: 0.00072, 5: 0.00025,                            |                                        |
| AZOLI_p40538 | 1: 0.00047, 2: 0.00159,<br>3: 0.00199, 4: 0.00217, | 1: 0.00351, 2: 0.00322,<br>3: 0.00354, 4: 0.00299, | AZOBR_p1100099 | 4: 0.00012,                                                    | 1: 0.00027, 2: 0.00019,<br>3: 0.00021, |
| AZOLI_p40561 |                                                    | 2: 0.00024,                                        | AZOBR_p1100102 | 3: 0.00012,                                                    |                                        |
| AZOLI_p40585 |                                                    | 1: 0.00022, 2: 0.00015,<br>3: 0.00029, 4: 0.00022, | AZOBR_p1100108 |                                                                |                                        |
| AZOLI_p40593 |                                                    | 2: 0.00020, 3: 0.00022,<br>4: 0.00012,             | AZOBR_p1110003 | 1: 0.00030, 2: 0.00038, 3: 0.00022,<br>4: 0.00033, 5: 0.00030, | 1: 0.00011, 2: 0.00009,<br>3: 0.00019, |
| AZOLI_p40594 |                                                    | 1: 0.00022, 2: 0.00044,<br>3: 0.00013, 4: 0.00031, | AZOBR_p1110013 |                                                                |                                        |
| AZOLI_p40599 | 4: 0.00011,                                        |                                                    | AZOBR_p1110014 |                                                                |                                        |
| AZOLI_p40607 | 1: 0.00016, 2: 0.00008,                            |                                                    | AZOBR_p1110016 | 1: 0.00008, 5: 0.00006,                                        | 1: 0.00008, 3: 0.00010,                |
| AZOLI_p40614 | 3: 0.00051, 4: 0.00019,                            | 3: 0.00010,                                        | AZOBR_p1110017 | 4: 0.00008,                                                    |                                        |
| AZOLI_p40616 | 1: 0.00095, 2: 0.00076,<br>3: 0.00115, 4: 0.00099, | 1: 0.00086, 2: 0.00057,<br>3: 0.00077, 4: 0.00054, | AZOBR_p1110021 | 1: 0.00138, 2: 0.00091, 3: 0.00103,<br>4: 0.00120, 5: 0.00151, | 1: 0.00137, 2: 0.00120,<br>3: 0.00147, |
| AZOLI_p40619 | 1: 0.00036, 4: 0.00051,                            |                                                    | AZOBR_p1110022 | 4: 0.00019,                                                    |                                        |
| AZOLI_p40620 | 1: 0.00012, 4: 0.00017,                            | 4: 0.00008,                                        | AZOBR_p1110032 | 2: 0.00005, 3: 0.00005, 4: 0.00004,                            | 2: 0.00015, 3: 0.00015,                |
| AZOLI_p40622 | 1: 0.00219, 2: 0.00124,<br>3: 0.00104, 4: 0.00159, | 1: 0.00084, 2: 0.00096,<br>3: 0.00096, 4: 0.00077, | AZOBR_p1110033 | 1: 0.00007, 2: 0.00015, 3: 0.00011,<br>4: 0.00015, 5: 0.00007, | 1: 0.00004, 2: 0.00003,<br>3: 0.00009, |
| AZOLI_p40624 | 2: 0.00084, 3: 0.00330,<br>4: 0.00226,             | 1: 0.00098, 2: 0.00094,<br>3: 0.00089, 4: 0.00119, | AZOBR_p1110035 | 2: 0.00011, 4: 0.00006, 5: 0.00008,                            | 1: 0.00012, 2: 0.00011,<br>3: 0.00013, |
| AZOLI_p40625 |                                                    | 2: 0.00004,                                        | AZOBR_p1110039 | 1: 0.00031, 2: 0.00035, 3: 0.00011,<br>4: 0.00009, 5: 0.00012, | 1: 0.00014, 2: 0.00013,<br>3: 0.00025, |
| AZOLI_p40626 | 1: 0.00086, 2: 0.00139,<br>3: 0.00141, 4: 0.00107, | 1: 0.00185, 2: 0.00205,<br>3: 0.00181, 4: 0.00128, | AZOBR_p1110040 | 1: 0.00063, 2: 0.00031, 3: 0.00065,<br>4: 0.00072, 5: 0.00053, | 1: 0.00009, 2: 0.00025,<br>3: 0.00013, |
| AZOLI_p40633 | 4: 0.00005,                                        |                                                    | AZOBR_p1110041 | 2: 0.00033, 3: 0.00035, 4: 0.00011,                            |                                        |
| AZOLI_p40634 | 1: 0.00242, 2: 0.00173,<br>3: 0.00341, 4: 0.00165, | 1: 0.00543, 2: 0.00690,<br>3: 0.00542, 4: 0.00480, | AZOBR_p1110043 | 3: 0.00017, 4: 0.00013, 5: 0.00007,                            | 1: 0.00053, 2: 0.00018,<br>3: 0.00069, |
| AZOLI_p40635 | 4: 0.00016,                                        |                                                    | AZOBR_p1110044 | 1: 0.00016, 3: 0.00018, 4: 0.00007,                            | 1: 0.00017, 2: 0.00015,<br>3: 0.00016, |
| AZOLI_p40637 | 1: 0.00005, 4: 0.00005,                            |                                                    | AZOBR_p1110045 | 5: 0.00011,                                                    | 1: 0.00007, 2: 0.00008,                |
| AZOLI_p40638 |                                                    | 2: 0.00005,                                        | AZOBR_p1110046 | 1: 0.00257, 2: 0.00291, 3: 0.00256,<br>4: 0.00126, 5: 0.00177, | 1: 0.00348, 2: 0.00246,<br>3: 0.00319, |
| AZOLI_p40641 | 1: 0.00009,                                        |                                                    | AZOBR_p1110047 | 1: 0.00143, 2: 0.00118, 3: 0.00146,<br>4: 0.00145, 5: 0.00092, | 1: 0.00092, 2: 0.00125,<br>3: 0.00107, |
| AZOLI_p40642 | 1: 0.00024, 2: 0.00021,<br>3: 0.00206, 4: 0.00024, | 1: 0.00025, 2: 0.00031,<br>4: 0.00018,             | AZOBR_p1110048 | 4: 0.00012,                                                    |                                        |
| AZOLI_p40643 | 1: 0.00013, 2: 0.00039,<br>3: 0.00012, 4: 0.00029, | 1: 0.00065, 2: 0.00092,<br>3: 0.00046, 4: 0.00066, | AZOBR_p1110049 | 1: 0.00018, 2: 0.00016, 3: 0.00021,<br>4: 0.00024, 5: 0.00012, | 1: 0.00011, 2: 0.00031,<br>3: 0.00011, |
| AZOLI_p40647 | 2: 0.00036, 4: 0.00054,                            | 2: 0.00035, 3: 0.00019,<br>4: 0.00031,             | AZOBR_p1110051 |                                                                |                                        |
| AZOLI_p40647 |                                                    | 1: 0.00045, 2: 0.00015,<br>3: 0.00024, 4: 0.00026, | AZOBR_p1110053 |                                                                |                                        |
| AZOLI_p40649 |                                                    | 1: 0.00011, 3: 0.00006,<br>4: 0.00005,             | AZOBR_p1110054 | 4: 0.00011, 5: 0.00013,                                        | 3: 0.00005,                            |
| AZOLI_p40651 | 1: 0.00139, 2: 0.00116,<br>3: 0.00239, 4: 0.00104, | 1: 0.00025, 2: 0.00071,<br>3: 0.00026, 4: 0.00016, | AZOBR_p1110056 | 2: 0.00011, 3: 0.00014, 4: 0.00028,<br>5: 0.00028,             | 1: 0.00016, 2: 0.00012,<br>3: 0.00033, |
| AZOLI_p40653 | 4: 0.00003,                                        | 4: 0.00005,                                        | AZOBR_p1110059 | 1: 0.00040, 2: 0.00018, 3: 0.00017,<br>4: 0.00041, 5: 0.00027, | 1: 0.00019, 3: 0.00031,                |
| AZOLI_p40654 |                                                    | 3: 0.00008,                                        | AZOBR_p1110060 | 1: 0.00011, 2: 0.00024, 3: 0.00014,<br>5: 0.00015,             | 2: 0.00024,                            |
| AZOLI_p40656 | 1: 0.00770, 2: 0.00697,<br>3: 0.00172, 4: 0.00643, | 1: 0.00229, 2: 0.00316,<br>3: 0.00315, 4: 0.00343, | AZOBR_p1110063 | 1: 0.00005, 3: 0.00004, 4: 0.00017,<br>5: 0.00008,             | 1: 0.00007, 2: 0.00013,<br>3: 0.00009, |
| AZOLI_p40658 | 3: 0.00033,                                        | 1: 0.00043, 2: 0.00062,<br>3: 0.00053, 4: 0.00053, | AZOBR_p1110065 |                                                                | 2: 0.00011,                            |
| AZOLI_p50014 |                                                    | 4: 0.00002,                                        | AZOBR_p1110069 |                                                                | 1: 0.00009, 2: 0.00003,<br>3: 0.00013, |
| AZOLI_p50036 | 1: 0.00006, 2: 0.00008,<br>3: 0.00035, 4: 0.00024, |                                                    | AZOBR_p1110075 | 1: 0.00107, 2: 0.00094, 3: 0.00104,<br>4: 0.00235, 5: 0.00207, | 1: 0.00127, 2: 0.00104,<br>3: 0.00174, |
| AZOLI_p50060 | 1: 0.00006, 2: 0.00009,<br>4: 0.00013,             | 1: 0.00024, 2: 0.00011,<br>3: 0.00016, 4: 0.00020, | AZOBR_p1110076 | 1: 0.00740, 2: 0.00936, 3: 0.00890,<br>4: 0.00700, 5: 0.01412, | 1: 0.00781, 2: 0.00603,<br>3: 0.00767, |
| AZOLI_p50061 | 1: 0.00012, 2: 0.00007,<br>3: 0.00014, 4: 0.00019, | 1: 0.00010, 2: 0.00015,<br>3: 0.00027, 4: 0.00017, | AZOBR_p1110080 | 1: 0.00041, 2: 0.00016, 3: 0.00022,<br>4: 0.00028, 5: 0.00008, | 1: 0.00017, 2: 0.00030,<br>3: 0.00012, |
| AZOLI_p50062 | 1: 0.00008, 3: 0.00035,<br>4: 0.00021,             | 1: 0.00021, 2: 0.00012,<br>3: 0.00022, 4: 0.00014, | AZOBR_p1110081 |                                                                | 3: 0.00006,                            |
| AZOLI_p50063 | 1: 0.00016, 4: 0.00017,                            | 1: 0.00012, 2: 0.00015,<br>4: 0.00031,             | AZOBR_p1110082 | 3: 0.00019, 4: 0.00006, 5: 0.00006,                            | 2: 0.00023, 3: 0.00011,                |
| AZOLI_p50080 | 1: 0.00019, 2: 0.00016,<br>4: 0.00022,             | 3: 0.00007,                                        | AZOBR_p1110083 |                                                                | 3: 0.00009,                            |
| AZOLI_p50090 | 1: 0.00005, 2: 0.00003,<br>4: 0.00006,             |                                                    | AZOBR_p1110084 | 1: 0.00036, 2: 0.00055, 3: 0.00048,<br>4: 0.00077, 5: 0.00075, | 1: 0.00019, 2: 0.00019,<br>3: 0.00039, |

|              |                                                 |                                                 |                |                                                             |                                     |
|--------------|-------------------------------------------------|-------------------------------------------------|----------------|-------------------------------------------------------------|-------------------------------------|
| AZOLI_p50095 | 4: 0.00008,                                     |                                                 | AZOBR_p1110087 | 4: 0.00024, 5: 0.00016,                                     | 1: 0.00015, 2: 0.00034, 3: 0.00081, |
| AZOLI_p50096 |                                                 | 4: 0.00008,                                     | AZOBR_p1110097 | 2: 0.00017, 3: 0.00012, 4: 0.00013,                         | 1: 0.00033, 2: 0.00027, 3: 0.00026, |
| AZOLI_p50098 |                                                 | 3: 0.00019, 4: 0.00020,                         | AZOBR_p1110099 | 1: 0.00094, 2: 0.00083, 3: 0.00080,                         | 1: 0.00043, 2: 0.00078, 3: 0.00042, |
| AZOLI_p50099 | 4: 0.00004,                                     | 4: 0.00003,                                     | AZOBR_p1110100 | 1: 0.00014, 4: 0.00014, 5: 0.00004,                         | 2: 0.00015, 3: 0.00011,             |
| AZOLI_p50101 | 1: 0.00011, 2: 0.00009, 3: 0.00005, 4: 0.00015, | 1: 0.00002, 2: 0.00005, 3: 0.00004, 4: 0.00005, | AZOBR_p1110104 | 1: 0.00024, 3: 0.00010, 5: 0.00008,                         | 1: 0.00051, 2: 0.00058, 3: 0.00042, |
| AZOLI_p50103 |                                                 | 4: 0.00008,                                     | AZOBR_p1110105 |                                                             | 3: 0.00007,                         |
| AZOLI_p50106 | 1: 0.00013, 2: 0.00020, 4: 0.00008,             | 1: 0.00020, 2: 0.00022, 3: 0.00035, 4: 0.00025, | AZOBR_p1110108 |                                                             | 1: 0.00003, 2: 0.00007, 3: 0.00003, |
| AZOLI_p50117 | 4: 0.00002,                                     |                                                 | AZOBR_p1110117 |                                                             | 2: 0.00008,                         |
| AZOLI_p50138 | 4: 0.00009,                                     |                                                 | AZOBR_p1110126 | 2: 0.00007,                                                 | 3: 0.00005,                         |
| AZOLI_p50151 | 1: 0.00030, 2: 0.00030, 4: 0.00038,             | 1: 0.00008, 2: 0.00008, 3: 0.00007, 4: 0.00009, | AZOBR_p1110127 | 3: 0.00015, 4: 0.00029, 5: 0.00012,                         | 2: 0.00044, 3: 0.00027,             |
| AZOLI_p50152 | 1: 0.00024, 4: 0.00024,                         | 1: 0.00008,                                     | AZOBR_p1110128 | 2: 0.00018, 3: 0.00012, 4: 0.00033, 5: 0.00010,             | 1: 0.00013, 2: 0.00025, 3: 0.00047, |
| AZOLI_p50154 | 1: 0.00073, 2: 0.00079, 4: 0.00085,             | 1: 0.00032, 2: 0.00041, 3: 0.00045, 4: 0.00045, | AZOBR_p1110129 | 1: 0.00029, 3: 0.00016, 4: 0.00020,                         | 3: 0.00030,                         |
| AZOLI_p50160 | 1: 0.00083, 2: 0.00067, 4: 0.00043,             | 3: 0.00036, 4: 0.00029,                         | AZOBR_p1110133 | 1: 0.00286, 2: 0.00216, 3: 0.00254, 4: 0.00160, 5: 0.00117, | 1: 0.00380, 2: 0.00423, 3: 0.00271, |
| AZOLI_p50162 | 1: 0.00606, 2: 0.00484, 3: 0.00100, 4: 0.00469, | 1: 0.00661, 2: 0.00721, 3: 0.00647, 4: 0.00660, | AZOBR_p1110136 | 3: 0.00014,                                                 | 3: 0.00010,                         |
| AZOLI_p50164 |                                                 | 1: 0.00015, 2: 0.00019, 4: 0.00008,             | AZOBR_p1110140 |                                                             |                                     |
| AZOLI_p50164 |                                                 | 1: 0.00015, 2: 0.00019, 4: 0.00008,             | AZOBR_p1110150 |                                                             |                                     |
| AZOLI_p50165 |                                                 | 3: 0.00020, 4: 0.00013,                         | AZOBR_p1110152 |                                                             |                                     |
| AZOLI_p50165 |                                                 | 3: 0.00020, 4: 0.00013,                         | AZOBR_p1110165 |                                                             |                                     |
| AZOLI_p50168 | 1: 0.00052, 2: 0.00049, 4: 0.00036,             |                                                 | AZOBR_p1110167 |                                                             |                                     |
| AZOLI_p50173 | 1: 0.00018,                                     |                                                 | AZOBR_p1110170 | 3: 0.00005, 4: 0.00007,                                     | 2: 0.00008, 3: 0.00002,             |
| AZOLI_p50175 | 1: 0.00035, 2: 0.00043, 3: 0.00153, 4: 0.00087, | 1: 0.00079, 2: 0.00079, 3: 0.00104, 4: 0.00064, | AZOBR_p1120005 | 5: 0.00018,                                                 |                                     |
| AZOLI_p50182 |                                                 | 1: 0.00030, 2: 0.00023, 3: 0.00019, 4: 0.00013, | AZOBR_p1120007 |                                                             |                                     |
| AZOLI_p50183 | 1: 0.00053, 2: 0.00057, 3: 0.00011, 4: 0.00045, | 1: 0.00021, 2: 0.00028, 3: 0.00048, 4: 0.00039, | AZOBR_p1120008 |                                                             | 2: 0.00006,                         |
| AZOLI_p50184 | 2: 0.00011,                                     |                                                 | AZOBR_p1120009 |                                                             |                                     |
| AZOLI_p50186 |                                                 | 4: 0.00005,                                     | AZOBR_p1120011 | 1: 0.00229, 2: 0.00352, 3: 0.00228, 4: 0.00267, 5: 0.00327, | 1: 0.00332, 2: 0.00298, 3: 0.00315, |
| AZOLI_p50188 |                                                 | 1: 0.00006, 2: 0.00006, 3: 0.00011, 4: 0.00005, | AZOBR_p1120013 | 5: 0.00006,                                                 |                                     |
| AZOLI_p50191 | 2: 0.00006, 4: 0.00005,                         | 1: 0.00039, 2: 0.00019, 3: 0.00033, 4: 0.00037, | AZOBR_p1120014 | 2: 0.00007, 3: 0.00007, 4: 0.00004, 5: 0.00004,             |                                     |
| AZOLI_p50201 | 1: 0.00013, 2: 0.00029, 4: 0.00017,             |                                                 | AZOBR_p1120016 | 1: 0.00247, 2: 0.00198, 3: 0.00220, 4: 0.00208, 5: 0.00213, | 1: 0.00237, 2: 0.00204, 3: 0.00195, |
| AZOLI_p50207 | 1: 0.00058, 2: 0.00022, 3: 0.00138, 4: 0.00044, | 1: 0.00287, 2: 0.00276, 3: 0.00300, 4: 0.00382, | AZOBR_p1120020 | 1: 0.00024, 2: 0.00026, 3: 0.00041, 4: 0.00049, 5: 0.00025, | 1: 0.00008, 2: 0.00017, 3: 0.00007, |
| AZOLI_p50210 | 1: 0.00231, 2: 0.00151, 3: 0.00167, 4: 0.00156, | 1: 0.00247, 2: 0.00275, 3: 0.00248, 4: 0.00281, | AZOBR_p1120021 | 1: 0.00015, 3: 0.00010, 4: 0.00015, 5: 0.00015,             | 1: 0.00011, 2: 0.00014, 3: 0.00018, |
| AZOLI_p50212 | 2: 0.00003,                                     | 4: 0.00003,                                     | AZOBR_p1120024 |                                                             |                                     |
| AZOLI_p50216 |                                                 | 4: 0.00014,                                     | AZOBR_p1120026 | 1: 0.00262, 2: 0.00178, 3: 0.00155, 4: 0.00292, 5: 0.00222, | 1: 0.00129, 2: 0.00059, 3: 0.00175, |
| AZOLI_p50217 | 1: 0.00012,                                     |                                                 | AZOBR_p1120027 | 1: 0.00028, 2: 0.00050, 3: 0.00036, 5: 0.00015,             | 1: 0.00014, 2: 0.00051, 3: 0.00018, |
| AZOLI_p50218 | 1: 0.00010, 4: 0.00011,                         | 1: 0.00007,                                     | AZOBR_p1120028 | 1: 0.00010, 2: 0.00015, 3: 0.00021, 4: 0.00007, 5: 0.00005, | 2: 0.00008, 3: 0.00013,             |
| AZOLI_p50219 | 4: 0.00036,                                     |                                                 | AZOBR_p1120033 |                                                             |                                     |
| AZOLI_p50220 |                                                 | 1: 0.00013, 2: 0.00022, 3: 0.00017, 4: 0.00033, | AZOBR_p1120035 |                                                             |                                     |
| AZOLI_p50224 | 2: 0.00074, 3: 0.00162, 4: 0.00028,             | 2: 0.00016,                                     | AZOBR_p1120038 |                                                             |                                     |
| AZOLI_p50225 |                                                 | 1: 0.00030, 3: 0.00026, 4: 0.00010,             | AZOBR_p1120039 | 3: 0.00013, 4: 0.00013, 5: 0.00011,                         | 2: 0.00009,                         |
| AZOLI_p50233 |                                                 | 2: 0.00031, 3: 0.00011, 4: 0.00018,             | AZOBR_p1120040 |                                                             | 1: 0.00018, 2: 0.00008, 3: 0.00043, |
| AZOLI_p50235 | 2: 0.00005, 4: 0.00009,                         | 1: 0.00034, 2: 0.00025, 3: 0.00033, 4: 0.00013, | AZOBR_p1120044 | 1: 0.00020,                                                 | 2: 0.00015, 3: 0.00013,             |
| AZOLI_p50239 | 1: 0.00009,                                     |                                                 | AZOBR_p1120045 | 5: 0.00017,                                                 |                                     |
| AZOLI_p50240 | 1: 0.00002,                                     |                                                 | AZOBR_p1120047 | 1: 0.00007, 2: 0.00006,                                     | 2: 0.00007, 3: 0.00006,             |
| AZOLI_p50241 |                                                 | 1: 0.00009,                                     | AZOBR_p1120048 | 1: 0.00006,                                                 | 2: 0.00004,                         |
| AZOLI_p50242 |                                                 | 3: 0.00008, 4: 0.00006,                         | AZOBR_p1120049 |                                                             |                                     |
| AZOLI_p50244 | 1: 0.00005,                                     | 2: 0.00005,                                     | AZOBR_p1120051 |                                                             |                                     |
| AZOLI_p50247 | 1: 0.00031, 2: 0.00033, 3: 0.00026, 4: 0.00044, | 1: 0.00075, 2: 0.00056, 3: 0.00071, 4: 0.00048, | AZOBR_p1120052 | 1: 0.00033, 2: 0.00032, 3: 0.00026, 4: 0.00036, 5: 0.00035, | 1: 0.00124, 2: 0.00145, 3: 0.00088, |
| AZOLI_p50248 | 4: 0.00017,                                     | 4: 0.00007,                                     | AZOBR_p1120056 | 3: 0.00009, 4: 0.00012,                                     | 3: 0.00005,                         |
| AZOLI_p50251 |                                                 | 4: 0.00005,                                     | AZOBR_p1120060 |                                                             |                                     |
| AZOLI_p50252 | 4: 0.00009,                                     | 3: 0.00004,                                     | AZOBR_p1120061 |                                                             |                                     |
| AZOLI_p50253 |                                                 | 2: 0.00033, 4: 0.00022,                         | AZOBR_p1120064 | 2: 0.00019, 4: 0.00015, 5: 0.00015,                         | 1: 0.00010, 2: 0.00012, 3: 0.00016, |
| AZOLI_p50254 |                                                 | 2: 0.00009,                                     | AZOBR_p1130006 |                                                             | 3: 0.00005,                         |
| AZOLI_p50256 |                                                 | 4: 0.00005,                                     | AZOBR_p1130008 | 3: 0.00011,                                                 |                                     |
| AZOLI_p50258 |                                                 | 1: 0.00008,                                     | AZOBR_p1130019 |                                                             | 1: 0.00006,                         |
| AZOLI_p50259 | 1: 0.00012, 2: 0.00034, 3: 0.00030, 4: 0.00023, | 1: 0.00015, 2: 0.00035, 3: 0.00032, 4: 0.00021, | AZOBR_p1130021 |                                                             |                                     |
| AZOLI_p50265 | 1: 0.00033, 2: 0.00013, 4: 0.00040,             | 1: 0.00101, 2: 0.00026, 3: 0.00036, 4: 0.00034, | AZOBR_p1130022 |                                                             |                                     |

|              |                                                 |                                                 |                |                                                             |                                                             |
|--------------|-------------------------------------------------|-------------------------------------------------|----------------|-------------------------------------------------------------|-------------------------------------------------------------|
| AZOLI_p50268 | 3: 0.00051,                                     | 3: 0.00026, 4: 0.00028,                         | AZOBR_p1130024 | 1: 0.00016, 2: 0.00011, 3: 0.00020, 4: 0.00017, 5: 0.00014, | 1: 0.00008, 2: 0.00009, 3: 0.00010,                         |
| AZOLI_p50274 |                                                 | 1: 0.00020, 2: 0.00021, 3: 0.00027, 4: 0.00025, | AZOBR_p1130025 |                                                             | 1: 0.00025, 3: 0.00060,                                     |
| AZOLI_p50276 |                                                 | 2: 0.00007, 4: 0.00013,                         | AZOBR_p1130026 |                                                             | 1: 0.00006,                                                 |
| AZOLI_p50282 | 4: 0.00025,                                     | 2: 0.00034, 4: 0.00020,                         | AZOBR_p1130039 |                                                             |                                                             |
| AZOLI_p50283 |                                                 | 1: 0.00005, 4: 0.00004,                         | AZOBR_p1130041 |                                                             | 3: 0.00010,                                                 |
| AZOLI_p50284 | 1: 0.00006,                                     | 1: 0.00006, 4: 0.00008,                         | AZOBR_p1130044 |                                                             |                                                             |
| AZOLI_p50286 | 4: 0.00008,                                     |                                                 | AZOBR_p1130051 | 4: 0.00016,                                                 |                                                             |
| AZOLI_p50297 | 1: 0.00018, 2: 0.00048, 4: 0.00067,             | 2: 0.00029, 4: 0.00026,                         | AZOBR_p1130052 |                                                             |                                                             |
| AZOLI_p50299 | 1: 0.00269, 2: 0.00266, 3: 0.00358, 4: 0.00240, | 1: 0.00201, 2: 0.00216, 3: 0.00182, 4: 0.00342, | AZOBR_p1130056 | 3: 0.00004, 4: 0.00005,                                     | 1: 0.00006, 3: 0.00005,                                     |
| AZOLI_p50300 | 1: 0.00421, 2: 0.00329, 3: 0.00373, 4: 0.00422, | 1: 0.00202, 2: 0.00251, 3: 0.00195, 4: 0.00191, | AZOBR_p1130057 | 3: 0.00007, 4: 0.00011,                                     | 1: 0.00010, 3: 0.00010,                                     |
| AZOLI_p50301 | 1: 0.00058, 2: 0.00090, 3: 0.00011, 4: 0.00063, | 1: 0.00020, 2: 0.00023, 3: 0.00037, 4: 0.00017, | AZOBR_p1130061 | 4: 0.00006,                                                 |                                                             |
| AZOLI_p50307 |                                                 | 1: 0.00017, 2: 0.00011, 4: 0.00007,             | AZOBR_p1130062 | 2: 0.00005, 3: 0.00007, 4: 0.00004, 5: 0.00006,             | 1: 0.00016, 2: 0.00016, 3: 0.00033,                         |
| AZOLI_p50317 |                                                 | 3: 0.00011, 4: 0.00009,                         | AZOBR_p1130065 |                                                             | 2: 0.00003,                                                 |
| AZOLI_p50318 |                                                 | 1: 0.00035, 2: 0.00010, 3: 0.00020, 4: 0.00018, | AZOBR_p1130067 |                                                             |                                                             |
| AZOLI_p50321 | 1: 0.00003,                                     |                                                 | AZOBR_p1130068 |                                                             |                                                             |
| AZOLI_p50336 | 4: 0.00008,                                     |                                                 | AZOBR_p1130071 | 4: 0.00028,                                                 | 1: 0.00013, 2: 0.00015, 3: 0.00030,                         |
| AZOLI_p50355 | 1: 0.00057, 2: 0.00061, 4: 0.00025,             |                                                 | AZOBR_p1130073 | 1: 0.00022, 2: 0.00011, 3: 0.00019, 4: 0.00024, 5: 0.00022, | 1: 0.00071, 2: 0.00049, 3: 0.00064,                         |
| AZOLI_p50360 |                                                 | 1: 0.00007, 2: 0.00008, 3: 0.00007, 4: 0.00013, | AZOBR_p1130074 | 3: 0.00030, 4: 0.00036,                                     | 2: 0.00013, 3: 0.00016,                                     |
| AZOLI_p50362 |                                                 | 1: 0.00047, 2: 0.00043, 3: 0.00039, 4: 0.00046, | AZOBR_p1130075 | 1: 0.00024, 2: 0.00117, 3: 0.00102, 4: 0.00058, 5: 0.00066, | 1: 0.00108, 2: 0.00079, 3: 0.00037,                         |
| AZOLI_p50365 |                                                 | 3: 0.00009, 4: 0.00004,                         | AZOBR_p1130076 | 1: 0.00016, 2: 0.00007, 3: 0.00030, 4: 0.00014, 5: 0.00014, | 3: 0.00007,                                                 |
| AZOLI_p50366 | 1: 0.00012, 4: 0.00007,                         |                                                 | AZOBR_p1130077 | 3: 0.00013, 4: 0.00011, 5: 0.00014,                         | 1: 0.00017, 3: 0.00013,                                     |
| AZOLI_p50367 |                                                 | 1: 0.00003,                                     | AZOBR_p1130080 | 1: 0.00072, 2: 0.00037, 3: 0.00066, 4: 0.00049, 5: 0.00037, | 1: 0.00057, 2: 0.00039, 3: 0.00059,                         |
| AZOLI_p50380 | 4: 0.00005,                                     | 1: 0.00006,                                     | AZOBR_p1130088 | 1: 0.00038, 3: 0.00019, 4: 0.00023, 5: 0.00015,             | 2: 0.00024, 3: 0.00024,                                     |
| AZOLI_p50389 | 1: 0.00005, 2: 0.00005, 4: 0.00004,             |                                                 | AZOBR_p1130089 |                                                             |                                                             |
| AZOLI_p50394 | 1: 0.00008, 2: 0.00020, 4: 0.00007,             |                                                 | AZOBR_p1130090 |                                                             |                                                             |
| AZOLI_p50397 |                                                 | 2: 0.00019, 3: 0.00016, 4: 0.00013,             | AZOBR_p1130091 | 1: 0.00004,                                                 |                                                             |
| AZOLI_p50402 | 1: 0.00013, 2: 0.00008, 4: 0.00015,             |                                                 | AZOBR_p1130093 | 1: 0.00009, 2: 0.00013, 3: 0.00014, 4: 0.00043, 5: 0.00018, | 1: 0.00011, 2: 0.00019, 3: 0.00014,                         |
| AZOLI_p50404 | 2: 0.00011,                                     | 1: 0.00007, 2: 0.00021, 3: 0.00016, 4: 0.00022, | AZOBR_p1130095 |                                                             |                                                             |
| AZOLI_p50406 | 1: 0.00185, 2: 0.00140, 3: 0.00228, 4: 0.00076, | 1: 0.00080, 2: 0.00122, 3: 0.00069, 4: 0.00080, | AZOBR_p1130096 | 1: 0.00015, 3: 0.00013,                                     |                                                             |
| AZOLI_p50414 | 4: 0.00009,                                     |                                                 | AZOBR_p1130097 | 4: 0.00008, 5: 0.00008,                                     |                                                             |
| AZOLI_p50415 | 1: 0.00011, 2: 0.00011, 3: 0.00031, 4: 0.00019, | 1: 0.00011, 2: 0.00014, 3: 0.00020, 4: 0.00016, | AZOBR_p1130098 |                                                             |                                                             |
| AZOLI_p50428 |                                                 | 1: 0.00035, 2: 0.00054, 3: 0.00030, 4: 0.00027, | AZOBR_p1130099 | 2: 0.00006, 3: 0.00006, 4: 0.00006, 5: 0.00006,             | 1: 0.00010, 2: 0.00006, 3: 0.00008,                         |
| AZOLI_p60004 | 2: 0.00004,                                     |                                                 | AZOBR_p1130101 | 1: 0.00008, 4: 0.00008, 5: 0.00011,                         | 1: 0.00015, 3: 0.00017, 1: 0.00034, 2: 0.00033, 3: 0.00049, |
| AZOLI_p60007 | 3: 0.00011,                                     | 4: 0.00006,                                     | AZOBR_p1130105 | 3: 0.00010, 4: 0.00008,                                     | 3: 0.00005,                                                 |
| AZOLI_p60008 | 1: 0.00024, 2: 0.00032, 4: 0.00035,             | 1: 0.00028, 2: 0.00020, 3: 0.00022, 4: 0.00014, | AZOBR_p1130106 |                                                             | 1: 0.00161, 2: 0.00217, 3: 0.00152,                         |
| AZOLI_p60009 | 1: 0.00003, 2: 0.00005,                         | 2: 0.00003,                                     | AZOBR_p1130109 | 1: 0.00102, 2: 0.00168, 3: 0.00202, 4: 0.00163, 5: 0.00154, | 3: 0.00044,                                                 |
| AZOLI_p60012 |                                                 | 2: 0.00005, 3: 0.00005,                         | AZOBR_p1130110 |                                                             |                                                             |
| AZOLI_p60015 | 1: 0.00010, 2: 0.00007,                         | 1: 0.00007, 3: 0.00014, 4: 0.00006,             | AZOBR_p1130112 |                                                             | 3: 0.00008,                                                 |
| AZOLI_p60016 |                                                 | 2: 0.00004, 3: 0.00007,                         | AZOBR_p1130116 |                                                             | 3: 0.00007,                                                 |
| AZOLI_p60023 | 4: 0.00013,                                     | 3: 0.00022, 4: 0.00009,                         | AZOBR_p1130117 | 3: 0.00002,                                                 |                                                             |
| AZOLI_p60034 | 1: 0.00005, 2: 0.00005,                         |                                                 | AZOBR_p1130118 | 1: 0.00276, 2: 0.00267, 3: 0.00224, 4: 0.00186, 5: 0.00190, | 1: 0.00177, 2: 0.00262, 3: 0.00224,                         |
| AZOLI_p60035 | 4: 0.00005,                                     | 3: 0.00007, 4: 0.00011,                         | AZOBR_p1130119 |                                                             | 1: 0.00012,                                                 |
| AZOLI_p60036 | 2: 0.00008,                                     | 1: 0.00008,                                     | AZOBR_p1130124 | 4: 0.00021,                                                 |                                                             |
| AZOLI_p60040 | 2: 0.00007, 3: 0.00035, 4: 0.00009,             | 1: 0.00011, 2: 0.00010, 4: 0.00006,             | AZOBR_p1130125 | 1: 0.00008, 3: 0.00010, 4: 0.00006, 5: 0.00006,             |                                                             |
| AZOLI_p60042 | 1: 0.00025, 2: 0.00025, 4: 0.00022,             | 1: 0.00007, 2: 0.00014, 3: 0.00012, 4: 0.00019, | AZOBR_p1130128 | 1: 0.00079, 2: 0.00124, 3: 0.00105, 4: 0.00158, 5: 0.00115, | 1: 0.00056, 2: 0.00026, 3: 0.00082,                         |
| AZOLI_p60045 | 1: 0.00004,                                     | 4: 0.00008,                                     | AZOBR_p1130129 | 1: 0.00522, 2: 0.00514, 3: 0.00418, 4: 0.00422, 5: 0.00793, | 1: 0.00295, 2: 0.00215, 3: 0.00249,                         |
| AZOLI_p60047 |                                                 | 3: 0.00010,                                     | AZOBR_p1130130 | 2: 0.00005, 4: 0.00008, 5: 0.00006,                         | 2: 0.00004,                                                 |
| AZOLI_p60050 |                                                 | 2: 0.00009,                                     | AZOBR_p1130132 |                                                             | 3: 0.00018,                                                 |
| AZOLI_p60053 |                                                 | 1: 0.00017, 3: 0.00024, 4: 0.00015,             | AZOBR_p1130136 |                                                             | 2: 0.00033,                                                 |
| AZOLI_p60055 |                                                 | 4: 0.00004,                                     | AZOBR_p1130137 |                                                             | 3: 0.00007,                                                 |
| AZOLI_p60056 | 4: 0.00007,                                     | 1: 0.00009, 3: 0.00011, 4: 0.00011,             | AZOBR_p1130142 | 3: 0.00011,                                                 |                                                             |
| AZOLI_p60059 |                                                 | 4: 0.00003,                                     | AZOBR_p1130143 | 1: 0.00026, 2: 0.00023, 3: 0.00026, 4: 0.00021, 5: 0.00036, | 1: 0.00022, 2: 0.00051, 3: 0.00035,                         |
| AZOLI_p60075 | 4: 0.00024,                                     |                                                 | AZOBR_p1130144 |                                                             | 1: 0.00018, 2: 0.00020, 3: 0.00028,                         |
| AZOLI_p60076 | 2: 0.00010, 4: 0.00020,                         |                                                 | AZOBR_p1130145 |                                                             | 1: 0.00016, 2: 0.00021, 3: 0.00022,                         |

|              |                                                    |                                                                               |                |                                                                |                                        |
|--------------|----------------------------------------------------|-------------------------------------------------------------------------------|----------------|----------------------------------------------------------------|----------------------------------------|
| AZOLI_p60084 | 1: 0.00014,                                        |                                                                               | AZOBR_p1130147 |                                                                | 1: 0.00010, 2: 0.00012,<br>3: 0.00015, |
| AZOLI_p60087 | 4: 0.00005,                                        |                                                                               | AZOBR_p1130148 |                                                                | 2: 0.00005,                            |
| AZOLI_p60091 | 1: 0.00010,                                        | 1: 0.00008, 2: 0.00013,<br>3: 0.00011, 4: 0.00014,                            | AZOBR_p1130149 | 4: 0.00004,                                                    | 1: 0.00021, 2: 0.00015,<br>3: 0.00022, |
| AZOLI_p60094 | 1: 0.00018, 2: 0.00007,<br>4: 0.00015,             | 1: 0.00032, 2: 0.00041,<br>3: 0.00023, 4: 0.00027,                            | AZOBR_p1130151 |                                                                | 2: 0.00009, 3: 0.00006,                |
| AZOLI_p60095 | 1: 0.00010, 2: 0.00007,<br>4: 0.00017,             | 1: 0.00024, 2: 0.00010,<br>3: 0.00032, 4: 0.00017,                            | AZOBR_p1130155 | 4: 0.00011, 5: 0.00006,                                        | 3: 0.00005,                            |
| AZOLI_p60101 |                                                    | 3: 0.00007, 4: 0.00005,                                                       | AZOBR_p1130156 |                                                                | 3: 0.00011,                            |
| AZOLI_p60105 |                                                    | 1: 0.00009, 2: 0.00017,<br>3: 0.00009, 4: 0.00008,                            | AZOBR_p1130158 |                                                                | 3: 0.00010,                            |
| AZOLI_p60109 |                                                    | 1: 0.00015, 4: 0.00008,                                                       | AZOBR_p1130159 |                                                                |                                        |
| AZOLI_p60124 |                                                    | 3: 0.00010,                                                                   | AZOBR_p1130161 | 5: 0.00008,                                                    |                                        |
| AZOLI_p60129 |                                                    | 3: 0.00004,                                                                   | AZOBR_p1130162 | 1: 0.00029, 3: 0.00041, 4: 0.00030,<br>5: 0.00016,             | 1: 0.00009, 2: 0.00021,<br>3: 0.00024, |
| AZOLI_p60137 |                                                    | 4: 0.00008,                                                                   | AZOBR_p1130163 | 1: 0.00012, 2: 0.00011, 3: 0.00017,<br>4: 0.00019, 5: 0.00044, | 1: 0.00013, 2: 0.00006,<br>3: 0.00017, |
| AZOLI_p60140 |                                                    | 1: 0.00009,                                                                   | AZOBR_p1130164 | 4: 0.00010, 5: 0.00007,                                        | 1: 0.00006,                            |
| AZOLI_p60155 | 4: 0.00005,                                        | 2: 0.00008,                                                                   | AZOBR_p1130166 | 1: 0.00013, 3: 0.00022, 4: 0.00027,<br>5: 0.00018,             | 1: 0.00044, 2: 0.00072,<br>3: 0.00077, |
| AZOLI_p60158 | 4: 0.00006,                                        |                                                                               | AZOBR_p1130167 |                                                                | 2: 0.00011,                            |
| AZOLI_p60160 |                                                    | 4: 0.00008,                                                                   | AZOBR_p1130169 | 1: 0.00411, 2: 0.00603, 3: 0.00516,<br>4: 0.00535, 5: 0.00733, | 1: 0.00497, 2: 0.00543,<br>3: 0.00526, |
| AZOLI_p60165 | 1: 0.00007, 2: 0.00011,                            | 1: 0.00007, 2: 0.00010,<br>3: 0.00011,                                        | AZOBR_p1130170 | 1: 0.00014, 3: 0.00005, 4: 0.00006,<br>5: 0.00006,             | 2: 0.00006, 3: 0.00003,                |
| AZOLI_p60168 | 1: 0.00280, 2: 0.00454,<br>3: 0.00120, 4: 0.00199, | 1: 0.00160, 2: 0.00261,<br>3: 0.00104, 4: 0.00158,                            | AZOBR_p1130183 | 4: 0.00007, 5: 0.00005,                                        | 3: 0.00008,                            |
| AZOLI_p60173 | 4: 0.00005,                                        | 1: 0.00010, 4: 0.00008,                                                       | AZOBR_p1130184 |                                                                |                                        |
| AZOLI_p60182 | 4: 0.00010,                                        | 2: 0.00007, 3: 0.00012,<br>4: 0.00008,                                        | AZOBR_p1130186 |                                                                | 3: 0.00015,                            |
| AZOLI_p60192 | 4: 0.00006,                                        | 1: 0.00007, 2: 0.00007,<br>3: 0.00016, 2: 0.00018,<br>3: 0.00017, 4: 0.00013, | AZOBR_p1130187 |                                                                |                                        |
| AZOLI_p60193 | 2: 0.00013,                                        | 1: 0.00020, 3: 0.00012,<br>4: 0.00017,                                        | AZOBR_p1130192 |                                                                |                                        |
| AZOLI_p60195 | 1: 0.00008, 4: 0.00017,                            | 1: 0.00015, 3: 0.00008,<br>4: 0.00010,                                        | AZOBR_p1130194 | 1: 0.00089, 2: 0.00066, 3: 0.00089,<br>4: 0.00036, 5: 0.00015, | 1: 0.00038, 2: 0.00049,<br>3: 0.00042, |
| AZOLI_p60196 | 2: 0.00008, 4: 0.00013,                            |                                                                               | AZOBR_p1130196 |                                                                | 2: 0.00004, 3: 0.00003,                |
| AZOLI_p60197 | 1: 0.00009, 4: 0.00005,                            | 2: 0.00006,                                                                   | AZOBR_p1130197 | 1: 0.00138, 2: 0.00067, 3: 0.00104,<br>4: 0.00116, 5: 0.00053, | 1: 0.00020,                            |
| AZOLI_p60198 |                                                    | 1: 0.00013, 4: 0.00016,                                                       | AZOBR_p1130198 | 1: 0.00062, 2: 0.00070, 3: 0.00065,<br>4: 0.00065, 5: 0.00051, | 1: 0.00030, 2: 0.00043,<br>3: 0.00033, |
| AZOLI_p60199 | 4: 0.00002,                                        | 1: 0.00002, 4: 0.00004,                                                       | AZOBR_p1130199 | 1: 0.00057, 2: 0.00082, 3: 0.00046,<br>4: 0.00075, 5: 0.00052, | 1: 0.00044, 2: 0.00035,<br>3: 0.00035, |
| AZOLI_p60207 |                                                    | 2: 0.00004,                                                                   | AZOBR_p1130200 |                                                                |                                        |
| AZOLI_p60210 | 2: 0.00026, 3: 0.00057,<br>4: 0.00031,             | 2: 0.00010, 4: 0.00009,                                                       | AZOBR_p1130208 |                                                                |                                        |
| AZOLI_p60215 | 1: 0.00022,                                        | 1: 0.00033,                                                                   | AZOBR_p1140002 |                                                                | 1: 0.00009,                            |
| AZOLI_p60217 | 4: 0.00066,                                        |                                                                               | AZOBR_p1140003 | 4: 0.00014, 5: 0.00014,                                        | 1: 0.00008, 3: 0.00016,                |
| AZOLI_p60218 | 1: 0.00044, 2: 0.00111,<br>3: 0.00103, 4: 0.00247, | 1: 0.00186, 2: 0.00208,<br>3: 0.00276, 4: 0.00197,                            | AZOBR_p1140004 | 4: 0.00015,                                                    | 2: 0.00011, 3: 0.00009,                |
| AZOLI_p60219 | 1: 0.00004,                                        |                                                                               | AZOBR_p1140005 | 5: 0.00008,                                                    | 2: 0.00013, 3: 0.00007,                |
| AZOLI_p60224 |                                                    | 3: 0.00022,                                                                   | AZOBR_p1140008 |                                                                |                                        |
| AZOLI_p60226 | 1: 0.00016, 4: 0.00005,                            | 1: 0.00005, 4: 0.00007,                                                       | AZOBR_p1140009 |                                                                |                                        |
| AZOLI_p60230 | 4: 0.00008,                                        |                                                                               | AZOBR_p1140010 | 1: 0.00100, 2: 0.00095, 3: 0.00059,<br>4: 0.00122, 5: 0.00095, | 1: 0.00069, 2: 0.00101,<br>3: 0.00072, |
| AZOLI_p60233 |                                                    | 4: 0.00010,                                                                   | AZOBR_p1140011 |                                                                | 1: 0.00009, 2: 0.00010,<br>3: 0.00004, |
| AZOLI_p60234 |                                                    | 4: 0.00009,                                                                   | AZOBR_p1140012 |                                                                |                                        |
| AZOLI_p60251 |                                                    | 1: 0.00018, 3: 0.00013,                                                       | AZOBR_p1140013 | 1: 0.00040, 3: 0.00047, 4: 0.00033,<br>5: 0.00011,             | 1: 0.00020, 2: 0.00029,<br>3: 0.00035, |
| AZOLI_p60253 |                                                    | 2: 0.00002, 4: 0.00003,                                                       | AZOBR_p1140016 | 2: 0.00054, 3: 0.00021,                                        | 1: 0.00016, 2: 0.00018,                |
| AZOLI_p60256 | 4: 0.00008,                                        | 1: 0.00023, 2: 0.00013,<br>4: 0.00016,                                        | AZOBR_p1140019 |                                                                | 2: 0.00010, 3: 0.00018,                |
| AZOLI_p60260 |                                                    | 3: 0.00002, 4: 0.00002,<br>1: 0.00005, 2: 0.00003,<br>3: 0.00003, 4: 0.00003, | AZOBR_p1140020 | 4: 0.00036,                                                    |                                        |
| AZOLI_p60261 | 4: 0.00008,                                        |                                                                               | AZOBR_p1140021 | 3: 0.00008, 4: 0.00007,                                        | 1: 0.00013, 2: 0.00011,<br>3: 0.00009, |
| AZOLI_p60264 | 4: 0.00020,                                        | 1: 0.00032, 3: 0.00017,                                                       | AZOBR_p1140022 |                                                                |                                        |
| AZOLI_p60265 | 4: 0.00006,                                        |                                                                               | AZOBR_p1140023 | 1: 0.00034, 3: 0.00020, 4: 0.00017,<br>5: 0.00013,             | 1: 0.00015, 2: 0.00025,<br>3: 0.00024, |
| AZOLI_p60266 | 1: 0.00013, 2: 0.00022,<br>4: 0.00023,             | 1: 0.00011, 2: 0.00008,<br>4: 0.00005,                                        | AZOBR_p1140024 | 5: 0.00008,                                                    |                                        |
|              |                                                    |                                                                               | AZOBR_p1140025 |                                                                |                                        |
|              |                                                    |                                                                               | AZOBR_p1140026 |                                                                |                                        |
|              |                                                    |                                                                               | AZOBR_p1140027 |                                                                |                                        |
|              |                                                    |                                                                               | AZOBR_p1140028 |                                                                |                                        |
|              |                                                    |                                                                               | AZOBR_p1140029 |                                                                |                                        |
|              |                                                    |                                                                               | AZOBR_p1140030 |                                                                |                                        |
|              |                                                    |                                                                               | AZOBR_p1140031 |                                                                |                                        |
|              |                                                    |                                                                               | AZOBR_p1140032 |                                                                |                                        |
|              |                                                    |                                                                               | AZOBR_p1140033 |                                                                |                                        |
|              |                                                    |                                                                               | AZOBR_p1140034 |                                                                |                                        |
|              |                                                    |                                                                               | AZOBR_p1140035 |                                                                |                                        |
|              |                                                    |                                                                               | AZOBR_p1140036 |                                                                |                                        |
|              |                                                    |                                                                               | AZOBR_p1140037 |                                                                |                                        |
|              |                                                    |                                                                               | AZOBR_p1140038 |                                                                |                                        |
|              |                                                    |                                                                               | AZOBR_p1140039 |                                                                |                                        |
|              |                                                    |                                                                               | AZOBR_p1140040 |                                                                |                                        |
|              |                                                    |                                                                               | AZOBR_p1140041 |                                                                |                                        |
|              |                                                    |                                                                               | AZOBR_p1140042 |                                                                |                                        |
|              |                                                    |                                                                               | AZOBR_p1140043 |                                                                |                                        |
|              |                                                    |                                                                               | AZOBR_p1140044 |                                                                |                                        |
|              |                                                    |                                                                               | AZOBR_p1140045 |                                                                |                                        |
|              |                                                    |                                                                               | AZOBR_p1140046 |                                                                |                                        |
|              |                                                    |                                                                               | AZOBR_p1140047 |                                                                |                                        |
|              |                                                    |                                                                               | AZOBR_p1140048 |                                                                |                                        |
|              |                                                    |                                                                               | AZOBR_p1140049 |                                                                |                                        |
|              |                                                    |                                                                               | AZOBR_p1140050 |                                                                |                                        |
|              |                                                    |                                                                               | AZOBR_p1140051 |                                                                |                                        |
|              |                                                    |                                                                               | AZOBR_p1140052 |                                                                |                                        |
|              |                                                    |                                                                               | AZOBR_p1140053 |                                                                |                                        |
|              |                                                    |                                                                               | AZOBR_p1140054 |                                                                |                                        |
|              |                                                    |                                                                               | AZOBR_p1140055 |                                                                |                                        |
|              |                                                    |                                                                               | AZOBR_p1140056 |                                                                |                                        |
|              |                                                    |                                                                               | AZOBR_p1140057 |                                                                |                                        |
|              |                                                    |                                                                               | AZOBR_p1140058 |                                                                |                                        |
|              |                                                    |                                                                               | AZOBR_p1140059 |                                                                |                                        |
|              |                                                    |                                                                               | AZOBR_p1140060 |                                                                |                                        |
|              |                                                    |                                                                               | AZOBR_p1140061 |                                                                |                                        |
|              |                                                    |                                                                               | AZOBR_p1140062 |                                                                |                                        |
|              |                                                    |                                                                               | AZOBR_p1140063 |                                                                |                                        |
|              |                                                    |                                                                               | AZOBR_p1140064 |                                                                |                                        |
|              |                                                    |                                                                               | AZOBR_p1140065 |                                                                |                                        |
|              |                                                    |                                                                               | AZOBR_p1140066 |                                                                |                                        |
|              |                                                    |                                                                               | AZOBR_p1140067 |                                                                |                                        |
|              |                                                    |                                                                               | AZOBR_p1140068 |                                                                |                                        |
|              |                                                    |                                                                               | AZOBR_p1140069 |                                                                |                                        |
|              |                                                    |                                                                               | AZOBR_p1140070 |                                                                |                                        |
|              |                                                    |                                                                               | AZOBR_p1140071 |                                                                |                                        |
|              |                                                    |                                                                               | AZOBR_p1140072 |                                                                |                                        |
|              |                                                    |                                                                               | AZOBR_p1140073 |                                                                |                                        |
|              |                                                    |                                                                               | AZOBR_p1140074 |                                                                |                                        |
|              |                                                    |                                                                               | AZOBR_p1140075 |                                                                |                                        |
|              |                                                    |                                                                               | AZOBR_p1140076 |                                                                |                                        |
|              |                                                    |                                                                               | AZOBR_p1140077 |                                                                |                                        |
|              |                                                    |                                                                               | AZOBR_p1140078 |                                                                |                                        |
|              |                                                    |                                                                               | AZOBR_p1140079 |                                                                |                                        |
|              |                                                    |                                                                               | AZOBR_p1140080 |                                                                |                                        |
|              |                                                    |                                                                               | AZOBR_p1140081 |                                                                |                                        |
|              |                                                    |                                                                               | AZOBR_p1140082 |                                                                |                                        |
|              |                                                    |                                                                               | AZOBR_p1140083 |                                                                |                                        |
|              |                                                    |                                                                               | AZOBR_p1140084 |                                                                |                                        |
|              |                                                    |                                                                               | AZOBR_p1140085 |                                                                |                                        |
|              |                                                    |                                                                               | AZOBR_p1140086 |                                                                |                                        |
|              |                                                    |                                                                               | AZOBR_p1140087 |                                                                |                                        |
|              |                                                    |                                                                               | AZOBR_p1140088 |                                                                |                                        |
|              |                                                    |                                                                               | AZOBR_p1140089 |                                                                |                                        |
|              |                                                    |                                                                               | AZOBR_p1140090 |                                                                |                                        |
|              |                                                    |                                                                               | AZOBR_p1140091 |                                                                |                                        |
|              |                                                    |                                                                               | AZOBR_p1140092 |                                                                |                                        |
|              |                                                    |                                                                               | AZOBR_p1140093 |                                                                |                                        |
|              |                                                    |                                                                               | AZOBR_p1140094 |                                                                |                                        |
|              |                                                    |                                                                               | AZOBR_p1140095 |                                                                |                                        |
|              |                                                    |                                                                               | AZOBR_p1140096 |                                                                |                                        |
|              |                                                    |                                                                               | AZOBR_p1140097 |                                                                |                                        |
|              |                                                    |                                                                               | AZOBR_p1140098 |                                                                |                                        |
|              |                                                    |                                                                               | AZOBR_p1140099 |                                                                |                                        |
|              |                                                    |                                                                               | AZOBR_p1140100 |                                                                |                                        |
|              |                                                    |                                                                               | AZOBR_p1140101 |                                                                |                                        |
|              |                                                    |                                                                               | AZOBR_p1140102 |                                                                |                                        |
|              |                                                    |                                                                               | AZOBR_p1140103 |                                                                |                                        |
|              |                                                    |                                                                               | AZOBR_p1140104 | 5: 0.00003,                                                    | 1: 0.00009, 2: 0.00008,<br>3: 0.00004, |
|              |                                                    |                                                                               | AZOBR_p1140106 | 1: 0.00004,                                                    | 1: 0.00011, 2: 0.00006,<br>3: 0.00016, |
|              |                                                    |                                                                               | AZOBR_p1140109 |                                                                | 1: 0.00005, 3: 0.00004,                |
|              |                                                    |                                                                               | AZOBR_p1140110 |                                                                |                                        |

|  |  |                |                                                                |                                                                                  |
|--|--|----------------|----------------------------------------------------------------|----------------------------------------------------------------------------------|
|  |  | AZOBR_p1140114 |                                                                | 1: 0.00012, 2: 0.00009,<br>3: 0.00019,                                           |
|  |  | AZOBR_p1140117 |                                                                |                                                                                  |
|  |  | AZOBR_p1140118 |                                                                |                                                                                  |
|  |  | AZOBR_p1140119 | 2: 0.00005, 4: 0.00009, 5: 0.00004,                            | 1: 0.00005, 2: 0.00013,<br>3: 0.00009,                                           |
|  |  | AZOBR_p1140120 | 4: 0.00004,                                                    |                                                                                  |
|  |  | AZOBR_p1140132 | 3: 0.00005,                                                    |                                                                                  |
|  |  | AZOBR_p1140133 | 2: 0.00029, 4: 0.00011, 5: 0.00011,                            |                                                                                  |
|  |  | AZOBR_p1150011 |                                                                |                                                                                  |
|  |  | AZOBR_p1150014 |                                                                |                                                                                  |
|  |  | AZOBR_p1150015 |                                                                |                                                                                  |
|  |  | AZOBR_p1150016 |                                                                |                                                                                  |
|  |  | AZOBR_p1150017 | 1: 0.00041, 3: 0.00015, 4: 0.00032,<br>5: 0.00016,             | 1: 0.00034, 2: 0.00051,<br>3: 0.00069,                                           |
|  |  | AZOBR_p1150021 |                                                                | 1: 0.00017, 2: 0.00019,                                                          |
|  |  | AZOBR_p1160003 | 1: 0.00012, 2: 0.00022, 3: 0.00021,<br>4: 0.00040, 5: 0.00028, | 2: 0.00009, 3: 0.00006,<br>1: 0.00053, 2: 0.00068,<br>3: 0.00084,                |
|  |  | AZOBR_p1160013 |                                                                |                                                                                  |
|  |  | AZOBR_p1160014 |                                                                |                                                                                  |
|  |  | AZOBR_p1160015 |                                                                |                                                                                  |
|  |  | AZOBR_p1160017 |                                                                | 2: 0.00024,                                                                      |
|  |  | AZOBR_p1160021 |                                                                |                                                                                  |
|  |  | AZOBR_p1160029 |                                                                |                                                                                  |
|  |  | AZOBR_p1160030 |                                                                | 3: 0.00012,                                                                      |
|  |  | AZOBR_p1160031 |                                                                |                                                                                  |
|  |  | AZOBR_p1160038 |                                                                |                                                                                  |
|  |  | AZOBR_p1160040 |                                                                |                                                                                  |
|  |  | AZOBR_p1160042 |                                                                |                                                                                  |
|  |  | AZOBR_p1160043 |                                                                |                                                                                  |
|  |  | AZOBR_p1160045 | 1: 0.00101, 2: 0.00165, 3: 0.00121,<br>4: 0.00138, 5: 0.00185, | 1: 0.00356, 2: 0.00276,<br>3: 0.00256,                                           |
|  |  | AZOBR_p1160046 | 1: 0.00020,                                                    | 2: 0.00030, 3: 0.00013,                                                          |
|  |  | AZOBR_p1160048 |                                                                |                                                                                  |
|  |  | AZOBR_p1160051 |                                                                |                                                                                  |
|  |  | AZOBR_p1160052 |                                                                |                                                                                  |
|  |  | AZOBR_p1160053 |                                                                |                                                                                  |
|  |  | AZOBR_p1160055 |                                                                | 1: 0.00007, 3: 0.00010,                                                          |
|  |  | AZOBR_p1160056 |                                                                |                                                                                  |
|  |  | AZOBR_p1170004 | 4: 0.00047, 5: 0.00031,                                        | 1: 0.00022, 2: 0.00025,<br>3: 0.00056,                                           |
|  |  | AZOBR_p1170006 |                                                                | 2: 0.00008, 3: 0.00010,                                                          |
|  |  | AZOBR_p1170013 |                                                                |                                                                                  |
|  |  | AZOBR_p1170014 | 3: 0.00006, 5: 0.00007,                                        |                                                                                  |
|  |  | AZOBR_p1170018 | 3: 0.00004, 4: 0.00007,                                        | 2: 0.00009, 3: 0.00003,<br>1: 0.00033, 2: 0.00017,<br>3: 0.00082,                |
|  |  | AZOBR_p1170021 | 4: 0.00016, 5: 0.00016,<br>1: 0.00041, 2: 0.00082, 3: 0.00065, | 1: 0.00038, 2: 0.00054,<br>3: 0.00042,                                           |
|  |  | AZOBR_p1170023 | 4: 0.00088, 5: 0.00047,                                        |                                                                                  |
|  |  | AZOBR_p1170026 | 4: 0.00006,                                                    |                                                                                  |
|  |  | AZOBR_p1170027 |                                                                |                                                                                  |
|  |  | AZOBR_p1170029 |                                                                | 2: 0.00023, 3: 0.00020,                                                          |
|  |  | AZOBR_p1170034 | 2: 0.00079, 3: 0.00061, 4: 0.00086,<br>5: 0.00056,             | 1: 0.00046, 2: 0.00013,<br>3: 0.00061,<br>1: 0.00006, 2: 0.00019,<br>3: 0.00008, |
|  |  | AZOBR_p1170036 |                                                                |                                                                                  |
|  |  | AZOBR_p1170047 |                                                                |                                                                                  |
|  |  | AZOBR_p1170051 | 1: 0.00009,                                                    |                                                                                  |
|  |  | AZOBR_p1170056 |                                                                |                                                                                  |
|  |  | AZOBR_p1170057 |                                                                |                                                                                  |
|  |  | AZOBR_p1170058 |                                                                |                                                                                  |
|  |  | AZOBR_p1170059 |                                                                | 3: 0.00014,                                                                      |
|  |  | AZOBR_p1170066 |                                                                | 1: 0.00009, 3: 0.00009,                                                          |
|  |  | AZOBR_p1170069 |                                                                | 1: 0.00003, 3: 0.00008,<br>1: 0.00014, 2: 0.00027,<br>3: 0.00020,                |
|  |  | AZOBR_p1170073 | 4: 0.00025, 5: 0.00015,                                        |                                                                                  |
|  |  | AZOBR_p1170077 |                                                                |                                                                                  |
|  |  | AZOBR_p1170078 |                                                                | 3: 0.00013,                                                                      |
|  |  | AZOBR_p1170079 | 4: 0.00040, 5: 0.00028,                                        | 3: 0.00025,<br>1: 0.00080, 2: 0.00053,<br>3: 0.00104,                            |
|  |  | AZOBR_p1170080 |                                                                |                                                                                  |
|  |  | AZOBR_p1170081 |                                                                |                                                                                  |
|  |  | AZOBR_p1170084 |                                                                |                                                                                  |
|  |  | AZOBR_p1170085 | 1: 0.00200, 2: 0.00149, 3: 0.00288,<br>4: 0.00127, 5: 0.00154, | 1: 0.00089, 2: 0.00151,<br>3: 0.00086,                                           |
|  |  | AZOBR_p1170086 |                                                                |                                                                                  |
|  |  | AZOBR_p1170087 |                                                                |                                                                                  |
|  |  | AZOBR_p1170088 | 4: 0.00008, 5: 0.00008,                                        | 1: 0.00015, 3: 0.00040,                                                          |
|  |  | AZOBR_p1170089 | 1: 0.00019,                                                    | 1: 0.00012, 3: 0.00012,                                                          |
|  |  | AZOBR_p1170091 | 3: 0.00014, 4: 0.00008, 5: 0.00008,                            |                                                                                  |
|  |  | AZOBR_p1170092 | 1: 0.00087, 2: 0.00041, 3: 0.00089,<br>4: 0.00048, 5: 0.00024, | 1: 0.00015, 2: 0.00042,<br>3: 0.00014,<br>3: 0.00005,                            |
|  |  | AZOBR_p1170093 |                                                                |                                                                                  |
|  |  | AZOBR_p1170094 |                                                                |                                                                                  |
|  |  | AZOBR_p1180006 | 1: 0.00070, 2: 0.00099, 3: 0.00071,<br>4: 0.00144, 5: 0.00120, | 1: 0.00054, 2: 0.00071,<br>3: 0.00056,                                           |
|  |  | AZOBR_p1180007 |                                                                | 1: 0.00013,                                                                      |

|  |  |  |                |                                                                |                                                                                           |
|--|--|--|----------------|----------------------------------------------------------------|-------------------------------------------------------------------------------------------|
|  |  |  | AZOBR_p1180010 |                                                                | 3: 0.00005,                                                                               |
|  |  |  | AZOBR_p1180012 |                                                                |                                                                                           |
|  |  |  | AZOBR_p1180013 |                                                                |                                                                                           |
|  |  |  | AZOBR_p1180014 |                                                                | 1: 0.00003, 2: 0.00002,<br>3: 0.00002,                                                    |
|  |  |  | AZOBR_p1180016 | 3: 0.00018, 4: 0.00015, 5: 0.00015,                            | 1: 0.00021, 3: 0.00027,                                                                   |
|  |  |  | AZOBR_p1180019 | 1: 0.00278, 2: 0.00308, 3: 0.00223,<br>4: 0.00273, 5: 0.00334, | 1: 0.00325, 2: 0.00243,<br>3: 0.00251,                                                    |
|  |  |  | AZOBR_p1180022 | 4: 0.00018, 5: 0.00027,                                        | 1: 0.00126, 2: 0.00086,<br>3: 0.00081,                                                    |
|  |  |  | AZOBR_p1180025 |                                                                |                                                                                           |
|  |  |  | AZOBR_p1180027 | 1: 0.00017, 2: 0.00029, 3: 0.00026,<br>4: 0.00036, 5: 0.00023, | 1: 0.00044, 2: 0.00022,<br>3: 0.00029,                                                    |
|  |  |  | AZOBR_p1180028 |                                                                |                                                                                           |
|  |  |  | AZOBR_p1180029 | 4: 0.00009, 5: 0.00009,                                        | 3: 0.00008,                                                                               |
|  |  |  | AZOBR_p1180030 |                                                                |                                                                                           |
|  |  |  | AZOBR_p1180032 | 1: 0.00011, 3: 0.00007, 4: 0.00018,<br>5: 0.00010,             | 1: 0.00004, 2: 0.00006,<br>3: 0.00005,                                                    |
|  |  |  | AZOBR_p1180036 | 1: 0.00047, 2: 0.00095, 3: 0.00077,<br>4: 0.00112, 5: 0.00077, | 1: 0.00132, 2: 0.00106,<br>3: 0.00147,                                                    |
|  |  |  | AZOBR_p1180037 | 1: 0.00159, 2: 0.00099, 3: 0.00128,<br>4: 0.00116, 5: 0.00153, | 1: 0.00130, 2: 0.00164,<br>3: 0.00178,                                                    |
|  |  |  | AZOBR_p1180037 | 1: 0.00070, 2: 0.00062, 3: 0.00060,<br>4: 0.00076, 5: 0.00131, | 1: 0.00167, 2: 0.00197,<br>3: 0.00286,                                                    |
|  |  |  | AZOBR_p210002  | 2: 0.00005, 4: 0.00009, 5: 0.00007,                            | 1: 0.00008, 3: 0.00026,                                                                   |
|  |  |  | AZOBR_p210004  |                                                                |                                                                                           |
|  |  |  | AZOBR_p210005  |                                                                | 1: 0.00009,                                                                               |
|  |  |  | AZOBR_p210006  |                                                                |                                                                                           |
|  |  |  | AZOBR_p210007  |                                                                | 3: 0.00014,                                                                               |
|  |  |  | AZOBR_p210008  | 4: 0.00004,                                                    | 1: 0.00007, 3: 0.00010,<br>1: 0.00007, 2: 0.00006,<br>3: 0.00012,                         |
|  |  |  | AZOBR_p210009  |                                                                |                                                                                           |
|  |  |  | AZOBR_p210010  | 2: 0.00025, 3: 0.00024, 4: 0.00012,                            | 1: 0.00011, 2: 0.00024,<br>3: 0.00024,                                                    |
|  |  |  | AZOBR_p210012  |                                                                | 1: 0.00010, 3: 0.00023,<br>1: 0.00004, 2: 0.00006,<br>3: 0.00005,                         |
|  |  |  | AZOBR_p210013  |                                                                |                                                                                           |
|  |  |  | AZOBR_p210016  |                                                                | 2: 0.00008, 3: 0.00005,<br>1: 0.00017, 2: 0.00012, 3: 0.00020,<br>4: 0.00014, 5: 0.00005, |
|  |  |  | AZOBR_p210018  |                                                                | 1: 0.00061, 2: 0.00077,<br>3: 0.00061,                                                    |
|  |  |  | AZOBR_p210022  |                                                                |                                                                                           |
|  |  |  | AZOBR_p210024  | 1: 0.00029, 3: 0.00025, 4: 0.00010,                            | 1: 0.00022, 2: 0.00061,<br>3: 0.00021,                                                    |
|  |  |  | AZOBR_p210025  |                                                                |                                                                                           |
|  |  |  | AZOBR_p210027  | 4: 0.00006,                                                    | 3: 0.00005,                                                                               |
|  |  |  | AZOBR_p210050  |                                                                | 3: 0.00023,                                                                               |
|  |  |  | AZOBR_p210070  |                                                                |                                                                                           |
|  |  |  | AZOBR_p210091  | 1: 0.00007, 2: 0.00015, 3: 0.00012,<br>4: 0.00031, 5: 0.00031, | 1: 0.00004, 3: 0.00013,<br>1: 0.00015, 2: 0.00029,<br>3: 0.00020,                         |
|  |  |  | AZOBR_p210097  | 1: 0.00020, 2: 0.00014, 3: 0.00017,<br>4: 0.00025, 5: 0.00025, | 3: 0.00011,<br>1: 0.00007,                                                                |
|  |  |  | AZOBR_p210103  |                                                                |                                                                                           |
|  |  |  | AZOBR_p210104  |                                                                |                                                                                           |
|  |  |  | AZOBR_p210106  |                                                                | 1: 0.00021,                                                                               |
|  |  |  | AZOBR_p210107  |                                                                |                                                                                           |
|  |  |  | AZOBR_p210115  | 1: 0.00055, 2: 0.00059, 3: 0.00038,<br>4: 0.00069, 5: 0.00031, | 1: 0.00128, 3: 0.00096,<br>1: 0.00055, 2: 0.00049, 3: 0.00067,<br>4: 0.00043, 5: 0.00044, |
|  |  |  | AZOBR_p210116  |                                                                |                                                                                           |
|  |  |  | AZOBR_p210117  |                                                                |                                                                                           |
|  |  |  | AZOBR_p210122  |                                                                |                                                                                           |
|  |  |  | AZOBR_p210129  |                                                                | 1: 0.00008, 2: 0.00009,<br>3: 0.00013,                                                    |
|  |  |  | AZOBR_p210130  | 5: 0.00021,                                                    | 3: 0.00019,                                                                               |
|  |  |  | AZOBR_p210134  |                                                                |                                                                                           |
|  |  |  | AZOBR_p210135  |                                                                |                                                                                           |
|  |  |  | AZOBR_p210136  |                                                                | 1: 0.00118, 2: 0.00161,<br>3: 0.00135,                                                    |
|  |  |  | AZOBR_p210140  |                                                                |                                                                                           |
|  |  |  | AZOBR_p210148  | 1: 0.00032, 2: 0.00029, 3: 0.00035,<br>4: 0.00024, 5: 0.00022, |                                                                                           |
|  |  |  | AZOBR_p210167  |                                                                |                                                                                           |
|  |  |  | AZOBR_p210169  |                                                                | 1: 0.00012,                                                                               |
|  |  |  | AZOBR_p210180  |                                                                | 3: 0.00011,                                                                               |
|  |  |  | AZOBR_p210181  |                                                                |                                                                                           |
|  |  |  | AZOBR_p210182  |                                                                | 1: 0.00016, 2: 0.00010,<br>3: 0.00013,                                                    |
|  |  |  | AZOBR_p210185  |                                                                |                                                                                           |
|  |  |  | AZOBR_p210197  | 3: 0.00004, 4: 0.00003,                                        |                                                                                           |
|  |  |  | AZOBR_p220010  | 1: 0.00973, 2: 0.01282, 3: 0.00920,<br>4: 0.01117, 5: 0.01161, | 1: 0.01157, 2: 0.00821,<br>3: 0.01046,                                                    |
|  |  |  | AZOBR_p220011  | 1: 0.00161, 2: 0.00175, 3: 0.00137,<br>4: 0.00188, 5: 0.00197, | 1: 0.00072, 2: 0.00063,<br>3: 0.00116,                                                    |
|  |  |  | AZOBR_p220033  | 1: 0.00030, 2: 0.00011, 4: 0.00046,<br>5: 0.00042,             | 1: 0.00043, 2: 0.00053,<br>3: 0.00053,                                                    |
|  |  |  | AZOBR_p220034  |                                                                | 1: 0.00015,                                                                               |
|  |  |  | AZOBR_p220036  | 5: 0.00041,                                                    |                                                                                           |
|  |  |  | AZOBR_p220037  |                                                                |                                                                                           |
|  |  |  | AZOBR_p220038  | 4: 0.00001,                                                    | 3: 0.00001,                                                                               |

|  |  |               |                                                                |                                        |
|--|--|---------------|----------------------------------------------------------------|----------------------------------------|
|  |  | AZOBR_p220040 | 1: 0.00005, 4: 0.00003, 5: 0.00005,                            |                                        |
|  |  | AZOBR_p220043 |                                                                | 3: 0.00017,                            |
|  |  | AZOBR_p220044 |                                                                |                                        |
|  |  | AZOBR_p220049 | 5: 0.00006,                                                    | 3: 0.00006,                            |
|  |  | AZOBR_p220076 | 1: 0.00282, 2: 0.00231, 3: 0.00258,<br>4: 0.00295, 5: 0.00173, | 1: 0.00033, 2: 0.00038,<br>3: 0.00058, |
|  |  | AZOBR_p220077 |                                                                |                                        |
|  |  | AZOBR_p220082 | 1: 0.00235, 2: 0.00300, 3: 0.00265,<br>4: 0.00254, 5: 0.00314, |                                        |
|  |  | AZOBR_p220084 | 1: 0.00015, 2: 0.00013, 4: 0.00015,<br>5: 0.00013,             |                                        |
|  |  | AZOBR_p220087 | 1: 0.00011, 2: 0.00006, 3: 0.00009,<br>4: 0.00004,             | 2: 0.00005, 3: 0.00004,                |
|  |  | AZOBR_p220088 | 1: 0.00053, 2: 0.00047, 3: 0.00039,<br>4: 0.00068, 5: 0.00068, | 1: 0.00039, 2: 0.00033,<br>3: 0.00038, |
|  |  | AZOBR_p220089 |                                                                | 3: 0.00009,                            |
|  |  | AZOBR_p220094 |                                                                | 1: 0.00011, 2: 0.00008,<br>3: 0.00024, |
|  |  | AZOBR_p220099 |                                                                |                                        |
|  |  | AZOBR_p220101 |                                                                |                                        |
|  |  | AZOBR_p220102 | 3: 0.00013, 4: 0.00017, 5: 0.00010,                            | 3: 0.00015,                            |
|  |  | AZOBR_p220105 | 1: 0.00009, 3: 0.00011, 4: 0.00009,                            | 1: 0.00057, 2: 0.00064,<br>3: 0.00063, |
|  |  | AZOBR_p220106 |                                                                | 2: 0.00003,                            |
|  |  | AZOBR_p220110 | 2: 0.00009, 3: 0.00017, 4: 0.00020,<br>5: 0.00020,             | 1: 0.00009, 3: 0.00015,                |
|  |  | AZOBR_p220111 |                                                                |                                        |
|  |  | AZOBR_p220112 |                                                                |                                        |
|  |  | AZOBR_p220115 |                                                                | 2: 0.00013, 3: 0.00012,                |
|  |  | AZOBR_p230002 |                                                                |                                        |
|  |  | AZOBR_p230016 |                                                                |                                        |
|  |  | AZOBR_p230018 |                                                                |                                        |
|  |  | AZOBR_p230036 |                                                                |                                        |
|  |  | AZOBR_p230046 |                                                                | 3: 0.00009,                            |
|  |  | AZOBR_p230051 | 1: 0.00027, 2: 0.00024, 3: 0.00030,<br>4: 0.00015, 5: 0.00015, | 1: 0.00009, 2: 0.00039,<br>3: 0.00019, |
|  |  | AZOBR_p230063 |                                                                |                                        |
|  |  | AZOBR_p230066 |                                                                |                                        |
|  |  | AZOBR_p230087 | 1: 0.00159, 2: 0.00174, 3: 0.00174,<br>4: 0.00141, 5: 0.00068, | 1: 0.00063, 2: 0.00077,<br>3: 0.00052, |
|  |  | AZOBR_p230091 | 3: 0.00016,                                                    |                                        |
|  |  | AZOBR_p230092 | 1: 0.00035, 4: 0.00016,                                        | 2: 0.00026,                            |
|  |  | AZOBR_p230093 |                                                                |                                        |
|  |  | AZOBR_p230094 |                                                                |                                        |
|  |  | AZOBR_p250007 |                                                                |                                        |
|  |  | AZOBR_p250011 |                                                                |                                        |
|  |  | AZOBR_p270012 | 2: 0.00009, 3: 0.00021,                                        | 1: 0.00013, 2: 0.00022,<br>3: 0.00009, |
|  |  | AZOBR_p270033 |                                                                | 2: 0.00007,                            |
|  |  | AZOBR_p270039 |                                                                |                                        |
|  |  | AZOBR_p270057 | 5: 0.00004,                                                    | 1: 0.00003, 3: 0.00008,                |
|  |  | AZOBR_p270059 | 1: 0.00010, 3: 0.00004, 4: 0.00023,<br>5: 0.00009,             | 1: 0.00026, 2: 0.00022,<br>3: 0.00033, |
|  |  | AZOBR_p270061 |                                                                |                                        |
|  |  | AZOBR_p270080 |                                                                |                                        |
|  |  | AZOBR_p270113 | 3: 0.00007,                                                    |                                        |
|  |  | AZOBR_p270126 |                                                                |                                        |
|  |  | AZOBR_p270130 | 3: 0.00005,                                                    |                                        |
|  |  | AZOBR_p270132 | 1: 0.00076, 2: 0.00052, 3: 0.00072,<br>4: 0.00018, 5: 0.00035, | 1: 0.00044, 2: 0.00043,<br>3: 0.00058, |
|  |  | AZOBR_p270133 | 2: 0.00004, 4: 0.00003, 5: 0.00002,                            | 1: 0.00003, 2: 0.00003,<br>3: 0.00006, |
|  |  | AZOBR_p270135 |                                                                |                                        |
|  |  | AZOBR_p270144 |                                                                |                                        |
|  |  | AZOBR_p270147 |                                                                | 1: 0.00019, 2: 0.00005,<br>3: 0.00012, |
|  |  | AZOBR_p270149 |                                                                | 1: 0.00007, 2: 0.00002,<br>3: 0.00005, |
|  |  | AZOBR_p270150 |                                                                |                                        |
|  |  | AZOBR_p270151 |                                                                | 1: 0.00010, 3: 0.00017,                |
|  |  | AZOBR_p270152 |                                                                |                                        |
|  |  | AZOBR_p270154 |                                                                |                                        |
|  |  | AZOBR_p270158 | 5: 0.00014,                                                    |                                        |
|  |  | AZOBR_p270160 |                                                                | 3: 0.00006,                            |
|  |  | AZOBR_p270161 |                                                                |                                        |
|  |  | AZOBR_p270162 |                                                                |                                        |
|  |  | AZOBR_p270171 | 1: 0.00020, 4: 0.00009,                                        | 1: 0.00017, 2: 0.00015,<br>3: 0.00033, |
|  |  | AZOBR_p270174 |                                                                |                                        |
|  |  | AZOBR_p270177 | 4: 0.00004,                                                    |                                        |
|  |  | AZOBR_p270187 |                                                                | 1: 0.00016, 2: 0.00007,<br>3: 0.00031, |
|  |  | AZOBR_p270203 |                                                                | 1: 0.00002,                            |
|  |  | AZOBR_p270222 |                                                                | 1: 0.00008, 3: 0.00016,                |
|  |  | AZOBR_p270223 |                                                                | 2: 0.00009,                            |
|  |  | AZOBR_p270224 |                                                                | 2: 0.00021, 3: 0.00014,                |
|  |  | AZOBR_p270225 |                                                                |                                        |
|  |  | AZOBR_p270229 | 1: 0.00011,                                                    |                                        |

|  |  |               |                                                                                                       |                                                                                  |
|--|--|---------------|-------------------------------------------------------------------------------------------------------|----------------------------------------------------------------------------------|
|  |  | AZOBR_p270230 | 1: 0.00011, 4: 0.00016, 5: 0.00012,                                                                   | 1: 0.00015, 3: 0.00014,                                                          |
|  |  | AZOBR_p270232 |                                                                                                       |                                                                                  |
|  |  | AZOBR_p270244 |                                                                                                       | 1: 0.00020, 2: 0.00016,<br>3: 0.00043,                                           |
|  |  | AZOBR_p270247 | 3: 0.00011, 5: 0.00015,                                                                               | 1: 0.00023, 2: 0.00029,<br>3: 0.00058,                                           |
|  |  | AZOBR_p270279 |                                                                                                       | 3: 0.00019,                                                                      |
|  |  | AZOBR_p270280 | 3: 0.00005, 4: 0.00011, 5: 0.00009,<br>1: 0.00549, 2: 0.00318, 3: 0.00392,<br>4: 0.00447, 5: 0.00427, | 1: 0.00009, 2: 0.00012,<br>3: 0.00015,<br>1: 0.00318, 2: 0.00279,<br>3: 0.00359, |
|  |  | AZOBR_p280010 |                                                                                                       | 1: 0.00029, 2: 0.00059,<br>3: 0.00039,                                           |
|  |  | AZOBR_p280013 |                                                                                                       | 3: 0.00010,                                                                      |
|  |  | AZOBR_p280015 | 4: 0.00014, 5: 0.00007,                                                                               | 1: 0.00014, 2: 0.00006,<br>3: 0.00013,                                           |
|  |  | AZOBR_p280016 | 4: 0.00006,                                                                                           |                                                                                  |
|  |  | AZOBR_p280017 | 2: 0.00049, 3: 0.00059,                                                                               |                                                                                  |
|  |  | AZOBR_p280024 | 1: 0.00044, 2: 0.00020, 3: 0.00025,<br>4: 0.00026, 5: 0.00036,                                        | 1: 0.00009, 2: 0.00049,<br>1: 0.00008, 3: 0.00009,                               |
|  |  | AZOBR_p280026 | 4: 0.00004,                                                                                           | 1: 0.00011, 2: 0.00013,<br>3: 0.00016,                                           |
|  |  | AZOBR_p280027 | 2: 0.00054, 3: 0.00022, 5: 0.00012,                                                                   |                                                                                  |
|  |  | AZOBR_p280028 |                                                                                                       |                                                                                  |
|  |  | AZOBR_p280029 |                                                                                                       | 3: 0.00007,                                                                      |
|  |  | AZOBR_p280033 | 1: 0.00632, 2: 0.00499, 3: 0.00538,<br>4: 0.00484, 5: 0.00376,                                        | 1: 0.00709, 2: 0.00697,<br>3: 0.00422,                                           |
|  |  | AZOBR_p280034 | 1: 0.00115, 2: 0.00109, 3: 0.00070,<br>4: 0.00152, 5: 0.00136,                                        | 1: 0.00047, 2: 0.00066,<br>3: 0.00066,                                           |
|  |  | AZOBR_p280035 |                                                                                                       |                                                                                  |
|  |  | AZOBR_p280036 | 1: 0.00033, 2: 0.00046, 3: 0.00073,<br>4: 0.00021, 5: 0.00026,                                        | 2: 0.00005, 3: 0.00016,<br>1: 0.00024, 2: 0.00011,<br>3: 0.00023,                |
|  |  | AZOBR_p280039 | 4: 0.00010, 5: 0.00015,                                                                               |                                                                                  |
|  |  | AZOBR_p280040 |                                                                                                       |                                                                                  |
|  |  | AZOBR_p280043 | 1: 0.00057, 2: 0.00028, 3: 0.00070,<br>4: 0.00031, 5: 0.00022,                                        | 2: 0.00023,                                                                      |
|  |  | AZOBR_p280048 |                                                                                                       |                                                                                  |
|  |  | AZOBR_p280052 |                                                                                                       |                                                                                  |
|  |  | AZOBR_p280056 | 4: 0.00020, 5: 0.00051,                                                                               | 1: 0.00028, 3: 0.00037,<br>1: 0.00076, 2: 0.00026,<br>3: 0.00095,                |
|  |  | AZOBR_p280064 | 1: 0.00024, 2: 0.00021, 3: 0.00040,<br>4: 0.00049, 5: 0.00057,                                        | 1: 0.00007,                                                                      |
|  |  | AZOBR_p280067 |                                                                                                       | 1: 0.00009, 2: 0.00010,<br>3: 0.00013,                                           |
|  |  | AZOBR_p280071 | 4: 0.00009, 5: 0.00028,                                                                               |                                                                                  |
|  |  | AZOBR_p280077 |                                                                                                       |                                                                                  |
|  |  | AZOBR_p280093 |                                                                                                       | 1: 0.00011, 2: 0.00009,<br>3: 0.00031,                                           |
|  |  | AZOBR_p280099 | 2: 0.00009, 4: 0.00018, 5: 0.00016,                                                                   | 2: 0.00005, 3: 0.00008,                                                          |
|  |  | AZOBR_p280100 | 4: 0.00014, 5: 0.00007,                                                                               |                                                                                  |
|  |  | AZOBR_p280103 | 4: 0.00022,                                                                                           | 1: 0.00028, 3: 0.00033,                                                          |
|  |  | AZOBR_p280105 | 1: 0.00010, 2: 0.00007, 3: 0.00011,<br>4: 0.00019, 5: 0.00012,                                        | 1: 0.00013, 2: 0.00004,<br>3: 0.00014,                                           |
|  |  | AZOBR_p280106 |                                                                                                       | 1: 0.00025,                                                                      |
|  |  | AZOBR_p280107 |                                                                                                       | 3: 0.00003,                                                                      |
|  |  | AZOBR_p280112 |                                                                                                       |                                                                                  |
|  |  | AZOBR_p280114 |                                                                                                       |                                                                                  |
|  |  | AZOBR_p280115 |                                                                                                       |                                                                                  |
|  |  | AZOBR_p280116 |                                                                                                       | 3: 0.00008,                                                                      |
|  |  | AZOBR_p280118 | 4: 0.00009,                                                                                           | 3: 0.00005,                                                                      |
|  |  | AZOBR_p280120 |                                                                                                       |                                                                                  |
|  |  | AZOBR_p280122 | 1: 0.00044, 2: 0.00023, 3: 0.00030,<br>4: 0.00091, 5: 0.00061,                                        | 1: 0.00079, 2: 0.00058,<br>3: 0.00098,                                           |
|  |  | AZOBR_p280124 |                                                                                                       |                                                                                  |
|  |  | AZOBR_p280126 |                                                                                                       | 2: 0.00009, 3: 0.00015,                                                          |
|  |  | AZOBR_p280132 |                                                                                                       |                                                                                  |
|  |  | AZOBR_p280133 |                                                                                                       |                                                                                  |
|  |  | AZOBR_p280137 | 1: 0.00169, 2: 0.00190, 3: 0.00167,<br>4: 0.00064, 5: 0.00155,                                        | 1: 0.00090, 2: 0.00150,<br>3: 0.00111,                                           |
|  |  | AZOBR_p280141 | 2: 0.00008, 4: 0.00007, 5: 0.00007,                                                                   | 1: 0.00015, 2: 0.00010,<br>3: 0.00012,<br>1: 0.00026, 2: 0.00029,<br>3: 0.00032, |
|  |  | AZOBR_p280144 | 3: 0.00015, 4: 0.00016, 5: 0.00016,                                                                   |                                                                                  |
|  |  | AZOBR_p310004 |                                                                                                       |                                                                                  |
|  |  | AZOBR_p310028 |                                                                                                       | 3: 0.00004,                                                                      |
|  |  | AZOBR_p310044 | 3: 0.00007,                                                                                           |                                                                                  |
|  |  | AZOBR_p310057 | 4: 0.00005,                                                                                           |                                                                                  |
|  |  | AZOBR_p310071 | 5: 0.00008,                                                                                           | 1: 0.00012, 3: 0.00007,                                                          |
|  |  | AZOBR_p310073 | 2: 0.00007, 3: 0.00007, 4: 0.00009,                                                                   |                                                                                  |
|  |  | AZOBR_p310075 | 1: 0.00136, 2: 0.00053, 3: 0.00065,<br>4: 0.00045, 5: 0.00026,                                        | 1: 0.00063, 2: 0.00087,<br>3: 0.00041,                                           |
|  |  | AZOBR_p310089 |                                                                                                       |                                                                                  |
|  |  | AZOBR_p310110 |                                                                                                       | 2: 0.00006,                                                                      |
|  |  | AZOBR_p310123 |                                                                                                       |                                                                                  |
|  |  | AZOBR_p310127 | 4: 0.00006, 5: 0.00006,                                                                               | 2: 0.00006, 3: 0.00005,                                                          |
|  |  | AZOBR_p310134 |                                                                                                       |                                                                                  |
|  |  | AZOBR_p310137 | 3: 0.00008,                                                                                           |                                                                                  |
|  |  | AZOBR_p310141 | 1: 0.00008,                                                                                           |                                                                                  |
|  |  | AZOBR_p310162 |                                                                                                       |                                                                                  |
|  |  | AZOBR_p310167 | 1: 0.00107, 2: 0.00120, 3: 0.00112,                                                                   | 1: 0.00050, 2: 0.00033,                                                          |

|  |  |  |               |                                     |                         |
|--|--|--|---------------|-------------------------------------|-------------------------|
|  |  |  |               | 4: 0.00090, 5: 0.00076,             | 3: 0.00084,             |
|  |  |  | AZOBR_p310169 | 3: 0.00014,                         |                         |
|  |  |  | AZOBR_p310174 |                                     | 1: 0.00019, 2: 0.00019, |
|  |  |  | AZOBR_p310177 | 5: 0.00013,                         | 3: 0.00014,             |
|  |  |  | AZOBR_p310187 |                                     |                         |
|  |  |  | AZOBR_p310190 |                                     |                         |
|  |  |  | AZOBR_p310197 |                                     | 1: 0.00021, 2: 0.00013, |
|  |  |  | AZOBR_p310203 |                                     | 3: 0.00018,             |
|  |  |  | AZOBR_p310205 | 4: 0.00090, 5: 0.00030,             |                         |
|  |  |  | AZOBR_p310206 | 1: 0.00091, 2: 0.00080, 3: 0.00086, | 1: 0.00058, 2: 0.00066, |
|  |  |  | AZOBR_p310211 | 4: 0.00229, 5: 0.00195,             | 3: 0.00157,             |
|  |  |  | AZOBR_p310213 |                                     |                         |
|  |  |  | AZOBR_p310214 |                                     | 1: 0.00007, 3: 0.00014, |
|  |  |  | AZOBR_p310215 |                                     | 1: 0.00037, 2: 0.00037, |
|  |  |  | AZOBR_p310232 |                                     | 3: 0.00045,             |
|  |  |  | AZOBR_p310251 | 1: 0.00009,                         | 1: 0.00014, 2: 0.00010, |
|  |  |  | AZOBR_p310255 |                                     | 3: 0.00022,             |
|  |  |  | AZOBR_p310257 |                                     | 1: 0.00062, 3: 0.00038, |
|  |  |  | AZOBR_p310258 |                                     | 1: 0.00024,             |
|  |  |  | AZOBR_p310259 |                                     | 1: 0.00008, 3: 0.00008, |
|  |  |  | AZOBR_p310260 |                                     |                         |
|  |  |  | AZOBR_p310267 | 1: 0.00034, 2: 0.00011, 3: 0.00033, | 1: 0.00027, 2: 0.00056, |
|  |  |  | AZOBR_p310268 | 4: 0.00044, 5: 0.00026,             | 3: 0.00048,             |
|  |  |  | AZOBR_p310271 | 2: 0.00025,                         |                         |
|  |  |  | AZOBR_p310277 |                                     | 2: 0.00010,             |
|  |  |  | AZOBR_p310279 |                                     |                         |
|  |  |  | AZOBR_p310336 | 2: 0.00010,                         |                         |
|  |  |  | AZOBR_p330015 |                                     | 2: 0.00006,             |
|  |  |  | AZOBR_p330020 |                                     | 2: 0.00003,             |
|  |  |  | AZOBR_p330026 |                                     | 2: 0.00010, 3: 0.00008, |
|  |  |  | AZOBR_p330032 |                                     |                         |
|  |  |  | AZOBR_p330044 |                                     |                         |
|  |  |  | AZOBR_p330047 |                                     |                         |
|  |  |  | AZOBR_p330048 |                                     |                         |
|  |  |  | AZOBR_p330049 |                                     |                         |
|  |  |  | AZOBR_p330050 |                                     | 1: 0.00007, 2: 0.00006, |
|  |  |  | AZOBR_p330053 |                                     | 3: 0.00008,             |
|  |  |  | AZOBR_p330060 |                                     | 3: 0.00005,             |
|  |  |  | AZOBR_p330069 |                                     | 3: 0.00008,             |
|  |  |  | AZOBR_p330074 |                                     | 1: 0.00024, 3: 0.00010, |
|  |  |  | AZOBR_p330076 | 4: 0.00009,                         | 1: 0.00006, 2: 0.00007, |
|  |  |  | AZOBR_p330080 |                                     | 3: 0.00014,             |
|  |  |  | AZOBR_p330082 |                                     | 2: 0.00005,             |
|  |  |  | AZOBR_p330087 |                                     | 1: 0.00018, 3: 0.00009, |
|  |  |  | AZOBR_p330089 |                                     | 2: 0.00027, 3: 0.00023, |
|  |  |  | AZOBR_p330094 |                                     | 2: 0.00011, 3: 0.00009, |
|  |  |  | AZOBR_p330126 |                                     | 1: 0.00062, 2: 0.00030, |
|  |  |  | AZOBR_p330143 |                                     | 3: 0.00071,             |
|  |  |  | AZOBR_p330151 |                                     |                         |
|  |  |  | AZOBR_p330152 | 4: 0.00040, 5: 0.00013,             |                         |
|  |  |  | AZOBR_p330155 | 1: 0.00017, 3: 0.00029, 4: 0.00018, |                         |
|  |  |  | AZOBR_p330159 | 4: 0.00025,                         | 1: 0.00069, 2: 0.00017, |
|  |  |  | AZOBR_p340002 | 2: 0.00009, 3: 0.00017,             | 3: 0.00133,             |
|  |  |  | AZOBR_p340004 | 1: 0.00020, 2: 0.00028, 3: 0.00046, | 1: 0.00057, 2: 0.00067, |
|  |  |  | AZOBR_p340005 | 4: 0.00051, 5: 0.00042,             | 3: 0.00063,             |
|  |  |  | AZOBR_p340006 |                                     |                         |
|  |  |  | AZOBR_p340008 | 1: 0.00004,                         |                         |
|  |  |  | AZOBR_p340061 |                                     |                         |
|  |  |  | AZOBR_p340062 |                                     | 1: 0.00006,             |
|  |  |  | AZOBR_p340072 |                                     |                         |
|  |  |  | AZOBR_p340099 |                                     | 1: 0.00019, 3: 0.00012, |
|  |  |  | AZOBR_p340166 | 1: 0.00025, 4: 0.00028, 5: 0.00011, | 3: 0.00021,             |
|  |  |  | AZOBR_p340169 |                                     | 3: 0.00010,             |
|  |  |  | AZOBR_p340215 |                                     |                         |
|  |  |  | AZOBR_p340220 |                                     |                         |
|  |  |  | AZOBR_p340221 |                                     |                         |
|  |  |  | AZOBR_p340221 |                                     |                         |
|  |  |  | AZOBR_p350001 | 1: 0.00030, 3: 0.00025, 4: 0.00031, | 1: 0.00022, 2: 0.00011, |
|  |  |  | AZOBR_p350036 | 5: 0.00041,                         | 3: 0.00037,             |
|  |  |  | AZOBR_p350058 | 4: 0.00007, 5: 0.00019,             |                         |
|  |  |  | AZOBR_p350059 | 4: 0.00014, 5: 0.00011,             | 2: 0.00011, 3: 0.00010, |
|  |  |  | AZOBR_p350061 | 5: 0.00006,                         |                         |
|  |  |  | AZOBR_p350063 |                                     |                         |
|  |  |  | AZOBR_p350063 | 1: 0.00031, 2: 0.00037, 3: 0.00027, |                         |
|  |  |  | AZOBR_p350084 | 1: 0.00024, 4: 0.00012, 5: 0.00016, |                         |
|  |  |  | AZOBR_p350085 |                                     |                         |
|  |  |  | AZOBR_p410001 |                                     |                         |

|  |  |  |               |                                                                |                                        |
|--|--|--|---------------|----------------------------------------------------------------|----------------------------------------|
|  |  |  | AZOBR_p410006 |                                                                |                                        |
|  |  |  | AZOBR_p410007 |                                                                | 3: 0.00005,                            |
|  |  |  | AZOBR_p410021 | 1: 0.00390, 2: 0.00290, 3: 0.00288,<br>4: 0.00214, 5: 0.00191, | 1: 0.00205, 2: 0.00267,<br>3: 0.00196, |
|  |  |  | AZOBR_p410022 | 1: 0.00105, 2: 0.00221, 3: 0.00159,<br>4: 0.00157, 5: 0.00177, | 1: 0.00198, 2: 0.00183,<br>3: 0.00156, |
|  |  |  | AZOBR_p410029 |                                                                | 3: 0.00005,                            |
|  |  |  | AZOBR_p410040 | 1: 0.00011, 4: 0.00013, 5: 0.00005,                            | 3: 0.00005,                            |
|  |  |  | AZOBR_p410042 |                                                                |                                        |
|  |  |  | AZOBR_p410049 |                                                                | 2: 0.00015,                            |
|  |  |  | AZOBR_p410063 |                                                                |                                        |
|  |  |  | AZOBR_p410074 | 3: 0.00021, 4: 0.00022,                                        | 2: 0.00012, 3: 0.00010,                |
|  |  |  | AZOBR_p410076 |                                                                | 2: 0.00006, 3: 0.00007,                |
|  |  |  | AZOBR_p410085 | 4: 0.00009,                                                    | 1: 0.00017, 2: 0.00015,<br>3: 0.00008, |
|  |  |  | AZOBR_p410086 | 1: 0.00006, 2: 0.00010, 3: 0.00007,<br>4: 0.00008, 5: 0.00010, | 3: 0.00004,                            |
|  |  |  | AZOBR_p410087 | 4: 0.00013, 5: 0.00020,                                        |                                        |
|  |  |  | AZOBR_p410090 |                                                                | 1: 0.00069, 3: 0.00067,                |
|  |  |  | AZOBR_p410091 |                                                                |                                        |
|  |  |  | AZOBR_p410098 | 1: 0.00029, 2: 0.00051, 3: 0.00073,<br>4: 0.00010,             | 1: 0.00032, 3: 0.00022,                |
|  |  |  | AZOBR_p410099 | 1: 0.00068, 2: 0.00060, 3: 0.00116,<br>4: 0.00084, 5: 0.00103, | 1: 0.00183, 2: 0.00138,<br>3: 0.00169, |
|  |  |  | AZOBR_p410100 | 1: 0.00025, 2: 0.00015, 3: 0.00025,<br>4: 0.00012, 5: 0.00017, | 1: 0.00013, 2: 0.00015,<br>3: 0.00029, |
|  |  |  | AZOBR_p410101 | 3: 0.00037,                                                    | 1: 0.00056, 2: 0.00079,                |
|  |  |  | AZOBR_p410103 |                                                                |                                        |
|  |  |  | AZOBR_p420001 | 1: 0.00005, 4: 0.00003,                                        |                                        |
|  |  |  | AZOBR_p420006 |                                                                | 3: 0.00017,                            |
|  |  |  | AZOBR_p420012 |                                                                |                                        |
|  |  |  | AZOBR_p420020 | 3: 0.00016, 4: 0.00010,                                        | 3: 0.00007,                            |
|  |  |  | AZOBR_p420023 |                                                                | 3: 0.00005,                            |
|  |  |  | AZOBR_p420024 | 1: 0.00297, 2: 0.00404, 3: 0.00305,<br>4: 0.00212, 5: 0.00337, | 1: 0.00403, 2: 0.00348,<br>3: 0.00318, |
|  |  |  | AZOBR_p420025 | 1: 0.00006,                                                    | 1: 0.00004, 2: 0.00004,<br>3: 0.00004, |
|  |  |  | AZOBR_p430003 | 1: 0.00003, 3: 0.00003, 4: 0.00002,<br>5: 0.00002,             | 1: 0.00003, 2: 0.00004,<br>3: 0.00007, |
|  |  |  | AZOBR_p430004 |                                                                |                                        |
|  |  |  | AZOBR_p430005 | 3: 0.00024, 4: 0.00040,                                        | 3: 0.00027,                            |
|  |  |  | AZOBR_p430006 | 1: 0.00014, 2: 0.00013, 3: 0.00013,<br>4: 0.00004, 5: 0.00005, | 1: 0.00004, 2: 0.00008,<br>3: 0.00004, |
|  |  |  | AZOBR_p430008 |                                                                | 1: 0.00004,                            |
|  |  |  | AZOBR_p430009 |                                                                | 1: 0.00002,                            |
|  |  |  | AZOBR_p430010 |                                                                |                                        |
|  |  |  | AZOBR_p430031 | 4: 0.00004,                                                    |                                        |
|  |  |  | AZOBR_p430035 | 1: 0.00016, 3: 0.00019, 4: 0.00009,                            | 1: 0.00010, 2: 0.00019,<br>3: 0.00020, |
|  |  |  | AZOBR_p430038 | 2: 0.00017, 4: 0.00013,                                        | 1: 0.00008,                            |
|  |  |  | AZOBR_p430039 | 1: 0.00041, 3: 0.00028, 4: 0.00011,                            |                                        |
|  |  |  | AZOBR_p430041 |                                                                |                                        |
|  |  |  | AZOBR_p430046 | 1: 0.00006,                                                    | 1: 0.00009, 2: 0.00011,<br>3: 0.00007, |
|  |  |  | AZOBR_p430050 |                                                                |                                        |
|  |  |  | AZOBR_p430053 | 1: 0.00098, 2: 0.00096, 3: 0.00139,<br>4: 0.00105, 5: 0.00113, | 1: 0.00133, 2: 0.00183,<br>3: 0.00115, |
|  |  |  | AZOBR_p430054 |                                                                |                                        |
|  |  |  | AZOBR_p430056 | 4: 0.00027,                                                    |                                        |
|  |  |  | AZOBR_p430058 | 1: 0.00031, 2: 0.00022, 3: 0.00032,<br>4: 0.00013, 5: 0.00017, | 1: 0.00016, 2: 0.00018,<br>3: 0.00023, |
|  |  |  | AZOBR_p430060 |                                                                | 3: 0.00007,                            |
|  |  |  | AZOBR_p430062 | 1: 0.00014, 2: 0.00038, 3: 0.00026,<br>4: 0.00046, 5: 0.00036, | 1: 0.00069, 2: 0.00082,<br>3: 0.00085, |
|  |  |  | AZOBR_p430065 | 4: 0.00053,                                                    | 1: 0.00033, 2: 0.00037,<br>3: 0.00032, |
|  |  |  | AZOBR_p440007 |                                                                | 3: 0.00007,                            |
|  |  |  | AZOBR_p440013 |                                                                |                                        |
|  |  |  | AZOBR_p440014 | 1: 0.00053, 2: 0.00071, 3: 0.00041,<br>4: 0.00040, 5: 0.00059, | 1: 0.00130, 2: 0.00082,<br>3: 0.00106, |
|  |  |  | AZOBR_p440018 | 1: 0.00431, 2: 0.00528, 3: 0.00455,<br>4: 0.00330, 5: 0.00435, | 1: 0.00925, 2: 0.00814,<br>3: 0.00699, |
|  |  |  | AZOBR_p440019 | 1: 0.00151, 2: 0.00203, 3: 0.00160,<br>4: 0.00146, 5: 0.00159, | 1: 0.00701, 2: 0.01026,<br>3: 0.00530, |
|  |  |  | AZOBR_p440026 | 1: 0.00218, 2: 0.00144, 3: 0.00149,<br>4: 0.00137, 5: 0.00153, | 1: 0.00089, 2: 0.00078,<br>3: 0.00099, |
|  |  |  | AZOBR_p440030 |                                                                | 2: 0.00003,                            |
|  |  |  | AZOBR_p440033 |                                                                |                                        |
|  |  |  | AZOBR_p440034 | 1: 0.00005, 2: 0.00008, 3: 0.00005,<br>4: 0.00005, 5: 0.00005, | 1: 0.00003, 2: 0.00003,<br>3: 0.00011, |
|  |  |  | AZOBR_p440042 | 3: 0.00011,                                                    |                                        |
|  |  |  | AZOBR_p440043 |                                                                | 3: 0.00030,                            |
|  |  |  | AZOBR_p440053 |                                                                | 3: 0.00015,                            |
|  |  |  | AZOBR_p440054 |                                                                | 3: 0.00009,                            |
|  |  |  | AZOBR_p440060 |                                                                | 1: 0.00017, 2: 0.00028,<br>3: 0.00010, |
|  |  |  | AZOBR_p440062 | 3: 0.00008,                                                    |                                        |
|  |  |  | AZOBR_p440063 |                                                                |                                        |
|  |  |  | AZOBR_p440069 |                                                                |                                        |

|  |  |  |               |                                                             |                                     |
|--|--|--|---------------|-------------------------------------------------------------|-------------------------------------|
|  |  |  | AZOBR_p440070 |                                                             | 1: 0.00009, 2: 0.00010, 3: 0.00006, |
|  |  |  | AZOBR_p440071 |                                                             | 2: 0.00013,                         |
|  |  |  | AZOBR_p440072 |                                                             |                                     |
|  |  |  | AZOBR_p440073 |                                                             |                                     |
|  |  |  | AZOBR_p440083 | 1: 0.00182, 2: 0.00118, 3: 0.00110, 4: 0.00100, 5: 0.00103, | 1: 0.00109, 2: 0.00100, 3: 0.00060, |
|  |  |  | AZOBR_p440088 | 2: 0.00006, 4: 0.00007, 5: 0.00012,                         | 1: 0.00011, 2: 0.00005, 3: 0.00019, |
|  |  |  | AZOBR_p440089 | 1: 0.00005,                                                 | 2: 0.00004, 3: 0.00005,             |
|  |  |  | AZOBR_p440091 |                                                             |                                     |
|  |  |  | AZOBR_p440094 | 1: 0.00015, 4: 0.00015, 5: 0.00015,                         | 1: 0.00023, 2: 0.00016, 3: 0.00036, |
|  |  |  | AZOBR_p440095 | 1: 0.00024, 2: 0.00032, 3: 0.00010, 4: 0.00059, 5: 0.00042, | 1: 0.00067, 2: 0.00054, 3: 0.00099, |
|  |  |  | AZOBR_p440099 | 2: 0.00007, 3: 0.00005, 4: 0.00021, 5: 0.00028,             | 1: 0.00050, 2: 0.00030, 3: 0.00064, |
|  |  |  | AZOBR_p440101 | 1: 0.00074, 2: 0.00049, 3: 0.00031, 4: 0.00083, 5: 0.00128, | 1: 0.00095, 2: 0.00108, 3: 0.00149, |
|  |  |  | AZOBR_p440102 |                                                             | 3: 0.00012,                         |
|  |  |  | AZOBR_p440103 | 1: 0.00028, 2: 0.00025, 3: 0.00034, 4: 0.00020, 5: 0.00012, | 1: 0.00011, 2: 0.00008, 3: 0.00011, |
|  |  |  | AZOBR_p440104 | 2: 0.00037, 3: 0.00072, 4: 0.00029, 5: 0.00058,             | 2: 0.00046, 3: 0.00052,             |
|  |  |  | AZOBR_p440105 |                                                             |                                     |
|  |  |  | AZOBR_p440108 | 3: 0.00049,                                                 |                                     |
|  |  |  | AZOBR_p440110 |                                                             |                                     |
|  |  |  | AZOBR_p440112 | 1: 0.00027, 2: 0.00019, 3: 0.00015, 4: 0.00027, 5: 0.00015, | 1: 0.00004, 2: 0.00009, 3: 0.00009, |
|  |  |  | AZOBR_p440113 |                                                             | 1: 0.00046, 2: 0.00040, 3: 0.00051, |
|  |  |  | AZOBR_p440118 | 4: 0.00005,                                                 |                                     |
|  |  |  | AZOBR_p440120 |                                                             | 1: 0.00007, 2: 0.00008, 3: 0.00007, |
|  |  |  | AZOBR_p440122 |                                                             |                                     |
|  |  |  | AZOBR_p440124 |                                                             |                                     |
|  |  |  | AZOBR_p440127 |                                                             | 2: 0.00010,                         |
|  |  |  | AZOBR_p440128 | 1: 0.00035, 2: 0.00106, 3: 0.00073, 4: 0.00104, 5: 0.00111, | 1: 0.00087, 2: 0.00084, 3: 0.00094, |
|  |  |  | AZOBR_p440132 | 4: 0.00016, 5: 0.00008,                                     | 1: 0.00027, 2: 0.00039, 3: 0.00028, |
|  |  |  | AZOBR_p440139 | 1: 0.00057, 2: 0.00031, 3: 0.00037, 4: 0.00039, 5: 0.00015, | 1: 0.00017, 2: 0.00019, 3: 0.00011, |
|  |  |  | AZOBR_p440141 | 1: 0.00049, 2: 0.00034, 3: 0.00048, 4: 0.00045, 5: 0.00037, | 1: 0.00058, 2: 0.00062, 3: 0.00080, |
|  |  |  | AZOBR_p440144 |                                                             | 1: 0.00025, 2: 0.00035, 3: 0.00048, |
|  |  |  | AZOBR_p440146 |                                                             |                                     |
|  |  |  | AZOBR_p440148 | 2: 0.00007,                                                 |                                     |
|  |  |  | AZOBR_p440149 | 3: 0.00019, 4: 0.00024,                                     |                                     |
|  |  |  | AZOBR_p440152 | 1: 0.00084, 2: 0.00078, 3: 0.00072, 4: 0.00051, 5: 0.00087, | 1: 0.00015, 2: 0.00024, 3: 0.00041, |
|  |  |  | AZOBR_p440153 | 1: 0.00429, 2: 0.00448, 3: 0.00274, 4: 0.00227, 5: 0.00286, | 1: 0.00362, 2: 0.00312, 3: 0.00222, |
|  |  |  | AZOBR_p440154 | 2: 0.00013, 3: 0.00032, 4: 0.00026, 5: 0.00016,             | 1: 0.00015, 2: 0.00022, 3: 0.00024, |
|  |  |  | AZOBR_p440158 |                                                             | 1: 0.00049, 2: 0.00059, 3: 0.00070, |
|  |  |  | AZOBR_p440163 |                                                             | 1: 0.00036, 2: 0.00032, 3: 0.00038, |
|  |  |  | AZOBR_p440175 |                                                             | 2: 0.00005, 3: 0.00004,             |
|  |  |  | AZOBR_p440178 | 4: 0.00005,                                                 | 3: 0.00005,                         |
|  |  |  | AZOBR_p440179 |                                                             |                                     |
|  |  |  | AZOBR_p440180 | 1: 0.00010, 2: 0.00009, 4: 0.00007,                         | 3: 0.00013,                         |
|  |  |  | AZOBR_p440187 | 1: 0.00015, 2: 0.00007, 3: 0.00016, 4: 0.00028, 5: 0.00018, | 1: 0.00017, 2: 0.00011, 3: 0.00033, |
|  |  |  | AZOBR_p450004 | 1: 0.00011, 3: 0.00012, 4: 0.00015,                         |                                     |
|  |  |  | AZOBR_p450005 |                                                             |                                     |
|  |  |  | AZOBR_p450012 | 1: 0.00009, 3: 0.00015, 4: 0.00009, 5: 0.00006,             | 1: 0.00020, 2: 0.00019, 3: 0.00036, |
|  |  |  | AZOBR_p460001 |                                                             |                                     |
|  |  |  | AZOBR_p460002 | 3: 0.00014, 4: 0.00026, 5: 0.00022,                         | 1: 0.00045, 2: 0.00024, 3: 0.00044, |
|  |  |  | AZOBR_p460005 | 3: 0.00005, 5: 0.00004,                                     |                                     |
|  |  |  | AZOBR_p460010 |                                                             |                                     |
|  |  |  | AZOBR_p460011 |                                                             | 1: 0.00011, 3: 0.00014,             |
|  |  |  | AZOBR_p460012 |                                                             | 1: 0.00050, 3: 0.00073,             |
|  |  |  | AZOBR_p460018 |                                                             |                                     |
|  |  |  | AZOBR_p460023 | 1: 0.00151, 2: 0.00095, 3: 0.00174, 4: 0.00096, 5: 0.00067, | 1: 0.00048, 2: 0.00102, 3: 0.00047, |
|  |  |  | AZOBR_p460025 |                                                             | 3: 0.00007,                         |
|  |  |  | AZOBR_p460040 | 1: 0.00019, 2: 0.00017, 3: 0.00021, 4: 0.00030,             | 3: 0.00008,                         |
|  |  |  | AZOBR_p460042 |                                                             |                                     |
|  |  |  | AZOBR_p460044 |                                                             |                                     |
|  |  |  | AZOBR_p460045 |                                                             |                                     |
|  |  |  | AZOBR_p460046 |                                                             |                                     |
|  |  |  | AZOBR_p460061 |                                                             | 1: 0.00002,                         |
|  |  |  | AZOBR_p460065 | 1: 0.00045, 2: 0.00025, 3: 0.00042,                         | 1: 0.00005, 2: 0.00012,             |

|  |  |  |               |                                                                |                                                                   |
|--|--|--|---------------|----------------------------------------------------------------|-------------------------------------------------------------------|
|  |  |  |               | 4: 0.00023,                                                    |                                                                   |
|  |  |  | AZOBR_p460066 |                                                                |                                                                   |
|  |  |  | AZOBR_p460067 | 1: 0.00011, 2: 0.00019, 3: 0.00016,<br>4: 0.00009, 5: 0.00004, | 2: 0.00008, 3: 0.00007,                                           |
|  |  |  | AZOBR_p460068 | 1: 0.00068, 3: 0.00044, 5: 0.00024,                            |                                                                   |
|  |  |  | AZOBR_p460070 |                                                                | 2: 0.00006,                                                       |
|  |  |  | AZOBR_p460071 | 3: 0.00023, 4: 0.00014,                                        | 1: 0.00025, 2: 0.00020,<br>3: 0.00032,                            |
|  |  |  | AZOBR_p460073 | 1: 0.00140, 2: 0.00099, 3: 0.00128,<br>4: 0.00120, 5: 0.00094, | 1: 0.00188, 2: 0.00141,<br>3: 0.00144,                            |
|  |  |  | AZOBR_p460074 | 1: 0.00015, 2: 0.00007, 4: 0.00018,<br>5: 0.00021,             | 1: 0.00024, 2: 0.00024,<br>3: 0.00035,                            |
|  |  |  | AZOBR_p460092 |                                                                | 2: 0.00026, 3: 0.00038,                                           |
|  |  |  | AZOBR_p470004 | 1: 0.00023, 3: 0.00020, 4: 0.00032,                            | 1: 0.00052, 2: 0.00017,<br>3: 0.00094,                            |
|  |  |  | AZOBR_p470012 |                                                                |                                                                   |
|  |  |  | AZOBR_p470013 |                                                                |                                                                   |
|  |  |  | AZOBR_p470015 |                                                                |                                                                   |
|  |  |  | AZOBR_p470016 | 1: 0.00117, 2: 0.00169, 3: 0.00133,<br>4: 0.00150, 5: 0.00150, | 1: 0.00242, 2: 0.00225,<br>3: 0.00192,                            |
|  |  |  | AZOBR_p470017 |                                                                |                                                                   |
|  |  |  | AZOBR_p470020 |                                                                |                                                                   |
|  |  |  | AZOBR_p470021 |                                                                | 1: 0.00004, 2: 0.00006,<br>3: 0.00014,                            |
|  |  |  | AZOBR_p470024 |                                                                | 3: 0.00004,                                                       |
|  |  |  | AZOBR_p470034 |                                                                | 1: 0.00005, 2: 0.00007,                                           |
|  |  |  | AZOBR_p470039 | 1: 0.00029, 2: 0.00015, 3: 0.00024,<br>4: 0.00016, 5: 0.00020, | 2: 0.00038, 3: 0.00014,                                           |
|  |  |  | AZOBR_p470042 |                                                                |                                                                   |
|  |  |  | AZOBR_p470043 | 2: 0.00011, 3: 0.00033, 4: 0.00040,<br>5: 0.00018,             | 1: 0.00057, 2: 0.00056,<br>3: 0.00052,                            |
|  |  |  | AZOBR_p470046 | 5: 0.00011,                                                    | 1: 0.00007, 2: 0.00016,<br>3: 0.00010,                            |
|  |  |  | AZOBR_p470061 | 1: 0.00007,                                                    |                                                                   |
|  |  |  | AZOBR_p470067 | 4: 0.00015,                                                    |                                                                   |
|  |  |  | AZOBR_p470068 | 2: 0.00056, 3: 0.00046, 4: 0.00056,<br>5: 0.00019,             | 3: 0.00017,                                                       |
|  |  |  | AZOBR_p470069 | 1: 0.00010, 2: 0.00015, 3: 0.00028,<br>4: 0.00017, 5: 0.00012, | 1: 0.00002, 3: 0.00003,                                           |
|  |  |  | AZOBR_p470070 | 2: 0.00026, 4: 0.00041, 5: 0.00041,                            |                                                                   |
|  |  |  | AZOBR_p470083 | 3: 0.00012,                                                    |                                                                   |
|  |  |  | AZOBR_p470098 |                                                                |                                                                   |
|  |  |  | AZOBR_p480004 |                                                                |                                                                   |
|  |  |  | AZOBR_p480018 | 2: 0.00005, 3: 0.00005,                                        |                                                                   |
|  |  |  | AZOBR_p480019 |                                                                | 1: 0.00025, 2: 0.00037,<br>3: 0.00028,                            |
|  |  |  | AZOBR_p480025 |                                                                |                                                                   |
|  |  |  | AZOBR_p480027 |                                                                | 3: 0.00025,                                                       |
|  |  |  | AZOBR_p480032 |                                                                |                                                                   |
|  |  |  | AZOBR_p480035 |                                                                |                                                                   |
|  |  |  | AZOBR_p480054 | 1: 0.00010, 3: 0.00022, 4: 0.00028,<br>5: 0.00028,             | 1: 0.00023, 3: 0.00016,                                           |
|  |  |  | AZOBR_p480055 | 1: 0.00013, 2: 0.00008, 3: 0.00018,<br>4: 0.00012, 5: 0.00018, | 2: 0.00016, 3: 0.00013,<br>1: 0.00100, 2: 0.00049,<br>3: 0.00083, |
|  |  |  | AZOBR_p480058 |                                                                |                                                                   |
|  |  |  | AZOBR_p480060 | 1: 0.00080, 2: 0.00053, 3: 0.00063,<br>4: 0.00055, 5: 0.00032, | 1: 0.00021, 2: 0.00044,<br>3: 0.00046,                            |
|  |  |  | AZOBR_p480077 | 1: 0.00043, 2: 0.00053, 3: 0.00066,<br>4: 0.00012, 5: 0.00030, | 1: 0.00017, 2: 0.00013,<br>3: 0.00032,                            |
|  |  |  | AZOBR_p480080 | 3: 0.00007, 4: 0.00004, 5: 0.00004,                            | 1: 0.00007, 2: 0.00004,<br>3: 0.00007,                            |
|  |  |  | AZOBR_p480081 | 5: 0.00009,                                                    |                                                                   |
|  |  |  | AZOBR_p480082 |                                                                |                                                                   |
|  |  |  | AZOBR_p480084 |                                                                | 2: 0.00010, 3: 0.00013,                                           |
|  |  |  | AZOBR_p50013  |                                                                |                                                                   |
|  |  |  | AZOBR_p50020  |                                                                | 2: 0.00018, 3: 0.00015,<br>3: 0.00015,                            |
|  |  |  | AZOBR_p50030  | 5: 0.00007,                                                    |                                                                   |
|  |  |  | AZOBR_p50063  | 1: 0.00025, 3: 0.00025, 4: 0.00035,<br>5: 0.00044,             | 2: 0.00028, 3: 0.00008,<br>1: 0.00021, 2: 0.00017,<br>3: 0.00020, |
|  |  |  | AZOBR_p50064  | 1: 0.00027, 4: 0.00025, 5: 0.00025,                            | 2: 0.00003, 3: 0.00004,                                           |
|  |  |  | AZOBR_p50095  |                                                                |                                                                   |
|  |  |  | AZOBR_p50100  |                                                                |                                                                   |
|  |  |  | AZOBR_p50101  | 1: 0.00973, 2: 0.01268, 3: 0.00907,<br>4: 0.01053, 5: 0.01097, | 1: 0.01128, 2: 0.00798,<br>3: 0.00979,                            |
|  |  |  | AZOBR_p50105  |                                                                |                                                                   |
|  |  |  | AZOBR_p50106  |                                                                | 2: 0.00007, 3: 0.00006,                                           |
|  |  |  | AZOBR_p50108  |                                                                |                                                                   |
|  |  |  | AZOBR_p50114  | 3: 0.00006,                                                    |                                                                   |
|  |  |  | AZOBR_p50121  | 4: 0.00003,                                                    | 1: 0.00003, 3: 0.00003,                                           |
|  |  |  | AZOBR_p50122  | 3: 0.00023, 4: 0.00019, 5: 0.00031,                            |                                                                   |
|  |  |  | AZOBR_p50123  | 3: 0.00003,                                                    |                                                                   |
|  |  |  | AZOBR_p50127  |                                                                | 3: 0.00006,                                                       |
|  |  |  | AZOBR_p50144  | 4: 0.00024, 5: 0.00016,                                        | 1: 0.00015, 3: 0.00029,                                           |
|  |  |  | AZOBR_p50153  | 1: 0.00016, 4: 0.00008,                                        |                                                                   |
|  |  |  | AZOBR_p50159  |                                                                | 1: 0.00006, 2: 0.00007,<br>3: 0.00007,                            |
|  |  |  | AZOBR_p50160  |                                                                | 3: 0.00004,                                                       |

|  |  |              |                                     |                         |
|--|--|--------------|-------------------------------------|-------------------------|
|  |  | AZOBR_p50162 |                                     | 3: 0.00003,             |
|  |  | AZOBR_p50165 |                                     |                         |
|  |  | AZOBR_p60001 |                                     | 1: 0.00006,             |
|  |  | AZOBR_p60003 |                                     |                         |
|  |  | AZOBR_p60004 |                                     | 3: 0.00015,             |
|  |  |              |                                     | 1: 0.00006, 2: 0.00007, |
|  |  | AZOBR_p60006 | 3: 0.00008,                         | 3: 0.00006,             |
|  |  |              | 1: 0.00005, 3: 0.00017, 4: 0.00011, |                         |
|  |  | AZOBR_p60009 | 5: 0.00005,                         |                         |
|  |  | AZOBR_p60010 |                                     |                         |
|  |  | AZOBR_p60011 |                                     | 3: 0.00002,             |
|  |  | AZOBR_p60012 | 3: 0.00015,                         |                         |
|  |  |              | 1: 0.00254, 2: 0.00201, 3: 0.00201, | 1: 0.00094, 2: 0.00133, |
|  |  | AZOBR_p60015 | 4: 0.00144, 5: 0.00129,             | 3: 0.00105,             |
|  |  |              | 1: 0.00041, 3: 0.00022, 4: 0.00021, |                         |
|  |  | AZOBR_p60018 | 5: 0.00039,                         | 3: 0.00006,             |
|  |  | AZOBR_p60019 |                                     |                         |
|  |  | AZOBR_p60020 | 3: 0.00013, 4: 0.00031,             | 3: 0.00009,             |
|  |  |              | 1: 0.00011, 2: 0.00014, 3: 0.00023, | 1: 0.00007, 2: 0.00008, |
|  |  | AZOBR_p60023 | 4: 0.00007, 5: 0.00007,             | 3: 0.00012,             |
|  |  | AZOBR_p60024 | 1: 0.00024, 3: 0.00014, 5: 0.00008, | 1: 0.00005, 3: 0.00010, |
|  |  | AZOBR_p60028 |                                     | 2: 0.00006,             |
|  |  | AZOBR_p60029 | 2: 0.00006,                         |                         |
|  |  | AZOBR_p60030 | 5: 0.00010,                         | 2: 0.00011, 3: 0.00009, |
|  |  | AZOBR_p60031 |                                     | 1: 0.00003, 3: 0.00003, |
|  |  | AZOBR_p60033 |                                     |                         |
|  |  | AZOBR_p60035 | 4: 0.00016, 5: 0.00005,             |                         |
|  |  | AZOBR_p60036 |                                     |                         |
|  |  | AZOBR_p60037 | 2: 0.00025,                         |                         |
|  |  | AZOBR_p60041 | 5: 0.00007,                         |                         |
|  |  | AZOBR_p60042 |                                     |                         |
|  |  | AZOBR_p60044 |                                     |                         |
|  |  | AZOBR_p60045 |                                     |                         |
|  |  | AZOBR_p60046 | 5: 0.00007,                         | 3: 0.00006,             |
|  |  | AZOBR_p60050 |                                     |                         |
|  |  | AZOBR_p60051 |                                     |                         |
|  |  |              | 2: 0.00011, 3: 0.00004, 4: 0.00003, | 1: 0.00003, 2: 0.00005, |
|  |  | AZOBR_p60052 | 5: 0.00003,                         | 3: 0.00003,             |
|  |  |              | 1: 0.00038, 2: 0.00019, 3: 0.00027, | 1: 0.00041, 2: 0.00035, |
|  |  | AZOBR_p60055 | 4: 0.00022, 5: 0.00026,             | 3: 0.00037,             |
|  |  |              |                                     | 1: 0.00016, 2: 0.00011, |
|  |  | AZOBR_p60056 | 2: 0.00009, 3: 0.00009,             | 3: 0.00035,             |
|  |  | AZOBR_p60058 |                                     |                         |
|  |  |              |                                     | 1: 0.00025, 2: 0.00029, |
|  |  | AZOBR_p60063 |                                     | 3: 0.00037,             |
|  |  | AZOBR_p60065 | 4: 0.00006,                         | 1: 0.00005, 3: 0.00008, |
|  |  | AZOBR_p60066 |                                     |                         |
|  |  |              | 1: 0.00311, 2: 0.00379, 3: 0.00353, | 1: 0.00209, 2: 0.00183, |
|  |  | AZOBR_p60067 | 4: 0.00245, 5: 0.00276,             | 3: 0.00331,             |
|  |  | AZOBR_p60068 | 1: 0.00013, 4: 0.00009, 5: 0.00005, | 1: 0.00004, 3: 0.00006, |
|  |  |              | 1: 0.00052, 2: 0.00040, 3: 0.00050, | 1: 0.00066, 2: 0.00042, |
|  |  | AZOBR_p60069 | 4: 0.00076, 5: 0.00067,             | 3: 0.00040,             |
|  |  |              | 1: 0.00074, 2: 0.00085, 3: 0.00061, | 1: 0.00087, 2: 0.00050, |
|  |  | AZOBR_p60069 | 4: 0.00105, 5: 0.00086,             | 3: 0.00087,             |
|  |  | AZOBR_p60070 | 3: 0.00017, 4: 0.00028, 5: 0.00007, | 3: 0.00016,             |
|  |  |              | 1: 0.00017, 3: 0.00022, 4: 0.00021, | 1: 0.00006, 2: 0.00022, |
|  |  | AZOBR_p60071 | 5: 0.00012,                         | 3: 0.00008,             |
|  |  | AZOBR_p60076 | 1: 0.00016, 3: 0.00021, 4: 0.00022, |                         |
|  |  | AZOBR_p60078 |                                     |                         |
|  |  | AZOBR_p60080 | 5: 0.00007,                         |                         |
|  |  | AZOBR_p60086 |                                     |                         |
|  |  | AZOBR_p60087 | 2: 0.00004, 3: 0.00006,             | 1: 0.00005, 3: 0.00003, |
|  |  | AZOBR_p60091 |                                     | 2: 0.00007, 3: 0.00008, |
|  |  | AZOBR_p60092 |                                     |                         |
|  |  | AZOBR_p60093 | 3: 0.00045,                         |                         |
|  |  | AZOBR_p60098 | 4: 0.00004,                         |                         |
|  |  | AZOBR_p60099 |                                     | 3: 0.00003,             |
|  |  | AZOBR_p60100 | 2: 0.00011,                         |                         |
|  |  | AZOBR_p60109 | 3: 0.00001, 4: 0.00001, 5: 0.00001, |                         |
|  |  | AZOBR_p60111 | 3: 0.00008,                         |                         |
|  |  | AZOBR_p60112 |                                     | 1: 0.00015,             |
|  |  | AZOBR_p60120 |                                     |                         |
|  |  | AZOBR_p60124 | 2: 0.00005, 4: 0.00004, 5: 0.00006, |                         |
|  |  |              |                                     | 1: 0.00003, 2: 0.00003, |
|  |  | AZOBR_p60125 | 3: 0.00002,                         | 3: 0.00003,             |

Protein abundance of *Azospirillum lipoferum* 4B and *Azospirillum brasilense* Sp245 as a fraction of the total detected protein. The abundance is displayed for each control and nitrogen fixation replicate. 4 control and 4 nitrogen fixation replicates were produced for 4B. 5 control and 3 nitrogen fixation replicates were produced for Sp245. The data is displayed as (replicate number): (fraction of detected protein). Absent replicates indicate that the protein was not detected during that run. Abundance was calculated as described in Materials and Methods.
