# Supplementary material for: Azospirillum Genomes Reveal Transition of Bacteria from Aquatic to Terrestrial Environments
Source: PubMed Central journal article supplement (PMC3245306; doi:10.1371/journal.pgen.1002430), 2011-12-22
Supplement: pgen.1002430.s013.pdf [file pgen.1002430.s013.pdf]

**Table S10.** Orthologous chemotaxis operons in *Azospirillum* and *Rhodospirillum centenum*

| <b>Chemotaxis genes</b> | <b><i>R. centenum</i> SW</b> | <b><i>A. brasilense</i> Sp245</b> | <b><i>A. iipoferum</i> 4B</b> | <b><i>Azospirillum</i> sp. B510</b> |
|-------------------------|------------------------------|-----------------------------------|-------------------------------|-------------------------------------|
| <b>Operon 1 - F5</b>    |                              |                                   |                               |                                     |
| CheA                    | RC1_1758                     | AZOBR_p1130073                    | AZOLI_p40444                  | AZL_d03050                          |
| CheW                    | RC1_1757                     | AZOBR_p1130074                    | AZOLI_p40443                  | AZL_d03040                          |
| CheY                    | RC1_1756                     | AZOBR_p1130075                    | AZOLI_p40442                  | AZL_d03030                          |
| CheB                    | RC1_1755                     | AZOBR_p1130076                    | AZOLI_p40441                  | AZL_d03020                          |
| CheR                    | RC1_1754                     | AZOBR_p1130077                    | AZOLI_p40440                  | AZL_d03010                          |
| <b>Operon 2 - F9</b>    |                              |                                   |                               |                                     |
| MCP                     | RC1_0344                     | AZOBR_p280105                     | AZOLI_p40518                  | AZL_d03500                          |
| CheW                    | RC1_0343                     | AZOBR_p280107                     | AZOLI_p40517                  | AZL_d03490                          |
| CheB                    | RC1_0342                     | AZOBR_p280108                     | AZOLI_p40516                  | AZL_d03480                          |
| Other (HEAT)            | RC1_0341                     | AZOBR_p280109                     | AZOLI_p40515                  | AZL_d03470                          |
| CheR                    | RC1_0340                     | AZOBR_p280110                     | AZOLI_p40514                  | AZL_d03460                          |
| CheY                    | RC1_0339                     | AZOBR_p280111                     | AZOLI_p40513                  | AZL_d03450                          |
| CheA                    | RC1_0338, RC1_0337           | AZOBR_p280112                     | AZOLI_p40512                  | AZL_d03440                          |
| <b>Operon 3 - ACF</b>   |                              |                                   |                               |                                     |
| CheY                    | RC1_2133                     |                                   |                               |                                     |
| CheW                    | RC1_2132                     | AZOBR_p1100030                    | AZOLI_p20369                  | AZL_a03160                          |
| CheR                    | RC1_2131, RC1_2130           | AZOBR_p1100031                    | AZOLI_p20368                  | AZL_a03150                          |
| CheW                    | RC1_2129                     | AZOBR_p1100032                    | AZOLI_p20367                  | AZL_a03140                          |
| MCP                     | RC1_2128                     | AZOBR_p1100034                    | AZOLI_p20366                  | AZL_a03130                          |
| CheA                    | RC1_2127, RC1_2126           | AZOBR_p1100035                    | AZOLI_p20364                  | AZL_a03120                          |
| CheB                    | RC1_2125                     | AZOBR_p1100037                    | AZOLI_p20363                  | AZL_a03110                          |
| RR                      | RC1_2124                     | AZOBR_p1100039                    | AZOLI_p20362                  | AZL_a03100                          |
| <b>Operon 4 - F7</b>    |                              |                                   |                               |                                     |
| CheY                    |                              | AZOBR_200200                      | AZOLI_2425                    | AZL_023410                          |
| CheA                    |                              | AZOBR_200201, AZOBR_200202        | AZOLI_2426                    | AZL_023420                          |
| CheW                    |                              | AZOBR_200203                      | AZOLI_2427                    | AZL_023430                          |
| MCP                     |                              | AZOBR_200204                      | AZOLI_2428                    |                                     |
| CheR                    |                              | AZOBR_200205                      | AZOLI_2429                    | AZL_023450                          |
| CheD                    |                              | AZOBR_200206                      | AZOLI_2430                    | AZL_023460                          |
| CheB                    |                              | AZOBR_200207                      | AZOLI_2431                    | AZL_023470                          |
| MCP                     |                              | AZOBR_200208                      | AZOLI_2432                    | AZL_023480                          |
| <b>Operon 5 - Unc</b>   |                              |                                   |                               |                                     |
| MCP                     |                              |                                   | AZOLI_1666                    | AZL_016690                          |
| MCP                     |                              |                                   | AZOLI_1665                    | AZL_016680                          |
| CheR                    |                              |                                   | AZOLI_1664                    | AZL_016670                          |
| CheW                    |                              |                                   | AZOLI_1663                    | AZL_016660                          |

|                      |  |  |            |            |
|----------------------|--|--|------------|------------|
| CheB                 |  |  | AZOLI_1662 | AZL_016650 |
| CheY                 |  |  | AZOLI_1661 | AZL_016640 |
| CheA                 |  |  | AZOLI_1660 | AZL_016630 |
| <b>Operon 6 - F8</b> |  |  |            |            |
| CheY                 |  |  |            | AZL_a08750 |
| CheA                 |  |  |            | AZL_a08740 |
| CheW                 |  |  |            | AZL_a08730 |
| MCP                  |  |  |            | AZL_a08720 |
| CheW                 |  |  |            | AZL_a08710 |
| CheR                 |  |  |            | AZL_a08700 |
| CheB                 |  |  |            | AZL_a08690 |
| MCP                  |  |  |            | AZL_a08680 |
