# Supplementary material for: Azospirillum Genomes Reveal Transition of Bacteria from Aquatic to Terrestrial Environments
Source: PubMed Central journal article supplement (PMC3245306; doi:10.1371/journal.pgen.1002430), 2011-12-22
Supplement: pgen.1002430.s014.pdf [file pgen.1002430.s014.pdf]

**Table S11.** Classification of chemotaxis systems in rhizosphere

| <b>Clone name</b> | <b>Assigned chemotaxis class</b> |
|-------------------|----------------------------------|
| crootA02          | F7                               |
| crootA03          | F8                               |
| crootA04          | F5                               |
| crootA05          | F5                               |
| crootA07          | F7                               |
| crootA09          | F5                               |
| crootA11          | F5                               |
| crootA12          | F7                               |
| crootB01          | F7                               |
| crootB02          | F7                               |
| crootB03          | F5                               |
| crootB04          | F5                               |
| crootB05          | F5                               |
| crootB06          | F2                               |
| crootB07          | Unc                              |
| crootB08          | F7                               |
| crootB09          | F5                               |
| crootB10          | F7                               |
| crootB11          | F7                               |
| crootB12          | Unc                              |
| crootC01          | F7                               |
| crootC02          | F7                               |
| crootC03          | F5                               |
| crootC04          | Unc                              |
| crootC05          | F7                               |
| crootC06          | F5                               |
| crootC07          | Unc                              |
| crootC08          | Unc                              |
| crootC09          | F8                               |
| crootC10          | F5                               |
| crootC11          | F5                               |
| crootclone1       | F3                               |
| crootclone2       | F8                               |
| crootclone3       | F5                               |
| crootD01          | F5                               |
| crootD02          | Unc                              |
| crootD03          | F7                               |
| crootD04          | ACF                              |
| crootD08          | F7                               |
| crootD09          | F7                               |
| crootD10          | F7                               |
| crootD11          | F8                               |
| crootD12          | F7                               |
| crootE01          | F7                               |
| crootE02          | F7                               |
| crootE03          | Tfp                              |
| crootE04          | F2                               |
| crootE06          | F5                               |
| crootE07          | F2                               |
| crootE08          | F8                               |
| crootE10          | F7                               |
| crootE12          | F8                               |
| crootF01          | F7                               |
| crootF03          | F7                               |
| crootF04          | F7                               |
| crootF07          | F7                               |
| crootF08          | F5                               |
| crootF09          | ACF                              |
| crootF10          | Unc                              |
| crootF12          | F7                               |
| crootG01          | F8                               |
| crootG03          | Unc                              |
| crootG04          | F7                               |
| crootG05          | F7                               |
| crootG06          | F7                               |
| crootG07          | F8                               |
| crootG08          | F5                               |
| crootG09          | F7                               |

|           |     |
|-----------|-----|
| cprootG10 | F7  |
| cprootG11 | F7  |
| cprootG12 | F5  |
| cprootH01 | F5  |
| cprootH02 | Unc |
| cprootH03 | F2  |
| cprootH05 | F7  |
| cprootH06 | F5  |
| cprootH07 | F7  |
| cprootH08 | F5  |
| cprootH09 | F5  |
| cprootH10 | ACF |
| cprootH11 | F7  |
| cprootH12 | F7  |
| soilA01   | F7  |
| soilA01   | F7  |
| soilA02   | Unc |
| soilA02N  | Unc |
| soilA03   | F7  |
| soilA03N  | F7  |
| soilA04   | F5  |
| soilA04N  | F8  |
| soilA05   | F7  |
| soilA05N  | Unc |
| soilA06   | F7  |
| soilA06N  | F7  |
| soilA07   | F7  |
| soilA07N  | Unc |
| soilA08   | Unc |
| soilA08N  | F7  |
| soilA09   | F7  |
| soilA09N  | Unc |
| soilA10N  | F5  |
| soilA11   | Unc |
| soilA11N  | F7  |
| soilA12   | F7  |
| soilA12N  | Tfp |
| soilB01   | F7  |
| soilB01N  | F2  |
| soilB02   | F5  |
| soilB03   | F5  |
| soilB03N  | F7  |
| soilB04   | F7  |
| soilB04N  | Tfp |
| soilB05   | F2  |
| soilB05N  | Tfp |
| soilB06   | F6  |
| soilB07   | F7  |
| soilB08N  | F7  |
| soilB09   | F7  |
| soilB09N  | F5  |
| soilB10   | Unc |
| soilB10N  | F8  |
| soilB11   | F2  |
| soilB11N  | F7  |
| soilB12   | Unc |
| soilB12N  | F5  |
| soilC01   | F7  |
| soilC01N  | Unc |
| soilC02   | F8  |
| soilC02N  | F2  |
| soilC03   | F7  |
| soilC03N  | F7  |
| soilC04   | F2  |
| soilC04N  | F7  |
| soilC05   | F7  |
| soilC05N  | F7  |
| soilC06   | F8  |
| soilC06N  | F7  |
| soilC07   | F7  |
| soilC08   | F5  |
| soilC08N  | F7  |
| soilC09   | F7  |
| soilC10   | F7  |
| soilC11   | F2  |

|             |     |
|-------------|-----|
| soilC11N    | F7  |
| soilC12     | Unc |
| soilC12N    | F7  |
| soilCL1     | F7  |
| soilCL2     | F7  |
| soilCL2B    | F7  |
| soilCL3     | F7  |
| soilCL3b    | F7  |
| soilCL4b    | F5  |
| soilCL5b    | F2  |
| soilclone10 | F7  |
| soilclone2  | F8  |
| soilclone3  | F2  |
| soilclone5  | F2  |
| soilclone6  | F8  |
| soilclone7  | F2  |
| soilclone8a | F8  |
| soilclone9  | F7  |
| soilD01     | F6  |
| soilD01N    | F7  |
| soilD02     | F2  |
| soilD02N    | F7  |
| soilD03     | F7  |
| soilD03N    | F5  |
| soilD04     | F8  |
| soilD04N    | F13 |
| soilD05     | F7  |
| soilD05N    | Unc |
| soilD06     | F7  |
| soilD06N    | F5  |
| soilD07N    | F7  |
| soilD08     | F5  |
| soilD08a    | F7  |
| soilD09     | F7  |
| soilD09N    | F7  |
| soilD10     | F5  |
| soilD10N    | F7  |
| soilD11     | F7  |
| soilD11N    | F7  |
| soilD12     | F7  |
| soilD12N    | F7  |
| soilE02N    | Tfp |
| soilE03N    | F7  |
| soilE04N    | F5  |
| soilE05N    | F2  |
| soilE06N    | F7  |
| soilE07N    | F7  |
| soilE08N    | F5  |
| soilE10N    | F7  |
| soilE12N    | F5  |
| soilF02N    | Tfp |
| soilF03N    | F7  |
| soilF04     | F13 |
| soilF05N    | F7  |
| soilF06N    | Unc |
| soilF07N    | F5  |
| soilF08N    | F5  |
| soilF09N    | Unc |
| soilF10N    | F13 |
| soilF11N    | F7  |
| soilF12N    | F5  |
| soilG01N    | F7  |
| soilG04N    | Unc |
| soilG05N    | Unc |
| soilG06     | F7  |
| soilG07N    | F6  |
| soilG08N    | F7  |
| soilG09N    | F1  |
| soilG10N    | F7  |
| soilG11N    | F7  |
| soilG12     | Unc |
| soilH01N    | F13 |
| soilH02N    | F5  |
| soilH03N    | F5  |
| soilH05N    | F7  |

|                     |     |
|---------------------|-----|
| soilH06N            | F7  |
| soilH07N            | Unc |
| soilH08N            | F7  |
| soilH10N            | Unc |
| soilH11N            | F5  |
| soilH12N            | F7  |
| whtrootA01          | F5  |
| whtrootA02          | Unc |
| whtrootA03          | F7  |
| whtrootA04          | F5  |
| whtrootA06          | F8  |
| whtrootA07          | F7  |
| whtrootA08          | F8  |
| whtrootA10          | F7  |
| whtrootA12          | F7  |
| whtrootB01          | F8  |
| whtrootB05          | F7  |
| whtrootB06          | F7  |
| whtrootB07          | F8  |
| whtrootB08          | Unc |
| whtrootB09          | F7  |
| whtrootB10          | F7  |
| whtrootB11          | F5  |
| whtrootB12          | F7  |
| whtrootC01          | F2  |
| whtrootC02          | F7  |
| whtrootC03          | F8  |
| whtrootC04          | F7  |
| whtrootC05          | F7  |
| whtrootC06          | F7  |
| whtrootC07          | F8  |
| whtrootC08          | F7  |
| whtrootC09          | F8  |
| whtrootC10          | F13 |
| whtrootC12          | F7  |
| whtrootclone2       | F7  |
| whtrootclone3       | F8  |
| whtrootclone4       | F7  |
| whtrootclone6       | F8  |
| whtrootD01          | F5  |
| whtrootD02          | F2  |
| whtrootD05          | Unc |
| whtrootD07          | F7  |
| whtrootD09          | F6  |
| whtrootD10          | F1  |
| whtrootD11          | F8  |
| whtrootD12          | F8  |
| whtrootE01          | F7  |
| whtrootE02          | F7  |
| whtrootE03          | F7  |
| whtrootE04          | F8  |
| whtrootE05          | F7  |
| whtrootE06          | F8  |
| whtrootE07          | F13 |
| whtrootE09          | F8  |
| whtrootE10          | F7  |
| whtrootE11          | F7  |
| whtrootE12          | F8  |
| whtrootF01          | F13 |
| whtrootF02          | F7  |
| whtrootF03          | F7  |
| whtrootF04          | F7  |
| whtrootF05          | F8  |
| whtrootF06          | F8  |
| whtrootF08          | F7  |
| whtrootF09          | F5  |
| whtrootF10x429bpFOR | F7  |
| whtrootF11          | F7  |
| whtrootF12          | F8  |
| whtrootG01          | F7  |
| whtrootG03          | Unc |
| whtrootG04          | F7  |
| whtrootG05          | F5  |
| whtrootG06          | Unc |
| whtrootG08          | F7  |

|            |     |
|------------|-----|
| whtrootG09 | F7  |
| whtrootG10 | F2  |
| whtrootG11 | F7  |
| whtrootG12 | F7  |
| whtrootH02 | F2  |
| whtrootH03 | F8  |
| whtrootH04 | F7  |
| whtrootH06 | F5  |
| whtrootH07 | F7  |
| whtrootH10 | F7  |
| whtrootH12 | Unc |

Clones were classified as described in Materials and Methods.
