# Supplementary material for: Azospirillum Genomes Reveal Transition of Bacteria from Aquatic to Terrestrial Environments
Source: PubMed Central journal article supplement (PMC3245306; doi:10.1371/journal.pgen.1002430), 2011-12-22
Supplement: pgen.1002430.s015.pdf [file pgen.1002430.s015.pdf]

**Table S12.** Putative complex carbohydrate-degrading enzymes in three *Azospirillum* species in comparison with a soil cellulolytic bacterium *Thermobifida fusca*

| CAZy family | Putative activity                                           | <i>A. lipoferum</i> 4B | <i>A. brasilense</i> Sp245 | <i>A. sp.</i> B510 | <i>T. fusca</i> |
|-------------|-------------------------------------------------------------|------------------------|----------------------------|--------------------|-----------------|
| GH 1        | $\beta$ -glucosidase, cellobiase                            | 4                      | 4                          | 4                  | 2               |
| GH 2        | $\beta$ -mannosidase, $\beta$ -glucuronidase, galactosidase | 1                      | 3                          | 1                  | 1               |
| GH 3        | Xylosidase, $\beta$ -N-acetylhexosaminidase                 | 1                      | 1                          | 2                  | 2               |
| GH 4        | Glucuronidase, galactosidase, glucosidase                   | 1                      | 1                          | 1                  | 1               |
| GH 5        | Mannanase                                                   | 0                      | 0                          | 0                  | 1               |
| GH 5        | Cellulase, endogluconase                                    | 2                      | 3                          | 2                  | 2               |
| GH 6        | Endogluconase                                               | 0                      | 0                          | 0                  | 2               |
| GH 8        | Cellulase, endogluconase                                    | 1                      | 0                          | 1                  | 0               |
| GH 9        | Endogluconase                                               | 0                      | 0                          | 0                  | 2               |
| GH 10, GH11 | Endoxylanase, xylanase                                      | 1                      | 2                          | 1                  | 3               |
| GH 12       | Endogluconase                                               | 0                      | 1                          | 0                  | 0               |
| GH 13, GH15 | Amylase, pullulanase, dextranase                            | 10                     | 14                         | 8                  | 8               |
| GH 16       | Lichninase                                                  | 1                      | 0                          | 1                  | 0               |
| GH 48       | 1,4-exocellulase                                            | 0                      | 0                          | 0                  | 1               |
| GH 17, GH25 | Other                                                       | 4                      | 5                          | 5                  | 12              |
| All         | Glycosyl hydrolases                                         | 26                     | 34                         | 26                 | 37              |

Proteins were assigned to CAZy families as described in Materials and Methods.
