# Supplementary material for: Azospirillum Genomes Reveal Transition of Bacteria from Aquatic to Terrestrial Environments
Source: PLoS Genet. 2011 Dec 22;7(12):e1002430. doi: 10.1371/journal.pgen.1002430 (PMC3245306; doi:10.1371/journal.pgen.1002430)
Supplement: Table S3 — Identification of chromids in Azospirillum by GC content. (PDF) [file pgen.1002430.s006.pdf]

**Table S3.** Identification of chromids in *Azospirillum* by GC content

| Replicon                          | G+C content (%) | Chromid GC content cutoff (%)<br>±0.92% difference with host<br>chromosome |
|-----------------------------------|-----------------|----------------------------------------------------------------------------|
| <b><i>A. lipoferum</i> 4B</b>     |                 |                                                                            |
| AZOLI                             | 67.61           | 68.32 – 66.99                                                              |
| AZOLI_p1                          | 67.57           |                                                                            |
| AZOLI_p2                          | 67.59           |                                                                            |
| AZOLI_p3                          | 67.82           |                                                                            |
| AZOLI_p4                          | 68.30           | outside cutoff                                                             |
| AZOLI_p5                          | 67.73           |                                                                            |
| AZOLI_p6                          | 67.08           |                                                                            |
|                                   |                 | Chromid GC content cutoff (%)<br>±0.92% difference with host<br>chromosome |
| <b><i>A. brasilense</i> Sp245</b> |                 |                                                                            |
| AZOBR                             | 68.61           | 69.24 – 67.98                                                              |
| AZOBR_p1                          | 68.65           |                                                                            |
| AZOBR_p2                          | 68.34           |                                                                            |
| AZOBR_p3                          | 68.23           |                                                                            |
| AZOBR_p4                          | 68.99           |                                                                            |
| AZOBR_p5                          | 66.69           | outside cutoff                                                             |
| AZOBR_p6                          | 66.76           | outside cutoff                                                             |
|                                   |                 | Chromid GC content cutoff (%)<br>±0.92% difference with host<br>chromosome |
| <b><i>A. sp.</i> B510</b>         |                 |                                                                            |
| AZL                               | 67.76           | 68.38 – 67.14                                                              |
| AZL_a                             | 67.64           |                                                                            |
| AZL_b                             | 67.46           |                                                                            |
| AZL_c                             | 67.40           |                                                                            |
| AZL_d                             | 67.97           |                                                                            |
| AZL_e                             | 67.51           |                                                                            |
| AZL_f                             | 65.88           | outside cutoff                                                             |

As described by Harrison *et al.* [1], GC content was calculated for all the replicons. A cutoff value was calculated as GC within  $0.521 \pm 0.399\%$  (mean  $\pm$  standard deviation) of the host chromosome. Those labeled in red are outside this cutoff for chromid definition.

## References:

1. Harrison PW, Lower RP, Kim NK, Young JP (2010) Introducing the bacterial 'chromid': not a chromosome, not a plasmid. Trends Microbiol 18: 141-148.
